# Supplementary material for: Evidence for a role of human blood-borne factors in mediating age-associated changes in molecular circadian rhythms
Source: eLife. 2024 Nov 1;12:RP88322. doi: 10.7554/eLife.88322 (PMC11530234; doi:10.7554/eLife.88322)
Supplement: Figure 1—figure supplement 2—source data 1. [file elife-88322-fig1-figsupp2-data1.xls]

## Sheet: COR-96
StatLIA Enterprise 3.2 - Statistical Ligand Immunoassay Analysis
Copyright (c) 2004 by Brendan Technologies, Inc
Assay Name: COR-96						Report Date:		December 15, 2020 10:51AM
Test Name: CORTICN			Test Code: 35
Lot Number:			Expiration Date:			Test Manufacturer: icm
Assay Date: 12/15/20			Analyst: HWC
Data Entry: 01 (WIZARD2)			Batch Name: 001677.CSV			LIM File:
MC PI: 0.073			CS PI: 0.049 *			SD PI: -			QC PI: 0.058
Baseline Standard Samples
Position	Identity	CPM	Adj CPM	%B/B0		%CV	Prec Prob
1	Trc Actv	40083.1	100043
2		40048.8	99957
	Average	40065.9	100000			0.1	1
3	Bzero	16669.6	41605	98.33
4		17234.4	43015	101.67
	Average	16952	42310	100		2.4	1
Standard Samples
Position	Identity	CPM	Adj CPM	%B/B0	Y-Axis	%CV	Prec Prob	ug/dl	% Diff
5	1	13202.3	32951	77.88	32951			1.1	10
6		13495.2	33683	79.61	33683			0.9	-10
	Average	13348.8	33317	78.74	33317	1.6	1	1	0
7	3	10783	26913	63.61	26913			3.1	3.3
8		10795.7	26945	63.68	26945			3.1	3.3
	Average	10789.4	26929	63.65	26929	0.1	1	3.1	3.3
9	10	8001.95	19972	47.2	19972			9.3	-7
10		7767.68	19387	45.82	19387			10.2	2
	Average	7884.81	19680	46.51	19680	2.1	1	9.7	-3
11	30	4998.34	12475	29.48	12475			33	10
12		5346.1	13343	31.54	13343			27.9	-7
	Average	5172.22	12909	30.51	12909	4.8	1	30.3	1
13	100	3124.04	7797	18.43	7797			128.6	28.6
14		3564.91	8898	21.03	8898			81.2	-18.8
	Average	3344.47	8347	19.73	8347	9.3	0.091	99.7	-0.3
Expected Precision: Variance = .01847 x Adj CPM ^ (1.8)								Precision PI (Standards): 0.411
Control Samples
Position	Identity	CPM	Adj CPM	%B/B0	Y-Axis	%CV	Prec Prob	ug/dl	Tol/%Tg
15	low-1	6145.04	15337	36.25	15337			19.5
16		6103.02	15232	36	15232			19.9
	Average	6124.03	15285	36.13	15285	0.5	1	19.7
17	high-2	4001.48	9987	23.6	9987			58.5
18		3894.75	9721	22.98	9721			62.9
	Average	3948.11	9854	23.29	9854	1.9	1	60.6
Expected Precision: Variance = .01847 x Adj CPM ^ (1.8)								Precision PI (Control Specimens): 1.000
Unknown Samples
Position	Identity	CPM	Adj CPM	%B/B0	Y-Axis	%CV	Prec Prob	ug/dl	Dil Fact
19	Uk-1	8530.61	21291	50.32	21291			7.6	1
20		8328.46	20787	49.13	20787			8.2	1
	Average	8429.53	21039	49.73	21039	1.7	1	7.9	1
21	Uk-2	6572.47	16404	38.77	16404			16.3	1
22		6440.18	16074	37.99	16074			17.3	1
	Average	6506.32	16239	38.38	16239	1.4	1	16.8	1
23	Uk-3	7004.32	17482	41.32	17482			13.7	1
24		7281.61	18174	42.95	18174			12.3	1
	Average	7142.97	17828	42.14	17828	2.7	1	13	1
25	Uk-4	4695.14	11719	27.7	11719			38.6	1
26		4839.57	12079	28.55	12079			35.8	1
	Average	4767.35	11899	28.12	11899	2.1	1	37.2	1
27	Uk-5	7319.24	18268	43.18	18268			12.1	1
28		7287.81	18190	42.99	18190			12.3	1
	Average	7303.52	18229	43.08	18229	0.3	1	12.2	1
29	Uk-6	7137.7	17815	42.11	17815			13	1
30		6630.15	16548	39.11	16548			16	1
	Average	6883.93	17181	40.61	17181	5.2	0.309	14.4	1
31	Uk-7	6812.47	17003	40.19	17003			14.8	1
32		6946.95	17339	40.98	17339			14	1
	Average	6879.71	17171	40.58	17171	1.4	1	14.4	1
33	Uk-8	5545.43	13841	32.71	13841			25.4	1
34		5488.75	13699	32.38	13699			26.1	1
	Average	5517.09	13770	32.55	13770	0.7	1	25.8	1
35	Uk-9	7334.79	18307	43.27	18307			12	1
36		7854.01	19603	46.33	19603			9.8	1
	Average	7594.4	18955	44.8	18955	4.8	1	10.9	1
37	Uk-10	6753.16	16855	39.84	16855			15.2	1
38		6450.5	16100	38.05	16100			17.2	1
	Average	6601.83	16477	38.94	16477	3.2	1	16.2	1
39	Uk-11	7271.03	18148	42.89	18148			12.4	1
40		6950.73	17348	41	17348			14	1
	Average	7110.88	17748	41.95	17748	3.2	1	13.2	1
41	Uk-12	7467.58	18638	44.05	18638			11.4	1
42		7605.6	18983	44.87	18983			10.8	1
	Average	7536.59	18810	44.46	18810	1.3	1	11.1	1
43	Uk-13	7292.96	18202	43.02	18202			12.2	1
44		7382.14	18425	43.55	18425			11.8	1
	Average	7337.55	18314	43.29	18314	0.9	1	12	1
45	Uk-14	6866.69	17138	40.51	17138			14.5	1
46		6768.01	16892	39.92	16892			15.1	1
	Average	6817.35	17015	40.22	17015	1	1	14.8	1
47	Uk-15	6172.88	15407	36.41	15407			19.3	1
48		5814.33	14512	34.3	14512			22.5	1
	Average	5993.6	14959	35.36	14959	4.2	1	20.9	1
Expected Precision: Variance = .01847 x Adj CPM ^ (1.8)								Precision PI (Unknowns): 0.870
Logistic Curve Fit: Fixed Weighted Five Parameter (Asymmetrical) Logistic
Coef a	Coef b	Coef c	Coef d	Coef g	Res Var	R2	Fit Prob
46625.2	0.443	246762	6540.2	100.534	-	1	-
COR-96 Baseline Standards: Adj CPM Response
	Backgrnd	Trc Actv	NSB	Bzero
Stat	-	40066	-	42310
# Ref	-	0	-	30
Ref Mn	-	-	-	157739
Ref %CV				86.1
+/- SE	-	-	-	-0.836
Prob	-	-	-	0.41
COR-96 Standards: Adj CPM Response
	1	3	10	30	100
Stat	33317	26929	19680	12909	8347
# Ref	30	30	30	30	30
Ref Mn	138836	119085	87761	58346	43785
Ref %CV	86.8	90.6	91.2	94.2	76.4
+/- SE	-0.862	-0.84	-0.837	-0.814	-1.042
Prob	0.396	0.408	0.41	0.423	0.306
COR-96 Standards: %B/B0 Response
	1	3	10	30	100
Stat	78.74	63.65	46.51	30.51	19.73
# Ref	30	30	30	30	30
Ref Mn	87.55	73.56	54.2	35.57	31.89
Ref %CV	3	6.4	9.1	13.6	67.5
+/- SE	-2.934	-2.016	-1.539	-0.999	-0.572
Prob	0.007 **	0.053	0.135	0.326	0.572
COR-96 Method Controls
	%LSB/TA	%B0/TA	Max Resp	Min DC	Max DC	ED20	ED50	ED80	StAdj PI	StNor PI	Prec PI	Coef a	Coef b	Coef c	Coef d	Coef g	Fit Prob	Cpr Prob	Par Prob
Stat	8.35	42.31	46625	0.227	314.7	70.7	5.6	0.4				46625	0.443	246762	6540	100.534
# Ref	0	30	28	28	28	30	30	30	6	5	24	28	28	28	28	28	5	150	150
Ref Mn	-	157.74	163672	0.571	1876	147.3	12.3	1.91				163672	0.768	320.7	10730	5.511
Ref %CV		86.1	82.6	31.8	112.9	66.3	32.4	47.8				82.6	34.9	132.8	102.4	83.3
+/- SE	-	-0.836	-0.85	-1.864	-0.724	-0.771	-1.657	-1.629				-0.85	-1.19	568.5	-0.375	20.338
Prob	-	0.41	0.403	0.073	0.475	0.447	0.108	0.114	0.387	0.027 *	0.662	0.403	0.244	.0001 **	0.711	.0001 **	0	0.565	0
COR-96 Control Specimens: Adj CPM Response
	low-1	high-2
Stat	15285	9854
# Ref	30	30
Ref Mn	103815	54130
Ref %CV	96.5	81.7
+/- SE	-0.869	-0.985
Prob	0.392	0.333
COR-96 Control Specimens: %B/B0 Response
	low-1	high-2
Stat	36.13	23.29
# Ref	30	30
Ref Mn	62.58	35.63
Ref %CV	19.7	16
+/- SE	-2.102	-2.25
Prob	0.044 *	0.032 *
COR-96 Control Specimens Concentration
	low-1	high-2
Stat	19.7	60.6
# Ref	30	30
Ref Mn	7.11	34.95
Ref %CV	69.4	44.1
+/- SE	2.508	1.637
Prob	0.018 *	0.112
COR-96 Unknown Specimen Report
Identity	ug/dl	id	Identification	Group 1	Group 2	Group 3	Group 4	Group 5
Uk-1	7.9	Old 1
Uk-2	16.8	Young 1
Uk-3	13	Old 2
Uk-4	37.2	Young 2
Uk-5	12.2	Old 3
Uk-6	14.4	Young 3
Uk-7	14.4	Old 4
Uk-8	25.8	Young 4
Uk-9	10.9	Old 5
Uk-10	16.2	Young 5
Uk-11	13.2	Old 6
Uk-12	11.1	Young 6
Uk-13	12	Old 7
Uk-14	14.8	Young 7
Uk-15	20.9	Old 8
