# Supplementary material for: Evidence for a role of human blood-borne factors in mediating age-associated changes in molecular circadian rhythms
Source: eLife. 2024 Nov 1;12:RP88322. doi: 10.7554/eLife.88322 (PMC11530234; doi:10.7554/eLife.88322)
Supplement: Figure 1—source data 1. [file elife-88322-fig1-data1.xlsx]

## Sheet: TwoWayAnova.Age_and_ToD.All_dat
Data.Stream	Metric	term	p.value	q.value	Group_diff.calc	Group_diff.value	Group_ratio.calc	Group_ratio.value
ActiWatch	Axis3	Time_of_Day	1.33161e-08	1.57796e-06	mean_across_all_subjects[ mean(Subject.Day) - mean(Subject.Night) ]	752.528	mean_across_all_subjects[ mean(Subject.Day) / mean(Subject.Night) ]	5.57889
ActiWatch	Steps	Time_of_Day	8.27074e-09	1.57796e-06	mean_across_all_subjects[ mean(Subject.Day) - mean(Subject.Night) ]	6.98978	mean_across_all_subjects[ mean(Subject.Day) / mean(Subject.Night) ]	6.73439
ActiWatch	Vector.Magnitude	Time_of_Day	4.13127e-08	3.2637e-06	mean_across_all_subjects[ mean(Subject.Day) - mean(Subject.Night) ]	1284.32	mean_across_all_subjects[ mean(Subject.Day) / mean(Subject.Night) ]	5.29306
ActiWatch	Axis1	Time_of_Day	1.12688e-07	5.34141e-06	mean_across_all_subjects[ mean(Subject.Day) - mean(Subject.Night) ]	695.096	mean_across_all_subjects[ mean(Subject.Day) / mean(Subject.Night) ]	5.57318
ActiWatch	Axis2	Time_of_Day	1.03871e-07	5.34141e-06	mean_across_all_subjects[ mean(Subject.Day) - mean(Subject.Night) ]	689.803	mean_across_all_subjects[ mean(Subject.Day) / mean(Subject.Night) ]	4.94009
Zephyr	Posture	Time_of_Day	3.15743e-05	0.00124718	mean_across_all_subjects[ mean(Subject.Day) - mean(Subject.Night) ]	-39.2159	mean_across_all_subjects[ mean(Subject.Day) / mean(Subject.Night) ]	0.429886
Zephyr	VerticalMin	Time_of_Day	6.67276e-05	0.00225921	mean_across_all_subjects[ mean(Subject.Day) - mean(Subject.Night) ]	-0.550152	mean_across_all_subjects[ mean(Subject.Day) / mean(Subject.Night) ]	0.60043
Zephyr	Vertical	Time_of_Day	9.59018e-05	0.00284109	mean_across_all_subjects[ mean(Subject.Day) - mean(Subject.Night) ]	-0.497341	mean_across_all_subjects[ mean(Subject.Day) / mean(Subject.Night) ]	0.979684
Zephyr	VerticalPeak	Time_of_Day	0.000141763	0.00373309	mean_across_all_subjects[ mean(Subject.Day) - mean(Subject.Night) ]	-0.449594	mean_across_all_subjects[ mean(Subject.Day) / mean(Subject.Night) ]	-7.27603
Zephyr	ECGNoise	Time_of_Day	0.000211725	0.00501788	mean_across_all_subjects[ mean(Subject.Day) - mean(Subject.Night) ]	3.66435e-05	mean_across_all_subjects[ mean(Subject.Day) / mean(Subject.Night) ]	1.93535
Zephyr	Activity	Time_of_Day	0.000326399	0.00703242	mean_across_all_subjects[ mean(Subject.Day) - mean(Subject.Night) ]	0.0434936	mean_across_all_subjects[ mean(Subject.Day) / mean(Subject.Night) ]	2.93532
ActiWatch	Lux	Time_of_Day	0.000498563	0.00984662	mean_across_all_subjects[ mean(Subject.Day) - mean(Subject.Night) ]	70.3049	mean_across_all_subjects[ mean(Subject.Day) / mean(Subject.Night) ]	52194.3
Zephyr	PeakAccel	Time_of_Day	0.000552996	0.0100815	mean_across_all_subjects[ mean(Subject.Day) - mean(Subject.Night) ]	0.0834112	mean_across_all_subjects[ mean(Subject.Day) / mean(Subject.Night) ]	2.5119
Zephyr	HR	Time_of_Day	0.000931512	0.0157692	mean_across_all_subjects[ mean(Subject.Day) - mean(Subject.Night) ]	15.0855	mean_across_all_subjects[ mean(Subject.Day) / mean(Subject.Night) ]	1.25882
Kubios	SD_HR_(1/min)...WHOLE_DATA...Time-Domain	Age_group	0.00266624	0.0421266	mean(Old) - mean(Young)	-1.88763	mean(Old) / mean(Young)	0.491394
Kubios	PNS_index...WHOLE_DATA...Overview	Time_of_Day	0.00426479	0.0631721	mean_across_all_subjects[ mean(Subject.Day) - mean(Subject.Night) ]	-0.701005	mean_across_all_subjects[ mean(Subject.Day) / mean(Subject.Night) ]	0.712416
Kubios	SDNN_(ms)...WHOLE_DATA...Time-Domain	Time_of_Day	0.0047678	0.0664687	mean_across_all_subjects[ mean(Subject.Day) - mean(Subject.Night) ]	-4.65633	mean_across_all_subjects[ mean(Subject.Day) / mean(Subject.Night) ]	0.885345
Kubios	EE_activity_(kcal/min)...WHOLE_DATA...Overview	Time_of_Day	0.00644568	0.0804013	mean_across_all_subjects[ mean(Subject.Day) - mean(Subject.Night) ]	0.933454	mean_across_all_subjects[ mean(Subject.Day) / mean(Subject.Night) ]	11.5762
Kubios	Max_HR_(1/min)...WHOLE_DATA...Time-Domain	Time_of_Day	0.00617344	0.0804013	mean_across_all_subjects[ mean(Subject.Day) - mean(Subject.Night) ]	10.7823	mean_across_all_subjects[ mean(Subject.Day) / mean(Subject.Night) ]	1.1551
Zephyr	CoreTemp	Time_of_Day	0.00680697	0.0806626	mean_across_all_subjects[ mean(Subject.Day) - mean(Subject.Night) ]	3.72516	mean_across_all_subjects[ mean(Subject.Day) / mean(Subject.Night) ]	1.10148
Kubios	Mean_HR_(1/min)...WHOLE_DATA...Time-Domain	Time_of_Day	0.00880026	0.0990136	mean_across_all_subjects[ mean(Subject.Day) - mean(Subject.Night) ]	9.21027	mean_across_all_subjects[ mean(Subject.Day) / mean(Subject.Night) ]	1.15961
Kubios	SNS_index...WHOLE_DATA...Overview	Time_of_Day	0.00919113	0.0990136	mean_across_all_subjects[ mean(Subject.Day) - mean(Subject.Night) ]	0.969162	mean_across_all_subjects[ mean(Subject.Day) / mean(Subject.Night) ]	1.01294
Zephyr	HR	Age_group	0.0116856	0.120412	mean(Old) - mean(Young)	-18.0475	mean(Old) / mean(Young)	0.769851
Kubios	Min_HR_(1/min)...WHOLE_DATA...Time-Domain	Time_of_Day	0.0145992	0.138401	mean_across_all_subjects[ mean(Subject.Day) - mean(Subject.Night) ]	6.89359	mean_across_all_subjects[ mean(Subject.Day) / mean(Subject.Night) ]	1.13783
Zephyr	VectorMagnitude	Time_of_Day	0.0145856	0.138401	mean_across_all_subjects[ mean(Subject.Day) - mean(Subject.Night) ]	-0.35944	mean_across_all_subjects[ mean(Subject.Day) / mean(Subject.Night) ]	0.991633
Kubios	Beats_total_(count)...WHOLE_DATA	Time_of_Day	0.0208872	0.190395	mean_across_all_subjects[ mean(Subject.Day) - mean(Subject.Night) ]	34.2474	mean_across_all_subjects[ mean(Subject.Day) / mean(Subject.Night) ]	1.1141
Kubios	EE_activity_(kcal)...WHOLE_DATA...Overview	Time_of_Day	0.0245775	0.213523	mean_across_all_subjects[ mean(Subject.Day) - mean(Subject.Night) ]	-667.914	mean_across_all_subjects[ mean(Subject.Day) / mean(Subject.Night) ]	0.559378
Kubios	Intensity_(TRIMP/min)...WHOLE_DATA...Overview	Time_of_Day	0.0252263	0.213523	mean_across_all_subjects[ mean(Subject.Day) - mean(Subject.Night) ]	0.0813005	mean_across_all_subjects[ mean(Subject.Day) / mean(Subject.Night) ]	5.14406
Kubios	Effective_data_length_(%)...WHOLE_DATA	Time_of_Day	0.0307744	0.227063	mean_across_all_subjects[ mean(Subject.Day) - mean(Subject.Night) ]	-3.22916	mean_across_all_subjects[ mean(Subject.Day) / mean(Subject.Night) ]	0.967241
Kubios	Effective_data_length_(sec)...WHOLE_DATA	Time_of_Day	0.0307898	0.227063	mean_across_all_subjects[ mean(Subject.Day) - mean(Subject.Night) ]	-9.6788	mean_across_all_subjects[ mean(Subject.Day) / mean(Subject.Night) ]	0.967272
Kubios	HF_power_(%)...WHOLE_DATA...Freq-Domain	Age_group:Time_of_Day	0.0323014	0.227063	NA		NA
Kubios	LF/HF_ratio...WHOLE_DATA...Freq-Domain	Time_of_Day	0.0325745	0.227063	mean_across_all_subjects[ mean(Subject.Day) - mean(Subject.Night) ]	-1.00273	mean_across_all_subjects[ mean(Subject.Day) / mean(Subject.Night) ]	1.23434
Kubios	Load_(TRIMP)...WHOLE_DATA...Overview	Time_of_Day	0.0297315	0.227063	mean_across_all_subjects[ mean(Subject.Day) - mean(Subject.Night) ]	-37.2934	mean_across_all_subjects[ mean(Subject.Day) / mean(Subject.Night) ]	0.547704
Zephyr	BRConfidence	Time_of_Day	0.0305587	0.227063	mean_across_all_subjects[ mean(Subject.Day) - mean(Subject.Night) ]	-3.62931	mean_across_all_subjects[ mean(Subject.Day) / mean(Subject.Night) ]	0.941409
Kubios	HF_power_(n.u.)...WHOLE_DATA...Freq-Domain	Age_group:Time_of_Day	0.0348654	0.236089	NA		NA
Kubios	Mean_RR_(ms)...WHOLE_DATA...Time-Domain	Time_of_Day	0.0374073	0.239609	mean_across_all_subjects[ mean(Subject.Day) - mean(Subject.Night) ]	-132.99	mean_across_all_subjects[ mean(Subject.Day) / mean(Subject.Night) ]	0.879794
Kubios	TINN_(ms)...WHOLE_DATA...Time-Domain	Age_group	0.0368236	0.239609	mean(Old) - mean(Young)	-42.3678	mean(Old) / mean(Young)	0.774204
Kubios	Beats_corrected_(count)...WHOLE_DATA	Time_of_Day	0.0444738	0.263648	mean_across_all_subjects[ mean(Subject.Day) - mean(Subject.Night) ]	1.50674	mean_across_all_subjects[ mean(Subject.Day) / mean(Subject.Night) ]	1.86859
Kubios	Stress_index...WHOLE_DATA...Overview	Time_of_Day	0.0450177	0.263648	mean_across_all_subjects[ mean(Subject.Day) - mean(Subject.Night) ]	2.31937	mean_across_all_subjects[ mean(Subject.Day) / mean(Subject.Night) ]	1.22119
Zephyr	BreathingWaveform	Time_of_Day	0.04561	0.263648	mean_across_all_subjects[ mean(Subject.Day) - mean(Subject.Night) ]	116290	mean_across_all_subjects[ mean(Subject.Day) / mean(Subject.Night) ]	1.02312
Zephyr	VectorMagnitude	Age_group	0.0453778	0.263648	mean(Old) - mean(Young)	0.146764	mean(Old) / mean(Young)	1.00345
Kubios	HRVti...WHOLE_DATA...Time-Domain	Time_of_Day	0.0473786	0.267351	mean_across_all_subjects[ mean(Subject.Day) - mean(Subject.Night) ]	-1.18247	mean_across_all_subjects[ mean(Subject.Day) / mean(Subject.Night) ]	0.869079
Kubios	LF_power_(ms^2)...WHOLE_DATA...Freq-Domain	Time_of_Day	0.0566228	0.312084	mean_across_all_subjects[ mean(Subject.Day) - mean(Subject.Night) ]	-215.554	mean_across_all_subjects[ mean(Subject.Day) / mean(Subject.Night) ]	0.888272
Kubios	ApEn...Nonlinear	Age_group:Time_of_Day	0.0804794	0.332813	NA		NA
Kubios	Beats_corrected_(%)...WHOLE_DATA	Time_of_Day	0.0703953	0.332813	mean_across_all_subjects[ mean(Subject.Day) - mean(Subject.Night) ]	0.362397	mean_across_all_subjects[ mean(Subject.Day) / mean(Subject.Night) ]	1.68156
Kubios	LF/HF_ratio...WHOLE_DATA...Freq-Domain	Age_group:Time_of_Day	0.0688615	0.332813	NA		NA
Kubios	Max_HR_(1/min)...WHOLE_DATA...Time-Domain	Age_group	0.0647743	0.332813	mean(Old) - mean(Young)	-23.3168	mean(Old) / mean(Young)	0.744907
Kubios	Mean_HR_(1/min)...WHOLE_DATA...Time-Domain	Age_group	0.0697454	0.332813	mean(Old) - mean(Young)	-16.9804	mean(Old) / mean(Young)	0.779217
Kubios	Mean_RR_(ms)...WHOLE_DATA...Time-Domain	Age_group	0.0775173	0.332813	mean(Old) - mean(Young)	228.732	mean(Old) / mean(Young)	1.27957
Kubios	Min_HR_(1/min)...WHOLE_DATA...Time-Domain	Age_group	0.0814478	0.332813	mean(Old) - mean(Young)	-12.4259	mean(Old) / mean(Young)	0.815821
Kubios	SDNN_(ms)...WHOLE_DATA...Time-Domain	Age_group:Time_of_Day	0.0770691	0.332813	NA		NA
Kubios	VLF_peak_(Hz)...WHOLE_DATA...Freq-Domain	Time_of_Day	0.071455	0.332813	mean_across_all_subjects[ mean(Subject.Day) - mean(Subject.Night) ]	-0.000211216	mean_across_all_subjects[ mean(Subject.Day) / mean(Subject.Night) ]	0.994046
Kubios	VLF_power_(%)...WHOLE_DATA...Freq-Domain	Age_group	0.0739435	0.332813	mean(Old) - mean(Young)	8.86504	mean(Old) / mean(Young)	2.12513
Zephyr	Activity	Age_group:Time_of_Day	0.0740407	0.332813	NA		NA
Zephyr	BRAmplitude	Time_of_Day	0.0627549	0.332813	mean_across_all_subjects[ mean(Subject.Day) - mean(Subject.Night) ]	3090.67	mean_across_all_subjects[ mean(Subject.Day) / mean(Subject.Night) ]	2.26291
Zephyr	ECGAmplitude	Age_group:Time_of_Day	0.0757033	0.332813	NA		NA
Zephyr	HR	Age_group:Time_of_Day	0.0675069	0.332813	NA		NA
Zephyr	PeakAccel	Age_group:Time_of_Day	0.0812127	0.332813	NA		NA
Kubios	HF_power_(ms^2)...WHOLE_DATA...Freq-Domain	Age_group:Time_of_Day	0.0851896	0.336499	NA		NA
Zephyr	Activity	Age_group	0.0839846	0.336499	mean(Old) - mean(Young)	-0.020838	mean(Old) / mean(Young)	0.669971
Kubios	ApEn...Nonlinear	Time_of_Day	0.0886463	0.344413	mean_across_all_subjects[ mean(Subject.Day) - mean(Subject.Night) ]	0.0327552	mean_across_all_subjects[ mean(Subject.Day) / mean(Subject.Night) ]	1.03511
Kubios	HF_power_(ms^2)...WHOLE_DATA...Freq-Domain	Age_group	0.0922425	0.352604	mean(Old) - mean(Young)	-204.398	mean(Old) / mean(Young)	0.495012
Kubios	ACmod_(ms)...WHOLE_DATA...Time-Domain	Time_of_Day	0.100544	0.358861	mean_across_all_subjects[ mean(Subject.Day) - mean(Subject.Night) ]	5.15216	mean_across_all_subjects[ mean(Subject.Day) / mean(Subject.Night) ]	0.873791
Kubios	Beats_total_(count)...WHOLE_DATA	Age_group	0.0960348	0.358861	mean(Old) - mean(Young)	-82.8107	mean(Old) / mean(Young)	0.777862
Kubios	SD2_(ms)...WHOLE_DATA...Nonlinear	Time_of_Day	0.0975337	0.358861	mean_across_all_subjects[ mean(Subject.Day) - mean(Subject.Night) ]	-6.44427	mean_across_all_subjects[ mean(Subject.Day) / mean(Subject.Night) ]	0.877607
Zephyr	HRConfidence	Age_group:Time_of_Day	0.10145	0.358861	NA		NA
Zephyr	PeakAccel	Age_group	0.1006	0.358861	mean(Old) - mean(Young)	-0.0405933	mean(Old) / mean(Young)	0.693611
Kubios	SD2_(ms)...WHOLE_DATA...Nonlinear	Age_group	0.105355	0.367192	mean(Old) - mean(Young)	-9.89432	mean(Old) / mean(Young)	0.769918
Kubios	VLF_power_(ms^2)...WHOLE_DATA...Freq-Domain	Time_of_Day	0.113578	0.390117	mean_across_all_subjects[ mean(Subject.Day) - mean(Subject.Night) ]	-76.3956	mean_across_all_subjects[ mean(Subject.Day) / mean(Subject.Night) ]	0.869743
Kubios	HRVti...WHOLE_DATA...Time-Domain	Age_group	0.115314	0.390422	mean(Old) - mean(Young)	-1.48903	mean(Old) / mean(Young)	0.818544
Kubios	SDNN_(ms)...WHOLE_DATA...Time-Domain	Age_group	0.130992	0.431181	mean(Old) - mean(Young)	-8.11166	mean(Old) / mean(Young)	0.798994
Kubios	TINN_(ms)...WHOLE_DATA...Time-Domain	Time_of_Day	0.129965	0.431181	mean_across_all_subjects[ mean(Subject.Day) - mean(Subject.Night) ]	-16.912	mean_across_all_subjects[ mean(Subject.Day) / mean(Subject.Night) ]	0.918288
ActiWatch	Steps	Age_group:Time_of_Day	0.134962	0.438163	NA		NA
Kubios	AC_(ms)...WHOLE_DATA...Time-Domain	Time_of_Day	0.145277	0.44142	mean_across_all_subjects[ mean(Subject.Day) - mean(Subject.Night) ]	5.41753	mean_across_all_subjects[ mean(Subject.Day) / mean(Subject.Night) ]	0.78517
Kubios	HF_power_(log)...WHOLE_DATA...Freq-Domain	Age_group	0.137836	0.44142	mean(Old) - mean(Young)	-0.840335	mean(Old) / mean(Young)	0.846464
Kubios	LF_peak_(Hz)...WHOLE_DATA...Freq-Domain	Age_group	0.144256	0.44142	mean(Old) - mean(Young)	-0.0176533	mean(Old) / mean(Young)	0.791621
Kubios	SD_HR_(1/min)...WHOLE_DATA...Time-Domain	Age_group:Time_of_Day	0.144657	0.44142	NA		NA
Zephyr	Posture.Original	Age_group	0.14323	0.44142	mean(Old) - mean(Young)	-11.9712	mean(Old) / mean(Young)	8.85566
Kubios	LF_power_(ms^2)...WHOLE_DATA...Freq-Domain	Age_group:Time_of_Day	0.149943	0.449828	NA		NA
Kubios	Intensity_(TRIMP/min)...WHOLE_DATA...Overview	Age_group	0.153771	0.449922	mean(Old) - mean(Young)	-0.104105	mean(Old) / mean(Young)	0.338085
Kubios	SD2/SD1...WHOLE_DATA...Nonlinear	Age_group:Time_of_Day	0.152613	0.449922	NA		NA
Kubios	LF_peak_(Hz)...WHOLE_DATA...Freq-Domain	Time_of_Day	0.158488	0.452551	mean_across_all_subjects[ mean(Subject.Day) - mean(Subject.Night) ]	0.00468713	mean_across_all_subjects[ mean(Subject.Day) / mean(Subject.Night) ]	1.08803
Kubios	VLF_power_(ms^2)...WHOLE_DATA...Freq-Domain	Age_group:Time_of_Day	0.157431	0.452551	NA		NA
ActiWatch	Steps	Age_group	0.163749	0.456572	mean(Old) - mean(Young)	-1.19364	mean(Old) / mean(Young)	0.825595
Kubios	DCmod_(ms)...WHOLE_DATA...Time-Domain	Time_of_Day	0.163284	0.456572	mean_across_all_subjects[ mean(Subject.Day) - mean(Subject.Night) ]	-4.42166	mean_across_all_subjects[ mean(Subject.Day) / mean(Subject.Night) ]	0.902002
Kubios	RESP_(Hz)...WHOLE_DATA...Freq-Domain	Time_of_Day	0.166325	0.458362	mean_across_all_subjects[ mean(Subject.Day) - mean(Subject.Night) ]	0.0478192	mean_across_all_subjects[ mean(Subject.Day) / mean(Subject.Night) ]	1.24547
Kubios	LF_power_(ms^2)...WHOLE_DATA...Freq-Domain	Age_group	0.168894	0.46009	mean(Old) - mean(Young)	-275.369	mean(Old) / mean(Young)	0.64774
Kubios	VLF_power_(log)...WHOLE_DATA...Freq-Domain	Age_group:Time_of_Day	0.178605	0.481015	NA		NA
Kubios	SD_HR_(1/min)...WHOLE_DATA...Time-Domain	Time_of_Day	0.181162	0.482421	mean_across_all_subjects[ mean(Subject.Day) - mean(Subject.Night) ]	0.382223	mean_across_all_subjects[ mean(Subject.Day) / mean(Subject.Night) ]	1.16919
Zephyr	CoreTemp	Age_group	0.185317	0.482638	mean(Old) - mean(Young)	-2.03358	mean(Old) / mean(Young)	0.948913
Zephyr	CoreTemp	Age_group:Time_of_Day	0.185049	0.482638	NA		NA
ActiWatch	Axis3	Age_group:Time_of_Day	0.197738	0.498552	NA		NA
Kubios	LF_power_(log)...WHOLE_DATA...Freq-Domain	Time_of_Day	0.196032	0.498552	mean_across_all_subjects[ mean(Subject.Day) - mean(Subject.Night) ]	-0.31796	mean_across_all_subjects[ mean(Subject.Day) / mean(Subject.Night) ]	0.956028
Kubios	Load_(TRIMP)...WHOLE_DATA...Overview	Age_group	0.194699	0.498552	mean(Old) - mean(Young)	-38.6816	mean(Old) / mean(Young)	0.425429
Kubios	DFA_a1...Nonlinear	Age_group:Time_of_Day	0.205095	0.511657	NA		NA
Kubios	Load_(TRIMP)...WHOLE_DATA...Overview	Age_group:Time_of_Day	0.207816	0.513047	NA		NA
Kubios	DC_(ms)...WHOLE_DATA...Time-Domain	Age_group	0.217938	0.532488	mean(Old) - mean(Young)	-6.77089	mean(Old) / mean(Young)	0.639312
ActiWatch	Axis1	Age_group	0.230293	0.5395	mean(Old) - mean(Young)	-115.857	mean(Old) / mean(Young)	0.83599
Kubios	AC_(ms)...WHOLE_DATA...Time-Domain	Age_group	0.233398	0.5395	mean(Old) - mean(Young)	6.42068	mean(Old) / mean(Young)	0.645002
Kubios	LF_power_(log)...WHOLE_DATA...Freq-Domain	Age_group	0.233913	0.5395	mean(Old) - mean(Young)	-0.541682	mean(Old) / mean(Young)	0.911033
Kubios	LF_power_(log)...WHOLE_DATA...Freq-Domain	Age_group:Time_of_Day	0.223835	0.5395	NA		NA
Kubios	RMSSD_(ms)...WHOLE_DATA...Time-Domain	Time_of_Day	0.234466	0.5395	mean_across_all_subjects[ mean(Subject.Day) - mean(Subject.Night) ]	-3.58799	mean_across_all_subjects[ mean(Subject.Day) / mean(Subject.Night) ]	0.914556
Kubios	SD1_(ms)...WHOLE_DATA...Nonlinear	Time_of_Day	0.233859	0.5395	mean_across_all_subjects[ mean(Subject.Day) - mean(Subject.Night) ]	-2.54347	mean_across_all_subjects[ mean(Subject.Day) / mean(Subject.Night) ]	0.914432
Kubios	VLF_power_(log)...WHOLE_DATA...Freq-Domain	Time_of_Day	0.240101	0.547152	mean_across_all_subjects[ mean(Subject.Day) - mean(Subject.Night) ]	-0.347452	mean_across_all_subjects[ mean(Subject.Day) / mean(Subject.Night) ]	0.967052
Kubios	Beats_corrected_(count)...WHOLE_DATA	Age_group:Time_of_Day	0.244877	0.548172	NA		NA
Kubios	HF_power_(log)...WHOLE_DATA...Freq-Domain	Time_of_Day	0.245174	0.548172	mean_across_all_subjects[ mean(Subject.Day) - mean(Subject.Night) ]	-0.357847	mean_across_all_subjects[ mean(Subject.Day) / mean(Subject.Night) ]	0.941931
ActiWatch	Axis1	Age_group:Time_of_Day	0.251053	0.551372	NA		NA
ActiWatch	Vector.Magnitude	Age_group:Time_of_Day	0.251258	0.551372	NA		NA
Kubios	LF_power_(%)...WHOLE_DATA...Freq-Domain	Age_group:Time_of_Day	0.258369	0.561776	NA		NA
Kubios	SD2_(ms)...WHOLE_DATA...Nonlinear	Age_group:Time_of_Day	0.262183	0.564886	NA		NA
ActiWatch	Vector.Magnitude	Age_group	0.26626	0.566344	mean(Old) - mean(Young)	-188.282	mean(Old) / mean(Young)	0.856313
Kubios	LF_power_(n.u.)...WHOLE_DATA...Freq-Domain	Age_group:Time_of_Day	0.26764	0.566344	NA		NA
ActiWatch	Axis3	Age_group	0.271287	0.568983	mean(Old) - mean(Young)	-107.65	mean(Old) / mean(Young)	0.858667
Kubios	DC_(ms)...WHOLE_DATA...Time-Domain	Time_of_Day	0.278133	0.578225	mean_across_all_subjects[ mean(Subject.Day) - mean(Subject.Night) ]	-4.87586	mean_across_all_subjects[ mean(Subject.Day) / mean(Subject.Night) ]	0.838377
Kubios	pNNxx_(%)...WHOLE_DATA...Time-Domain	Time_of_Day	0.297306	0.605012	mean_across_all_subjects[ mean(Subject.Day) - mean(Subject.Night) ]	-2.76972	mean_across_all_subjects[ mean(Subject.Day) / mean(Subject.Night) ]	0.865443
Kubios	SampEn...Nonlinear	Age_group:Time_of_Day	0.29671	0.605012	NA		NA
Zephyr	SagittalMin	Age_group	0.298677	0.605012	mean(Old) - mean(Young)	0.12411	mean(Old) / mean(Young)	-1.62536
ActiWatch	Axis2	Age_group:Time_of_Day	0.3086	0.619815	NA		NA
Kubios	TINN_(ms)...WHOLE_DATA...Time-Domain	Age_group:Time_of_Day	0.311697	0.620775	NA		NA
Kubios	HRVti...WHOLE_DATA...Time-Domain	Age_group:Time_of_Day	0.315815	0.623735	NA		NA
Kubios	HF_power_(ms^2)...WHOLE_DATA...Freq-Domain	Time_of_Day	0.321773	0.63025	mean_across_all_subjects[ mean(Subject.Day) - mean(Subject.Night) ]	-101.34	mean_across_all_subjects[ mean(Subject.Day) / mean(Subject.Night) ]	0.900421
Kubios	SNS_index...WHOLE_DATA...Overview	Age_group	0.325486	0.632297	mean(Old) - mean(Young)	-0.98105	mean(Old) / mean(Young)	0.234398
Zephyr	Posture	Age_group	0.329691	0.635259	mean(Old) - mean(Young)	5.30549	mean(Old) / mean(Young)	1.13999
Zephyr	VerticalMin	Age_group	0.334122	0.638604	mean(Old) - mean(Young)	0.0795697	mean(Old) / mean(Young)	0.890261
Kubios	Stress_index...WHOLE_DATA...Overview	Age_group:Time_of_Day	0.338929	0.64261	NA		NA
ActiWatch	Axis2	Age_group	0.348662	0.646769	mean(Old) - mean(Young)	-92.7177	mean(Old) / mean(Young)	0.870245
Kubios	HF_power_(%)...WHOLE_DATA...Freq-Domain	Age_group	0.349152	0.646769	mean(Old) - mean(Young)	-5.83269	mean(Old) / mean(Young)	0.772202
Kubios	LF/HF_ratio...WHOLE_DATA...Freq-Domain	Age_group	0.34931	0.646769	mean(Old) - mean(Young)	1.71701	mean(Old) / mean(Young)	1.53098
Zephyr	SagittalPeak	Time_of_Day	0.354253	0.650837	mean_across_all_subjects[ mean(Subject.Day) - mean(Subject.Night) ]	-0.0237877	mean_across_all_subjects[ mean(Subject.Day) / mean(Subject.Night) ]	-0.00945402
Zephyr	ECGAmplitude	Time_of_Day	0.35833	0.651367	mean_across_all_subjects[ mean(Subject.Day) - mean(Subject.Night) ]	0.000210699	mean_across_all_subjects[ mean(Subject.Day) / mean(Subject.Night) ]	1.26335
Zephyr	HRV	Age_group:Time_of_Day	0.360038	0.651367	NA		NA
Kubios	Intensity_(TRIMP/min)...WHOLE_DATA...Overview	Age_group:Time_of_Day	0.367916	0.660577	NA		NA
Zephyr	LateralMin	Time_of_Day	0.376375	0.665678	mean_across_all_subjects[ mean(Subject.Day) - mean(Subject.Night) ]	-0.10535	mean_across_all_subjects[ mean(Subject.Day) / mean(Subject.Night) ]	11.8633
Zephyr	Sagittal	Age_group	0.374985	0.665678	mean(Old) - mean(Young)	0.106544	mean(Old) / mean(Young)	1.00431
Zephyr	BRAmplitude	Age_group	0.381868	0.670391	mean(Old) - mean(Young)	5508.76	mean(Old) / mean(Young)	3.1018
Kubios	VLF_peak_(Hz)...WHOLE_DATA...Freq-Domain	Age_group:Time_of_Day	0.388692	0.677353	NA		NA
Kubios	NNxx_(count)...WHOLE_DATA...Time-Domain	Time_of_Day	0.405064	0.689881	mean_across_all_subjects[ mean(Subject.Day) - mean(Subject.Night) ]	-6.16341	mean_across_all_subjects[ mean(Subject.Day) / mean(Subject.Night) ]	0.939767
Kubios	PNS_index...WHOLE_DATA...Overview	Age_group	0.40676	0.689881	mean(Old) - mean(Young)	0.835449	mean(Old) / mean(Young)	-1.25388
Kubios	VLF_power_(%)...WHOLE_DATA...Freq-Domain	Time_of_Day	0.404012	0.689881	mean_across_all_subjects[ mean(Subject.Day) - mean(Subject.Night) ]	-1.39266	mean_across_all_subjects[ mean(Subject.Day) / mean(Subject.Night) ]	1.09398
Zephyr	BRAmplitude	Age_group:Time_of_Day	0.407525	0.689881	NA		NA
Kubios	Effective_data_length_(%)...WHOLE_DATA	Age_group:Time_of_Day	0.417932	0.692666	NA		NA
Kubios	Effective_data_length_(sec)...WHOLE_DATA	Age_group:Time_of_Day	0.417938	0.692666	NA		NA
Kubios	SampEn...Nonlinear	Age_group	0.415573	0.692666	mean(Old) - mean(Young)	0.229138	mean(Old) / mean(Young)	1.18999
Zephyr	BR	Age_group	0.430888	0.70917	mean(Old) - mean(Young)	6.6953	mean(Old) / mean(Young)	1.30313
Zephyr	SagittalPeak	Age_group	0.449024	0.733922	mean(Old) - mean(Young)	0.0896819	mean(Old) / mean(Young)	1.95716
Zephyr	LateralMin	Age_group	0.454164	0.737238	mean(Old) - mean(Young)	0.111576	mean(Old) / mean(Young)	2.05535
Kubios	DCmod_(ms)...WHOLE_DATA...Time-Domain	Age_group:Time_of_Day	0.45857	0.738691	NA		NA
Kubios	VLF_power_(%)...WHOLE_DATA...Freq-Domain	Age_group:Time_of_Day	0.462819	0.738691	NA		NA
Zephyr	BreathingWaveform	Age_group	0.464409	0.738691	mean(Old) - mean(Young)	257238	mean(Old) / mean(Young)	1.0448
Zephyr	HRConfidence	Time_of_Day	0.476328	0.747615	mean_across_all_subjects[ mean(Subject.Day) - mean(Subject.Night) ]	0.217765	mean_across_all_subjects[ mean(Subject.Day) / mean(Subject.Night) ]	1.00338
Zephyr	Vertical	Age_group	0.473679	0.747615	mean(Old) - mean(Young)	0.0497604	mean(Old) / mean(Young)	1.00207
Kubios	NNxx_(count)...WHOLE_DATA...Time-Domain	Age_group	0.480373	0.749002	mean(Old) - mean(Young)	-31.8751	mean(Old) / mean(Young)	0.587919
Kubios	LF_peak_(Hz)...WHOLE_DATA...Freq-Domain	Age_group:Time_of_Day	0.491374	0.756206	NA		NA
Zephyr	Posture.Original	Age_group:Time_of_Day	0.489474	0.756206	NA		NA
Kubios	Mean_RR_(ms)...WHOLE_DATA...Time-Domain	Age_group:Time_of_Day	0.503291	0.769548	NA		NA
Kubios	HF_peak_(Hz)...WHOLE_DATA...Freq-Domain	Age_group:Time_of_Day	0.520204	0.770552	NA		NA
Kubios	HF_power_(n.u.)...WHOLE_DATA...Freq-Domain	Age_group	0.510794	0.770552	mean(Old) - mean(Young)	-4.16274	mean(Old) / mean(Young)	0.84891
Kubios	LF_power_(n.u.)...WHOLE_DATA...Freq-Domain	Time_of_Day	0.516855	0.770552	mean_across_all_subjects[ mean(Subject.Day) - mean(Subject.Night) ]	-1.0474	mean_across_all_subjects[ mean(Subject.Day) / mean(Subject.Night) ]	1.0559
Kubios	PNS_index...WHOLE_DATA...Overview	Age_group:Time_of_Day	0.513158	0.770552	NA		NA
Zephyr	Sagittal	Time_of_Day	0.517833	0.770552	mean_across_all_subjects[ mean(Subject.Day) - mean(Subject.Night) ]	-0.0559508	mean_across_all_subjects[ mean(Subject.Day) / mean(Subject.Night) ]	0.997953
Kubios	Beats_corrected_(%)...WHOLE_DATA	Age_group:Time_of_Day	0.529078	0.774022	NA		NA
Zephyr	Lateral	Age_group	0.526144	0.774022	mean(Old) - mean(Young)	0.0962191	mean(Old) / mean(Young)	1.00387
Kubios	RESP_(Hz)...WHOLE_DATA...Freq-Domain	Age_group:Time_of_Day	0.547036	0.795384	NA		NA
Kubios	ACmod_(ms)...WHOLE_DATA...Time-Domain	Age_group	0.56128	0.806203	mean(Old) - mean(Young)	9.27293	mean(Old) / mean(Young)	0.789295
Kubios	Max_HR_(1/min)...WHOLE_DATA...Time-Domain	Age_group:Time_of_Day	0.56071	0.806203	NA		NA
Zephyr	Lateral	Time_of_Day	0.564957	0.806596	mean_across_all_subjects[ mean(Subject.Day) - mean(Subject.Night) ]	-0.0702981	mean_across_all_subjects[ mean(Subject.Day) / mean(Subject.Night) ]	0.997301
Kubios	SD2/SD1...WHOLE_DATA...Nonlinear	Time_of_Day	0.58488	0.825099	mean_across_all_subjects[ mean(Subject.Day) - mean(Subject.Night) ]	0.00289701	mean_across_all_subjects[ mean(Subject.Day) / mean(Subject.Night) ]	1.03049
Kubios	VLF_power_(ms^2)...WHOLE_DATA...Freq-Domain	Age_group	0.583012	0.825099	mean(Old) - mean(Young)	32.3664	mean(Old) / mean(Young)	1.29989
Kubios	HF_peak_(Hz)...WHOLE_DATA...Freq-Domain	Age_group	0.590368	0.827912	mean(Old) - mean(Young)	0.014583	mean(Old) / mean(Young)	1.06573
Kubios	DC_(ms)...WHOLE_DATA...Time-Domain	Age_group:Time_of_Day	0.61877	0.83323	NA		NA
Kubios	DCmod_(ms)...WHOLE_DATA...Time-Domain	Age_group	0.60067	0.83323	mean(Old) - mean(Young)	-8.44676	mean(Old) / mean(Young)	0.805736
Kubios	LF_power_(n.u.)...WHOLE_DATA...Freq-Domain	Age_group	0.605727	0.83323	mean(Old) - mean(Young)	9.68278	mean(Old) / mean(Young)	1.16158
Kubios	pNNxx_(%)...WHOLE_DATA...Time-Domain	Age_group	0.612739	0.83323	mean(Old) - mean(Young)	-7.99048	mean(Old) / mean(Young)	0.68578
Zephyr	BR	Time_of_Day	0.611802	0.83323	mean_across_all_subjects[ mean(Subject.Day) - mean(Subject.Night) ]	-32.49	mean_across_all_subjects[ mean(Subject.Day) / mean(Subject.Night) ]	1.45179
Zephyr	LateralPeak	Age_group	0.605686	0.83323	mean(Old) - mean(Young)	0.0789707	mean(Old) / mean(Young)	1.31703
Zephyr	SagittalPeak	Age_group:Time_of_Day	0.617744	0.83323	NA		NA
Kubios	EE_activity_(kcal)...WHOLE_DATA...Overview	Age_group	0.631272	0.845262	mean(Old) - mean(Young)	283.788	mean(Old) / mean(Young)	1.33234
Kubios	ACmod_(ms)...WHOLE_DATA...Time-Domain	Age_group:Time_of_Day	0.639435	0.846626	NA		NA
Kubios	Beats_total_(count)...WHOLE_DATA	Age_group:Time_of_Day	0.637586	0.846626	NA		NA
Kubios	HF_power_(n.u.)...WHOLE_DATA...Freq-Domain	Time_of_Day	0.652818	0.854719	mean_across_all_subjects[ mean(Subject.Day) - mean(Subject.Night) ]	-2.32113	mean_across_all_subjects[ mean(Subject.Day) / mean(Subject.Night) ]	1.07598
Kubios	RMSSD_(ms)...WHOLE_DATA...Time-Domain	Age_group	0.659383	0.854719	mean(Old) - mean(Young)	-7.58161	mean(Old) / mean(Young)	0.827827
Kubios	SD1_(ms)...WHOLE_DATA...Nonlinear	Age_group	0.659973	0.854719	mean(Old) - mean(Young)	-5.36061	mean(Old) / mean(Young)	0.828118
Zephyr	BR	Age_group:Time_of_Day	0.65262	0.854719	NA		NA
Zephyr	ECGNoise	Age_group:Time_of_Day	0.677737	0.872955	NA		NA
Kubios	Stress_index...WHOLE_DATA...Overview	Age_group	0.682495	0.874332	mean(Old) - mean(Young)	0.911272	mean(Old) / mean(Young)	1.06935
Zephyr	ECGNoise	Age_group	0.691031	0.877659	mean(Old) - mean(Young)	-8.71014e-06	mean(Old) / mean(Young)	0.913188
Zephyr	Sagittal	Age_group:Time_of_Day	0.692499	0.877659	NA		NA
Kubios	Beats_corrected_(count)...WHOLE_DATA	Age_group	0.743265	0.887949	mean(Old) - mean(Young)	-0.509502	mean(Old) / mean(Young)	0.850181
Kubios	EE_activity_(kcal)...WHOLE_DATA...Overview	Age_group:Time_of_Day	0.738207	0.887949	NA		NA
Kubios	HF_power_(%)...WHOLE_DATA...Freq-Domain	Time_of_Day	0.7116	0.887949	mean_across_all_subjects[ mean(Subject.Day) - mean(Subject.Night) ]	-2.34258	mean_across_all_subjects[ mean(Subject.Day) / mean(Subject.Night) ]	1.11029
Kubios	Min_HR_(1/min)...WHOLE_DATA...Time-Domain	Age_group:Time_of_Day	0.740676	0.887949	NA		NA
Kubios	RMSSD_(ms)...WHOLE_DATA...Time-Domain	Age_group:Time_of_Day	0.734611	0.887949	NA		NA
Kubios	SD1_(ms)...WHOLE_DATA...Nonlinear	Age_group:Time_of_Day	0.734741	0.887949	NA		NA
Kubios	VLF_peak_(Hz)...WHOLE_DATA...Freq-Domain	Age_group	0.71394	0.887949	mean(Old) - mean(Young)	0.000142984	mean(Old) / mean(Young)	1.00406
Zephyr	ECGAmplitude	Age_group	0.745577	0.887949	mean(Old) - mean(Young)	-0.000196961	mean(Old) / mean(Young)	0.877725
Zephyr	LateralMin	Age_group:Time_of_Day	0.719143	0.887949	NA		NA
Zephyr	SagittalMin	Time_of_Day	0.726451	0.887949	mean_across_all_subjects[ mean(Subject.Day) - mean(Subject.Night) ]	-0.08852	mean_across_all_subjects[ mean(Subject.Day) / mean(Subject.Night) ]	0.762604
Zephyr	VerticalMin	Age_group:Time_of_Day	0.73746	0.887949	NA		NA
Zephyr	VerticalPeak	Age_group	0.715254	0.887949	mean(Old) - mean(Young)	0.0230267	mean(Old) / mean(Young)	0.957905
Zephyr	BRConfidence	Age_group	0.758045	0.889389	mean(Old) - mean(Young)	-5.26382	mean(Old) / mean(Young)	0.940766
Zephyr	BreathingWaveform	Age_group:Time_of_Day	0.755517	0.889389	NA		NA
Zephyr	HRConfidence	Age_group	0.750894	0.889389	mean(Old) - mean(Young)	-1.02471	mean(Old) / mean(Young)	0.989305
ActiWatch	Lux	Age_group	0.771677	0.895545	mean(Old) - mean(Young)	-5.52524	mean(Old) / mean(Young)	0.895076
Kubios	HF_power_(log)...WHOLE_DATA...Freq-Domain	Age_group:Time_of_Day	0.785474	0.895545	NA		NA
Kubios	SNS_index...WHOLE_DATA...Overview	Age_group:Time_of_Day	0.79193	0.895545	NA		NA
Kubios	VLF_power_(log)...WHOLE_DATA...Freq-Domain	Age_group	0.773675	0.895545	mean(Old) - mean(Young)	0.206844	mean(Old) / mean(Young)	1.05486
Zephyr	HRV	Time_of_Day	0.784605	0.895545	mean_across_all_subjects[ mean(Subject.Day) - mean(Subject.Night) ]	-302.574	mean_across_all_subjects[ mean(Subject.Day) / mean(Subject.Night) ]	2.92951
Zephyr	Lateral	Age_group:Time_of_Day	0.793521	0.895545	NA		NA
Zephyr	LateralPeak	Time_of_Day	0.778807	0.895545	mean_across_all_subjects[ mean(Subject.Day) - mean(Subject.Night) ]	-0.0388739	mean_across_all_subjects[ mean(Subject.Day) / mean(Subject.Night) ]	0.465555
Zephyr	SagittalMin	Age_group:Time_of_Day	0.787501	0.895545	NA		NA
Kubios	EE_activity_(kcal/min)...WHOLE_DATA...Overview	Age_group:Time_of_Day	0.801159	0.89988	NA		NA
Kubios	DFA_a1...Nonlinear	Time_of_Day	0.815881	0.903748	mean_across_all_subjects[ mean(Subject.Day) - mean(Subject.Night) ]	0.0191082	mean_across_all_subjects[ mean(Subject.Day) / mean(Subject.Night) ]	1.04925
Kubios	LF_power_(%)...WHOLE_DATA...Freq-Domain	Time_of_Day	0.817249	0.903748	mean_across_all_subjects[ mean(Subject.Day) - mean(Subject.Night) ]	1.07179	mean_across_all_subjects[ mean(Subject.Day) / mean(Subject.Night) ]	1.06952
Kubios	Mean_HR_(1/min)...WHOLE_DATA...Time-Domain	Age_group:Time_of_Day	0.814469	0.903748	NA		NA
Zephyr	Posture.Original	Time_of_Day	0.819855	0.903748	mean_across_all_subjects[ mean(Subject.Day) - mean(Subject.Night) ]	6.49398	mean_across_all_subjects[ mean(Subject.Day) / mean(Subject.Night) ]	-0.563505
Kubios	AC_(ms)...WHOLE_DATA...Time-Domain	Age_group:Time_of_Day	0.833056	0.909835	NA		NA
Kubios	Beats_corrected_(%)...WHOLE_DATA	Age_group	0.83115	0.909835	mean(Old) - mean(Young)	0.0897665	mean(Old) / mean(Young)	1.09878
ActiWatch	Lux	Age_group:Time_of_Day	0.843643	0.917172	NA		NA
Kubios	Effective_data_length_(%)...WHOLE_DATA	Age_group	0.883205	0.934463	mean(Old) - mean(Young)	-0.270507	mean(Old) / mean(Young)	0.997214
Kubios	Effective_data_length_(sec)...WHOLE_DATA	Age_group	0.88307	0.934463	mean(Old) - mean(Young)	-0.811667	mean(Old) / mean(Young)	0.997214
Kubios	HF_peak_(Hz)...WHOLE_DATA...Freq-Domain	Time_of_Day	0.876747	0.934463	mean_across_all_subjects[ mean(Subject.Day) - mean(Subject.Night) ]	-0.00492877	mean_across_all_subjects[ mean(Subject.Day) / mean(Subject.Night) ]	0.994832
Zephyr	HRV	Age_group	0.877159	0.934463	mean(Old) - mean(Young)	46.958	mean(Old) / mean(Young)	1.10834
Zephyr	LateralPeak	Age_group:Time_of_Day	0.879075	0.934463	NA		NA
Zephyr	VerticalPeak	Age_group:Time_of_Day	0.876409	0.934463	NA		NA
Kubios	ApEn...Nonlinear	Age_group	0.911688	0.947675	mean(Old) - mean(Young)	0.0148636	mean(Old) / mean(Young)	1.01568
Kubios	DFA_a1...Nonlinear	Age_group	0.911617	0.947675	mean(Old) - mean(Young)	0.0327821	mean(Old) / mean(Young)	1.03016
Kubios	SD2/SD1...WHOLE_DATA...Nonlinear	Age_group	0.907468	0.947675	mean(Old) - mean(Young)	-0.0862577	mean(Old) / mean(Young)	0.96096
Zephyr	Posture	Age_group:Time_of_Day	0.906572	0.947675	NA		NA
Kubios	SampEn...Nonlinear	Time_of_Day	0.920202	0.952348	mean_across_all_subjects[ mean(Subject.Day) - mean(Subject.Night) ]	-0.0491352	mean_across_all_subjects[ mean(Subject.Day) / mean(Subject.Night) ]	0.993894
Kubios	LF_power_(%)...WHOLE_DATA...Freq-Domain	Age_group	0.928156	0.95387	mean(Old) - mean(Young)	1.36853	mean(Old) / mean(Young)	1.02541
Zephyr	BRConfidence	Age_group:Time_of_Day	0.929721	0.95387	NA		NA
Zephyr	Vertical	Age_group:Time_of_Day	0.943317	0.963647	NA		NA
Kubios	pNNxx_(%)...WHOLE_DATA...Time-Domain	Age_group:Time_of_Day	0.950763	0.967085	NA		NA
Zephyr	VectorMagnitude	Age_group:Time_of_Day	0.960663	0.972979	NA		NA
Kubios	RESP_(Hz)...WHOLE_DATA...Freq-Domain	Age_group	0.965268	0.973483	mean(Old) - mean(Young)	0.00200708	mean(Old) / mean(Young)	1.00618
Kubios	NNxx_(count)...WHOLE_DATA...Time-Domain	Age_group:Time_of_Day	0.970872	0.974986	NA		NA
Kubios	EE_activity_(kcal/min)...WHOLE_DATA...Overview	Age_group	0.995779	0.995779	mean(Old) - mean(Young)	-0.00734767	mean(Old) / mean(Young)	0.996596
