# Supplementary material for: Evidence for a role of human blood-borne factors in mediating age-associated changes in molecular circadian rhythms
Source: eLife. 2024 Nov 1;12:RP88322. doi: 10.7554/eLife.88322 (PMC11530234; doi:10.7554/eLife.88322)
Supplement: Figure 2—figure supplement 1—source data 1. [file elife-88322-fig2-figsupp1-data1.xlsx]

## Sheet: Amplitude
	Experiment 1-rep 1	Experiment 1-rep 2	Experiment 1-rep 3	Experiment 2- rep 1	Experiment 2- rep 2	Experiment 2- rep 3	Experiment 3-rep 1	Experiment 3- rep 2	Experiment 3- rep 3
Young 1 (Male)	884	1015	980				1236	1232	1123
Young 2 (Female)	1125	1426	1113				1580	2237	2030
Young 3 (Female)				503	658	576	1097	992	1097
Young 4 (Male)	829	1152	855				1097	1008	1569
Young 5 (Female)				628	751	772	1160	1187	1002
Young 6 (Male)				937	1228	1198	2123	2523	2335
Young 7 (Male)				720	730		1901	1916	1783
Old 1 (Male)	930	1054	1260				1138	1400	1325
Old 2 (Female)	848	1088	1208				1409	1707	1617
Old 3 (Female)				564	645	586	1282	1675	1754
Old 4 (Male)				718	793	757	1481	1528	1524
Old 5 (Female)				769	789		1389	1489	1411
Old 6 (Male)				823	838	920	1733	2210	1923
Old 7 (Male)				449.6	512	478.9	1471	1574	1839
Old 8 (Male)				669	918	1101	2422	2391	2648

## Sheet: Period
	Experiment 1-rep 1	Experiment 1-rep 2	Experiment 1-rep 3	Experiment 2- rep 1	Experiment 2- rep 2	Experiment 2- rep 3	Experiment 3-rep 1	Experiment 3- rep 2	Experiment 3- rep 3
Young 1 (Male)	24.67	24.41	23.78				21.68	21.46	21.45
Young 2 (Female)	23.3	22.94	22.62				21.62	21.59	21.9
Young 3 (Female)				23.9	23.52	23.31	21.31	21.51	21.35
Young 4 (Male)	22.5	22.33	22.94				21.03	20.78	21.38
Young 5 (Female)				24.67	24.55	24.17	21.47	21.48	21.68
Young 6 (Male)				24.65	24.64	23.77	22.19	22.26	22.38
Young 7 (Male)				24.55	23.89		21.65	21.77	21.68
Old 1 (Male)	24.55	24.3	23.15				22.17	22.23	22.06
Old 2 (Female)	23.34	23.24	23				21.97	21.93	21.9
Old 3 (Female)				24.51	24.59	24.76	22.01	22.11	21.87
Old 4 (Male)				24.02	24.76	24.08	21.72	22.22	21.93
Old 5 (Female)				24.81	23.97		22.01	21.96	21.97
Old 6 (Male)				23.31	23.02	23.55	21.94	21.86	21.88
Old 7 (Male)				24.83	25.27	24.7	22.34	21.95	22.04
Old 8 (Male)				23.47	22.98	22.48	22.15	22.01	22.51

## Sheet: Phase
	Experiment 1-rep 1	Experiment 1-rep 2	Experiment 1-rep 3	Experiment 2- rep 1	Experiment 2- rep 2	Experiment 2- rep 3	Experiment 3-rep 1	Experiment 3- rep 2	Experiment 3- rep 3
Young 1 (Male)	13.92	15.21	17.08				19	19.96	20.32
Young 2 (Female)	17.87	18.65	19.15				20.88	20.38	20.23
Young 3 (Female)				15.28	15.64	16.37	20.99	19.88	20.11
Young 4 (Male)	20	19.53	19.43				21.74	22.19	20.34
Young 5 (Female)				14.38	14.77	15.3	19.64	19.73	19.01
Young 6 (Male)				13.25	13.11	14.94	17.36	17.15	16.92
Young 7 (Male)				14.05	15.94		19.67	19.3	19.46
Old 1 (Male)	13.79	14.53	17.3				17.62	17.41	17.7
Old 2 (Female)	16.65	16.92	17.54				17.75	17.9	18.02
Old 3 (Female)				13.91	13.74	13.25	18.92	18.85	18.86
Old 4 (Male)				14.58	12.47	13.96	18.63	18.37	18.66
Old 5 (Female)				13.2	14.76		17.95	17.69	17.45
Old 6 (Male)				17.83	18.16	16.67	20.41	20.37	20.44
Old 7 (Male)				13.45	12.25	13.87	17.91	18.4	17.98
Old 8 (Male)				17.54	18.05	18.35	19.51	19.71	19.02
