# Supplementary material for: Evidence for a role of human blood-borne factors in mediating age-associated changes in molecular circadian rhythms
Source: eLife. 2024 Nov 1;12:RP88322. doi: 10.7554/eLife.88322 (PMC11530234; doi:10.7554/eLife.88322)
Supplement: Figure 3—figure supplement 1—source data 1. [file elife-88322-fig3-figsupp1-data1.xlsx]

## Sheet: Input MESOR diff among cyclers
Gene pre-filtered for those cycling in both age groups (CircaCompare rhythmic q < 0.05 in old, CircaCompare rhythmic q < 0.05 in young)
Gene	MESOR_diff_q_value	MESOR_diff (Old - Young)
ENSG00000104312	2.25317e-11	-0.0560703
ENSG00000257923	4.32317e-11	0.0434188
ENSG00000176046	6.13196e-11	0.175658
ENSG00000172379	5.68917e-10	0.228296
ENSG00000167005	1.51445e-09	-0.0437994
ENSG00000113716	2.53321e-09	-0.0348785
ENSG00000178966	2.58811e-09	-0.0682596
ENSG00000119969	4.59868e-09	-0.111488
ENSG00000122376	3.21382e-08	-0.0513678
ENSG00000138346	4.81047e-08	-0.125023
ENSG00000135218	7.24721e-08	0.262121
ENSG00000198056	7.92261e-08	-0.115158
ENSG00000140941	1.34297e-07	0.0271331
ENSG00000092201	1.56383e-07	-0.0510364
ENSG00000141682	3.00803e-07	-0.0833143
ENSG00000154265	3.43815e-07	0.108056
ENSG00000162650	4.04838e-07	0.163814
ENSG00000092199	4.69699e-07	-0.0372131
ENSG00000132196	4.96581e-07	0.157914
ENSG00000103888	7.45975e-07	0.333598
ENSG00000156017	9.19192e-07	-0.0636945
ENSG00000100714	1.01669e-06	-0.0644175
ENSG00000132436	1.01669e-06	-0.0978249
ENSG00000183775	1.239e-06	0.192721
ENSG00000196616	2.16229e-06	0.641872
ENSG00000172059	3.19281e-06	0.0801082
ENSG00000168496	3.24092e-06	-0.11201
ENSG00000073111	3.49397e-06	-0.111347
ENSG00000080345	3.49397e-06	-0.0463754
ENSG00000143942	3.49397e-06	-0.125989
ENSG00000177302	3.67905e-06	-0.0512297
ENSG00000134690	4.37237e-06	-0.0958426
ENSG00000031691	4.68618e-06	-0.0884374
ENSG00000126215	6.52864e-06	-0.0914836
ENSG00000189057	7.61548e-06	-0.113712
ENSG00000105655	1.08221e-05	0.0948686
ENSG00000100479	1.10986e-05	-0.11121
ENSG00000157514	1.16274e-05	0.149305
ENSG00000105011	1.27985e-05	-0.0959915
ENSG00000175063	1.99207e-05	-0.0851496
ENSG00000184897	2.09457e-05	-0.0419485
ENSG00000198001	2.09457e-05	0.0465562
ENSG00000274605	2.35655e-05	-0.0943005
ENSG00000118513	3.32388e-05	-0.155732
ENSG00000166046	4.86892e-05	0.174937
ENSG00000091127	4.974e-05	-0.052503
ENSG00000213190	5.96091e-05	-0.0705693
ENSG00000091490	6.30239e-05	0.0878529
ENSG00000091592	6.48685e-05	0.0628149
ENSG00000107890	7.85466e-05	-0.043065
ENSG00000196507	9.0122e-05	0.0529194
ENSG00000179862	9.11067e-05	-0.138771
ENSG00000164167	0.000108325	-0.0452664
ENSG00000090889	0.000117328	-0.0917555
ENSG00000166165	0.000118095	0.191848
ENSG00000170037	0.000154362	-0.0458281
ENSG00000087152	0.000173787	-0.0149485
ENSG00000183527	0.000173787	-0.0434254
ENSG00000134057	0.000173945	-0.0814917
ENSG00000111907	0.000184475	0.118414
ENSG00000175054	0.000184475	-0.0437248
ENSG00000162063	0.000186034	-0.0813849
ENSG00000117650	0.000192638	-0.0843234
ENSG00000100526	0.000194854	-0.0812152
ENSG00000132356	0.000218507	-0.0200311
ENSG00000132153	0.000254851	-0.0442531
ENSG00000094804	0.000258905	-0.112509
ENSG00000187391	0.00028529	0.0681683
ENSG00000156471	0.000340237	-0.0326475
ENSG00000175137	0.000362392	-0.0339971
ENSG00000113161	0.000375682	0.178667
ENSG00000198901	0.000441648	-0.0807778
ENSG00000232656	0.000493817	0.213758
ENSG00000281490	0.000515079	0.0665854
ENSG00000214021	0.000515855	0.108545
ENSG00000119048	0.00054031	0.0228556
ENSG00000160949	0.000548086	-0.0944979
ENSG00000170779	0.000580705	-0.0816771
ENSG00000101773	0.000599924	-0.0487268
ENSG00000175305	0.000632778	-0.130151
ENSG00000052749	0.000732051	-0.0466088
ENSG00000221968	0.000774768	0.0369171
ENSG00000106823	0.000930888	0.142498
ENSG00000241990	0.00113615	-0.0965979
ENSG00000240694	0.0011439	0.121089
ENSG00000256663	0.0011692	-0.110514
ENSG00000120690	0.0011901	0.0705251
ENSG00000113391	0.00121817	0.0383519
ENSG00000010438	0.0012319	-0.0832607
ENSG00000143179	0.001241	-0.0558534
ENSG00000108021	0.00135818	-0.0344157
ENSG00000132688	0.00154892	-0.069608
ENSG00000119326	0.00171016	-0.0316815
ENSG00000212907	0.00172271	0.0811687
ENSG00000184922	0.00197384	0.0620309
ENSG00000138380	0.00211378	0.0609086
ENSG00000150403	0.00213599	0.0132156
ENSG00000136295	0.00229079	-0.023956
ENSG00000198521	0.00235144	-0.0602369
ENSG00000138119	0.0029813	0.0430754
ENSG00000163093	0.00305003	-0.0392309
ENSG00000083857	0.00305222	0.0398757
ENSG00000058056	0.00331812	-0.0365167
ENSG00000169684	0.00336044	-0.104147
ENSG00000092621	0.00345028	0.0610031
ENSG00000168679	0.00345028	0.0980108
ENSG00000164251	0.00354417	-0.215705
ENSG00000126653	0.00366367	-0.0204186
ENSG00000137161	0.00394935	0.0197349
ENSG00000138434	0.00399007	-0.0451471
ENSG00000174177	0.00399007	-0.0289637
ENSG00000213967	0.00444148	-0.119135
ENSG00000100416	0.00483165	-0.0385512
ENSG00000134574	0.00486425	-0.0356336
ENSG00000164402	0.00491155	-0.0345243
ENSG00000122566	0.00495241	-0.0529445
ENSG00000170144	0.00508816	-0.0492528
ENSG00000278771	0.00512335	-0.153022
ENSG00000116132	0.00515166	-0.0837294
ENSG00000173482	0.00521359	0.0720826
ENSG00000167323	0.00527465	0.0476529
ENSG00000123384	0.00535661	0.0616758
ENSG00000145390	0.00535661	0.111519
ENSG00000251562	0.00542388	0.104208
ENSG00000130270	0.00565412	0.0623686
ENSG00000035928	0.00566572	-0.0373582
ENSG00000261888	0.00577437	0.199991
ENSG00000084070	0.00578541	-0.0597084
ENSG00000170989	0.00596765	-0.03864
ENSG00000197020	0.00622254	-0.0793616
ENSG00000008710	0.00637389	0.0381554
ENSG00000079246	0.0064514	-0.0387898
ENSG00000159147	0.00653243	-0.0930356
ENSG00000025156	0.00660158	-0.0247863
ENSG00000078142	0.00671851	0.0477208
ENSG00000079156	0.00671851	-0.0823753
ENSG00000106348	0.00671851	-0.0263733
ENSG00000106537	0.00671851	-0.128984
ENSG00000115884	0.00671851	-0.072257
ENSG00000121774	0.00671851	-0.0351927
ENSG00000154734	0.00671851	0.162894
ENSG00000171914	0.00671851	-0.0614205
ENSG00000068878	0.00674821	-0.0446522
ENSG00000117335	0.00696464	0.065217
ENSG00000139644	0.00710724	0.0200798
ENSG00000143799	0.0071074	-0.0477451
ENSG00000158941	0.0071074	-0.0306508
ENSG00000106392	0.00711417	-0.0536261
ENSG00000170214	0.00725885	0.273437
ENSG00000121236	0.00735598	-0.0465106
ENSG00000075391	0.00737026	0.0248428
ENSG00000175970	0.00741602	-0.0300502
ENSG00000168906	0.0074831	-0.0497162
ENSG00000012963	0.0075501	-0.061483
ENSG00000198498	0.0075501	-0.0523187
ENSG00000067167	0.00757353	0.0584995
ENSG00000111669	0.00757353	-0.050802
ENSG00000153044	0.007721	-0.0870445
ENSG00000184162	0.007721	-0.0820364
ENSG00000181026	0.00772251	-0.0706226
ENSG00000196504	0.00775089	-0.0309177
ENSG00000001630	0.00778994	0.16917
ENSG00000054598	0.00778994	0.100019
ENSG00000108561	0.00778994	-0.0648597
ENSG00000130703	0.00778994	0.0562153
ENSG00000135924	0.00778994	0.0239593
ENSG00000137310	0.00778994	-0.123777
ENSG00000145819	0.00778994	0.145335
ENSG00000173848	0.00778994	-0.0531972
ENSG00000198176	0.00778994	-0.0513621
ENSG00000270647	0.00778994	-0.035595
ENSG00000112118	0.00782114	-0.101025
ENSG00000134046	0.00792445	-0.0387645
ENSG00000162062	0.00792445	-0.141087
ENSG00000056050	0.00809908	-0.0501269
ENSG00000004897	0.00813475	-0.0369696
ENSG00000165704	0.00821864	-0.063384
ENSG00000135698	0.00823996	-0.059544
ENSG00000118418	0.00833067	-0.0497299
ENSG00000128951	0.00838703	-0.0564733
ENSG00000235863	0.00838703	0.108228
ENSG00000141401	0.00860205	0.100486
ENSG00000198554	0.00860205	-0.115029
ENSG00000100292	0.00868484	0.078569
ENSG00000097046	0.00873202	-0.098422
ENSG00000112029	0.00873202	-0.0901314
ENSG00000143228	0.00873202	-0.107068
ENSG00000156256	0.00873202	-0.0384704
ENSG00000183137	0.00873202	-0.0574129
ENSG00000131558	0.00876934	0.0352253
ENSG00000130529	0.00879503	0.0462637
ENSG00000138668	0.00879503	-0.05952
ENSG00000143028	0.00879503	0.195008
ENSG00000187801	0.00879503	-0.0518041
ENSG00000174371	0.00890049	-0.115067
ENSG00000038210	0.00893963	-0.0497072
ENSG00000105971	0.00893963	-0.035174
ENSG00000189091	0.00894635	-0.031198
ENSG00000119333	0.00899076	-0.0659523
ENSG00000081181	0.00906413	-0.0899168
ENSG00000096401	0.00906564	-0.0338992
ENSG00000221914	0.00906564	-0.038799
ENSG00000077514	0.00911701	-0.0722198
ENSG00000104738	0.00911701	-0.102929
ENSG00000132646	0.00911701	-0.0886787
ENSG00000152240	0.00911701	-0.0468423
ENSG00000177606	0.00911701	-0.0651582
ENSG00000102471	0.00914437	0.0887201
ENSG00000174013	0.00914876	-0.0696842
ENSG00000108064	0.00916476	-0.0658777
ENSG00000165891	0.00916476	-0.111469
ENSG00000168556	0.00916933	-0.0618445
ENSG00000196642	0.00916933	-0.0379833
ENSG00000123505	0.00917309	-0.0682805
ENSG00000132780	0.00917309	-0.078344
ENSG00000145833	0.00917309	-0.0442533
ENSG00000164649	0.00917309	-0.0731014
ENSG00000033327	0.00923028	0.0609075
ENSG00000074527	0.00939003	0.150591
ENSG00000012048	0.00942291	-0.0987092
ENSG00000135316	0.00943446	-0.0474058
ENSG00000144909	0.00948523	-0.0495423
ENSG00000100749	0.00955719	-0.0843096
ENSG00000267680	0.00955719	0.0459865
ENSG00000143977	0.00960512	-0.0745319
ENSG00000151148	0.00960512	0.0303954
ENSG00000198604	0.00960512	-0.0610147
ENSG00000039123	0.00962557	-0.0438962
ENSG00000189067	0.00972649	0.0656594
ENSG00000122565	0.00975473	-0.0385676
ENSG00000105750	0.0098769	-0.0519182
ENSG00000213445	0.0098769	-0.0523139
ENSG00000123737	0.00991964	-0.0804853
ENSG00000095002	0.00998715	-0.0645874
ENSG00000159593	0.00999901	-0.0425667
ENSG00000125817	0.0100714	-0.0578445
ENSG00000087086	0.0100752	0.0455735
ENSG00000104524	0.0100752	-0.064001
ENSG00000116584	0.0100752	0.0437581
ENSG00000128708	0.0100752	-0.0762432
ENSG00000130508	0.0100752	0.0317407
ENSG00000138778	0.0100752	-0.104605
ENSG00000158417	0.0100752	-0.0331103
ENSG00000163655	0.0100752	-0.0421379
ENSG00000181104	0.0100752	-0.0339564
ENSG00000144354	0.0100878	-0.131494
ENSG00000111845	0.0101016	-0.0679114
ENSG00000164104	0.0101017	-0.0644629
ENSG00000185989	0.0101017	-0.0322511
ENSG00000035862	0.0101143	0.0391747
ENSG00000101639	0.0101143	-0.0445245
ENSG00000101868	0.0101143	-0.0882332
ENSG00000103326	0.0101143	-0.0593948
ENSG00000114686	0.0101143	-0.045108
ENSG00000129103	0.0101143	0.0249896
ENSG00000136811	0.0101143	-0.0377721
ENSG00000139438	0.0101143	-0.0838597
ENSG00000140332	0.0101143	-0.103072
ENSG00000146247	0.0101143	-0.0377119
ENSG00000150630	0.0101143	-0.0606734
ENSG00000163535	0.0101143	-0.103627
ENSG00000167670	0.0101143	-0.125925
ENSG00000196460	0.0101143	-0.0725036
ENSG00000198830	0.0101143	-0.0482606
ENSG00000205339	0.0101456	-0.0371022
ENSG00000127554	0.0103132	-0.0520495
ENSG00000214655	0.0103132	0.0305417
ENSG00000110422	0.0104121	0.0343966
ENSG00000237973	0.0104334	0.0927988
ENSG00000074266	0.0104475	-0.0622126
ENSG00000102241	0.0104475	-0.0397539
ENSG00000179532	0.0104537	0.108874
ENSG00000035141	0.0104854	-0.0455535
ENSG00000187522	0.0104854	-0.0651454
ENSG00000073910	0.0105208	0.138087
ENSG00000127955	0.0105208	0.0532141
ENSG00000181915	0.0105208	-0.0696822
ENSG00000136982	0.0106043	-0.119854
ENSG00000228716	0.0106097	-0.0816849
ENSG00000158402	0.0106203	-0.0983936
ENSG00000181852	0.0106203	0.0570458
ENSG00000197712	0.0106757	0.0415144
ENSG00000101911	0.0107484	-0.0463061
ENSG00000179271	0.0107484	-0.0535168
ENSG00000115053	0.0107552	-0.0506046
ENSG00000100711	0.0107705	0.0351085
ENSG00000117411	0.0107705	-0.024046
ENSG00000137962	0.0107705	-0.0648285
ENSG00000163029	0.0107705	-0.0397845
ENSG00000127481	0.0108387	0.0333409
ENSG00000127423	0.0108471	-0.14976
ENSG00000173674	0.0108471	-0.0617192
ENSG00000132471	0.0108602	0.0731433
ENSG00000091640	0.0109501	0.0338071
ENSG00000136709	0.0109501	-0.0310596
ENSG00000146143	0.0109501	-0.0543691
ENSG00000156136	0.0109501	-0.0852089
ENSG00000011198	0.0109664	-0.0683553
ENSG00000165119	0.0109836	-0.0217986
ENSG00000183431	0.0109836	-0.0310163
ENSG00000101412	0.0110381	-0.132232
ENSG00000136830	0.0110381	-0.0572987
ENSG00000169258	0.0110381	-0.114909
ENSG00000106028	0.011054	-0.0355572
ENSG00000107798	0.0111084	0.0701626
ENSG00000136527	0.0111425	-0.0401092
ENSG00000163083	0.011191	0.142383
ENSG00000107404	0.0111984	-0.0620084
ENSG00000242588	0.0112332	0.0528196
ENSG00000083642	0.0112617	-0.0298755
ENSG00000162607	0.0113509	-0.0782133
ENSG00000175756	0.0113699	-0.0597334
ENSG00000119403	0.0114409	-0.0512269
ENSG00000139921	0.0115027	-0.03503
ENSG00000171320	0.0115027	-0.0973364
ENSG00000204219	0.0115027	0.0551168
ENSG00000181472	0.0115224	-0.0363182
ENSG00000142864	0.0115504	-0.0499026
ENSG00000065427	0.0115983	-0.0357938
ENSG00000080986	0.0115983	-0.0946578
ENSG00000104320	0.0115983	-0.0322893
ENSG00000115816	0.0115983	-0.0574726
ENSG00000149636	0.0115983	-0.103438
ENSG00000175643	0.0115983	-0.098915
ENSG00000176890	0.0115983	-0.0933473
ENSG00000197170	0.0115983	-0.0526556
ENSG00000114346	0.0116164	-0.0799448
ENSG00000138750	0.0116189	-0.0323607
ENSG00000132275	0.0117098	-0.0271496
ENSG00000107331	0.0117523	0.0323521
ENSG00000067248	0.0117818	-0.0333481
ENSG00000100297	0.0117818	-0.112785
ENSG00000111445	0.0117818	-0.095683
ENSG00000146263	0.0117818	-0.105131
ENSG00000163214	0.0117818	-0.0349585
ENSG00000164611	0.0117818	-0.0751415
ENSG00000197299	0.0117818	-0.124333
ENSG00000172890	0.0117892	0.0499995
ENSG00000153187	0.011808	-0.036673
ENSG00000110987	0.0118326	-0.0559073
ENSG00000128694	0.0118358	-0.0686009
ENSG00000138311	0.0118358	-0.0952522
ENSG00000152818	0.0118883	0.0320938
ENSG00000112739	0.0119702	-0.0290896
ENSG00000092470	0.0120067	-0.112785
ENSG00000132819	0.0120067	-0.0638895
ENSG00000143476	0.0120067	-0.130561
ENSG00000224259	0.0120067	0.192118
ENSG00000092445	0.012085	-0.0695394
ENSG00000241749	0.012085	-0.0867166
ENSG00000162073	0.0121057	-0.103906
ENSG00000085999	0.0121089	-0.104558
ENSG00000125450	0.0121089	-0.0643121
ENSG00000141759	0.0121089	-0.0497038
ENSG00000167747	0.0121089	-0.0842088
ENSG00000180914	0.0121089	0.0672652
ENSG00000107957	0.0121207	0.0316368
ENSG00000156802	0.0121501	-0.111335
ENSG00000159131	0.0121501	-0.0397204
ENSG00000174151	0.0121501	0.0648786
ENSG00000197694	0.0121501	0.0330711
ENSG00000213347	0.0121501	-0.0701675
ENSG00000198363	0.0121702	-0.0206383
ENSG00000169679	0.012176	-0.0839015
ENSG00000092853	0.0121808	-0.125327
ENSG00000163781	0.0121808	-0.0699209
ENSG00000176170	0.0121808	-0.136834
ENSG00000131747	0.012202	-0.0765859
ENSG00000112312	0.0122619	-0.103395
ENSG00000133119	0.012274	-0.121113
ENSG00000113356	0.0122757	-0.0887103
ENSG00000048052	0.0123503	0.108972
ENSG00000234545	0.0123503	-0.0456463
ENSG00000111276	0.012397	0.041393
ENSG00000103227	0.0124052	0.0519389
ENSG00000166272	0.0124052	0.0337879
ENSG00000153922	0.0124176	-0.054068
ENSG00000173145	0.0124176	-0.0629424
ENSG00000276043	0.0124176	-0.124077
ENSG00000174903	0.0124372	-0.0221109
ENSG00000126787	0.0124741	-0.0897502
ENSG00000066279	0.0124781	-0.0804626
ENSG00000093009	0.0124781	-0.111215
ENSG00000101346	0.0124781	-0.0266314
ENSG00000110693	0.0124781	0.0633613
ENSG00000115163	0.0124781	-0.0892671
ENSG00000137040	0.0124781	-0.0609826
ENSG00000140264	0.0124781	0.0399114
ENSG00000150760	0.0124781	0.0264157
ENSG00000163918	0.0124781	-0.0942806
ENSG00000178691	0.0124781	-0.0403501
ENSG00000196961	0.0124781	0.0180664
ENSG00000105676	0.0124789	-0.0537683
ENSG00000132170	0.0124789	-0.0507069
ENSG00000132600	0.0125119	-0.0409219
ENSG00000173638	0.0125187	-0.0722225
ENSG00000011304	0.0125302	-0.0438672
ENSG00000063244	0.0125302	-0.0387273
ENSG00000100413	0.0125302	-0.0323946
ENSG00000105443	0.0125302	0.0424838
ENSG00000132313	0.0125302	-0.0449407
ENSG00000159259	0.0125302	-0.108484
ENSG00000164828	0.0125302	0.0280324
ENSG00000165934	0.0125302	-0.0222333
ENSG00000169379	0.0125302	-0.0553137
ENSG00000227057	0.0125302	-0.0267333
ENSG00000275074	0.0125302	0.0724479
ENSG00000189266	0.0125357	-0.0282457
ENSG00000107949	0.0125821	-0.0499946
ENSG00000143106	0.0126189	0.0514758
ENSG00000214717	0.0126206	0.0257411
ENSG00000111142	0.0126727	-0.0264775
ENSG00000135521	0.0126727	-0.055292
ENSG00000134294	0.0126769	0.0446837
ENSG00000177432	0.0126857	-0.057284
ENSG00000165688	0.0126878	-0.0286414
ENSG00000140044	0.0126902	0.0699388
ENSG00000175061	0.0126902	0.0378595
ENSG00000112081	0.012735	-0.0374963
ENSG00000116396	0.012735	-0.0587717
ENSG00000278259	0.012735	-0.0636309
ENSG00000140632	0.0127424	-0.0211665
ENSG00000114491	0.0127526	-0.0667536
ENSG00000119397	0.0127532	-0.0580097
ENSG00000122966	0.0127532	-0.0679578
ENSG00000133302	0.0127532	-0.0879011
ENSG00000154144	0.0127532	0.0336033
ENSG00000165724	0.0127532	-0.0788303
ENSG00000198911	0.0127876	0.178306
ENSG00000132591	0.0128025	-0.0437362
ENSG00000204387	0.0128362	0.0418316
ENSG00000011332	0.0129207	-0.109449
ENSG00000064042	0.0129207	0.0532708
ENSG00000112576	0.0129207	-0.0512911
ENSG00000166508	0.0129207	-0.10105
ENSG00000011021	0.0129381	0.0826762
ENSG00000137809	0.0129546	0.152563
ENSG00000127337	0.0129689	-0.0814829
ENSG00000115295	0.0129825	0.0521767
ENSG00000119335	0.0129825	-0.0313498
ENSG00000164040	0.0129825	0.0277976
ENSG00000179958	0.0129825	-0.0494076
ENSG00000185070	0.0129825	0.0340345
ENSG00000186283	0.0129825	-0.0338601
ENSG00000164754	0.0130064	-0.0399343
ENSG00000183287	0.0130064	-0.0710512
ENSG00000064607	0.0130183	-0.0293801
ENSG00000082438	0.0130183	0.0638581
ENSG00000221852	0.0130183	0.15796
ENSG00000132383	0.0130682	-0.0489726
ENSG00000164362	0.0130682	-0.0686011
ENSG00000170876	0.0130682	0.0220886
ENSG00000124789	0.0130993	-0.0547854
ENSG00000156508	0.0131107	0.0439127
ENSG00000102878	0.0131308	0.0754203
ENSG00000164172	0.0131308	-0.0281945
ENSG00000126261	0.0131493	-0.0448637
ENSG00000135723	0.0131686	-0.0650082
ENSG00000106688	0.0131954	0.0811744
ENSG00000167325	0.0132148	-0.0809025
ENSG00000125520	0.0132229	-0.0323142
ENSG00000134697	0.0132287	-0.0536214
ENSG00000152795	0.0132287	-0.0366717
ENSG00000117143	0.0132359	-0.0698775
ENSG00000158470	0.0132949	-0.0270916
ENSG00000184216	0.0132986	-0.068177
ENSG00000008130	0.0133188	-0.0281659
ENSG00000117724	0.0133188	-0.0781306
ENSG00000197498	0.0133188	-0.0559139
ENSG00000148834	0.0133842	-0.0436991
ENSG00000119185	0.0134853	-0.0308369
ENSG00000116062	0.0134978	-0.0634483
ENSG00000133794	0.0134978	0.0383445
ENSG00000015532	0.0135617	-0.0259661
ENSG00000274523	0.0136049	-0.0254963
ENSG00000112237	0.0136403	-0.0301029
ENSG00000062822	0.0137657	-0.100504
ENSG00000138180	0.0137657	-0.0968217
ENSG00000147162	0.0137657	0.0624137
ENSG00000196550	0.0137676	-0.0984537
ENSG00000163950	0.013788	-0.0683479
ENSG00000067191	0.0138022	0.0738385
ENSG00000128059	0.0138022	-0.0783195
ENSG00000173281	0.0138022	0.0495959
ENSG00000186594	0.0138022	0.0477309
ENSG00000131153	0.0138127	-0.103168
ENSG00000174804	0.0138197	0.099083
ENSG00000111716	0.0138569	-0.0307271
ENSG00000118193	0.0138569	-0.0891326
ENSG00000162636	0.0139211	-0.042172
ENSG00000166073	0.0139211	0.0516425
ENSG00000127540	0.0139658	0.0203023
ENSG00000137845	0.0140359	0.0567247
ENSG00000182481	0.0140359	-0.0762068
ENSG00000164045	0.0140377	-0.128195
ENSG00000157538	0.0141366	0.0334723
ENSG00000176658	0.0141366	0.0591689
ENSG00000147274	0.0141847	-0.036465
ENSG00000277161	0.0141847	-0.067016
ENSG00000120137	0.0141911	0.0351783
ENSG00000179409	0.0142261	-0.0702579
ENSG00000272711	0.0142446	-0.0953335
ENSG00000115875	0.0142475	-0.072499
ENSG00000065183	0.0143146	-0.0460978
ENSG00000076003	0.0143146	-0.0790222
ENSG00000106609	0.0143146	0.023297
ENSG00000108819	0.0143146	-0.0234486
ENSG00000145901	0.0143146	0.034392
ENSG00000080839	0.0143194	-0.102482
ENSG00000100442	0.01435	-0.0343073
ENSG00000110274	0.01435	-0.0338346
ENSG00000139405	0.01435	-0.0361114
ENSG00000171488	0.0143531	-0.0486631
ENSG00000187583	0.0143618	-0.0682535
ENSG00000013573	0.014404	-0.0812643
ENSG00000181072	0.014404	0.228584
ENSG00000096384	0.0144187	-0.04311
ENSG00000118515	0.0144232	0.0508795
ENSG00000138231	0.0144426	-0.0392257
ENSG00000102780	0.0144439	0.0506372
ENSG00000163346	0.014456	0.114861
ENSG00000156970	0.014497	-0.0960465
ENSG00000001167	0.0145074	-0.0386375
ENSG00000124942	0.0145074	0.0411043
ENSG00000155380	0.0145074	-0.0289953
ENSG00000181163	0.0145074	-0.0352162
ENSG00000188312	0.0145074	-0.0784475
ENSG00000232815	0.0145074	0.046334
ENSG00000236824	0.0145074	-0.100279
ENSG00000061273	0.0145276	0.0271196
ENSG00000123545	0.0145276	-0.0659158
ENSG00000177917	0.0145276	-0.0645663
ENSG00000079459	0.0145474	0.140274
ENSG00000112249	0.0145474	-0.0241567
ENSG00000177374	0.0145516	-0.0663291
ENSG00000057757	0.0145871	-0.0477392
ENSG00000129173	0.0145871	-0.121958
ENSG00000135372	0.0145871	-0.0401928
ENSG00000132549	0.0146003	0.0443569
ENSG00000256229	0.0146276	-0.0492783
ENSG00000206538	0.014654	0.0616135
ENSG00000126216	0.0146838	-0.0468876
ENSG00000003756	0.0147205	0.0274769
ENSG00000164292	0.014779	0.0420711
ENSG00000091986	0.0147805	0.0991709
ENSG00000118246	0.0147805	-0.0393959
ENSG00000140988	0.0147805	-0.0298233
ENSG00000141543	0.0147805	-0.0442951
ENSG00000151690	0.0147805	0.0526198
ENSG00000261236	0.0147805	-0.0939494
ENSG00000161800	0.0148371	-0.0802352
ENSG00000139636	0.0148578	0.070576
ENSG00000131408	0.0148741	0.0260291
ENSG00000058668	0.0149316	0.0454623
ENSG00000187741	0.0149316	-0.095126
ENSG00000069998	0.0149496	-0.0222371
ENSG00000075218	0.0149496	-0.0872812
ENSG00000093217	0.0149496	-0.0494719
ENSG00000155189	0.0149496	-0.0780824
ENSG00000173334	0.0149496	0.0623591
ENSG00000184381	0.0149496	0.119966
ENSG00000213390	0.0149496	-0.0534618
ENSG00000181544	0.0149664	-0.109411
ENSG00000135387	0.0149745	-0.0228222
ENSG00000157456	0.0149745	-0.0704183
ENSG00000224877	0.0149745	-0.107674
ENSG00000116120	0.0149969	-0.0651263
ENSG00000126803	0.0149969	0.06829
ENSG00000135451	0.0149969	-0.0727773
ENSG00000166801	0.0149969	-0.0396507
ENSG00000171848	0.0149969	-0.104403
ENSG00000176208	0.0149969	-0.101391
ENSG00000153246	0.0150969	0.107299
ENSG00000076382	0.0151061	-0.103369
ENSG00000115159	0.0151061	-0.0630396
ENSG00000123064	0.0151061	-0.0390445
ENSG00000135486	0.0151061	-0.0288403
ENSG00000139354	0.0151061	-0.0580975
ENSG00000141503	0.0151061	0.0239046
ENSG00000182326	0.0151061	0.100285
ENSG00000100726	0.0151867	-0.0799011
ENSG00000107815	0.0151867	-0.0552739
ENSG00000112877	0.0151867	-0.0982025
ENSG00000118412	0.0151867	-0.052899
ENSG00000121898	0.0151867	-0.156261
ENSG00000127329	0.0151867	0.088563
ENSG00000133606	0.0151867	0.0384114
ENSG00000152455	0.0151867	-0.0807397
ENSG00000163811	0.0151867	-0.0508863
ENSG00000185960	0.0151867	0.0584642
ENSG00000173391	0.0152016	0.223386
ENSG00000110107	0.0152469	-0.0295394
ENSG00000081913	0.0152508	-0.0513342
ENSG00000123975	0.0152508	-0.0781885
ENSG00000111912	0.0152809	0.0795626
ENSG00000104946	0.0153455	0.0708354
ENSG00000198824	0.0153455	-0.0332205
ENSG00000049541	0.0153926	-0.0917551
ENSG00000012232	0.0153981	-0.0222066
ENSG00000141076	0.0155129	-0.055582
ENSG00000148297	0.0155195	-0.0433538
ENSG00000037897	0.0155264	-0.043217
ENSG00000110400	0.0155264	-0.0709628
ENSG00000162337	0.0155264	0.030948
ENSG00000172893	0.0155264	0.193053
ENSG00000105376	0.0155742	0.0461534
ENSG00000273117	0.0155742	0.0935348
ENSG00000100379	0.0155797	-0.0475858
ENSG00000102575	0.0156032	0.0440916
ENSG00000137547	0.0156032	-0.0520442
ENSG00000103415	0.0156098	-0.0425437
ENSG00000151287	0.0156098	-0.0931189
ENSG00000260404	0.0156098	0.0453294
ENSG00000047315	0.0156191	-0.019211
ENSG00000105426	0.0156865	0.0399514
ENSG00000161618	0.0156865	-0.0513515
ENSG00000170425	0.0156865	0.0689097
ENSG00000137812	0.0156886	-0.0835896
ENSG00000188342	0.0156886	-0.033678
ENSG00000151304	0.0157203	-0.0725849
ENSG00000139687	0.0157373	-0.0347451
ENSG00000104549	0.0157489	0.166435
ENSG00000198744	0.0159227	0.0529877
ENSG00000143164	0.0159898	0.028638
ENSG00000162302	0.0160417	-0.0540314
ENSG00000080815	0.016058	0.0277079
ENSG00000105447	0.0160788	-0.0655537
ENSG00000173064	0.0161485	0.0282219
ENSG00000164815	0.0161695	-0.053137
ENSG00000091651	0.0162244	-0.0982737
ENSG00000130518	0.0162244	0.201405
ENSG00000205268	0.0162244	-0.0516848
ENSG00000245532	0.0162244	0.0934402
ENSG00000049130	0.0163398	-0.0497797
ENSG00000136492	0.0163398	-0.094729
ENSG00000188529	0.0163854	-0.0286508
ENSG00000179094	0.0163899	0.0783478
ENSG00000048649	0.0164333	0.0226862
ENSG00000115364	0.0164663	-0.0374552
ENSG00000065328	0.0164758	-0.118047
ENSG00000067533	0.0164758	-0.0527973
ENSG00000099624	0.0164758	-0.0387732
ENSG00000101940	0.0164758	0.0377045
ENSG00000105419	0.0164758	0.039612
ENSG00000103507	0.016509	-0.0229315
ENSG00000134758	0.0165234	-0.0537752
ENSG00000244462	0.0165439	-0.0391477
ENSG00000100201	0.0165482	0.0494158
ENSG00000275835	0.016564	-0.0459133
ENSG00000100372	0.0166051	-0.0393178
ENSG00000068489	0.0166511	-0.0777703
ENSG00000085840	0.0166663	-0.127713
ENSG00000183283	0.0166663	0.0250094
ENSG00000132768	0.0167118	-0.0389296
ENSG00000196205	0.0167118	0.0534755
ENSG00000121579	0.0167801	-0.0353647
ENSG00000138376	0.0167821	-0.069684
ENSG00000104936	0.0167842	0.062335
ENSG00000175216	0.0167891	-0.0433067
ENSG00000172638	0.0168679	0.0392841
ENSG00000089006	0.016921	-0.0294269
ENSG00000185697	0.016921	-0.0866063
ENSG00000070785	0.0169304	-0.0362515
ENSG00000113569	0.0169304	-0.0656384
ENSG00000188566	0.0169304	-0.0566122
ENSG00000196296	0.0169304	0.104093
ENSG00000196584	0.0169304	-0.120114
ENSG00000005189	0.0169594	-0.0487572
ENSG00000010292	0.0169594	-0.0429257
ENSG00000005175	0.0169633	-0.0296063
ENSG00000006625	0.0169881	-0.0712643
ENSG00000105355	0.0169882	-0.0219486
ENSG00000155858	0.0169882	-0.0600708
ENSG00000117906	0.0170809	-0.030632
ENSG00000173218	0.0171325	-0.0427436
ENSG00000198000	0.0171325	-0.0304478
ENSG00000112339	0.0171653	-0.0266131
ENSG00000100075	0.0171841	0.0539403
ENSG00000118655	0.0172403	-0.0908592
ENSG00000143314	0.0172403	-0.0479997
ENSG00000140365	0.017299	-0.0314478
ENSG00000164163	0.0174196	-0.0584038
ENSG00000214194	0.0174196	-0.0353696
ENSG00000047644	0.0174265	0.0264944
ENSG00000130520	0.0174275	-0.0399166
ENSG00000145348	0.0174275	0.063247
ENSG00000111110	0.0175124	0.083145
ENSG00000135596	0.0175124	0.0384451
ENSG00000260916	0.0175124	0.0420731
ENSG00000128944	0.0176281	-0.0940587
ENSG00000087586	0.017642	-0.0841397
ENSG00000147202	0.0176948	0.0580377
ENSG00000186001	0.0176948	0.0364008
ENSG00000142945	0.017754	-0.0908149
ENSG00000147140	0.017754	-0.0136775
ENSG00000128534	0.0177662	-0.0303004
ENSG00000134824	0.0177662	0.201503
ENSG00000169813	0.0177662	-0.0309252
ENSG00000089737	0.0178127	-0.0242932
ENSG00000145431	0.0178249	-0.0282859
ENSG00000147383	0.0178408	0.0714503
ENSG00000130429	0.0178759	0.0243199
ENSG00000116688	0.0179036	-0.0279105
ENSG00000071794	0.0179099	-0.034205
ENSG00000135446	0.0179099	-0.0296337
ENSG00000167996	0.0179099	0.0601778
ENSG00000136108	0.0179487	-0.0745976
ENSG00000088325	0.0179507	-0.075566
ENSG00000138107	0.0179858	-0.0180236
ENSG00000163661	0.0180082	0.149869
ENSG00000185920	0.0180203	0.0689685
ENSG00000113593	0.0180972	-0.033084
ENSG00000126218	0.0181486	0.13701
ENSG00000101407	0.0181759	-0.0536669
ENSG00000142102	0.0182465	0.0557747
ENSG00000142409	0.0182465	-0.0545368
ENSG00000129932	0.0183012	-0.070927
ENSG00000149054	0.0183545	-0.0422206
ENSG00000163938	0.018356	-0.0369057
ENSG00000141569	0.0185032	-0.0325493
ENSG00000261040	0.0185369	0.112287
ENSG00000076248	0.0185576	-0.052056
ENSG00000188976	0.0185576	-0.0565284
ENSG00000004660	0.0185727	-0.0284612
ENSG00000058272	0.018609	-0.0229766
ENSG00000107104	0.0186105	0.0558082
ENSG00000122873	0.0186105	-0.0368534
ENSG00000178035	0.0186105	-0.0314404
ENSG00000051180	0.0186278	-0.0867681
ENSG00000072415	0.0187844	-0.034194
ENSG00000100519	0.0188817	-0.0315528
ENSG00000118596	0.0189059	0.0376466
ENSG00000136478	0.0189293	-0.018978
ENSG00000198189	0.0189293	0.0452834
ENSG00000130713	0.0189331	-0.076863
ENSG00000146067	0.0189431	0.0392606
ENSG00000120705	0.0190244	-0.0317238
ENSG00000138071	0.0190539	-0.0210485
ENSG00000145685	0.0191039	-0.0318295
ENSG00000128917	0.0192474	-0.136104
ENSG00000177613	0.0192474	-0.0324672
ENSG00000214548	0.0192474	0.0760627
ENSG00000112972	0.0193274	0.235031
ENSG00000130449	0.0193274	0.047338
ENSG00000146223	0.0193274	-0.0238644
ENSG00000171724	0.0193274	0.0552264
ENSG00000204386	0.0193308	0.030131
ENSG00000065923	0.0193467	-0.0481821
ENSG00000187051	0.0193467	-0.0364302
ENSG00000171421	0.0193818	-0.039544
ENSG00000127824	0.019417	-0.0562054
ENSG00000166333	0.019417	-0.0220228
ENSG00000205765	0.019417	0.0248737
ENSG00000029639	0.0194206	-0.0440068
ENSG00000198924	0.0194206	-0.0594229
ENSG00000149554	0.0194412	-0.052579
ENSG00000163428	0.0194412	-0.0289726
ENSG00000173418	0.0194412	-0.0371659
ENSG00000122034	0.0194657	-0.0331669
ENSG00000129968	0.0194657	-0.0251231
ENSG00000274750	0.0194657	0.0717559
ENSG00000173621	0.0194801	-0.0576154
ENSG00000114439	0.0194848	0.0290227
ENSG00000118762	0.0194882	0.0404126
ENSG00000171298	0.0194988	0.0514003
ENSG00000005007	0.0195047	-0.0340868
ENSG00000249115	0.0195047	-0.0733544
ENSG00000006015	0.0195847	-0.0375469
ENSG00000134001	0.0195847	-0.0475303
ENSG00000165264	0.0196614	-0.0285826
ENSG00000160796	0.0196687	0.0507315
ENSG00000183751	0.0196726	-0.0415411
ENSG00000168827	0.0196971	-0.0336177
ENSG00000167513	0.0197713	-0.116317
ENSG00000117399	0.0197722	-0.0885614
ENSG00000119705	0.0198166	-0.0543237
ENSG00000168264	0.0198309	-0.0372515
ENSG00000183856	0.0198309	-0.0673275
ENSG00000145907	0.0198437	-0.0330545
ENSG00000087087	0.0198481	-0.0420139
ENSG00000143353	0.0198481	0.0332074
ENSG00000161692	0.0199262	-0.0633616
ENSG00000007968	0.0199587	-0.0899604
ENSG00000013288	0.0199832	0.0453178
ENSG00000117984	0.0200037	0.0393834
ENSG00000189223	0.0200037	0.0502659
ENSG00000166181	0.0200068	-0.0202821
ENSG00000065243	0.0200131	-0.019838
ENSG00000157240	0.0201301	-0.033194
ENSG00000117308	0.0201818	-0.0743409
ENSG00000083093	0.020193	-0.041765
ENSG00000178409	0.0202602	-0.060127
ENSG00000088682	0.0202955	-0.0298386
ENSG00000102178	0.0203856	-0.0317887
ENSG00000145293	0.0203856	-0.0452896
ENSG00000160752	0.0203856	0.0622327
ENSG00000167615	0.0203856	0.0549939
ENSG00000186193	0.0203856	-0.0983916
ENSG00000196419	0.0203856	-0.022233
ENSG00000096746	0.020408	-0.0533561
ENSG00000105499	0.020408	0.151565
ENSG00000117748	0.020452	-0.0442692
ENSG00000149308	0.020452	-0.0301159
ENSG00000183722	0.0204548	0.0362307
ENSG00000151233	0.0205116	-0.0374552
ENSG00000125912	0.0205128	-0.0368565
ENSG00000127528	0.0205128	-0.0973689
ENSG00000164338	0.0205128	-0.045769
ENSG00000101003	0.0205168	-0.0923938
ENSG00000125744	0.0205267	0.0384179
ENSG00000115738	0.0205766	0.072792
ENSG00000188549	0.0205766	0.0549362
ENSG00000109458	0.0205952	0.0583509
ENSG00000166851	0.0205952	-0.0860028
ENSG00000135763	0.0206873	-0.0693204
ENSG00000027001	0.0207062	-0.0304276
ENSG00000031698	0.0207229	0.0304633
ENSG00000143294	0.0207229	-0.0198066
ENSG00000079134	0.0207406	-0.0513883
ENSG00000221978	0.0208072	0.0454672
ENSG00000133316	0.0208383	-0.046158
ENSG00000141858	0.020846	-0.0412816
ENSG00000140497	0.0209033	0.0341301
ENSG00000030582	0.0209133	0.0455347
ENSG00000180573	0.0209591	0.053988
ENSG00000143319	0.0209662	-0.0303114
ENSG00000149679	0.0209662	-0.0535371
ENSG00000155438	0.0209691	-0.0446298
ENSG00000166197	0.0210485	-0.0582948
ENSG00000055044	0.021098	-0.0564158
ENSG00000140474	0.0211128	-0.0351849
ENSG00000139182	0.0211287	0.0704919
ENSG00000145687	0.0211287	0.076574
ENSG00000089685	0.0211304	-0.0593285
ENSG00000275700	0.0211326	-0.0374565
ENSG00000119242	0.0211498	0.0323357
ENSG00000150990	0.0211498	-0.0432768
ENSG00000174695	0.0211515	-0.0245128
ENSG00000136861	0.0211554	-0.0484079
ENSG00000089280	0.0211634	-0.0513864
ENSG00000065548	0.0211794	-0.0251929
ENSG00000145244	0.0211794	0.192164
ENSG00000247627	0.021186	0.0715298
ENSG00000075618	0.0212006	-0.0348506
ENSG00000249855	0.0212006	0.0438411
ENSG00000244560	0.0212763	0.10416
ENSG00000163714	0.0212856	-0.0332476
ENSG00000164403	0.021343	-0.0324642
ENSG00000167962	0.021343	-0.0315861
ENSG00000170540	0.0213729	-0.0528517
ENSG00000163798	0.0214052	-0.0270575
ENSG00000168872	0.0214833	-0.0188761
ENSG00000103111	0.0216194	0.0257537
ENSG00000140829	0.021714	-0.022843
ENSG00000137804	0.0217253	-0.0691845
ENSG00000057019	0.0217502	-0.0494856
ENSG00000137054	0.0217502	-0.0604372
ENSG00000168404	0.0217922	-0.0464435
ENSG00000247626	0.0217922	-0.0785893
ENSG00000138095	0.0218468	-0.0169764
ENSG00000080608	0.0218597	-0.0483549
ENSG00000171940	0.0218597	0.0215215
ENSG00000101290	0.0219343	0.0297034
ENSG00000109762	0.0220664	-0.0242687
ENSG00000167508	0.0220935	0.136099
ENSG00000160208	0.0221805	-0.0419264
ENSG00000139329	0.0222004	0.0932174
ENSG00000070950	0.0222234	-0.0621659
ENSG00000130164	0.0222234	0.212369
ENSG00000144218	0.0222349	0.102443
ENSG00000014138	0.0222534	-0.0884563
ENSG00000197142	0.0223038	0.123258
ENSG00000249264	0.0223204	0.0617047
ENSG00000166436	0.0223706	0.0617541
ENSG00000162961	0.0224308	-0.0245786
ENSG00000135048	0.0224492	-0.0416237
ENSG00000135968	0.0224492	0.0388952
ENSG00000197070	0.0224682	0.0391041
ENSG00000142544	0.0224934	-0.0649955
ENSG00000101447	0.0225312	-0.0692686
ENSG00000143196	0.0225396	0.0671017
ENSG00000184992	0.0225396	-0.0607145
ENSG00000050438	0.0225531	-0.0336728
ENSG00000168395	0.0225635	-0.0167209
ENSG00000103423	0.0225714	-0.0316377
ENSG00000197442	0.0225714	-0.0438016
ENSG00000181722	0.0225882	0.039915
ENSG00000117697	0.022593	-0.0282899
ENSG00000107263	0.0225983	0.0279765
ENSG00000184787	0.0226589	-0.0348844
ENSG00000105223	0.0227082	0.0418105
ENSG00000257267	0.0227082	-0.0355969
ENSG00000101856	0.0227095	0.0161253
ENSG00000166166	0.0227095	-0.0520704
ENSG00000197746	0.0228109	0.0419416
ENSG00000146872	0.0228288	-0.0208454
ENSG00000124383	0.022832	-0.0265042
ENSG00000068438	0.0228393	-0.0261877
ENSG00000080709	0.0228733	-0.0632824
ENSG00000079277	0.0228762	0.0392185
ENSG00000111665	0.02288	-0.0783332
ENSG00000162604	0.0229678	0.0457953
ENSG00000108828	0.0229694	0.0281271
ENSG00000100036	0.0230044	-0.0502755
ENSG00000147251	0.0231062	0.0567666
ENSG00000141429	0.0232151	-0.0207546
ENSG00000213585	0.0232151	-0.0295878
ENSG00000242147	0.023229	-0.0837621
ENSG00000100028	0.023269	-0.0287053
ENSG00000104979	0.0233364	-0.0236744
ENSG00000184178	0.023358	-0.0293454
ENSG00000146281	0.0233658	-0.0549605
ENSG00000119004	0.0234086	0.0333892
ENSG00000169188	0.0234161	-0.0474509
ENSG00000134222	0.0234691	-0.0582229
ENSG00000148334	0.0234691	-0.0385562
ENSG00000109536	0.0234732	-0.026267
ENSG00000180611	0.0234732	-0.0417293
ENSG00000144063	0.0235158	0.0774817
ENSG00000168116	0.023525	-0.0333789
ENSG00000185361	0.023525	-0.0467942
ENSG00000114573	0.0236724	0.025132
ENSG00000130313	0.0237083	0.0266543
ENSG00000214357	0.0237295	-0.0535484
ENSG00000140285	0.0237338	0.067251
ENSG00000156671	0.0237338	0.0223788
ENSG00000184635	0.023809	-0.0889849
ENSG00000017797	0.0238766	-0.0124763
ENSG00000137834	0.0238771	0.120455
ENSG00000141198	0.0238771	0.0369031
ENSG00000164934	0.0239336	-0.0321068
ENSG00000165244	0.0239427	-0.108915
ENSG00000151694	0.0240188	0.0276514
ENSG00000116106	0.0240398	0.148179
ENSG00000165271	0.0240398	-0.0297065
ENSG00000163930	0.0240494	-0.0105121
ENSG00000198612	0.0240744	-0.0277375
ENSG00000115687	0.024078	-0.0664696
ENSG00000119986	0.024078	0.0422379
ENSG00000150051	0.0241594	0.0820985
ENSG00000136897	0.0241859	-0.0360857
ENSG00000167258	0.0242162	-0.0267643
ENSG00000114767	0.0243164	-0.0637787
ENSG00000114520	0.0243203	-0.0286269
ENSG00000225697	0.0243209	0.0272888
ENSG00000104852	0.0243658	-0.0266095
ENSG00000072042	0.024415	0.0498891
ENSG00000145414	0.0244184	-0.0446033
ENSG00000120437	0.0244247	0.136821
ENSG00000173209	0.0244247	0.0796401
ENSG00000198168	0.0244247	-0.0698936
ENSG00000164466	0.0244294	-0.0374674
ENSG00000120337	0.0244921	0.202161
ENSG00000183828	0.0245462	0.0694787
ENSG00000007080	0.0246061	-0.0251433
ENSG00000106367	0.0246087	-0.0216009
ENSG00000171475	0.0246448	0.0187138
ENSG00000289295	0.0246506	0.0935443
ENSG00000220785	0.0246686	0.0784855
ENSG00000141837	0.0246691	0.0375339
ENSG00000125630	0.0247052	-0.0401137
ENSG00000185104	0.0247906	-0.0233691
ENSG00000187514	0.0251828	-0.0420968
ENSG00000187243	0.0251879	0.0806793
ENSG00000196083	0.0252276	-0.0330379
ENSG00000131828	0.0252283	-0.0228886
ENSG00000004864	0.0252455	-0.0842955
ENSG00000160633	0.0252455	-0.0252736
ENSG00000204186	0.0252455	0.0348404
ENSG00000173456	0.0252502	-0.0298322
ENSG00000144736	0.0252923	-0.0374246
ENSG00000116133	0.0253226	0.162802
ENSG00000103502	0.0253393	0.0267702
ENSG00000086189	0.0253868	-0.0357621
ENSG00000179454	0.0254278	0.0374386
ENSG00000137574	0.0254676	-0.0250321
ENSG00000152683	0.0254676	-0.0225879
ENSG00000236017	0.0254918	0.0879092
ENSG00000139726	0.0255452	-0.0191378
ENSG00000231925	0.0255703	0.0386777
ENSG00000110315	0.0256656	0.0241521
ENSG00000196455	0.0256656	-0.0207887
ENSG00000196876	0.0256698	0.0346906
ENSG00000123213	0.0256822	-0.0376358
ENSG00000182378	0.0258233	-0.0613575
ENSG00000198887	0.025835	-0.0242478
ENSG00000104365	0.0258859	0.0246828
ENSG00000008853	0.0258909	-0.0268265
ENSG00000250182	0.0258909	0.0607554
ENSG00000090060	0.025926	-0.0219365
ENSG00000104969	0.025926	-0.0310617
ENSG00000134318	0.0259565	0.0212346
ENSG00000088205	0.0259818	-0.0320769
ENSG00000145040	0.0259818	-0.069684
ENSG00000173889	0.0259818	0.0224193
ENSG00000112079	0.0260015	0.0292541
ENSG00000120253	0.0260015	-0.0403186
ENSG00000115756	0.0260334	-0.0437063
ENSG00000225855	0.0260334	0.107194
ENSG00000132846	0.0260681	0.0579365
ENSG00000107186	0.026076	0.0329439
ENSG00000184983	0.0261162	-0.0221245
ENSG00000164430	0.026182	-0.0683172
ENSG00000139722	0.0262761	-0.0253446
ENSG00000172716	0.0263533	-0.0321952
ENSG00000197771	0.0264171	-0.0525518
ENSG00000276168	0.0265076	-0.145391
ENSG00000072657	0.0265193	-0.0341233
ENSG00000105877	0.0265193	0.120143
ENSG00000049860	0.0265219	0.0128116
ENSG00000161036	0.0265219	-0.0624614
ENSG00000105401	0.0265767	-0.020196
ENSG00000124155	0.0265918	0.027159
ENSG00000075826	0.0265965	0.0990587
ENSG00000100109	0.0266015	-0.0192917
ENSG00000174780	0.0266346	-0.0211131
ENSG00000171425	0.0266693	0.0612217
ENSG00000153395	0.0267121	-0.0399206
ENSG00000140105	0.0267556	0.0622567
ENSG00000164086	0.0267556	-0.0376646
ENSG00000185658	0.026825	0.0320106
ENSG00000109436	0.0269277	-0.0229055
ENSG00000215252	0.027009	0.0578085
ENSG00000160007	0.0270236	0.0202859
ENSG00000104866	0.0270782	-0.0281661
ENSG00000070047	0.0272104	-0.033561
ENSG00000135241	0.0272104	0.0239733
ENSG00000164105	0.0272104	-0.0524818
ENSG00000285796	0.0272256	0.0792083
ENSG00000102287	0.0272596	0.111165
ENSG00000142794	0.0272651	0.0513319
ENSG00000177508	0.0272651	-0.0441678
ENSG00000077157	0.0273288	0.0643897
ENSG00000140265	0.0273288	0.027969
ENSG00000164323	0.0273288	-0.0227148
ENSG00000112984	0.0273462	-0.056562
ENSG00000121057	0.027397	-0.0272408
ENSG00000176788	0.0275047	-0.0326929
ENSG00000189403	0.0275047	-0.0314945
ENSG00000273151	0.0275047	0.107895
ENSG00000233426	0.02764	0.0454767
ENSG00000100294	0.0277462	-0.0323687
ENSG00000122691	0.0277495	-0.0369508
ENSG00000184227	0.0277495	0.10546
ENSG00000165030	0.0277513	0.11326
ENSG00000099385	0.0277828	-0.0277112
ENSG00000185189	0.0277828	0.0286739
ENSG00000214274	0.0278767	0.0722703
ENSG00000129355	0.0279025	-0.0594554
ENSG00000162630	0.0280121	0.0982435
ENSG00000171451	0.0280121	-0.0635226
ENSG00000162664	0.0281523	-0.0246499
ENSG00000166398	0.0281523	0.0517693
ENSG00000121716	0.0281773	-0.0793455
ENSG00000011638	0.0281823	0.0552982
ENSG00000104870	0.0281853	0.079773
ENSG00000166821	0.0281853	0.0525287
ENSG00000154743	0.0281914	-0.0406026
ENSG00000185532	0.0282124	0.0647408
ENSG00000214753	0.0282225	-0.0175483
ENSG00000113460	0.0282333	-0.0483436
ENSG00000168405	0.0282333	0.0378966
ENSG00000187555	0.0282333	-0.0188265
ENSG00000111605	0.0282367	-0.0222806
ENSG00000135473	0.0282367	0.0482066
ENSG00000023228	0.028256	-0.0159229
ENSG00000171208	0.028256	-0.078785
ENSG00000198690	0.028256	-0.031948
ENSG00000039319	0.0282573	-0.0279785
ENSG00000174165	0.0285486	0.0289619
ENSG00000041353	0.02856	0.114422
ENSG00000115677	0.02856	0.0211675
ENSG00000164916	0.02856	0.0337481
ENSG00000197818	0.02856	0.0244287
ENSG00000121067	0.0285808	0.027009
ENSG00000185504	0.0285968	-0.0259676
ENSG00000101224	0.028687	-0.0354598
ENSG00000136122	0.028687	-0.0622919
ENSG00000003056	0.0288226	-0.0265876
ENSG00000151746	0.0288321	-0.0337231
ENSG00000275131	0.028847	0.079732
ENSG00000168924	0.0289405	-0.0337606
ENSG00000255248	0.0289405	-0.0257081
ENSG00000114405	0.0290396	-0.0385417
ENSG00000160087	0.0291429	-0.028532
ENSG00000178996	0.0292566	0.0377569
ENSG00000198089	0.0292566	-0.0359403
ENSG00000075131	0.0292579	-0.0966459
ENSG00000054611	0.0293047	0.0210992
ENSG00000139613	0.0293564	0.0255541
ENSG00000143641	0.0293736	0.0207243
ENSG00000129245	0.0294234	-0.0369517
ENSG00000103018	0.0294696	-0.0160052
ENSG00000170854	0.0294696	-0.0269351
ENSG00000186480	0.0294696	0.311226
ENSG00000214279	0.0294696	0.0621416
ENSG00000247828	0.0294696	0.0533185
ENSG00000250067	0.0294696	0.0773655
ENSG00000111321	0.0294858	0.0152313
ENSG00000196517	0.0295368	0.0751997
ENSG00000055130	0.0295385	-0.0160338
ENSG00000110921	0.0297114	0.117977
ENSG00000115694	0.0297551	-0.015213
ENSG00000119383	0.0297943	-0.00994888
ENSG00000167191	0.0298024	0.175662
ENSG00000099810	0.0299697	-0.0259321
ENSG00000103043	0.0300042	-0.0257972
ENSG00000117899	0.0300042	-0.0218819
ENSG00000119801	0.0300042	0.0520386
ENSG00000156304	0.0300474	-0.027667
ENSG00000106460	0.0300981	0.0408393
ENSG00000008513	0.0301082	-0.0252215
ENSG00000136010	0.0301379	0.0718523
ENSG00000167767	0.0301379	0.0655062
ENSG00000058729	0.0301497	-0.0226862
ENSG00000162745	0.0301497	-0.063221
ENSG00000165868	0.0301497	-0.036489
ENSG00000160049	0.0301553	-0.0258176
ENSG00000163558	0.0302047	0.0346569
ENSG00000229344	0.0302986	0.0446561
ENSG00000120800	0.0303012	-0.0340579
ENSG00000158122	0.0303012	0.030125
ENSG00000250305	0.0303012	0.0371974
ENSG00000176101	0.0303464	-0.0399231
ENSG00000111252	0.0303762	0.0419983
ENSG00000138834	0.0304015	0.052721
ENSG00000114648	0.0305051	-0.0326164
ENSG00000205560	0.0305051	0.0940728
ENSG00000142207	0.0306111	-0.0308129
ENSG00000029993	0.0306538	-0.0473005
ENSG00000132793	0.0306538	0.0552068
ENSG00000167491	0.0306631	-0.0253932
ENSG00000074696	0.0307547	-0.0128755
ENSG00000150457	0.030762	0.036819
ENSG00000070961	0.0307711	0.0339268
ENSG00000081026	0.0307711	-0.0257136
ENSG00000110756	0.030812	0.0215672
ENSG00000170385	0.030812	0.0250725
ENSG00000104907	0.0308587	-0.0309246
ENSG00000100034	0.0308979	-0.0258106
ENSG00000143493	0.030935	-0.0299526
ENSG00000061676	0.0309403	-0.0171242
ENSG00000156469	0.0310321	-0.0485299
ENSG00000157191	0.0310321	0.0179683
ENSG00000181817	0.0310321	-0.0295861
ENSG00000068912	0.0310997	0.0224422
ENSG00000172270	0.031132	0.0217521
ENSG00000185238	0.0311439	-0.035126
ENSG00000160299	0.0311989	-0.0205269
ENSG00000128272	0.0312132	0.0429662
ENSG00000116127	0.0312368	-0.0306562
ENSG00000180530	0.0313327	-0.0338293
ENSG00000138674	0.0314402	0.0294677
ENSG00000185453	0.0314836	-0.0372602
ENSG00000161904	0.0315555	-0.0218294
ENSG00000116117	0.0316005	0.07291
ENSG00000144711	0.0316778	0.016263
ENSG00000148516	0.0316844	0.030872
ENSG00000143624	0.0318138	0.026589
ENSG00000073536	0.0319478	-0.0253433
ENSG00000161980	0.0320368	-0.0644873
ENSG00000163660	0.0321844	0.0303724
ENSG00000141985	0.0321911	-0.0138978
ENSG00000246705	0.0322197	0.0368866
ENSG00000091140	0.0322442	-0.0179583
ENSG00000115935	0.0322533	0.0229572
ENSG00000139793	0.0323602	0.0352473
ENSG00000177707	0.0323602	-0.0300457
ENSG00000141385	0.0324359	-0.0208228
ENSG00000186866	0.0324868	0.0291901
ENSG00000152558	0.0324922	0.0282934
ENSG00000068650	0.0325254	0.0284574
ENSG00000104356	0.0325918	-0.0602863
ENSG00000114302	0.0326207	-0.0329952
ENSG00000006118	0.0326462	-0.0428962
ENSG00000088930	0.0326505	-0.0108594
ENSG00000089289	0.0326671	0.037989
ENSG00000173473	0.0326671	-0.0236124
ENSG00000077312	0.0327476	-0.0175691
ENSG00000136444	0.0327567	-0.0198355
ENSG00000196611	0.0327996	-0.104171
ENSG00000023318	0.0329034	0.0258543
ENSG00000171793	0.0329164	-0.07215
ENSG00000186834	0.0330441	0.0237061
ENSG00000160113	0.0331216	-0.042438
ENSG00000125730	0.0332146	0.159982
ENSG00000205581	0.0332146	-0.0248706
ENSG00000148175	0.0333205	0.0433445
ENSG00000113580	0.0333215	-0.0204406
ENSG00000177570	0.0333652	0.0712132
ENSG00000162851	0.0333744	-0.0313611
ENSG00000048471	0.0334884	0.0376818
ENSG00000137269	0.0335342	0.0491698
ENSG00000165102	0.0335439	0.0262647
ENSG00000144583	0.0336133	-0.0472633
ENSG00000170145	0.0336912	0.0190933
ENSG00000188807	0.0336912	-0.0564823
ENSG00000152518	0.0337362	-0.0324275
ENSG00000249853	0.0337499	-0.0695043
ENSG00000080573	0.0337544	-0.0886876
ENSG00000133641	0.0338097	-0.0279623
ENSG00000124784	0.0338109	-0.0264008
ENSG00000165802	0.0338603	0.0193748
ENSG00000158717	0.0339325	-0.0296698
ENSG00000111670	0.0339335	0.0282043
ENSG00000166133	0.034014	-0.0319455
ENSG00000115840	0.0341862	-0.0211863
ENSG00000130818	0.0341862	0.0243702
ENSG00000079387	0.0344516	-0.0269264
ENSG00000126953	0.0344748	-0.0596715
ENSG00000164182	0.0346086	-0.0439348
ENSG00000095209	0.0346942	-0.067399
ENSG00000104324	0.0347168	0.0439337
ENSG00000132405	0.0347416	0.0242237
ENSG00000131737	0.0348245	0.175839
ENSG00000153443	0.0349261	0.0203632
ENSG00000066135	0.0350328	0.0327772
ENSG00000184007	0.0350769	-0.0123468
ENSG00000197948	0.0350769	0.0241373
ENSG00000131323	0.0350779	-0.0192966
ENSG00000142892	0.035109	-0.0233767
ENSG00000149091	0.0351925	-0.0274632
ENSG00000255529	0.0351925	0.0280596
ENSG00000059588	0.0352198	-0.037971
ENSG00000159592	0.0352434	0.0161527
ENSG00000234616	0.0352719	-0.0304206
ENSG00000170266	0.0353227	0.0321993
ENSG00000186532	0.0354933	-0.0328144
ENSG00000125734	0.0355689	0.0329177
ENSG00000166250	0.0357804	-0.0191466
ENSG00000181773	0.0358121	-0.077118
ENSG00000131089	0.0360033	0.032168
ENSG00000120688	0.036054	-0.0229721
ENSG00000130956	0.036105	0.0256022
ENSG00000134419	0.036105	-0.0241869
ENSG00000246067	0.036105	-0.0271176
ENSG00000270629	0.0361928	0.0268172
ENSG00000144028	0.0362487	-0.0138654
ENSG00000165097	0.0364033	-0.0220535
ENSG00000099821	0.0364126	-0.0367544
ENSG00000135776	0.036518	-0.043726
ENSG00000223403	0.036616	0.0663881
ENSG00000100580	0.0368241	-0.0358872
ENSG00000130175	0.0368241	0.0142046
ENSG00000196072	0.0368513	-0.021713
ENSG00000065457	0.0368607	-0.0243524
ENSG00000160746	0.0369501	-0.0249249
ENSG00000158864	0.0369931	-0.0157942
ENSG00000174842	0.0369931	-0.0337771
ENSG00000145354	0.0370672	-0.0203929
ENSG00000118894	0.0370789	-0.0437974
ENSG00000182492	0.0374874	0.0243862
ENSG00000187109	0.0374874	-0.0165019
ENSG00000114270	0.0375052	-0.0466205
ENSG00000213047	0.0375052	-0.0317287
ENSG00000157036	0.0376256	-0.0438657
ENSG00000140451	0.0376388	-0.0534931
ENSG00000099995	0.0376771	-0.022584
ENSG00000010256	0.0377032	-0.0122348
ENSG00000272335	0.0377032	0.0646363
ENSG00000133321	0.0377261	0.11599
ENSG00000108953	0.0378818	-0.0120032
ENSG00000133624	0.0379055	0.0422001
ENSG00000037757	0.0379363	-0.0272713
ENSG00000183580	0.0380024	0.037397
ENSG00000214022	0.0380783	-0.0225066
ENSG00000159208	0.0382483	-0.0522034
ENSG00000086475	0.0382895	-0.0380978
ENSG00000273311	0.0382943	-0.0662204
ENSG00000105122	0.0386185	-0.0458027
ENSG00000108528	0.0386628	-0.0303229
ENSG00000174437	0.038689	0.0187147
ENSG00000172061	0.0387299	-0.0981925
ENSG00000249353	0.0387299	-0.0294945
ENSG00000165832	0.0388965	-0.026501
ENSG00000152291	0.0389128	-0.0105097
ENSG00000118689	0.0389772	0.0282552
ENSG00000169045	0.0389834	-0.0281346
ENSG00000106351	0.0390544	-0.0314106
ENSG00000133812	0.0390544	0.0313217
ENSG00000197448	0.0390544	0.0271327
ENSG00000144120	0.0391452	-0.027289
ENSG00000245205	0.0391555	0.0626783
ENSG00000013619	0.0393008	0.0841051
ENSG00000112769	0.0393258	0.0881647
ENSG00000105700	0.0393295	-0.0168543
ENSG00000068366	0.0393381	-0.0328739
ENSG00000101745	0.0395486	0.0203462
ENSG00000205683	0.0395952	-0.0447737
ENSG00000147535	0.0397976	0.023015
ENSG00000134070	0.0398753	-0.0296448
ENSG00000178038	0.0402131	0.0776655
ENSG00000108509	0.0402287	0.0191783
ENSG00000144355	0.0403145	-0.0348942
ENSG00000149547	0.0403655	-0.0179746
ENSG00000119953	0.040643	-0.0176428
ENSG00000161813	0.0406533	-0.022967
ENSG00000100347	0.0406909	-0.0181399
ENSG00000176155	0.0406909	0.0446163
ENSG00000159164	0.0407861	0.0222285
ENSG00000215808	0.040803	0.0500218
ENSG00000111832	0.0409388	-0.0345786
ENSG00000128510	0.0409443	0.142055
ENSG00000155313	0.0410008	0.0219004
ENSG00000163453	0.0410518	0.0361985
ENSG00000172661	0.0411372	0.0194228
ENSG00000001084	0.0411927	0.0350595
ENSG00000147133	0.0412913	0.0165109
ENSG00000173894	0.0412981	-0.059179
ENSG00000140943	0.0413476	0.0229109
ENSG00000213453	0.0415908	0.0760054
ENSG00000107581	0.0415954	-0.014309
ENSG00000189046	0.0416217	-0.0277504
ENSG00000182149	0.0417046	0.0198102
ENSG00000124299	0.0417625	0.0207113
ENSG00000184584	0.0417625	0.0377561
ENSG00000129353	0.0417637	0.0317061
ENSG00000144426	0.0418161	0.0224272
ENSG00000160199	0.0420351	-0.024857
ENSG00000104824	0.0420998	-0.0443345
ENSG00000175193	0.042152	-0.0278644
ENSG00000134245	0.0421709	0.0949374
ENSG00000171827	0.0421709	0.0380592
ENSG00000069869	0.0422153	-0.025246
ENSG00000100842	0.0422247	0.0169481
ENSG00000088833	0.0422353	-0.0251898
ENSG00000161204	0.0424208	-0.0182087
ENSG00000008300	0.0424691	0.050362
ENSG00000157212	0.0426085	-0.0309844
ENSG00000099800	0.0426243	-0.0343386
ENSG00000206052	0.0428101	0.0999756
ENSG00000151914	0.0428758	0.0197871
ENSG00000111358	0.0429234	-0.0171096
ENSG00000163935	0.0429234	-0.0538711
ENSG00000230590	0.0429234	0.0522007
ENSG00000164548	0.0429464	-0.0211024
ENSG00000152926	0.0430652	0.055012
ENSG00000072506	0.0430685	-0.0303445
ENSG00000186767	0.0431166	-0.0370707
ENSG00000136842	0.0431688	0.0824554
ENSG00000147649	0.0431688	-0.0174169
ENSG00000163481	0.0431688	-0.0253129
ENSG00000131238	0.043219	-0.0178143
ENSG00000143889	0.0432727	-0.0169901
ENSG00000116922	0.0434787	-0.0292167
ENSG00000110066	0.0435134	0.0256955
ENSG00000054523	0.0436487	-0.014621
ENSG00000267279	0.0436611	-0.0513442
ENSG00000160285	0.0437218	0.0753714
ENSG00000132967	0.0438045	-0.041367
ENSG00000143153	0.043846	-0.0334671
ENSG00000186951	0.0439573	0.0351888
ENSG00000081791	0.0440891	0.0263037
ENSG00000148296	0.044138	-0.0272853
ENSG00000205181	0.0441595	0.0359599
ENSG00000159423	0.044189	0.0290554
ENSG00000054965	0.0441897	0.019421
ENSG00000196605	0.0442061	0.0686755
ENSG00000139718	0.0442639	0.0245852
ENSG00000158109	0.0442873	0.0185582
ENSG00000090006	0.0442981	0.0649753
ENSG00000157168	0.0442981	-0.0691151
ENSG00000183741	0.0442981	-0.0129745
ENSG00000102743	0.0443021	-0.0540235
ENSG00000183605	0.0443021	-0.0376977
ENSG00000265185	0.0443021	-0.0967887
ENSG00000054118	0.044376	-0.0114541
ENSG00000106459	0.0446169	-0.030977
ENSG00000180011	0.0446169	0.0288993
ENSG00000172432	0.0446311	-0.0195832
ENSG00000147471	0.0446926	0.0176199
ENSG00000137288	0.0447292	-0.0255492
ENSG00000105808	0.0447582	0.0819798
ENSG00000012660	0.0448642	0.0326701
ENSG00000177697	0.0449312	0.0117261
ENSG00000105722	0.0451661	-0.032233
ENSG00000255302	0.045234	-0.0135677
ENSG00000167695	0.0452841	-0.0312
ENSG00000184374	0.0454439	0.0970031
ENSG00000132382	0.0454946	-0.0384291
ENSG00000204842	0.0455335	0.016659
ENSG00000185046	0.0455712	0.081326
ENSG00000146963	0.0456495	-0.0150985
ENSG00000213699	0.0456495	0.0202011
ENSG00000138398	0.0457048	-0.018093
ENSG00000140937	0.0458264	-0.0229142
ENSG00000087088	0.0458334	-0.0189501
ENSG00000135905	0.0458334	-0.0363366
ENSG00000213366	0.0459902	0.0582112
ENSG00000075426	0.046088	0.0305655
ENSG00000162227	0.0461609	-0.0314302
ENSG00000189212	0.0461756	-0.112753
ENSG00000173275	0.0461952	0.0364178
ENSG00000152413	0.0462221	-0.0464501
ENSG00000185115	0.0462221	-0.0236234
ENSG00000142046	0.0462296	0.0768098
ENSG00000035687	0.0463681	-0.0199792
ENSG00000093010	0.0463681	0.0197834
ENSG00000189060	0.0463681	-0.0332798
ENSG00000253304	0.0463936	-0.0252181
ENSG00000125656	0.0464817	-0.0330492
ENSG00000096092	0.0465169	-0.0236659
ENSG00000120833	0.0466206	0.0598855
ENSG00000172869	0.0468152	0.0219116
ENSG00000197324	0.0468496	0.0194482
ENSG00000029363	0.0468789	-0.0249757
ENSG00000189308	0.0468789	-0.0304841
ENSG00000172053	0.0469396	0.026133
ENSG00000276550	0.0469397	0.049615
ENSG00000182180	0.0469595	-0.0152716
ENSG00000269821	0.0469669	0.0537813
ENSG00000163933	0.0470278	-0.0330111
ENSG00000139278	0.0470285	-0.026352
ENSG00000197969	0.0470285	0.019017
ENSG00000196312	0.0473093	0.0324955
ENSG00000090975	0.0474741	0.0460839
ENSG00000111481	0.0475921	0.0158025
ENSG00000067221	0.0476069	-0.0185026
ENSG00000162889	0.0476069	-0.0148376
ENSG00000127837	0.0477123	-0.0203385
ENSG00000205885	0.0477123	0.0624721
ENSG00000286190	0.0478267	0.071325
ENSG00000169760	0.0478782	0.0405214
ENSG00000121039	0.0481077	0.0877964
ENSG00000177628	0.0482994	0.0235698
ENSG00000159111	0.0483838	0.0209535
ENSG00000170584	0.0484422	-0.0227697
ENSG00000068001	0.0484762	-0.0268469
ENSG00000172687	0.0486724	-0.0505166
ENSG00000172785	0.0487487	-0.0255481
ENSG00000171453	0.048886	-0.0295601
ENSG00000102554	0.0490358	0.047867
ENSG00000204681	0.0490574	0.0411025
ENSG00000145365	0.0491091	-0.0376958
ENSG00000163528	0.0491847	-0.040318
ENSG00000135913	0.0491875	-0.041644
ENSG00000119820	0.0492385	0.0164155
ENSG00000112210	0.0495164	0.0209473
ENSG00000117408	0.0495932	-0.0190184
ENSG00000142188	0.0496625	0.0350895
ENSG00000153786	0.0498097	0.0154357
ENSG00000122862	0.0498202	0.0480324
ENSG00000163539	0.0498452	-0.01312
ENSG00000124787	0.0499039	-0.0434842
ENSG00000116191	0.0500564	0.0306616
ENSG00000147408	0.0501228	0.0590322
ENSG00000077348	0.0502481	-0.052203
ENSG00000130052	0.0502945	-0.0284317
ENSG00000182208	0.0503293	0.0222147
ENSG00000130821	0.0503326	0.0280661
ENSG00000188522	0.050359	-0.0349313
ENSG00000139190	0.0505066	0.0564445
ENSG00000111788	0.0505415	-0.0853409
ENSG00000188112	0.0505652	0.0511477
ENSG00000233276	0.0508131	0.0306421
ENSG00000242474	0.0508652	-0.0461005
ENSG00000169715	0.0508727	0.0394861
ENSG00000084073	0.0510599	-0.0193738
ENSG00000088854	0.0510599	0.0160242
ENSG00000108465	0.0510599	0.0450649
ENSG00000121671	0.0510599	0.0229614
ENSG00000129116	0.0510599	0.0276164
ENSG00000163281	0.0510599	-0.0170542
ENSG00000174840	0.0510819	-0.0327409
ENSG00000156384	0.0511522	-0.0438138
ENSG00000233223	0.0511522	0.0409516
ENSG00000180035	0.0512664	-0.043553
ENSG00000106144	0.0512878	-0.0356441
ENSG00000166188	0.0513481	0.0301725
ENSG00000100596	0.0513584	-0.0127135
ENSG00000160200	0.051451	0.0808524
ENSG00000179833	0.0514641	-0.0273242
ENSG00000073605	0.0517632	0.064328
ENSG00000134987	0.0520042	-0.0237864
ENSG00000100938	0.0520824	0.0200295
ENSG00000129195	0.0521572	-0.0616186
ENSG00000169991	0.0522573	-0.0307745
ENSG00000130714	0.052337	0.0288385
ENSG00000173575	0.0523503	0.0326957
ENSG00000091436	0.0524313	-0.0387769
ENSG00000007384	0.0525984	0.0319259
ENSG00000114982	0.0525984	0.0310497
ENSG00000135317	0.0526062	0.0254611
ENSG00000177733	0.0526062	-0.0214841
ENSG00000264247	0.0526062	0.0353029
ENSG00000107651	0.05276	-0.0170744
ENSG00000221983	0.05276	0.0113766
ENSG00000115966	0.0529929	0.0162171
ENSG00000138172	0.0530066	0.0368412
ENSG00000160803	0.0533202	-0.0318869
ENSG00000136840	0.0533303	0.0158768
ENSG00000064547	0.0533999	0.0652441
ENSG00000065833	0.0534108	0.0247875
ENSG00000132535	0.0534873	0.0226691
ENSG00000160294	0.0536672	0.0116397
ENSG00000101974	0.053678	-0.0233788
ENSG00000163322	0.0538029	0.0395691
ENSG00000135686	0.0539166	0.0265539
ENSG00000102349	0.0539253	0.075116
ENSG00000215021	0.0539282	-0.012765
ENSG00000108179	0.0539955	-0.0682697
ENSG00000021355	0.0541397	0.0327343
ENSG00000106266	0.0541594	-0.0202475
ENSG00000152133	0.0542064	-0.0349663
ENSG00000126254	0.0544763	-0.0215665
ENSG00000213337	0.0544935	-0.0478117
ENSG00000100142	0.0545633	-0.0240278
ENSG00000109046	0.054688	0.0332583
ENSG00000140280	0.054688	-0.0458185
ENSG00000155970	0.054811	0.0356937
ENSG00000171160	0.0550022	0.045308
ENSG00000204713	0.0550022	-0.0170334
ENSG00000108588	0.0551301	-0.020156
ENSG00000151806	0.0551727	-0.0244648
ENSG00000136235	0.0552795	0.0531118
ENSG00000116984	0.0554033	-0.0162941
ENSG00000183935	0.0554033	0.0375999
ENSG00000197024	0.0554033	0.020993
ENSG00000137331	0.0554089	-0.0426847
ENSG00000141002	0.0554255	0.0147006
ENSG00000167766	0.0554512	0.0276341
ENSG00000134186	0.0555423	-0.0140726
ENSG00000119396	0.0555697	-0.0110289
ENSG00000122435	0.0556435	-0.0292176
ENSG00000020426	0.0557926	-0.0295465
ENSG00000126456	0.0558739	-0.0134992
ENSG00000144647	0.0560548	-0.0266095
ENSG00000233806	0.0560552	0.131932
ENSG00000198668	0.0560797	-0.0184478
ENSG00000041982	0.0561427	-0.0355221
ENSG00000134698	0.0561427	0.0284359
ENSG00000125505	0.0561992	-0.0147161
ENSG00000112186	0.0564344	0.0263658
ENSG00000113597	0.0565352	-0.0220282
ENSG00000106733	0.0565545	0.0385741
ENSG00000107951	0.0565775	-0.0280292
ENSG00000157954	0.0565836	0.0162499
ENSG00000054654	0.0567511	-0.0314895
ENSG00000171492	0.0567752	0.0352197
ENSG00000137817	0.0568084	0.0285014
ENSG00000131149	0.0568415	0.0215339
ENSG00000240303	0.0568415	0.044185
ENSG00000134287	0.0569085	-0.00742746
ENSG00000118473	0.0569094	0.0515986
ENSG00000123496	0.0569094	-0.143007
ENSG00000145041	0.0569592	-0.0214128
ENSG00000123983	0.0570377	0.0338674
ENSG00000197122	0.0572788	0.0209817
ENSG00000141456	0.0572818	-0.0179664
ENSG00000167657	0.0572818	-0.0221402
ENSG00000120992	0.0574533	-0.0191594
ENSG00000104332	0.0575591	0.0905017
ENSG00000011007	0.0575956	-0.027046
ENSG00000107164	0.0580406	-0.0196334
ENSG00000117318	0.0582489	0.0548378
ENSG00000102024	0.0585822	-0.0248556
ENSG00000198730	0.0587481	-0.0169921
ENSG00000198890	0.0588377	-0.0353122
ENSG00000141552	0.0588534	-0.0151534
ENSG00000149582	0.0589524	0.074137
ENSG00000151693	0.0589952	-0.01699
ENSG00000125484	0.0590427	-0.0142301
ENSG00000139350	0.0590427	-0.0545107
ENSG00000105656	0.059148	0.0181655
ENSG00000128989	0.0594006	-0.0190173
ENSG00000176022	0.059469	-0.0203436
ENSG00000156239	0.0594834	0.0260997
ENSG00000138688	0.0595822	0.0247759
ENSG00000047849	0.0595856	0.0103069
ENSG00000112640	0.059689	-0.0186707
ENSG00000155393	0.059844	-0.0217196
ENSG00000116729	0.0598493	-0.0494668
ENSG00000079482	0.0599691	0.0251309
ENSG00000248527	0.0600122	0.047021
ENSG00000133318	0.0602586	0.0172574
ENSG00000278962	0.0604542	0.0655658
ENSG00000090621	0.0606597	-0.0172691
ENSG00000170581	0.0607338	0.0619327
ENSG00000104522	0.0607341	-0.0244678
ENSG00000130254	0.0607428	-0.0235425
ENSG00000131013	0.0607483	-0.0175855
ENSG00000242125	0.0607483	-0.0424985
ENSG00000159433	0.0607542	0.0303832
ENSG00000137413	0.0608104	0.0305913
ENSG00000185787	0.0608826	0.00815423
ENSG00000186395	0.061141	-0.0329961
ENSG00000110719	0.061278	0.0133079
ENSG00000087076	0.0614501	0.053942
ENSG00000156110	0.0614501	-0.0174657
ENSG00000183337	0.0615054	0.0175242
ENSG00000124224	0.0615424	0.0414263
ENSG00000237870	0.0615874	-0.0953041
ENSG00000138867	0.0616023	0.0130586
ENSG00000136436	0.0617548	0.0176638
ENSG00000122218	0.0617828	0.0211171
ENSG00000049192	0.0617897	-0.0341317
ENSG00000222041	0.061852	-0.0332967
ENSG00000182944	0.0619015	-0.0209266
ENSG00000186812	0.0619015	0.0261307
ENSG00000133110	0.0619482	-0.0674532
ENSG00000131873	0.0619581	-0.0233317
ENSG00000156171	0.0621041	0.033204
ENSG00000175265	0.0623851	0.054762
ENSG00000100304	0.0625309	-0.0511383
ENSG00000263753	0.0627909	0.0226625
ENSG00000181744	0.063193	0.0206598
ENSG00000273033	0.0633218	0.0607635
ENSG00000175768	0.0633851	-0.0347919
ENSG00000182973	0.063464	-0.0201125
ENSG00000141098	0.0634804	-0.0220414
ENSG00000143469	0.0635373	0.0479901
ENSG00000165389	0.0638068	-0.018158
ENSG00000141232	0.0638388	0.031988
ENSG00000136048	0.0640983	0.0698341
ENSG00000159128	0.0642504	-0.0136901
ENSG00000117155	0.0642857	-0.0594826
ENSG00000158483	0.0642859	-0.0281505
ENSG00000140406	0.0643486	-0.0401657
ENSG00000018510	0.0645957	-0.0198285
ENSG00000184436	0.0646297	-0.0217805
ENSG00000181666	0.0648429	0.0199761
ENSG00000075151	0.064889	0.0117977
ENSG00000237440	0.0648955	0.0400053
ENSG00000105325	0.0650102	-0.0201012
ENSG00000180182	0.0653698	-0.0161327
ENSG00000237940	0.0653703	0.118553
ENSG00000119285	0.0654696	-0.0217051
ENSG00000100504	0.0654994	0.0545316
ENSG00000171016	0.0654994	0.0191136
ENSG00000165487	0.0657588	-0.0153034
ENSG00000204590	0.0658693	-0.0127105
ENSG00000173950	0.0659643	-0.0233395
ENSG00000117525	0.0660856	-0.0566663
ENSG00000183955	0.0660856	-0.0129442
ENSG00000184743	0.0664481	0.0128332
ENSG00000149131	0.0665626	0.0827597
ENSG00000135926	0.06668	0.0334468
ENSG00000137492	0.0667688	-0.0170039
ENSG00000181751	0.0669544	-0.0787901
ENSG00000164329	0.0671814	0.0153286
ENSG00000134242	0.0674173	-0.048095
ENSG00000032444	0.0674375	0.0163103
ENSG00000110218	0.0674601	-0.0178919
ENSG00000105221	0.0676542	-0.0146974
ENSG00000182831	0.0676595	-0.0129916
ENSG00000259330	0.0678066	-0.0384477
ENSG00000107290	0.0678262	0.0136844
ENSG00000169710	0.0679412	0.0731447
ENSG00000107130	0.0680583	-0.0199273
ENSG00000143367	0.0680583	0.0394564
ENSG00000088448	0.0680942	0.0388995
ENSG00000160813	0.0685218	-0.0379096
ENSG00000138675	0.0685986	-0.0668974
ENSG00000146676	0.0686327	-0.0171972
ENSG00000112343	0.068729	0.0290783
ENSG00000021776	0.0687386	-0.0103458
ENSG00000049245	0.0688074	-0.00907305
ENSG00000140259	0.0689363	-0.0138149
ENSG00000115526	0.0691553	-0.0222543
ENSG00000135090	0.069504	0.0210693
ENSG00000128602	0.0696392	0.0578144
ENSG00000163520	0.0696413	0.0630099
ENSG00000135362	0.0696449	0.0472609
ENSG00000187713	0.0699097	-0.0214494
ENSG00000166922	0.0703373	0.0878988
ENSG00000084072	0.0705071	-0.0135014
ENSG00000167536	0.0706109	-0.0876234
ENSG00000119042	0.0706213	-0.0179378
ENSG00000224531	0.0706253	-0.0244536
ENSG00000129625	0.0708196	0.0107334
ENSG00000119655	0.0709191	0.0195657
ENSG00000106070	0.0715779	0.0352121
ENSG00000185414	0.0717482	-0.0197414
ENSG00000181418	0.072182	-0.0698987
ENSG00000151276	0.0724702	0.0279709
ENSG00000163347	0.0724843	-0.09033
ENSG00000184182	0.0724843	0.0217293
ENSG00000154134	0.0724947	0.0464164
ENSG00000183808	0.0727571	-0.0222379
ENSG00000125651	0.0730135	-0.00864165
ENSG00000089248	0.073423	0.0221184
ENSG00000076554	0.0734593	-0.0431888
ENSG00000022277	0.0736398	0.0122729
ENSG00000113083	0.0736611	0.0371332
ENSG00000132002	0.0737312	-0.0185314
ENSG00000135269	0.0738796	-0.0299548
ENSG00000245680	0.0738796	0.0341946
ENSG00000136717	0.0738945	0.0273121
ENSG00000223705	0.0741804	0.0344857
ENSG00000100722	0.0743042	-0.0148433
ENSG00000213064	0.074305	-0.0231735
ENSG00000125485	0.0744023	-0.0259468
ENSG00000182154	0.0744023	-0.0264735
ENSG00000174516	0.0744556	0.026636
ENSG00000187867	0.0746335	-0.0685483
ENSG00000137501	0.0748161	0.0512133
ENSG00000135049	0.0750571	-0.0290446
ENSG00000087338	0.0750833	-0.0175534
ENSG00000095321	0.0751213	0.012067
ENSG00000089057	0.0753204	0.0169908
ENSG00000178177	0.0754333	-0.022939
ENSG00000109079	0.0756656	0.0147611
ENSG00000277791	0.0756817	-0.0138055
ENSG00000178033	0.0757095	0.0132194
ENSG00000263740	0.0758636	-0.109079
ENSG00000198860	0.0760727	0.0165544
ENSG00000064692	0.0762219	0.0996007
ENSG00000135655	0.0763132	-0.012405
ENSG00000135074	0.0763163	-0.0656151
ENSG00000091483	0.0764275	-0.0194088
ENSG00000156232	0.0764275	0.019948
ENSG00000066084	0.0764454	-0.0129711
ENSG00000104164	0.0764454	0.0179749
ENSG00000166839	0.0767528	0.0470981
ENSG00000165886	0.0768412	-0.0144109
ENSG00000159140	0.0768638	-0.00696901
ENSG00000173706	0.0768638	0.0252211
ENSG00000147475	0.076925	-0.0111333
ENSG00000182179	0.0769931	0.0617546
ENSG00000070182	0.0770751	-0.0903206
ENSG00000198768	0.0771221	-0.0547022
ENSG00000064651	0.0771232	-0.020038
ENSG00000106415	0.0772695	0.0392132
ENSG00000184465	0.0772946	0.0396208
ENSG00000139880	0.0774014	-0.0237181
ENSG00000198740	0.0781125	0.0208519
ENSG00000233966	0.0781125	-0.0691541
ENSG00000102897	0.0782174	0.0268637
ENSG00000081320	0.078393	-0.0467634
ENSG00000149313	0.0784217	-0.0198617
ENSG00000172965	0.0784226	-0.0196785
ENSG00000154127	0.0784348	-0.0231939
ENSG00000167601	0.0785384	-0.0248644
ENSG00000100911	0.0789709	-0.0313847
ENSG00000066583	0.07932	-0.0186101
ENSG00000105939	0.07957	-0.029681
ENSG00000077254	0.0798068	0.0164549
ENSG00000105974	0.0800854	-0.0231941
ENSG00000213639	0.0800854	0.0217592
ENSG00000223768	0.0801385	0.0228588
ENSG00000186897	0.0802151	-0.0748493
ENSG00000221823	0.0802343	-0.0157855
ENSG00000116350	0.0802552	-0.0121456
ENSG00000166164	0.0803451	-0.0112838
ENSG00000196712	0.0807667	0.015338
ENSG00000162576	0.0809267	0.0183355
ENSG00000185499	0.081023	0.0585211
ENSG00000182173	0.0811394	-0.0410092
ENSG00000196154	0.081356	0.0251626
ENSG00000197622	0.0813585	-0.00993167
ENSG00000172725	0.0814977	0.0205938
ENSG00000166189	0.0816326	-0.0222478
ENSG00000226742	0.0816326	0.0356669
ENSG00000168066	0.0816383	-0.0191512
ENSG00000274602	0.0816383	0.0290113
ENSG00000136770	0.0819871	0.0270318
ENSG00000272325	0.0819912	-0.052654
ENSG00000259479	0.0820867	-0.0668364
ENSG00000100266	0.0823131	-0.0167973
ENSG00000188785	0.0823131	0.0287806
ENSG00000185085	0.0823196	-0.0166705
ENSG00000103356	0.0824693	-0.0152528
ENSG00000163754	0.0827768	0.0128757
ENSG00000170653	0.082871	0.0170553
ENSG00000034693	0.0831285	-0.0246018
ENSG00000144645	0.083149	-0.0210228
ENSG00000198231	0.0834653	-0.00921362
ENSG00000151116	0.083651	-0.0150234
ENSG00000278619	0.0837711	-0.0453595
ENSG00000081692	0.0840678	-0.0235882
ENSG00000187189	0.0841106	0.0151248
ENSG00000160014	0.0844292	-0.014903
ENSG00000107789	0.0847315	-0.0153374
ENSG00000288884	0.0848655	0.0375285
ENSG00000158411	0.0849364	-0.0143578
ENSG00000164983	0.0849772	-0.0177935
ENSG00000063245	0.0851967	-0.0121504
ENSG00000104756	0.0853716	-0.0150879
ENSG00000147403	0.0854382	0.0153822
ENSG00000149292	0.0854632	0.0255857
ENSG00000154945	0.0856049	-0.0121867
ENSG00000178950	0.0856929	-0.0114067
ENSG00000251474	0.0858691	0.0398873
ENSG00000173011	0.0858975	0.0160556
ENSG00000044459	0.0859671	-0.0191368
ENSG00000196338	0.0860241	0.105842
ENSG00000060138	0.08627	-0.015827
ENSG00000127561	0.0863873	0.0782047
ENSG00000112531	0.086465	-0.0102063
ENSG00000100030	0.086582	-0.0104834
ENSG00000048707	0.0866957	0.0130124
ENSG00000169733	0.0867702	0.015773
ENSG00000115524	0.0869746	0.0135419
ENSG00000163820	0.0873914	0.0259825
ENSG00000082641	0.0880062	0.00900056
ENSG00000108094	0.0880062	-0.0141079
ENSG00000128606	0.0880072	0.0745579
ENSG00000163071	0.0880176	0.0670362
ENSG00000109689	0.0882318	-0.0345963
ENSG00000101846	0.0884706	0.025986
ENSG00000183579	0.0886904	-0.0443976
ENSG00000180185	0.0889194	-0.0190569
ENSG00000177954	0.0892035	0.0178659
ENSG00000151553	0.0892111	0.0115998
ENSG00000175606	0.08955	-0.0236332
ENSG00000165494	0.0896484	-0.0156574
ENSG00000164484	0.0900108	-0.0286271
ENSG00000170915	0.0901172	-0.0408086
ENSG00000068323	0.0903038	-0.00944655
ENSG00000141873	0.0904734	-0.0278571
ENSG00000142655	0.0905671	-0.0145906
ENSG00000100350	0.0907131	-0.0268692
ENSG00000143322	0.091307	-0.0305869
ENSG00000119943	0.0913268	0.0611258
ENSG00000159214	0.0920339	0.0401049
ENSG00000187866	0.0920339	0.0159711
ENSG00000138604	0.0921255	-0.0186532
ENSG00000174099	0.0925143	0.0116599
ENSG00000135778	0.0926183	0.025015
ENSG00000120942	0.0930062	-0.0297793
ENSG00000198752	0.0931379	-0.00686865
ENSG00000088986	0.0934887	-0.024885
ENSG00000213694	0.0934895	0.0628673
ENSG00000147883	0.0938251	0.0332235
ENSG00000169504	0.0939466	0.00973037
ENSG00000109680	0.0941523	0.0415318
ENSG00000105053	0.0944687	0.0165137
ENSG00000102053	0.0944808	0.0493907
ENSG00000155111	0.0946533	0.0185525
ENSG00000099899	0.094727	-0.0221677
ENSG00000100196	0.0951392	0.0287762
ENSG00000061794	0.0953126	-0.0193862
ENSG00000073417	0.0953126	-0.0147145
ENSG00000167548	0.0956245	0.0170984
ENSG00000136044	0.0958133	0.0146746
ENSG00000112039	0.0962583	-0.0466587
ENSG00000167658	0.096327	0.0156269
ENSG00000142546	0.0965362	-0.0179608
ENSG00000105048	0.0967591	0.0575571
ENSG00000178878	0.0967787	0.035044
ENSG00000135631	0.0969079	-0.0175517
ENSG00000132522	0.0970442	-0.0451453
ENSG00000157110	0.0971483	0.0303327
ENSG00000152484	0.0975535	-0.0359919
ENSG00000125991	0.0978582	0.0187332
ENSG00000152223	0.0978863	-0.0418828
ENSG00000058600	0.0981802	-0.0191612
ENSG00000119537	0.0981866	0.0189782
ENSG00000087448	0.0984622	-0.0127232
ENSG00000196932	0.0985973	0.083863
ENSG00000116212	0.0990744	-0.0129136
ENSG00000122203	0.0991611	0.0101247
ENSG00000143753	0.0991943	-0.0124529
ENSG00000156374	0.0993869	-0.0231301
ENSG00000242265	0.0995684	-0.0208542
ENSG00000111261	0.100035	0.0467939
ENSG00000166938	0.100045	-0.0218866
ENSG00000162521	0.10021	-0.00835118
ENSG00000258727	0.10036	0.077613
ENSG00000010017	0.100417	-0.015983
ENSG00000088387	0.10048	0.0188131
ENSG00000100823	0.10048	-0.010963
ENSG00000167978	0.100913	0.0156616
ENSG00000083168	0.101169	-0.0112149
ENSG00000161021	0.101169	-0.009892
ENSG00000167595	0.101169	-0.0246799
ENSG00000288838	0.101337	0.0357954
ENSG00000186907	0.101662	0.0465446
ENSG00000198408	0.101697	0.0127696
ENSG00000119900	0.101963	0.0170781
ENSG00000106785	0.102087	-0.0573638
ENSG00000164576	0.102087	0.0251988
ENSG00000013563	0.102173	0.0254467
ENSG00000120053	0.102599	-0.0178912
ENSG00000171791	0.102599	-0.0782967
ENSG00000137824	0.102787	-0.0226896
ENSG00000138381	0.102825	-0.015298
ENSG00000114902	0.103156	-0.00824186
ENSG00000064933	0.103185	-0.020925
ENSG00000074181	0.10329	0.0332295
ENSG00000047188	0.103443	-0.0127301
ENSG00000100422	0.104031	-0.0196389
ENSG00000109944	0.104049	0.0244083
ENSG00000162980	0.104474	-0.014035
ENSG00000099991	0.104489	-0.0120549
ENSG00000164211	0.104837	0.0781727
ENSG00000124596	0.104886	-0.0148244
ENSG00000119401	0.105278	0.011541
ENSG00000169507	0.105553	0.0531082
ENSG00000171872	0.105942	-0.0605853
ENSG00000152784	0.106514	-0.0342783
ENSG00000114125	0.106642	0.0127097
ENSG00000087245	0.106666	0.0199333
ENSG00000134905	0.106666	0.0119871
ENSG00000170633	0.107058	-0.012007
ENSG00000168763	0.107263	0.0207462
ENSG00000163617	0.107327	0.0460143
ENSG00000103769	0.107505	-0.0119357
ENSG00000185813	0.107643	0.0422183
ENSG00000136603	0.107654	0.0230963
ENSG00000172201	0.10817	0.0307306
ENSG00000170919	0.10834	0.0305023
ENSG00000151552	0.108366	-0.0189076
ENSG00000227827	0.108443	0.046464
ENSG00000102119	0.109218	-0.0119145
ENSG00000131781	0.109434	0.0832026
ENSG00000179562	0.109434	0.0124517
ENSG00000181061	0.109452	-0.0173816
ENSG00000198843	0.109497	-0.0166244
ENSG00000152229	0.109585	-0.0236509
ENSG00000145945	0.10983	0.0212918
ENSG00000166532	0.109941	0.0181463
ENSG00000105643	0.110172	0.0251598
ENSG00000175130	0.110653	-0.0365098
ENSG00000179300	0.110674	0.0920658
ENSG00000117594	0.110758	0.0987942
ENSG00000129667	0.110784	-0.020289
ENSG00000157500	0.110784	-0.0147829
ENSG00000138768	0.110857	0.0169898
ENSG00000265808	0.111143	0.016922
ENSG00000197283	0.111803	0.024209
ENSG00000101574	0.111877	-0.0280552
ENSG00000143669	0.11204	0.0276349
ENSG00000133121	0.11219	0.0170974
ENSG00000131773	0.112241	-0.020028
ENSG00000074935	0.112316	0.0224582
ENSG00000003436	0.112346	0.0170235
ENSG00000101680	0.113078	0.0289513
ENSG00000163162	0.113121	-0.0190758
ENSG00000112514	0.113205	0.0116709
ENSG00000250510	0.113217	0.0336072
ENSG00000180370	0.113284	-0.0119942
ENSG00000177788	0.113372	0.0327654
ENSG00000119865	0.114041	-0.0128061
ENSG00000120733	0.114041	0.00945652
ENSG00000122042	0.114041	-0.0114444
ENSG00000137965	0.11408	-0.0932263
ENSG00000163512	0.11408	0.0171988
ENSG00000014914	0.114114	0.0364693
ENSG00000115827	0.114388	0.0157422
ENSG00000118816	0.114388	0.0151094
ENSG00000198780	0.114406	-0.0258172
ENSG00000107897	0.114409	-0.0142287
ENSG00000134686	0.114634	-0.0120138
ENSG00000159348	0.114882	0.0147881
ENSG00000168259	0.11503	-0.0088703
ENSG00000107984	0.115065	0.0351405
ENSG00000204356	0.115329	-0.0128415
ENSG00000157306	0.115419	0.0738721
ENSG00000124222	0.115849	0.0119235
ENSG00000259275	0.115956	0.0921306
ENSG00000157214	0.115978	0.0324132
ENSG00000159399	0.116256	-0.0441043
ENSG00000179899	0.116259	0.04647
ENSG00000136052	0.11626	0.0213937
ENSG00000168016	0.116267	0.0804429
ENSG00000198420	0.116427	0.0119811
ENSG00000111647	0.116886	-0.015041
ENSG00000254837	0.116891	0.0489988
ENSG00000179152	0.116915	0.0199371
ENSG00000118482	0.116948	0.0154023
ENSG00000125675	0.116984	0.0218072
ENSG00000103496	0.117401	-0.0118796
ENSG00000226950	0.117606	-0.0232309
ENSG00000248698	0.117611	0.0544284
ENSG00000182809	0.117971	0.0535349
ENSG00000198517	0.118388	0.0275655
ENSG00000182768	0.118403	-0.0171912
ENSG00000095906	0.118809	-0.0156529
ENSG00000121749	0.119132	0.0122116
ENSG00000123240	0.119291	0.0233949
ENSG00000176946	0.119393	-0.0203989
ENSG00000104331	0.119489	-0.0129962
ENSG00000166925	0.119622	0.0123175
ENSG00000162244	0.119695	0.010269
ENSG00000188130	0.119853	-0.0180339
ENSG00000068400	0.120036	0.0120989
ENSG00000113328	0.120422	0.0369281
ENSG00000124762	0.120543	0.0286468
ENSG00000105928	0.120737	0.0234467
ENSG00000150401	0.121063	0.0207109
ENSG00000043143	0.121653	-0.0145897
ENSG00000107438	0.121834	0.0208236
ENSG00000154917	0.122154	0.0200955
ENSG00000125901	0.122332	-0.0192047
ENSG00000144824	0.12291	-0.0193617
ENSG00000152457	0.123257	-0.0164524
ENSG00000105926	0.123452	-0.0263054
ENSG00000152556	0.123452	-0.0109203
ENSG00000117676	0.123552	-0.0237989
ENSG00000269343	0.124091	-0.030239
ENSG00000134575	0.124269	-0.015758
ENSG00000272734	0.124271	0.0356597
ENSG00000204253	0.124335	-0.0278059
ENSG00000111817	0.124665	-0.0216613
ENSG00000272933	0.124994	-0.0423837
ENSG00000132359	0.125018	-0.025168
ENSG00000166886	0.125119	-0.0142548
[truncated: 1,375 more rows]

## Sheet: Input phase diff among cyclers
Gene pre-filtered for those cycling in both age groups (CircaCompare rhythmic q < 0.05 in old, CircaCompare rhythmic q < 0.05 in young)
Gene	Phase_diff_q_value	Phase_diff (old - young)
ENSG00000092439	1.6563e-09	11.614
ENSG00000176788	1.6563e-09	-8.55071
ENSG00000117118	3.58686e-08	-10.831
ENSG00000141933	3.58686e-08	9.314
ENSG00000143353	3.58686e-08	11.708
ENSG00000205765	3.58686e-08	-11.5211
ENSG00000177888	3.68312e-08	-11.3933
ENSG00000174574	4.32012e-08	-9.7442
ENSG00000263740	1.16153e-07	-10.2688
ENSG00000114125	1.25411e-07	-11.8991
ENSG00000214087	3.17222e-07	11.4783
ENSG00000276168	3.17222e-07	-10.3087
ENSG00000184743	3.36567e-07	-8.37313
ENSG00000172869	3.44646e-07	11.8878
ENSG00000091732	8.00643e-07	10.2959
ENSG00000075624	1.17928e-06	-11.4046
ENSG00000178982	1.17928e-06	-10.7793
ENSG00000165775	1.4872e-06	11.7423
ENSG00000152518	2.52467e-06	-8.57642
ENSG00000063245	2.65697e-06	-11.3677
ENSG00000156467	2.65697e-06	10.1722
ENSG00000115756	2.80218e-06	10.1932
ENSG00000137100	3.38611e-06	-9.94281
ENSG00000171720	3.38611e-06	10.9612
ENSG00000204186	3.43613e-06	-9.49016
ENSG00000089248	3.8235e-06	-10.5121
ENSG00000120063	4.10538e-06	10.7474
ENSG00000168092	4.82422e-06	11.9941
ENSG00000141552	6.00491e-06	9.63194
ENSG00000204262	6.27261e-06	-8.17595
ENSG00000159335	7.35827e-06	-8.81188
ENSG00000120137	7.42244e-06	-9.77061
ENSG00000174231	7.94396e-06	-11.364
ENSG00000278771	9.15142e-06	-10.5207
ENSG00000048649	1.04602e-05	9.44046
ENSG00000258768	1.05552e-05	-9.66756
ENSG00000163788	1.09053e-05	-10.5033
ENSG00000128534	1.27723e-05	-9.35167
ENSG00000204356	1.39048e-05	-9.35934
ENSG00000084623	1.41117e-05	-7.03338
ENSG00000104979	1.54516e-05	-10.5926
ENSG00000185900	1.67623e-05	-5.53175
ENSG00000102978	2.01585e-05	10.2056
ENSG00000154945	2.06398e-05	9.57641
ENSG00000218891	2.06398e-05	11.2575
ENSG00000285793	2.31464e-05	-9.99491
ENSG00000259479	2.40465e-05	11.3114
ENSG00000260916	2.43152e-05	10.5745
ENSG00000164362	2.663e-05	10.1345
ENSG00000143578	2.74949e-05	-10.6619
ENSG00000118482	2.77774e-05	10.1521
ENSG00000205903	2.88078e-05	7.2493
ENSG00000181722	2.96542e-05	-8.46033
ENSG00000171863	3.15057e-05	-10.6515
ENSG00000245680	3.15057e-05	11.2983
ENSG00000143376	4.03983e-05	-6.64136
ENSG00000090971	4.6964e-05	5.78391
ENSG00000161904	4.74583e-05	11.292
ENSG00000188243	5.67448e-05	-9.59658
ENSG00000134419	6.17212e-05	-8.39156
ENSG00000177374	6.61114e-05	-11.7693
ENSG00000168172	6.77114e-05	-8.60432
ENSG00000166479	0.000116672	8.2489
ENSG00000130764	0.00011867	5.58547
ENSG00000272335	0.00011867	-8.8263
ENSG00000272129	0.000126585	-9.42503
ENSG00000169223	0.000136589	-10.3859
ENSG00000099624	0.000173719	6.37094
ENSG00000125656	0.000181166	8.30819
ENSG00000224094	0.000192461	-8.36607
ENSG00000249456	0.000254133	-8.87244
ENSG00000147140	0.000280756	-7.06021
ENSG00000060138	0.000290309	-6.13986
ENSG00000153443	0.000316695	7.42035
ENSG00000167565	0.000316695	-8.94992
ENSG00000103507	0.000316992	9.44264
ENSG00000112200	0.000336515	-8.52446
ENSG00000114737	0.000336515	-10.5984
ENSG00000060237	0.000356469	-8.10666
ENSG00000196419	0.000358412	-6.96545
ENSG00000179454	0.000372558	9.05659
ENSG00000213639	0.000392354	7.29915
ENSG00000103187	0.000404781	-6.65931
ENSG00000179862	0.000444018	-9.16288
ENSG00000277791	0.000497517	-7.59699
ENSG00000100030	0.000516356	-7.2387
ENSG00000188234	0.000561639	8.55661
ENSG00000245910	0.000561639	-6.7717
ENSG00000143761	0.000574565	7.35914
ENSG00000084072	0.000598641	-7.34849
ENSG00000286067	0.000598641	8.23872
ENSG00000106460	0.000648684	9.33738
ENSG00000145919	0.000666256	-7.57416
ENSG00000172531	0.000666256	7.43263
ENSG00000049246	0.00068159	2.51705
ENSG00000122034	0.00068159	-8.96487
ENSG00000213064	0.000732954	-9.48373
ENSG00000213950	0.000732954	-7.7142
ENSG00000264112	0.000776918	5.61718
ENSG00000140406	0.000782762	-8.53398
ENSG00000167074	0.00080348	2.29137
ENSG00000141905	0.00111496	-7.87009
ENSG00000125505	0.00120059	7.43599
ENSG00000160087	0.00120059	7.08882
ENSG00000160813	0.00120059	-4.66601
ENSG00000123179	0.00120549	-7.31479
ENSG00000274523	0.00127488	5.18067
ENSG00000169905	0.00141018	-8.79953
ENSG00000198420	0.00141018	6.3751
ENSG00000273033	0.00154253	-8.18479
ENSG00000100216	0.00159478	-6.22652
ENSG00000184897	0.00163125	-3.41768
ENSG00000116096	0.00168401	6.34249
ENSG00000135968	0.00190384	7.51641
ENSG00000142655	0.00190384	-7.90915
ENSG00000176101	0.00190384	7.29312
ENSG00000181274	0.00190384	-8.49171
ENSG00000240972	0.00193947	8.33644
ENSG00000119004	0.00239112	-7.40365
ENSG00000128989	0.00241077	-6.27749
ENSG00000160113	0.00246332	6.32001
ENSG00000169504	0.00248548	6.20562
ENSG00000138380	0.00276825	-7.32776
ENSG00000147133	0.00281046	-8.10714
ENSG00000239264	0.00301452	-6.70778
ENSG00000265185	0.00319796	-6.55232
ENSG00000104324	0.00322317	-5.72631
ENSG00000173153	0.00329155	5.58279
ENSG00000162636	0.00341542	2.56681
ENSG00000010256	0.00344463	7.46924
ENSG00000103260	0.00344463	5.48499
ENSG00000142546	0.00344463	6.00374
ENSG00000289047	0.00344463	-4.91852
ENSG00000099385	0.00357544	6.05368
ENSG00000126368	0.00373323	2.13278
ENSG00000114978	0.00407786	5.92432
ENSG00000101745	0.00424975	4.51397
ENSG00000166886	0.00428331	7.67983
ENSG00000233223	0.00432313	-6.39248
ENSG00000196338	0.00454265	7.76851
ENSG00000126351	0.00458779	6.51195
ENSG00000115825	0.00463403	-7.6297
ENSG00000156304	0.00474331	-6.56507
ENSG00000177954	0.00474331	-6.28559
ENSG00000174276	0.00479298	5.63191
ENSG00000101972	0.00508773	6.38206
ENSG00000119042	0.00508773	-5.16836
ENSG00000186625	0.00530754	6.24694
ENSG00000247627	0.00530754	6.05688
ENSG00000139329	0.00578276	-7.7142
ENSG00000229344	0.00596153	7.09345
ENSG00000054598	0.00601377	4.73344
ENSG00000157954	0.00601377	-5.69822
ENSG00000162840	0.00601377	-7.93715
ENSG00000169136	0.00601377	6.81807
ENSG00000176022	0.00611586	6.73097
ENSG00000213453	0.00625313	-6.33596
ENSG00000272933	0.00649374	-6.74305
ENSG00000135002	0.00677227	-6.8808
ENSG00000121671	0.00710248	3.08372
ENSG00000162227	0.00728642	6.49649
ENSG00000186395	0.0073899	8.58638
ENSG00000008086	0.00774073	7.26438
ENSG00000082482	0.0077463	3.42606
ENSG00000197982	0.0079018	5.22878
ENSG00000164983	0.00898591	6.33132
ENSG00000102053	0.00927118	6.76719
ENSG00000177370	0.0092998	7.29389
ENSG00000125651	0.00938466	6.52267
ENSG00000136603	0.0095216	-3.75332
ENSG00000176393	0.0095216	-6.09073
ENSG00000243449	0.0095216	-11.058
ENSG00000135241	0.00969074	6.36605
ENSG00000163541	0.00978006	-6.38984
ENSG00000173889	0.00978006	-6.33808
ENSG00000004455	0.0099649	-6.03144
ENSG00000176692	0.00997405	-5.71794
ENSG00000198668	0.0100146	-7.55085
ENSG00000185658	0.0107713	7.34495
ENSG00000060982	0.0110575	4.4065
ENSG00000162396	0.0112048	-5.88614
ENSG00000171552	0.0115273	-5.13583
ENSG00000259956	0.0116359	4.09098
ENSG00000261888	0.0120068	-4.13514
ENSG00000181666	0.0121205	-6.44291
ENSG00000100813	0.0126376	-3.93063
ENSG00000117758	0.0126376	-5.37025
ENSG00000145945	0.0132646	6.04885
ENSG00000029639	0.0133417	-6.94547
ENSG00000270647	0.013611	-4.87344
ENSG00000141985	0.0136362	4.10539
ENSG00000230844	0.0136362	5.90937
ENSG00000099795	0.0137631	4.99891
ENSG00000108819	0.0137631	4.40966
ENSG00000181029	0.0137631	-7.84021
ENSG00000251022	0.0137993	6.3958
ENSG00000163485	0.0141365	6.65445
ENSG00000104219	0.0142266	6.43295
ENSG00000119048	0.0142266	5.10429
ENSG00000133703	0.0142266	6.12138
ENSG00000227671	0.0142266	5.30304
ENSG00000260404	0.0142266	5.655
ENSG00000279170	0.0145506	6.38962
ENSG00000102119	0.0147259	6.57418
ENSG00000119900	0.0150658	6.23841
ENSG00000005189	0.0150799	4.72844
ENSG00000122705	0.0150811	6.51199
ENSG00000013288	0.0169056	-6.63546
ENSG00000115310	0.0169919	-6.08832
ENSG00000177225	0.017148	-3.65317
ENSG00000105376	0.0177514	6.42646
ENSG00000185222	0.0178358	3.63147
ENSG00000185070	0.0183691	4.00264
ENSG00000135486	0.0186214	-4.25926
ENSG00000174738	0.0186214	1.84684
ENSG00000171873	0.0188166	-5.0031
ENSG00000139579	0.0194276	-5.57678
ENSG00000206573	0.0194276	6.56337
ENSG00000255529	0.0194276	5.27436
ENSG00000140988	0.019945	-6.37772
ENSG00000105829	0.0201082	5.74101
ENSG00000204590	0.0203253	-4.67741
ENSG00000177697	0.02088	-4.72856
ENSG00000198740	0.0209581	-6.6297
ENSG00000129968	0.0211518	7.30177
ENSG00000146223	0.0211518	-5.58788
ENSG00000082641	0.0217889	-6.97717
ENSG00000117411	0.0217889	6.24828
ENSG00000135924	0.0217889	-4.97072
ENSG00000154265	0.0217889	4.87907
ENSG00000166833	0.0217889	2.20767
ENSG00000182326	0.0217889	-6.78314
ENSG00000132522	0.0223011	-6.35564
ENSG00000108953	0.0226791	-6.01868
ENSG00000261136	0.0231894	7.15043
ENSG00000289234	0.0237583	4.06912
ENSG00000162576	0.024196	4.56157
ENSG00000270170	0.024196	3.61319
ENSG00000104427	0.0242418	5.60704
ENSG00000197961	0.0242418	-5.1886
ENSG00000167460	0.0242495	-4.41148
ENSG00000148341	0.0245081	-5.09324
ENSG00000129038	0.0253357	-5.01324
ENSG00000150051	0.0256717	5.10062
ENSG00000161203	0.0256717	3.28802
ENSG00000124596	0.0259587	6.4124
ENSG00000198843	0.0260178	-5.46024
ENSG00000128694	0.0271236	-5.39571
ENSG00000125817	0.0279829	5.1668
ENSG00000004534	0.0281071	2.55297
ENSG00000110801	0.0281071	5.20193
ENSG00000142544	0.0281071	6.60048
ENSG00000175455	0.0284324	3.88954
ENSG00000198646	0.0284324	4.33477
ENSG00000106823	0.0286149	-5.93002
ENSG00000142046	0.0286619	6.34022
ENSG00000237440	0.02982	-5.34726
ENSG00000269858	0.02982	5.0109
ENSG00000105137	0.0305352	6.05073
ENSG00000182154	0.0305352	5.50169
ENSG00000101846	0.0308912	-6.44515
ENSG00000108179	0.0317957	-5.15142
ENSG00000048140	0.0334277	4.54704
ENSG00000168066	0.033581	4.08916
ENSG00000235750	0.033581	6.39858
ENSG00000128524	0.034354	5.07415
ENSG00000171681	0.0345891	4.70516
ENSG00000089685	0.0349531	4.51809
ENSG00000136381	0.0349726	-4.67757
ENSG00000122203	0.0352389	5.65567
ENSG00000213799	0.0356148	-5.78286
ENSG00000185127	0.0361532	-6.01435
ENSG00000237232	0.0364335	6.12955
ENSG00000163463	0.0385183	-6.79864
ENSG00000184227	0.0385183	-6.22624
ENSG00000100294	0.0391989	4.93565
ENSG00000109458	0.0392458	5.43565
ENSG00000160199	0.0392458	4.5565
ENSG00000087087	0.040457	4.69112
ENSG00000010292	0.0415937	3.30295
ENSG00000139433	0.042638	-5.73146
ENSG00000123095	0.0436188	2.1228
ENSG00000185813	0.0443529	-3.2208
ENSG00000272325	0.0443529	7.91602
ENSG00000137161	0.0448312	-4.74946
ENSG00000021776	0.0448551	6.28135
ENSG00000151229	0.0451689	5.40174
ENSG00000105329	0.0452296	5.4397
ENSG00000168906	0.0452296	3.78215
ENSG00000187514	0.0452296	-5.4967
ENSG00000189171	0.0452296	-5.04281
ENSG00000205138	0.0465319	3.15401
ENSG00000163346	0.0469659	-5.20029
ENSG00000251143	0.0469659	5.13276
ENSG00000002586	0.0472608	-4.57877
ENSG00000155876	0.0472697	-5.50587
ENSG00000105784	0.0475387	5.90582
ENSG00000125991	0.0478269	-4.91203
ENSG00000102038	0.0479508	-3.29025
ENSG00000123810	0.0482254	5.74743
ENSG00000167491	0.0482254	-5.36427
ENSG00000172059	0.0492442	3.94365
ENSG00000243302	0.0495581	5.59582
ENSG00000160131	0.0499555	-4.85462
ENSG00000157240	0.0500711	2.33199
ENSG00000035862	0.0503023	-4.91962
ENSG00000184182	0.0503023	5.7877
ENSG00000117408	0.0521501	5.88702
ENSG00000186812	0.0521501	-4.4955
ENSG00000075391	0.0528597	2.9106
ENSG00000143774	0.0528597	5.11395
ENSG00000134070	0.0528671	-3.98877
ENSG00000167766	0.0528671	5.53984
ENSG00000122515	0.0530139	4.60703
ENSG00000132967	0.0533897	-3.75515
ENSG00000165997	0.0533897	5.64644
ENSG00000176890	0.0533897	-7.28295
ENSG00000180573	0.0533897	-3.52805
ENSG00000180776	0.0533897	-5.95529
ENSG00000185591	0.0533897	4.85277
ENSG00000251562	0.0533897	3.16593
ENSG00000021826	0.0535039	3.80795
ENSG00000037757	0.0552284	-3.67429
ENSG00000116001	0.0552284	4.57141
ENSG00000128602	0.0553457	4.27924
ENSG00000138468	0.0561607	3.32504
ENSG00000117448	0.0565682	-4.92322
ENSG00000144426	0.0565682	4.74665
ENSG00000153786	0.0565682	-4.06555
ENSG00000273356	0.0565682	5.77423
ENSG00000104093	0.0565786	3.30723
ENSG00000124191	0.0591983	-4.74201
ENSG00000078304	0.0595437	2.40216
ENSG00000152457	0.0595437	4.08322
ENSG00000147274	0.0595929	1.96814
ENSG00000244586	0.0598193	6.42024
ENSG00000182318	0.0607667	6.1347
ENSG00000144451	0.061188	5.17457
ENSG00000168116	0.061188	3.73257
ENSG00000176720	0.061188	4.75344
ENSG00000237973	0.061188	5.45394
ENSG00000261326	0.061188	5.20569
ENSG00000213445	0.062253	3.36394
ENSG00000152926	0.0628561	5.23455
ENSG00000140943	0.0632399	-4.37706
ENSG00000164944	0.0632399	-3.87067
ENSG00000233994	0.0637303	5.77734
ENSG00000127528	0.0637659	-3.78901
ENSG00000048392	0.0645967	5.00533
ENSG00000169020	0.0645967	-5.56671
ENSG00000260261	0.064798	5.62281
ENSG00000112640	0.0653655	2.87878
ENSG00000180035	0.0653655	4.28175
ENSG00000119318	0.0687197	-4.53998
ENSG00000133624	0.0687197	5.36185
ENSG00000073605	0.0697296	2.90558
ENSG00000272994	0.0699847	3.99543
ENSG00000137504	0.0701599	5.87903
ENSG00000128039	0.0709709	-4.96552
ENSG00000129480	0.0709709	-5.83394
ENSG00000197122	0.0709709	3.42101
ENSG00000107957	0.0714302	-3.86848
ENSG00000242086	0.0714682	3.68322
ENSG00000124222	0.0715394	3.3505
ENSG00000170145	0.0715394	-5.00569
ENSG00000101400	0.0719524	4.48248
ENSG00000127483	0.0719524	2.69033
ENSG00000182118	0.0722169	2.73059
ENSG00000248527	0.0722368	6.87322
ENSG00000130818	0.0724207	-3.55306
ENSG00000122966	0.0724613	2.24074
ENSG00000119471	0.0738381	4.54099
ENSG00000168101	0.0740182	3.42332
ENSG00000134318	0.0743701	3.40567
ENSG00000170385	0.0755254	3.87256
ENSG00000227199	0.0756479	4.90005
ENSG00000148334	0.0756552	3.5985
ENSG00000179387	0.0756552	-3.74807
ENSG00000188566	0.0758096	-4.63897
ENSG00000101104	0.0762192	3.80941
ENSG00000135164	0.0762192	4.12967
ENSG00000205730	0.0768836	-4.51366
ENSG00000136052	0.0770401	4.57827
ENSG00000146676	0.0770401	-3.38453
ENSG00000112984	0.0774175	2.72419
ENSG00000115459	0.0778701	4.09609
ENSG00000214022	0.0778701	3.06616
ENSG00000185104	0.0785519	-5.00581
ENSG00000127720	0.0785708	-5.76974
ENSG00000143669	0.0785708	-5.11416
ENSG00000164611	0.0785708	3.57057
ENSG00000171421	0.0785708	4.28303
ENSG00000163520	0.0788294	-4.93823
ENSG00000087152	0.0807162	-2.97391
ENSG00000180370	0.0808868	-4.65627
ENSG00000116473	0.081452	3.94757
ENSG00000213853	0.081452	-4.97188
ENSG00000172795	0.0827403	4.49877
ENSG00000064607	0.0847339	2.56111
ENSG00000160014	0.085386	3.58617
ENSG00000166133	0.085386	4.23655
ENSG00000163798	0.0855762	-4.87246
ENSG00000159164	0.0862107	5.30867
ENSG00000139354	0.0869643	1.94808
ENSG00000144218	0.0871017	4.50653
ENSG00000106144	0.087143	-3.50084
ENSG00000110422	0.087143	-4.32665
ENSG00000132694	0.087143	-2.96287
ENSG00000172638	0.0872151	-4.89353
ENSG00000215252	0.0875282	3.1318
ENSG00000105879	0.087789	3.852
ENSG00000189308	0.0879237	-3.92541
ENSG00000167994	0.0890784	3.20891
ENSG00000223403	0.0916383	2.84193
ENSG00000235954	0.0916383	5.09341
ENSG00000110218	0.0916563	2.59766
ENSG00000267680	0.0916563	4.74916
ENSG00000164916	0.0930831	-4.67776
ENSG00000102125	0.0931237	-3.39811
ENSG00000155850	0.0931237	-3.64562
ENSG00000170584	0.093365	-5.27853
ENSG00000175265	0.0940704	3.75502
ENSG00000142409	0.0945978	4.94846
ENSG00000131381	0.0974889	-4.44682
ENSG00000187713	0.0974889	6.04638
ENSG00000146085	0.0976776	5.03461
ENSG00000125734	0.0984554	-4.06943
ENSG00000141580	0.0984554	4.95583
ENSG00000171174	0.0984554	5.26613
ENSG00000065243	0.0990181	4.32882
ENSG00000122862	0.0990181	-4.47188
ENSG00000130844	0.0990181	5.24199
ENSG00000126216	0.10032	-4.14558
ENSG00000108654	0.10052	3.23277
ENSG00000167508	0.10052	-2.58927
ENSG00000188785	0.10052	-4.72165
ENSG00000165119	0.100949	-2.23799
ENSG00000198690	0.100949	-3.67893
ENSG00000167371	0.100991	2.90171
ENSG00000134900	0.101135	4.66124
ENSG00000136933	0.101295	3.48303
ENSG00000011105	0.101444	-5.13079
ENSG00000081665	0.101444	-4.55413
ENSG00000144028	0.101444	2.91238
ENSG00000151881	0.101444	4.78881
ENSG00000163378	0.101444	-2.95276
ENSG00000177485	0.101444	-4.33761
ENSG00000134851	0.102816	4.30816
ENSG00000198265	0.102816	-3.80832
ENSG00000240053	0.103362	4.71813
ENSG00000163320	0.104251	2.05844
ENSG00000058056	0.104256	3.76691
ENSG00000007080	0.106861	4.70995
ENSG00000172164	0.106878	4.18334
ENSG00000159592	0.106927	3.85329
ENSG00000144583	0.10823	-4.68565
ENSG00000224578	0.108456	-4.61669
ENSG00000158402	0.108956	3.24519
ENSG00000049245	0.109319	-3.86611
ENSG00000162231	0.109319	2.6487
ENSG00000130449	0.109443	5.41955
ENSG00000164117	0.109443	4.14079
ENSG00000112531	0.111049	2.0577
ENSG00000029993	0.112386	3.53947
ENSG00000084090	0.113966	-2.14477
ENSG00000165688	0.113966	3.64853
ENSG00000128791	0.114464	4.68815
ENSG00000118596	0.115243	3.62613
ENSG00000188026	0.115243	4.8714
ENSG00000088833	0.11592	4.30693
ENSG00000167904	0.11592	3.48946
ENSG00000182378	0.11592	-3.53129
ENSG00000276953	0.115949	-3.41382
ENSG00000102780	0.116229	5.16669
ENSG00000166949	0.116477	2.06922
ENSG00000173281	0.116477	-3.32049
ENSG00000197182	0.116477	2.90636
ENSG00000139163	0.117082	4.31326
ENSG00000169684	0.117878	-3.27734
ENSG00000154734	0.118901	5.48412
ENSG00000106028	0.119546	3.49643
ENSG00000251474	0.119975	4.35217
ENSG00000086065	0.121685	-5.22149
ENSG00000103018	0.121685	3.88873
ENSG00000115884	0.121685	-3.1765
ENSG00000178038	0.121685	3.85913
ENSG00000183856	0.121685	2.81152
ENSG00000182934	0.122111	-4.89034
ENSG00000227827	0.122438	4.68433
ENSG00000079805	0.123081	3.68455
ENSG00000121774	0.123081	-2.00903
ENSG00000109046	0.123231	2.01043
ENSG00000125772	0.123369	-3.35202
ENSG00000153246	0.124082	-4.75248
ENSG00000106771	0.124634	-4.64428
ENSG00000167325	0.125309	-4.55551
ENSG00000110697	0.126466	-4.60407
ENSG00000130714	0.126574	3.89095
ENSG00000068489	0.127256	4.39964
ENSG00000232931	0.127605	3.65662
ENSG00000111640	0.12793	-3.18175
ENSG00000110876	0.129066	4.32032
ENSG00000108561	0.129695	-4.75048
ENSG00000165264	0.129695	2.45843
ENSG00000183828	0.129695	4.11163
ENSG00000189403	0.130075	-3.71648
ENSG00000170540	0.130172	2.01786
ENSG00000175221	0.130172	3.91709
ENSG00000008405	0.130356	2.02243
ENSG00000143294	0.130578	4.91469
ENSG00000249855	0.130878	3.36515
ENSG00000006015	0.132647	3.03821
ENSG00000064726	0.132647	4.62122
ENSG00000197111	0.132902	2.81634
ENSG00000241990	0.132902	3.61237
ENSG00000225697	0.134884	3.23955
ENSG00000083812	0.135494	3.63927
ENSG00000179271	0.136659	4.48803
ENSG00000119383	0.138414	3.48304
ENSG00000125967	0.138414	2.87394
ENSG00000124333	0.138505	-4.33196
ENSG00000267279	0.139232	4.46492
ENSG00000186907	0.140152	-4.21844
ENSG00000198356	0.140445	3.57637
ENSG00000100580	0.140846	-3.19282
ENSG00000140280	0.142183	4.1288
ENSG00000149474	0.142183	-2.35631
ENSG00000197121	0.142183	-3.61287
ENSG00000213967	0.142396	-3.02987
ENSG00000141759	0.142595	4.85184
ENSG00000072736	0.142698	3.91535
ENSG00000116667	0.143379	3.53971
ENSG00000087116	0.143685	-4.15151
ENSG00000279821	0.144311	4.29163
ENSG00000170396	0.145899	2.87803
ENSG00000095380	0.146638	-3.90321
ENSG00000126254	0.146638	3.37353
ENSG00000157456	0.146638	2.23546
ENSG00000184363	0.146638	4.33975
ENSG00000134905	0.147298	-4.15295
ENSG00000167595	0.147649	3.81184
ENSG00000103241	0.147677	3.55167
ENSG00000163453	0.148103	2.59064
ENSG00000182809	0.148238	-4.24053
ENSG00000121743	0.148579	2.70008
ENSG00000071894	0.148785	3.02608
ENSG00000130150	0.148785	2.05666
ENSG00000135269	0.148785	-3.95837
ENSG00000167962	0.148785	4.35063
ENSG00000111321	0.149951	3.24788
ENSG00000118816	0.149951	3.07629
ENSG00000288884	0.149951	2.65741
ENSG00000112983	0.152821	1.77311
ENSG00000175606	0.152821	3.08885
ENSG00000212907	0.152821	4.32458
ENSG00000158470	0.153412	-3.75762
ENSG00000115738	0.154382	3.87536
ENSG00000168405	0.155527	1.6535
ENSG00000171161	0.156052	2.38009
ENSG00000232434	0.156052	-4.27504
ENSG00000102189	0.156216	2.63374
ENSG00000143641	0.156422	-4.86543
ENSG00000106367	0.156654	3.90091
ENSG00000149639	0.156654	2.53487
ENSG00000152223	0.156654	-4.44123
ENSG00000170456	0.156654	4.49587
ENSG00000111261	0.159442	4.04943
ENSG00000135862	0.159442	-2.33921
ENSG00000140829	0.159442	4.27331
ENSG00000170144	0.159442	-2.60656
ENSG00000181007	0.159442	-3.77491
ENSG00000198001	0.159442	3.45514
ENSG00000183605	0.159847	-3.52658
ENSG00000213585	0.159847	-4.61349
ENSG00000166813	0.160008	3.75281
ENSG00000145348	0.161748	3.88657
ENSG00000006530	0.162141	-3.48311
ENSG00000120509	0.16261	-3.66279
ENSG00000166436	0.163783	4.08649
ENSG00000111832	0.164167	-4.3798
ENSG00000011451	0.164449	2.70496
ENSG00000242802	0.166703	-3.82176
ENSG00000123384	0.167211	-5.13898
ENSG00000151612	0.167211	-2.84503
ENSG00000171827	0.167211	-4.06698
ENSG00000225855	0.167211	3.34202
ENSG00000233966	0.167211	3.43607
ENSG00000072657	0.170177	3.29373
ENSG00000102349	0.170177	3.81103
ENSG00000110080	0.170376	3.29831
ENSG00000196950	0.170896	3.54333
ENSG00000173334	0.171157	3.33688
ENSG00000100526	0.171617	3.28007
ENSG00000072864	0.172212	1.16799
ENSG00000125912	0.172212	4.34985
ENSG00000162244	0.173591	-4.42666
ENSG00000165868	0.173591	1.44313
ENSG00000171223	0.175106	1.98792
ENSG00000198947	0.175106	4.0623
ENSG00000258727	0.175308	4.07797
ENSG00000110719	0.175989	3.55563
ENSG00000132294	0.175989	4.17321
ENSG00000147475	0.175989	-3.7296
ENSG00000068438	0.175994	-4.60929
ENSG00000134369	0.178203	3.00482
ENSG00000105700	0.18086	4.09371
ENSG00000141569	0.18086	2.69805
ENSG00000152683	0.18086	-3.49415
ENSG00000161692	0.18086	2.43792
ENSG00000170653	0.18086	2.74633
ENSG00000196605	0.181104	3.81407
ENSG00000204681	0.181525	3.08551
ENSG00000065548	0.182101	-4.64995
ENSG00000078043	0.182101	-3.09374
ENSG00000132424	0.1822	2.72091
ENSG00000117650	0.184087	2.28029
ENSG00000137288	0.184087	3.34323
ENSG00000166398	0.184087	3.68482
ENSG00000143771	0.184163	3.21016
ENSG00000163617	0.184182	3.73527
ENSG00000020129	0.184551	3.03902
ENSG00000148154	0.184551	3.0886
ENSG00000205581	0.184551	-2.7458
ENSG00000135720	0.186702	2.72065
ENSG00000137269	0.187353	3.24879
ENSG00000255302	0.187353	3.46924
ENSG00000138443	0.188663	4.417
ENSG00000003436	0.18905	2.04528
ENSG00000050438	0.189323	3.00263
ENSG00000141956	0.189485	2.50998
ENSG00000145390	0.191211	3.66501
ENSG00000155970	0.191211	3.1751
ENSG00000173275	0.191211	3.39718
ENSG00000123870	0.191532	3.60801
ENSG00000265808	0.192243	4.36403
ENSG00000214765	0.192947	2.03199
ENSG00000115827	0.193501	-3.24623
ENSG00000162337	0.193837	3.51339
ENSG00000123064	0.194502	3.18085
ENSG00000122863	0.195285	3.85956
ENSG00000103126	0.196014	3.10982
ENSG00000230590	0.196125	3.54618
ENSG00000198744	0.196935	3.61611
ENSG00000105928	0.197792	3.16817
ENSG00000167186	0.197792	3.24372
ENSG00000179152	0.197792	3.22396
ENSG00000189091	0.197792	-3.44421
ENSG00000175768	0.197857	3.68499
ENSG00000088325	0.198064	3.01562
ENSG00000100036	0.198064	3.35651
ENSG00000092108	0.198819	3.90383
ENSG00000242779	0.201059	3.67039
ENSG00000188636	0.203535	-1.70313
ENSG00000135211	0.203724	3.07869
ENSG00000253304	0.204997	2.22934
ENSG00000125901	0.205134	2.84935
ENSG00000155368	0.205558	-2.74869
ENSG00000105401	0.205826	3.24155
ENSG00000213190	0.205826	-2.67807
ENSG00000136811	0.205892	2.46189
ENSG00000242125	0.205892	3.88021
ENSG00000132768	0.207178	3.20956
ENSG00000081019	0.207181	3.02048
ENSG00000122873	0.207181	3.3431
ENSG00000132031	0.207525	-3.63251
ENSG00000249115	0.209926	-3.39048
ENSG00000133318	0.211769	2.59042
ENSG00000138944	0.211805	-3.57794
ENSG00000137809	0.212269	-3.84833
ENSG00000197969	0.212684	2.30166
ENSG00000254004	0.215059	-2.40502
ENSG00000138668	0.215182	-4.28009
ENSG00000106608	0.215268	2.64644
ENSG00000077454	0.215874	2.14624
ENSG00000173218	0.216744	3.66413
ENSG00000112276	0.219654	3.5545
ENSG00000130396	0.219654	2.98582
ENSG00000164961	0.219654	-3.25554
ENSG00000153187	0.220285	-3.21892
ENSG00000141449	0.220691	2.61016
ENSG00000259330	0.220691	3.02837
ENSG00000082014	0.220836	-3.32446
ENSG00000196083	0.221381	2.94455
ENSG00000115295	0.221767	2.26868
ENSG00000122566	0.221767	-2.96857
ENSG00000130052	0.221767	2.0927
ENSG00000091986	0.222612	-4.97483
ENSG00000155621	0.223123	4.21229
ENSG00000169375	0.224548	1.78444
ENSG00000089057	0.226406	-1.86042
ENSG00000107404	0.226406	3.36592
ENSG00000105750	0.227087	-3.08618
ENSG00000275074	0.227087	-2.80798
ENSG00000096384	0.227327	-3.75025
ENSG00000117385	0.227327	-3.38195
ENSG00000286190	0.227327	-2.97918
ENSG00000143322	0.230384	-3.9089
ENSG00000196550	0.230384	3.44941
ENSG00000105176	0.230874	4.03959
ENSG00000137501	0.230874	3.54173
ENSG00000167536	0.230874	3.41981
ENSG00000176658	0.231647	-3.3621
ENSG00000171298	0.231803	-3.25005
ENSG00000065457	0.23183	-3.36896
ENSG00000107863	0.231951	1.46023
ENSG00000276550	0.23224	2.74626
ENSG00000116260	0.232502	2.91069
ENSG00000163171	0.232502	2.01205
ENSG00000105443	0.233609	1.4617
ENSG00000169679	0.233609	2.24831
ENSG00000166189	0.234228	2.76305
ENSG00000135451	0.234744	2.06868
ENSG00000145687	0.235536	4.0836
ENSG00000164105	0.237469	-3.70923
ENSG00000181072	0.237469	3.55484
ENSG00000183087	0.239632	-2.54414
ENSG00000145431	0.239731	2.31362
ENSG00000113456	0.241924	1.80594
ENSG00000111665	0.242167	2.76719
ENSG00000005007	0.242508	3.95541
ENSG00000164828	0.242508	-2.39806
ENSG00000175573	0.242508	2.66713
ENSG00000196460	0.242508	2.16018
ENSG00000237940	0.242508	2.93874
ENSG00000273888	0.242508	-2.42225
ENSG00000089693	0.242525	2.93734
ENSG00000125730	0.243256	-2.78439
ENSG00000107890	0.243508	3.0775
ENSG00000152804	0.244015	2.77078
ENSG00000089280	0.244142	2.30717
ENSG00000105808	0.244142	3.69794
ENSG00000165671	0.244142	-3.56467
ENSG00000198324	0.244142	3.05627
ENSG00000258056	0.244142	3.68619
ENSG00000079999	0.244509	2.68166
ENSG00000132846	0.244509	3.76582
ENSG00000145740	0.244509	2.08115
ENSG00000152767	0.244509	3.14306
ENSG00000198157	0.244509	-3.27446
ENSG00000114439	0.24583	2.27048
ENSG00000248927	0.245837	3.78706
ENSG00000100842	0.246024	2.88097
ENSG00000151240	0.246024	-2.74287
ENSG00000214135	0.246024	3.29994
ENSG00000148175	0.246481	2.71088
ENSG00000107789	0.248614	-2.93909
ENSG00000171456	0.248823	1.74121
ENSG00000161036	0.249392	3.79047
ENSG00000198825	0.25103	-3.13904
ENSG00000100292	0.252171	-3.74399
ENSG00000101639	0.252662	3.72488
ENSG00000161800	0.252662	3.31625
ENSG00000148672	0.25358	2.81113
ENSG00000131469	0.253941	3.6456
ENSG00000198373	0.253977	3.86202
ENSG00000111358	0.254323	-1.81133
ENSG00000119326	0.254323	-2.88472
ENSG00000133612	0.254323	2.81252
ENSG00000166170	0.254323	-3.91383
ENSG00000170632	0.254323	-3.02316
ENSG00000175048	0.254323	2.84552
ENSG00000172716	0.255977	1.8557
ENSG00000159792	0.256081	-3.20599
ENSG00000213463	0.256081	-3.09941
ENSG00000156471	0.257263	-2.39274
ENSG00000245532	0.257263	2.67447
ENSG00000173950	0.258279	2.2872
ENSG00000153560	0.25861	-2.08388
ENSG00000117724	0.25988	2.06833
ENSG00000119335	0.260618	-3.52033
ENSG00000117143	0.261108	-3.806
ENSG00000189320	0.261607	-3.31163
ENSG00000180008	0.262083	-3.48652
ENSG00000126456	0.263469	-2.85537
ENSG00000152229	0.263469	-2.48444
ENSG00000157214	0.263469	-2.24608
ENSG00000158717	0.263469	3.05501
ENSG00000183955	0.263588	1.73101
ENSG00000197329	0.263588	3.16713
ENSG00000288838	0.263588	-3.29369
ENSG00000103356	0.264561	1.81369
ENSG00000104164	0.264561	-2.49049
ENSG00000119912	0.264561	1.72789
ENSG00000136231	0.264561	2.01128
ENSG00000138336	0.264561	-4.10307
ENSG00000163820	0.264561	-4.05484
ENSG00000242474	0.264561	3.90856
ENSG00000100714	0.265016	-2.99479
ENSG00000101003	0.265789	-1.88857
ENSG00000245205	0.265906	3.29714
ENSG00000172428	0.266246	3.76193
ENSG00000104691	0.266423	-3.24046
ENSG00000117533	0.270163	-2.79904
ENSG00000083093	0.270508	-2.76867
ENSG00000167978	0.270873	2.52311
ENSG00000111412	0.272146	3.96695
ENSG00000196368	0.274521	3.88388
ENSG00000122691	0.274751	-3.76885
ENSG00000103415	0.275043	2.54653
ENSG00000221978	0.27571	2.33661
ENSG00000115306	0.275948	1.14848
ENSG00000124193	0.276096	3.27181
ENSG00000105355	0.278633	2.24408
ENSG00000149091	0.278633	3.33708
ENSG00000160633	0.278633	3.30239
ENSG00000136485	0.27992	2.49639
ENSG00000109320	0.280619	2.70475
ENSG00000124224	0.280619	2.98776
ENSG00000156110	0.280619	-3.20211
ENSG00000166855	0.280619	-3.5641
ENSG00000172081	0.280619	2.23878
ENSG00000078403	0.28144	2.05878
ENSG00000137547	0.28144	2.53761
ENSG00000145996	0.28144	-3.40228
ENSG00000257923	0.283338	-2.1698
ENSG00000047849	0.283998	1.79762
ENSG00000153113	0.284976	2.08609
ENSG00000198464	0.285464	2.46588
ENSG00000131747	0.287334	2.09172
ENSG00000133103	0.287334	3.68151
ENSG00000148516	0.287334	2.60684
ENSG00000158417	0.287334	-1.72053
ENSG00000174165	0.287334	2.79829
ENSG00000204387	0.288055	-3.07045
ENSG00000106443	0.288622	-1.78092
ENSG00000144659	0.288974	2.07792
ENSG00000092199	0.290035	-1.48208
ENSG00000120675	0.290076	4.07914
ENSG00000165359	0.295529	4.08784
ENSG00000075618	0.295626	2.47409
ENSG00000213337	0.295626	3.60638
ENSG00000221983	0.295626	3.21963
ENSG00000111057	0.29574	-2.18359
ENSG00000140265	0.29574	2.74143
ENSG00000120053	0.295781	3.05697
ENSG00000127554	0.295781	2.7787
ENSG00000131153	0.295781	-2.06379
ENSG00000215021	0.295781	3.27033
ENSG00000160049	0.296796	-2.55363
ENSG00000150630	0.296873	-3.39864
ENSG00000154127	0.296873	1.99808
ENSG00000067596	0.296946	2.97317
ENSG00000103365	0.296946	2.39753
ENSG00000136861	0.296946	2.92685
ENSG00000163481	0.296946	3.48196
ENSG00000169738	0.296946	3.08209
ENSG00000273270	0.296946	-1.95525
ENSG00000148400	0.29708	2.24214
ENSG00000180611	0.29708	-2.63248
ENSG00000213699	0.29708	-2.64762
ENSG00000165071	0.297648	3.68314
ENSG00000063244	0.298003	2.46569
ENSG00000136830	0.298003	2.79866
ENSG00000174695	0.298003	3.30877
ENSG00000087338	0.299245	2.32239
ENSG00000078142	0.302487	-3.75646
ENSG00000225733	0.302803	-2.31451
ENSG00000126218	0.303338	-3.34309
ENSG00000132326	0.303338	1.04509
ENSG00000132688	0.303338	2.77896
ENSG00000137824	0.303338	2.16474
ENSG00000139644	0.303338	4.02108
ENSG00000170915	0.303338	3.47085
ENSG00000196296	0.303338	2.55369
ENSG00000237350	0.303608	3.46
ENSG00000075275	0.303841	3.14009
ENSG00000076984	0.303841	-3.82267
ENSG00000081320	0.303841	-2.27579
ENSG00000100413	0.303841	2.21786
ENSG00000119820	0.303841	2.85923
ENSG00000138675	0.303841	-2.88276
ENSG00000152556	0.303841	2.19428
ENSG00000163482	0.303841	3.00331
ENSG00000181817	0.303841	2.54855
ENSG00000266028	0.303841	1.59615
ENSG00000206527	0.303964	-3.20135
ENSG00000139405	0.305024	2.15464
ENSG00000198346	0.305024	3.06461
ENSG00000008517	0.305196	-3.7161
ENSG00000181418	0.306849	2.13066
ENSG00000185453	0.306849	-2.95874
ENSG00000134057	0.307176	1.79676
ENSG00000076356	0.307815	-2.50101
ENSG00000100266	0.307815	2.79009
ENSG00000128928	0.307815	-2.49664
ENSG00000118193	0.307961	2.17755
ENSG00000230409	0.307961	2.67029
ENSG00000121957	0.308196	0.873791
ENSG00000214279	0.308196	2.52704
ENSG00000185189	0.308268	2.45575
ENSG00000172775	0.308721	3.07116
ENSG00000065923	0.309011	-1.91041
ENSG00000117399	0.309262	2.40604
ENSG00000132485	0.309262	2.70433
ENSG00000185619	0.309262	2.43745
ENSG00000111252	0.310773	-2.02018
ENSG00000112837	0.310879	3.08838
ENSG00000131437	0.310879	-2.04762
ENSG00000186001	0.312669	2.44673
ENSG00000082438	0.313276	3.24317
ENSG00000149308	0.313381	2.12492
ENSG00000174780	0.313536	-2.45305
ENSG00000070770	0.31359	2.33661
ENSG00000108439	0.313926	-3.57665
ENSG00000274602	0.313959	2.59958
ENSG00000285868	0.313959	-2.41099
ENSG00000152291	0.314012	2.10123
ENSG00000183137	0.315837	2.69361
ENSG00000116191	0.316316	2.1616
ENSG00000197603	0.316316	-2.51343
ENSG00000116786	0.316336	-2.36571
ENSG00000031691	0.31825	-2.10726
ENSG00000198176	0.318267	-2.41387
ENSG00000005238	0.318545	-3.39866
ENSG00000105122	0.318545	-3.30325
ENSG00000104177	0.318578	1.96148
ENSG00000130382	0.31989	2.32162
ENSG00000164040	0.31989	2.77715
ENSG00000119986	0.32049	2.977
ENSG00000129355	0.320871	-1.89514
ENSG00000100109	0.321057	3.23025
ENSG00000146376	0.321057	-2.25721
ENSG00000182197	0.321057	1.42417
ENSG00000108389	0.321976	3.33207
ENSG00000173209	0.322285	2.22624
ENSG00000170633	0.322532	3.45209
ENSG00000205181	0.322532	1.62967
ENSG00000079246	0.323366	-3.09944
ENSG00000169710	0.323366	-2.18197
ENSG00000137494	0.324693	2.84718
ENSG00000012963	0.325406	-2.73829
ENSG00000111880	0.325406	-4.02941
ENSG00000101546	0.325966	-3.50489
ENSG00000129173	0.325966	-2.29255
ENSG00000152977	0.325966	3.46668
ENSG00000182612	0.325966	1.85967
ENSG00000280206	0.325966	1.40535
ENSG00000066279	0.326237	1.77704
ENSG00000080986	0.326375	2.73848
ENSG00000107164	0.326375	2.71202
ENSG00000127824	0.326375	-2.44655
ENSG00000155380	0.326375	2.00444
ENSG00000178996	0.326375	2.09437
ENSG00000204305	0.326375	3.04169
ENSG00000095906	0.326856	2.61009
ENSG00000111788	0.326856	-3.13131
ENSG00000115526	0.326856	1.31005
ENSG00000183023	0.327452	3.13391
ENSG00000181026	0.32871	-3.28003
ENSG00000138172	0.329924	-2.59218
ENSG00000164754	0.330752	1.86594
ENSG00000162630	0.330791	2.92546
ENSG00000128944	0.331163	2.7549
ENSG00000175216	0.33148	1.83445
ENSG00000289295	0.33148	3.24309
ENSG00000074696	0.332327	-2.42382
ENSG00000120709	0.332327	-2.53161
ENSG00000148484	0.332327	-2.32126
ENSG00000170037	0.332327	1.60015
ENSG00000114374	0.332364	3.48315
ENSG00000166938	0.332364	-1.58291
ENSG00000159433	0.332473	2.63778
ENSG00000100911	0.333306	-2.51429
ENSG00000162980	0.333306	-2.24428
ENSG00000144120	0.33331	2.49459
ENSG00000100379	0.333878	2.26448
ENSG00000130119	0.333878	-2.98051
ENSG00000173456	0.336376	2.05976
ENSG00000138434	0.337179	2.309
ENSG00000164284	0.337179	-3.20316
ENSG00000091592	0.338054	3.10521
ENSG00000129245	0.338054	3.04756
ENSG00000165487	0.338054	2.86169
ENSG00000261609	0.338054	-2.45102
ENSG00000105676	0.339878	2.72491
ENSG00000125450	0.340238	-3.73166
ENSG00000100142	0.340865	2.50536
ENSG00000177303	0.340865	2.31406
ENSG00000166889	0.340983	1.32732
ENSG00000184983	0.341558	3.05368
ENSG00000138834	0.341764	3.0242
ENSG00000079156	0.34182	-2.55054
ENSG00000213390	0.34182	1.68841
ENSG00000030582	0.342213	-2.38294
ENSG00000121749	0.34261	2.53487
ENSG00000119408	0.342747	2.25766
ENSG00000141873	0.342747	2.49253
ENSG00000165271	0.343676	1.63565
ENSG00000107186	0.343998	3.43103
ENSG00000120992	0.343998	-2.14438
ENSG00000111605	0.345673	1.16665
ENSG00000147100	0.345673	-2.14278
ENSG00000160294	0.345673	-2.40137
ENSG00000163249	0.345673	2.49262
ENSG00000170266	0.345673	-3.03846
ENSG00000171848	0.345673	-2.71549
ENSG00000240303	0.345673	3.11386
ENSG00000008130	0.346155	2.96237
ENSG00000126790	0.346155	1.50572
ENSG00000130881	0.346155	1.92712
ENSG00000175756	0.346155	2.81507
ENSG00000228526	0.346155	2.89655
ENSG00000288558	0.346155	3.33804
ENSG00000137513	0.346665	2.81526
ENSG00000113597	0.346989	-3.41685
ENSG00000129625	0.346989	-3.1949
ENSG00000102287	0.347615	2.53626
ENSG00000137331	0.347615	2.33496
ENSG00000149571	0.34957	-1.67177
ENSG00000130021	0.350602	-2.83953
ENSG00000166821	0.350602	-2.64659
ENSG00000178177	0.350602	3.032
ENSG00000114573	0.351002	-2.68596
ENSG00000087088	0.35167	-2.12394
ENSG00000104870	0.352029	-2.97013
ENSG00000197885	0.352299	1.99168
ENSG00000101150	0.352335	-2.74807
ENSG00000124784	0.352335	2.89795
ENSG00000162302	0.352335	2.92175
ENSG00000182481	0.352335	2.18947
ENSG00000228696	0.352335	3.71518
ENSG00000003756	0.35325	2.02852
ENSG00000075218	0.353723	2.48999
ENSG00000132383	0.354617	-3.37607
ENSG00000111445	0.354868	-2.50917
ENSG00000152990	0.354868	1.52734
ENSG00000157191	0.354868	-1.8787
ENSG00000079134	0.355369	-2.85203
ENSG00000094631	0.35537	3.23664
ENSG00000101574	0.35537	2.38722
ENSG00000134363	0.35537	-1.88846
ENSG00000136108	0.35537	2.55238
ENSG00000162928	0.35537	-2.31449
ENSG00000166165	0.35537	3.28062
ENSG00000197283	0.35537	2.14907
ENSG00000196235	0.356638	2.71587
ENSG00000105939	0.356909	-2.00692
ENSG00000157911	0.356909	2.86542
ENSG00000165934	0.356909	-2.49138
ENSG00000196369	0.356909	2.75988
ENSG00000233426	0.357197	-2.94227
ENSG00000118473	0.35821	1.85199
ENSG00000028116	0.358487	-2.48374
ENSG00000169429	0.358658	-2.56635
ENSG00000224531	0.358739	3.14219
ENSG00000086102	0.358838	-1.28343
ENSG00000109762	0.35918	3.11512
ENSG00000068400	0.359487	3.38535
ENSG00000082074	0.359487	2.69595
ENSG00000119403	0.359487	1.72331
ENSG00000165494	0.359487	1.51505
ENSG00000112877	0.362531	-2.8513
ENSG00000090889	0.362631	2.55604
ENSG00000047644	0.363095	2.09724
ENSG00000139880	0.363095	-2.36646
ENSG00000185920	0.363095	2.33702
ENSG00000259275	0.363095	-3.46067
ENSG00000144645	0.363489	-1.31139
ENSG00000011638	0.364095	3.15738
ENSG00000278962	0.364739	3.09135
ENSG00000114302	0.365206	-2.17734
ENSG00000151413	0.365889	3.61524
ENSG00000116120	0.365918	-2.23767
ENSG00000139718	0.366353	2.84302
ENSG00000246067	0.366353	2.04329
ENSG00000038210	0.366463	3.17094
ENSG00000105516	0.366463	2.10307
ENSG00000163535	0.366463	2.6754
ENSG00000162413	0.366765	1.45691
ENSG00000049192	0.369716	-2.75547
ENSG00000100201	0.3701	2.34144
ENSG00000166851	0.3701	1.8828
ENSG00000242498	0.371241	-1.57018
ENSG00000263753	0.371889	-2.82178
ENSG00000282057	0.371889	-3.28265
ENSG00000068650	0.373214	2.67006
ENSG00000076382	0.373214	2.74102
ENSG00000121716	0.373214	1.79482
ENSG00000140941	0.373214	-2.69992
ENSG00000156521	0.373214	2.48432
ENSG00000158411	0.373214	2.42664
ENSG00000167657	0.373214	2.23691
ENSG00000176463	0.373214	2.78218
ENSG00000143815	0.374057	2.42193
ENSG00000116350	0.374335	-2.90406
ENSG00000144320	0.374335	-2.0733
ENSG00000162745	0.374335	1.62891
ENSG00000182916	0.374335	2.41952
ENSG00000067560	0.37457	1.96886
ENSG00000115159	0.37457	-1.7745
ENSG00000136717	0.37457	2.46427
ENSG00000179094	0.37457	1.7587
ENSG00000198042	0.375767	-2.46119
ENSG00000214548	0.375767	1.69017
ENSG00000119397	0.377702	1.96331
ENSG00000130508	0.379415	-2.05713
ENSG00000077348	0.380853	2.11163
ENSG00000140259	0.380853	2.78718
ENSG00000127955	0.381091	2.90151
ENSG00000006125	0.381219	2.20589
ENSG00000100749	0.381219	-2.31868
ENSG00000164187	0.381219	3.05114
ENSG00000183287	0.381945	-2.355
ENSG00000041353	0.387076	3.47354
ENSG00000100504	0.387076	2.67349
ENSG00000233276	0.388968	-3.17572
ENSG00000087245	0.391009	1.54746
ENSG00000130147	0.391053	3.06433
ENSG00000151718	0.391053	-2.88086
ENSG00000198964	0.391053	-2.22337
ENSG00000115163	0.394849	1.91757
ENSG00000270231	0.394849	1.8123
ENSG00000124155	0.39654	-2.60389
ENSG00000125447	0.39654	1.94329
ENSG00000143228	0.398816	1.67824
ENSG00000196700	0.398816	1.85366
ENSG00000163938	0.401759	1.44484
ENSG00000148634	0.40205	-2.61343
ENSG00000107331	0.403307	-2.67647
ENSG00000168259	0.403307	2.7982
ENSG00000184867	0.403307	2.68549
ENSG00000182973	0.40331	-2.76795
ENSG00000169760	0.407866	1.60465
ENSG00000121039	0.408255	-2.00471
ENSG00000139687	0.408255	-2.92443
ENSG00000172893	0.408255	-1.33068
ENSG00000101911	0.409151	-1.68449
ENSG00000170485	0.409235	1.63577
ENSG00000034152	0.411608	-2.19107
ENSG00000111669	0.411608	2.1637
ENSG00000115993	0.411608	-2.22466
ENSG00000164465	0.411608	-2.18475
ENSG00000197818	0.411608	-2.59984
ENSG00000198517	0.411608	-2.35097
ENSG00000196072	0.411615	2.22011
ENSG00000181061	0.411904	-2.65993
ENSG00000103264	0.411935	2.48263
ENSG00000054118	0.412468	2.78957
ENSG00000179335	0.413299	1.09644
ENSG00000130313	0.414101	1.97931
ENSG00000176444	0.415335	2.44619
ENSG00000206538	0.415335	-2.35221
ENSG00000113580	0.415764	1.85358
ENSG00000273151	0.415764	2.54925
ENSG00000158864	0.416175	1.9678
ENSG00000105011	0.417819	-2.61887
ENSG00000070950	0.417986	-2.17977
ENSG00000197299	0.4182	-2.36165
ENSG00000278259	0.419826	-1.8971
ENSG00000232815	0.419958	-1.96194
ENSG00000050344	0.420407	-1.73365
ENSG00000131725	0.420407	-2.83724
ENSG00000167863	0.420407	2.62385
ENSG00000184465	0.420407	2.32792
ENSG00000011304	0.420957	-1.21815
ENSG00000107815	0.421759	2.01971
ENSG00000112335	0.421759	2.01602
ENSG00000118402	0.421759	2.67286
ENSG00000163660	0.421759	2.02769
ENSG00000136144	0.422411	-2.06465
ENSG00000150990	0.423074	1.99988
ENSG00000152558	0.423131	2.19497
ENSG00000100221	0.423305	2.24688
ENSG00000136710	0.424721	-2.51936
ENSG00000135913	0.424757	-1.42527
ENSG00000091436	0.424922	-2.14266
ENSG00000102878	0.424922	2.27454
ENSG00000058272	0.426819	-2.38148
ENSG00000100416	0.426922	2.43
ENSG00000179562	0.42779	2.63283
ENSG00000135446	0.429084	-1.48931
ENSG00000090006	0.429136	-3.18234
ENSG00000067167	0.431088	2.66595
ENSG00000090612	0.431088	-2.12772
ENSG00000105643	0.431088	-2.7626
ENSG00000112658	0.431088	2.32521
ENSG00000133302	0.431088	1.99064
ENSG00000136021	0.431088	2.23722
ENSG00000138376	0.431088	-2.47788
ENSG00000161677	0.433554	-2.65554
ENSG00000163322	0.433554	3.43682
ENSG00000114902	0.434191	2.27294
ENSG00000117899	0.434191	-2.07423
ENSG00000163479	0.434191	-2.52056
ENSG00000167191	0.434191	2.37288
ENSG00000187051	0.434191	2.1913
ENSG00000071794	0.43614	3.39327
ENSG00000214655	0.437487	-2.3199
ENSG00000135631	0.437847	2.24285
ENSG00000167615	0.437847	2.00597
ENSG00000183283	0.437847	1.89782
ENSG00000188342	0.437847	-1.93594
ENSG00000242265	0.437847	-2.22273
ENSG00000126226	0.438633	-1.83408
ENSG00000163545	0.438633	-2.45259
ENSG00000203993	0.438633	-2.01526
ENSG00000198910	0.439379	-1.27804
ENSG00000197563	0.439524	-2.14129
ENSG00000095321	0.439749	1.68332
ENSG00000105483	0.439749	1.55037
ENSG00000129932	0.439749	2.81414
ENSG00000159208	0.439749	0.929324
ENSG00000069998	0.439783	1.36665
ENSG00000136122	0.439783	1.33842
ENSG00000157036	0.439783	-1.92434
ENSG00000166333	0.439783	2.25255
ENSG00000188042	0.439783	1.14438
ENSG00000107897	0.439816	-2.15501
ENSG00000108679	0.440163	-2.48893
ENSG00000130254	0.441065	2.13755
ENSG00000160299	0.441506	1.49381
ENSG00000077254	0.441588	1.87068
ENSG00000100650	0.441588	2.01826
ENSG00000102178	0.441588	2.12085
ENSG00000117155	0.441588	1.87057
ENSG00000121236	0.441588	2.35216
ENSG00000178033	0.441997	-1.81155
ENSG00000184194	0.442193	2.34458
ENSG00000138107	0.443097	2.36073
ENSG00000073536	0.44355	1.81386
ENSG00000127418	0.44355	-2.5245
ENSG00000183775	0.445098	-2.51067
ENSG00000112339	0.445818	2.55994
ENSG00000134779	0.446056	-2.58441
ENSG00000171603	0.446056	2.03634
ENSG00000286619	0.446204	2.40711
ENSG00000005075	0.446235	2.12647
ENSG00000132535	0.446235	2.59361
ENSG00000138398	0.446235	1.76714
ENSG00000214717	0.446235	1.38353
ENSG00000124145	0.446684	-1.76595
ENSG00000135341	0.446684	2.36122
ENSG00000173011	0.446684	1.62144
ENSG00000173621	0.446684	2.59913
ENSG00000178878	0.446684	1.71804
ENSG00000242028	0.447032	2.29114
ENSG00000185252	0.447098	2.16005
ENSG00000129515	0.447159	1.71479
ENSG00000067191	0.448256	2.44271
ENSG00000119927	0.448256	-2.09653
ENSG00000244560	0.448256	2.6204
ENSG00000188312	0.449438	-2.14467
ENSG00000182768	0.450613	2.63532
ENSG00000144824	0.451315	-1.86858
ENSG00000049860	0.451705	1.55574
ENSG00000132591	0.451705	3.28325
ENSG00000187741	0.45319	-2.73092
ENSG00000105426	0.455295	2.3477
ENSG00000133794	0.455295	0.72799
ENSG00000153044	0.455295	-2.40678
ENSG00000155660	0.455295	-2.17011
ENSG00000175061	0.455295	-2.6906
ENSG00000267100	0.455295	2.02437
ENSG00000272734	0.455295	2.52011
ENSG00000064545	0.457417	2.56704
ENSG00000198108	0.457417	-2.95047
ENSG00000179743	0.45787	2.51775
ENSG00000114648	0.460878	2.26386
ENSG00000163964	0.460878	-2.10474
ENSG00000105419	0.461177	-2.24036
ENSG00000151923	0.461271	-1.71834
ENSG00000136295	0.461649	1.89406
ENSG00000225200	0.461649	2.11899
ENSG00000176946	0.461983	1.72453
ENSG00000186716	0.462643	2.5743
ENSG00000131002	0.463371	2.43421
ENSG00000104969	0.463449	2.83896
ENSG00000143653	0.463449	1.76859
ENSG00000091483	0.463663	-2.00947
ENSG00000022840	0.464112	2.62981
ENSG00000255248	0.464112	-1.98499
ENSG00000130270	0.464174	1.15828
ENSG00000108528	0.464971	1.93296
ENSG00000160285	0.465702	-1.59448
ENSG00000182173	0.466295	1.26595
ENSG00000274750	0.466307	-2.48221
ENSG00000280254	0.466307	-2.80852
ENSG00000115419	0.467133	1.8618
ENSG00000105223	0.467623	-2.33266
ENSG00000196616	0.468166	-2.28627
ENSG00000105722	0.468196	1.59318
ENSG00000148343	0.46829	-2.1863
ENSG00000157168	0.46829	-1.91323
ENSG00000246705	0.46829	-2.0419
ENSG00000081014	0.471013	-2.93757
ENSG00000050405	0.472903	-1.45063
ENSG00000196417	0.473026	-2.61595
ENSG00000110066	0.47348	-2.34316
ENSG00000254837	0.474419	-2.50476
ENSG00000105656	0.474613	2.33297
ENSG00000011275	0.476651	1.72088
ENSG00000105671	0.476675	1.9306
ENSG00000133110	0.476675	-2.13059
ENSG00000140937	0.476675	-1.74208
ENSG00000142945	0.476675	1.70495
ENSG00000170846	0.476675	2.3248
ENSG00000109445	0.476724	2.23764
ENSG00000090266	0.47864	2.0403
ENSG00000100918	0.47931	1.3451
ENSG00000078061	0.480197	2.34815
ENSG00000125637	0.48093	2.78453
ENSG00000153944	0.48289	1.25346
ENSG00000119041	0.483047	2.44529
ENSG00000101447	0.483156	1.66457
ENSG00000138867	0.483156	1.57136
ENSG00000149054	0.483156	-1.36083
ENSG00000175193	0.483156	2.18289
ENSG00000197312	0.483156	1.92984
ENSG00000141198	0.483584	2.29619
ENSG00000153250	0.483716	-1.64659
ENSG00000166166	0.483976	1.82011
ENSG00000112667	0.48648	2.05314
ENSG00000196652	0.487043	1.92292
ENSG00000152952	0.488479	-2.11047
ENSG00000134250	0.488496	1.73057
ENSG00000135778	0.488496	-2.75903
ENSG00000141232	0.488496	-1.85432
ENSG00000174903	0.488496	2.17849
ENSG00000112514	0.488886	-2.53451
ENSG00000198563	0.488886	2.14717
ENSG00000246089	0.488886	2.30766
ENSG00000162408	0.489433	-1.87418
ENSG00000135473	0.490193	1.92426
ENSG00000047315	0.491663	-1.83788
ENSG00000174099	0.494283	-2.49426
ENSG00000126709	0.495066	-2.04578
ENSG00000136238	0.495066	-1.75199
ENSG00000138381	0.495066	-1.54766
ENSG00000139438	0.495066	1.39053
ENSG00000144802	0.495066	-1.79449
ENSG00000165724	0.495066	1.49212
ENSG00000180964	0.495066	2.65979
ENSG00000117298	0.495291	-1.55427
ENSG00000138814	0.495291	2.18361
ENSG00000273136	0.495291	2.05503
ENSG00000109436	0.49575	1.16761
ENSG00000118985	0.49575	-1.77803
ENSG00000132356	0.49575	-1.29921
ENSG00000151276	0.49575	1.98017
ENSG00000197324	0.49575	-2.31959
ENSG00000112186	0.496115	2.10307
ENSG00000133315	0.496115	1.58761
ENSG00000174804	0.496115	2.93195
ENSG00000144468	0.49658	1.27635
ENSG00000160097	0.49658	-2.12579
ENSG00000189042	0.49658	-2.3419
ENSG00000125520	0.496877	1.65653
ENSG00000126653	0.498453	-1.98992
ENSG00000130203	0.498453	2.01633
ENSG00000163528	0.498453	2.15101
ENSG00000171448	0.498453	-1.77451
ENSG00000126903	0.498552	2.12576
ENSG00000175283	0.498639	1.65753
ENSG00000198363	0.499815	-2.12369
ENSG00000105778	0.501326	1.93818
ENSG00000129195	0.501326	1.94774
ENSG00000180011	0.501326	1.68759
ENSG00000168395	0.502373	1.80178
ENSG00000196428	0.50276	-2.50027
ENSG00000088448	0.503355	2.46547
ENSG00000163297	0.503942	-1.07318
ENSG00000121067	0.505161	-1.50236
ENSG00000073910	0.505565	2.52224
ENSG00000125089	0.505565	1.96442
ENSG00000214021	0.505565	2.1903
ENSG00000138311	0.508741	-2.19357
ENSG00000196976	0.508926	1.88161
ENSG00000105499	0.509376	-2.45892
ENSG00000159147	0.509376	-1.92381
ENSG00000185414	0.509376	-2.06762
ENSG00000275131	0.509376	2.23889
ENSG00000121361	0.509411	-1.92197
ENSG00000133641	0.509864	2.11005
ENSG00000159140	0.512038	1.81155
ENSG00000145365	0.513002	-2.01738
ENSG00000135535	0.513206	1.88797
ENSG00000079785	0.513746	1.58266
ENSG00000103994	0.513746	-2.0904
ENSG00000077147	0.51577	1.92836
ENSG00000104915	0.515868	1.95525
ENSG00000135049	0.515868	-1.96858
ENSG00000070047	0.515993	2.01119
ENSG00000146267	0.515993	-2.02845
ENSG00000160991	0.515993	1.92995
ENSG00000198924	0.517186	-2.0616
ENSG00000177030	0.518282	1.47087
ENSG00000088682	0.519505	1.94685
ENSG00000117308	0.519505	-2.14677
ENSG00000117318	0.519505	-2.37123
ENSG00000137210	0.520021	-1.66602
ENSG00000170854	0.520021	1.17133
ENSG00000185697	0.520607	-1.76595
ENSG00000213347	0.521485	1.10594
ENSG00000156398	0.522636	-2.125
ENSG00000107290	0.523418	1.94681
ENSG00000137812	0.524793	2.28261
ENSG00000185361	0.525648	0.978192
ENSG00000079277	0.525659	1.52493
ENSG00000116815	0.525659	2.26837
ENSG00000165102	0.525659	1.28182
ENSG00000177707	0.525659	1.42452
ENSG00000115524	0.526032	1.60369
ENSG00000177508	0.526032	2.12711
ENSG00000087303	0.527069	-2.50499
ENSG00000113391	0.527069	-1.71294
ENSG00000233806	0.527069	2.24756
ENSG00000131043	0.529009	2.5384
ENSG00000244187	0.529009	-2.13826
ENSG00000123737	0.529671	-1.74562
ENSG00000106733	0.531162	-1.76655
ENSG00000113569	0.53122	-2.25154
ENSG00000145050	0.53122	-2.12082
ENSG00000186814	0.532002	2.13771
ENSG00000100823	0.532062	-3.07009
ENSG00000127481	0.532062	0.848582
ENSG00000138180	0.532062	2.15964
ENSG00000186111	0.532441	1.81983
ENSG00000186193	0.535249	2.04492
ENSG00000136897	0.535715	1.5948
ENSG00000171160	0.535715	-1.94394
ENSG00000186866	0.535715	-1.85592
ENSG00000036054	0.535952	2.33618
ENSG00000102471	0.535952	2.39931
ENSG00000103227	0.535952	-2.50717
ENSG00000130024	0.535952	1.9962
ENSG00000165832	0.535952	-1.94674
ENSG00000137834	0.535975	2.17344
ENSG00000078674	0.536592	1.8862
ENSG00000164190	0.536592	1.89873
ENSG00000136237	0.537438	-2.51778
ENSG00000213160	0.537438	-0.949386
ENSG00000251322	0.537438	-1.99344
ENSG00000131845	0.537817	-2.43726
ENSG00000163714	0.537879	-2.06267
ENSG00000174177	0.537879	1.87124
ENSG00000114346	0.537901	2.01631
ENSG00000157350	0.538174	-1.67682
ENSG00000167658	0.538174	-2.54498
ENSG00000158483	0.538217	-1.66782
ENSG00000013573	0.538348	-1.66495
ENSG00000118200	0.538348	1.56791
ENSG00000150457	0.538348	2.26533
ENSG00000065485	0.53854	-2.07218
ENSG00000162650	0.53854	1.83869
ENSG00000171604	0.53854	1.76127
ENSG00000026103	0.538722	-1.8547
ENSG00000197448	0.538722	1.94692
ENSG00000178719	0.539602	-1.92809
ENSG00000168591	0.540194	0.781417
ENSG00000186594	0.540194	1.79546
ENSG00000221823	0.54037	1.88636
ENSG00000058729	0.540847	1.31347
ENSG00000100263	0.540847	2.06049
ENSG00000169682	0.540847	2.36673
ENSG00000059122	0.541726	-2.23748
ENSG00000166532	0.541726	1.78865
ENSG00000118257	0.542644	1.73053
ENSG00000079387	0.542739	-1.77981
ENSG00000112308	0.542739	1.31567
ENSG00000138346	0.542739	-1.38082
ENSG00000138778	0.542739	1.54888
ENSG00000159423	0.542739	-2.24231
ENSG00000177606	0.542739	1.28059
ENSG00000183527	0.542739	1.7061
ENSG00000198089	0.542739	2.0834
ENSG00000230453	0.542739	2.22842
ENSG00000274925	0.542739	2.25542
ENSG00000275457	0.542739	1.75144
ENSG00000099821	0.54325	1.231
ENSG00000147251	0.54325	1.78793
ENSG00000184083	0.543304	-0.906023
ENSG00000074695	0.54353	2.28449
ENSG00000112029	0.54353	-1.57461
ENSG00000118620	0.545202	1.90175
ENSG00000089916	0.546308	1.64224
ENSG00000004660	0.546678	0.80794
ENSG00000126787	0.547891	1.40623
ENSG00000155846	0.547891	-2.28887
ENSG00000163083	0.547891	-1.72255
ENSG00000135596	0.548409	1.52337
ENSG00000100519	0.549119	1.9339
ENSG00000175063	0.552385	1.46214
ENSG00000152484	0.553539	2.1787
ENSG00000153721	0.553539	2.54285
ENSG00000169126	0.553539	2.2498
ENSG00000169379	0.553539	1.71558
ENSG00000145293	0.553976	1.69117
ENSG00000164292	0.553976	2.06769
ENSG00000092853	0.554015	-1.34289
ENSG00000075826	0.554036	1.9271
ENSG00000154447	0.554036	-2.39204
ENSG00000120942	0.554576	1.73194
ENSG00000134287	0.554576	1.54503
ENSG00000135842	0.554576	1.86064
ENSG00000149636	0.554576	-1.36593
ENSG00000154229	0.554576	1.45396
ENSG00000177311	0.554576	2.49971
ENSG00000188976	0.554576	1.76554
ENSG00000205352	0.554576	1.46255
ENSG00000120658	0.555211	2.05469
ENSG00000130821	0.555211	1.0875
ENSG00000131873	0.555211	-1.54062
ENSG00000134371	0.555211	-1.8656
ENSG00000165886	0.555211	2.16686
ENSG00000182208	0.555211	-1.97397
ENSG00000110921	0.557669	-1.23013
ENSG00000153815	0.557669	-2.14431
ENSG00000166900	0.557669	-2.1566
ENSG00000183751	0.557669	1.95239
ENSG00000228232	0.557669	1.69288
ENSG00000250305	0.557669	1.26111
ENSG00000148296	0.557673	1.46719
ENSG00000120322	0.557924	1.91927
ENSG00000101773	0.559374	-1.22393
ENSG00000152894	0.559374	1.78691
ENSG00000168268	0.559374	1.2815
ENSG00000151150	0.559538	2.68591
ENSG00000122435	0.559736	2.17589
ENSG00000152133	0.559736	-2.17584
ENSG00000198898	0.560141	-1.89733
ENSG00000128951	0.561563	-1.82811
ENSG00000163281	0.562509	-1.71482
ENSG00000115641	0.563209	-1.98587
ENSG00000137941	0.563539	1.11498
ENSG00000151414	0.563539	-1.72009
ENSG00000142937	0.5636	-1.97973
ENSG00000114859	0.566105	1.54677
ENSG00000109111	0.566532	1.11481
ENSG00000142102	0.566648	2.02259
ENSG00000223705	0.567395	2.18286
ENSG00000142330	0.567995	-2.29312
ENSG00000156970	0.569395	2.07023
ENSG00000204237	0.569395	-1.73591
ENSG00000069431	0.569873	2.30413
ENSG00000049130	0.570045	0.844525
ENSG00000068001	0.570045	1.98588
ENSG00000197774	0.571484	-2.30127
ENSG00000004897	0.57162	2.10972
ENSG00000086475	0.57162	1.79943
ENSG00000134046	0.57162	-2.24367
ENSG00000164930	0.57162	2.35621
ENSG00000078687	0.571698	1.90649
ENSG00000100034	0.571698	2.13599
ENSG00000100442	0.571698	2.33466
ENSG00000107104	0.571698	-1.7659
ENSG00000119953	0.571698	-1.71474
ENSG00000136051	0.571698	1.91019
ENSG00000158109	0.571698	-2.11818
ENSG00000167548	0.571698	1.28644
ENSG00000183098	0.571698	-1.24564
ENSG00000011295	0.572019	1.38056
ENSG00000176401	0.572208	-1.97935
ENSG00000065357	0.572561	1.696
ENSG00000127837	0.572561	1.89256
ENSG00000136436	0.572561	1.35986
ENSG00000234545	0.573567	-2.11845
ENSG00000087076	0.574795	-1.38848
ENSG00000101680	0.574795	1.12736
ENSG00000132436	0.574795	-1.32865
ENSG00000141837	0.574795	-1.4189
ENSG00000163655	0.574795	-1.22432
ENSG00000166188	0.574795	1.6171
ENSG00000266338	0.574795	0.77664
ENSG00000234616	0.576247	1.61441
ENSG00000288920	0.57635	-2.42644
ENSG00000146963	0.576508	-1.15493
ENSG00000089737	0.57695	-1.40811
ENSG00000066084	0.577896	-1.21603
ENSG00000285796	0.577896	2.2348
ENSG00000197622	0.578255	1.52367
ENSG00000187109	0.57939	1.39191
ENSG00000121057	0.579401	-0.875261
ENSG00000065427	0.579776	1.67706
ENSG00000104356	0.579776	1.77691
ENSG00000110315	0.579776	1.79895
ENSG00000129317	0.579776	-2.10048
ENSG00000134690	0.579776	1.55697
ENSG00000114686	0.581131	1.29015
ENSG00000138119	0.581131	1.44926
ENSG00000160200	0.581131	-1.6162
ENSG00000170919	0.581131	1.42717
ENSG00000008853	0.581816	-1.65923
ENSG00000278619	0.581816	1.83114
ENSG00000171574	0.582092	-1.75336
ENSG00000088832	0.584077	-1.36105
ENSG00000242588	0.584578	1.88629
ENSG00000278540	0.585148	-1.37042
ENSG00000059588	0.585884	1.46314
ENSG00000070785	0.587094	-1.29453
ENSG00000072849	0.587094	-1.8227
ENSG00000104549	0.587094	-1.58378
ENSG00000118412	0.587094	1.5589
ENSG00000119559	0.587094	1.88444
ENSG00000134186	0.587094	-1.24165
ENSG00000151148	0.587094	1.53914
ENSG00000157212	0.587094	-1.10996
ENSG00000158122	0.587094	-2.25194
ENSG00000162889	0.587094	1.88642
ENSG00000163428	0.587094	-1.05261
ENSG00000167996	0.587094	1.29525
ENSG00000168806	0.587094	1.4358
ENSG00000170581	0.587094	1.49395
ENSG00000182749	0.587094	1.45477
ENSG00000185989	0.587094	1.39016
ENSG00000280734	0.587094	1.94962
ENSG00000288701	0.587094	1.94263
ENSG00000108465	0.587286	1.79291
ENSG00000143398	0.588344	-1.64825
ENSG00000167674	0.588344	2.27441
ENSG00000250182	0.588344	1.87175
ENSG00000145014	0.589113	1.14512
ENSG00000183808	0.589113	-1.76099
ENSG00000197579	0.590145	-1.70911
ENSG00000089091	0.590686	1.78769
ENSG00000077157	0.590754	1.40805
ENSG00000276023	0.590754	-1.6257
ENSG00000187123	0.5917	1.07965
ENSG00000113161	0.591808	-1.34752
ENSG00000187522	0.592114	-2.09281
ENSG00000111752	0.592144	2.2507
ENSG00000075426	0.592574	-1.27961
ENSG00000188522	0.592574	1.29045
ENSG00000148411	0.593224	1.35218
ENSG00000155313	0.593276	1.50051
ENSG00000152104	0.594742	-1.49167
ENSG00000156671	0.594742	1.6244
ENSG00000196914	0.594742	1.81078
ENSG00000197747	0.594818	-1.41974
ENSG00000185485	0.595165	-1.74991
ENSG00000157306	0.595877	1.61689
ENSG00000166848	0.595877	1.30537
ENSG00000129116	0.596497	2.24491
ENSG00000273117	0.596537	-2.0744
ENSG00000112039	0.597519	1.48765
ENSG00000118922	0.597519	1.78432
ENSG00000136682	0.597519	-1.54012
ENSG00000145147	0.597519	-0.849504
ENSG00000164054	0.599389	-1.70541
ENSG00000143183	0.599448	1.67676
ENSG00000169946	0.600606	1.76411
ENSG00000181555	0.600606	-2.25418
ENSG00000071054	0.60197	0.974223
ENSG00000100372	0.60218	-1.70058
ENSG00000116688	0.602689	1.74468
ENSG00000236144	0.602689	-1.60304
ENSG00000145040	0.603154	-1.53834
ENSG00000145391	0.603154	0.994643
ENSG00000164535	0.603154	-1.72474
ENSG00000166396	0.603154	-1.7879
ENSG00000198521	0.603154	-1.38345
ENSG00000213305	0.603154	2.00677
ENSG00000143889	0.603703	1.04504
ENSG00000160685	0.603703	-1.67483
ENSG00000163781	0.603703	-1.7219
ENSG00000183579	0.603703	-1.54421
ENSG00000259943	0.603703	-1.82169
ENSG00000289586	0.603703	1.61926
ENSG00000123415	0.604301	1.79336
ENSG00000163661	0.604301	-1.60366
ENSG00000148297	0.60473	1.78302
ENSG00000198824	0.60473	-1.17276
ENSG00000057757	0.605717	-1.87929
ENSG00000129353	0.606225	1.46597
ENSG00000164104	0.606242	0.701426
ENSG00000116580	0.607849	1.22128
ENSG00000145349	0.607849	-1.42561
ENSG00000043143	0.608502	-1.08438
ENSG00000079819	0.608502	1.02003
ENSG00000082213	0.608502	-1.79469
ENSG00000093010	0.608502	-1.83366
ENSG00000131378	0.608502	-1.69589
ENSG00000146457	0.608502	-1.78392
ENSG00000184922	0.608901	-1.79427
ENSG00000087586	0.609673	1.16147
ENSG00000111670	0.609673	1.50181
ENSG00000143977	0.610078	1.9752
ENSG00000106266	0.61022	-1.82209
ENSG00000103642	0.610305	1.78167
ENSG00000105221	0.610305	1.9628
ENSG00000116747	0.610305	1.59155
ENSG00000147799	0.610305	1.25918
ENSG00000151116	0.610305	1.46681
ENSG00000197763	0.610305	-1.42463
ENSG00000054523	0.610485	-1.66219
ENSG00000176422	0.610485	1.97656
ENSG00000197746	0.610485	-1.50043
ENSG00000108379	0.612045	-1.27179
ENSG00000014138	0.612397	-1.58477
ENSG00000070961	0.612397	1.29923
ENSG00000113583	0.612397	1.68884
ENSG00000134824	0.612397	-1.11832
ENSG00000164329	0.612397	1.32795
ENSG00000185024	0.612397	-1.45793
ENSG00000187955	0.612397	-1.71234
ENSG00000099899	0.613296	1.4798
ENSG00000115966	0.613296	1.37685
ENSG00000133316	0.613296	1.34805
ENSG00000140740	0.613941	-2.00961
ENSG00000115840	0.61527	0.901122
ENSG00000116717	0.61527	-1.36044
ENSG00000137310	0.61527	-1.52935
ENSG00000187764	0.61527	1.51749
ENSG00000250251	0.61527	1.38564
ENSG00000173473	0.615829	0.991239
ENSG00000040933	0.615865	-1.84991
ENSG00000155666	0.615865	1.54986
ENSG00000013563	0.616021	-1.63906
ENSG00000120337	0.616021	1.13819
ENSG00000145545	0.616021	1.30073
ENSG00000164808	0.616021	1.71242
ENSG00000167965	0.616021	1.98613
ENSG00000100350	0.616798	-1.24584
ENSG00000197070	0.616798	-1.45727
ENSG00000131323	0.617405	0.927428
ENSG00000027001	0.618045	-1.38521
ENSG00000001167	0.618283	-1.65168
ENSG00000110274	0.619195	1.25635
ENSG00000084733	0.621317	1.05651
ENSG00000248092	0.621317	-1.36158
ENSG00000011007	0.622103	1.55683
ENSG00000198901	0.623003	1.35363
ENSG00000169032	0.623146	-1.6166
ENSG00000091651	0.623825	-1.62943
ENSG00000088854	0.624486	1.25737
ENSG00000108523	0.625541	-1.79481
ENSG00000122042	0.62598	1.29897
ENSG00000155111	0.626584	1.27878
ENSG00000109944	0.626673	-1.65791
ENSG00000103502	0.626751	-1.30903
ENSG00000112414	0.626751	0.904304
ENSG00000007392	0.62757	1.71021
ENSG00000120253	0.62757	-1.59258
ENSG00000145907	0.62757	-1.36939
ENSG00000184014	0.62757	0.897779
ENSG00000171453	0.629089	1.62816
ENSG00000249264	0.629559	1.54882
ENSG00000171320	0.629987	-1.0038
ENSG00000083520	0.630508	1.21302
ENSG00000134717	0.630508	-1.36522
ENSG00000184216	0.630508	1.36427
ENSG00000143870	0.631012	-1.45489
ENSG00000145817	0.631012	-1.41884
ENSG00000173914	0.631012	1.82342
ENSG00000224877	0.631012	2.75428
ENSG00000106785	0.632303	-1.617
ENSG00000115935	0.632303	2.20376
ENSG00000120885	0.632303	-1.47873
ENSG00000132600	0.632303	-2.05437
ENSG00000136720	0.632303	1.23664
ENSG00000159593	0.632303	-0.986984
ENSG00000161204	0.632303	1.95298
ENSG00000177383	0.632303	1.05333
ENSG00000179218	0.632303	-1.04626
ENSG00000214357	0.632303	0.912727
ENSG00000184564	0.63285	1.75536
ENSG00000123352	0.633172	-1.42851
ENSG00000063854	0.633175	1.87958
ENSG00000162063	0.633175	1.00623
ENSG00000164167	0.633175	1.77904
ENSG00000175854	0.633175	1.65705
ENSG00000196411	0.633175	-1.64519
ENSG00000138685	0.633176	1.003
ENSG00000135316	0.633183	1.79812
ENSG00000101940	0.633622	-1.87522
ENSG00000100422	0.633753	1.20187
ENSG00000173418	0.634668	1.43598
ENSG00000080493	0.635022	0.956303
ENSG00000162604	0.635022	-2.14203
ENSG00000163558	0.635022	1.69429
ENSG00000171425	0.635022	-1.82357
ENSG00000181104	0.635022	0.925666
ENSG00000214274	0.635022	2.00263
ENSG00000269343	0.635022	-1.382
ENSG00000152256	0.635394	1.62642
ENSG00000105983	0.639397	1.51741
ENSG00000102547	0.639425	-1.15897
ENSG00000120370	0.639425	1.60272
ENSG00000123505	0.639425	-1.3537
ENSG00000134222	0.639425	0.908257
ENSG00000275835	0.639425	-1.08417
ENSG00000177570	0.64233	1.99936
ENSG00000213186	0.64233	0.843905
ENSG00000225783	0.64233	1.51562
ENSG00000153317	0.642541	-1.33438
ENSG00000137413	0.643245	1.22099
ENSG00000197355	0.643245	-1.70905
ENSG00000165046	0.64353	1.33177
ENSG00000049541	0.645649	-1.46321
ENSG00000272711	0.645649	1.30479
ENSG00000100711	0.645674	-1.55132
ENSG00000128059	0.645674	-1.10468
ENSG00000134574	0.645674	1.05632
ENSG00000182180	0.646881	-1.3585
ENSG00000125968	0.649627	-1.30083
ENSG00000171914	0.650193	-1.47111
ENSG00000108588	0.650434	1.76042
ENSG00000186897	0.650526	1.84946
ENSG00000220785	0.651373	1.36678
ENSG00000175305	0.651785	-0.583474
ENSG00000146872	0.652222	-1.04114
ENSG00000065809	0.653223	1.33921
ENSG00000168685	0.655	-1.27743
ENSG00000249471	0.655	-0.884252
ENSG00000136783	0.655543	-1.43775
ENSG00000159348	0.656252	1.22203
ENSG00000100028	0.656553	-1.45876
ENSG00000100441	0.656553	1.51433
ENSG00000144744	0.656553	-1.82884
ENSG00000156531	0.656607	1.58079
ENSG00000181915	0.657978	1.24942
ENSG00000182901	0.657978	-1.43646
ENSG00000054654	0.660104	1.25469
ENSG00000111052	0.660104	1.03653
ENSG00000156469	0.660119	-1.61791
ENSG00000116675	0.663767	-1.78835
ENSG00000196116	0.663833	-1.4839
ENSG00000134874	0.665392	1.78808
ENSG00000138071	0.665392	-1.55646
ENSG00000141012	0.665392	-1.90419
ENSG00000156232	0.666423	-1.81002
ENSG00000166508	0.666423	-1.29085
ENSG00000106348	0.667776	1.59031
ENSG00000111647	0.667827	-1.16061
ENSG00000164548	0.667827	-0.867555
ENSG00000088387	0.668108	-1.17407
ENSG00000151746	0.668108	-1.68851
ENSG00000168952	0.668108	-1.34613
ENSG00000011332	0.668145	-1.73077
ENSG00000204592	0.669113	-1.60561
ENSG00000184640	0.672859	1.34107
ENSG00000147162	0.672982	1.4489
ENSG00000152520	0.67355	1.55668
ENSG00000114316	0.674138	1.46193
ENSG00000116273	0.67499	1.31371
ENSG00000181163	0.675244	-1.65683
ENSG00000144909	0.675985	-1.33109
ENSG00000101974	0.678821	1.35137
ENSG00000139190	0.678821	1.61487
ENSG00000153823	0.678821	-1.23569
ENSG00000186566	0.681745	-2.13077
ENSG00000064042	0.683694	1.07174
ENSG00000101350	0.683694	1.36312
ENSG00000107562	0.683694	-1.8993
ENSG00000133812	0.683694	1.17588
ENSG00000144647	0.683694	1.32577
ENSG00000177613	0.683694	-1.0027
ENSG00000188641	0.683694	0.945826
ENSG00000241288	0.683694	1.60641
ENSG00000255737	0.683694	1.62858
ENSG00000054611	0.684421	-1.77966
ENSG00000099995	0.684421	-1.30324
ENSG00000102174	0.684421	1.49529
ENSG00000110400	0.684421	-1.53155
ENSG00000111845	0.684421	-1.14008
ENSG00000144596	0.684421	1.24486
ENSG00000155903	0.684421	-1.45757
ENSG00000165912	0.684421	1.36019
ENSG00000176155	0.684421	1.44165
ENSG00000197050	0.684421	-1.67782
ENSG00000032444	0.685078	-1.23362
ENSG00000117748	0.685078	1.29315
ENSG00000136754	0.685078	1.24163
ENSG00000141574	0.685078	-1.34367
ENSG00000172260	0.685078	1.43819
ENSG00000175203	0.685078	1.64896
ENSG00000112511	0.68545	-0.886228
ENSG00000149679	0.68545	-1.34581
ENSG00000185499	0.68545	1.57247
ENSG00000145781	0.685759	-1.30696
ENSG00000179111	0.685759	-1.60367
ENSG00000151572	0.685904	1.10769
ENSG00000132323	0.687501	1.34481
ENSG00000138641	0.687501	1.29782
ENSG00000221963	0.687501	1.50412
ENSG00000090621	0.687656	-1.10626
ENSG00000081791	0.688365	1.72986
ENSG00000153395	0.688387	1.59059
ENSG00000122390	0.689563	-1.50984
ENSG00000163935	0.689563	-1.4629
ENSG00000198830	0.689563	-1.80464
ENSG00000112081	0.69009	-1.4743
ENSG00000171793	0.69009	-1.56556
ENSG00000270629	0.690173	1.11073
ENSG00000181751	0.690242	-1.33727
ENSG00000106829	0.691065	-1.80047
ENSG00000070081	0.691146	1.20983
ENSG00000130299	0.693009	-1.68646
ENSG00000176170	0.693009	1.26032
ENSG00000049449	0.694708	-1.45277
ENSG00000125753	0.694916	1.5587
ENSG00000132549	0.694916	1.36723
ENSG00000131080	0.695651	1.02212
ENSG00000139726	0.695651	1.61183
ENSG00000144724	0.695651	-1.25414
ENSG00000149380	0.695651	1.36917
ENSG00000204253	0.695651	1.65381
ENSG00000261485	0.695651	-1.66274
ENSG00000035687	0.696177	-1.33138
ENSG00000166750	0.696719	1.5229
ENSG00000135521	0.697378	-1.5025
ENSG00000013016	0.697482	-1.52321
ENSG00000101413	0.697482	-1.24854
ENSG00000140526	0.697482	1.17221
ENSG00000112972	0.698364	-1.00088
ENSG00000130303	0.698364	-1.2023
ENSG00000134294	0.698364	1.39188
ENSG00000154978	0.699433	-1.34679
ENSG00000189067	0.699433	1.53497
ENSG00000198056	0.699433	-0.944853
ENSG00000255031	0.699433	1.54715
ENSG00000064547	0.700926	1.35967
ENSG00000120733	0.701417	-1.33949
ENSG00000116984	0.701763	-1.16792
ENSG00000177595	0.701763	1.45182
ENSG00000137804	0.701897	1.34294
ENSG00000006118	0.70228	1.32167
ENSG00000044459	0.70228	1.16519
ENSG00000068323	0.70228	1.17812
ENSG00000083168	0.70228	-1.31757
ENSG00000112769	0.70228	-1.90779
ENSG00000114491	0.70228	1.14271
ENSG00000122376	0.70228	1.2005
ENSG00000130164	0.70228	-0.638449
ENSG00000168961	0.70228	-1.30692
ENSG00000169258	0.70228	1.37322
ENSG00000174371	0.70228	-0.74899
ENSG00000196712	0.70228	1.47244
ENSG00000164086	0.702391	-1.60326
ENSG00000236017	0.702391	-1.26174
ENSG00000103888	0.702934	-0.999289
ENSG00000142089	0.702934	-1.12921
ENSG00000134697	0.702974	0.914639
ENSG00000132405	0.703043	0.94131
ENSG00000086189	0.706124	-1.31855
ENSG00000173706	0.706383	1.64733
ENSG00000180914	0.706383	-1.61198
ENSG00000163071	0.706881	1.33749
ENSG00000048052	0.707587	1.61284
ENSG00000139921	0.707587	1.57918
ENSG00000145833	0.707587	-1.61188
ENSG00000119537	0.707758	1.35417
ENSG00000023318	0.707997	-1.61205
ENSG00000177302	0.707997	-1.17598
ENSG00000212719	0.710958	0.928207
ENSG00000073111	0.711109	0.753937
ENSG00000113460	0.711109	1.23153
ENSG00000143469	0.711109	-1.12137
ENSG00000168924	0.711109	1.2093
ENSG00000205683	0.711109	-1.2174
ENSG00000114650	0.711318	0.831496
ENSG00000117226	0.71171	-1.39466
ENSG00000144711	0.71198	0.636601
ENSG00000182944	0.712514	-0.660728
ENSG00000185608	0.712514	1.69144
ENSG00000160007	0.713064	-1.32385
ENSG00000138078	0.713533	-1.18592
ENSG00000116396	0.713878	1.58364
ENSG00000130520	0.714111	1.45367
ENSG00000276248	0.714111	1.35914
ENSG00000011021	0.714555	0.984871
ENSG00000164211	0.714833	1.05045
ENSG00000111530	0.715423	0.780073
ENSG00000130713	0.715423	-1.50956
ENSG00000226950	0.715423	1.00215
ENSG00000041982	0.715582	1.47365
ENSG00000068912	0.715582	-1.77583
ENSG00000100225	0.715582	1.19778
ENSG00000223768	0.715582	-0.888925
ENSG00000012232	0.715676	-1.49108
ENSG00000181544	0.715676	-1.4608
ENSG00000198860	0.715676	-0.952127
ENSG00000232656	0.715676	1.27538
ENSG00000196642	0.716191	1.44295
ENSG00000157106	0.720057	0.759112
ENSG00000165650	0.720057	-1.02551
ENSG00000025156	0.721434	-0.973784
ENSG00000141385	0.721434	-1.09286
ENSG00000147883	0.721434	0.914839
ENSG00000162961	0.722362	1.49733
ENSG00000281490	0.722487	0.980402
ENSG00000102743	0.722527	1.11819
ENSG00000022277	0.723485	-1.2372
ENSG00000144891	0.723485	1.39882
ENSG00000198768	0.723679	1.18909
ENSG00000118515	0.723794	1.35807
ENSG00000172159	0.724238	1.04445
ENSG00000197937	0.724351	-1.26593
ENSG00000137962	0.725243	-0.720123
ENSG00000179833	0.725522	-0.807287
ENSG00000117597	0.72555	-0.746852
ENSG00000126821	0.72555	1.52218
ENSG00000179958	0.72555	-1.06851
ENSG00000213398	0.72555	1.17409
ENSG00000155189	0.725683	-1.37768
ENSG00000097046	0.726495	-1.26542
ENSG00000002549	0.727016	-1.28303
ENSG00000063601	0.727016	1.31462
ENSG00000089289	0.727016	-1.36193
[truncated: 1,375 more rows]

## Sheet: Input weighted BIC values
Values in this table are 1 - weighted BIC values.
This is to facilitate filtering within the IPA interface, which is built to handle "less than" p/q-value comparisons to identify differential gene sets.
For example, to identify genes with a weighted BIC > 0.75, filter for those values < 0.25.
Gene	Rhythmicity_in_young_and_old	Rhythmicity_in_young_but_not_in_old	Rhythmicity_in_old_but_not_in_young	Rhythmicity_in_neither_young_nor_old
ENSG00000000003	0.996563	0.988873	0.773585	0.240979
ENSG00000000419	0.99054	0.31405	0.996033	0.699377
ENSG00000000457	0.99809	0.982514	0.906757	0.112639
ENSG00000000460	0.999116	0.904574	0.991723	0.104587
ENSG00000000971	0.995485	0.940934	0.938484	0.125097
ENSG00000001036	0.99313	0.992317	0.545704	0.468849
ENSG00000001084	0.942415	0.914161	0.700662	0.442762
ENSG00000001167	0.793303	0.70792	0.833896	0.664881
ENSG00000001460	0.994574	0.423807	0.996116	0.585504
ENSG00000001461	0.260533	0.73947	0.999999	0.999998
ENSG00000001497	0.909496	0.995351	0.154511	0.940641
ENSG00000001617	0.998201	0.941506	0.973199	0.0870935
ENSG00000001629	0.569382	0.879588	0.69543	0.855599
ENSG00000001630	0.417967	0.955029	0.675629	0.951375
ENSG00000001631	0.999894	0.98844	0.990992	0.0206747
ENSG00000002016	0.993475	0.922875	0.934414	0.149236
ENSG00000002330	0.9911	0.0280141	0.999827	0.981059
ENSG00000002549	0.446893	0.591126	0.984833	0.977148
ENSG00000002586	0.333402	0.774666	0.935744	0.956188
ENSG00000002746	0.998886	0.986709	0.925288	0.0891161
ENSG00000002822	0.999092	0.935371	0.98728	0.0782577
ENSG00000002834	0.99898	0.897252	0.991232	0.112536
ENSG00000002919	0.965745	0.035562	0.999965	0.998728
ENSG00000003056	0.903314	0.165748	0.994636	0.936302
ENSG00000003249	0.99902	0.941016	0.984977	0.0749867
ENSG00000003393	0.999695	0.983013	0.982847	0.0344449
ENSG00000003400	0.99056	0.958514	0.839555	0.21137
ENSG00000003402	0.916022	0.0920102	0.99953	0.992438
ENSG00000003436	0.000202044	0.999995	0.999803	1
ENSG00000003509	0.999691	0.98082	0.984571	0.0349184
ENSG00000003756	0.16136	0.855267	0.988382	0.994991
ENSG00000003987	0.999671	0.974623	0.987629	0.0380766
ENSG00000003989	0.98008	0.999969	0.0217126	0.998238
ENSG00000004059	0.996264	0.920166	0.961814	0.121756
ENSG00000004139	0.968795	0.996728	0.141598	0.892879
ENSG00000004142	0.989508	0.997064	0.237105	0.776323
ENSG00000004399	0.997269	0.97653	0.903387	0.122813
ENSG00000004455	0.741153	0.327603	0.987015	0.944229
ENSG00000004478	0.989449	0.985994	0.600337	0.42422
ENSG00000004487	0.965173	0.184679	0.994862	0.855285
ENSG00000004534	1.49232e-05	0.999986	0.999999	1
ENSG00000004660	1.17252e-09	1	1	1
ENSG00000004700	0.940275	0.0599907	0.99999	0.999744
ENSG00000004766	0.985855	0.0320833	0.999759	0.982302
ENSG00000004776	0.998879	0.895936	0.990551	0.114633
ENSG00000004777	0.549764	0.450251	0.999997	0.999989
ENSG00000004779	0.970538	0.997803	0.109485	0.922173
ENSG00000004838	0.995846	0.976927	0.859779	0.167448
ENSG00000004864	0.937146	0.91592	0.685477	0.461456
ENSG00000004866	0.99806	0.918055	0.979623	0.104263
ENSG00000004897	0.885612	0.769996	0.821648	0.522745
ENSG00000004961	0.994542	0.982898	0.774307	0.248253
ENSG00000004975	0.936227	0.0638748	0.999996	0.999902
ENSG00000005007	0.946107	0.840714	0.831766	0.381412
ENSG00000005020	0.979186	0.998448	0.0984578	0.923909
ENSG00000005022	0.994115	0.962261	0.880709	0.162916
ENSG00000005059	0.997195	0.936499	0.962667	0.103639
ENSG00000005073	0.99224	0.981505	0.727416	0.298838
ENSG00000005075	0.340199	0.954779	0.741288	0.963734
ENSG00000005100	0.972475	0.99116	0.299313	0.737052
ENSG00000005156	0.991838	0.968067	0.819696	0.220398
ENSG00000005175	0.589283	0.410722	0.999999	0.999996
ENSG00000005187	0.999808	0.985886	0.986843	0.0274627
ENSG00000005189	0.185377	0.815382	0.999575	0.999666
ENSG00000005194	0.999259	0.973673	0.974009	0.0530588
ENSG00000005206	0.969503	0.992525	0.254013	0.783958
ENSG00000005238	0.855772	0.186561	0.995491	0.962176
ENSG00000005243	0.998698	0.991735	0.865727	0.14384
ENSG00000005249	0.871146	0.954383	0.447308	0.727164
ENSG00000005302	0.629525	0.371063	0.999885	0.999527
ENSG00000005339	0.985779	0.998781	0.0982117	0.917229
ENSG00000005379	0.999326	0.990505	0.934763	0.0754059
ENSG00000005436	0.970595	0.0390523	0.999765	0.990587
ENSG00000005448	0.999832	0.988773	0.985467	0.0259278
ENSG00000005469	4.98507e-05	0.999954	0.999997	1
ENSG00000005471	0.999809	0.991088	0.979196	0.0299062
ENSG00000005483	0.995579	0.988538	0.733972	0.281911
ENSG00000005486	0.919555	0.45705	0.961198	0.662197
ENSG00000005700	0.969788	0.150219	0.996502	0.883491
ENSG00000005801	0.997538	0.918386	0.974506	0.10957
ENSG00000005810	0.0774497	0.925374	0.997773	0.999404
ENSG00000005812	0.986488	0.944823	0.835762	0.232928
ENSG00000005882	0.999863	0.990412	0.986058	0.0236672
ENSG00000005884	0.99753	0.748382	0.992794	0.261295
ENSG00000005889	0.983102	0.993891	0.301153	0.721854
ENSG00000005893	0.745338	0.284477	0.994908	0.975277
ENSG00000006007	0.99816	0.934879	0.975482	0.0914787
ENSG00000006015	0.112755	0.972579	0.920805	0.993861
ENSG00000006016	0.999024	0.990518	0.908328	0.102129
ENSG00000006025	0.999425	0.966876	0.983793	0.0499063
ENSG00000006042	0.998913	0.98019	0.950421	0.0704758
ENSG00000006062	0.955232	0.899804	0.774094	0.37087
ENSG00000006118	0.784202	0.21702	0.999851	0.998927
ENSG00000006125	0.607803	0.408179	0.995987	0.988031
ENSG00000006194	0.98774	0.368955	0.993658	0.649648
ENSG00000006282	0.999766	0.987926	0.981282	0.0310269
ENSG00000006283	0.998594	0.937782	0.980014	0.0836099
ENSG00000006327	0.967623	0.975504	0.504967	0.551907
ENSG00000006451	0.983995	0.983977	0.544673	0.487355
ENSG00000006453	0.404236	0.602723	0.997315	0.995726
ENSG00000006459	0.98621	0.998148	0.139631	0.876011
ENSG00000006468	0.653774	0.628883	0.896636	0.820708
ENSG00000006530	0.490277	0.580271	0.972535	0.956917
ENSG00000006534	0.99787	0.991351	0.80652	0.204259
ENSG00000006576	0.966066	0.705112	0.941839	0.386983
ENSG00000006607	0.977659	0.990745	0.343052	0.688545
ENSG00000006625	0.766014	0.871984	0.649395	0.712608
ENSG00000006634	0.989181	0.0634306	0.99942	0.947969
ENSG00000006638	0.971683	0.995807	0.174351	0.858159
ENSG00000006652	0.963362	0.972071	0.510487	0.554079
ENSG00000006695	0.999728	0.98427	0.983397	0.0326048
ENSG00000006704	0.999719	0.987896	0.977708	0.0346779
ENSG00000006712	0.984625	0.0167889	0.99998	0.998606
ENSG00000006715	0.819601	0.182398	0.99978	0.998222
ENSG00000006740	0.999789	0.97905	0.990263	0.0308976
ENSG00000006744	0.989915	0.97276	0.759411	0.277914
ENSG00000006747	0.952534	0.98329	0.348791	0.715386
ENSG00000006756	0.989237	0.984719	0.61901	0.407035
ENSG00000006831	0.946427	0.955052	0.561459	0.537061
ENSG00000007047	0.985846	0.710579	0.971166	0.332409
ENSG00000007080	0.906826	0.441844	0.960634	0.690696
ENSG00000007168	0.950236	0.502326	0.966428	0.58101
ENSG00000007202	0.99072	0.994256	0.403933	0.611091
ENSG00000007255	0.999463	0.980037	0.974771	0.045729
ENSG00000007341	0.999536	0.979313	0.978851	0.0422996
ENSG00000007376	0.992879	0.868011	0.959885	0.179225
ENSG00000007384	0.926786	0.76434	0.866646	0.442228
ENSG00000007392	0.823239	0.339844	0.97515	0.861767
ENSG00000007520	0.960359	0.999688	0.0494462	0.990507
ENSG00000007541	0.994117	0.929562	0.934409	0.141911
ENSG00000007545	0.999506	0.946313	0.99139	0.0627907
ENSG00000007866	0.946712	0.89863	0.751466	0.403193
ENSG00000007923	0.997686	0.969734	0.93473	0.0978496
ENSG00000007944	0.993023	0.945798	0.902235	0.158944
ENSG00000007968	1.38951e-08	1	1	1
ENSG00000008018	0.944227	0.993697	0.179014	0.883062
ENSG00000008083	0.999024	0.973782	0.966129	0.061065
ENSG00000008086	0.861993	0.996522	0.173394	0.968091
ENSG00000008118	0.990655	0.942223	0.882572	0.184551
ENSG00000008128	0.989266	0.0326054	0.999768	0.978361
ENSG00000008130	0.8872	0.997154	0.146743	0.968904
ENSG00000008256	0.991781	0.948343	0.88261	0.177266
ENSG00000008277	0.998366	0.987699	0.886856	0.127079
ENSG00000008282	0.998485	0.837414	0.992304	0.171797
ENSG00000008283	0.969185	0.533555	0.973301	0.523959
ENSG00000008294	0.0251038	0.999382	0.975594	0.999921
ENSG00000008300	0.795209	0.989637	0.271886	0.943268
ENSG00000008311	0.109143	0.984994	0.910111	0.995752
ENSG00000008324	0.994425	0.930638	0.936479	0.138457
ENSG00000008382	0.985371	0.519118	0.986578	0.508933
ENSG00000008394	0.186163	0.854006	0.971953	0.987878
ENSG00000008405	5.12996e-05	0.99999	0.999959	1
ENSG00000008441	0.999292	0.946205	0.987877	0.0666267
ENSG00000008513	0.35736	0.642669	0.99999	0.999981
ENSG00000008517	0.852112	0.990298	0.232638	0.924951
ENSG00000008710	2.16803e-08	1	1	1
ENSG00000008838	0.995286	0.800618	0.982689	0.221407
ENSG00000008853	0.766801	0.233343	0.999983	0.999873
ENSG00000008869	0.975762	0.0817728	0.998718	0.943747
ENSG00000008952	0.959943	0.0409934	0.999972	0.999091
ENSG00000008988	0.983009	0.0259153	0.999862	0.991214
ENSG00000009307	0.959879	0.394522	0.981726	0.663873
ENSG00000009335	0.958717	0.995094	0.167687	0.878502
ENSG00000009413	0.998196	0.992433	0.809882	0.199489
ENSG00000009724	0.97268	0.995089	0.200028	0.832204
ENSG00000009780	0.956354	0.0439042	0.999992	0.99975
ENSG00000009830	0.989276	0.993436	0.405941	0.611348
ENSG00000009844	0.987572	0.265409	0.996045	0.750973
ENSG00000009954	0.940518	0.761474	0.885151	0.412857
ENSG00000010017	0.674339	0.393721	0.983856	0.948084
ENSG00000010030	0.915146	1	1	1
ENSG00000010072	0.99973	0.978939	0.987665	0.0336658
ENSG00000010165	0.982976	0.651891	0.973928	0.391206
ENSG00000010219	0.998301	0.985861	0.897024	0.118813
ENSG00000010244	0.987601	0.566548	0.985984	0.459867
ENSG00000010256	0.84603	0.959034	0.417363	0.777573
ENSG00000010270	0.990692	0.297927	0.996362	0.715019
ENSG00000010278	0.998446	0.987232	0.895414	0.118907
ENSG00000010292	0.0114013	0.988599	1	1
ENSG00000010295	0.999763	0.981433	0.987699	0.0311054
ENSG00000010310	0.979233	0.838558	0.918598	0.263611
ENSG00000010318	0.999684	0.986061	0.978346	0.0359087
ENSG00000010322	0.968007	0.931292	0.750062	0.350639
ENSG00000010361	0.999584	0.988399	0.966099	0.0459174
ENSG00000010404	0.991355	0.866644	0.952561	0.189439
ENSG00000010438	0.696177	0.981097	0.385058	0.937668
ENSG00000010539	0.999481	0.988891	0.956265	0.0553623
ENSG00000010610	0.998985	0.975418	0.962522	0.0630751
ENSG00000010626	0.989277	0.986015	0.596398	0.428311
ENSG00000010704	0.997513	0.950282	0.957364	0.0948408
ENSG00000010803	0.9789	0.806862	0.933222	0.281015
ENSG00000010810	0.977787	0.939855	0.781051	0.301308
ENSG00000010818	0.988534	0.011558	0.999999	0.999909
ENSG00000011007	0.714731	0.991758	0.326061	0.967449
ENSG00000011009	0.999312	0.967599	0.9803	0.0527889
ENSG00000011021	0.0979165	0.988626	0.916529	0.996929
ENSG00000011028	0.881084	0.118917	1	0.999999
ENSG00000011052	0.997551	0.992024	0.769605	0.24082
ENSG00000011105	0.878187	0.951989	0.46262	0.707203
ENSG00000011114	0.90235	0.0977559	0.999994	0.9999
ENSG00000011132	0.998914	0.977649	0.956135	0.0673018
ENSG00000011143	0.992527	0.891255	0.948486	0.167732
ENSG00000011198	0.00802495	0.991996	0.99998	0.999998
ENSG00000011243	0.981364	0.0324134	0.999769	0.986453
ENSG00000011258	0.999588	0.990938	0.957003	0.0524707
ENSG00000011260	0.990299	0.998802	0.122007	0.888891
ENSG00000011275	0.134415	0.947037	0.929291	0.989258
ENSG00000011295	0.0604508	0.961523	0.9805	0.997527
ENSG00000011304	0.000218725	0.999781	1	1
ENSG00000011332	0.863574	0.988743	0.237331	0.910352
ENSG00000011347	0.999914	0.990504	0.991134	0.0184479
ENSG00000011376	0.99936	0.987483	0.952642	0.0605151
ENSG00000011405	0.998691	0.872545	0.991205	0.137559
ENSG00000011422	0.996399	0.99386	0.635619	0.374123
ENSG00000011426	0.990296	0.462642	0.992454	0.554607
ENSG00000011451	0.172955	0.999716	0.827529	0.9998
ENSG00000011454	0.990958	0.945804	0.878616	0.184621
ENSG00000011465	0.968873	0.97319	0.535488	0.522449
ENSG00000011478	0.99951	0.98397	0.971276	0.0452434
ENSG00000011485	0.940884	0.98231	0.331616	0.74519
ENSG00000011523	0.996079	0.696183	0.991409	0.316329
ENSG00000011566	0.995219	0.816909	0.980617	0.207254
ENSG00000011638	0.894238	0.780185	0.81987	0.505706
ENSG00000012048	0.0597294	0.940293	0.999984	0.999994
ENSG00000012061	0.974455	0.850643	0.896671	0.278231
ENSG00000012171	0.921542	0.992179	0.192384	0.893894
ENSG00000012174	0.202409	0.82286	0.983335	0.991396
ENSG00000012211	0.997129	0.778562	0.99029	0.234019
ENSG00000012232	0.486552	0.698967	0.909684	0.904797
ENSG00000012660	0.223496	0.999982	0.776545	0.999977
ENSG00000012817	0.993773	0.497836	0.994147	0.514243
ENSG00000012822	0.937247	0.989768	0.232088	0.840897
ENSG00000012963	0.57588	0.426712	0.999367	0.998041
ENSG00000012983	0.936793	0.0969211	0.998339	0.967947
ENSG00000013016	0.857821	0.509034	0.937364	0.695781
ENSG00000013275	0.996343	0.989152	0.757571	0.256935
ENSG00000013288	0.920597	0.795189	0.836509	0.447705
ENSG00000013297	0.927519	0.999964	0.995877	0.999484
ENSG00000013306	0.989592	0.999998	0.0105834	0.999827
ENSG00000013364	0.993694	0.34046	0.996857	0.66899
ENSG00000013374	0.978144	0.674568	0.964499	0.382789
ENSG00000013375	0.999793	0.988131	0.983113	0.0289635
ENSG00000013392	0.998014	0.80178	0.992122	0.208084
ENSG00000013441	0.998658	0.992048	0.85733	0.151964
ENSG00000013503	0.428881	0.609118	0.983779	0.978223
ENSG00000013523	0.98426	0.628113	0.977929	0.409698
ENSG00000013561	0.9998	0.987886	0.983987	0.0283274
ENSG00000013563	0.523556	0.91032	0.674023	0.892101
ENSG00000013573	0.0439616	0.984136	0.973385	0.998518
ENSG00000013583	0.999321	0.990426	0.934818	0.0754345
ENSG00000013588	0.693479	0.404758	0.976861	0.924902
ENSG00000013619	0.473618	0.991429	0.550189	0.984765
ENSG00000013810	0.898173	0.217503	0.990124	0.8942
ENSG00000014123	0.967469	0.0325309	1	1
ENSG00000014138	0.283745	0.919759	0.8349	0.961597
ENSG00000014164	0.99921	0.964627	0.979467	0.0566956
ENSG00000014216	0.988866	0.127697	0.998593	0.884844
ENSG00000014257	0.995531	0.771641	0.986005	0.246823
ENSG00000014641	0.994487	0.97312	0.845994	0.186398
ENSG00000014824	0.994451	0.538472	0.993814	0.473263
ENSG00000014914	0.830664	0.777516	0.788238	0.603581
ENSG00000014919	0.995703	0.619548	0.993247	0.391502
ENSG00000015153	0.995365	0.939651	0.938019	0.126964
ENSG00000015171	0.892068	0.107933	1	0.999999
ENSG00000015475	0.9753	0.951924	0.719248	0.353529
ENSG00000015479	0.995653	0.976985	0.854108	0.173254
ENSG00000015532	0.763303	0.237003	0.999962	0.999732
ENSG00000015568	0.99926	0.958239	0.983655	0.0588462
ENSG00000015676	0.998755	0.98485	0.927126	0.0892692
ENSG00000016864	0.997576	0.9769	0.911661	0.113863
ENSG00000017260	0.999385	0.972945	0.978784	0.048886
ENSG00000017797	0.0216831	0.978317	1	1
ENSG00000018189	0.99531	0.951687	0.922191	0.130812
ENSG00000018280	0.998543	0.948486	0.974892	0.0780791
ENSG00000018408	0.885149	0.125383	0.999183	0.990284
ENSG00000018510	0.906102	0.0954732	0.999902	0.998523
ENSG00000018610	0.98174	0.994105	0.281298	0.742857
ENSG00000018699	0.997067	0.993768	0.68353	0.325635
ENSG00000018869	0.999796	0.988643	0.982654	0.0289065
ENSG00000019144	0.996566	0.981649	0.852689	0.169096
ENSG00000019485	0.995062	0.624222	0.992204	0.388511
ENSG00000019549	0.991797	0.627293	0.987564	0.393346
ENSG00000019991	0.988542	0.976169	0.709189	0.3261
ENSG00000019995	0.999458	0.989259	0.952861	0.0584224
ENSG00000020129	0.207989	0.955602	0.854139	0.98227
ENSG00000020181	0.944564	0.540741	0.957639	0.557056
ENSG00000020256	0.998154	0.973256	0.939785	0.088805
ENSG00000020426	0.711566	0.999708	0.290233	0.998493
ENSG00000020577	0.99881	0.975133	0.956996	0.0690615
ENSG00000020922	0.911063	0.35184	0.97555	0.761546
ENSG00000021355	0.274081	0.902263	0.86084	0.962816
ENSG00000021574	0.999832	0.990991	0.981913	0.0272639
ENSG00000021645	0.973009	0.0290978	0.999954	0.99794
ENSG00000021762	0.996435	0.994556	0.608217	0.400792
ENSG00000021776	0.956349	0.880765	0.807243	0.355642
ENSG00000021826	0.062835	0.99145	0.947286	0.998429
ENSG00000022267	0.944429	0.862086	0.805504	0.387981
ENSG00000022277	0.653274	0.846928	0.70726	0.792539
ENSG00000022567	0.998408	0.933181	0.979083	0.0893281
ENSG00000022840	0.885153	0.121073	0.999522	0.994252
ENSG00000022976	0.999681	0.975829	0.987394	0.0370955
ENSG00000023041	0.99923	0.944725	0.987237	0.0688083
ENSG00000023171	0.998955	0.894249	0.9913	0.115497
ENSG00000023191	0.998787	0.899438	0.989432	0.112344
ENSG00000023228	0.732926	0.799068	0.75222	0.715785
ENSG00000023287	0.97753	0.996349	0.178302	0.847819
ENSG00000023318	0.509051	0.965897	0.579346	0.945706
ENSG00000023330	0.998155	0.98442	0.899112	0.118313
ENSG00000023445	0.756753	0.641479	0.876461	0.725307
ENSG00000023516	0.965313	0.0346995	1	0.999988
ENSG00000023572	0.83686	0.171786	0.999097	0.992257
ENSG00000023608	0.991028	0.975113	0.761934	0.271924
ENSG00000023697	0.994349	0.632879	0.990881	0.38189
ENSG00000023734	0.964652	0.994676	0.188068	0.852605
ENSG00000023839	0.999768	0.985155	0.9849	0.0301771
ENSG00000023892	0.997133	0.894444	0.977572	0.130851
ENSG00000023902	0.9984	0.950098	0.971769	0.0797328
ENSG00000023909	0.998825	0.982418	0.940228	0.0785281
ENSG00000024048	0.998126	0.986598	0.882317	0.132959
ENSG00000024422	0.926241	0.224325	0.989911	0.859524
ENSG00000024526	0.942674	0.457807	0.969136	0.630383
ENSG00000024862	0.991647	0.960484	0.84686	0.201009
ENSG00000025156	0.342481	0.657519	1	1
ENSG00000025293	0.98825	0.01188	0.999999	0.999872
ENSG00000025423	0.987236	0.89864	0.912191	0.201932
ENSG00000025434	0.973944	0.824235	0.910937	0.290884
ENSG00000025708	0.999579	0.986975	0.969432	0.0440148
ENSG00000025770	0.997784	0.976588	0.919473	0.106155
ENSG00000025772	0.992683	0.995646	0.386812	0.624859
ENSG00000025796	0.953406	0.773987	0.896911	0.375696
ENSG00000025800	0.998774	0.988038	0.909767	0.103421
ENSG00000026025	0.982734	0.0172657	1	1
ENSG00000026036	0.995485	0.643663	0.992198	0.368655
ENSG00000026103	0.568928	0.431072	1	1
ENSG00000026297	0.999695	0.987737	0.976213	0.0363554
ENSG00000026508	0.225206	0.793797	0.988553	0.992444
ENSG00000026559	0.98278	0.876236	0.908331	0.232652
ENSG00000026652	0.998474	0.982677	0.923032	0.0958168
ENSG00000026950	0.986775	0.945723	0.836045	0.231457
ENSG00000027001	0.336251	0.969772	0.720727	0.97325
ENSG00000027075	0.999765	0.984155	0.985714	0.0303661
ENSG00000027697	0.896925	0.197014	0.992144	0.913917
ENSG00000027847	0.993674	0.989506	0.642336	0.374484
ENSG00000028116	0.287979	0.911035	0.841757	0.959228
ENSG00000028203	0.96171	0.914947	0.764842	0.358501
ENSG00000028277	0.889422	0.820949	0.777554	0.512075
ENSG00000028310	0.999232	0.97296	0.97382	0.0539877
ENSG00000028528	0.953775	0.943091	0.645564	0.45757
ENSG00000028839	0.999511	0.965859	0.986514	0.0481167
ENSG00000029153	0.979848	0.721522	0.958968	0.339662
ENSG00000029363	0.84305	0.948841	0.455941	0.752168
ENSG00000029364	0.999492	0.966298	0.985841	0.0483694
ENSG00000029534	0.425156	0.929353	0.712229	0.933261
ENSG00000029639	0.930829	0.849994	0.794715	0.424462
ENSG00000029725	0.962362	0.304143	0.988597	0.744899
ENSG00000029993	0.307451	0.693342	0.999664	0.999543
ENSG00000030066	0.94142	0.743124	0.895986	0.41947
ENSG00000030110	0.991456	0.687744	0.983222	0.337578
ENSG00000030419	0.832512	0.181571	0.998449	0.987469
ENSG00000030582	0.501683	0.498317	1	1
ENSG00000031003	0.940759	0.960469	0.508547	0.590225
ENSG00000031081	0.809335	0.295023	0.984384	0.911258
ENSG00000031691	0.0116467	0.988734	0.999645	0.999974
ENSG00000031698	0.00295357	0.997459	0.999596	0.999991
ENSG00000031823	0.980053	0.986125	0.461059	0.572762
ENSG00000032219	0.9793	0.775863	0.944266	0.300571
ENSG00000032389	0.999727	0.985787	0.981592	0.0328945
ENSG00000032444	0.120208	0.898179	0.986078	0.995535
ENSG00000032742	0.560616	0.526216	0.970601	0.942567
ENSG00000033011	0.999761	0.981493	0.98757	0.0311759
ENSG00000033030	0.998322	0.97343	0.944495	0.0837529
ENSG00000033050	0.987794	0.998363	0.135869	0.877973
ENSG00000033100	0.99335	0.972831	0.822113	0.211706
ENSG00000033170	0.950317	0.825503	0.856647	0.367534
ENSG00000033178	0.997218	0.875916	0.981737	0.145129
ENSG00000033327	0.00609532	0.994191	0.999726	0.999988
ENSG00000033627	0.971243	0.488042	0.979164	0.56155
ENSG00000033800	0.990084	0.925488	0.902677	0.181751
ENSG00000033867	0.943852	0.33385	0.982667	0.739631
ENSG00000034053	0.966726	0.0332744	1	1
ENSG00000034152	0.0560695	0.995722	0.949031	0.999177
ENSG00000034510	0.991079	0.227443	0.997569	0.783909
ENSG00000034533	0.961406	0.0524289	0.999565	0.9866
ENSG00000034677	0.977246	0.829016	0.91854	0.275198
ENSG00000034693	0.783598	0.901668	0.59093	0.723804
ENSG00000034713	0.999575	0.953891	0.991291	0.0552436
ENSG00000035115	0.999527	0.973218	0.983374	0.0438806
ENSG00000035141	0.439711	0.99132	0.582738	0.986231
ENSG00000035403	0.822879	0.749852	0.810644	0.616624
ENSG00000035499	0.916375	0.0985913	0.999102	0.985931
ENSG00000035664	0.982081	0.190822	0.996617	0.83048
ENSG00000035681	0.0746711	0.958541	0.970614	0.996174
ENSG00000035687	0.40499	0.595832	0.999718	0.99946
ENSG00000035862	0.662821	0.34842	0.997642	0.991116
ENSG00000035928	0.00425724	0.995743	1	1
ENSG00000036054	0.756607	0.419371	0.962692	0.861329
ENSG00000036257	0.99395	0.638125	0.990092	0.377833
ENSG00000036530	0.998219	0.963063	0.95779	0.0809287
ENSG00000036549	0.999622	0.970563	0.987801	0.0420136
ENSG00000037042	0.977256	0.743081	0.949628	0.330035
ENSG00000037241	0.997522	0.786777	0.991138	0.224563
ENSG00000037474	0.996776	0.977076	0.885565	0.140583
ENSG00000037637	0.974057	0.99397	0.235854	0.796119
ENSG00000037749	0.987728	0.930317	0.877226	0.204729
ENSG00000037757	0.024709	0.978939	0.996659	0.999693
ENSG00000037897	0.851056	0.994789	0.196017	0.958138
ENSG00000037965	0.999799	0.986978	0.985038	0.0281852
ENSG00000038002	0.998254	0.916995	0.981832	0.10292
ENSG00000038210	0.878876	0.80314	0.788444	0.52954
ENSG00000038219	0.997669	0.987664	0.847341	0.167326
ENSG00000038274	0.929765	0.100291	0.998356	0.971588
ENSG00000038295	0.997932	0.992814	0.779116	0.230138
ENSG00000038358	0.953345	0.0816661	0.99867	0.966319
ENSG00000038382	0.9815	0.972833	0.64487	0.400796
ENSG00000038427	0.999317	0.986017	0.954847	0.0598187
ENSG00000038532	0.859981	0.160838	0.998003	0.981177
ENSG00000038945	0.990406	0.864151	0.94943	0.196013
ENSG00000039123	0.818251	0.20732	0.996761	0.977668
ENSG00000039139	0.999845	0.986393	0.988938	0.0248232
ENSG00000039319	0.00626114	0.993743	0.999996	1
ENSG00000039523	0.998984	0.904727	0.990541	0.105749
ENSG00000039560	0.868384	0.872384	0.683557	0.575675
ENSG00000039650	0.99543	0.825412	0.980343	0.198816
ENSG00000040199	0.974489	0.254557	0.993359	0.777594
ENSG00000040275	0.999556	0.981703	0.977067	0.0416737
ENSG00000040341	0.827331	0.174936	0.999759	0.997974
ENSG00000040487	0.102741	0.929065	0.973545	0.99465
ENSG00000040531	0.902946	0.965018	0.415713	0.716322
ENSG00000040633	0.928507	0.103856	0.998194	0.969443
ENSG00000040933	0.669829	0.792873	0.764353	0.772946
ENSG00000041353	0.897214	0.982372	0.288275	0.832139
ENSG00000041357	0.986854	0.911087	0.897423	0.204636
ENSG00000041802	0.995055	0.99346	0.579454	0.43203
ENSG00000041880	0.999618	0.981569	0.980295	0.0385191
ENSG00000041982	0.612491	0.859148	0.704981	0.82338
ENSG00000041988	0.968067	0.537219	0.972123	0.522591
ENSG00000042062	0.998946	1	1	1
ENSG00000042088	0.99531	0.745832	0.987211	0.271647
ENSG00000042286	0.988322	0.981761	0.644507	0.38541
ENSG00000042317	0.999489	0.990662	0.948777	0.0610723
ENSG00000042429	0.999315	0.957125	0.985213	0.0583466
ENSG00000042445	0.998963	0.922195	0.988085	0.0907569
ENSG00000042493	0.999067	0.988023	0.929719	0.083191
ENSG00000042753	0.973118	0.986728	0.389004	0.651151
ENSG00000042781	0.997067	0.927726	0.966081	0.109127
ENSG00000042832	0.990619	0.332504	0.995705	0.681172
ENSG00000043093	0.82326	0.178531	0.999814	0.998395
ENSG00000043143	0.0360073	0.963993	1	1
ENSG00000043514	0.943153	0.990502	0.228254	0.838091
ENSG00000044090	0.997952	0.992697	0.783627	0.225723
ENSG00000044115	0.00233397	0.999195	0.998481	0.99999
ENSG00000044446	0.991592	0.227554	0.99769	0.783164
ENSG00000044459	0.0870787	0.912998	0.999948	0.999975
ENSG00000044574	0.000426145	0.999729	0.999845	0.999999
ENSG00000046647	0.998823	0.989796	0.898828	0.112553
ENSG00000046651	0.990376	0.62327	0.985909	0.400445
ENSG00000046774	0.99231	0.922675	0.92502	0.159995
ENSG00000047056	0.995154	0.903861	0.959935	0.14105
ENSG00000047188	0.0128356	0.987192	0.999975	0.999997
ENSG00000047230	0.999486	0.966943	0.985405	0.0481661
ENSG00000047249	0.96512	0.85757	0.861021	0.31629
ENSG00000047315	0.51709	0.483061	0.999961	0.999887
ENSG00000047346	0.998195	0.961152	0.959229	0.0814246
ENSG00000047410	0.948945	0.982151	0.352322	0.716582
ENSG00000047578	0.939682	0.959453	0.515461	0.585403
ENSG00000047579	0.999455	0.961219	0.986844	0.0524817
ENSG00000047621	0.996925	0.854507	0.983189	0.165379
ENSG00000047634	0.978932	0.597409	0.97506	0.448599
ENSG00000047644	0.139857	0.937157	0.934184	0.988802
ENSG00000047849	0.00769607	0.992318	0.999987	0.999999
ENSG00000047932	0.977951	0.0220487	1	1
ENSG00000048028	0.998138	0.808239	0.992281	0.201342
ENSG00000048052	0.819487	0.988736	0.26267	0.929108
ENSG00000048140	0.486214	0.536769	0.991728	0.985289
ENSG00000048162	0.985714	0.989083	0.471605	0.553598
ENSG00000048342	0.999662	0.9639	0.991062	0.0453759
ENSG00000048392	0.755891	0.732045	0.815846	0.696218
ENSG00000048405	0.996016	0.84293	0.980434	0.180619
ENSG00000048471	0.948486	0.688804	0.92583	0.43688
ENSG00000048544	0.889517	0.128022	0.998649	0.983811
ENSG00000048649	0.755086	0.81396	0.730378	0.700577
ENSG00000048707	0.820356	0.452452	0.950038	0.777154
ENSG00000048740	0.999822	0.988018	0.985601	0.0265584
ENSG00000048828	0.995109	0.965233	0.889775	0.149883
ENSG00000048991	0.988972	0.944968	0.859509	0.206551
ENSG00000049089	0.998596	0.998798	0.99908	0.972448
ENSG00000049130	3.89799e-07	1	1	1
ENSG00000049167	0.998993	0.900071	0.991074	0.109862
ENSG00000049192	0.78376	0.238413	0.996829	0.980998
ENSG00000049239	0.998304	0.989847	0.86059	0.15126
ENSG00000049245	0.395133	0.667681	0.969488	0.967698
ENSG00000049246	0	1	1	1
ENSG00000049323	0.996386	0.980117	0.857034	0.166464
ENSG00000049449	0.57635	0.911919	0.639496	0.872235
ENSG00000049540	0.930854	1	1	1
ENSG00000049541	0.477353	0.996116	0.534125	0.992406
ENSG00000049618	0.99866	0.970266	0.959776	0.0712981
ENSG00000049656	0.991858	0.97286	0.792233	0.243049
ENSG00000049759	0.310186	0.821557	0.913579	0.954678
ENSG00000049769	0.999618	0.971929	0.987058	0.041395
ENSG00000049860	0.00698036	0.999082	0.993972	0.999965
ENSG00000049883	0.937628	0.136369	0.996087	0.929916
ENSG00000050130	0.987578	0.903314	0.909196	0.199911
ENSG00000050165	0.862273	0.13773	1	0.999998
ENSG00000050327	0.999518	0.948503	0.991231	0.060747
ENSG00000050344	0.0312732	0.970304	0.998613	0.999809
ENSG00000050393	0.990791	0.986469	0.622871	0.399868
ENSG00000050405	0.000273945	0.999726	1	1
ENSG00000050426	0.970178	0.999319	0.0561972	0.974305
ENSG00000050438	0.0406364	0.989357	0.971125	0.998881
ENSG00000050730	0.965541	0.705165	0.94112	0.388174
ENSG00000050748	0.997924	0.988853	0.848176	0.165048
ENSG00000050820	0.95588	0.990245	0.256705	0.797169
ENSG00000051009	0.998962	0.99139	0.893852	0.115797
ENSG00000051108	0.977885	0.996843	0.161456	0.863815
ENSG00000051128	0.876871	0.138726	0.998652	0.985751
ENSG00000051180	0.950061	0.836378	0.844332	0.369229
ENSG00000051341	0.99679	0.801313	0.987767	0.21413
ENSG00000051382	0.875124	0.405967	0.963155	0.755754
ENSG00000051523	0.986828	0.0179698	0.999941	0.995262
ENSG00000051596	0.999494	0.988611	0.958302	0.0535936
ENSG00000051620	0.988884	0.99998	0.0129663	0.99817
ENSG00000051825	0.999427	0.986434	0.960589	0.0535504
ENSG00000052126	0.986437	0.985845	0.549304	0.478414
ENSG00000052723	0.976302	0.0249784	0.999975	0.998745
ENSG00000052749	0.21437	0.999565	0.786431	0.999634
ENSG00000052795	0.978246	0.0217562	1	0.999998
ENSG00000052802	0.562915	0.999811	0.437885	0.999389
ENSG00000052841	0.997612	0.973726	0.922973	0.105689
ENSG00000052850	0.99985	0.983451	0.991148	0.025552
ENSG00000053254	0.997124	0.764425	0.991001	0.247451
ENSG00000053371	0.991062	0.999975	0.0117312	0.997232
ENSG00000053372	0.970803	0.998726	0.0784184	0.952053
ENSG00000053501	0.999784	0.979086	0.99001	0.0311206
ENSG00000053702	0.996331	0.974406	0.885082	0.144182
ENSG00000053747	0.787028	0.997784	0.229033	0.986155
ENSG00000053770	0.998727	0.904633	0.988315	0.108325
ENSG00000053900	0.993867	0.332353	0.997039	0.676741
ENSG00000054116	0.997544	0.987895	0.837692	0.176869
ENSG00000054118	0.790287	0.305907	0.984449	0.919357
ENSG00000054148	0.984551	0.673065	0.973726	0.368657
ENSG00000054267	0.99486	0.800434	0.981294	0.223411
ENSG00000054277	0.977999	0.998908	0.0755619	0.947531
ENSG00000054282	0.99284	0.282607	0.997309	0.727244
ENSG00000054392	0.991022	0.131418	0.998768	0.878792
ENSG00000054523	0.768663	0.41614	0.961333	0.853864
ENSG00000054598	0.015311	0.99972	0.984995	0.999973
ENSG00000054611	0.921647	0.857243	0.766698	0.454413
ENSG00000054654	0.147178	0.853854	0.999357	0.999611
ENSG00000054793	0.994136	0.996305	0.394247	0.615312
ENSG00000054965	0.497333	0.99993	0.502925	0.999812
ENSG00000054967	0.999486	0.982421	0.97253	0.0455628
ENSG00000054983	0.988525	0.152535	0.998199	0.860741
ENSG00000055044	0.873619	0.999143	0.136299	0.99094
ENSG00000055070	0.914858	0.0870027	0.999896	0.998243
ENSG00000055130	0.236595	0.770588	0.995908	0.996909
ENSG00000055147	0.999205	0.960729	0.981373	0.058693
ENSG00000055163	0.998526	0.966793	0.960624	0.0740564
ENSG00000055208	0.957195	0.13159	0.99662	0.914596
ENSG00000055211	0.993998	0.857969	0.968238	0.179795
ENSG00000055332	0.915518	0.203845	0.991343	0.889294
ENSG00000055483	0.978366	0.993648	0.270918	0.757068
ENSG00000055609	0.999033	0.93788	0.985921	0.0771651
ENSG00000055732	0.994411	0.832452	0.975263	0.197874
ENSG00000055813	0.992364	0.995979	0.358874	0.652783
ENSG00000055917	0.71704	0.284758	0.999702	0.9985
ENSG00000055950	0.975615	0.999987	0.0250577	0.999341
ENSG00000056050	0.00806805	0.993006	0.998965	0.999961
ENSG00000056097	0.591258	0.756549	0.822238	0.829954
ENSG00000056277	0.982547	0.221749	0.995919	0.799786
ENSG00000056558	0.978811	0.613331	0.973267	0.434591
ENSG00000056586	0.986409	0.0143168	0.999991	0.999283
ENSG00000056736	0.99938	0.97585	0.976101	0.0486684
ENSG00000056972	0.996721	0.989052	0.778486	0.235742
ENSG00000057019	0.288644	0.711423	0.999974	0.999959
ENSG00000057252	0.997118	0.764714	0.990969	0.247199
ENSG00000057608	0.994431	0.917318	0.946906	0.141344
ENSG00000057657	0.991079	0.981517	0.701969	0.325436
ENSG00000057663	0.982231	0.0876799	0.998784	0.931304
ENSG00000057757	0.757317	0.97717	0.358486	0.907027
ENSG00000057935	0.999879	0.991107	0.986709	0.022305
ENSG00000058056	0.522267	0.512058	0.988607	0.977068
ENSG00000058063	0.997122	0.961772	0.936786	0.104319
ENSG00000058085	0.999817	0.988443	0.98467	0.0270692
ENSG00000058091	0.983585	0.0180185	0.999977	0.99842
ENSG00000058262	0.967951	0.255157	0.992204	0.784687
ENSG00000058272	0.560433	0.442018	0.99938	0.998169
ENSG00000058335	0.999406	0.984247	0.964797	0.0515505
ENSG00000058453	0.993011	0.458755	0.994415	0.553819
ENSG00000058600	0.496779	0.507386	0.998684	0.997151
ENSG00000058668	0.0596836	0.999114	0.941432	0.999771
ENSG00000058673	0.996928	0.933817	0.961099	0.108156
ENSG00000058729	0.0870529	0.912974	0.999982	0.999991
ENSG00000058799	0.999134	0.940544	0.986735	0.0735876
ENSG00000058804	0.998106	0.928624	0.977009	0.0962606
ENSG00000059122	0.86296	0.137041	1	0.999999
ENSG00000059145	0.661611	0.405733	0.983407	0.949248
ENSG00000059377	0.999795	0.986786	0.984983	0.0284363
ENSG00000059378	0.762293	0.444589	0.955039	0.838079
ENSG00000059573	0.997222	0.99181	0.752362	0.258606
ENSG00000059588	0.0728858	0.996895	0.931029	0.99919
ENSG00000059691	0.998032	0.959797	0.957481	0.0846894
ENSG00000059728	0.999855	0.985996	0.989889	0.0242611
ENSG00000059758	0.997585	0.913784	0.976392	0.112238
ENSG00000059769	0.9967	0.981451	0.858831	0.163018
ENSG00000059804	0.998672	0.952816	0.974899	0.073613
ENSG00000059915	0.999843	0.990685	0.98359	0.0258818
ENSG00000060069	0.999186	0.982373	0.957653	0.0607878
ENSG00000060138	0.175606	0.999744	0.824851	0.9998
ENSG00000060140	0.999225	0.980951	0.962509	0.0573148
ENSG00000060237	0.875443	0.164505	0.996384	0.963668
ENSG00000060339	0.98981	0.991765	0.472899	0.545526
ENSG00000060491	0.998562	0.893651	0.988331	0.119456
ENSG00000060642	0.998611	0.984516	0.921239	0.0956337
ENSG00000060656	0.999006	0.953734	0.980482	0.0667781
ENSG00000060688	0.999413	0.990002	0.945481	0.0651046
ENSG00000060718	0.820638	0.997534	0.199388	0.98244
ENSG00000060749	0.99892	0.977551	0.956437	0.0670925
ENSG00000060762	0.827229	0.767187	0.796789	0.608796
ENSG00000060971	0.992526	0.989382	0.608793	0.409299
ENSG00000060982	0.000989582	0.999517	0.999496	0.999997
ENSG00000061273	0.776876	0.728899	0.816238	0.677987
ENSG00000061337	0.00771676	0.992283	1	1
ENSG00000061656	0.99978	0.991064	0.976192	0.0329641
ENSG00000061676	0.896034	0.178494	0.993902	0.93157
ENSG00000061794	0.698887	0.46556	0.957563	0.87799
ENSG00000061918	0.980719	0.99848	0.0999122	0.920888
ENSG00000061936	0.994871	0.734699	0.986827	0.283603
ENSG00000061938	0.97059	0.983317	0.428875	0.617218
ENSG00000061987	0.999697	0.97421	0.988742	0.0373508
ENSG00000062194	0.976738	0.948278	0.744674	0.33031
ENSG00000062282	0.99912	0.945002	0.985407	0.0704719
ENSG00000062370	0.999749	0.980688	0.987493	0.0320703
ENSG00000062485	0.990156	0.0100839	0.999998	0.999763
ENSG00000062582	0.998374	0.851032	0.990931	0.159663
ENSG00000062598	0.99525	0.992519	0.622703	0.389528
ENSG00000062650	0.99926	0.985708	0.95229	0.0627424
ENSG00000062716	0.916956	0.355396	0.975885	0.751762
ENSG00000062725	0.991816	0.994154	0.434874	0.579156
ENSG00000062822	0.192214	0.91743	0.911059	0.979297
ENSG00000063046	0.998062	0.992872	0.788429	0.220638
ENSG00000063169	0.995799	0.834673	0.980541	0.188986
ENSG00000063176	0.990369	0.572096	0.988515	0.44902
ENSG00000063177	0.959813	0.0409455	0.999978	0.999264
ENSG00000063180	0.999379	0.98948	0.9453	0.0658416
ENSG00000063241	0.989253	0.448541	0.992199	0.570007
ENSG00000063244	0.379582	0.992263	0.637794	0.990362
ENSG00000063245	0.727187	0.52134	0.93357	0.817903
ENSG00000063322	0.981549	0.940509	0.806152	0.27179
ENSG00000063438	0.997103	0.978527	0.889316	0.135054
ENSG00000063587	0.9071	0.889613	0.691301	0.511987
ENSG00000063601	0.336697	0.702658	0.98002	0.980625
ENSG00000063660	0.987029	0.0197538	0.999917	0.9933
ENSG00000063761	0.999708	0.984912	0.98144	0.0339402
ENSG00000063854	0.812832	0.733057	0.821632	0.63248
ENSG00000063978	0.97107	0.792146	0.920843	0.315941
ENSG00000064012	0.81524	0.200352	0.998116	0.986292
ENSG00000064042	1.38519e-05	0.999986	1	1
ENSG00000064102	0.97312	0.910106	0.823571	0.293204
ENSG00000064115	0.839318	0.999888	0.161878	0.998916
ENSG00000064199	0.999041	0.991516	0.899657	0.109787
ENSG00000064205	0.999149	0.972911	0.994067	0.577888
ENSG00000064309	0.999726	0.987054	0.979697	0.0335224
ENSG00000064313	0.981635	0.484536	0.985786	0.548044
ENSG00000064393	0.993395	0.996736	0.339819	0.67005
ENSG00000064419	0.971386	0.0287263	0.999998	0.99989
ENSG00000064490	0.99928	0.978048	0.969655	0.0530171
ENSG00000064545	0.91757	0.621275	0.923453	0.537703
ENSG00000064547	0.757608	0.631452	0.879544	0.731396
ENSG00000064601	0.931191	0.0702556	0.999933	0.99862
ENSG00000064607	8.34345e-05	0.999921	0.999996	1
ENSG00000064651	0.335812	0.690911	0.986538	0.986738
ENSG00000064652	0.972987	0.973082	0.565214	0.488717
ENSG00000064666	0.991921	0.951063	0.87824	0.178776
ENSG00000064687	0.996351	0.946766	0.943592	0.113292
ENSG00000064692	0.904418	0.924712	0.595988	0.574882
ENSG00000064703	0.982548	0.905533	0.878511	0.233408
ENSG00000064726	0.915761	0.760952	0.857166	0.466121
ENSG00000064763	0.990456	0.997564	0.218461	0.793519
ENSG00000064932	0.929312	0.27115	0.986164	0.813374
ENSG00000064933	0.544422	0.476541	0.99347	0.985567
ENSG00000064961	0.9574	0.0426259	0.999999	0.999974
ENSG00000064989	0.999547	0.984447	0.972489	0.043517
ENSG00000064995	0.992058	0.147012	0.998723	0.862207
ENSG00000064999	0.999529	0.96355	0.987839	0.0490824
ENSG00000065000	0.896674	0.697866	0.879507	0.525953
ENSG00000065029	0.98137	0.911484	0.863879	0.243267
ENSG00000065054	0.967978	0.0322481	0.999995	0.99978
ENSG00000065057	0.990742	0.900712	0.931721	0.176826
ENSG00000065060	0.916212	0.446482	0.962718	0.674588
ENSG00000065135	0.999886	0.991103	0.987502	0.0215084
ENSG00000065150	0.942266	0.551898	0.954402	0.551435
ENSG00000065154	0.996064	0.792277	0.986014	0.225645
ENSG00000065183	0.00358981	0.998147	0.998283	0.99998
ENSG00000065243	0.750565	0.24962	0.999976	0.99984
ENSG00000065268	0.992205	0.964368	0.841999	0.201428
ENSG00000065308	0.980943	0.990672	0.374004	0.65438
ENSG00000065328	0.00023624	0.99994	0.999824	1
ENSG00000065357	0.381105	0.771312	0.910913	0.93667
ENSG00000065361	0.999035	0.982164	0.950914	0.0678872
ENSG00000065413	0.993055	0.439239	0.994866	0.572839
ENSG00000065427	0.67745	0.983773	0.389855	0.948922
ENSG00000065457	0.518552	0.996765	0.49203	0.992654
ENSG00000065485	0.781192	0.897625	0.59974	0.721442
ENSG00000065491	0.837892	0.211339	0.994237	0.956532
ENSG00000065518	0.999701	0.980334	0.985415	0.0345511
ENSG00000065526	0.973793	0.96441	0.63996	0.421837
ENSG00000065534	0.989166	0.996442	0.267988	0.746404
ENSG00000065548	0.954039	0.885094	0.79387	0.366997
ENSG00000065559	0.999655	0.985868	0.976739	0.0377374
ENSG00000065600	0.999852	0.987756	0.988249	0.024142
ENSG00000065613	0.967436	0.0793126	0.998674	0.954577
ENSG00000065615	0.991296	0.585931	0.988905	0.433867
ENSG00000065621	0.99986	0.987632	0.988984	0.0235235
ENSG00000065665	0.999708	0.975316	0.988642	0.0363341
ENSG00000065717	0.99822	0.975813	0.935947	0.0900205
ENSG00000065802	0.991177	0.958451	0.847076	0.203296
ENSG00000065809	0.496969	0.516722	0.995519	0.99079
ENSG00000065833	0.410851	0.66289	0.965422	0.960837
ENSG00000065882	0.140903	0.883667	0.981884	0.993546
ENSG00000065883	0.999829	0.989031	0.984825	0.026315
ENSG00000065911	0.997458	0.987084	0.842674	0.172783
ENSG00000065923	0.0227592	0.977571	0.999708	0.999962
ENSG00000065970	3.87785e-07	1	1	1
ENSG00000065978	0.990195	1	0.00980524	1
ENSG00000065989	0.999599	0.987582	0.969396	0.0434228
ENSG00000066027	0.97277	0.958689	0.667681	0.40086
ENSG00000066044	0.962514	0.977138	0.457476	0.602872
ENSG00000066056	0.996975	0.795278	0.988819	0.218928
ENSG00000066084	0.00985242	0.991365	0.99884	0.999942
ENSG00000066117	0.873931	0.143144	0.998526	0.984399
ENSG00000066135	0.717666	0.290021	0.99863	0.993683
ENSG00000066136	0.991034	0.0298496	0.99981	0.979306
ENSG00000066230	0.999519	0.977851	0.979546	0.0430839
ENSG00000066279	0.00364148	0.996406	0.999954	0.999998
ENSG00000066322	0.984447	0.450574	0.989203	0.575775
ENSG00000066379	0.974034	0.997104	0.140289	0.888573
ENSG00000066422	0.887068	0.39407	0.965809	0.753053
ENSG00000066427	0.974242	0.987994	0.374667	0.663097
ENSG00000066455	0.991232	0.955603	0.857638	0.195527
ENSG00000066557	0.999058	0.914793	0.990106	0.0960431
ENSG00000066583	0.0636247	0.936378	0.999998	0.999999
ENSG00000066629	0.999497	0.9447	0.991498	0.0643046
ENSG00000066651	0.993665	0.930191	0.929357	0.146788
ENSG00000066654	0.998597	0.952441	0.973783	0.0751787
ENSG00000066697	0.91253	0.998751	0.106789	0.981931
ENSG00000066739	0.998698	0.939033	0.981023	0.0812459
ENSG00000066777	0.999002	0.943493	0.984006	0.0734993
ENSG00000066827	0.998802	0.932763	0.984102	0.0843331
ENSG00000066855	0.999434	0.987298	0.958352	0.0549171
ENSG00000066923	0.997908	0.934562	0.972506	0.0950243
ENSG00000066926	0.960266	0.717324	0.930311	0.3921
ENSG00000066933	0.999554	0.988872	0.962176	0.0493984
ENSG00000067048	0.998862	0.896464	0.99036	0.114314
ENSG00000067057	0.983942	0.984281	0.537067	0.49471
ENSG00000067064	0.725965	1	0.274038	0.999997
ENSG00000067066	0.419235	0.592999	0.995267	0.9925
ENSG00000067082	0.112207	0.887794	0.999999	0.999999
ENSG00000067113	0.965733	0.991462	0.262777	0.780027
ENSG00000067141	0.988392	0.234494	0.996842	0.780272
ENSG00000067167	0.458979	0.98853	0.571219	0.981273
ENSG00000067182	0.999802	0.983172	0.988599	0.0284271
ENSG00000067191	0.819292	0.394067	0.963369	0.823272
ENSG00000067208	0.989925	0.997768	0.197122	0.815185
ENSG00000067221	0.802703	0.309213	0.982493	0.90559
ENSG00000067225	0.712823	0.287198	0.999997	0.999982
ENSG00000067248	0.0675339	0.932626	0.999882	0.999958
ENSG00000067334	0.9899	0.991287	0.489313	0.5295
ENSG00000067365	0.899337	0.22316	0.989332	0.888171
ENSG00000067369	0.999518	0.953261	0.99031	0.056911
ENSG00000067445	0.995262	0.97706	0.843059	0.184619
ENSG00000067533	0.0289889	0.999675	0.971383	0.999954
ENSG00000067560	0.392011	0.608009	0.999994	0.999986
ENSG00000067596	0.462245	0.542743	0.998341	0.99667
ENSG00000067601	0.929194	0.632157	0.926175	0.512474
ENSG00000067606	0.999687	0.990443	0.968685	0.0411839
ENSG00000067646	0.967118	0.113294	0.997591	0.921997
ENSG00000067704	0.994761	0.978895	0.816471	0.209872
ENSG00000067715	0.952197	0.623173	0.946094	0.478535
ENSG00000067798	0.108236	0.893865	0.998515	0.999383
ENSG00000067829	0.999547	0.959267	0.989524	0.0516621
ENSG00000067836	0.974381	0.981216	0.485414	0.558988
ENSG00000067840	0.987089	0.980971	0.633668	0.398272
ENSG00000067900	0.926249	0.158256	0.994778	0.920717
ENSG00000067955	0.986784	0.972891	0.708388	0.331937
ENSG00000067992	0.998758	0.866668	0.992034	0.142539
ENSG00000068001	0.7467	0.927176	0.532617	0.793507
ENSG00000068024	0.990677	0.96017	0.834169	0.214985
ENSG00000068028	0.977577	0.831112	0.918398	0.272913
ENSG00000068078	0.996183	0.942685	0.94517	0.115962
ENSG00000068079	0.339186	0.816988	0.89902	0.944805
ENSG00000068097	0.999892	0.990624	0.988696	0.0207883
ENSG00000068120	0.990346	0.0123045	0.999975	0.997375
ENSG00000068137	0.95893	0.996239	0.140703	0.904129
ENSG00000068305	0.989905	0.959266	0.828218	0.222611
ENSG00000068308	0.979904	0.777436	0.945501	0.297159
ENSG00000068323	0.124816	0.875288	0.999937	0.999959
ENSG00000068354	0.999186	0.986246	0.945804	0.0687645
ENSG00000068366	0.964625	0.802281	0.902052	0.331043
ENSG00000068383	0.998544	0.973941	0.950492	0.0770236
ENSG00000068394	0.995669	0.782307	0.985578	0.236446
ENSG00000068400	0.971678	0.888912	0.847914	0.291496
ENSG00000068438	0.946157	0.894846	0.757482	0.401515
ENSG00000068489	0.77305	0.517963	0.929587	0.779401
ENSG00000068650	0.666808	0.334251	0.999808	0.999133
ENSG00000068654	0.87449	0.999899	0.126832	0.998779
ENSG00000068697	0.988866	0.762603	0.969783	0.278748
ENSG00000068724	0.988907	0.772199	0.968302	0.270592
ENSG00000068745	0.983876	0.834389	0.936486	0.245249
ENSG00000068784	0.997549	0.741105	0.993101	0.268245
ENSG00000068796	0.989	0.145986	0.998351	0.866664
ENSG00000068878	0.172012	0.833843	0.996299	0.997846
ENSG00000068885	0.987419	0.993102	0.384864	0.634616
ENSG00000068903	0.99969	0.98732	0.976602	0.0363876
ENSG00000068912	0.81757	0.437856	0.953807	0.790767
ENSG00000068971	0.94462	0.322708	0.983765	0.748907
ENSG00000069011	0.994735	0.993083	0.579756	0.432426
ENSG00000069020	0.999451	0.978103	0.976531	0.0459147
ENSG00000069248	0.997015	0.931893	0.963366	0.107726
ENSG00000069275	0.992732	0.997922	0.230669	0.778677
ENSG00000069329	0.998601	0.95929	0.969322	0.0727884
ENSG00000069345	0.999401	0.965791	0.983654	0.0511542
ENSG00000069399	0.998276	0.90982	0.983537	0.108367
ENSG00000069424	0.993445	0.868949	0.962454	0.175152
ENSG00000069431	0.803212	0.987625	0.279885	0.929278
ENSG00000069493	0.886289	0.997512	0.143446	0.972753
ENSG00000069509	0.953195	0.988413	0.277292	0.781099
ENSG00000069667	0.997286	0.909317	0.975053	0.118344
ENSG00000069702	0.876494	0.945142	0.490934	0.68743
ENSG00000069849	0.968751	0.994746	0.196713	0.83979
ENSG00000069869	0.00925863	0.991681	0.999105	0.999955
ENSG00000069943	0.998188	0.913249	0.981996	0.106566
ENSG00000069956	0.997581	0.815163	0.989739	0.197518
ENSG00000069966	0.981482	0.596642	0.977699	0.444177
ENSG00000069974	0.0590913	0.945608	0.996103	0.999197
ENSG00000069998	0.0013405	0.999729	0.998933	0.999997
ENSG00000070010	0.991327	0.999335	0.0802962	0.929042
ENSG00000070018	0.97284	0.0271605	1	1
ENSG00000070047	0.646673	0.637459	0.891219	0.824649
ENSG00000070061	0.985021	0.783995	0.956118	0.274866
ENSG00000070081	0.223732	0.915295	0.887779	0.973194
ENSG00000070087	0.0249061	0.978582	0.996787	0.999724
ENSG00000070182	0.961582	0.865466	0.844251	0.3287
ENSG00000070214	0.96134	0.953878	0.627715	0.457067
ENSG00000070269	0.98055	0.099992	0.998477	0.920981
ENSG00000070366	0.999768	0.98947	0.978704	0.032059
ENSG00000070367	0.924561	0.424586	0.967614	0.683239
ENSG00000070371	0.991058	0.36752	0.995217	0.646205
ENSG00000070404	0.776234	0.986222	0.305792	0.931752
ENSG00000070413	0.976318	0.0243379	0.999987	0.999357
ENSG00000070423	0.991651	0.993081	0.473236	0.542033
ENSG00000070444	0.999476	0.947245	0.990721	0.0625578
ENSG00000070476	0.998154	0.989518	0.854374	0.157953
ENSG00000070495	0.989289	0.0273258	0.999825	0.98356
ENSG00000070501	0.974015	0.1322	0.997307	0.896478
ENSG00000070540	0.98999	0.982039	0.672636	0.355335
ENSG00000070610	0.963368	0.0430625	0.999811	0.993759
ENSG00000070614	0.937988	0.941397	0.601526	0.519089
ENSG00000070669	0.999576	1	1	1
ENSG00000070718	0.947583	0.576353	0.952326	0.523737
ENSG00000070756	0.833375	0.341087	0.973848	0.851689
ENSG00000070759	0.929712	0.981035	0.325939	0.763314
ENSG00000070761	0.993794	0.997273	0.311652	0.697281
ENSG00000070770	0.0567246	0.969984	0.975701	0.99759
ENSG00000070778	0.997783	0.988092	0.84862	0.165505
ENSG00000070785	0.0254137	0.999982	0.974607	0.999996
ENSG00000070808	0.998544	0.905549	0.986611	0.109296
ENSG00000070814	0.994431	0.988638	0.686825	0.330105
ENSG00000070831	0.984648	0.740921	0.963916	0.310515
ENSG00000070882	0.894062	0.105943	1	0.999995
ENSG00000070950	0.233932	0.862645	0.930588	0.972835
ENSG00000070961	0.129094	0.99999	0.870924	0.999992
ENSG00000071051	0.999536	0.958024	0.989587	0.052853
ENSG00000071054	1.86111e-05	0.999982	0.999999	1
ENSG00000071082	0.988127	0.982197	0.635242	0.394434
ENSG00000071127	0.996822	0.972275	0.905834	0.125069
ENSG00000071189	0.975292	0.222369	0.994699	0.807639
ENSG00000071205	0.865173	0.986827	0.253718	0.894281
ENSG00000071242	0.997328	0.985355	0.853437	0.16388
ENSG00000071243	0.999114	0.961242	0.979059	0.0605855
ENSG00000071246	0.997345	0.952982	0.952126	0.0975472
ENSG00000071282	0.995967	0.938993	0.946159	0.118882
ENSG00000071462	0.956809	0.563029	0.9614	0.518762
ENSG00000071537	0.997302	0.915742	0.973207	0.113749
ENSG00000071539	0.998875	0.984671	0.934224	0.0822304
ENSG00000071553	0.986118	0.0317283	0.999765	0.982389
ENSG00000071564	0.999541	0.950872	0.991225	0.0583615
ENSG00000071575	0.999596	0.960595	0.990301	0.0495084
ENSG00000071626	0.935566	0.0890154	0.998772	0.976647
ENSG00000071655	0.987262	0.014292	0.999982	0.998465
ENSG00000071794	0.885046	0.998367	0.135266	0.981322
ENSG00000071859	0.986356	0.80881	0.953212	0.251622
ENSG00000071889	0.973382	0.202099	0.995108	0.829412
ENSG00000071894	0.115926	0.884148	0.999953	0.999973
ENSG00000071967	0.988355	0.994006	0.367214	0.650425
ENSG00000071994	0.943048	0.989839	0.240063	0.82705
ENSG00000072041	0.99932	0.988739	0.944314	0.0676276
ENSG00000072042	0.0171428	0.999635	0.983259	0.999963
ENSG00000072062	0.987359	0.428731	0.991709	0.592201
ENSG00000072071	0.997832	0.953636	0.95953	0.0890027
ENSG00000072110	0.996566	0.99382	0.647781	0.361832
ENSG00000072121	0.999727	0.989112	0.97596	0.0352
ENSG00000072133	0.0102983	0.98998	0.999739	0.999982
ENSG00000072134	0.999194	0.96531	0.978651	0.056845
ENSG00000072135	0.998656	0.990154	0.882566	0.128624
ENSG00000072163	0.898955	0.28865	0.982395	0.830001
ENSG00000072195	0.970259	0.0775596	0.998744	0.953437
ENSG00000072201	0.9986	0.988735	0.892556	0.120108
ENSG00000072210	0.999886	0.989142	0.989695	0.0212772
ENSG00000072274	0.603607	0.397264	0.999814	0.999315
ENSG00000072310	0.931108	0.922249	0.65267	0.493973
ENSG00000072364	0.994564	0.539044	0.993924	0.472468
ENSG00000072401	0.965587	0.245799	0.992247	0.796367
ENSG00000072415	0.0580203	0.971528	0.97298	0.997472
ENSG00000072422	0.996141	0.954905	0.930124	0.11883
ENSG00000072501	0.990139	0.980522	0.693967	0.335372
ENSG00000072506	0.520515	0.93445	0.631538	0.913497
ENSG00000072518	0.994375	0.895883	0.958108	0.151635
ENSG00000072571	0.950677	0.0502302	0.999968	0.999125
ENSG00000072609	0.853906	0.160029	0.998606	0.987459
ENSG00000072657	0.276898	0.723221	0.999951	0.999931
ENSG00000072682	0.851803	0.985539	0.267702	0.894957
ENSG00000072736	0.573096	0.987959	0.466931	0.972015
ENSG00000072756	0.993657	0.542229	0.992939	0.471175
ENSG00000072778	0.68964	0.359421	0.989339	0.9616
ENSG00000072786	0.964798	0.123028	0.997187	0.914987
ENSG00000072803	0.999403	0.971361	0.980545	0.0486918
ENSG00000072818	0.99865	0.94089	0.97968	0.0807795
ENSG00000072832	0.997789	0.979494	0.908513	0.114203
ENSG00000072840	0.990291	0.984286	0.64768	0.377742
ENSG00000072849	0.571628	0.804239	0.784179	0.839953
ENSG00000072864	4.02567e-13	1	1	1
ENSG00000072952	0.998628	0.989722	0.885112	0.126538
ENSG00000072954	0.9998	0.988999	0.982398	0.0288025
ENSG00000072958	0.98417	0.0158329	1	0.999997
ENSG00000073008	0.950952	0.972739	0.454162	0.622146
ENSG00000073050	0.999426	0.967679	0.983417	0.0494784
ENSG00000073060	0.999521	0.987026	0.965258	0.0481958
ENSG00000073111	0.000122386	0.999991	0.999887	1
ENSG00000073146	0.999842	0.984452	0.9901	0.0256069
ENSG00000073150	0.31316	0.999901	0.68709	0.999849
ENSG00000073169	0.99933	0.974029	0.97602	0.050621
ENSG00000073331	0.000851461	0.999782	0.999368	0.999998
ENSG00000073350	0.999288	0.968333	0.983488	0.157527
ENSG00000073417	0.527604	0.509018	0.987925	0.975453
ENSG00000073536	0.299539	0.700591	0.999949	0.999921
ENSG00000073578	0.99964	0.983051	0.979756	0.037553
ENSG00000073584	0.995738	0.951454	0.928649	0.124159
ENSG00000073605	0.00618959	0.995178	0.998668	0.999964
ENSG00000073614	0.999724	0.981275	0.985855	0.0331465
ENSG00000073670	0.999835	0.985877	0.988639	0.0256491
ENSG00000073711	0.267454	0.732991	0.999799	0.999755
ENSG00000073712	0.000942327	0.99907	0.999988	1
ENSG00000073756	0.39048	0.928731	0.739548	0.941241
ENSG00000073792	0.0166833	0.983317	1	1
ENSG00000073803	0.974238	0.386824	0.987419	0.651519
ENSG00000073849	0.990232	0.988741	0.563888	0.457138
ENSG00000073905	0.999684	0.98213	0.9831	0.0350859
ENSG00000073910	0.896357	0.909172	0.626983	0.567487
ENSG00000073921	0.994464	0.891471	0.960483	0.153582
ENSG00000073969	0.992189	0.22801	0.997824	0.781977
ENSG00000074047	0.963036	0.741687	0.926209	0.369069
ENSG00000074054	0.999232	0.952974	0.984988	0.0628062
ENSG00000074071	0.998041	0.990429	0.834332	0.177197
ENSG00000074181	0.494155	0.86958	0.750242	0.886023
ENSG00000074201	0.996693	0.942565	0.95195	0.108792
ENSG00000074219	0.997261	0.893429	0.978794	0.130517
ENSG00000074266	0.225117	0.887214	0.914692	0.972977
ENSG00000074319	0.993716	0.860051	0.966153	0.18008
ENSG00000074356	0.995257	0.537659	0.994651	0.472434
ENSG00000074410	0.985692	0.170733	0.99754	0.846035
ENSG00000074416	0.509942	0.494722	0.998616	0.99672
ENSG00000074527	0.54474	0.99732	0.464669	0.993271
ENSG00000074582	0.98656	0.985979	0.548893	0.478567
ENSG00000074590	0.920332	0.213197	0.990631	0.875841
ENSG00000074603	0.994643	0.994642	0.509405	0.50131
ENSG00000074621	0.988886	0.988564	0.538988	0.483562
ENSG00000074657	0.979013	0.996519	0.17743	0.847038
ENSG00000074695	0.702777	0.988239	0.352953	0.956032
ENSG00000074696	0.347866	0.995261	0.662426	0.994447
ENSG00000074755	0.996159	0.875252	0.975577	0.153013
ENSG00000074800	0.991556	0.998523	0.159064	0.850858
ENSG00000074842	0.869409	0.875301	0.678929	0.576362
ENSG00000074855	0.991321	0.949572	0.873569	0.185538
ENSG00000074935	0.980014	0.855904	0.910844	0.253238
ENSG00000074964	0.570373	0.429627	1	1
ENSG00000075073	0.997286	0.953519	0.950389	0.0988054
ENSG00000075089	0.995068	0.707898	0.988842	0.308192
ENSG00000075131	0.0205955	0.999945	0.979467	0.999992
ENSG00000075142	0.996738	0.979462	0.872121	0.151679
ENSG00000075151	0.961077	0.702782	0.935972	0.400168
ENSG00000075188	0.998078	0.947383	0.968252	0.0862871
ENSG00000075213	0.763052	0.475572	0.945626	0.81575
ENSG00000075218	0.593443	0.406991	0.999908	0.999658
ENSG00000075223	0.986803	0.0143111	0.999986	0.998899
ENSG00000075234	0.991147	0.411308	0.994319	0.603226
ENSG00000075239	0.993018	0.453139	0.994553	0.55929
ENSG00000075240	0.90497	0.108892	0.999075	0.987063
ENSG00000075275	0.757994	0.261979	0.996848	0.983179
ENSG00000075292	0.990537	0.0098266	0.999997	0.99964
ENSG00000075303	0.986485	0.0135158	1	0.999999
ENSG00000075336	0.967418	0.98138	0.433205	0.617997
ENSG00000075391	0.000189834	0.999812	0.999998	1
ENSG00000075399	0.996437	0.972562	0.894535	0.136466
ENSG00000075407	0.957699	0.604079	0.95515	0.483073
ENSG00000075413	0.998383	0.942031	0.975521	0.0840642
ENSG00000075415	0.758215	0.47023	0.94774	0.823816
ENSG00000075420	0.991434	0.320667	0.996245	0.691655
ENSG00000075426	0.289566	0.710434	1	1
ENSG00000075539	0.539956	0.54916	0.967235	0.943649
ENSG00000075568	0.948934	0.0749376	0.999041	0.977088
ENSG00000075618	0.0958494	0.918733	0.988465	0.996952
ENSG00000075624	0.635221	0.797132	0.772441	0.795205
ENSG00000075643	0.996975	0.781154	0.989683	0.232189
ENSG00000075651	0.900518	0.977821	0.322975	0.798685
ENSG00000075702	0.986269	0.476967	0.989222	0.547542
ENSG00000075711	0.997099	0.832128	0.986441	0.184332
ENSG00000075785	0.99804	0.99063	0.830984	0.180346
ENSG00000075790	0.998473	0.903803	0.986273	0.111451
ENSG00000075826	0.800545	0.46516	0.945533	0.788763
ENSG00000075856	0.975589	0.989764	0.34963	0.685017
ENSG00000075914	0.972212	0.984603	0.420369	0.622816
ENSG00000075945	0.99158	0.662634	0.985242	0.360544
ENSG00000075975	0.998021	0.81837	0.991303	0.192307
ENSG00000076003	4.08307e-09	1	1	1
ENSG00000076043	0.930373	0.997463	0.115916	0.956248
ENSG00000076053	0.999532	0.971331	0.9846	0.0445374
ENSG00000076067	0.962786	0.0695196	0.99898	0.968714
ENSG00000076108	0.924113	0.303718	0.982272	0.789897
ENSG00000076201	0.976233	0.465634	0.983673	0.57446
ENSG00000076242	0.983585	0.910392	0.878193	0.22783
ENSG00000076248	1.13576e-13	1	1	1
ENSG00000076258	0.998189	0.992278	0.812534	0.197
ENSG00000076321	0.985038	0.363495	0.992708	0.658759
ENSG00000076344	0.99942	0.991517	0.936646	0.0724164
ENSG00000076351	0.431647	0.676963	0.946713	0.944677
ENSG00000076356	0.0267106	0.998531	0.974932	0.999826
ENSG00000076382	0.615337	0.548979	0.944997	0.890687
ENSG00000076513	0.0138563	0.994107	0.99225	0.999787
ENSG00000076554	0.359813	0.644944	0.998024	0.99722
ENSG00000076555	0.999114	0.958854	0.980332	0.0616998
ENSG00000076604	0.999091	0.965421	0.975987	0.0595016
ENSG00000076641	0.978978	0.345696	0.991081	0.684245
ENSG00000076650	0.98903	0.850337	0.948887	0.211746
ENSG00000076662	0.94925	0.925604	0.68876	0.436385
ENSG00000076685	0.980995	0.970732	0.657067	0.391206
ENSG00000076706	0.998742	0.955482	0.974712	0.0710633
ENSG00000076770	0.988486	0.159322	0.9981	0.854092
ENSG00000076924	0.335975	0.991704	0.681054	0.991267
ENSG00000076928	0.999544	0.956986	0.990019	0.0534516
ENSG00000076984	0.944335	0.689685	0.920153	0.445826
ENSG00000077044	0.999572	0.957935	0.990392	0.0521001
ENSG00000077092	0.986408	0.999997	0.999997	0.999975
ENSG00000077097	0.978576	0.999857	0.0290961	0.992471
ENSG00000077147	0.138524	0.865148	0.997542	0.998786
ENSG00000077150	0.988973	0.916971	0.905119	0.188937
ENSG00000077152	0.995142	0.822199	0.979559	0.2031
ENSG00000077157	0.119334	0.951439	0.93802	0.991207
ENSG00000077232	0.957614	0.042386	1	1
ENSG00000077235	0.00589843	0.998389	0.995755	0.999958
ENSG00000077238	0.999842	0.983218	0.990832	0.0261082
ENSG00000077254	0.0965218	0.954927	0.954683	0.993868
ENSG00000077312	0.0132808	1	0.986719	1
ENSG00000077348	0.226985	0.894092	0.906799	0.972125
ENSG00000077380	0.992137	0.939075	0.902689	0.166098
ENSG00000077420	0.907497	0.999993	0.0926267	0.999883
ENSG00000077454	0.0207898	0.979211	1	1
ENSG00000077458	0.927082	0.131804	0.996502	0.944613
ENSG00000077463	0.969636	0.398885	0.984752	0.646727
ENSG00000077514	0.00198726	0.998013	1	1
ENSG00000077549	0.918223	0.831548	0.797659	0.452571
ENSG00000077585	0.999726	0.987428	0.979077	0.0337694
ENSG00000077684	0.993619	0.365233	0.996469	0.644679
ENSG00000077713	0.998672	0.985816	0.917703	0.0978086
ENSG00000077721	0.999699	0.983917	0.98207	0.0343152
ENSG00000077782	0.909952	0.592213	0.928371	0.569464
ENSG00000077942	0.993777	0.904708	0.9497	0.151815
ENSG00000077943	0.998643	0.977934	0.945353	0.0780697
ENSG00000078018	0.976872	0.98009	0.521247	0.521792
ENSG00000078043	0.451458	0.602932	0.977043	0.968567
ENSG00000078053	0.999821	0.990503	0.981717	0.0279587
ENSG00000078061	0.779948	0.335001	0.979941	0.905109
ENSG00000078070	0.982401	0.342519	0.992393	0.682687
ENSG00000078098	0.959684	0.0403189	1	0.999998
ENSG00000078124	0.998848	0.949964	0.979264	0.0719238
ENSG00000078140	0.97282	0.566853	0.972469	0.487858
ENSG00000078142	0.92517	0.839573	0.795561	0.439696
ENSG00000078177	0.99002	0.0264508	0.999836	0.983693
ENSG00000078237	0.984392	0.874566	0.916619	0.224423
ENSG00000078246	0.230539	0.980411	0.801031	0.98802
ENSG00000078269	0.998974	0.929878	0.986865	0.0842827
ENSG00000078304	2.05546e-05	0.999991	0.999989	1
ENSG00000078319	0.999562	0.970075	0.986159	0.0442038
ENSG00000078369	0.998552	0.953196	0.972553	0.0756996
ENSG00000078399	0.972125	0.340852	0.988979	0.698044
ENSG00000078401	0.999458	0.982249	0.971412	0.046881
ENSG00000078403	0.0186711	0.997101	0.984419	0.999809
ENSG00000078487	0.999868	0.986285	0.990576	0.0232718
ENSG00000078579	0.948142	0.963051	0.999916	0.998148
ENSG00000078618	0.998208	0.960635	0.960168	0.0809887
ENSG00000078668	0.999213	0.988258	0.938747	0.0737817
ENSG00000078674	0.713197	0.999905	0.287401	0.999497
ENSG00000078687	0.54605	0.755104	0.843349	0.855496
ENSG00000078699	0.992369	0.972608	0.803623	0.2314
ENSG00000078747	0.986197	0.160804	0.997784	0.855215
ENSG00000078804	0.98796	0.927391	0.883757	0.200893
ENSG00000078808	0.975106	0.0248936	1	1
ENSG00000078902	0.982799	0.0207941	0.999945	0.996463
ENSG00000078967	0.999654	0.973185	0.987698	0.0394631
ENSG00000079102	0.999776	0.986444	0.984031	0.0297487
ENSG00000079134	0.718809	0.663628	0.865716	0.751848
ENSG00000079150	0.999724	0.988022	0.97791	0.0343442
ENSG00000079156	0.231561	0.789475	0.987404	0.991559
ENSG00000079246	0.773561	0.712762	0.831431	0.682247
ENSG00000079257	0.998936	0.987327	0.924969	0.088768
ENSG00000079277	0.103888	0.993233	0.905057	0.997823
ENSG00000079308	0.000307818	0.999776	0.999916	1
ENSG00000079313	0.993444	0.994714	0.459697	0.552145
ENSG00000079332	0.998771	0.933601	0.983503	0.0841253
ENSG00000079335	0.999863	0.987454	0.989376	0.0233068
ENSG00000079337	0.962159	0.979161	0.435519	0.623162
ENSG00000079387	0.526845	0.473158	0.999999	0.999997
ENSG00000079432	0.999861	0.984814	0.991055	0.02427
ENSG00000079435	0.986705	0.239399	0.996367	0.777529
ENSG00000079459	0.00259688	0.999999	0.997404	1
ENSG00000079462	0.992163	0.986502	0.656682	0.364653
ENSG00000079482	0.0859603	0.934056	0.983278	0.996706
ENSG00000079616	0.883169	0.135055	0.998523	0.983253
ENSG00000079691	0.990691	0.996006	0.318548	0.694755
ENSG00000079739	0.985353	0.960326	0.769018	0.285303
ENSG00000079785	0.00624544	0.997724	0.996083	0.999947
ENSG00000079805	0.541165	0.458851	0.999997	0.999987
ENSG00000079819	0.0039115	0.999808	0.996286	0.999994
ENSG00000079841	0.973523	0.0694762	0.998985	0.958016
ENSG00000079931	0.831909	0.97915	0.315092	0.873849
ENSG00000079950	0.977853	0.999731	0.0360454	0.986371
ENSG00000079974	0.996082	0.793029	0.986013	0.224875
ENSG00000079999	0.138998	0.913553	0.957499	0.98995
ENSG00000080031	0.996392	0.914488	0.965544	0.123576
ENSG00000080189	0.998888	0.973884	0.961556	0.0656716
ENSG00000080200	0.951875	0.437949	0.974876	0.635301
ENSG00000080298	0.995923	0.987742	0.761879	0.254457
ENSG00000080345	0.759239	0.242458	0.999759	0.998544
ENSG00000080371	0.98826	0.979523	0.669601	0.362616
ENSG00000080493	4.10209e-05	0.999959	1	1
ENSG00000080503	0.998324	0.987989	0.881699	0.131988
ENSG00000080546	0.993782	0.864453	0.965485	0.17628
ENSG00000080561	0.999723	0.990999	0.970444	0.0388344
ENSG00000080573	0.647966	0.386498	0.991779	0.973757
ENSG00000080603	0.999721	0.977761	0.987977	0.0345402
ENSG00000080608	0.191551	0.86022	0.962613	0.985616
ENSG00000080709	3.47982e-07	1	1	1
ENSG00000080802	0.999774	0.974798	0.991332	0.0340965
ENSG00000080815	0.442101	0.752159	0.893046	0.912694
ENSG00000080819	0.845295	0.993064	0.215262	0.946379
ENSG00000080822	0.958634	0.0475864	0.999801	0.993978
ENSG00000080823	0.99935	0.966198	0.98211	0.0523428
ENSG00000080824	0.999461	0.986327	0.963054	0.0511588
ENSG00000080839	0.033594	0.977906	0.989319	0.999181
ENSG00000080845	0.931352	0.0686487	1	0.999999
ENSG00000080947	0.995237	0.994259	0.554776	0.455728
ENSG00000080986	0.630464	0.453591	0.976561	0.939383
ENSG00000081014	0.949386	0.85009	0.828683	0.37184
ENSG00000081019	0.602566	0.99565	0.413914	0.98787
ENSG00000081026	0.803506	0.651165	0.873335	0.671994
ENSG00000081051	0.999745	0.998549	0.995865	0.849109
ENSG00000081059	0.998843	0.890445	0.990781	0.119931
ENSG00000081087	0.996601	0.893158	0.974203	0.136038
ENSG00000081154	0.984994	0.75906	0.961212	0.294735
ENSG00000081177	0.999752	0.989379	0.977533	0.0333364
ENSG00000081181	0.517465	0.954807	0.596509	0.931219
ENSG00000081189	0.999565	0.967989	0.987155	0.0452908
ENSG00000081307	0.982582	0.708801	0.965823	0.342793
ENSG00000081320	0.0512881	0.949049	0.999733	0.99993
ENSG00000081377	0.987328	0.982779	0.611592	0.418301
ENSG00000081386	0.993896	0.912208	0.945827	0.148069
ENSG00000081665	0.851968	0.638743	0.88918	0.620109
ENSG00000081692	0.216618	0.899893	0.908119	0.97537
ENSG00000081721	0.998347	0.987283	0.889151	0.125219
ENSG00000081760	0.975533	0.984366	0.446556	0.593545
ENSG00000081791	0.967554	0.813348	0.901033	0.318065
ENSG00000081803	0.0794069	0.999871	0.920774	0.999947
ENSG00000081853	0.998668	0.987235	0.908712	0.105384
ENSG00000081870	0.941604	0.36175	0.979626	0.717021
ENSG00000081913	0.509729	0.493407	0.999053	0.997811
ENSG00000081923	0.858053	0.828493	0.744244	0.56921
ENSG00000082014	0.366322	0.908073	0.78387	0.941735
ENSG00000082068	0.994904	0.583736	0.993178	0.428181
ENSG00000082074	0.761248	0.699583	0.840341	0.698828
ENSG00000082126	0.994278	0.828595	0.975382	0.201745
ENSG00000082146	0.997018	0.914551	0.971048	0.117382
ENSG00000082153	0.999648	0.98165	0.981734	0.0369683
ENSG00000082196	0.996808	0.989797	0.769679	0.243716
ENSG00000082212	0.994482	0.984314	0.756174	0.26503
ENSG00000082213	0.715974	0.412994	0.970397	0.900634
ENSG00000082258	0.999424	0.959379	0.986752	0.0544447
ENSG00000082269	0.999269	0.974222	0.973764	0.0527451
ENSG00000082438	0.407645	0.922024	0.736297	0.934035
ENSG00000082458	0.992165	0.987781	0.631813	0.388241
ENSG00000082482	1.22145e-05	0.999989	0.999998	1
ENSG00000082497	0.998753	0.987963	0.909015	0.104269
ENSG00000082512	0.967567	0.0520388	0.99947	0.980924
ENSG00000082515	0.993579	0.567549	0.992102	0.44677
ENSG00000082516	0.856343	0.999701	0.147007	0.996949
ENSG00000082641	0.628197	0.888893	0.653016	0.829894
ENSG00000082701	0.994168	0.55772	0.993044	0.455069
ENSG00000082781	0.00838509	0.991615	1	1
ENSG00000082805	0.997757	0.930189	0.972455	0.0995986
ENSG00000082898	0.986454	0.329504	0.994197	0.689845
ENSG00000082996	0.987376	0.956096	0.809372	0.247156
ENSG00000083093	0.400521	0.938827	0.714523	0.94613
ENSG00000083097	0.964182	0.0375293	0.999952	0.998336
ENSG00000083099	0.997659	0.854342	0.986922	0.161077
ENSG00000083123	0.997318	0.984329	0.861678	0.156675
ENSG00000083168	0.708342	0.903794	0.592223	0.79564
ENSG00000083223	0.998315	0.982901	0.914777	0.104007
ENSG00000083290	0.992852	0.877441	0.956393	0.173315
ENSG00000083312	0.938946	0.870714	0.781561	0.408779
ENSG00000083444	0.952738	0.0472626	1	0.999999
ENSG00000083454	0.999105	0.974445	0.967961	0.058489
ENSG00000083457	0.957779	0.885794	0.803902	0.352525
ENSG00000083520	0.0782236	0.937694	0.986782	0.997301
ENSG00000083535	0.914326	0.0947434	0.999458	0.991473
ENSG00000083544	0.987271	0.292716	0.995369	0.724644
ENSG00000083635	0.985945	0.937548	0.847375	0.229133
ENSG00000083642	0.529252	0.472066	0.999652	0.99903
ENSG00000083720	0.983376	0.957439	0.759985	0.2992
ENSG00000083750	0.976858	0.998398	0.0959732	0.928771
ENSG00000083799	0.675947	0.324153	0.999984	0.999916
ENSG00000083807	0.999794	0.987611	0.983889	0.0287064
ENSG00000083812	0.680015	0.368549	0.988803	0.962632
ENSG00000083814	0.999884	0.991056	0.987343	0.0217166
ENSG00000083817	0.999864	0.98995	0.986771	0.0234157
ENSG00000083828	0.877878	0.362336	0.970427	0.789359
ENSG00000083838	0.999724	0.976851	0.988534	0.0348919
ENSG00000083844	0.99957	0.984314	0.974044	0.0420718
ENSG00000083845	0.837417	0.458348	0.948979	0.755257
ENSG00000083857	0.0032072	0.996977	0.999821	0.999995
ENSG00000083896	0.990269	0.226919	0.997392	0.78542
ENSG00000083937	0.959309	0.0742257	0.998871	0.967595
ENSG00000084070	0.00327747	0.999807	0.996921	0.999995
ENSG00000084072	0.657888	0.456475	0.968166	0.917472
ENSG00000084073	0.323434	0.80036	0.921026	0.95518
ENSG00000084090	1.10722e-05	0.999989	1	1
ENSG00000084092	0.999626	0.962843	0.99044	0.0470903
ENSG00000084093	0.987937	0.0120662	1	0.999997
ENSG00000084112	0.999506	0.975071	0.981364	0.0440594
ENSG00000084207	0.950146	0.146989	0.995724	0.907141
ENSG00000084234	0.832036	0.173923	0.999373	0.994667
ENSG00000084444	0.999305	0.98169	0.964822	0.0541821
ENSG00000084463	0.997136	0.983869	0.857246	0.161749
ENSG00000084623	0.143541	0.856628	0.999897	0.999934
ENSG00000084636	0.964418	0.0355824	1	1
ENSG00000084652	0.991188	0.978851	0.732865	0.297096
ENSG00000084676	0.998905	0.953443	0.978732	0.0689207
ENSG00000084693	0.999557	0.986304	0.969442	0.0446971
ENSG00000084710	0.999714	0.989857	0.97297	0.0374584
ENSG00000084731	0.977921	0.130797	0.997627	0.893654
ENSG00000084733	7.20646e-05	0.999967	0.999961	1
ENSG00000084754	0.936912	0.726732	0.898669	0.437687
ENSG00000084764	0.919303	0.740848	0.87334	0.466509
ENSG00000084774	0.946415	0.960412	0.529941	0.563232
ENSG00000085063	0.0196406	0.991065	0.989686	0.999609
ENSG00000085117	0.894026	0.58189	0.924859	0.599225
ENSG00000085185	0.999569	0.99081	0.955744	0.053877
ENSG00000085224	0.99108	0.66854	0.984067	0.356313
ENSG00000085231	0.999332	0.936211	0.99036	0.0740963
ENSG00000085274	0.998618	0.991669	0.859725	0.149988
ENSG00000085276	0.858976	0.714126	0.850167	0.576731
ENSG00000085365	0.973623	0.027275	0.999981	0.999121
ENSG00000085377	0.960378	0.998793	0.0761158	0.964713
ENSG00000085382	0.994661	0.926419	0.942756	0.136164
ENSG00000085415	0.741479	0.394756	0.971206	0.892559
ENSG00000085433	0.998056	0.854226	0.989012	0.158706
ENSG00000085449	0.986151	0.865872	0.929711	0.218266
ENSG00000085465	0.999587	0.988423	0.966238	0.0457517
ENSG00000085491	0.961435	0.0886002	0.998327	0.951639
ENSG00000085511	0.996984	0.69332	0.993324	0.316373
ENSG00000085563	0.996594	0.916435	0.966519	0.120452
ENSG00000085644	0.999505	0.990264	0.952365	0.0578658
ENSG00000085662	0.926915	0.0782188	0.999738	0.995128
ENSG00000085719	0.993966	0.633805	0.990291	0.381938
ENSG00000085721	0.998115	0.987772	0.871309	0.142804
ENSG00000085733	0.992565	0.871316	0.956979	0.17914
ENSG00000085760	0.892742	0.590496	0.920252	0.59651
ENSG00000085788	0.99523	0.987393	0.739188	0.27819
ENSG00000085831	0.980355	0.723649	0.95943	0.336565
ENSG00000085832	0.878619	0.329731	0.976148	0.815502
ENSG00000085840	0.00386597	0.999839	0.9963	0.999995
ENSG00000085871	0.999334	0.989123	0.943491	0.0680527
ENSG00000085872	0.9908	0.959224	0.839273	0.210702
ENSG00000085978	0.999387	0.990942	0.937475	0.0721949
ENSG00000085982	0.999687	0.969723	0.990105	0.0404851
ENSG00000085998	0.979712	0.986559	0.449635	0.584093
ENSG00000085999	0.208584	0.792234	0.999565	0.999617
ENSG00000086015	0.997451	0.923348	0.971951	0.107249
ENSG00000086061	0.995913	0.892833	0.969565	0.141689
ENSG00000086062	0.278143	0.722331	0.999791	0.999735
ENSG00000086065	0.954356	0.754461	0.90796	0.383222
ENSG00000086102	3.15768e-05	0.999968	1	1
ENSG00000086189	0.786917	0.999953	0.213497	0.999633
ENSG00000086200	0.99201	0.949783	0.881439	0.176768
ENSG00000086232	0.975249	0.0385602	0.999706	0.986485
ENSG00000086475	0.279668	0.95213	0.796997	0.971205
ENSG00000086504	0.997719	0.853227	0.987369	0.161685
ENSG00000086544	0.988143	0.0403308	0.999669	0.971858
ENSG00000086570	0.990652	0.132267	0.998717	0.878364
ENSG00000086589	0.998686	0.988443	0.900767	0.112104
ENSG00000086598	0.645798	0.71919	0.839742	0.79527
ENSG00000086619	0.99909	0.954479	0.981745	0.0646865
ENSG00000086666	0.986731	0.546716	0.986157	0.480395
ENSG00000086696	0.97063	0.998263	0.914332	0.956364
ENSG00000086712	0.966576	0.987707	0.334497	0.71122
ENSG00000086730	0.999742	0.975788	0.989747	0.0347234
ENSG00000086758	0.982296	0.0864748	0.99881	0.932419
ENSG00000086827	0.988019	0.972965	0.726051	0.312965
ENSG00000086848	0.990838	0.66874	0.983574	0.356848
ENSG00000086991	0.956866	0.0596499	0.999426	0.984059
ENSG00000087008	0.999735	0.988757	0.977308	0.0342001
ENSG00000087053	0.973283	0.943515	0.739548	0.343654
ENSG00000087074	0.999774	0.991181	0.975242	0.0338037
ENSG00000087076	0.37129	0.628711	1	1
ENSG00000087077	0.957198	0.0571036	0.999517	0.986182
ENSG00000087086	0.00196865	0.998033	0.999999	1
ENSG00000087087	0.307571	0.838175	0.901048	0.953207
ENSG00000087088	0.119004	0.920059	0.96807	0.992868
ENSG00000087095	0.998033	0.831921	0.990539	0.179507
ENSG00000087111	0.99271	0.992916	0.511092	0.503282
ENSG00000087116	0.425397	0.631363	0.975151	0.96809
ENSG00000087152	0.159575	0.840425	1	1
ENSG00000087157	0.991944	0.927507	0.91678	0.163768
ENSG00000087191	0.977105	0.996141	0.183919	0.842835
ENSG00000087206	0.999446	0.956778	0.988014	0.0557623
ENSG00000087245	0.0303501	0.969652	0.999999	1
ENSG00000087253	0.948079	0.333557	0.983291	0.735074
ENSG00000087258	0.980523	0.844101	0.920587	0.254788
ENSG00000087263	0.987279	0.998247	0.140335	0.874139
ENSG00000087266	0.993736	0.37624	0.996362	0.633663
ENSG00000087269	0.924363	0.997533	0.117795	0.960309
ENSG00000087274	0.726765	0.273239	1	0.999997
ENSG00000087299	0.93109	0.311155	0.982393	0.775362
ENSG00000087301	0.981617	0.181296	0.996778	0.840309
ENSG00000087302	0.994464	0.700026	0.98805	0.31746
ENSG00000087303	0.81854	0.873621	0.654672	0.653168
ENSG00000087338	0.174137	0.825863	1	1
ENSG00000087365	0.990695	0.99906	0.102473	0.907772
ENSG00000087448	0.326971	0.673029	1	1
ENSG00000087460	0.993354	0.955467	0.886182	0.164997
ENSG00000087470	0.999361	0.977014	0.974106	0.0495192
ENSG00000087502	0.901511	0.119177	0.998544	0.980768
ENSG00000087510	0.978002	0.0233105	0.999976	0.998712
ENSG00000087586	0.243671	0.756329	1	1
ENSG00000087589	0.999761	0.984207	0.985418	0.0306139
ENSG00000087842	0.999774	0.988015	0.981835	0.030375
ENSG00000087884	0.999568	0.97902	0.980549	0.0408626
ENSG00000087903	0.999746	0.985908	0.982658	0.0316884
ENSG00000087995	0.993688	0.951896	0.898711	0.155705
ENSG00000088035	0.999093	0.964133	0.976853	0.0599217
ENSG00000088038	0.989127	0.0113329	0.999995	0.999545
ENSG00000088179	0.985992	0.474715	0.989133	0.550161
ENSG00000088205	0.271513	0.82489	0.935053	0.968543
ENSG00000088247	0.995497	0.979781	0.831633	0.193089
ENSG00000088256	0.98724	0.519227	0.987987	0.505546
ENSG00000088280	0.998893	0.986001	0.929335	0.0857716
ENSG00000088298	0.991905	0.627566	0.987696	0.392833
ENSG00000088305	0.980392	0.0200382	0.999993	0.999577
ENSG00000088325	0.385646	0.614764	0.999854	0.999736
ENSG00000088340	0.95916	0.985399	0.998505	0.982082
ENSG00000088356	0.998427	0.969077	0.954963	0.0775327
ENSG00000088367	0.999455	0.943529	0.991002	0.0660151
ENSG00000088387	0.484168	0.515833	1	1
ENSG00000088448	0.952216	0.901763	0.758159	0.387862
ENSG00000088451	0.999371	0.950713	0.988162	0.0617543
ENSG00000088538	0.999666	0.98628	0.97676	0.0372937
ENSG00000088543	0.999501	0.944546	0.991584	0.0643688
ENSG00000088682	0.619242	0.593256	0.923642	0.86386
ENSG00000088727	0.997047	0.960652	0.936836	0.105465
ENSG00000088756	0.999762	0.986446	0.983103	0.0306894
ENSG00000088766	0.983193	1	0.0168078	1
ENSG00000088808	0.961521	0.211908	0.993307	0.833263
ENSG00000088812	0.984183	0.0167254	0.999987	0.999104
ENSG00000088826	0.995024	0.808986	0.98087	0.21512
ENSG00000088832	0.102881	0.995767	0.902811	0.998541
ENSG00000088833	0.791065	0.971481	0.369089	0.868365
ENSG00000088836	0.998047	0.882241	0.986052	0.13366
ENSG00000088854	0.1326	0.980117	0.893358	0.993925
ENSG00000088876	0.99591	0.846212	0.979478	0.1784
ENSG00000088888	0.654142	0.993308	0.374031	0.978519
ENSG00000088899	0.978667	0.95155	0.745955	0.323828
ENSG00000088930	0.782185	0.285089	0.988977	0.943749
ENSG00000088970	0.998472	0.991019	0.857263	0.153245
ENSG00000088986	0.264418	0.739338	0.998045	0.998199
ENSG00000089006	0.665444	0.334603	0.999993	0.99996
ENSG00000089009	0.981887	0.992892	0.322556	0.702665
ENSG00000089022	0.984056	0.561491	0.982798	0.471654
ENSG00000089048	0.984407	0.338009	0.993252	0.684333
ENSG00000089050	0.139662	0.873381	0.990752	0.996206
ENSG00000089053	0.985637	0.998296	0.127648	0.888419
ENSG00000089057	0.000786085	0.999214	1	1
ENSG00000089060	0.960052	0.992207	0.229771	0.81797
ENSG00000089063	0.993948	0.889655	0.957944	0.158452
ENSG00000089091	0.826915	0.754242	0.804948	0.613895
ENSG00000089094	0.0915171	0.908483	1	1
ENSG00000089123	0.989714	0.520466	0.990004	0.499816
ENSG00000089127	0.875131	1	1	1
ENSG00000089154	0.976868	0.908377	0.843099	0.271656
ENSG00000089157	0.998529	0.897899	0.987557	0.116015
ENSG00000089159	0.929509	0.999468	0.0809385	0.990085
ENSG00000089163	0.997747	0.991932	0.785593	0.224728
ENSG00000089177	0.996486	0.741609	0.990356	0.271549
ENSG00000089195	0.971856	0.985426	0.402405	0.640312
ENSG00000089220	0.882182	0.740932	0.844226	0.532661
ENSG00000089225	0.999105	0.986008	0.941883	0.0730038
ENSG00000089234	0.998209	0.981766	0.915188	0.104837
ENSG00000089248	0.818957	0.850674	0.693864	0.636505
ENSG00000089280	0.159129	0.840871	1	1
ENSG00000089289	0.81722	0.994369	0.226358	0.962052
ENSG00000089327	0.98892	0.999845	0.0253708	0.985864
ENSG00000089335	0.988787	0.0602003	0.999443	0.951569
ENSG00000089351	0.999724	0.979576	0.987036	0.0336634
ENSG00000089472	0.999657	0.990648	0.965086	0.0446085
ENSG00000089486	0.990785	0.405193	0.994261	0.609761
ENSG00000089505	0.997093	0.925476	0.967402	0.110029
ENSG00000089597	0.981077	0.905452	0.870645	0.242826
ENSG00000089639	0.966649	0.735012	0.933223	0.365115
ENSG00000089682	0.999538	0.989238	0.959584	0.0516396
ENSG00000089685	0.242088	0.762908	0.997298	0.997706
ENSG00000089692	0.493754	0.511644	0.998258	0.996344
ENSG00000089693	0.447246	0.553686	0.999695	0.999374
ENSG00000089723	0.999226	0.964581	0.979838	0.0563552
ENSG00000089737	0.247526	0.999647	0.753204	0.999622
ENSG00000089775	0.998287	0.931065	0.978305	0.0923426
ENSG00000089818	0.997868	0.940508	0.969151	0.0924731
ENSG00000089820	0.997479	0.924647	0.971624	0.106251
ENSG00000089847	0.999398	0.982855	0.967294	0.0504528
ENSG00000089876	0.999408	0.986945	0.957748	0.0558988
ENSG00000089902	0.841587	0.167732	0.999048	0.991633
ENSG00000089916	0.409432	0.997749	0.596524	0.996295
ENSG00000090006	0.963593	0.795344	0.903724	0.33734
ENSG00000090013	0.999829	0.985861	0.988277	0.0260323
ENSG00000090020	0.9916	0.993007	0.475487	0.539905
ENSG00000090054	0.998138	0.938738	0.973607	0.0895165
ENSG00000090060	0.377412	0.818906	0.871872	0.93181
ENSG00000090061	0.996167	0.818588	0.983985	0.20126
ENSG00000090097	0.992512	0.27395	0.997318	0.73622
ENSG00000090238	0.999687	0.984443	0.980726	0.0351445
ENSG00000090263	0.965074	0.615252	0.959019	0.460655
ENSG00000090266	0.701856	0.441596	0.963869	0.892679
ENSG00000090273	0.991644	0.993111	0.471958	0.543287
ENSG00000090316	0.984155	0.993463	0.328189	0.694192
ENSG00000090339	0.992998	0.931466	0.922014	0.153523
ENSG00000090372	0.983675	0.896045	0.89422	0.226059
ENSG00000090432	0.809165	0.967514	0.381022	0.842299
ENSG00000090447	0.94862	0.0513804	1	1
ENSG00000090470	0.946744	0.977218	0.399079	0.676959
ENSG00000090487	0.991602	0.984197	0.678957	0.345243
ENSG00000090520	0.978748	0.988895	0.393948	0.638409
ENSG00000090530	0.994445	0.825843	0.976466	0.203245
ENSG00000090554	0.999884	0.989035	0.989647	0.0214338
ENSG00000090565	0.944661	0.0553724	0.999999	0.999968
ENSG00000090581	0.91324	0.0867642	1	0.999996
ENSG00000090612	0.48767	0.546976	0.987139	0.978215
ENSG00000090615	0.994698	0.944314	0.924845	0.136143
ENSG00000090621	0.0347597	0.966622	0.998803	0.999815
ENSG00000090661	0.999843	0.990788	0.983454	0.0259148
ENSG00000090674	0.998996	0.973915	0.964958	0.062131
ENSG00000090686	0.0142489	0.990846	0.995096	0.999809
ENSG00000090776	0.992257	0.467423	0.993691	0.546629
ENSG00000090857	0.99123	0.942682	0.886926	0.179162
ENSG00000090861	0.940279	0.997062	0.119705	0.942954
ENSG00000090863	0.998048	0.987687	0.868212	0.146053
ENSG00000090889	0.375026	0.799392	0.892089	0.933493
ENSG00000090905	0.999376	0.985446	0.960136	0.0550418
ENSG00000090924	0.995771	0.678328	0.991482	0.334418
ENSG00000090971	0.00207858	0.99895	0.998979	0.999992
ENSG00000090975	0.971692	0.81676	0.909177	0.302371
ENSG00000090989	0.951045	0.990088	0.249017	0.809851
ENSG00000091009	0.967488	0.10758	0.997766	0.927166
ENSG00000091039	0.982617	0.284377	0.994279	0.738727
ENSG00000091073	0.993543	0.65935	0.988474	0.358632
ENSG00000091127	0.000116398	0.999996	0.999888	1
ENSG00000091136	0.999662	0.991165	0.963543	0.0456291
ENSG00000091140	0.825276	0.725247	0.828543	0.620934
ENSG00000091157	0.99618	0.874976	0.975759	0.153086
ENSG00000091164	0.993596	0.918237	0.939569	0.148598
ENSG00000091262	0.999658	0.999995	0.999999	0.999855
ENSG00000091317	0.998092	0.911656	0.981509	0.108744
ENSG00000091409	0.994517	0.578886	0.992852	0.433745
ENSG00000091436	0.335832	0.664423	0.999904	0.999841
ENSG00000091483	0.0389093	0.968318	0.993552	0.99922
ENSG00000091490	0.00921566	0.999542	0.991269	0.999974
ENSG00000091527	0.999245	0.940886	0.988304	0.0715641
ENSG00000091542	0.996927	0.991956	0.729979	0.281137
ENSG00000091592	0.816843	0.398051	0.962536	0.82257
ENSG00000091622	0.999461	0.981507	0.972683	0.0463492
ENSG00000091640	0.670582	0.351684	0.995057	0.982677
ENSG00000091651	0.392898	0.85183	0.830201	0.92507
ENSG00000091656	0.999617	0.976393	0.984585	0.0394056
ENSG00000091732	0.782424	0.231148	0.998049	0.988379
ENSG00000091844	0.999842	0.984069	0.990354	0.0257343
ENSG00000091947	0.998465	0.974868	0.946138	0.0805287
ENSG00000091986	0.949219	0.997363	0.112651	0.940767
ENSG00000092010	0.119641	0.985062	0.899977	0.995319
ENSG00000092020	0.980581	0.0337759	0.999751	0.985892
ENSG00000092036	0.997779	0.910772	0.978922	0.112527
ENSG00000092068	0.999806	0.987324	0.985155	0.0277157
ENSG00000092094	0.957461	0.0502201	0.999743	0.992576
ENSG00000092096	0.99902	0.939259	0.98543	0.0762907
ENSG00000092098	0.998742	0.932628	0.983378	0.0852518
ENSG00000092108	0.740233	0.318531	0.989074	0.952162
ENSG00000092140	0.980054	0.561063	0.97921	0.479672
ENSG00000092148	0.990613	0.148429	0.998521	0.862437
ENSG00000092199	6.60278e-09	1	1	1
ENSG00000092201	0.701105	0.566754	0.918615	0.813526
ENSG00000092203	0.999477	0.947322	0.990723	0.0624787
ENSG00000092208	0.999887	0.989758	0.989203	0.0211514
ENSG00000092295	0.989418	0.0140507	0.999964	0.996567
ENSG00000092330	0.988966	0.242064	0.996853	0.772118
ENSG00000092421	0.999498	0.987747	0.961544	0.0512107
ENSG00000092439	0.394739	0.643432	0.982464	0.979365
ENSG00000092445	0.839853	0.976855	0.325455	0.857837
ENSG00000092470	3.91176e-05	0.999998	0.999962	1
ENSG00000092529	0.996005	0.93629	0.948901	0.118805
ENSG00000092531	0.999833	0.981432	0.991236	0.0274994
ENSG00000092607	0.991582	0.815876	0.967966	0.224576
ENSG00000092621	0.692345	0.957814	0.468483	0.881359
ENSG00000092820	0.992516	0.252051	0.997606	0.757826
ENSG00000092841	0.975952	0.979942	0.51499	0.529116
ENSG00000092847	0.871363	0.632806	0.896138	0.599692
ENSG00000092853	0.00654731	0.993966	0.999506	0.99998
ENSG00000092871	0.970339	0.0707592	0.998921	0.959981
ENSG00000092931	0.997464	0.927046	0.970505	0.104985
ENSG00000092964	0.933363	0.990957	0.214927	0.860754
ENSG00000092969	0.494544	0.632157	0.94565	0.927649
ENSG00000092978	0.998025	0.836106	0.990239	0.17563
ENSG00000093000	0.99932	0.988717	0.944448	0.0675153
ENSG00000093009	0.000886003	0.999126	0.999988	1
ENSG00000093010	0.865319	0.961558	0.410153	0.762969
ENSG00000093144	0.994246	0.961399	0.884734	0.159621
ENSG00000093167	0.896922	0.125337	0.998364	0.979377
ENSG00000093183	0.994825	0.768633	0.984201	0.252341
ENSG00000093217	0.514405	0.950986	0.604346	0.930264
ENSG00000094631	0.769642	0.998512	0.240662	0.991183
ENSG00000094804	7.12131e-05	0.999997	0.999932	1
ENSG00000094841	0.998233	0.918693	0.981175	0.101899
ENSG00000094880	0.998291	0.932954	0.977764	0.0909909
ENSG00000094914	0.998579	0.983806	0.922813	0.0948029
ENSG00000094916	0.988391	0.0299591	0.999792	0.981858
ENSG00000094975	0.999613	0.982368	0.979135	0.0388841
ENSG00000095002	0.00561109	0.994495	0.999898	0.999996
ENSG00000095015	0.998176	0.874631	0.987774	0.139418
ENSG00000095059	0.971906	0.0282858	0.999996	0.999812
ENSG00000095066	0.998789	0.967387	0.966545	0.0672787
ENSG00000095139	0.98408	0.180977	0.997119	0.837825
ENSG00000095209	0.371692	0.824339	0.870471	0.933498
ENSG00000095261	0.903831	0.146437	0.996314	0.953419
ENSG00000095303	0.869627	0.135026	0.999613	0.995735
ENSG00000095319	0.9955	0.986406	0.764371	0.253723
ENSG00000095321	0.0210637	0.978939	0.999998	1
ENSG00000095380	0.599032	0.78616	0.795303	0.819505
ENSG00000095383	0.992399	0.90025	0.942767	0.164584
ENSG00000095397	0.99981	0.982102	0.989723	0.0283653
ENSG00000095485	0.999282	0.990962	0.927385	0.0823717
ENSG00000095539	0.99929	0.98506	0.956066	0.059584
ENSG00000095564	0.986321	0.634521	0.979921	0.399237
ENSG00000095574	0.999838	0.985849	0.988897	0.0254158
ENSG00000095637	0.999873	0.988194	0.989477	0.0224566
ENSG00000095739	0.991797	0.991551	0.529682	0.48697
ENSG00000095752	0.997265	0.993275	0.714641	0.294819
ENSG00000095787	0.447137	0.791663	0.856031	0.905168
ENSG00000095794	0.999886	0.989573	0.989348	0.0211929
ENSG00000095906	0.692616	0.330061	0.995446	0.981877
ENSG00000095951	0.991506	0.997022	0.273493	0.73798
ENSG00000096060	0.285374	0.721163	0.996757	0.996707
ENSG00000096063	0.992542	0.793759	0.974845	0.238853
ENSG00000096070	0.999121	0.981892	0.95558	0.0634074
ENSG00000096080	0.999361	0.941301	0.989942	0.0693963
ENSG00000096092	0.470633	0.773195	0.862128	0.894045
ENSG00000096093	0.995161	0.984758	0.773318	0.246763
ENSG00000096384	0.834251	0.999384	0.17158	0.994785
ENSG00000096401	0.683043	0.320908	0.999239	0.996809
ENSG00000096433	0.988271	0.97284	0.73243	0.306459
ENSG00000096654	0.996067	0.990119	0.725823	0.287991
ENSG00000096696	0.999771	0.981044	0.988357	0.0308281
ENSG00000096717	0.999871	0.99085	0.986254	0.0230243
ENSG00000096746	0.145212	0.982887	0.877939	0.993962
ENSG00000096872	0.998118	0.980879	0.915485	0.105517
ENSG00000096968	0.997848	0.986249	0.870595	0.145309
ENSG00000097007	0.412258	0.587744	0.999999	0.999998
ENSG00000097021	0.984076	0.989356	0.440214	0.586353
ENSG00000097033	0.913803	0.941374	0.549677	0.595146
ENSG00000097046	0.59723	0.440334	0.989591	0.972845
ENSG00000097096	0.991624	0.516492	0.991823	0.500061
ENSG00000099194	0.155315	0.999997	0.844692	0.999997
ENSG00000099203	0.985808	0.327746	0.994013	0.692433
ENSG00000099204	0.986201	0.975379	0.678687	0.359733
ENSG00000099219	0.998346	0.989337	0.869514	0.142803
ENSG00000099246	0.57982	0.42018	1	1
ENSG00000099250	0.998839	0.940488	0.982543	0.0781293
ENSG00000099256	0.77254	0.843634	0.695403	0.688423
ENSG00000099282	0.974858	0.911654	0.827464	0.286025
ENSG00000099290	0.990508	0.958077	0.840353	0.211062
ENSG00000099308	0.993419	0.69953	0.98603	0.321022
ENSG00000099326	0.996627	0.827211	0.984884	0.191278
ENSG00000099330	0.99876	0.971107	0.961415	0.0687177
ENSG00000099331	0.998467	0.914681	0.984371	0.102481
ENSG00000099337	0.993217	0.997893	0.243859	0.765031
ENSG00000099341	0.983078	0.996902	0.184574	0.835446
ENSG00000099364	0.988495	0.0149328	0.999962	0.99661
ENSG00000099365	0.916721	0.101772	0.998857	0.98265
ENSG00000099377	0.400865	0.660206	0.971518	0.967411
ENSG00000099381	0.98422	0.933582	0.842192	0.240006
ENSG00000099385	0.716882	0.999941	0.283504	0.999674
ENSG00000099622	0.998908	0.924722	0.987036	0.0893335
ENSG00000099624	0.197007	0.999999	0.802996	0.999998
ENSG00000099625	0.973399	0.999364	0.0538226	0.973414
ENSG00000099725	0.822107	0.627281	0.888128	0.662485
ENSG00000099783	0.97239	0.999772	0.0374686	0.990369
ENSG00000099785	0.999696	0.970178	0.990243	0.0398833
ENSG00000099795	0.357845	0.647227	0.997801	0.997128
ENSG00000099797	0.999344	0.978771	0.971307	0.0505777
ENSG00000099800	0.177818	0.873818	0.961638	0.986727
ENSG00000099804	0.99778	0.866614	0.986307	0.149299
ENSG00000099810	0.0228748	0.977468	0.999693	0.999964
ENSG00000099814	0.965228	0.985458	0.366991	0.682323
ENSG00000099817	0.968753	0.632247	0.960257	0.438743
ENSG00000099821	0.0159706	0.984065	0.999968	0.999996
ENSG00000099822	0.989016	0.232636	0.997027	0.781321
ENSG00000099840	0.998695	0.992381	0.855177	0.153747
ENSG00000099849	0.946982	0.979761	0.373673	0.699583
ENSG00000099860	0.0843333	0.952427	0.967935	0.995305
ENSG00000099875	0.955923	0.999773	0.0507918	0.993512
ENSG00000099889	0.936134	0.724012	0.897595	0.442259
ENSG00000099899	0.688415	0.312492	0.999847	0.999245
ENSG00000099901	0.986382	0.99979	0.0297765	0.98405
ENSG00000099904	0.998828	0.940186	0.982472	0.0785139
ENSG00000099910	0.699915	0.300085	1	1
ENSG00000099917	0.940336	0.06519	0.999761	0.994713
ENSG00000099940	0.998556	0.954084	0.972018	0.0753413
ENSG00000099942	0.966001	0.999951	0.035871	0.998177
ENSG00000099949	0.986692	0.997735	0.167297	0.848276
ENSG00000099953	0.98531	0.0615709	0.999327	0.953792
ENSG00000099956	0.991138	0.00988957	0.999991	0.998981
ENSG00000099957	0.973335	0.981823	0.469116	0.575726
ENSG00000099968	0.97463	0.979543	0.508903	0.536925
ENSG00000099974	0.970902	0.902844	0.824215	0.30204
ENSG00000099991	0.0516153	0.990707	0.959029	0.998648
ENSG00000099992	0.994094	0.968186	0.860038	0.177682
ENSG00000099995	0.788472	0.999979	0.211723	0.999826
ENSG00000099999	0.952561	0.349271	0.983258	0.71491
ENSG00000100003	0.955655	0.927617	0.708058	0.408671
ENSG00000100014	0.999397	0.949743	0.988863	0.0619967
ENSG00000100023	0.998806	0.935619	0.983451	0.0821241
ENSG00000100028	0.682695	0.361952	0.98988	0.965473
ENSG00000100029	0.935182	0.986062	0.276412	0.802343
ENSG00000100030	0.629842	0.393862	0.99423	0.982065
ENSG00000100034	0.805261	0.78061	0.777724	0.636405
ENSG00000100036	0.767894	0.263038	0.99515	0.973918
ENSG00000100038	0.988278	0.967804	0.764824	0.279094
ENSG00000100056	0.981564	0.70069	0.965111	0.352635
ENSG00000100058	0.978986	0.962675	0.693321	0.365018
ENSG00000100065	0.996472	0.786664	0.987748	0.229115
ENSG00000100068	0.998669	0.852575	0.992388	0.156368
ENSG00000100075	0.467349	0.984891	0.572154	0.975606
ENSG00000100077	0.996367	0.916197	0.964425	0.123011
ENSG00000100083	0.998528	0.936558	0.979548	0.0853658
ENSG00000100084	0.99931	0.989728	0.938269	0.0726931
ENSG00000100092	0.998141	0.977868	0.927389	0.0966027
ENSG00000100097	0.986455	0.305385	0.994841	0.713319
ENSG00000100099	0.925716	0.963106	0.460325	0.650853
ENSG00000100100	0.993361	0.99429	0.476393	0.535955
ENSG00000100104	0.999845	0.983955	0.990591	0.0256091
ENSG00000100105	0.761237	0.239342	0.999926	0.999496
ENSG00000100106	0.973166	0.0957112	0.9983	0.932823
ENSG00000100109	0.740993	0.919259	0.553785	0.785963
ENSG00000100116	0.911243	0.986122	0.259249	0.843386
ENSG00000100124	0.984175	0.846793	0.931874	0.237157
ENSG00000100129	0.998396	0.967769	0.956132	0.0777035
ENSG00000100138	0.999526	0.989659	0.956947	0.0538676
ENSG00000100139	0.995482	0.911351	0.959295	0.133873
ENSG00000100142	0.505615	0.929311	0.651189	0.913886
ENSG00000100147	0.999681	0.987231	0.976099	0.0369891
ENSG00000100150	0.999822	0.984824	0.988646	0.0267078
ENSG00000100151	0.97044	0.412577	0.984352	0.632632
ENSG00000100154	0.998734	0.95916	0.972174	0.0699323
ENSG00000100162	0.995635	0.989388	0.72091	0.294068
ENSG00000100196	0.732164	0.797413	0.754111	0.716312
ENSG00000100201	0.649483	0.36102	0.997636	0.991861
ENSG00000100206	0.978577	0.70641	0.959746	0.355266
ENSG00000100207	0.999168	0.969033	0.975304	0.0564939
ENSG00000100209	0.998115	0.934657	0.974923	0.0923056
ENSG00000100211	0.995198	0.967468	0.884518	0.152817
ENSG00000100216	0.256992	0.941761	0.829256	0.971991
ENSG00000100219	0.911471	0.996651	0.137755	0.954123
ENSG00000100220	0.934336	0.297549	0.984165	0.78395
ENSG00000100221	0.307701	0.693742	0.99937	0.999187
ENSG00000100225	0.696884	0.315237	0.997622	0.990257
ENSG00000100226	0.99412	0.916376	0.945256	0.144249
ENSG00000100227	0.974211	0.826529	0.911372	0.287888
ENSG00000100228	0.986526	0.893863	0.91156	0.208051
ENSG00000100234	0.828663	0.990667	0.243953	0.936717
ENSG00000100239	0.99742	0.915099	0.974494	0.112987
ENSG00000100241	0.918819	0.105499	0.998541	0.977142
ENSG00000100242	0.848374	0.151762	0.999989	0.999875
ENSG00000100243	0.998366	0.916812	0.982962	0.101859
ENSG00000100246	0.998273	0.978483	0.930192	0.0930511
ENSG00000100258	0.999565	0.991149	0.95368	0.0556065
ENSG00000100263	0.899694	0.101385	0.99993	0.998992
ENSG00000100266	0.557794	0.795048	0.802381	0.844777
ENSG00000100271	0.995998	0.969055	0.895904	0.139043
ENSG00000100280	0.95206	0.994649	0.16977	0.883521
ENSG00000100281	0.82521	0.179743	0.999455	0.995592
ENSG00000100284	0.988138	0.0119915	0.999999	0.999872
ENSG00000100288	0.996715	0.992376	0.705205	0.305704
ENSG00000100292	0.496437	0.869564	0.748943	0.885056
ENSG00000100294	0.72077	0.355295	0.983875	0.94006
ENSG00000100296	0.99971	0.975187	0.988783	0.0363197
ENSG00000100297	0.00377734	0.999844	0.996384	0.999995
ENSG00000100299	0.997314	0.991828	0.757782	0.253077
ENSG00000100300	0.987467	0.0135695	0.999988	0.998975
ENSG00000100304	0.570763	0.993796	0.451139	0.984302
ENSG00000100307	0.967589	0.96634	0.584391	0.481681
ENSG00000100316	0.995455	0.970167	0.880516	0.153862
ENSG00000100319	0.907202	0.125009	0.997738	0.970051
ENSG00000100320	0.973485	0.975624	0.544065	0.506826
ENSG00000100321	0.957598	0.971415	0.491712	0.579274
ENSG00000100324	0.994935	0.572347	0.993501	0.439217
ENSG00000100325	0.991222	0.985424	0.649735	0.373619
ENSG00000100330	0.998429	0.971153	0.95183	0.0785871
ENSG00000100335	0.889677	0.999578	0.116121	0.994624
ENSG00000100342	0.386592	0.980116	0.656529	0.976763
ENSG00000100344	0.99518	0.979002	0.827343	0.198475
ENSG00000100345	0.989204	0.991877	0.457797	0.561122
ENSG00000100347	0.826622	0.90893	0.581027	0.68342
ENSG00000100348	0.999737	0.991126	0.971531	0.0376057
ENSG00000100350	0.0656429	0.936631	0.99819	0.999536
ENSG00000100353	0.988336	0.273811	0.996101	0.741753
ENSG00000100354	0.964949	0.0350574	1	0.999994
ENSG00000100359	0.926762	0.743947	0.878994	0.450298
ENSG00000100360	0.983816	0.986662	0.49355	0.535972
ENSG00000100364	0.845625	0.156352	0.999817	0.998206
ENSG00000100372	0.625885	0.920533	0.592474	0.861108
ENSG00000100376	0.958931	0.999324	0.0614836	0.980262
ENSG00000100379	0.455179	0.552243	0.997338	0.995239
ENSG00000100380	0.972919	0.337932	0.98948	0.699669
ENSG00000100387	0.999244	0.957125	0.983761	0.0598708
ENSG00000100393	0.982498	0.0448813	0.999553	0.973067
ENSG00000100395	0.979119	0.977417	0.574526	0.468938
ENSG00000100401	0.972967	0.0944213	0.998329	0.934283
ENSG00000100403	0.99614	0.992936	0.654349	0.356575
ENSG00000100410	0.998776	0.990113	0.892127	0.118984
ENSG00000100412	0.998059	0.83095	0.990725	0.180265
ENSG00000100413	0.0675854	0.986799	0.947757	0.997859
ENSG00000100416	0.692369	0.308131	0.999916	0.999584
ENSG00000100417	0.928596	0.162788	0.994515	0.914101
ENSG00000100418	0.999755	0.986889	0.981995	0.0313615
ENSG00000100422	0.0677992	0.992029	0.941786	0.998386
ENSG00000100425	0.987961	0.975179	0.707341	0.329519
ENSG00000100426	0.99652	0.895158	0.972983	0.135339
ENSG00000100429	0.996713	0.873098	0.97914	0.151049
ENSG00000100439	0.999345	0.990589	0.935873	0.0741932
ENSG00000100441	0.733781	0.98087	0.358272	0.927077
ENSG00000100442	0.927796	0.84554	0.795229	0.431436
ENSG00000100445	0.999695	0.981278	0.984423	0.0346042
ENSG00000100461	0.999448	0.958648	0.987537	0.0543658
ENSG00000100462	0.962946	0.999788	0.044284	0.992981
ENSG00000100478	0.999742	0.985248	0.983188	0.0318221
ENSG00000100479	0.0583701	0.982791	0.961074	0.997765
ENSG00000100483	0.985797	0.0768041	0.999113	0.938286
ENSG00000100485	0.999053	0.974615	0.966012	0.0603196
ENSG00000100490	0.999308	0.980543	0.967057	0.053092
ENSG00000100503	0.788051	0.602626	0.896487	0.712835
ENSG00000100504	0.761137	0.956661	0.435791	0.846411
ENSG00000100519	0.826666	0.987749	0.262784	0.922802
ENSG00000100522	0.99792	0.976893	0.922687	0.102501
ENSG00000100523	0.977393	0.102334	0.998267	0.922006
ENSG00000100526	0.180103	0.847322	0.980934	0.991641
ENSG00000100528	0.945327	0.0566724	0.999922	0.998078
ENSG00000100532	0.999671	0.973565	0.988113	0.038651
ENSG00000100554	0.974601	0.888535	0.860257	0.276606
ENSG00000100558	0.998758	0.922182	0.985885	0.0931753
ENSG00000100564	0.999834	0.987753	0.986812	0.0256019
ENSG00000100567	0.972613	0.863468	0.878996	0.284923
ENSG00000100568	0.966818	0.297635	0.989926	0.745621
ENSG00000100575	0.997709	0.939906	0.967237	0.0951481
ENSG00000100577	0.999357	0.969671	0.980279	0.0506922
ENSG00000100578	0.941717	0.591961	0.946015	0.520307
ENSG00000100580	0.619909	0.380106	0.999998	0.999988
ENSG00000100583	0.999695	0.984975	0.980551	0.0347797
ENSG00000100591	0.979582	0.955592	0.733613	0.331212
ENSG00000100592	0.996447	0.992232	0.693771	0.31755
ENSG00000100596	0.43161	0.666484	0.953877	0.94803
ENSG00000100599	0.999622	0.961009	0.990803	0.0485658
ENSG00000100600	0.947084	0.166111	0.994635	0.89217
ENSG00000100601	0.999746	0.98531	0.983363	0.0315809
ENSG00000100603	0.93974	0.145593	0.99563	0.919037
ENSG00000100605	0.969181	0.719072	0.942534	0.369213
ENSG00000100612	0.998231	0.922644	0.980208	0.098917
ENSG00000100614	0.997228	0.953837	0.949297	0.0996377
ENSG00000100625	0.997015	0.956776	0.94211	0.104099
ENSG00000100629	0.992218	0.340247	0.996229	0.671306
ENSG00000100632	0.990959	0.999071	0.103432	0.906539
ENSG00000100644	0.536113	0.999446	0.465967	0.998474
ENSG00000100647	0.379305	0.6207	0.999999	0.999997
ENSG00000100650	0.385072	0.779886	0.900359	0.934683
ENSG00000100664	0.992933	0.218126	0.998112	0.790829
ENSG00000100697	0.21393	0.985143	0.809756	0.991171
ENSG00000100711	0.669958	0.370191	0.990804	0.969047
ENSG00000100714	0.326413	0.880035	0.847493	0.946058
ENSG00000100722	0.046614	0.984533	0.970333	0.99852
ENSG00000100726	0.833129	0.929803	0.524438	0.71263
ENSG00000100731	0.999815	0.986672	0.98651	0.027003
ENSG00000100739	0.401371	0.641808	0.98071	0.976111
ENSG00000100744	0.982455	0.953631	0.76755	0.296364
ENSG00000100749	0.307249	0.698539	0.997188	0.997024
ENSG00000100764	0.942184	0.997502	0.110838	0.949476
ENSG00000100784	0.995308	0.985707	0.766621	0.252364
ENSG00000100796	0.999722	0.98644	0.980343	0.0334947
ENSG00000100802	0.999233	0.928504	0.99023	0.082032
ENSG00000100804	0.970564	0.99865	0.0804993	0.950287
ENSG00000100811	0.997028	0.978322	0.88798	0.13667
ENSG00000100813	0.000238622	0.999928	0.999834	1
ENSG00000100814	0.972488	0.959222	0.662716	0.405574
ENSG00000100815	0.98914	0.594766	0.986035	0.43006
ENSG00000100823	0.8342	0.996314	0.19782	0.971666
ENSG00000100836	0.999283	0.931625	0.990399	0.0786926
ENSG00000100842	0.518772	0.486845	0.998287	0.996097
ENSG00000100852	0.990229	0.0098641	0.999999	0.999908
ENSG00000100865	0.999426	0.982578	0.969215	0.0487807
ENSG00000100883	0.995022	0.956733	0.909079	0.139167
ENSG00000100888	0.999853	0.987887	0.988172	0.0240876
ENSG00000100889	0.949166	0.985622	0.30975	0.755463
ENSG00000100890	0.993874	0.796878	0.978532	0.230715
ENSG00000100897	0.745284	0.393988	0.970853	0.889874
ENSG00000100902	0.999199	0.990425	0.924124	0.0862518
ENSG00000100906	0.582599	0.99755	0.426859	0.992992
ENSG00000100908	0.997178	0.824801	0.987413	0.190609
ENSG00000100911	0.0427485	0.95754	0.999765	0.999946
ENSG00000100916	0.999817	0.985275	0.987955	0.0269533
ENSG00000100918	0.00224091	0.997776	0.999984	1
ENSG00000100926	0.999914	0.991105	0.990484	0.0184968
ENSG00000100934	0.981996	0.991366	0.366938	0.659699
ENSG00000100938	0.901889	0.79755	0.811188	0.489373
ENSG00000100941	0.985759	0.923512	0.873377	0.217353
ENSG00000100949	0.99817	0.970356	0.946015	0.0854582
ENSG00000100968	0.960689	0.975509	0.46769	0.596112
ENSG00000100979	0.999206	0.980517	0.962469	0.0578078
ENSG00000100982	0.99616	0.960758	0.92033	0.122753
ENSG00000100983	0.998771	0.991085	0.880821	0.129323
ENSG00000100991	0.998733	0.965151	0.967436	0.0686787
ENSG00000100994	0.000540047	0.99946	1	1
ENSG00000100997	0.959426	0.239607	0.991566	0.809401
ENSG00000101000	0.996358	0.994348	0.612736	0.396558
ENSG00000101003	0.000189477	0.999811	1	1
ENSG00000101004	0.997243	0.990094	0.789114	0.223549
ENSG00000101017	0.999267	0.991873	0.917958	0.0909027
ENSG00000101019	0.998811	0.972679	0.960871	0.0676397
ENSG00000101040	0.989287	0.850738	0.949777	0.210198
ENSG00000101052	0.999362	0.979562	0.970918	0.0501585
ENSG00000101057	0.999341	0.976066	0.974411	0.0501816
ENSG00000101079	0.993982	0.368451	0.996599	0.640968
ENSG00000101084	0.986013	0.999996	0.0143359	0.999655
ENSG00000101096	0.999398	0.941367	0.990485	0.0687508
ENSG00000101104	0.708233	0.291784	0.999998	0.999985
ENSG00000101109	0.916537	0.355522	0.97581	0.752131
ENSG00000101126	0.995142	0.759335	0.985854	0.259669
ENSG00000101132	0.999836	0.985516	0.988998	0.0256498
ENSG00000101138	0.948149	0.220382	0.991567	0.839902
ENSG00000101146	0.982038	0.998758	0.0888091	0.930395
ENSG00000101150	0.283148	0.734989	0.990363	0.9915
ENSG00000101152	0.999672	0.981806	0.982785	0.0357374
ENSG00000101158	0.995943	0.992862	0.646025	0.365171
ENSG00000101160	0.981499	0.019167	0.999989	0.999344
ENSG00000101161	0.965604	0.413442	0.982337	0.638617
ENSG00000101166	0.985435	0.955595	0.790372	0.268597
ENSG00000101181	0.999623	0.983771	0.977906	0.0387
ENSG00000101182	0.988824	0.999063	0.0913308	0.920782
ENSG00000101187	0.998831	0.947148	0.980158	0.0738632
ENSG00000101189	0.991401	0.98697	0.628459	0.39317
ENSG00000101190	0.999668	0.98863	0.972133	0.0395692
ENSG00000101191	0.998652	0.980908	0.937434	0.0830061
ENSG00000101193	0.998728	0.97147	0.960074	0.0697277
ENSG00000101194	0.97012	0.0760137	0.998787	0.955079
ENSG00000101199	0.884627	0.392483	0.966484	0.756407
ENSG00000101216	0.999829	0.983768	0.989749	0.0266538
ENSG00000101220	0.970166	0.987721	0.352884	0.689229
ENSG00000101224	0.0414034	0.958597	1	1
ENSG00000101236	0.634254	0.567204	0.932053	0.866489
ENSG00000101246	0.992339	0.609483	0.989068	0.409109
ENSG00000101247	0.999628	0.961786	0.990748	0.0478391
ENSG00000101255	0.994989	0.980995	0.806888	0.217128
ENSG00000101265	0.946821	0.762777	0.892992	0.39741
ENSG00000101266	0.988776	0.674244	0.979996	0.356983
ENSG00000101290	0.958587	0.952835	0.620321	0.468258
ENSG00000101294	0.998517	0.967077	0.960054	0.0743516
ENSG00000101298	0.999881	0.988423	0.989953	0.021743
ENSG00000101307	0.998846	0.979964	0.94827	0.0729205
ENSG00000101310	0.258793	0.877391	0.899063	0.964753
ENSG00000101311	0.983764	0.993974	0.305149	0.717113
ENSG00000101333	0.945095	0.830899	0.841686	0.382319
ENSG00000101335	0.992353	0.813396	0.971046	0.223204
ENSG00000101337	0.999005	0.924497	0.988178	0.0883204
ENSG00000101343	0.999829	0.98412	0.989529	0.0265217
ENSG00000101346	0.482638	0.989385	0.546908	0.981068
ENSG00000101347	0.0786776	0.939039	0.985211	0.997073
ENSG00000101350	0.361141	0.638997	0.999953	0.99991
ENSG00000101353	0.999432	0.964573	0.985009	0.050986
ENSG00000101361	0.982703	0.997373	0.159839	0.860084
ENSG00000101363	0.827515	0.817418	0.74329	0.611778
ENSG00000101365	0.994384	0.79956	0.979734	0.226322
ENSG00000101367	0.999183	0.986487	0.944683	0.0696465
ENSG00000101384	0.985312	0.97655	0.656779	0.38136
ENSG00000101391	0.999186	0.987868	0.938796	0.0741495
ENSG00000101400	0.752991	0.309831	0.988473	0.948704
ENSG00000101407	0.140748	0.989983	0.87335	0.995919
ENSG00000101412	0.000105925	0.999994	0.9999	1
ENSG00000101413	0.4676	0.965032	0.615498	0.951869
ENSG00000101417	0.994527	0.899028	0.957781	0.148665
ENSG00000101421	0.991232	0.126437	0.998847	0.883483
ENSG00000101439	0.855241	0.146833	0.999818	0.998108
ENSG00000101442	0.951894	0.593997	0.951928	0.50218
ENSG00000101444	0.999675	0.976006	0.987068	0.0372508
ENSG00000101447	0.465014	0.534986	1	1
ENSG00000101452	0.989522	0.250911	0.996827	0.76274
ENSG00000101457	0.983337	0.424572	0.989694	0.602396
ENSG00000101460	0.999695	0.979881	0.985486	0.0349388
ENSG00000101464	0.995709	0.963421	0.905622	0.135247
ENSG00000101473	0.965982	0.894154	0.818533	0.321331
ENSG00000101474	0.994911	0.753734	0.985667	0.265688
ENSG00000101493	0.989806	0.958275	0.829389	0.22253
ENSG00000101544	0.559918	0.456422	0.995344	0.988316
ENSG00000101546	0.916637	0.794031	0.832829	0.456503
ENSG00000101557	0.999601	0.990238	0.961253	0.0489078
ENSG00000101558	0.993475	0.985537	0.709037	0.311951
ENSG00000101574	0.568771	0.431911	0.999843	0.999476
ENSG00000101577	0.983469	0.967885	0.704982	0.343664
ENSG00000101596	0.97413	0.277639	0.992385	0.755846
ENSG00000101605	0.978033	0.880663	0.884388	0.256916
ENSG00000101608	0.998679	0.889255	0.98968	0.122386
ENSG00000101624	0.999314	0.986712	0.952319	0.0616551
ENSG00000101639	0.859754	0.916045	0.57773	0.646472
ENSG00000101654	0.997914	0.986672	0.870171	0.145243
ENSG00000101665	0.741893	0.275784	0.996963	0.985361
ENSG00000101680	0.00210865	0.997943	0.99995	0.999999
ENSG00000101745	0.0275276	0.972474	0.999999	1
ENSG00000101751	0.996279	0.965557	0.911712	0.126453
ENSG00000101752	0.900985	0.0999102	0.999945	0.99916
ENSG00000101773	0.00134229	0.998759	0.9999	0.999999
ENSG00000101782	0.997425	0.960547	0.944573	0.0974546
ENSG00000101811	0.996526	0.922383	0.963022	0.118069
ENSG00000101825	0.975404	0.813997	0.921036	0.289563
ENSG00000101843	0.996737	0.758353	0.99021	0.2547
ENSG00000101844	0.99972	0.971378	0.990607	0.0382957
ENSG00000101846	0.837138	0.862206	0.682315	0.618341
ENSG00000101849	0.923353	0.110345	0.997995	0.968306
ENSG00000101856	0.385061	1	0.614939	1
ENSG00000101868	0.360054	0.68184	0.979096	0.97901
ENSG00000101871	0.104015	0.927442	0.974228	0.994315
ENSG00000101882	0.99392	0.365916	0.996604	0.643561
ENSG00000101888	0.888423	0.168434	0.995185	0.947957
ENSG00000101901	0.967613	0.384587	0.984928	0.662872
ENSG00000101911	0.00959643	0.992369	0.998106	0.999928
ENSG00000101928	0.977355	0.541207	0.97883	0.502607
ENSG00000101935	0.767623	0.569575	0.911032	0.75177
ENSG00000101940	0.915684	0.984855	0.271472	0.827989
ENSG00000101945	0.99851	0.930162	0.981265	0.0900628
ENSG00000101955	0.985098	0.995899	0.245343	0.77366
ENSG00000101966	0.988114	0.0119194	1	0.999967
ENSG00000101972	0.762898	0.251575	0.997808	0.987719
ENSG00000101974	0.696779	0.331298	0.994342	0.97758
ENSG00000101986	0.999002	0.944875	0.98363	0.0724926
ENSG00000101997	0.992978	0.939205	0.911453	0.156364
ENSG00000102003	0.996569	0.958197	0.932208	0.113027
ENSG00000102007	0.990753	0.99587	0.327169	0.686208
ENSG00000102024	0.795817	0.884026	0.62935	0.690807
ENSG00000102030	0.997767	0.983514	0.887013	0.131706
ENSG00000102034	0.977136	0.880711	0.880671	0.261482
ENSG00000102038	0.000889241	0.999878	0.999234	0.999999
ENSG00000102053	0.798129	0.959773	0.412998	0.829099
ENSG00000102054	0.999463	0.967544	0.984498	0.0484956
ENSG00000102057	0.987424	0.953325	0.819716	0.239535
ENSG00000102078	0.983479	0.986902	0.484495	0.545124
ENSG00000102081	0.980146	0.0198584	1	0.999996
ENSG00000102096	0.950673	0.0591773	0.999623	0.990527
ENSG00000102098	0.99925	0.920389	0.991432	0.0889298
ENSG00000102100	0.995467	0.887389	0.968279	0.148865
ENSG00000102103	0.9481	0.217717	0.991725	0.842458
ENSG00000102119	0.886544	0.643042	0.899708	0.570706
ENSG00000102125	0.147421	0.88374	0.976544	0.992295
ENSG00000102144	0.992872	0.980944	0.749986	0.276197
ENSG00000102158	0.38165	0.620975	0.998993	0.998381
ENSG00000102172	0.999574	0.988118	0.966089	0.0462192
ENSG00000102174	0.853477	0.954622	0.434755	0.757145
ENSG00000102178	0.690462	0.326338	0.996564	0.986636
ENSG00000102181	0.990683	0.983339	0.669947	0.356031
ENSG00000102189	0.00323374	0.996766	1	1
[truncated: 12,827 more rows]

## Sheet: Results decreased MESOR in old
Filtering criteria: CircaCompare MESOR difference q < 0.05, MESOR difference (old – young) < 0
Ingenuity Canonical Pathways	-log(Enrichment p-value)	Fraction of pathway covered	Molecules
Cell Cycle Control of Chromosomal Replication	11.3	0.926	CDC45,CDC6,CDC7,CDK12,CDK4,CDT1,DNA2,MCM2,MCM3,MCM4,MCM5,MCM6,MCM7,ORC1,ORC5,ORC6,PCNA,POLA1,POLA2,POLD1,PRIM1,PRIM2,RPA1,RPA2,TOP2A
Role of BRCA1 in DNA Damage Response	9.22	0.744	ATR,BARD1,BLM,BRCA1,BRIP1,CHEK1,DPF1,E2F1,E2F2,E2F7,E2F8,FAAP100,FANCA,FANCB,HLTF,MSH2,MSH6,NBN,PLK1,RAD51,RB1,RBBP8,RBL1,RFC1,RFC2,RFC3,RFC4,RFC5,RPA1,SLC19A1,SMARCC1,TOPBP1
NER (Nucleotide Excision Repair, Enhanced Pathway)	9.03	0.812	CHAF1A,CHAF1B,COPS8,DDB2,DNA2,GTF2H3,HMGN1,PCNA,POLA1,POLA2,POLD1,POLD3,POLE2,POLR2B,PRIM1,PRIM2,RFC1,RFC2,RFC3,RFC4,RFC5,RPA1,RPA2,SLC19A1,TOP2A,USP7
Role of CHK Proteins in Cell Cycle Checkpoint Control	7.66	0.793	ATR,BRCA1,CDC25A,CDC25C,CHEK1,CLSPN,E2F1,E2F2,E2F7,E2F8,NBN,PCNA,PLK1,PPP2R2A,PTPA,RFC1,RFC2,RFC3,RFC4,RFC5,RPA1,SLC19A1,TLK2
Mismatch Repair in Eukaryotes	7.05	1	EXO1,FEN1,MSH2,MSH6,PCNA,POLD1,RFC1,RFC2,RFC3,RFC4,RFC5,RPA1,SLC19A1
Kinetochore Metaphase Signaling Pathway	6.32	0.706	BIRC5,BUB1,BUB1B,CCNB1,CDC20,CDC27,CDCA8,CENPA,CENPE,CENPH,CENPP,CENPQ,DSN1,KIF2C,KNL1,MXD3,NDC80,NEK2,NSL1,NUF2,PLK1,PPP1R12A,PTTG1,RAD21
Hereditary Breast Cancer Signaling	5.93	0.6	ATR,BARD1,BLM,BRCA1,CCNB1,CCND3,CDC25C,CDK4,CHEK1,DDB2,DPF1,E2F1,FAAP100,FANCA,FANCB,HLTF,MSH2,MSH6,NBN,NPM1,PALB2,PIK3R4,POLR2B,RAD51,RB1,RFC1,RFC2,RFC3,RFC4,RFC5,RPA1,SLC19A1,SMARCC1
Mitotic Roles of Polo-Like Kinase	3.9	0.667	CCNB1,CCNB2,CDC20,CDC25A,CDC25B,CDC25C,CDC27,CDC7,FBXO5,HSP90AB1,PLK1,PPP2R2A,PRC1,PTPA,PTTG1,RAD21
Cell Cycle: G2/M DNA Damage Checkpoint Regulation	3.81	0.7	ATR,AURKA,BORA,BRCA1,CCNB1,CCNB2,CDC25B,CDC25C,CHEK1,CKS2,CUL1,PLK1,TOP2A,YWHAE
Systemic Lupus Erythematosus Signaling	3.47	0.6	HNRNPA2B1,HNRNPC,JUN,LSM10,LSM11,LSM4,LSM6,LSM8,PIK3R4,PRPF19,PRPF40A,PRPF4B,SNRNP200,SNRNP70,SNRPA,SNRPD3,SNRPG,TXNL4A
Purine Nucleotides De Novo Biosynthesis II	3.25	1	ADSS2,GART,GMPS,IMPDH1,IMPDH2,PPAT
Estrogen-mediated S-phase Entry	2.94	0.714	CCNE2,CDC25A,CDK4,E2F1,E2F2,E2F7,E2F8,RB1,RBL1,TFDP1
ATM Signaling	2.6	0.529	ATR,BLM,BRCA1,CBX3,CCNB1,CCNB2,CDC25A,CDC25C,CHEK1,JUN,NBN,PPP2R2A,PTPA,RAD51,RBBP8,TLK2,TOPBP1,USP7
BER (Base Excision Repair) Pathway	2.55	0.591	E2F1,FEN1,HMGB1,PARP1,PCNA,RFC1,RFC2,RFC3,RFC4,RFC5,RPA1,SLC19A1,UNG
Cyclins and Cell Cycle Regulation	2.42	0.514	ATR,CCNB1,CCNB2,CCND3,CCNE2,CDC25A,CDK4,CDKN2D,CUL1,E2F1,E2F2,E2F7,E2F8,PPP2R2A,PTPA,RB1,RBL1,TFDP1
Sumoylation Pathway	2.4	0.533	JUN,MAP3K5,MYB,NR3C1,PCNA,RFC1,RFC2,RFC3,RFC4,RFC5,RHOBTB2,RPA1,SENP1,SERBP1,SLC19A1,UBA2
Cell Cycle: G1/S Checkpoint Regulation	2.32	0.515	ATR,CCND3,CCNE2,CDC25A,CDK4,CDKN2D,CUL1,E2F1,E2F2,E2F7,E2F8,GNL3,NRG1,PAK1IP1,RB1,RBL1,TFDP1
Cell Cycle Regulation by BTG Family Proteins	2.22	0.643	CCNE2,CDK4,E2F1,E2F2,E2F7,E2F8,PPP2R2A,PTPA,RB1
Methionine Degradation I (to Homocysteine)	2.16	1	FTSJ1,MAT2A,PRMT3,SUV39H2
Granzyme A Signaling	2.13	0.579	F2R,H1-0,H1-10,HMGB2,NDUFA6,NDUFB6,NDUFS1,NDUFS2,PARP1,SET,XRCC6
Cleavage and Polyadenylation of Pre-mRNA	2.05	0.833	CPSF2,CPSF6,NUDT21,PAPOLA,WDR33
DNA Double-Strand Break Repair by Homologous Recombination	2.05	0.833	BRCA1,NBN,POLA1,RAD51,RPA1
Telomere Extension by Telomerase	2.05	0.833	HNRNPA1,HNRNPA2B1,NBN,XRCC5,XRCC6
Spliceosomal Cycle	2.04	0.588	CDC5L,DDX46,DHX38,EIF4A3,PRPF19,SF3A1,SF3A3,SF3B3,SNRNP200,U2AF2
Sirtuin Signaling Pathway	2	0.423	ARG2,ATP5F1D,BAX,E2F1,H1-0,H1-10,JUN,LDHB,NBN,NDUFA6,NDUFB6,NDUFS1,NDUFS2,NEDD4,PARP1,PDHA1,POLR1B,POLR1C,POLR1E,PPARG,PRKAA1,RBBP8,RRP9,SF3A1,TIMM13,TIMM8A,TUBA4A,VDAC1,XRCC5,XRCC6
DNA Methylation and Transcriptional Repression Signaling	1.85	0.5	CDK12,CDK4,E2F1,E2F2,E2F7,E2F8,GATAD2A,MBD2,RB1,RBL1,SAP30,TCF19,TFAM,UHRF1
DNA Double-Strand Break Repair by Non-Homologous End Joining	1.58	0.8	NBN,PARP1,XRCC5,XRCC6
Cysteine Biosynthesis III (mammalia)	1.58	0.8	FTSJ1,MAT2A,PRMT3,SUV39H2
p53 Signaling	1.42	0.452	ATR,BAX,BIRC5,BRCA1,CDK4,CHEK1,E2F1,GNL3,JUN,PCNA,PIK3R4,PMAIP1,RB1,TOPBP1
Aryl Hydrocarbon Receptor Signaling	1.35	0.419	ALDH16A1,ATR,BAX,CCND3,CCNE2,CDK4,CHEK1,DHFR,E2F1,GSTO1,HSP90AB1,JUN,MCM7,NRIP1,POLA1,RB1,RBL1,TFDP1
Role of p14/p19ARF in Tumor Suppression	1.31	0.625	E2F1,NPM1,PIK3R4,RB1,SF3A1
Ribonucleotide Reductase Signaling Pathway	1.15	0.389	ATR,BIRC5,CCNF,CDC25A,CDK4,CHEK1,CUL1,DPF1,E2F1,E2F2,E2F7,E2F8,HLTF,JUN,NFYA,PARP1,PIK3R4,RB1,RRM1,RRM2,SMARCC1
Assembly of RNA Polymerase I Complex	1.13	0.75	POLR1B,POLR1C,POLR1E
Tetrahydrofolate Salvage from 5,10-methenyltetrahydrofolate	1.08	1	GART,MTHFD1
Arginine Degradation VI (Arginase 2 Pathway)	1.08	1	ARG2,PYCR3
5-aminoimidazole Ribonucleotide Biosynthesis I	1.08	1	GART,PPAT
Urate Biosynthesis/Inosine 5'-phosphate Degradation	1.08	1	IMPDH1,IMPDH2
Acetyl-CoA Biosynthesis I (Pyruvate Dehydrogenase Complex)	1.08	1	DLD,PDHA1
Purine Nucleotides Degradation II (Aerobic)	1.08	1	IMPDH1,IMPDH2
dTMP De Novo Biosynthesis	1.08	1	DHFR,TYMS
Senescence Pathway	1.07	0.36	ATR,CBX2,CCNB1,CCNB2,CCND3,CCNE2,CDC25A,CDC25B,CDC25C,CDC27,CDK4,CGAS,CHEK1,DLD,E2F1,E2F2,E2F7,E2F8,EED,JUN,MAPKAPK2,NBN,PARP1,PDHA1,PHF19,PIK3R4,PPP2R2A,PTPA,RB1,RBL1,RPS6KA4
Neuroprotective Role of THOP1 in Alzheimer's Disease	0.955	0.571	NFYA,PRKAR2A,PRSS3,YWHAE
Pyrimidine Deoxyribonucleotides De Novo Biosynthesis I	0.955	0.571	DUT,RRM1,RRM2,TYMS
DNA damage-induced 14-3-3σ Signaling	0.936	0.444	ATR,BRCA1,CCNB1,CCNB2,CCNE2,CDC25C,CHEK1,E2F1
Ovarian Cancer Signaling	0.835	0.372	BRCA1,CDK4,DVL1,E2F1,E2F2,FZD1,MSH2,MSH6,PDGFC,PIK3R4,PRKAR2A,RAD51,RB1,RBL1,TFDP1,VEGFC
Mitochondrial Dysfunction	0.812	0.393	ATP5F1D,CYB5B,GPD2,HSD17B10,NDUFA6,NDUFB6,NDUFS1,NDUFS2,PDHA1,UQCRC1,VDAC1
MicroRNA Biogenesis Signaling Pathway	0.783	0.36	BRCA1,DBR1,EXOSC2,EXOSC9,FUS,HNRNPA1,HNRNPA2B1,HNRNPD,HSP90AB1,NUP153,NUP155,NUP43,NUP54,NUP85,PIK3R4,POLR2B,SF3A1,SRSF3
Superpathway of Methionine Degradation	0.734	0.455	DLD,FTSJ1,MAT2A,PRMT3,SUV39H2
Granzyme B Signaling	0.696	0.667	DFFA,PARP1
γ-glutamyl Cycle	0.696	0.667	CHAC2,GGCT
Tumoricidal Function of Hepatic Natural Killer Cells	0.631	0.5	BAX,DFFA,M6PR
Pyrimidine Ribonucleotides De Novo Biosynthesis	0.631	0.5	CTPS1,DHX29,UMPS
Apelin Pancreas Signaling Pathway	0.631	0.5	PIK3R4,PRKAA1,PRKAR2A
CSDE1 Signaling Pathway	0.618	0.389	BCYRN1,CCND3,FUS,HNRNPC,HNRNPD,PTBP1,SYNCRIP
Nucleotide Excision Repair Pathway	0.613	0.444	GTF2H3,POLR2B,RPA1,RPA2
Salvage Pathways of Pyrimidine Ribonucleotides	0.546	0.364	CDK4,IRAK1,NEK2,PLK1,PRKAA1,PRPF4B,PYCR3,UCK2
RAN Signaling	0.54	1	KPNA2
Arsenate Detoxification I (Glutaredoxin)	0.54	1	GSTO1
Proline Biosynthesis II (from Arginine)	0.54	1	PYCR3
Pyruvate Fermentation to Lactate	0.54	1	LDHB
2-ketoglutarate Dehydrogenase Complex	0.54	1	DLD
PRPP Biosynthesis I	0.54	1	PRPS2
Sucrose Degradation V (Mammalian)	0.54	1	TPI1
Branched-chain α-keto acid Dehydrogenase Complex	0.54	1	DLD
Guanine and Guanosine Salvage I	0.54	1	HPRT1
Spermine Biosynthesis	0.54	1	AMD1
Histidine Degradation III	0.54	1	MTHFD1
S-methyl-5'-thioadenosine Degradation II	0.54	1	MTAP
S-methyl-5-thio-α-D-ribose 1-phosphate Degradation	0.54	1	MRI1
Glycerol Degradation I	0.54	1	GPD2
Glycine Cleavage Complex	0.54	1	DLD
Ascorbate Recycling (Cytosolic)	0.54	1	GSTO1
UDP-N-acetyl-D-glucosamine Biosynthesis II	0.54	1	UAP1
Adenine and Adenosine Salvage III	0.54	1	HPRT1
Uridine-5'-phosphate Biosynthesis	0.54	1	UMPS
Hypusine Biosynthesis	0.54	1	DOHH
Spermidine Biosynthesis I	0.54	1	AMD1
Proline Biosynthesis I	0.54	1	PYCR3
Glycerol-3-phosphate Shuttle	0.54	1	GPD2
Galactose Degradation I (Leloir Pathway)	0.54	1	GALE
Folate Polyglutamylation	0.54	1	MTHFD1
S-adenosyl-L-methionine Biosynthesis	0.54	1	MAT2A
UDP-N-acetyl-D-galactosamine Biosynthesis I	0.54	1	GALE
Glioma Signaling	0.535	0.343	CCND3,CDK4,CDKN2D,E2F1,E2F2,E2F7,E2F8,PDGFC,PIK3R4,RB1,RBL1,TFDP1
Assembly of RNA Polymerase II Complex	0.496	0.4	GTF2H3,POLR2B,TAF15,TAF6L
Sonic Hedgehog Signaling	0.487	0.429	CCNB1,CCNB2,PRKAR2A
Apelin Muscle Signaling Pathway	0.487	0.429	NRF1,PRKAA1,TFAM
Isoleucine Degradation I	0.485	0.5	DLD,HSD17B10
UDP-N-acetyl-D-galactosamine Biosynthesis II	0.485	0.5	GALE,UAP1
GADD45 Signaling	0.476	0.348	ATR,BRCA1,CCNB1,CCND3,CCNE2,CDK4,NFYA,PCNA
Oxidative Phosphorylation	0.46	0.35	ATP5F1D,CYB5B,NDUFA6,NDUFB6,NDUFS1,NDUFS2,UQCRC1
Small Cell Lung Cancer Signaling	0.449	0.333	CCND3,CCNE2,CDK4,E2F1,E2F2,PIK3R4,RB1,RBL1,TFDP1,TRAF3
Role Of Chondrocytes In Rheumatoid Arthritis Signaling Pathway	0.432	0.333	CEBPZ,IL1RAP,IRAK1,JUN,MLKL,MMP1,PDGFC,PRKAA1,VEGFC
Pancreatic Adenocarcinoma Signaling	0.431	0.319	BIRC5,CCNE2,CDK4,E2F1,E2F2,E2F7,E2F8,PDGFC,PIK3R4,RAD51,RALBP1,RB1,RBL1,TFDP1,VEGFC
Xenobiotic Metabolism AHR Signaling Pathway	0.423	0.357	ALDH16A1,GSTO1,HSP90AB1,NRIP1,SENP1
eNOS Signaling	0.415	0.333	CHRNA5,HSP90AB1,HSPA14,PDGFC,PIK3R4,PRKAA1,PRKAR2A,VEGFC
Role of PKR in Interferon Induction and Antiviral Response	0.414	0.324	BAX,E2F1,EIF2S1,HMGB1,HSP90AB1,HSPA14,JUN,METAP2,NPM1,PDGFC,TRAF3
Glioblastoma Multiforme Signaling	0.385	0.316	CCND3,CCNE2,CDK4,E2F1,E2F2,E2F7,E2F8,FZD1,PDGFC,PIK3R4,RB1,RHOBTB2
Inhibition of ARE-Mediated mRNA Degradation Pathway	0.385	0.316	EXOSC2,EXOSC9,MAPKAPK2,PAPOLA,PPP2R2A,PRKAR2A,PSMC6,PSMD12,PSME4,PTPA,YWHAE,ZFP36L2
Protein Ubiquitination Pathway	0.361	0.305	BAP1,BRCA1,CDC20,CUL1,HSP90AB1,HSPA12A,HSPA14,NEDD4,PSMC6,PSMD12,UBE2C,UBE2G2,UBE2J2,USP1,USP13,USP16,USP37,USP7
Non-Small Cell Lung Cancer Signaling	0.361	0.32	CCND3,CDK4,E2F1,E2F2,PIK3R4,RB1,RBL1,TFDP1
IL-7 Signaling Pathway	0.353	0.333	BAX,CCND3,CDC25A,JUN,PIK3R4
Pyrimidine Ribonucleotides Interconversion	0.349	0.4	CTPS1,DHX29
Coronavirus Pathogenesis Pathway	0.348	0.304	BAX,CCNE2,CDK4,E2F1,E2F2,E2F7,E2F8,JUN,NPM1,PTGES2,RB1,RBL1,RN7SL1,RPS15A,RPS2,TFDP1,TRAF3
Tight Junction Signaling	0.344	0.308	CDK4,CPSF2,CPSF6,JUN,NECTIN1,NECTIN3,NUDT21,PALS1,PPP2R2A,PRKAR2A,PTPA,SAFB
Estrogen Receptor Signaling	0.332	0.298	ARG2,ATP5F1D,CCNC,EIF2B3,HNRNPD,HSP90AB1,JUN,MMP1,NDUFA6,NDUFB6,NDUFS1,NDUFS2,NR3C1,NRF1,NRIP1,PCNA,PDGFC,PIK3R4,POLR2B,PPP1R12A,PRKAA1,PRKAR2A,TFAM,THRAP3,VEGFC
NAD Signaling Pathway	0.332	0.31	H1-0,H1-10,LDHB,NADK,PARP1,PIK3R4,POLR2B,POLRMT,PRKAA1
Bladder Cancer Signaling	0.332	0.31	CDK4,E2F1,E2F2,MMP1,PDGFC,RB1,RBL1,TFDP1,VEGFC
p38 MAPK Signaling	0.332	0.31	CDC25B,HMGN1,IL1RAP,IRAK1,IRAK2,MAP3K5,MAPKAPK2,RPS6KA4,TIFA
Melanoma Signaling	0.327	0.333	CDK4,E2F1,PIK3R4,RB1
Triacylglycerol Biosynthesis	0.327	0.333	ABHD5,AGPAT5,LPCAT1,OSGEPL1
Pyridoxal 5'-phosphate Salvage Pathway	0.318	0.316	CDK4,IRAK1,NEK2,PLK1,PRKAA1,PRPF4B
Hematopoiesis from Multipotent Stem Cells	0.307	0.5	KITLG
Prostanoid Biosynthesis	0.307	0.5	PTGES2
Urea Cycle	0.307	0.5	ARG2
Heme Degradation	0.307	0.5	HMOX2
Citrulline Biosynthesis	0.307	0.5	ARG2
Selenocysteine Biosynthesis II (Archaea and Eukaryotes)	0.307	0.5	SEPHS1
Valine Degradation I	0.307	0.5	DLD
Colanic Acid Building Blocks Biosynthesis	0.307	0.5	GALE
Glycoaminoglycan-protein Linkage Region Biosynthesis	0.307	0.5	XYLT2
Arginine Degradation I (Arginase Pathway)	0.307	0.5	ARG2
Molybdenum Cofactor Biosynthesis	0.307	0.5	MOCS2
Folate Transformations I	0.307	0.5	MTHFD1
Th17 Activation Pathway	0.296	0.333	HSP90AB1,IRAK1,IRAK2
Role of OCT4 in Mammalian Embryonic Stem Cell Pluripotency	0.294	0.312	BRCA1,CCNF,NR2F6,PARP1,RB1
Sphingosine-1-phosphate Signaling	0.294	0.312	PDGFC,PIK3R4,RHOBTB2,S1PR1,SPHK1
Hypoxia Signaling in the Cardiovascular System	0.294	0.312	HSP90AB1,JUN,UBE2C,UBE2G2,UBE2J2
mTOR Signaling	0.288	0.295	DGKZ,EIF3A,EIF4A3,PDGFC,PIK3R4,PPP2R2A,PRKAA1,PTPA,RHOBTB2,RPS15A,RPS2,RPS6KA4,VEGFC
Chronic Myeloid Leukemia Signaling	0.272	0.294	CCND3,CDK4,E2F1,E2F2,E2F7,E2F8,PIK3R4,RB1,RBL1,TFDP1
Regulation of eIF4 and p70S6K Signaling	0.272	0.294	EIF1AX,EIF2B3,EIF2S1,EIF3A,EIF4A3,PIK3R4,PPP2R2A,PTPA,RPS15A,RPS2
Immunogenic Cell Death Signaling Pathway	0.269	0.3	BAX,CGAS,HMGB1,HSP90AB1,HSPA14,MLKL
Role of JAK2 in Hormone-like Cytokine Signaling	0.266	0.308	CCND3,HLTF,PDGFC,VEGFC
Dopamine Receptor Signaling	0.266	0.308	PPP1R12A,PPP2R2A,PRKAR2A,PTPA
PXR/RXR Activation	0.256	0.333	NR3C1,PRKAR2A
Assembly of RNA Polymerase III Complex	0.256	0.333	GTF3A,SF3A1
Transcriptional Regulatory Network in Embryonic Stem Cells	0.256	0.333	RIF1,SET
Chondroitin Sulfate Degradation (Metazoa)	0.256	0.333	CEMIP2,HYAL2
Dermatan Sulfate Biosynthesis (Late Stages)	0.256	0.333	DSEL,HS3ST5
Dermatan Sulfate Degradation (Metazoa)	0.256	0.333	CEMIP2,HYAL2
Fatty Acid β-oxidation I	0.256	0.333	ACSL4,HSD17B10
Nitric Oxide Signaling in the Cardiovascular System	0.25	0.292	ARG2,HSP90AB1,PDGFC,PIK3R4,PRKAA1,PRKAR2A,VEGFC
Xenobiotic Metabolism PXR Signaling Pathway	0.25	0.292	ALDH16A1,GSTO1,HS3ST5,HSP90AB1,NRIP1,PPP1R12A,PRKAR2A
IL-1 Signaling	0.244	0.294	IL1RAP,IRAK1,IRAK2,JUN,PRKAR2A
Role of JAK family kinases in IL-6-type Cytokine Signaling	0.244	0.294	BIRC5,HSP90AB1,MMP1,PDGFC,VEGFC
HIPPO signaling	0.244	0.294	CUL1,PPP1R12A,PPP2R2A,PTPA,YWHAE
BEX2 Signaling Pathway	0.244	0.294	JUN,PDGFC,PPP2R2A,PTPA,VEGFC
CDP-diacylglycerol Biosynthesis I	0.233	0.3	ABHD5,AGPAT5,LPCAT1
Phosphatidylglycerol Biosynthesis II (Non-plastidic)	0.233	0.3	ABHD5,AGPAT5,LPCAT1
Superpathway of Citrulline Metabolism	0.194	0.333	ARG2
Acyl-CoA Hydrolysis	0.194	0.333	PPT1
NAD Phosphorylation and Dephosphorylation	0.194	0.333	NADK
Glycogen Degradation II	0.194	0.333	MTAP
Glycolysis I	0.194	0.333	TPI1
Phototransduction Pathway	0.194	0.333	PRKAR2A
Dilated Cardiomyopathy Signaling Pathway	0	0.158	BAX,ILK,PRKAR2A
Neurovascular Coupling Signaling Pathway	0	0.121	KCNN2,PPP1R12A,PRKAR2A,SLC16A1
Oxytocin In Brain Signaling Pathway	0	0.0645	CAMKK1,PIK3R4
Oxytocin Signaling Pathway	0	0.14	CAMKK1,MFN2,PIK3R4,PPARG,PPP1R12A,PRKAA1,PRKAR2A
Pulmonary Fibrosis Idiopathic Signaling Pathway	0	0.195	BAX,BIRC5,COL5A3,COL7A1,EED,F2R,FZD1,ILK,JUN,MMP1,PDGFC,PIK3R4,PMAIP1,RPS6KA4,SUZ12,TERT
Pulmonary Healing Signaling Pathway	0	0.175	CCNB1,CDC25C,FZD1,MMP1,PDGFC,PRKAA1,VEGFC
Pyroptosis Signaling Pathway	0	0.222	BAX,HMGB1,PRKAR2A,TRAF3
Wound Healing Signaling Pathway	0	0.163	COL5A3,COL7A1,IL1RAP,JUN,MMP1,PDGFC,VEGFC
CLEAR Signaling Pathway	0	0.0893	M6PR,PPP2R2A,PRKAA1,PTPA,YWHAE
ID1 Signaling Pathway	0	0.271	ATAD5,AURKA,BAX,BIRC5,CDC20,CDK4,CHRNA5,E2F1,PDGFC,PIK3R4,TYMS,USP1,VEGFC
IL-13 Signaling Pathway	0	0.105	JUN,PIK3R4
Oxytocin In Spinal Neurons Signaling Pathway	0	0.143	CAMKK1
SNARE Signaling Pathway	0	0.167	PRKAR2A,SGTA
CDX Gastrointestinal Cancer Signaling Pathway	0	0.148	BLM,FZD1,JUN,PIK3R4
Macrophage Classical Activation Signaling Pathway	0	0.25	DLD,EED,IRAK1,NDUFS1,PDHA1,PPARG,SUZ12
Multiple Sclerosis Signaling Pathway	0	0.167	BAX,EED,PARP1,PPARG,SUZ12
Pathogen Induced Cytokine Storm Signaling Pathway	0	0.2	CGAS,COL5A3,COL7A1,IL1RAP,JUN,MLKL,PDGFC,VEGFC
Role Of Osteoblasts In Rheumatoid Arthritis Signaling Pathway	0	0.146	DVL1,FZD1,MMP1,PDGFC,PIK3R4,VEGFC
Role Of Osteoclasts In Rheumatoid Arthritis Signaling Pathway	0	0.14	COL5A3,COL7A1,IL1RAP,JUN,MAP3K5,MMP1,PIK3R4,RHOBTB2
Glucocorticoid Receptor Signaling	0	0.275	ARG2,ATP5F1D,BRCA1,DPF1,GTF2F2,GTF2H3,HLTF,HMGB1,HSP90AB1,HSPA14,JUN,MMP1,NDUFA6,NDUFB6,NDUFS1,NDUFS2,NR3C1,NRIP1,PIK3R4,POLR2B,PPARG,PRKAA1,SMARCC1,TAF15,TAF6L,TFAM,TFB1M,TFB2M
Natural Killer Cell Signaling	0	0.138	COL5A3,HSPA14,MAP3K5,PIK3R4
IL-10 Signaling	0	0.185	ARG2,CDKN2D,IL1RAP,JUN,PRKAA1
Macrophage Alternative Activation Signaling Pathway	0	0.179	JUN,NR3C1,PIK3R4,PPARG,RPS6KA4
Neutrophil Extracellular Trap Signaling Pathway	0	0.2	ARG2,ATP5F1D,COL5A3,COL7A1,HMGB1,MLKL,NDUFA6,NDUFB6,NDUFS1,NDUFS2,PIK3R4,TIMM13,TIMM8A,VDAC1
S100 Family Signaling Pathway	0	0.167	ATP5F1D,F2R,F2RL1,FZD1,GPR3,ILK,IRAK1,IRAK2,JUN,MMP1,NCL,NR3C1,PDGFC,PIK3R4,PRKAR2A,S1PR1,TRAF3,VEGFC
Neuregulin Signaling	0	0.08	HSP90AB1,NRG1
Circadian Rhythm Signaling	0	0.087	CIART,NR3C1,PRKAA1,PRKAR2A
Leukocyte Extravasation Signaling	0	0.0882	MMP1,PIK3R4,SIPA1
Synaptic Long Term Potentiation	0	0.087	PPP1R12A,PRKAR2A
Axonal Guidance Signaling	0	0.123	ACTR2,AFG3L2,FZD1,MMP1,PDGFC,PIK3R4,PMPCA,PRKAR2A,TUBA4A,VEGFC
Amyotrophic Lateral Sclerosis Signaling	0	0.222	BAX,PDGFC,PIK3R4,VEGFC
Fc Epsilon RI Signaling	0	0.05	PIK3R4
Actin Cytoskeleton Signaling	0	0.205	ACTR2,F2R,IQGAP3,NCKAP1,PDGFC,PIK3R4,PPP1R12A,TLN2
Synaptic Long Term Depression	0	0.069	PPP2R2A,PTPA
Huntington's Disease Signaling	0	0.145	ATP5F1D,BAX,HSPA14,JUN,PIK3R4,POLR2B,PSMC6,PSMD12,PSME4
NRF2-mediated Oxidative Stress Response	0	0.182	CLPP,DNAJA3,GSTO1,HACD3,HSP90AB1,JUN,MAP3K5,PIK3R4
PPARα/RXRα Activation	0	0.216	CKAP5,GPD2,HSP90AB1,IL1RAP,JUN,PRKAA1,PRKAR2A,TGS1
LPS/IL-1 Mediated Inhibition of RXR Function	0	0.219	ACSL4,ALDH16A1,GSTO1,HS3ST5,IL1RAP,IRAK1,JUN
Coagulation System	0	0.25	F2R
Acute Phase Response Signaling	0	0.267	HMOX2,HNRNPK,IL1RAP,IRAK1,JUN,MAP3K5,NOLC1,NR3C1
Hepatic Cholestasis	0	0.208	IL1RAP,IRAK1,IRAK2,JUN,PRKAR2A
LXR/RXR Activation	0	0.1	ARG2,IL1RAP
Hepatic Fibrosis / Hepatic Stellate Cell Activation	0	0.175	BAX,COL5A3,COL7A1,IL1RAP,MMP1,PDGFC,VEGFC
VDR/RXR Activation	0	0.0833	CCNC
FXR/RXR Activation	0	0.143	PPARG,SDC1
Ceramide Signaling	0	0.286	JUN,PIK3R4,PPP2R2A,PTPA,S1PR1,SPHK1
TR/RXR Activation	0	0.0588	PIK3R4
Regulation of Actin-based Motility by Rho	0	0.167	ACTR2,PPP1R12A,RHOBTB2
RAR Activation	0	0.286	DPF1,GTF2H3,HLTF,JUN,MAP3K5,MAPKAPK2,MMP1,NR2F6,NRIP1,PARP1,PRKAR2A,SMARCC1
Erythropoietin Signaling Pathway	0	0.0741	JUN,PIK3R4
14-3-3-mediated Signaling	0	0.273	BAX,JUN,MAP3K5,PIK3R4,TUBA4A,YWHAE
α-Adrenergic Signaling	0	0.0625	PRKAR2A
Activation of IRF by Cytosolic Pattern Recognition Receptors	0	0.143	JUN,TRAF3
Clathrin-mediated Endocytosis Signaling	0	0.175	ACTR2,AP1S1,F2R,PDGFC,PIK3R4,SH3GL1,VEGFC
Fcγ Receptor-mediated Phagocytosis in Macrophages and Monocytes	0	0.087	ACTR2,TLN2
IL-8 Signaling	0	0.2	BAX,CCND3,IRAK1,IRAK2,JUN,PDGFC,PIK3R4,RHOBTB2,VEGFC
IL-12 Signaling and Production in Macrophages	0	0.136	JUN,PIK3R4,PPARG
Role of RIG1-like Receptors in Antiviral Innate Immunity	0	0.125	TRAF3
Role of Pattern Recognition Receptors in Recognition of Bacteria and Viruses	0	0.143	EIF2S1,PIK3R4,RIPK2
TREM1 Signaling	0	0.167	IRAK1
MIF Regulation of Innate Immunity	0	0.1	JUN
Role of NFAT in Regulation of the Immune Response	0	0.125	JUN,KPNA2,PIK3R4
FcγRIIB Signaling in B Lymphocytes	0	0.125	PIK3R4
LPS-stimulated MAPK Signaling	0	0.15	JUN,MAP3K5,PIK3R4
NF-κB Activation by Viruses	0	0.0833	PIK3R4
CCR5 Signaling in Macrophages	0	0.0667	JUN
CD40 Signaling	0	0.267	JUN,MAPKAPK2,PIK3R4,TRAF3
Cytotoxic T Lymphocyte-mediated Apoptosis of Target Cells	0	0.167	DFFA
CD27 Signaling in Lymphocytes	0	0.167	JUN,MAP3K5
IL-3 Signaling	0	0.105	JUN,PIK3R4
Lymphotoxin β Receptor Signaling	0	0.182	PIK3R4,TRAF3
IL-17 Signaling	0	0.208	HSP90AB1,JUN,PDGFC,PIK3R4,VEGFC
Airway Pathology in Chronic Obstructive Pulmonary Disease	0	0.1	MMP1
fMLP Signaling in Neutrophils	0	0.0909	ACTR2,PIK3R4
CXCR4 Signaling	0	0.12	JUN,PIK3R4,RHOBTB2
4-1BB Signaling in T Lymphocytes	0	0.222	JUN,MAP3K5
Thrombopoietin Signaling	0	0.133	JUN,PIK3R4
CTLA4 Signaling in Cytotoxic T Lymphocytes	0	0.143	AP1S1,JUN,PIK3R4,PPP2R2A,PTPA
Induction of Apoptosis by HIV1	0	0.267	BAX,DFFA,MAP3K5,SLC25A13
B Cell Activating Factor Signaling	0	0.222	JUN,TRAF3
IL-15 Production	0	0.0556	TYRO3
IL-9 Signaling	0	0.167	PIK3R4
CCR3 Signaling in Eosinophils	0	0.0769	PIK3R4,PPP1R12A
Oncostatin M Signaling	0	0.125	MMP1
CD28 Signaling in T Helper Cells	0	0.158	ACTR2,JUN,PIK3R4
IL-15 Signaling	0	0.0667	PIK3R4
Virus Entry via Endocytic Pathways	0	0.0833	AP1S1,PIK3R4
Dendritic Cell Maturation	0	0.12	COL5A3,FSCN1,PIK3R4
Mechanisms of Viral Exit from Host Cells	0	0.25	NEDD4,SH3GL1
Reelin Signaling in Neurons	0	0.0968	ACTR2,NECTIN3,PIK3R4
HIF1α Signaling	0	0.167	HSPA14,JUN,LDHB,MMP1,PDGFC,PIK3R4,VEGFC
Melatonin Signaling	0	0.0714	PRKAR2A
Angiopoietin Signaling	0	0.167	BIRC5,PIK3R4
Cellular Effects of Sildenafil (Viagra)	0	0.2	KCNN2,PPP1R12A,PRKAR2A
Neuropathic Pain Signaling In Dorsal Horn Neurons	0	0.214	KCNN2,PIK3R4,PRKAR2A
Endothelin-1 Signaling	0	0.0625	JUN,PIK3R4
Relaxin Signaling	0	0.19	JUN,PDE7A,PIK3R4,PRKAR2A
Factors Promoting Cardiogenesis in Vertebrates	0	0.0667	DVL1,FZD1
CNTF Signaling	0	0.182	PIK3R4,RPS6KA4
Agrin Interactions at Neuromuscular Junction	0	0.214	DVL1,JUN,NRG1
Renin-Angiotensin Signaling	0	0.15	JUN,PIK3R4,PRKAR2A
Docosahexaenoic Acid (DHA) Signaling	0	0.286	BAX,PIK3R4
Semaphorin Signaling in Neurons	0	0.0909	RHOBTB2
Thrombin Signaling	0	0.111	F2R,PIK3R4,PPP1R12A,RHOBTB2
Cardiac Hypertrophy Signaling	0	0.211	ADSS2,EIF2B3,JUN,MAP3K5,MAPKAPK2,PIK3R4,PRKAR2A,RHOBTB2
CDK5 Signaling	0	0.222	PPP1R12A,PPP2R2A,PRKAR2A,PTPA
ICOS-ICOSL Signaling in T Helper Cells	0	0.0625	PIK3R4
Molecular Mechanisms of Cancer	0	0.287	ATR,AURKA,BAX,BRCA1,CCND3,CCNE2,CDC25A,CDC25B,CDC25C,CDK12,CDK4,CDKN2D,CHEK1,DVL1,E2F1,E2F2,E2F7,E2F8,FZD1,HAT1,JUN,MAP3K5,NBN,PIK3R4,PMAIP1,PRKAR2A,RALBP1,RB1,RBL1,RHOBTB2,TFDP1
Corticotropin Releasing Hormone Signaling	0	0.0909	JUN,PRKAR2A
HGF Signaling	0	0.103	JUN,MAP3K5,PIK3R4
HMGB1 Signaling	0	0.192	HAT1,HMGB1,JUN,PIK3R4,RHOBTB2
FLT3 Signaling in Hematopoietic Progenitor Cells	0	0.1	PIK3R4,RPS6KA4
Polyamine Regulation in Colon Cancer	0	0.188	DOHH,JUN,PPARG
GNRH Signaling	0	0.1	JUN,MAP3K5,PRKAR2A
Cholecystokinin/Gastrin-mediated Signaling	0	0.087	JUN,RHOBTB2
Human Embryonic Stem Cell Pluripotency	0	0.233	DVL1,FZD1,HSP90AB1,KLF2,NFYA,PDGFC,PIK3R4,RIF1,SPHK1,TERT
Melanocyte Development and Pigmentation Signaling	0	0.19	KITLG,PIK3R4,PRKAR2A,RPS6KA4
Antiproliferative Role of Somatostatin Receptor 2	0	0.0769	PIK3R4
Androgen Signaling	0	0.241	GTF2F2,GTF2H3,JUN,POLR2B,PRKAR2A,TAF15,TAF6L
Germ Cell-Sertoli Cell Junction Signaling	0	0.194	ILK,MAP3K5,NECTIN3,PIK3R4,RHOBTB2,TUBA4A
Aldosterone Signaling in Epithelial Cells	0	0.156	HSP90AB1,HSPA12A,HSPA14,NEDD4,PIK3R4
Role of NANOG in Mammalian Embryonic Stem Cell Pluripotency	0	0.19	DVL1,FZD1,PIK3R4,RIF1
Growth Hormone Signaling	0	0.125	PIK3R4,RPS6KA4
Prolactin Signaling	0	0.143	JUN,NR3C1,PIK3R4
CREB Signaling in Neurons	0	0.121	F2R,F2RL1,FZD1,GPR3,PIK3R4,POLR2B,PRKAR2A,S1PR1
Prostate Cancer Signaling	0	0.242	CCNE2,E2F1,E2F2,HSP90AB1,PIK3R4,RB1,RBL1,TFDP1
Renal Cell Carcinoma Signaling	0	0.111	JUN,PIK3R4
Type I Diabetes Mellitus Signaling	0	0.143	IL1RAP,IRAK1,MAP3K5
Endometrial Cancer Signaling	0	0.154	ILK,PIK3R4
Basal Cell Carcinoma Signaling	0	0.133	DVL1,FZD1
Primary Immunodeficiency Signaling	0	0.2	UNG
Acute Myeloid Leukemia Signaling	0	0.133	KITLG,PIK3R4
Thyroid Cancer Signaling	0	0.154	JUN,PIK3R4
Type II Diabetes Mellitus Signaling	0	0.185	ACSL4,MAP3K5,PIK3R4,PPARG,PRKAA1
Production of Nitric Oxide and Reactive Oxygen Species in Macrophages	0	0.205	ARG2,JUN,MAP3K5,PIK3R4,PPP1R12A,PPP2R2A,PTPA,RHOBTB2
Gα12/13 Signaling	0	0.261	CDH11,F2R,F2RL1,JUN,MAP3K5,PIK3R4
p70S6K Signaling	0	0.231	F2R,F2RL1,PIK3R4,PPP2R2A,PTPA,YWHAE
ERK5 Signaling	0	0.111	RPS6KA4,YWHAE
Colorectal Cancer Metastasis Signaling	0	0.26	BAX,BIRC5,DVL1,FZD1,JUN,MMP1,MSH2,MSH6,PDGFC,PIK3R4,PRKAR2A,RHOBTB2,VEGFC
MYC Mediated Apoptosis Signaling	0	0.25	BAX,PMAIP1,PRKAR2A
G Beta Gamma Signaling	0	0.1	CAV2,PRKAR2A
Crosstalk between Dendritic Cells and Natural Killer Cells	0	0.222	FSCN1,TLN2
CDC42 Signaling	0	0.167	ACTR2,IQGAP3,JUN,PPP1R12A
ILK Signaling	0	0.278	ILK,JUN,PDGFC,PIK3R4,PPP1R12A,PPP2R2A,PTPA,RHOBTB2,RPS6KA4,VEGFC
FAK Signaling	0	0.125	ACTR2,COL5A3,F2R,F2RL1,FZD1,GPR3,JUN,PIK3R4,S1PR1,SH3GL1
EIF2 Signaling	0	0.286	EIF1AX,EIF2B3,EIF2S1,EIF3A,EIF4A3,EIF5B,HNRNPA1,PIK3R4,PTBP1,RPL7L1,RPS15A,RPS2
April Mediated Signaling	0	0.222	JUN,TRAF3
Retinoic acid Mediated Apoptosis Signaling	0	0.125	PARP1
AMPK Signaling	0	0.231	CHRNA5,DPF1,HLTF,PHLPP1,PIK3R4,PPAT,PPM1F,PPP2R2A,PRKAA1,PRKAR2A,PTPA,SMARCC1
PAK Signaling	0	0.167	PAK1IP1,PDGFC,PIK3R4
RAC Signaling	0	0.172	ACTR2,IQGAP3,JUN,NCKAP1,PIK3R4
RHOA Signaling	0	0.192	ACTR2,CIT,NEDD4,PPP1R12A,SEPTIN8
Role of Osteoblasts, Osteoclasts and Chondrocytes in Rheumatoid Arthritis	0	0.156	DVL1,FZD1,IL1RAP,JUN,MAP3K5,MMP1,PIK3R4
Phospholipase C Signaling	0	0.0426	PPP1R12A,RHOBTB2
HER-2 Signaling in Breast Cancer	0	0.277	BIRC5,CCNE2,CDK4,JUN,NRG1,NUP153,NUP155,NUP43,NUP54,NUP85,PIK3R4,RB1,RBL1
Altered T Cell and B Cell Signaling in Rheumatoid Arthritis	0	0.167	TRAF3
Atherosclerosis Signaling	0	0.12	COL5A3,MMP1,PDGFC
Protein Kinase A Signaling	0	0.194	AKAP1,CDC25A,CDC25B,CDC25C,CDC27,CDKN3,DUSP7,H1-0,H1-10,PDE7A,PPP1R12A,PRKAR2A,YWHAE
Role of Macrophages, Fibroblasts and Endothelial Cells in Rheumatoid Arthritis	0	0.221	CEBPZ,DVL1,F2RL1,FZD1,IL1RAP,IRAK1,IRAK2,JUN,MAPKAPK2,MMP1,PDGFC,PIK3R4,PRSS3,TRAF3,VEGFC
Estrogen-Dependent Breast Cancer Signaling	0	0.211	HSD17B10,JUN,PIK3R4,TERT
Leptin Signaling in Obesity	0	0.222	PIK3R4,PRKAR2A
Role of NFAT in Cardiac Hypertrophy	0	0.0556	PIK3R4,PRKAR2A
Glioma Invasiveness Signaling	0	0.231	F2R,PIK3R4,RHOBTB2
Breast Cancer Regulation by Stathmin1	0	0.259	AURKA,CCND3,CDK4,E2F1,E2F2,E2F7,E2F8,F2R,F2RL1,FZD1,GPR3,JUN,PDGFC,PIK3R4,PPP1R12A,PPP2R2A,PRKAR2A,PTPA,S1PR1,TUBA4A,VEGFC
RANK Signaling in Osteoclasts	0	0.176	JUN,MAP3K5,PIK3R4
Regulation of IL-2 Expression in Activated and Anergic T Lymphocytes	0	0.0435	JUN
Role of WNT/GSK-3β Signaling in the Pathogenesis of Influenza	0	0.2	DVL1,FZD1
TWEAK Signaling	0	0.2	TRAF3
NUR77 Signaling in T Lymphocytes	0	0.0526	PCNA
PKCθ Signaling in T Lymphocytes	0	0.15	JUN,MAP3K5,PIK3R4
TNFR1 Signaling	0	0.143	JUN
Role of MAPK Signaling in the Pathogenesis of Influenza	0	0.0952	BAX,MAP3K5
TNFR2 Signaling	0	0.25	JUN
Role of PI3K/AKT Signaling in the Pathogenesis of Influenza	0	0.111	PIK3R4
Role of Hypercytokinemia/hyperchemokinemia in the Pathogenesis of Influenza	0	0.0909	S1PR1
Antiproliferative Role of TOB in T Cell Signaling	0	0.176	CCNE2,CUL1,RB1
MSP-RON Signaling Pathway	0	0.25	PIK3R4
OX40 Signaling Pathway	0	0.2	JUN,TRAF3
PI3K Signaling in B Lymphocytes	0	0.0385	JUN
Inhibition of Angiogenesis by TSP1	0	0.182	JUN,SDC1
MIF-mediated Glucocorticoid Regulation	0	0.125	NR3C1
P2Y Purigenic Receptor Signaling Pathway	0	0.15	JUN,PIK3R4,PRKAR2A
Intrinsic Prothrombin Activation Pathway	0	0.25	COL5A3
Role of Tissue Factor in Cancer	0	0.167	F2RL1,MMP1,PIK3R4,RPS6KA4,VEGFC
IL-17A Signaling in Airway Cells	0	0.1	PIK3R4
Role of IL-17A in Arthritis	0	0.214	MAPKAPK2,MMP1,PIK3R4
IL-17A Signaling in Fibroblasts	0	0.222	JUN,MMP1
IL-17A Signaling in Gastric Cells	0	0.167	JUN
Role of IL-17F in Allergic Inflammatory Airway Diseases	0	0.1	RPS6KA4
Role of JAK1 and JAK3 in γc Cytokine Signaling	0	0.1	PIK3R4
Actin Nucleation by ARP-WASP Complex	0	0.188	ACTR2,PPP1R12A,RHOBTB2
Dopamine-DARPP32 Feedback in cAMP Signaling	0	0.161	CAMKK1,PPP1R12A,PPP2R2A,PRKAR2A,PTPA
NGF Signaling	0	0.143	BAX,MAP3K5,PIK3R4,RPS6KA4
Paxillin Signaling	0	0.118	PIK3R4,TLN2
Signaling by Rho Family GTPases	0	0.2	ACTR2,CDH11,CIT,JUN,NEDD4,PIK3R4,PPP1R12A,RHOBTB2,SEPTIN8
RHOGDI Signaling	0	0.156	ACTR2,CDH11,DGKZ,PPP1R12A,RHOBTB2
Sertoli Cell-Sertoli Cell Junction Signaling	0	0.179	ILK,JUN,MAP3K5,NECTIN1,NECTIN3,PRKAR2A,TUBA4A
Gap Junction Signaling	0	0.1	PIK3R4,PRKAR2A,TUBA4A
Telomerase Signaling	0	0.233	E2F1,HSP90AB1,PIK3R4,PPP2R2A,PTPA,RB1,TERT
Mouse Embryonic Stem Cell Pluripotency	0	0.13	DVL1,FZD1,PIK3R4
Hematopoiesis from Pluripotent Stem Cells	0	0.25	KITLG
iNOS Signaling	0	0.25	IRAK1,IRAK2,JUN
VEGF Family Ligand-Receptor Interactions	0	0.125	PIK3R4,VEGFC
Ephrin A Signaling	0	0.111	PIK3R4
Ephrin B Signaling	0	0.0714	HNRNPK
ERBB Signaling	0	0.176	JUN,NRG1,PIK3R4
ERB2-ERBB3 Signaling	0	0.273	JUN,NRG1,PIK3R4
ERBB4 Signaling	0	0.143	NRG1,PIK3R4
GDNF Family Ligand-Receptor Interactions	0	0.143	JUN,PIK3R4
Netrin Signaling	0	0.111	PRKAR2A
Heparan Sulfate Biosynthesis	0	0.273	EXTL3,HS3ST5,XYLT2
Fatty Acid Activation	0	0.25	ACSL4
Heparan Sulfate Biosynthesis (Late Stages)	0	0.222	EXTL3,HS3ST5
Glutaryl-CoA Degradation	0	0.25	HSD17B10
tRNA Splicing	0	0.222	PDE7A,TSEN2
D-myo-inositol-5-phosphate Metabolism	0	0.179	CDC25A,CDC25B,CDC25C,PPP1R12A,PPP2R2A,PTPA,SET
γ-linolenate Biosynthesis II (Animals)	0	0.2	ACSL4
D-myo-inositol (1,4,5)-Trisphosphate Biosynthesis	0	0.167	PI4K2B
Estrogen Biosynthesis	0	0.2	HSD17B10
Chondroitin Sulfate Biosynthesis	0	0.222	HS3ST5,XYLT2
Dermatan Sulfate Biosynthesis	0	0.273	DSEL,HS3ST5,XYLT2
Glycogen Degradation III	0	0.25	MTAP
Glutathione-mediated Detoxification	0	0.25	GSTO1
tRNA Charging	0	0.273	FARSB,KARS1,MARS2
D-myo-inositol (1,4,5,6)-Tetrakisphosphate Biosynthesis	0	0.189	CDC25A,CDC25B,CDC25C,PPP1R12A,PPP2R2A,PTPA,SET
Superpathway of Inositol Phosphate Compounds	0	0.196	CDC25A,CDC25B,CDC25C,PI4K2B,PIK3R4,PPP1R12A,PPP2R2A,PTPA,SET
Mitochondrial L-carnitine Shuttle Pathway	0	0.2	ACSL4
D-myo-inositol (3,4,5,6)-tetrakisphosphate Biosynthesis	0	0.189	CDC25A,CDC25B,CDC25C,PPP1R12A,PPP2R2A,PTPA,SET
TCA Cycle II (Eukaryotic)	0	0.25	DLD
3-phosphoinositide Degradation	0	0.175	CDC25A,CDC25B,CDC25C,PPP1R12A,PPP2R2A,PTPA,SET
3-phosphoinositide Biosynthesis	0	0.209	CDC25A,CDC25B,CDC25C,PI4K2B,PIK3R4,PPP1R12A,PPP2R2A,PTPA,SET
Tryptophan Degradation III (Eukaryotic)	0	0.25	HSD17B10
2-oxobutanoate Degradation I	0	0.25	DLD
Chondroitin Sulfate Biosynthesis (Late Stages)	0	0.143	HS3ST5
Stearate Biosynthesis I (Animals)	0	0.214	ACSL4,OSGEPL1,PPT1
Antioxidant Action of Vitamin C	0	0.0476	GSTO1
Epithelial Adherens Junction Signaling	0	0.225	ACTR2,ECT2,NECTIN1,NECTIN3,PPP2R2A,PRKAA1,PTPA,RACGAP1,YWHAE
Gαi Signaling	0	0.118	PRKAR2A,S1PR1
Gαq Signaling	0	0.0645	PIK3R4,RHOBTB2
Gαs Signaling	0	0.0833	PRKAR2A
Inhibition of Matrix Metalloproteases	0	0.2	MMP1,SDC1
PEDF Signaling	0	0.0952	PIK3R4,PPARG
Regulation of Cellular Mechanics by Calpain Protease	0	0.278	CCND3,CCNE2,CDK4,RB1,TLN2
Remodeling of Epithelial Adherens Junctions	0	0.222	ACTR2,TUBA4A
Agranulocyte Adhesion and Diapedesis	0	0.0833	MMP1
Granulocyte Adhesion and Diapedesis	0	0.214	IL1RAP,MMP1,SDC1
Regulation of the Epithelial-Mesenchymal Transition Pathway	0	0.0851	DVL1,FZD1,PIK3R4,TWIST1
Sperm Motility	0	0.0571	PRKAR2A,TYRO3
TEC Kinase Signaling	0	0.08	PIK3R4,RHOBTB2
UVA-Induced MAPK Signaling	0	0.174	JUN,PARP1,PIK3R4,RPS6KA4
UVB-Induced MAPK Signaling	0	0.182	JUN,PIK3R4
UVC-Induced MAPK Signaling	0	0.143	ATR,JUN
Vitamin-C Transport	0	0.286	GSTO1,LRRC8C
STAT3 Pathway	0	0.0417	CDC25A
Adipogenesis pathway	0	0.2	FZD1,GTF2H3,HAT1,PAXIP1,PPARG,RB1,SAP30
PCP (Planar Cell Polarity) Pathway	0	0.222	DVL1,FZD1,JUN,VANGL1
Unfolded protein response	0	0.192	CEBPZ,DNAJA3,HSPA14,MAP3K5,PPARG
WNT/Ca+ pathway	0	0.133	DVL1,FZD1
Toll-like Receptor Signaling	0	0.214	IRAK1,IRAK2,JUN
EGF Signaling	0	0.125	JUN,PIK3R4
ERK/MAPK Signaling	0	0.186	PIK3R4,PPARG,PPP1R12A,PPP2R2A,PRKAR2A,PTPA,RPS6KA4,TLN2
SAPK/JNK Signaling	0	0.167	HNRNPK,JUN,MAP3K5,PIK3R4
PI3K/AKT Signaling	0	0.189	CDC37,HSP90AB1,ILK,MAP3K5,PPP2R2A,PTPA,YWHAE
PTEN Signaling	0	0.0741	ILK,MAGI3
Cardiac β-adrenergic Signaling	0	0.25	AKAP1,PDE7A,PPP1R12A,PPP2R2A,PRKAR2A,PTPA
Interferon Signaling	0	0.0769	BAX
IL-2 Signaling	0	0.182	JUN,PIK3R4
Amyloid Processing	0	0.125	PRKAR2A
FGF Signaling	0	0.143	MAP3K5,MAPKAPK2,PIK3R4
Endoplasmic Reticulum Stress Pathway	0	0.222	EIF2S1,MAP3K5
JAK/STAT Signaling	0	0.1	JUN,PIK3R4
GABA Receptor Signaling	0	0.0714	KCNN2
Xenobiotic Metabolism Signaling	0	0.209	ALDH16A1,GSTO1,HS3ST5,HSP90AB1,MAP3K5,NRIP1,PIK3R4,PPP2R2A,PTPA
IL-4 Signaling	0	0.105	COL5A3,COL7A1,NR3C1,PIK3R4
B Cell Receptor Signaling	0	0.0909	JUN,MAP3K5,PIK3R4
WNT/β-catenin Signaling	0	0.184	DVL1,FZD1,ILK,JUN,PPP2R2A,PTPA,TLE3
Insulin Receptor Signaling	0	0.174	EIF2B3,PIK3R4,PPP1R12A,PRKAR2A
Chemokine Signaling	0	0.0952	JUN,PPP1R12A
Neurotrophin/TRK Signaling	0	0.167	JUN,MAP3K5,PIK3R4
Integrin Signaling	0	0.143	ACTR2,ILK,PIK3R4,PPP1R12A,RHOBTB2,TLN2
Death Receptor Signaling	0	0.15	DFFA,MAP3K5,PARP1
PPAR Signaling	0	0.286	HSP90AB1,IL1RAP,JUN,NRIP1,PDGFC,PPARG
IGF-1 Signaling	0	0.208	JUN,NEDD4,PIK3R4,PRKAR2A,YWHAE
cAMP-mediated signaling	0	0.138	AKAP1,PDE7A,PRKAR2A,S1PR1
Glutamate Receptor Signaling	0	0.125	HOMER1
TGF-β Signaling	0	0.0526	JUN
Apoptosis Signaling	0	0.154	BAX,DFFA,MAP3K5,PARP1
Notch Signaling	0	0.1	DLL4
NF-κB Signaling	0	0.12	IRAK1,PIK3R4,TRAF3
VEGF Signaling	0	0.28	EIF1AX,EIF2B3,EIF2S1,PDGFC,PIK3R4,VEGFC,YWHAE
T Cell Receptor Signaling	0	0.0625	JUN,PIK3R4
G-Protein Coupled Receptor Signaling	0	0.146	F2R,F2RL1,FZD1,GPR3,GPRIN1,JUN,KCNN2,MAP3K5,PDE7A,PIK3R4,PRKAR2A,S1PR1
IL-6 Signaling	0	0.167	IL1RAP,JUN,MAPKAPK2,PIK3R4
PDGF Signaling	0	0.2	JUN,PDGFC,PIK3R4,SPHK1
BMP signaling pathway	0	0.143	JUN,PRKAR2A
GPCR-Mediated Integration of Enteroendocrine Signaling Exemplified by an L Cell	0	0.2	PRKAR2A
GPCR-Mediated Nutrient Sensing in Enteroendocrine Cells	0	0.111	PRKAR2A
Gustation Pathway	0	0.158	KCNN2,LRRC8C,PRKAR2A
Phagosome Formation	0	0.127	ACTR2,AP1S1,F2R,F2RL1,FZD1,GPR3,PIK3R4,S1PR1,SPHK1,TLN2
Phagosome Maturation	0	0.136	M6PR,TUBA4A,VPS37B
Autophagy	0	0.222	ATR,E2F1,JUN,PIK3R4,PPP2R2A,PRKAA1,PRKAR2A,PTPA,RIPK2,TRAF3
Macropinocytosis Signaling	0	0.133	PDGFC,PIK3R4
PD-1, PD-L1 cancer immunotherapy pathway	0	0.0625	PIK3R4
Th1 and Th2 Activation Pathway	0	0.19	DLL4,JUN,PIK3R4,S1PR1
Th1 Pathway	0	0.143	DLL4,PIK3R4
Th2 Pathway	0	0.214	JUN,PIK3R4,S1PR1
Osteoarthritis Pathway	0	0.2	FZD1,HMGB1,IL1RAP,MMP1,MYBBP1A,PDGFC,PPARG,PRKAA1,SPHK1,VEGFC
GP6 Signaling Pathway	0	0.115	COL5A3,COL7A1,PIK3R4
Neuroinflammation Signaling Pathway	0	0.17	BIRC5,FZD1,HMGB1,IRAK1,IRAK2,JUN,PIK3R4,TRAF3
Opioid Signaling Pathway	0	0.0465	PRKAR2A,RPS6KA4
Adrenomedullin signaling pathway	0	0.185	BAX,KCNN2,PIK3R4,PPARG,PRKAR2A
Iron homeostasis signaling pathway	0	0.136	ABCB10,CUL1,HMOX2
SPINK1 Pancreatic Cancer Pathway	0	0.25	F2RL1,PRSS3
SPINK1 General Cancer Pathway	0	0.2	PIK3R4,PRSS3
Endocannabinoid Neuronal Synapse Pathway	0	0.125	NDUFS2,PRKAR2A
Endocannabinoid Developing Neuron Pathway	0	0.12	BRCA1,PIK3R4,PRKAR2A
Endocannabinoid Cancer Inhibition Pathway	0	0.229	CCND3,CCNE2,PDGFC,PIK3R4,PRKAA1,PRKAR2A,TWIST1,VEGFC
Apelin Liver Signaling Pathway	0	0.2	COL5A3
Apelin Cardiac Fibroblast Signaling Pathway	0	0.286	PRKAA1,SPHK1
Apelin Adipocyte Signaling Pathway	0	0.167	PRKAA1,PRKAR2A
Apelin Cardiomyocyte Signaling Pathway	0	0.0588	PIK3R4
Apelin Endothelial Signaling Pathway	0	0.174	JUN,KLF2,PIK3R4,PRKAA1
BAG2 Signaling Pathway	0	0.238	HSPA14,MAPKAPK2,PSMC6,PSMD12,PSME4
Cardiac Hypertrophy Signaling (Enhanced)	0	0.108	DVL1,EIF2B3,FZD1,JUN,MAP3K5,MAPKAPK2,PDE7A,PIK3R4,PRKAR2A
FAT10 Signaling Pathway	0	0.273	PSMC6,PSMD12,PSME4
FAT10 Cancer Signaling Pathway	0	0.0833	PCNA
PFKFB4 Signaling Pathway	0	0.0667	PRKAR2A
T Cell Exhaustion Signaling Pathway	0	0.143	JUN,PIK3R4,PPP2R2A,PTPA
Synaptogenesis Signaling Pathway	0	0.173	ACTR2,CDH11,CLASP2,NAP1L1,NECTIN1,NECTIN3,PIK3R4,PRKAR2A,SGTA
IL-23 Signaling Pathway	0	0.167	PIK3R4
Systemic Lupus Erythematosus In T Cell Signaling Pathway	0	0.122	JUN,PIK3R4,PPP2R2A,PTPA,RHOBTB2
Systemic Lupus Erythematosus In B Cell Signaling Pathway	0	0.114	CCND3,IRAK1,JUN,PIK3R4,TRAF3
White Adipose Tissue Browning Pathway	0	0.286	LDHB,NRF1,PPARG,PRKAA1,PRKAR2A,SLC16A1
HOTAIR Regulatory Pathway	0	0.214	EED,MMP1,PIK3R4,RBM38,SUZ12,TWIST1
Hepatic Fibrosis Signaling Pathway	0	0.175	COL5A3,DVL1,FZD1,IL1RAP,IRAK1,IRAK2,JUN,MMP1,PDGFC,PIK3R4,PPARG,PRKAR2A,RHOBTB2,VEGFC
Necroptosis Signaling Pathway	0	0.229	MLKL,RB1,RBL1,SLC25A13,TIMM13,TIMM8A,TYRO3,VDAC1
Xenobiotic Metabolism General Signaling Pathway	0	0.115	GSTO1,MAP3K5,PIK3R4
Xenobiotic Metabolism CAR Signaling Pathway	0	0.219	ALDH16A1,GSTO1,HS3ST5,HSP90AB1,NRIP1,PPP2R2A,PTPA
Insulin Secretion Signaling Pathway	0	0.2	DLD,EIF2B3,EIF2S1,EIF4A3,PDHA1,PIK3R4,PRKAR2A,SRP72
Semaphorin Neuronal Repulsive Signaling Pathway	0	0.0968	PIK3R4,PPP1R12A,PRKAR2A
Regulation Of The Epithelial Mesenchymal Transition By Growth Factors Pathway	0	0.146	DOCK10,JUN,MMP1,PDGFC,PIK3R4,TWIST1
Regulation Of The Epithelial Mesenchymal Transition In Development Pathway	0	0.174	BRCA1,DVL1,FZD1,TWIST1
Coronavirus Replication Pathway	0	0.222	HNRNPA1,TUBA4A
Tumor Microenvironment Pathway	0	0.171	JUN,MMP1,PDGFC,PIK3R4,SLC16A1,VEGFC
MSP-RON Signaling In Cancer Cells Pathway	0	0.208	JUN,PDGFC,PIK3R4,VEGFC,YWHAE
MSP-RON Signaling In Macrophages Pathway	0	0.125	JUN,PIK3R4
Calcium Signaling	0	0.152	ASPH,CAMKK1,CHRNA5,LETM1,PRKAR2A
GM-CSF Signaling	0	0.0625	PIK3R4
Complement System	0	0.167	C1QBP
Eicosanoid Signaling	0	0.111	PTGES2
Ephrin Receptor Signaling	0	0.075	ACTR2,PDGFC,VEGFC
Ferroptosis Signaling Pathway	0	0.212	ACSL4,BAP1,G3BP1,PRKAA1,RB1,RBL1,USP7
Role of MAPK Signaling in Promoting the Pathogenesis of Influenza	0	0.133	BAX,JUN,MAP3K5,NUP153
Role of MAPK Signaling in Inhibiting the Pathogenesis of Influenza	0	0.143	BAX,JUN,MAP3K5

## Sheet: Results increased MESOR in old
Filtering criteria: CircaCompare MESOR difference q < 0.05, MESOR difference (old – young) > 0
Ingenuity Canonical Pathways	-log(Enrichment p-value)	Fraction of pathway covered	Molecules
Superpathway of Cholesterol Biosynthesis	10.4	0.933	ACAT2,CYP51A1,DHCR24,DHCR7,FDFT1,FDPS,HMGCR,HMGCS1,HSD17B7,LSS,MVD,MVK,NSDHL,SQLE
Cholesterol Biosynthesis I	5.69	0.889	CYP51A1,DHCR24,DHCR7,FDFT1,HSD17B7,LSS,NSDHL,SQLE
Cholesterol Biosynthesis II (via 24,25-dihydrolanosterol)	5.69	0.889	CYP51A1,DHCR24,DHCR7,FDFT1,HSD17B7,LSS,NSDHL,SQLE
Cholesterol Biosynthesis III (via Desmosterol)	5.69	0.889	CYP51A1,DHCR24,DHCR7,FDFT1,HSD17B7,LSS,NSDHL,SQLE
Phagosome Formation	5.31	0.354	ADORA2B,ADRA1B,ARPC1B,C3,CD36,CELSR3,CHRM2,DOCK1,FZD4,GAB2,GABBR1,GPR108,GPR176,GPRC5B,HMOX1,ITGA11,OXTR,PIK3C3,PLA2G4C,PLA2G6,PLA2R1,PLAAT4,PLD3,PNPLA8,PRKCI,RAPGEF1,ROCK2,WIPF1
Neurovascular Coupling Signaling Pathway	5.25	0.485	ADORA2B,CACNA1A,CACNB1,CHRM2,GABBR1,GABRE,PLA2G4C,PLA2G6,PLA2R1,PLAAT4,PNPLA8,PPP1R12B,PRKG1,ROCK2,SMARCC2,STIM1
Superpathway of Geranylgeranyldiphosphate Biosynthesis I (via Mevalonate)	4.93	1	ACAT2,FDPS,HMGCR,HMGCS1,MVD,MVK
Mevalonate Pathway I	4.11	1	ACAT2,HMGCR,HMGCS1,MVD,MVK
Oxytocin In Brain Signaling Pathway	3.56	0.419	ATF4,CACNA1A,CACNB1,GNAI1,NLRP1,OXTR,PIK3C3,PLA2G4C,PLA2G6,PLA2R1,PLAAT4,PNPLA8,PRKCI
Oxytocin Signaling Pathway	3.19	0.34	ATF4,ATP2B1,ATP2B4,CACNA1A,CACNB1,CD36,GNAI1,OXTR,PIK3C3,PLA2G4C,PLA2G6,PPARA,PPP1R12B,PRKCI,PRKG1,ROCK2,SMARCC2
Phospholipases	3.16	0.583	HMOX1,PLA2G4C,PLA2G6,PLA2R1,PLAAT4,PLD3,PNPLA8
S100 Family Signaling Pathway	3.02	0.269	ADAM10,ADORA2B,ADRA1B,AHNAK,ATF4,ATP2A2,BSG,CACNA1A,CACNB1,CD36,CELSR3,CHRM2,CTSD,FZD4,GABBR1,GPR108,GPR176,GPRC5B,IKBKB,IRAK4,OXTR,PIK3C3,PLA2G4C,PLA2G6,PRKCI,ROCK2,SMAD6,STK38,WNT2B
Synaptic Long Term Depression	2.66	0.379	CACNA1A,CACNB1,GNAI1,PLA2G4C,PLA2G6,PLA2R1,PLAAT4,PNPLA8,PRKCI,PRKG1,SMARCC2
Calcium Transport I	2.64	0.8	ATP2A1,ATP2A2,ATP2B1,ATP2B4
Xenobiotic Metabolism General Signaling Pathway	2.51	0.385	ABCA2,FTL,GCLC,GSTK1,GSTM2,HMOX1,NR1H2,PIK3C3,PPARA,PRKCI
Retinoate Biosynthesis I	2.46	1	ADH1B,RDH10,RDH11
Gustation Pathway	2.38	0.421	CACNA1A,CACNB1,CD36,GABRE,LIPA,SCN8A,STIM1,TRPM4
Endothelin-1 Signaling	2.28	0.344	GAB1,GNAI1,HMOX1,PIK3C3,PLA2G4C,PLA2G6,PLA2R1,PLAAT4,PLD3,PNPLA8,PRKCI
Eicosanoid Signaling	2.24	0.556	PLA2G4C,PLA2G6,PLA2R1,PLAAT4,PNPLA8
Antioxidant Action of Vitamin C	2.07	0.381	HMOX1,IKBKB,PLA2G4C,PLA2G6,PLA2R1,PLAAT4,PLD3,PNPLA8
GABA Receptor Signaling	1.93	0.429	AP2A1,CACNA1A,CACNB1,GABBR1,GABRE,GNAI1
Zymosterol Biosynthesis	1.91	0.75	CYP51A1,HSD17B7,NSDHL
Phospholipase C Signaling	1.73	0.277	AHNAK,ARHGEF2,ARHGEF9,ATF4,HDAC7,HDAC9,HMOX1,ITGA11,PLA2G4C,PLA2G6,PLD3,PPP1R12B,PRKCI
LXR/RXR Activation	1.65	0.35	C3,CD36,CYP51A1,FDFT1,HMGCR,LDLR,NR1H2
Epoxysqualene Biosynthesis	1.64	1	FDFT1,SQLE
Ketogenesis	1.64	1	ACAT2,HMGCS1
The Visual Cycle	1.64	1	RDH10,RDH11
Acetone Degradation I (to Methylglyoxal)	1.64	1	CYP51A1,PTGR3
FAK Signaling	1.58	0.237	ADORA2B,ADRA1B,ARHGAP35,ARPC1B,CELSR3,CHRM2,DOCK1,ECM2,ELF1,FZD4,GABBR1,GPR108,GPR176,GPRC5B,ITGA11,OXTR,PIK3C3,SOCS2,WIPF1
Estrogen Biosynthesis	1.57	0.6	CYP51A1,HSD17B11,HSD17B7
Noradrenaline and Adrenaline Degradation	1.57	0.6	ADH1B,ALDH4A1,COMT
Apelin Cardiomyocyte Signaling Pathway	1.49	0.353	ATP2A1,ATP2A2,GNAI1,PIK3C3,PRKCI,SLC9A8
CREB Signaling in Neurons	1.48	0.242	ADORA2B,ADRA1B,ATF4,CACNA1A,CACNB1,CELSR3,CHRM2,FZD4,GABBR1,GNAI1,GPR108,GPR176,GPRC5B,OXTR,PIK3C3,PRKCI
G-Protein Coupled Receptor Signaling	1.48	0.232	ADORA2B,ADRA1B,ATF4,CELSR3,CHRM2,FOXO3,FZD4,GABBR1,GNAI1,GPR108,GPR176,GPRC5B,IKBKB,LATS2,MKNK1,OXTR,PIK3C3,RAPGEF1,ROCK2
Ephrin A Signaling	1.46	0.444	ADAM10,EPHA4,PIK3C3,ROCK2
GPCR-Mediated Nutrient Sensing in Enteroendocrine Cells	1.46	0.444	CACNA1A,CACNB1,GNAI1,PRKCI
Cardiac Hypertrophy Signaling (Enhanced)	1.43	0.229	ADRA1B,ATP2A1,ATP2A2,CACNA1A,CACNB1,DIAPH2,FGF7,FZD4,GNAI1,HDAC7,HDAC9,IKBKB,ITGA11,MKNK1,PIK3C3,PRKCI,PRKG1,ROCK2,WNT2B
Corticotropin Releasing Hormone Signaling	1.42	0.318	ATF4,CACNA1A,CACNB1,GNAI1,PRKCI,PTCH1,SMARCC2
Type II Diabetes Mellitus Signaling	1.39	0.296	ACSL5,CACNA1A,CACNB1,CD36,IKBKB,PIK3C3,PRKCI,SOCS2
LPS/IL-1 Mediated Inhibition of RXR Function	1.37	0.281	ACSL5,ALDH1L2,ALDH4A1,CPT1B,GSTK1,GSTM2,HMGCS1,NR1H2,PPARA
Fcγ Receptor-mediated Phagocytosis in Macrophages and Monocytes	1.32	0.304	ARPC1B,DOCK1,GAB2,HMOX1,PLA2G6,PLD3,PRKCI
Stearate Biosynthesis I (Animals)	1.32	0.357	ACOT1,ACSL5,DHCR24,PLA2G6,PTGR3
Complement System	1.32	0.5	C1S,C3,CD46
Hepatic Fibrosis Signaling Pathway	1.31	0.225	ATF4,CACNA1A,CACNB1,CDKN1B,FTH1,FTL,FZD4,GNAI1,IKBKB,IRAK4,ITGA11,LRP1,LRP5,PIK3C3,PRKCI,PTCH1,ROCK2,WNT2B
Calcium Signaling	1.29	0.273	ATF4,ATP2A1,ATP2A2,ATP2B1,ATP2B4,CACNA1A,CACNB1,HDAC7,HDAC9
Inhibition of Matrix Metalloproteases	1.29	0.4	ADAM10,ADAM17,LRP1,TIMP2
Axonal Guidance Signaling	1.26	0.222	ADAM10,ADAM17,ADAMTS1,ARPC1B,DOCK1,EPHA4,FZD4,GNAI1,ITGA11,MICAL1,MKNK1,NTN4,PIK3C3,PRKCI,PTCH1,ROCK2,WIPF1,WNT2B
Dilated Cardiomyopathy Signaling Pathway	1.26	0.316	ATP2A2,CACNA1A,CACNB1,GAB1,LAMA4,UTRN
Nitric Oxide Signaling in the Cardiovascular System	1.23	0.292	ATP2A1,ATP2A2,CACNA1A,CACNB1,PIK3C3,PRKCI,PRKG1
Dopamine Degradation	1.21	0.667	ALDH4A1,COMT
Acyl-CoA Hydrolysis	1.21	0.667	ACOT1,PLA2G6
Choline Biosynthesis III	1.21	0.667	HMOX1,PLD3
Retinol Biosynthesis	1.21	0.667	RDH10,RDH11
CLEAR Signaling Pathway	1.16	0.232	ATF4,ATP6V1A,CTSD,GAA,GBA1,GLB1,HEXB,HPS5,IKBKB,NEU1,PPARA,PRKCI,PSAP
Sperm Motility	1.15	0.257	EPHA4,GNAI1,PLA2G4C,PLA2G6,PLA2R1,PLAAT4,PNPLA8,PRKCI,PRKG1
Oxytocin In Spinal Neurons Signaling Pathway	1.12	0.429	OXTR,PRKG1,SMARCC2
Circadian Rhythm Signaling	1.12	0.239	ATF4,BMAL1,CACNA1A,CACNB1,GNAI1,MKNK1,NFIL3,PER1,PRKCI,PRKG1,SMARCC2
Actin Nucleation by ARP-WASP Complex	1.09	0.312	ARPC1B,ITGA11,PPP1R12B,ROCK2,WIPF1
Dopamine-DARPP32 Feedback in cAMP Signaling	1.07	0.258	ATF4,ATP2A1,ATP2A2,CACNA1A,CACNB1,GNAI1,PRKCI,PRKG1
Gαq Signaling	1.07	0.258	ADRA1B,GNAI1,HMOX1,IKBKB,PIK3C3,PLD3,PRKCI,ROCK2
CCR3 Signaling in Eosinophils	1.07	0.269	GNAI1,PIK3C3,PLA2G4C,PLA2G6,PPP1R12B,PRKCI,ROCK2
RHOGDI Signaling	1.01	0.25	ARHGAP35,ARHGEF2,ARHGEF9,ARPC1B,GNAI1,ITGA11,PPP1R12B,ROCK2
TR/RXR Activation	0.997	0.294	ATP2A1,F10,LDLR,PIK3C3,SREBF2
ERK/MAPK Signaling	0.986	0.233	ATF4,DOCK1,ELF1,ITGA11,MKNK1,PIK3C3,PLA2G4C,PLA2G6,PRKCI,RAPGEF1
FcγRIIB Signaling in B Lymphocytes	0.971	0.375	CACNA1A,CACNB1,PIK3C3
Glutathione-mediated Detoxification	0.955	0.5	GSTK1,GSTM2
Myo-inositol Biosynthesis	0.955	0.5	IMPA2,ISYNA1
Ferroptosis Signaling Pathway	0.945	0.242	ATF4,FDFT1,FTH1,FTL,GCLC,HMGCR,HMOX1,SREBF2
NRF2-mediated Oxidative Stress Response	0.933	0.227	ATF4,DNAJB2,FTH1,FTL,GCLC,GSTK1,GSTM2,HMOX1,PIK3C3,PRKCI
Insulin Receptor Signaling	0.915	0.261	FOXO3,GAB1,PIK3C3,PRKCI,RAPGEF1,SGK1
Actin Cytoskeleton Signaling	0.91	0.231	ARHGAP35,ARPC1B,DIAPH2,DOCK1,FGF7,ITGA11,PIK3C3,PPP1R12B,ROCK2
Signaling by Rho Family GTPases	0.883	0.222	ARHGEF2,ARHGEF9,ARPC1B,GNAI1,ITGA11,PIK3C3,PPP1R12B,PRKCI,ROCK2,WIPF1
HGF Signaling	0.865	0.241	DOCK1,ELF1,GAB1,ITGA11,PIK3C3,PRKCI,RAPGEF1
Ephrin Receptor Signaling	0.857	0.225	ADAM10,ARPC1B,ATF4,EPHA4,GNAI1,ITGA11,RAPGEF1,ROCK2,WIPF1
CDC42 Signaling	0.846	0.25	ARPC1B,EXOC4,ITGA11,PPP1R12B,PRKCI,WIPF1
Netrin Signaling	0.844	0.333	CACNA1A,CACNB1,PRKG1
ERBB4 Signaling	0.826	0.286	ADAM17,PIK3C3,PRKCI,PSEN1
Xenobiotic Metabolism AHR Signaling Pathway	0.826	0.286	ALDH1L2,ALDH4A1,GSTK1,GSTM2
Role of Lipids/Lipid Rafts in the Pathogenesis of Influenza	0.821	1	FDPS
NAD Biosynthesis from 2-amino-3-carboxymuconate Semialdehyde	0.821	1	NADSYN1
Bupropion Degradation	0.821	1	CYP51A1
NAD biosynthesis II (from tryptophan)	0.821	1	NADSYN1
Ubiquinol-10 Biosynthesis (Eukaryotic)	0.821	1	MICAL1
Pentose Phosphate Pathway (Oxidative Branch)	0.821	1	PGLS
Superpathway of Serine and Glycine Biosynthesis I	0.821	1	PHGDH
Serine Biosynthesis	0.821	1	PHGDH
Oleate Biosynthesis II (Animals)	0.821	1	FADS2
Proline Degradation	0.821	1	ALDH4A1
L-DOPA Degradation	0.821	1	COMT
Glutathione Biosynthesis	0.821	1	GCLC
4-hydroxyproline Degradation I	0.821	1	ALDH4A1
Ketolysis	0.821	1	ACAT2
Thyroid Hormone Biosynthesis	0.821	1	CTSD
Histidine Degradation VI	0.821	1	MICAL1
Trans, trans-farnesyl Diphosphate Biosynthesis	0.821	1	FDPS
Pregnenolone Biosynthesis	0.821	1	MICAL1
Lanosterol Biosynthesis	0.821	1	LSS
Lactose Degradation III	0.821	1	GLB1
Breast Cancer Regulation by Stathmin1	0.815	0.198	ADORA2B,ADRA1B,ARHGEF2,ARHGEF9,ATF4,CDKN1B,CELSR3,CHRM2,FZD4,GABBR1,GPR108,GPR176,GPRC5B,OXTR,PIK3C3,PRKCI
Factors Promoting Cardiogenesis in Vertebrates	0.806	0.233	ATF4,FZD4,LRP1,LRP5,PRKCI,ROCK2,WNT2B
Neuroinflammation Signaling Pathway	0.791	0.213	ATF4,GABBR1,GABRE,HMOX1,IKBKB,IRAK4,PIK3C3,PLA2G4C,PLA2G6,PSEN1
Neuregulin Signaling	0.782	0.24	ADAM17,CDKN1B,ITGA11,PRKCI,PSEN1,RNF41
Atherosclerosis Signaling	0.782	0.24	CD36,PLA2G4C,PLA2G6,PLA2R1,PLAAT4,PNPLA8
Thrombin Signaling	0.78	0.222	ARHGEF2,ARHGEF9,GNAI1,IKBKB,PIK3C3,PPP1R12B,PRKCI,ROCK2
γ-linolenate Biosynthesis II (Animals)	0.778	0.4	ACSL5,FADS2
Mitochondrial L-carnitine Shuttle Pathway	0.778	0.4	ACSL5,CPT1B
Serotonin Degradation	0.778	0.4	ADH1B,ALDH4A1
Ethanol Degradation II	0.778	0.4	ADH1B,ALDH4A1
GPCR-Mediated Integration of Enteroendocrine Signaling Exemplified by an L Cell	0.778	0.4	CHRM2,GNAI1
Fc Epsilon RI Signaling	0.76	0.25	GAB1,PIK3C3,PLA2G4C,PLA2G6,PRKCI
CCR5 Signaling in Macrophages	0.743	0.267	CACNA1A,CACNB1,GNAI1,PRKCI
Cellular Effects of Sildenafil (Viagra)	0.743	0.267	CACNA1A,CACNB1,PPP1R12B,PRKG1
Unfolded protein response	0.724	0.231	ATF4,DNAJB2,HSPA2,INSIG1,MBTPS1,SREBF2
Xenobiotic Metabolism Signaling	0.717	0.209	ALDH1L2,ALDH4A1,FTL,GCLC,GSTK1,GSTM2,HMOX1,PIK3C3,PRKCI
Role of MAPK Signaling in the Pathogenesis of Influenza	0.696	0.238	PLA2G4C,PLA2G6,PLA2R1,PLAAT4,PNPLA8
White Adipose Tissue Browning Pathway	0.696	0.238	ATF4,CACNA1A,CACNB1,PPARA,PRKG1
Role of MAPK Signaling in Inhibiting the Pathogenesis of Influenza	0.696	0.238	PLA2G4C,PLA2G6,PLA2R1,PLAAT4,PNPLA8
VEGF Family Ligand-Receptor Interactions	0.67	0.25	PIK3C3,PLA2G4C,PLA2G6,PRKCI
MSP-RON Signaling In Macrophages Pathway	0.67	0.25	ATF4,GAB2,IKBKB,PIK3C3
Calcium-induced T Lymphocyte Apoptosis	0.649	0.273	ATP2A1,ATP2A2,PRKCI
Lymphotoxin β Receptor Signaling	0.649	0.273	IKBKB,LTBR,PIK3C3
tRNA Charging	0.649	0.273	QARS1,SARS1,WARS1
PXR/RXR Activation	0.646	0.333	GSTM2,PPARA
IL-9 Signaling	0.646	0.333	PIK3C3,SOCS2
nNOS Signaling in Skeletal Muscle Cells	0.646	0.333	CACNA1A,CACNB1
Chondroitin Sulfate Degradation (Metazoa)	0.646	0.333	CEMIP,HEXB
Glutathione Redox Reactions I	0.646	0.333	GSTK1,GSTM2
Dermatan Sulfate Degradation (Metazoa)	0.646	0.333	CEMIP,HEXB
Iron homeostasis signaling pathway	0.637	0.227	ATP6V1A,FTH1,FTL,HMOX1,LRP1
Role of Osteoblasts, Osteoclasts and Chondrocytes in Rheumatoid Arthritis	0.636	0.2	ACP5,ADAM17,FZD4,IKBKB,LRP1,LRP5,PIK3C3,SMAD6,WNT2B
Macrophage Alternative Activation Signaling Pathway	0.619	0.214	ADORA2B,ATF4,CD36,NR1H2,PIK3C3,TSC22D3
Leukocyte Extravasation Signaling	0.608	0.206	ARHGAP35,GNAI1,PIK3C3,PRKCI,ROCK2,TIMP2,WIPF1
AMPK Signaling	0.597	0.192	ADRA1B,ATF4,CPT1B,FOXO3,GNAI1,HMGCR,PIK3C3,PPM1H,SMARCC2,STIM1
Regulation Of The Epithelial Mesenchymal Transition In Development Pathway	0.584	0.217	ADAM17,FZD4,PSEN1,PTCH1,WNT2B
VDR/RXR Activation	0.572	0.25	CDKN1B,LRP5,PRKCI
NF-κB Activation by Viruses	0.572	0.25	IKBKB,PIK3C3,PRKCI
Angiopoietin Signaling	0.572	0.25	IKBKB,PIK3C3,TNIP1
Maturity Onset Diabetes of Young (MODY) Signaling	0.572	0.25	CACNA1A,CACNB1,KLF11
Gαs Signaling	0.572	0.25	ADORA2B,ATF4,GNAI1
Apelin Adipocyte Signaling Pathway	0.572	0.25	GNAI1,GSTK1,GSTM2
Molecular Mechanisms of Cancer	0.569	0.176	ARHGEF2,ARHGEF9,CDKN1B,FZD4,GAB1,GAB2,GNAI1,HDAC7,HDAC9,ITGA11,LRP1,LRP5,PIK3C3,PRKCI,PSEN1,PTCH1,RAPGEF1,SMAD6,WNT2B
Regulation Of The Epithelial Mesenchymal Transition By Growth Factors Pathway	0.564	0.195	FGF7,GAB1,ID2,IKBKB,LATS2,PIK3C3,TNFSF18,ZEB1
Regulation of the Epithelial-Mesenchymal Transition Pathway	0.563	0.191	ADAM17,FGF7,FZD4,GAB1,ID2,PIK3C3,PSEN1,WNT2B,ZEB1
Creatine-phosphate Biosynthesis	0.554	0.5	CKB
Heme Degradation	0.554	0.5	HMOX1
Melatonin Degradation I	0.554	0.5	CYP51A1
Pentose Phosphate Pathway	0.554	0.5	PGLS
Selenocysteine Biosynthesis II (Archaea and Eukaryotes)	0.554	0.5	SARS1
Methylglyoxal Degradation III	0.554	0.5	PTGR3
Histamine Degradation	0.554	0.5	ALDH4A1
Superpathway of Melatonin Degradation	0.554	0.5	CYP51A1
Arginine Degradation I (Arginase Pathway)	0.554	0.5	ALDH4A1
Putrescine Degradation III	0.554	0.5	ALDH4A1
Regulation of Actin-based Motility by Rho	0.546	0.222	ARPC1B,ITGA11,PPP1R12B,WIPF1
ERK5 Signaling	0.546	0.222	ATF4,FOXO3,GAB1,SGK1
Lipid Antigen Presentation by CD1	0.543	0.286	AP2A1,PSAP
Hepatic Cholestasis	0.535	0.208	IKBKB,IRAK4,NR1H2,PPARA,PRKCI
Cardiac β-adrenergic Signaling	0.535	0.208	ATP2A1,ATP2A2,CACNA1A,CACNB1,GNAI1
IGF-1 Signaling	0.535	0.208	FOXO3,IGFBP7,PIK3C3,PRKCI,SOCS2
Xenobiotic Metabolism PXR Signaling Pathway	0.535	0.208	ALDH1L2,ALDH4A1,GSTK1,GSTM2,PRKCI
Acute Phase Response Signaling	0.53	0.2	C1S,C3,FTL,HMOX1,IKBKB,SOCS2
Role of MAPK Signaling in Promoting the Pathogenesis of Influenza	0.53	0.2	ATP6V1A,PLA2G4C,PLA2G6,PLA2R1,PLAAT4,PNPLA8
Integrin Signaling	0.528	0.19	ARHGAP26,ARPC1B,DOCK1,ITGA11,PIK3C3,PPP1R12B,RAPGEF1,WIPF1
Role of NFAT in Cardiac Hypertrophy	0.528	0.194	CACNA1A,CACNB1,GNAI1,HDAC7,HDAC9,PIK3C3,PRKCI
Antiproliferative Role of Somatostatin Receptor 2	0.505	0.231	CDKN1B,PIK3C3,SMARCC2
3-phosphoinositide Biosynthesis	0.495	0.186	ACP5,CDIPT,IGBP1,NUDT14,PIK3C3,PPM1H,PPP1R12B,PTPRM
IL-13 Signaling Pathway	0.493	0.211	CD36,FOSL2,PIK3C3,ROCK2
IL-3 Signaling	0.493	0.211	GAB2,PIK3C3,PRKCI,RAPGEF1
Estrogen-Dependent Breast Cancer Signaling	0.493	0.211	ATF4,HSD17B11,HSD17B7,PIK3C3
Reelin Signaling in Neurons	0.49	0.194	ARHGEF2,ARHGEF9,ARPC1B,MAPK8IP3,PIK3C3,RAPGEF1
Semaphorin Neuronal Repulsive Signaling Pathway	0.49	0.194	ITGA11,MICAL1,PIK3C3,PPP1R12B,PRKG1,ROCK2
CXCR4 Signaling	0.49	0.2	DOCK1,GNAI1,PIK3C3,PRKCI,ROCK2
NF-κB Signaling	0.49	0.2	IKBKB,IRAK4,LTBR,PIK3C3,TNIP1
MIF-mediated Glucocorticoid Regulation	0.46	0.25	PLA2G4C,PLA2G6
SPINK1 Pancreatic Cancer Pathway	0.46	0.25	CPA4,CPQ
PI3K Signaling in B Lymphocytes	0.449	0.192	ATF4,C3,FOXO3,IKBKB,PRKCI
GDNF Family Ligand-Receptor Interactions	0.447	0.214	DOK6,GAB1,PIK3C3
Toll-like Receptor Signaling	0.447	0.214	IKBKB,IRAK4,PPARA
Th1 Pathway	0.447	0.214	NFIL3,PIK3C3,PSEN1
Immunogenic Cell Death Signaling Pathway	0.446	0.2	ATF4,HSPA2,LRP1,STING1
G Beta Gamma Signaling	0.446	0.2	CACNA1A,CACNB1,GNAI1,PRKCI
PKCθ Signaling in T Lymphocytes	0.446	0.2	CACNA1A,CACNB1,IKBKB,PIK3C3
P2Y Purigenic Receptor Signaling Pathway	0.446	0.2	ATF4,GNAI1,PIK3C3,PRKCI
IL-8 Signaling	0.433	0.178	GNAI1,HMOX1,IKBKB,IRAK4,PIK3C3,PLD3,PRKCI,ROCK2
Synaptogenesis Signaling Pathway	0.414	0.173	AP2A1,ARPC1B,ATF4,CACNB1,EPHA4,LRP1,NLGN1,PIK3C3,RAPGEF1
CDX Gastrointestinal Cancer Signaling Pathway	0.411	0.185	FZD4,IKBKB,KLF5,PIK3C3,WNT2B
PTEN Signaling	0.411	0.185	CDKN1B,FOXO3,IKBKB,ITGA11,MAGI2
Extrinsic Prothrombin Activation Pathway	0.411	0.333	F10
Nicotine Degradation III	0.411	0.333	CYP51A1
NAD Salvage Pathway II	0.411	0.333	ACP5
Tryptophan Degradation X (Mammalian, via Tryptamine)	0.411	0.333	ALDH4A1
NAD Phosphorylation and Dephosphorylation	0.411	0.333	ACP5
Nicotine Degradation II	0.411	0.333	CYP51A1
D-myo-inositol (1,4,5)-trisphosphate Degradation	0.411	0.333	IMPA2
γ-glutamyl Cycle	0.411	0.333	GCLC
Fatty Acid α-oxidation	0.411	0.333	ALDH4A1
Oxidative Ethanol Degradation III	0.411	0.333	ALDH4A1
Ethanol Degradation IV	0.411	0.333	ALDH4A1
Superpathway of Inositol Phosphate Compounds	0.405	0.174	ACP5,CDIPT,IGBP1,NUDT14,PIK3C3,PPM1H,PPP1R12B,PTPRM
Role of Pattern Recognition Receptors in Recognition of Bacteria and Viruses	0.404	0.19	C3,PIK3C3,PRKCI,PTX3
Role of NANOG in Mammalian Embryonic Stem Cell Pluripotency	0.404	0.19	FZD4,GAB1,PIK3C3,WNT2B
PEDF Signaling	0.404	0.19	IKBKB,PIK3C3,ROCK2,ZEB1
FGF Signaling	0.404	0.19	ATF4,FGF7,GAB1,PIK3C3
Thrombopoietin Signaling	0.397	0.2	GAB2,PIK3C3,PRKCI
Basal Cell Carcinoma Signaling	0.397	0.2	FZD4,PTCH1,WNT2B
IL-7 Signaling Pathway	0.397	0.2	CDKN1B,FOXO3,PIK3C3
Role of PI3K/AKT Signaling in the Pathogenesis of Influenza	0.393	0.222	GNAI1,PIK3C3
Endoplasmic Reticulum Stress Pathway	0.393	0.222	ATF4,MBTPS1
Chronic Myeloid Leukemia Signaling	0.387	0.176	CDKN1B,GAB2,HDAC7,HDAC9,IKBKB,PIK3C3
NGF Signaling	0.377	0.179	ATF4,GAB1,IKBKB,PIK3C3,ROCK2
Role Of Osteoblasts In Rheumatoid Arthritis Signaling Pathway	0.369	0.171	CTSD,FZD4,LRP1,LRP5,PIK3C3,SMAD6,WNT2B
fMLP Signaling in Neutrophils	0.365	0.182	ARPC1B,GNAI1,PIK3C3,PRKCI
Endocannabinoid Cancer Inhibition Pathway	0.357	0.171	ATF4,CDKN1B,GNAI1,NUPR1,PIK3C3,ROCK2
ICOS-ICOSL Signaling in T Helper Cells	0.352	0.188	GAB2,IKBKB,PIK3C3
Growth Hormone Signaling	0.352	0.188	PIK3C3,PRKCI,SOCS2
PD-1, PD-L1 cancer immunotherapy pathway	0.352	0.188	CDKN1B,LATS2,PIK3C3
Endocannabinoid Neuronal Synapse Pathway	0.352	0.188	CACNA1A,CACNB1,GNAI1
Androgen Signaling	0.345	0.172	CACNA1A,CACNB1,GNAI1,PRKCI,TAF1
cAMP-mediated signaling	0.345	0.172	ADORA2B,ATF4,CHRM2,GABBR1,GNAI1
p38 MAPK Signaling	0.345	0.172	ATF4,IRAK4,MKNK1,PLA2G4C,PLA2G6
RAR Activation	0.343	0.167	ADH1B,PRKCI,RDH10,RDH11,SMAD6,SMARCC2,TNIP1
Role of Macrophages, Fibroblasts and Endothelial Cells in Rheumatoid Arthritis	0.342	0.162	ATF4,FZD4,IKBKB,IRAK4,LRP1,LRP5,LTBR,PIK3C3,PRKCI,ROCK2,WNT2B
MIF Regulation of Innate Immunity	0.337	0.2	PLA2G4C,PLA2G6
Role of WNT/GSK-3β Signaling in the Pathogenesis of Influenza	0.337	0.2	FZD4,WNT2B
IL-17A Signaling in Airway Cells	0.337	0.2	IKBKB,PIK3C3
Notch Signaling	0.337	0.2	ADAM17,PSEN1
Coronavirus Pathogenesis Pathway	0.321	0.161	ADAM17,ATF4,ATP6V1A,EEF1A1,HDAC7,HDAC9,IKBKB,PIK3C3,STING1
Aryl Hydrocarbon Receptor Signaling	0.318	0.163	ALDH1L2,ALDH4A1,CDKN1B,CTSD,GSTK1,GSTM2,NCOA7
Opioid Signaling Pathway	0.318	0.163	AP2A1,ATF4,CACNA1A,CACNB1,CDKN1B,GNAI1,PRKCI
Coagulation System	0.318	0.25	F10
Cardiomyocyte Differentiation via BMP Receptors	0.318	0.25	SMAD6
TNFR2 Signaling	0.318	0.25	IKBKB
MSP-RON Signaling Pathway	0.318	0.25	PIK3C3
Intrinsic Prothrombin Activation Pathway	0.318	0.25	F10
Fatty Acid Activation	0.318	0.25	ACSL5
Glutaryl-CoA Degradation	0.318	0.25	ACAT2
Isoleucine Degradation I	0.318	0.25	ACAT2
Glycogen Degradation III	0.318	0.25	GAA
Superpathway of D-myo-inositol (1,4,5)-trisphosphate Metabolism	0.318	0.25	IMPA2
Tryptophan Degradation III (Eukaryotic)	0.318	0.25	ACAT2
Antigen Presentation Pathway	0.318	0.25	TAPBP
GNRH Signaling	0.316	0.167	ATF4,CACNA1A,CACNB1,GNAI1,PRKCI
Small Cell Lung Cancer Signaling	0.316	0.167	CDKN1B,HDAC7,HDAC9,IKBKB,PIK3C3
Gap Junction Signaling	0.316	0.167	GNAI1,PIK3C3,PRKCI,PRKG1,SMARCC2
IL-1 Signaling	0.313	0.176	GNAI1,IKBKB,IRAK4
Paxillin Signaling	0.313	0.176	DOCK1,ITGA11,PIK3C3
Gαi Signaling	0.313	0.176	CHRM2,GABBR1,GNAI1
D-myo-inositol (1,4,5,6)-Tetrakisphosphate Biosynthesis	0.305	0.162	ACP5,IGBP1,NUDT14,PPM1H,PPP1R12B,PTPRM
D-myo-inositol (3,4,5,6)-tetrakisphosphate Biosynthesis	0.305	0.162	ACP5,IGBP1,NUDT14,PPM1H,PPP1R12B,PTPRM
PI3K/AKT Signaling	0.305	0.162	CDKN1B,FOXO3,GAB1,GAB2,IKBKB,ITGA11
eNOS Signaling	0.299	0.167	HSPA2,PIK3C3,PRKCI,PRKG1
SAPK/JNK Signaling	0.299	0.167	GAB1,MAPK8IP3,MINK1,PIK3C3
Systemic Lupus Erythematosus In B Cell Signaling Pathway	0.296	0.159	FOXO3,GAB1,IRAK4,PIK3C3,PLAAT4,PRKCI,STING1
ERB2-ERBB3 Signaling	0.29	0.182	CDKN1B,PIK3C3
UVB-Induced MAPK Signaling	0.29	0.182	PIK3C3,PRKCI
FAT10 Signaling Pathway	0.29	0.182	MAP1LC3B,PSMA5
Cardiac Hypertrophy Signaling	0.281	0.158	ADRA1B,CACNA1A,CACNB1,GNAI1,PIK3C3,ROCK2
Pyroptosis Signaling Pathway	0.279	0.167	FOXO3,KCNQ1OT1,NLRP1
Amyotrophic Lateral Sclerosis Signaling	0.279	0.167	CACNA1A,CACNB1,PIK3C3
Renal Cell Carcinoma Signaling	0.279	0.167	GAB1,PIK3C3,RAPGEF1
PCP (Planar Cell Polarity) Pathway	0.279	0.167	FZD4,ROCK2,WNT2B
Neurotrophin/TRK Signaling	0.279	0.167	ATF4,GAB1,PIK3C3
Dendritic Cell Maturation	0.271	0.16	ATF4,IKBKB,LTBR,PIK3C3
Non-Small Cell Lung Cancer Signaling	0.271	0.16	FOXO3,HDAC7,HDAC9,PIK3C3
TEC Kinase Signaling	0.271	0.16	GNAI1,ITGA11,PIK3C3,PRKCI
Endocannabinoid Developing Neuron Pathway	0.271	0.16	ATF4,CDKN1B,GNAI1,PIK3C3
Aldosterone Signaling in Epithelial Cells	0.265	0.156	DNAJB2,HSPA2,PIK3C3,PRKCI,SGK1
Xenobiotic Metabolism CAR Signaling Pathway	0.265	0.156	ALDH1L2,ALDH4A1,GSTK1,GSTM2,PRKCI
D-myo-inositol-5-phosphate Metabolism	0.259	0.154	ACP5,IGBP1,NUDT14,PPM1H,PPP1R12B,PTPRM
TWEAK Signaling	0.252	0.2	IKBKB
Pyrimidine Ribonucleotides Interconversion	0.252	0.2	NUDT18
Inflammasome pathway	0.252	0.2	NLRP1
iNOS Signaling	0.251	0.167	IKBKB,IRAK4
Triacylglycerol Biosynthesis	0.251	0.167	LPIN3,PLPP5
FAT10 Cancer Signaling Pathway	0.251	0.167	EEF1A1,IKBKB
CD28 Signaling in T Helper Cells	0.248	0.158	ARPC1B,IKBKB,PIK3C3
NUR77 Signaling in T Lymphocytes	0.248	0.158	HDAC7,HDAC9,PRKCI
RHOA Signaling	0.245	0.154	ARHGAP35,ARPC1B,PPP1R12B,ROCK2
GP6 Signaling Pathway	0.245	0.154	ADAM10,LAMA4,PIK3C3,PRKCI
Prostate Cancer Signaling	0.242	0.152	ATF4,CDKN1B,HDAC7,HDAC9,PIK3C3
B Cell Receptor Signaling	0.242	0.152	ATF4,GAB1,GAB2,IKBKB,PIK3C3
Caveolar-mediated Endocytosis Signaling	0.217	0.154	COPZ1,ITGA11
Endometrial Cancer Signaling	0.217	0.154	FOXO3,PIK3C3
Glioma Invasiveness Signaling	0.217	0.154	PIK3C3,TIMP2
Role of JAK2 in Hormone-like Cytokine Signaling	0.217	0.154	SH2B3,SOCS2
Tumoricidal Function of Hepatic Natural Killer Cells	0.203	0.167	SRGN
Transcriptional Regulatory Network in Embryonic Stem Cells	0.203	0.167	FOXC1
Pyrimidine Ribonucleotides De Novo Biosynthesis	0.203	0.167	NUDT18
D-myo-inositol (1,4,5)-Trisphosphate Biosynthesis	0.203	0.167	CDIPT
Fatty Acid β-oxidation I	0.203	0.167	ACSL5
Apelin Pancreas Signaling Pathway	0.203	0.167	PIK3C3
IL-23 Signaling Pathway	0.203	0.167	PIK3C3
NAD Signaling Pathway	0	0.103	BMAL1,NADSYN1,PIK3C3
Pulmonary Fibrosis Idiopathic Signaling Pathway	0	0.11	ADAM10,ADAMTS1,FOXO3,FZD4,LATS2,PIK3C3,ROCK2,STK38,WNT2B
Pulmonary Healing Signaling Pathway	0	0.1	FGF7,FZD4,PRKCI,WNT2B
Wound Healing Signaling Pathway	0	0.0465	FGF7,IKBKB
ID1 Signaling Pathway	0	0.0625	CDKN1B,FOXO3,PIK3C3
SNARE Signaling Pathway	0	0.0833	CACNB1
Macrophage Classical Activation Signaling Pathway	0	0.107	IKBKB,IRAK4,STK38
MicroRNA Biogenesis Signaling Pathway	0	0.06	DDX17,HMOX1,PIK3C3
Multiple Sclerosis Signaling Pathway	0	0.1	C3,NLRP1,STK38
Pathogen Induced Cytokine Storm Signaling Pathway	0	0.15	C3,FTH1,FTL,HMGCR,SRGN,STING1
Role Of Chondrocytes In Rheumatoid Arthritis Signaling Pathway	0	0.111	FOXO3,IRAK4,LRP1
Role Of Osteoclasts In Rheumatoid Arthritis Signaling Pathway	0	0.123	ACP5,ADAM10,ADAM17,ATF4,FOXO3,IKBKB,PIK3C3
Ribonucleotide Reductase Signaling Pathway	0	0.0741	ATF4,FOXO3,PIK3C3,SMARCC2
Glucocorticoid Receptor Signaling	0	0.137	DCAF6,FOXO3,HSPA2,IKBKB,KRT34,KRT80,MT-ND4L,PIK3C3,PLA2G4C,PLA2G6,SGK1,SMARCC2,TAF1,TSC22D3
Natural Killer Cell Signaling	0	0.138	HSPA2,IRAK4,PIK3C3,WIPF1
IL-10 Signaling	0	0.111	ATF4,HMOX1,IKBKB
Neutrophil Extracellular Trap Signaling Pathway	0	0.143	DOCK1,MT-ND4L,PIK3C3,PLA2G4C,PLA2G6,PLA2R1,PLAAT4,PNPLA8,PRKCI,STIM1
Synaptic Long Term Potentiation	0	0.087	ATF4,PRKCI
Huntington's Disease Signaling	0	0.145	ATF4,CTSD,HDAC7,HDAC9,HSPA2,PIK3C3,PRKCI,PSMA5,SGK1
PPARα/RXRα Activation	0	0.108	CD36,CPT1B,IKBKB,PPARA
p53 Signaling	0	0.0645	HDAC9,PIK3C3
Hepatic Fibrosis / Hepatic Stellate Cell Activation	0	0.025	TIMP2
Mitochondrial Dysfunction	0	0.143	CPT1B,MT-ND4L,PSEN1,UQCR11
FXR/RXR Activation	0	0.143	C3,PPARA
Ceramide Signaling	0	0.0952	CTSD,PIK3C3
Tight Junction Signaling	0	0.128	ARHGEF2,MAGI2,MPDZ,PRKCI,SPTAN1
Role of BRCA1 in DNA Damage Response	0	0.0233	SMARCC2
Erythropoietin Signaling Pathway	0	0.111	FOXO3,PIK3C3,PRKCI
14-3-3-mediated Signaling	0	0.136	CDKN1B,PIK3C3,PRKCI
α-Adrenergic Signaling	0	0.125	GNAI1,PRKCI
Activation of IRF by Cytosolic Pattern Recognition Receptors	0	0.0714	IKBKB
Clathrin-mediated Endocytosis Signaling	0	0.125	AP2A1,ARPC1B,FGF7,LDLR,PIK3C3
IL-12 Signaling and Production in Macrophages	0	0.136	IKBKB,PIK3C3,PRKCI
Role of RIG1-like Receptors in Antiviral Innate Immunity	0	0.125	IKBKB
Role of PKR in Interferon Induction and Antiviral Response	0	0.0882	HSPA2,IKBKB,NLRP1
Role of NFAT in Regulation of the Immune Response	0	0.125	GNAI1,IKBKB,PIK3C3
LPS-stimulated MAPK Signaling	0	0.15	IKBKB,PIK3C3,PRKCI
CD40 Signaling	0	0.133	IKBKB,PIK3C3
CD27 Signaling in Lymphocytes	0	0.0833	IKBKB
IL-17 Signaling	0	0.0417	PIK3C3
Airway Pathology in Chronic Obstructive Pulmonary Disease	0	0.1	FGF7
4-1BB Signaling in T Lymphocytes	0	0.111	IKBKB
CTLA4 Signaling in Cytotoxic T Lymphocytes	0	0.114	AP2A1,HMOX1,PIK3C3,PLD3
Induction of Apoptosis by HIV1	0	0.0667	IKBKB
B Cell Activating Factor Signaling	0	0.111	IKBKB
IL-15 Production	0	0.111	EPHA4,PRKCI
IL-15 Signaling	0	0.0667	PIK3C3
Virus Entry via Endocytic Pathways	0	0.125	AP2A1,PIK3C3,PRKCI
Mechanisms of Viral Exit from Host Cells	0	0.125	PRKCI
HIF1α Signaling	0	0.143	ADRA1B,HMOX1,HSPA2,MKNK1,PIK3C3,PRKCI
Melatonin Signaling	0	0.143	GNAI1,PRKCI
Neuropathic Pain Signaling In Dorsal Horn Neurons	0	0.143	PIK3C3,PRKCI
Relaxin Signaling	0	0.143	GNAI1,PIK3C3,SMARCC2
CNTF Signaling	0	0.0909	PIK3C3
Agrin Interactions at Neuromuscular Junction	0	0.0714	UTRN
Renin-Angiotensin Signaling	0	0.1	PIK3C3,PRKCI
Docosahexaenoic Acid (DHA) Signaling	0	0.143	PIK3C3
Semaphorin Signaling in Neurons	0	0.0909	ROCK2
CDK5 Signaling	0	0.0556	CACNA1A
HMGB1 Signaling	0	0.0385	PIK3C3
FLT3 Signaling in Hematopoietic Progenitor Cells	0	0.15	ATF4,GAB2,PIK3C3
Polyamine Regulation in Colon Cancer	0	0.0625	STIM1
Cholecystokinin/Gastrin-mediated Signaling	0	0.13	EPHA4,PRKCI,ROCK2
Human Embryonic Stem Cell Pluripotency	0	0.14	FZD4,ID2,PIK3C3,PRKCI,SMAD6,WNT2B
Melanocyte Development and Pigmentation Signaling	0	0.0952	ATF4,PIK3C3
DNA Methylation and Transcriptional Repression Signaling	0	0.0357	ZEB1
ATM Signaling	0	0.0588	ATF4,ZEB1
Role of OCT4 in Mammalian Embryonic Stem Cell Pluripotency	0	0.0625	PHC3
Germ Cell-Sertoli Cell Junction Signaling	0	0.0323	PIK3C3
Prolactin Signaling	0	0.143	PIK3C3,PRKCI,SOCS2
Melanoma Signaling	0	0.0833	PIK3C3
Type I Diabetes Mellitus Signaling	0	0.0952	IKBKB,SOCS2
Glioma Signaling	0	0.114	HDAC7,HDAC9,PIK3C3,PRKCI
Acute Myeloid Leukemia Signaling	0	0.0667	PIK3C3
Thyroid Cancer Signaling	0	0.0769	PIK3C3
Bladder Cancer Signaling	0	0.103	FGF7,HDAC7,HDAC9
Production of Nitric Oxide and Reactive Oxygen Species in Macrophages	0	0.103	IKBKB,PIK3C3,PPARA,PRKCI
Gα12/13 Signaling	0	0.13	IKBKB,PIK3C3,ROCK2
p70S6K Signaling	0	0.115	GNAI1,PIK3C3,PRKCI
Colorectal Cancer Metastasis Signaling	0	0.12	FZD4,GNAI1,LRP1,LRP5,PIK3C3,WNT2B
mTOR Signaling	0	0.0909	HMOX1,PIK3C3,PLD3,PRKCI
MYC Mediated Apoptosis Signaling	0	0.0833	IKBKB
Pancreatic Adenocarcinoma Signaling	0	0.128	CDKN1B,HDAC7,HDAC9,HMOX1,PIK3C3,PLD3
G Protein Signaling Mediated by Tubby	0	0.0909	GNAI1
Sphingosine-1-phosphate Signaling	0	0.125	GNAI1,PIK3C3
Crosstalk between Dendritic Cells and Natural Killer Cells	0	0.111	LTBR
Systemic Lupus Erythematosus Signaling	0	0.0333	PIK3C3
ILK Signaling	0	0.0833	ATF4,DOCK1,PIK3C3
EIF2 Signaling	0	0.0714	ATF4,PIK3C3,WARS1
April Mediated Signaling	0	0.111	IKBKB
PAK Signaling	0	0.111	ITGA11,PIK3C3
Hereditary Breast Cancer Signaling	0	0.0727	HDAC7,HDAC9,PIK3C3,SMARCC2
RAC Signaling	0	0.138	ARPC1B,ITGA11,PIK3C3,PRKCI
Ovarian Cancer Signaling	0	0.116	FZD4,HDAC7,HDAC9,PIK3C3,WNT2B
HER-2 Signaling in Breast Cancer	0	0.128	CDKN1B,ELF1,FOXO3,IKBKB,PIK3C3,PRKCI
Protein Kinase A Signaling	0	0.119	ATF4,GNAI1,PRKCI,PTCH1,PTPRB,PTPRM,PTPRS,ROCK2
Regulation of eIF4 and p70S6K Signaling	0	0.0882	ITGA11,MKNK1,PIK3C3
Leptin Signaling in Obesity	0	0.111	PIK3C3
RANK Signaling in Osteoclasts	0	0.118	IKBKB,PIK3C3
Glioblastoma Multiforme Signaling	0	0.105	CDKN1B,FZD4,PIK3C3,WNT2B
Regulation of IL-2 Expression in Activated and Anergic T Lymphocytes	0	0.0435	IKBKB
Granzyme A Signaling	0	0.0526	MT-ND4L
TNFR1 Signaling	0	0.143	IKBKB
Antiproliferative Role of TOB in T Cell Signaling	0	0.0588	CDKN1B
Inhibition of Angiogenesis by TSP1	0	0.0909	CD36
Cyclins and Cell Cycle Regulation	0	0.0857	CDKN1B,HDAC7,HDAC9
Assembly of RNA Polymerase II Complex	0	0.1	TAF1
Role of Tissue Factor in Cancer	0	0.0667	F10,PIK3C3
Role of IL-17A in Arthritis	0	0.0714	PIK3C3
IL-17A Signaling in Fibroblasts	0	0.111	IKBKB
Role of IL-17F in Allergic Inflammatory Airway Diseases	0	0.1	ATF4
Role of JAK family kinases in IL-6-type Cytokine Signaling	0	0.118	ADAM10,ADAM17
Role of JAK1 and JAK3 in γc Cytokine Signaling	0	0.1	PIK3C3
Sertoli Cell-Sertoli Cell Junction Signaling	0	0.103	ITGA11,MAGI2,PRKG1,SPTAN1
Telomerase Signaling	0	0.133	ELF1,HDAC7,HDAC9,PIK3C3
Mouse Embryonic Stem Cell Pluripotency	0	0.13	FZD4,ID2,PIK3C3
nNOS Signaling in Neurons	0	0.0909	PRKCI
Ephrin B Signaling	0	0.143	GNAI1,ROCK2
ERBB Signaling	0	0.118	PIK3C3,PRKCI
Estrogen-mediated S-phase Entry	0	0.0714	CDKN1B
GADD45 Signaling	0	0.0435	FOXO3
CDP-diacylglycerol Biosynthesis I	0	0.1	CDS2
Pyridoxal 5'-phosphate Salvage Pathway	0	0.105	DMPK,SGK1
Phosphatidylglycerol Biosynthesis II (Non-plastidic)	0	0.1	CDS2
3-phosphoinositide Degradation	0	0.15	ACP5,IGBP1,NUDT14,PPM1H,PPP1R12B,PTPRM
Salvage Pathways of Pyrimidine Ribonucleotides	0	0.0909	DMPK,SGK1
DNA damage-induced 14-3-3σ Signaling	0	0.0556	CDKN1B
Epithelial Adherens Junction Signaling	0	0.15	ARHGAP35,ARPC1B,LATS2,MAGI2,RAPGEF1,ROCK2
Regulation of Cellular Mechanics by Calpain Protease	0	0.111	CDKN1B,ITGA11
Remodeling of Epithelial Adherens Junctions	0	0.111	ARPC1B
Agranulocyte Adhesion and Diapedesis	0	0.0833	GNAI1
Granulocyte Adhesion and Diapedesis	0	0.0714	GNAI1
Role of p14/p19ARF in Tumor Suppression	0	0.125	PIK3C3
UVA-Induced MAPK Signaling	0	0.0435	PIK3C3
UVC-Induced MAPK Signaling	0	0.0714	PRKCI
Vitamin-C Transport	0	0.143	STOM
STAT3 Pathway	0	0.0417	SOCS2
Oxidative Phosphorylation	0	0.1	MT-ND4L,UQCR11
Adipogenesis pathway	0	0.143	BMAL1,FZD4,HDAC7,HDAC9,KLF5
HIPPO signaling	0	0.0588	LATS2
WNT/Ca+ pathway	0	0.133	ATF4,FZD4
Estrogen Receptor Signaling	0	0.131	ATF4,CACNA1A,CACNB1,FOXO3,GNAI1,MT-ND4L,PIK3C3,PPP1R12B,PRKCI,ROCK2,ZDHHC7
EGF Signaling	0	0.0625	PIK3C3
Cell Cycle: G1/S Checkpoint Regulation	0	0.0909	CDKN1B,HDAC7,HDAC9
Protein Ubiquitination Pathway	0	0.136	DNAJB2,HSPA2,PAN2,PSMA5,UBE2B,UBE3B,USP25,USP53
IL-2 Signaling	0	0.0909	PIK3C3
Amyloid Processing	0	0.125	PSEN1
JAK/STAT Signaling	0	0.1	PIK3C3,SOCS2
IL-4 Signaling	0	0.132	ATF4,GAB1,GNAI1,NFIL3,PIK3C3
WNT/β-catenin Signaling	0	0.132	FZD4,LRP1,LRP5,SOX6,WNT2B
Chemokine Signaling	0	0.143	GNAI1,PPP1R12B,ROCK2
Sonic Hedgehog Signaling	0	0.143	PTCH1
Death Receptor Signaling	0	0.1	IKBKB,SPTAN1
PPAR Signaling	0	0.0952	IKBKB,PPARA
Dopamine Receptor Signaling	0	0.0769	COMT
Glutamate Receptor Signaling	0	0.125	SLC1A1
TGF-β Signaling	0	0.105	INHBB,SMAD6
Apoptosis Signaling	0	0.0769	IKBKB,SPTAN1
VEGF Signaling	0	0.12	FOXO3,PIK3C3,ROCK2
Hypoxia Signaling in the Cardiovascular System	0	0.125	ATF4,UBE2B
T Cell Receptor Signaling	0	0.125	CDKN1B,FOXO3,IKBKB,PIK3C3
IL-6 Signaling	0	0.0833	IKBKB,PIK3C3
PDGF Signaling	0	0.05	PIK3C3
BMP signaling pathway	0	0.0714	SMAD6
Phagosome Maturation	0	0.136	ATP6V1A,CTSD,PIK3C3
Autophagy	0	0.111	ATF4,CDKN1B,FOXO3,MAP1LC3B,PIK3C3
Macropinocytosis Signaling	0	0.133	PIK3C3,PRKCI
Cancer Drug Resistance By Drug Efflux	0	0.0833	FOXO3
Sumoylation Pathway	0	0.0667	ZEB1,ZNF217
Th1 and Th2 Activation Pathway	0	0.143	NFIL3,PIK3C3,PSEN1
Th2 Pathway	0	0.143	PIK3C3,PSEN1
Osteoarthritis Pathway	0	0.14	ATF4,FOXO3,FZD4,ITGA11,LRP1,PTCH1,SMAD6
Sirtuin Signaling Pathway	0	0.113	ADAM10,BMAL1,CPT1B,FOXO3,MAP1LC3B,MT-ND4L,NR1H2,PPARA
Adrenomedullin signaling pathway	0	0.148	C3,PIK3C3,PRKG1,SMARCC2
Th17 Activation Pathway	0	0.111	IRAK4
SPINK1 General Cancer Pathway	0	0.1	PIK3C3
Apelin Endothelial Signaling Pathway	0	0.13	GNAI1,PIK3C3,PRKCI
Apelin Muscle Signaling Pathway	0	0.143	GNAI1
BAG2 Signaling Pathway	0	0.0952	HSPA2,PSMA5
PFKFB4 Signaling Pathway	0	0.0667	ATF4
T Cell Exhaustion Signaling Pathway	0	0.0357	PIK3C3
Systemic Lupus Erythematosus In T Cell Signaling Pathway	0	0.146	ATF4,ELF1,GNAI1,PIK3C3,ROCK2,STIM1
Senescence Pathway	0	0.116	CACNA1A,CACNB1,CDKN1B,DHCR24,ELF1,FOXO3,IKBKB,PIK3C3,SMAD6,STING1
Inhibition of ARE-Mediated mRNA Degradation Pathway	0	0.0526	PSMA5,TNFSF18
HOTAIR Regulatory Pathway	0	0.143	PIK3C3,ROCK2,STK38,WNT2B
Necroptosis Signaling Pathway	0	0.114	IKBKB,PLA2G4C,PLA2G6,TNIP1
Insulin Secretion Signaling Pathway	0	0.15	ATF4,CACNA1A,CACNB1,KLF11,PIK3C3,PRKCI
Coronavirus Replication Pathway	0	0.111	COPZ1
Tumor Microenvironment Pathway	0	0.0857	FGF7,FOXO3,PIK3C3
MSP-RON Signaling In Cancer Cells Pathway	0	0.125	ATF4,ELF1,PIK3C3
GM-CSF Signaling	0	0.0625	PIK3C3

## Sheet: Results phase advance in old
Filtering criteria: CircaCompare Phase difference q < 0.05, phase difference (old – young) < 0
Ingenuity Canonical Pathways	-log(Enrichment p-value)	Fraction of pathway covered	Molecules
EIF2 Signaling	5.35	0.238	ACTB,EIF3I,EIF3K,HNRNPA1,MAPK1,RPL7L1,RPS15A,RPS2,RPS27,RPS7
mTOR Signaling	3.49	0.182	EIF3I,EIF3K,MAPK1,PRKD3,RPS15A,RPS2,RPS27,RPS7
Regulation of eIF4 and p70S6K Signaling	3.46	0.206	EIF3I,EIF3K,MAPK1,RPS15A,RPS2,RPS27,RPS7
Mechanisms of Viral Exit from Host Cells	2.49	0.375	ACTB,PRKD3,SH3GLB2
Androgen Signaling	2.24	0.172	CALM1 (includes others),MAPK1,PRKD3,TAF1,TAF15
TCA Cycle II (Eukaryotic)	2.02	0.5	SDHB,SUCLG1
Corticotropin Releasing Hormone Signaling	1.95	0.182	CALM1 (includes others),CREB3L4,MAPK1,PRKD3
Synaptic Long Term Potentiation	1.89	0.174	CALM1 (includes others),CREB3L4,MAPK1,PRKD3
VEGF Signaling	1.76	0.16	ACTB,BCL2L1,MAPK1,YWHAE
Melatonin Signaling	1.76	0.214	CALM1 (includes others),MAPK1,PRKD3
CCR5 Signaling in Macrophages	1.67	0.2	CALM1 (includes others),MAPK1,PRKD3
Telomere Extension by Telomerase	1.65	0.333	HNRNPA1,XRCC6
α-Adrenergic Signaling	1.6	0.188	CALM1 (includes others),MAPK1,PRKD3
Coronavirus Pathogenesis Pathway	1.6	0.107	MAPK1,RN7SL1,RPS15A,RPS2,RPS27,RPS7
GM-CSF Signaling	1.6	0.188	BCL2L1,CISH,MAPK1
NRF2-mediated Oxidative Stress Response	1.49	0.114	ACTB,DNAJB2,ERP29,MAPK1,PRKD3
GNRH Signaling	1.49	0.133	CALM1 (includes others),CREB3L4,MAPK1,PRKD3
ERK5 Signaling	1.46	0.167	CREB3L4,WNK1,YWHAE
Oxytocin In Brain Signaling Pathway	1.45	0.129	CALM1 (includes others),CREB3L4,MAPK1,PRKD3
Gαq Signaling	1.45	0.129	ADRA1D,CALM1 (includes others),MAPK1,PRKD3
Huntington's Disease Signaling	1.4	0.0968	BCL2L1,CREB3L4,MAPK1,PRKD3,PSMB3,SDHB
NUR77 Signaling in T Lymphocytes	1.4	0.158	CALM1 (includes others),MAPK1,PRKD3
Flavin Biosynthesis IV (Mammalian)	1.39	1	RFK
B Cell Receptor Signaling	1.36	0.121	BCL2L1,CALM1 (includes others),CREB3L4,MAPK1
Calcium Signaling	1.36	0.121	CALM1 (includes others),CREB3L4,MAPK1,TPM4
P2Y Purigenic Receptor Signaling Pathway	1.34	0.15	CREB3L4,MAPK1,PRKD3
JAK/STAT Signaling	1.34	0.15	BCL2L1,CISH,MAPK1
Leukocyte Extravasation Signaling	1.32	0.118	ACTB,CD99,MAPK1,PRKD3
White Adipose Tissue Browning Pathway	1.28	0.143	CREB3L4,FOXC2,MAPK1
Protein Kinase A Signaling	1.26	0.0896	CALM1 (includes others),CREB3L4,H1-10,MAPK1,PRKD3,YWHAE
14-3-3-mediated Signaling	1.23	0.136	MAPK1,PRKD3,YWHAE
fMLP Signaling in Neutrophils	1.23	0.136	CALM1 (includes others),MAPK1,PRKD3
AMPK Signaling	1.23	0.0962	ACTB,ADRA1D,AK2,CREB3L4,MAPK1
Assembly of RNA Polymerase II Complex	1.22	0.2	TAF1,TAF15
Role of IL-17F in Allergic Inflammatory Airway Diseases	1.22	0.2	CREB3L4,MAPK1
Fcγ Receptor-mediated Phagocytosis in Macrophages and Monocytes	1.19	0.13	ACTB,MAPK1,PRKD3
Apelin Endothelial Signaling Pathway	1.19	0.13	CALM1 (includes others),MAPK1,PRKD3
Inhibition of ARE-Mediated mRNA Degradation Pathway	1.17	0.105	MAPK1,PSMB3,YWHAE,ZFP36L2
Sirtuin Signaling Pathway	1.16	0.0845	H1-10,MAPK1,PPIF,SDHB,TOMM22,XRCC6
Calcium-induced T Lymphocyte Apoptosis	1.14	0.182	CALM1 (includes others),PRKD3
Lymphotoxin β Receptor Signaling	1.14	0.182	BCL2L1,MAPK1
nNOS Signaling in Neurons	1.14	0.182	CALM1 (includes others),PRKD3
UVB-Induced MAPK Signaling	1.14	0.182	MAPK1,PRKD3
Nitric Oxide Signaling in the Cardiovascular System	1.14	0.125	CALM1 (includes others),MAPK1,PRKD3
MSP-RON Signaling In Cancer Cells Pathway	1.14	0.125	CREB3L4,MAPK1,YWHAE
Sertoli Cell-Sertoli Cell Junction Signaling	1.14	0.103	ACTB,EPN1,MAPK1,YBX3
CLEAR Signaling Pathway	1.11	0.0893	CREB3L4,MAPK1,PRKD3,RRAGA,YWHAE
Phosphatidylethanolamine Biosynthesis II	1.1	0.5	PCYT2
Thioredoxin Pathway	1.1	0.5	SELENOT
NF-κB Activation by Viruses	1.08	0.167	MAPK1,PRKD3
iNOS Signaling	1.08	0.167	CALM1 (includes others),MAPK1
Gαs Signaling	1.08	0.167	CREB3L4,MAPK1
Agranulocyte Adhesion and Diapedesis	1.08	0.167	ACTB,CD99
CCR3 Signaling in Eosinophils	1.06	0.115	CALM1 (includes others),MAPK1,PRKD3
p70S6K Signaling	1.06	0.115	MAPK1,PRKD3,YWHAE
Apoptosis Signaling	1.06	0.115	ACIN1,BCL2L1,MAPK1
GP6 Signaling Pathway	1.06	0.115	CALM1 (includes others),COL5A2,PRKD3
Erythropoietin Signaling Pathway	1.02	0.111	BCL2L1,MAPK1,PRKD3
Opioid Signaling Pathway	1.01	0.093	CALM1 (includes others),CREB3L4,MAPK1,PRKD3
Systemic Lupus Erythematosus In B Cell Signaling Pathway	0.987	0.0909	BCL2L1,CALM1 (includes others),MAPK1,PRKD3
Hepatic Fibrosis Signaling Pathway	0.971	0.075	CALM1 (includes others),CREB3L4,MAPK1,PRKD3,SDHB,ZNF875
Neuropathic Pain Signaling In Dorsal Horn Neurons	0.959	0.143	MAPK1,PRKD3
Agrin Interactions at Neuromuscular Junction	0.959	0.143	ACTB,MAPK1
ERBB4 Signaling	0.959	0.143	MAPK1,PRKD3
Stearate Biosynthesis I (Animals)	0.959	0.143	ACOT1,OSGEPL1
UVC-Induced MAPK Signaling	0.959	0.143	MAPK1,PRKD3
Autophagy	0.959	0.0889	CALM1 (includes others),CREB3L4,MAPK1,WIPI2
cAMP-mediated signaling	0.947	0.103	CALM1 (includes others),CREB3L4,MAPK1
Acyl-CoA Hydrolysis	0.928	0.333	ACOT1
Parkinson's Signaling	0.928	0.333	MAPK1
Glucocorticoid Receptor Signaling	0.914	0.0686	ACTB,BCL2L1,MAPK1,SDHB,TAF1,TAF15,TFB1M
Systemic Lupus Erythematosus Signaling	0.914	0.1	LSM8,MAPK1,PRPF8
Gap Junction Signaling	0.914	0.1	ACTB,MAPK1,PRKD3
Thrombopoietin Signaling	0.91	0.133	MAPK1,PRKD3
IL-15 Signaling	0.91	0.133	BCL2L1,MAPK1
Cellular Effects of Sildenafil (Viagra)	0.91	0.133	ACTB,CALM1 (includes others)
PFKFB4 Signaling Pathway	0.91	0.133	CREB3L4,MAPK1
Phospholipase C Signaling	0.907	0.0851	CALM1 (includes others),CREB3L4,MAPK1,PRKD3
Germ Cell-Sertoli Cell Junction Signaling	0.883	0.0968	ACTB,EPN1,MAPK1
CREB Signaling in Neurons	0.883	0.0758	ADRA1D,CALM1 (includes others),CREB3L4,MAPK1,PRKD3
Dopamine-DARPP32 Feedback in cAMP Signaling	0.883	0.0968	CALM1 (includes others),CREB3L4,PRKD3
Growth Hormone Signaling	0.863	0.125	MAPK1,PRKD3
VEGF Family Ligand-Receptor Interactions	0.863	0.125	MAPK1,PRKD3
MSP-RON Signaling In Macrophages Pathway	0.863	0.125	CREB3L4,MAPK1
Aldosterone Signaling in Epithelial Cells	0.851	0.0938	DNAJB2,MAPK1,PRKD3
Oxytocin Signaling Pathway	0.836	0.08	CALM1 (includes others),CREB3L4,MAPK1,PRKD3
RANK Signaling in Osteoclasts	0.818	0.118	CALM1 (includes others),MAPK1
Paxillin Signaling	0.818	0.118	ACTB,MAPK1
ERBB Signaling	0.818	0.118	MAPK1,PRKD3
Apelin Cardiomyocyte Signaling Pathway	0.818	0.118	MAPK1,PRKD3
MSP-RON Signaling Pathway	0.812	0.25	ACTB
Role of JAK family kinases in IL-6-type Cytokine Signaling	0.812	0.25	MAPK1
Neurotrophin/TRK Signaling	0.78	0.111	CREB3L4,MAPK1
Glioma Signaling	0.767	0.0857	CALM1 (includes others),MAPK1,PRKD3
Dilated Cardiomyopathy Signaling Pathway	0.742	0.105	ACTB,MAPK1
IL-13 Signaling Pathway	0.742	0.105	BCL2L1,MAPK1
IL-3 Signaling	0.742	0.105	MAPK1,PRKD3
ILK Signaling	0.742	0.0833	ACTB,CREB3L4,MAPK1
Estrogen-Dependent Breast Cancer Signaling	0.742	0.105	CREB3L4,MAPK1
Role of NFAT in Cardiac Hypertrophy	0.742	0.0833	CALM1 (includes others),MAPK1,PRKD3
Granzyme A Signaling	0.742	0.105	H1-10,XRCC6
Pyridoxal 5'-phosphate Salvage Pathway	0.742	0.105	MAPK1,POMK
IL-22 Signaling	0.724	0.2	MAPK1
DNA Double-Strand Break Repair by Non-Homologous End Joining	0.724	0.2	XRCC6
PI3K/AKT Signaling	0.719	0.0811	BCL2L1,MAPK1,YWHAE
Fc Epsilon RI Signaling	0.708	0.1	MAPK1,PRKD3
LPS-stimulated MAPK Signaling	0.708	0.1	MAPK1,PRKD3
Renin-Angiotensin Signaling	0.708	0.1	MAPK1,PRKD3
FLT3 Signaling in Hematopoietic Progenitor Cells	0.708	0.1	CREB3L4,MAPK1
G Beta Gamma Signaling	0.708	0.1	MAPK1,PRKD3
Death Receptor Signaling	0.708	0.1	ACIN1,ACTB
Clathrin-mediated Endocytosis Signaling	0.695	0.0789	ACTB,EPN1,SH3GLB2
Cardiac Hypertrophy Signaling	0.695	0.0789	ADRA1D,CALM1 (includes others),MAPK1
Role Of Osteoclasts In Rheumatoid Arthritis Signaling Pathway	0.693	0.0702	CALM1 (includes others),COL5A2,CREB3L4,MAPK1
Role of Pattern Recognition Receptors in Recognition of Bacteria and Viruses	0.676	0.0952	MAPK1,PRKD3
Melanocyte Development and Pigmentation Signaling	0.676	0.0952	CREB3L4,MAPK1
Prolactin Signaling	0.676	0.0952	MAPK1,PRKD3
Antioxidant Action of Vitamin C	0.676	0.0952	MAPK1,SELENOT
PEDF Signaling	0.676	0.0952	BCL2L1,MAPK1
FGF Signaling	0.676	0.0952	CREB3L4,MAPK1
Chemokine Signaling	0.676	0.0952	CALM1 (includes others),MAPK1
BAG2 Signaling Pathway	0.676	0.0952	MAPK1,PSMB3
TREM1 Signaling	0.654	0.167	MAPK1
IL-9 Signaling	0.654	0.167	CISH
Assembly of RNA Polymerase III Complex	0.654	0.167	GTF3A
IL-17A Signaling in Gastric Cells	0.654	0.167	MAPK1
Transcriptional Regulatory Network in Embryonic Stem Cells	0.654	0.167	SKIL
nNOS Signaling in Skeletal Muscle Cells	0.654	0.167	CALM1 (includes others)
Sonic Hedgehog Signaling	0.654	0.167	ZNF875
Complement System	0.654	0.167	C1S
Insulin Secretion Signaling Pathway	0.65	0.075	CREB3L4,MAPK1,PRKD3
IL-12 Signaling and Production in Macrophages	0.644	0.0909	MAPK1,PRKD3
Virus Entry via Endocytic Pathways	0.644	0.0909	ACTB,PRKD3
Salvage Pathways of Pyrimidine Ribonucleotides	0.644	0.0909	MAPK1,POMK
Iron homeostasis signaling pathway	0.644	0.0909	IREB2,MAPK1
Cholecystokinin/Gastrin-mediated Signaling	0.616	0.087	MAPK1,PRKD3
Regulation of IL-2 Expression in Activated and Anergic T Lymphocytes	0.616	0.087	CALM1 (includes others),MAPK1
UVA-Induced MAPK Signaling	0.616	0.087	BCL2L1,MAPK1
RAR Activation	0.609	0.0714	ACTB,MAPK1,PRKD3
Docosahexaenoic Acid (DHA) Signaling	0.595	0.143	BCL2L1
Neuroprotective Role of THOP1 in Alzheimer's Disease	0.595	0.143	YWHAE
Vitamin-C Transport	0.595	0.143	SELENOT
Role of NFAT in Regulation of the Immune Response	0.588	0.0833	CALM1 (includes others),MAPK1
eNOS Signaling	0.588	0.0833	CALM1 (includes others),PRKD3
STAT3 Pathway	0.588	0.0833	CISH,MAPK1
IGF-1 Signaling	0.588	0.0833	MAPK1,YWHAE
Estrogen Receptor Signaling	0.587	0.0595	CREB3L4,GPS2,MAPK1,PRKD3,SDHB
Neuregulin Signaling	0.564	0.08	MAPK1,PRKD3
CXCR4 Signaling	0.564	0.08	MAPK1,PRKD3
Dendritic Cell Maturation	0.564	0.08	CREB3L4,MAPK1
TEC Kinase Signaling	0.564	0.08	ACTB,PRKD3
Endocannabinoid Developing Neuron Pathway	0.564	0.08	CREB3L4,MAPK1
IL-8 Signaling	0.554	0.0667	BCL2L1,MAPK1,PRKD3
Oncostatin M Signaling	0.545	0.125	MAPK1
MIF-mediated Glucocorticoid Regulation	0.545	0.125	MAPK1
Amyloid Processing	0.545	0.125	MAPK1
Glutamate Receptor Signaling	0.545	0.125	CALM1 (includes others)
SPINK1 Pancreatic Cancer Pathway	0.545	0.125	CPQ
PI3K Signaling in B Lymphocytes	0.541	0.0769	CALM1 (includes others),MAPK1
Xenobiotic Metabolism General Signaling Pathway	0.541	0.0769	MAPK1,PRKD3
Circadian Rhythm Signaling	0.536	0.0652	CREB3L4,MAPK1,PRKD3
Role of Macrophages, Fibroblasts and Endothelial Cells in Rheumatoid Arthritis	0.519	0.0588	CALM1 (includes others),CREB3L4,MAPK1,PRKD3
Type II Diabetes Mellitus Signaling	0.517	0.0741	MAPK1,PRKD3
PTEN Signaling	0.517	0.0741	BCL2L1,MAPK1
Adrenomedullin signaling pathway	0.517	0.0741	CALM1 (includes others),MAPK1
4-1BB Signaling in T Lymphocytes	0.503	0.111	MAPK1
B Cell Activating Factor Signaling	0.503	0.111	MAPK1
Crosstalk between Dendritic Cells and Natural Killer Cells	0.503	0.111	ACTB
April Mediated Signaling	0.503	0.111	MAPK1
Leptin Signaling in Obesity	0.503	0.111	MAPK1
Role of PI3K/AKT Signaling in the Pathogenesis of Influenza	0.503	0.111	MAPK1
IL-17A Signaling in Fibroblasts	0.503	0.111	MAPK1
Remodeling of Epithelial Adherens Junctions	0.503	0.111	ACTB
GPCR-Mediated Nutrient Sensing in Enteroendocrine Cells	0.503	0.111	PRKD3
Coronavirus Replication Pathway	0.503	0.111	HNRNPA1
NGF Signaling	0.496	0.0714	CREB3L4,MAPK1
Synaptic Long Term Depression	0.476	0.069	MAPK1,PRKD3
HGF Signaling	0.476	0.069	MAPK1,PRKD3
MIF Regulation of Innate Immunity	0.466	0.1	MAPK1
OX40 Signaling Pathway	0.466	0.1	BCL2L1
IL-17A Signaling in Airway Cells	0.466	0.1	MAPK1
Role of JAK1 and JAK3 in γc Cytokine Signaling	0.466	0.1	MAPK1
SPINK1 General Cancer Pathway	0.466	0.1	MAPK1
Acute Phase Response Signaling	0.456	0.0667	C1S,MAPK1
Factors Promoting Cardiogenesis in Vertebrates	0.456	0.0667	CREB3L4,PRKD3
Role of Tissue Factor in Cancer	0.456	0.0667	BCL2L1,MAPK1
Synaptogenesis Signaling Pathway	0.445	0.0577	CALM1 (includes others),CREB3L4,MAPK1
CNTF Signaling	0.433	0.0909	MAPK1
Semaphorin Signaling in Neurons	0.433	0.0909	MAPK1
Inhibition of Angiogenesis by TSP1	0.433	0.0909	MAPK1
ERB2-ERBB3 Signaling	0.433	0.0909	MAPK1
tRNA Charging	0.433	0.0909	PARS2
IL-2 Signaling	0.433	0.0909	MAPK1
FAT10 Signaling Pathway	0.433	0.0909	PSMB3
Endothelin-1 Signaling	0.42	0.0625	MAPK1,PRKD3
T Cell Receptor Signaling	0.42	0.0625	CALM1 (includes others),MAPK1
Xenobiotic Metabolism CAR Signaling Pathway	0.42	0.0625	MAPK1,PRKD3
Ribonucleotide Reductase Signaling Pathway	0.418	0.0556	ACTB,CREB3L4,MAPK1
Prostate Cancer Signaling	0.405	0.0606	CREB3L4,MAPK1
Ferroptosis Signaling Pathway	0.405	0.0606	IREB2,MAPK1
SNARE Signaling Pathway	0.403	0.0833	CALM1 (includes others)
VDR/RXR Activation	0.403	0.0833	PRKD3
CD27 Signaling in Lymphocytes	0.403	0.0833	BCL2L1
Melanoma Signaling	0.403	0.0833	MAPK1
MYC Mediated Apoptosis Signaling	0.403	0.0833	BCL2L1
Triacylglycerol Biosynthesis	0.403	0.0833	OSGEPL1
Cancer Drug Resistance By Drug Efflux	0.403	0.0833	MAPK1
Apelin Adipocyte Signaling Pathway	0.403	0.0833	MAPK1
Chronic Myeloid Leukemia Signaling	0.388	0.0588	BCL2L1,MAPK1
Kinetochore Metaphase Signaling Pathway	0.388	0.0588	ARPP19,BOD1
Caveolar-mediated Endocytosis Signaling	0.377	0.0769	ACTB
Antiproliferative Role of Somatostatin Receptor 2	0.377	0.0769	MAPK1
Endometrial Cancer Signaling	0.377	0.0769	MAPK1
Thyroid Cancer Signaling	0.377	0.0769	MAPK1
Glioma Invasiveness Signaling	0.377	0.0769	MAPK1
CTLA4 Signaling in Cytotoxic T Lymphocytes	0.374	0.0571	BCL2L1,MAPK1
Sperm Motility	0.374	0.0571	CALM1 (includes others),PRKD3
Endocannabinoid Cancer Inhibition Pathway	0.374	0.0571	CREB3L4,MAPK1
Necroptosis Signaling Pathway	0.374	0.0571	PPIF,TOMM22
Axonal Guidance Signaling	0.371	0.0494	MAPK1,PRKD3,RTN4,ZNF875
Breast Cancer Regulation by Stathmin1	0.371	0.0494	ADRA1D,CREB3L4,MAPK1,PRKD3
G-Protein Coupled Receptor Signaling	0.362	0.0488	ADRA1D,CALM1 (includes others),CREB3L4,MAPK1
Thrombin Signaling	0.359	0.0556	MAPK1,PRKD3
IL-10 Signaling	0.353	0.0714	MAPK1
Role of IL-17A in Arthritis	0.353	0.0714	MAPK1
Ephrin B Signaling	0.353	0.0714	MAPK1
GDNF Family Ligand-Receptor Interactions	0.353	0.0714	MAPK1
Granulocyte Adhesion and Diapedesis	0.353	0.0714	CD99
Toll-like Receptor Signaling	0.353	0.0714	MAPK1
BMP signaling pathway	0.353	0.0714	MAPK1
Cardiac Hypertrophy Signaling (Enhanced)	0.353	0.0482	ADRA1D,CALM1 (includes others),MAPK1,PRKD3
CD40 Signaling	0.331	0.0667	MAPK1
Induction of Apoptosis by HIV1	0.331	0.0667	BCL2L1
Basal Cell Carcinoma Signaling	0.331	0.0667	ZNF875
Acute Myeloid Leukemia Signaling	0.331	0.0667	MAPK1
WNT/Ca+ pathway	0.331	0.0667	CREB3L4
Macropinocytosis Signaling	0.331	0.0667	PRKD3
IL-7 Signaling Pathway	0.331	0.0667	MAPK1
Actin Cytoskeleton Signaling	0.32	0.0513	ACTB,MAPK1
Tight Junction Signaling	0.32	0.0513	ACTB,YBX3
Production of Nitric Oxide and Reactive Oxygen Species in Macrophages	0.32	0.0513	MAPK1,PRKD3
ICOS-ICOSL Signaling in T Helper Cells	0.311	0.0625	CALM1 (includes others)
Polyamine Regulation in Colon Cancer	0.311	0.0625	MAPK1
Role of OCT4 in Mammalian Embryonic Stem Cell Pluripotency	0.311	0.0625	PHC3
Sphingosine-1-phosphate Signaling	0.311	0.0625	MAPK1
EGF Signaling	0.311	0.0625	MAPK1
Hypoxia Signaling in the Cardiovascular System	0.311	0.0625	CREB3L4
PD-1, PD-L1 cancer immunotherapy pathway	0.311	0.0625	BCL2L1
Endocannabinoid Neuronal Synapse Pathway	0.311	0.0625	MAPK1
Pulmonary Healing Signaling Pathway	0.307	0.05	MAPK1,PRKD3
Pathogen Induced Cytokine Storm Signaling Pathway	0.307	0.05	COL5A2,MAPK1
Ephrin Receptor Signaling	0.307	0.05	CREB3L4,MAPK1
Systemic Lupus Erythematosus In T Cell Signaling Pathway	0.296	0.0488	CREB3L4,MAPK1
Regulation Of The Epithelial Mesenchymal Transition By Growth Factors Pathway	0.296	0.0488	FOXC2,MAPK1
TR/RXR Activation	0.292	0.0588	GPS2
IL-1 Signaling	0.292	0.0588	MAPK1
Antiproliferative Role of TOB in T Cell Signaling	0.292	0.0588	MAPK1
Spliceosomal Cycle	0.292	0.0588	PPIE
Gαi Signaling	0.292	0.0588	MAPK1
HIPPO signaling	0.292	0.0588	YWHAE
HIF1α Signaling	0.285	0.0476	MAPK1,PRKD3
Integrin Signaling	0.285	0.0476	ACTB,MAPK1
Pyroptosis Signaling Pathway	0.276	0.0556	MAPK1
Amyotrophic Lateral Sclerosis Signaling	0.276	0.0556	BCL2L1
Regulation of Actin-based Motility by Rho	0.276	0.0556	ACTB
CDK5 Signaling	0.276	0.0556	MAPK1
Renal Cell Carcinoma Signaling	0.276	0.0556	MAPK1
PAK Signaling	0.276	0.0556	MAPK1
Regulation of Cellular Mechanics by Calpain Protease	0.276	0.0556	MAPK1
Wound Healing Signaling Pathway	0.274	0.0465	COL5A2,MAPK1
Aryl Hydrocarbon Receptor Signaling	0.274	0.0465	MAPK1,NFIC
ERK/MAPK Signaling	0.274	0.0465	CREB3L4,MAPK1
Xenobiotic Metabolism Signaling	0.274	0.0465	MAPK1,PRKD3
CD28 Signaling in T Helper Cells	0.26	0.0526	CALM1 (includes others)
TGF-β Signaling	0.26	0.0526	MAPK1
Role of Osteoblasts, Osteoclasts and Chondrocytes in Rheumatoid Arthritis	0.254	0.0444	CALM1 (includes others),MAPK1
Signaling by Rho Family GTPases	0.254	0.0444	ACTB,MAPK1
PKCθ Signaling in T Lymphocytes	0.246	0.05	MAPK1
Oxidative Phosphorylation	0.246	0.05	SDHB
Cell Cycle: G2/M DNA Damage Checkpoint Regulation	0.246	0.05	YWHAE
PDGF Signaling	0.246	0.05	MAPK1
Pancreatic Adenocarcinoma Signaling	0.237	0.0426	BCL2L1,MAPK1
HER-2 Signaling in Breast Cancer	0.237	0.0426	MAPK1,PRKD3
Regulation of the Epithelial-Mesenchymal Transition Pathway	0.237	0.0426	FOXC2,MAPK1
Neuroinflammation Signaling Pathway	0.237	0.0426	CREB3L4,MAPK1
Relaxin Signaling	0.232	0.0476	MAPK1
Role of NANOG in Mammalian Embryonic Stem Cell Pluripotency	0.232	0.0476	MAPK1
Type I Diabetes Mellitus Signaling	0.232	0.0476	MAPK1
Role of MAPK Signaling in the Pathogenesis of Influenza	0.232	0.0476	MAPK1
PPAR Signaling	0.232	0.0476	MAPK1
Role of MAPK Signaling in Inhibiting the Pathogenesis of Influenza	0.232	0.0476	MAPK1
ID1 Signaling Pathway	0.228	0.0417	BCL2L1,MAPK1
BER (Base Excision Repair) Pathway	0.22	0.0455	MAPK1
Gα12/13 Signaling	0.208	0.0435	MAPK1
Mouse Embryonic Stem Cell Pluripotency	0.208	0.0435	MAPK1
GADD45 Signaling	0.208	0.0435	MAPK1
Insulin Receptor Signaling	0.208	0.0435	MAPK1
Regulation Of The Epithelial Mesenchymal Transition In Development Pathway	0.208	0.0435	ZNF875
Hepatic Cholestasis	0.197	0.0417	PRKD3
IL-17 Signaling	0.197	0.0417	MAPK1
CDC42 Signaling	0.197	0.0417	MAPK1
IL-6 Signaling	0.197	0.0417	MAPK1
Xenobiotic Metabolism PXR Signaling Pathway	0.197	0.0417	PRKD3
NAD Signaling Pathway	0	0.0345	H1-10
Neurovascular Coupling Signaling Pathway	0	0.0303	CALM1 (includes others)
Pulmonary Fibrosis Idiopathic Signaling Pathway	0	0.0366	ACTB,COL5A2,MAPK1
CDX Gastrointestinal Cancer Signaling Pathway	0	0.037	MAPK1
Macrophage Classical Activation Signaling Pathway	0	0.0357	SDHB
MicroRNA Biogenesis Signaling Pathway	0	0.04	HNRNPA1,MAPK1
Multiple Sclerosis Signaling Pathway	0	0.0333	MAPK1
Role Of Chondrocytes In Rheumatoid Arthritis Signaling Pathway	0	0.037	MAPK1
Role Of Osteoblasts In Rheumatoid Arthritis Signaling Pathway	0	0.0244	MAPK1
Natural Killer Cell Signaling	0	0.0345	MAPK1
PPARα/RXRα Activation	0	0.027	MAPK1
p53 Signaling	0	0.0323	BCL2L1
Hepatic Fibrosis / Hepatic Stellate Cell Activation	0	0.025	COL5A2
Mitochondrial Dysfunction	0	0.0357	SDHB
Role of BRCA1 in DNA Damage Response	0	0.0233	ACTB
Role of PKR in Interferon Induction and Antiviral Response	0	0.0294	MAPK1
Reelin Signaling in Neurons	0	0.0323	MAPK1
Molecular Mechanisms of Cancer	0	0.0278	BCL2L1,MAPK1,PRKD3
HMGB1 Signaling	0	0.0385	MAPK1
DNA Methylation and Transcriptional Repression Signaling	0	0.0357	GATAD2A
ATM Signaling	0	0.0294	CREB3L4
Small Cell Lung Cancer Signaling	0	0.0333	BCL2L1
Bladder Cancer Signaling	0	0.0345	MAPK1
Non-Small Cell Lung Cancer Signaling	0	0.04	MAPK1
Colorectal Cancer Metastasis Signaling	0	0.04	BCL2L1,MAPK1
FAK Signaling	0	0.0375	ADRA1D,ECM2,MAPK1
Hereditary Breast Cancer Signaling	0	0.0182	ACTB
RAC Signaling	0	0.0345	MAPK1
RHOA Signaling	0	0.0385	ACTB
Ovarian Cancer Signaling	0	0.0233	MAPK1
Glioblastoma Multiforme Signaling	0	0.0263	MAPK1
RHOGDI Signaling	0	0.0312	ACTB
Telomerase Signaling	0	0.0333	MAPK1
Epithelial Adherens Junction Signaling	0	0.025	YWHAE
Adipogenesis pathway	0	0.0286	FOXC2
Unfolded protein response	0	0.0385	DNAJB2
Protein Ubiquitination Pathway	0	0.0339	DNAJB2,PSMB3
p38 MAPK Signaling	0	0.0345	CREB3L4
Phagosome Formation	0	0.038	ADRA1D,MAPK1,PRKD3
Osteoarthritis Pathway	0	0.04	CREB3L4,ZNF875
T Cell Exhaustion Signaling Pathway	0	0.0357	MAPK1
Senescence Pathway	0	0.0233	CALM1 (includes others),MAPK1
Tumor Microenvironment Pathway	0	0.0286	MAPK1
Role of MAPK Signaling in Promoting the Pathogenesis of Influenza	0	0.0333	MAPK1

## Sheet: Results phase delay in old
Filtering criteria: CircaCompare Phase difference q < 0.05, phase difference (old – young) > 0
Ingenuity Canonical Pathways	-log(Enrichment p-value)	Fraction of pathway covered	Molecules
Assembly of RNA Polymerase II Complex	2.11	0.3	GTF2F1,POLR2C,TAF6L
Oxidative Phosphorylation	2.02	0.2	ATP5F1D,NDUFB7,UQCRB,UQCRC1
Circadian Rhythm Signaling	1.87	0.13	BHLHE41,CRY2,KRAS,NR1D1,NR1D2,PER3
Kinetochore Metaphase Signaling Pathway	1.84	0.147	ANAPC11,BIRC5,PPP1CA,PPP1CB,STAG2
Insulin Receptor Signaling	1.8	0.174	GAB1,KRAS,PPP1CA,PPP1CB
CTLA4 Signaling in Cytotoxic T Lymphocytes	1.79	0.143	AP2M1,ARF1,CLTA,KRAS,TGFB1
Dopamine Receptor Signaling	1.78	0.231	PPP1CA,PPP1CB,SPR
Mitochondrial Dysfunction	1.51	0.143	ATP5F1D,NDUFB7,UQCRB,UQCRC1
Androgen Signaling	1.46	0.138	GNA13,GTF2F1,POLR2C,TAF6L
TR/RXR Activation	1.46	0.176	HDAC3,NCOA6,THRA
Gαi Signaling	1.46	0.176	ADORA1,GNA13,KRAS
HIPPO signaling	1.46	0.176	MOB1A,PPP1CA,PPP1CB
CDK5 Signaling	1.39	0.167	KRAS,PPP1CA,PPP1CB
Renal Cell Carcinoma Signaling	1.39	0.167	GAB1,KRAS,TGFB1
ERK5 Signaling	1.39	0.167	GAB1,GNA13,KRAS
Eumelanin Biosynthesis	1.36	1	MIF
Tetrahydrobiopterin Biosynthesis I	1.36	1	SPR
Tetrahydrobiopterin Biosynthesis II	1.36	1	SPR
S-adenosyl-L-methionine Biosynthesis	1.36	1	MAT2A
Endothelin-1 Signaling	1.32	0.125	GAB1,GNA13,KRAS,PNPLA8
Virus Entry via Endocytic Pathways	1.17	0.136	AP2M1,CLTA,KRAS
Glucocorticoid Receptor Signaling	1.13	0.0784	ATP5F1D,GTF2F1,KRAS,KRT10,NDUFB7,POLR2C,TAF6L,TGFB1
Synaptic Long Term Potentiation	1.12	0.13	KRAS,PPP1CA,PPP1CB
Mitotic Roles of Polo-Like Kinase	1.08	0.125	ANAPC11,STAG2,TGFB1
SAPK/JNK Signaling	1.08	0.125	GAB1,GNA13,KRAS
Cardiac β-adrenergic Signaling	1.08	0.125	GNA13,PPP1CA,PPP1CB
Valine Degradation I	1.07	0.5	BCAT1
Leucine Degradation I	1.07	0.5	BCAT1
Glycoaminoglycan-protein Linkage Region Biosynthesis	1.07	0.5	B3GALT6
Serotonin Receptor Signaling	1.07	0.5	SPR
Angiopoietin Signaling	1.03	0.167	BIRC5,KRAS
CCR3 Signaling in Eosinophils	0.996	0.115	GNA13,KRAS,PPP1CB
EIF2 Signaling	0.97	0.0952	ATF5,KRAS,PPP1CA,PPP1CB
Opioid Signaling Pathway	0.942	0.093	AP2M1,CLTA,GNA13,KRAS
GDNF Family Ligand-Receptor Interactions	0.916	0.143	GAB1,KRAS
GABA Receptor Signaling	0.916	0.143	AP2M1,GNA13
Th2 Pathway	0.916	0.143	BHLHE41,TGFB1
Role of Cytokines in Mediating Communication between Immune Cells	0.904	0.333	TGFB1
Synaptic Long Term Depression	0.888	0.103	GNA13,KRAS,PNPLA8
Huntington's Disease Signaling	0.886	0.0806	ATP5F1D,CLTA,HDAC3,POLR2C,PSMD9
Breast Cancer Regulation by Stathmin1	0.86	0.0741	ADORA1,GNA13,KRAS,PPP1CA,PPP1CB,TGFB1
Telomerase Signaling	0.856	0.1	HDAC3,KRAS,TERT
Role of MAPK Signaling in Promoting the Pathogenesis of Influenza	0.856	0.1	ATP6V1F,KRAS,PNPLA8
Pancreatic Adenocarcinoma Signaling	0.838	0.0851	BIRC5,HDAC3,KRAS,TGFB1
Phospholipase C Signaling	0.838	0.0851	GNA13,HDAC3,KRAS,PPP1CB
α-Adrenergic Signaling	0.82	0.125	GNA13,KRAS
Role of OCT4 in Mammalian Embryonic Stem Cell Pluripotency	0.82	0.125	AQR,NR2F6
Hypoxia Signaling in the Cardiovascular System	0.82	0.125	UBE2B,UBE2J2
Estrogen Receptor Signaling	0.807	0.0714	ATP5F1D,GNA13,HDAC3,KRAS,NDUFB7,PPP1CB
CREB Signaling in Neurons	0.804	0.0758	ADORA1,GNA13,KRAS,POLR2C,TGFB1
Airway Inflammation in Asthma	0.788	0.25	TGFB1
Isoleucine Degradation I	0.788	0.25	BCAT1
Methionine Degradation I (to Homocysteine)	0.788	0.25	MAT2A
Protein Kinase A Signaling	0.785	0.0746	ANAPC11,GNA13,PPP1CA,PPP1CB,TGFB1
Spliceosomal Cycle	0.777	0.118	AQR,SF1
Paxillin Signaling	0.777	0.118	ARF1,KRAS
Colorectal Cancer Metastasis Signaling	0.769	0.08	BIRC5,GNA13,KRAS,TGFB1
Neurovascular Coupling Signaling Pathway	0.767	0.0909	ADORA1,PNPLA8,PPP1CB
Chronic Myeloid Leukemia Signaling	0.74	0.0882	HDAC3,KRAS,TGFB1
Neurotrophin/TRK Signaling	0.738	0.111	GAB1,KRAS
Adipogenesis pathway	0.714	0.0857	HDAC3,NR1D1,TGFB1
Estrogen-Dependent Breast Cancer Signaling	0.702	0.105	KRAS,TERT
TGF-β Signaling	0.702	0.105	KRAS,TGFB1
Cysteine Biosynthesis III (mammalia)	0.7	0.2	MAT2A
Thrombin Signaling	0.69	0.0833	GNA13,KRAS,PPP1CB
Role of NFAT in Cardiac Hypertrophy	0.69	0.0833	HDAC3,KRAS,TGFB1
Fc Epsilon RI Signaling	0.668	0.1	GAB1,KRAS
G Beta Gamma Signaling	0.668	0.1	GNA13,KRAS
PPARα/RXRα Activation	0.666	0.0811	KRAS,NCOA6,TGFB1
D-myo-inositol (1,4,5,6)-Tetrakisphosphate Biosynthesis	0.666	0.0811	NUDT3,PPP1CA,PPP1CB
D-myo-inositol (3,4,5,6)-tetrakisphosphate Biosynthesis	0.666	0.0811	NUDT3,PPP1CA,PPP1CB
Clathrin-mediated Endocytosis Signaling	0.643	0.0789	AP2M1,CLTA,SH3GL1
Cardiac Hypertrophy Signaling	0.643	0.0789	GNA13,KRAS,TGFB1
Role of NANOG in Mammalian Embryonic Stem Cell Pluripotency	0.636	0.0952	GAB1,KRAS
Role of MAPK Signaling in the Pathogenesis of Influenza	0.636	0.0952	KRAS,PNPLA8
Chemokine Signaling	0.636	0.0952	KRAS,PPP1CB
Th1 and Th2 Activation Pathway	0.636	0.0952	BHLHE41,TGFB1
G Protein Signaling Mediated by Tubby	0.63	0.167	GNA13
Altered T Cell and B Cell Signaling in Rheumatoid Arthritis	0.63	0.167	TGFB1
Transcriptional Regulatory Network in Embryonic Stem Cells	0.63	0.167	FOXC1
Actin Cytoskeleton Signaling	0.622	0.0769	GNA13,KRAS,PPP1CB
D-myo-inositol-5-phosphate Metabolism	0.622	0.0769	NUDT3,PPP1CA,PPP1CB
fMLP Signaling in Neutrophils	0.606	0.0909	GNA13,KRAS
3-phosphoinositide Degradation	0.601	0.075	NUDT3,PPP1CA,PPP1CB
Protein Ubiquitination Pathway	0.597	0.0678	ANAPC11,PSMD9,UBE2B,UBE2J2
Regulation Of The Epithelial Mesenchymal Transition By Growth Factors Pathway	0.58	0.0732	GAB1,KRAS,TGFB1
Cholecystokinin/Gastrin-mediated Signaling	0.578	0.087	GNA13,KRAS
Gα12/13 Signaling	0.578	0.087	GNA13,KRAS
Regulation of IL-2 Expression in Activated and Anergic T Lymphocytes	0.578	0.087	KRAS,TGFB1
Apelin Endothelial Signaling Pathway	0.578	0.087	GNA13,KRAS
Lipid Antigen Presentation by CD1	0.573	0.143	AP2M1
Apelin Cardiac Fibroblast Signaling Pathway	0.573	0.143	TGFB1
Apelin Muscle Signaling Pathway	0.573	0.143	GNA13
HIF1α Signaling	0.561	0.0714	EGLN2,KRAS,TGFB1
Integrin Signaling	0.561	0.0714	ARF1,KRAS,PPP1CB
Role of NFAT in Regulation of the Immune Response	0.552	0.0833	GNA13,KRAS
IL-17 Signaling	0.552	0.0833	KRAS,TGFB1
STAT3 Pathway	0.552	0.0833	KRAS,TGFB1
Xenobiotic Metabolism PXR Signaling Pathway	0.552	0.0833	PPP1CA,PPP1CB
Pulmonary Fibrosis Idiopathic Signaling Pathway	0.547	0.061	BIRC5,GNA13,KRAS,TERT,TGFB1
3-phosphoinositide Biosynthesis	0.543	0.0698	NUDT3,PPP1CA,PPP1CB
ERK/MAPK Signaling	0.543	0.0698	KRAS,PPP1CA,PPP1CB
CXCR4 Signaling	0.528	0.08	GNA13,KRAS
Non-Small Cell Lung Cancer Signaling	0.528	0.08	HDAC3,KRAS
Atherosclerosis Signaling	0.528	0.08	PNPLA8,TGFB1
Systemic Lupus Erythematosus In B Cell Signaling Pathway	0.525	0.0682	GAB1,KRAS,TGFB1
FcγRIIB Signaling in B Lymphocytes	0.524	0.125	KRAS
T Helper Cell Differentiation	0.524	0.125	TGFB1
Oncostatin M Signaling	0.524	0.125	KRAS
Mechanisms of Viral Exit from Host Cells	0.524	0.125	SH3GL1
MIF-mediated Glucocorticoid Regulation	0.524	0.125	MIF
SPINK1 Pancreatic Cancer Pathway	0.524	0.125	TGFB1
HMGB1 Signaling	0.504	0.0769	KRAS,TGFB1
RHOA Signaling	0.504	0.0769	GNA13,PPP1CB
PI3K Signaling in B Lymphocytes	0.504	0.0769	ATF5,KRAS
Superpathway of Inositol Phosphate Compounds	0.491	0.0652	NUDT3,PPP1CA,PPP1CB
Erythropoietin Signaling Pathway	0.482	0.0741	KRAS,TGFB1
Chondroitin Sulfate Biosynthesis	0.482	0.111	B3GALT6
Nucleotide Excision Repair Pathway	0.482	0.111	POLR2C
Eicosanoid Signaling	0.482	0.111	PNPLA8
HER-2 Signaling in Breast Cancer	0.475	0.0638	ARF1,BIRC5,KRAS
Regulation of the Epithelial-Mesenchymal Transition Pathway	0.475	0.0638	GAB1,KRAS,TGFB1
NGF Signaling	0.462	0.0714	GAB1,KRAS
T Cell Exhaustion Signaling Pathway	0.462	0.0714	KRAS,TGFB1
ID1 Signaling Pathway	0.459	0.0625	BIRC5,KRAS,TGFB1
MIF Regulation of Innate Immunity	0.445	0.1	MIF
Airway Pathology in Chronic Obstructive Pulmonary Disease	0.445	0.1	TGFB1
Role of JAK1 and JAK3 in γc Cytokine Signaling	0.445	0.1	KRAS
CDP-diacylglycerol Biosynthesis I	0.445	0.1	MBOAT7
Phosphatidylglycerol Biosynthesis II (Non-plastidic)	0.445	0.1	MBOAT7
IL-4 Signaling	0.445	0.1	KRAS
SPINK1 General Cancer Pathway	0.445	0.1	KRAS
NAD Signaling Pathway	0.442	0.069	POLR2C,TGFB1
HGF Signaling	0.442	0.069	GAB1,KRAS
Human Embryonic Stem Cell Pluripotency	0.442	0.069	GNA13,TGFB1
Bladder Cancer Signaling	0.442	0.069	HDAC3,KRAS
Oxytocin Signaling Pathway	0.43	0.06	GNA13,KRAS,PPP1CB
MicroRNA Biogenesis Signaling Pathway	0.43	0.06	KRAS,POLR2C,TGFB1
Sirtuin Signaling Pathway	0.429	0.0563	ATP5F1D,ESRRA,NDUFB7,TIMM22
Role of Tissue Factor in Cancer	0.423	0.0667	GNA13,KRAS
CNTF Signaling	0.412	0.0909	KRAS
Inhibition of Angiogenesis by TSP1	0.412	0.0909	TGFB1
ERB2-ERBB3 Signaling	0.412	0.0909	KRAS
Heparan Sulfate Biosynthesis	0.412	0.0909	B3GALT6
Dermatan Sulfate Biosynthesis	0.412	0.0909	B3GALT6
Superpathway of Methionine Degradation	0.412	0.0909	MAT2A
IL-2 Signaling	0.412	0.0909	KRAS
FAT10 Signaling Pathway	0.412	0.0909	PSMD9
Oxytocin In Brain Signaling Pathway	0.406	0.0645	KRAS,PNPLA8
Germ Cell-Sertoli Cell Junction Signaling	0.406	0.0645	KRAS,TGFB1
Dopamine-DARPP32 Feedback in cAMP Signaling	0.406	0.0645	PPP1CA,PPP1CB
Synaptogenesis Signaling Pathway	0.403	0.0577	AP2M1,KRAS,NLGN3
NF-κB Activation by Viruses	0.383	0.0833	KRAS
Maturity Onset Diabetes of Young (MODY) Signaling	0.383	0.0833	KLF11
Melanoma Signaling	0.383	0.0833	KRAS
Phospholipases	0.383	0.0833	PNPLA8
Triacylglycerol Biosynthesis	0.383	0.0833	MBOAT7
Gαs Signaling	0.383	0.0833	GNA13
Cancer Drug Resistance By Drug Efflux	0.383	0.0833	KRAS
FAT10 Cancer Signaling Pathway	0.383	0.0833	TGFB1
Prostate Cancer Signaling	0.373	0.0606	HDAC3,KRAS
Cell Cycle: G1/S Checkpoint Regulation	0.373	0.0606	HDAC3,TGFB1
B Cell Receptor Signaling	0.373	0.0606	GAB1,KRAS
Ferroptosis Signaling Pathway	0.373	0.0606	ARF1,KRAS
Hereditary Breast Cancer Signaling	0.366	0.0545	HDAC3,KRAS,POLR2C
Antiproliferative Role of Somatostatin Receptor 2	0.357	0.0769	KRAS
Endometrial Cancer Signaling	0.357	0.0769	KRAS
Thyroid Cancer Signaling	0.357	0.0769	KRAS
Glioma Invasiveness Signaling	0.357	0.0769	KRAS
CLEAR Signaling Pathway	0.354	0.0536	ATP6V1F,KRAS,TGFB1
Glioma Signaling	0.343	0.0571	HDAC3,KRAS
Cyclins and Cell Cycle Regulation	0.343	0.0571	HDAC3,TGFB1
Sperm Motility	0.343	0.0571	GNA13,PNPLA8
Necroptosis Signaling Pathway	0.343	0.0571	TIMM22,TRPM7
Tumor Microenvironment Pathway	0.343	0.0571	KRAS,TGFB1
FAK Signaling	0.335	0.05	ADORA1,KRAS,SH3GL1,TGFB1
Agrin Interactions at Neuromuscular Junction	0.334	0.0714	KRAS
Ephrin B Signaling	0.334	0.0714	GNA13
ERBB4 Signaling	0.334	0.0714	KRAS
Stearate Biosynthesis I (Animals)	0.334	0.0714	MBOAT7
UVC-Induced MAPK Signaling	0.334	0.0714	KRAS
BMP signaling pathway	0.334	0.0714	KRAS
PI3K/AKT Signaling	0.316	0.0541	GAB1,KRAS
CCR5 Signaling in Macrophages	0.312	0.0667	GNA13
Thrombopoietin Signaling	0.312	0.0667	KRAS
IL-15 Signaling	0.312	0.0667	KRAS
Cellular Effects of Sildenafil (Viagra)	0.312	0.0667	PPP1CB
Acute Myeloid Leukemia Signaling	0.312	0.0667	KRAS
Macropinocytosis Signaling	0.312	0.0667	KRAS
PFKFB4 Signaling Pathway	0.312	0.0667	TGFB1
Cardiac Hypertrophy Signaling (Enhanced)	0.309	0.0482	GNA13,HDAC3,KRAS,TGFB1
Molecular Mechanisms of Cancer	0.293	0.0463	GAB1,GNA13,HDAC3,KRAS,TGFB1
Polyamine Regulation in Colon Cancer	0.293	0.0625	KRAS
Sphingosine-1-phosphate Signaling	0.293	0.0625	GNA13
Actin Nucleation by ARP-WASP Complex	0.293	0.0625	KRAS
VEGF Family Ligand-Receptor Interactions	0.293	0.0625	KRAS
PD-1, PD-L1 cancer immunotherapy pathway	0.293	0.0625	TGFB1
MSP-RON Signaling In Macrophages Pathway	0.293	0.0625	KRAS
GM-CSF Signaling	0.293	0.0625	KRAS
Production of Nitric Oxide and Reactive Oxygen Species in Macrophages	0.291	0.0513	PPP1CA,PPP1CB
Senescence Pathway	0.285	0.0465	ANAPC11,KRAS,PPP1CA,TGFB1
Pulmonary Healing Signaling Pathway	0.28	0.05	KRAS,TGFB1
Ephrin Receptor Signaling	0.28	0.05	GNA13,KRAS
IL-1 Signaling	0.275	0.0588	GNA13
Antiproliferative Role of TOB in T Cell Signaling	0.275	0.0588	TGFB1
ERBB Signaling	0.275	0.0588	KRAS
Apelin Cardiomyocyte Signaling Pathway	0.275	0.0588	TGFB1
Systemic Lupus Erythematosus In T Cell Signaling Pathway	0.269	0.0488	GNA13,KRAS
CSDE1 Signaling Pathway	0.258	0.0556	TGFB1
Regulation of Actin-based Motility by Rho	0.258	0.0556	PPP1CB
PAK Signaling	0.258	0.0556	KRAS
Regulation of Cellular Mechanics by Calpain Protease	0.258	0.0556	KRAS
RAR Activation	0.258	0.0476	NR2F6,TGFB1
Wound Healing Signaling Pathway	0.248	0.0465	KRAS,TGFB1
Ovarian Cancer Signaling	0.248	0.0465	HDAC3,KRAS
Dilated Cardiomyopathy Signaling Pathway	0.243	0.0526	GAB1
IL-13 Signaling Pathway	0.243	0.0526	TGFB1
IL-3 Signaling	0.243	0.0526	KRAS
Granzyme A Signaling	0.243	0.0526	NDUFB7
NUR77 Signaling in T Lymphocytes	0.243	0.0526	ESRRA
Role of Macrophages, Fibroblasts and Endothelial Cells in Rheumatoid Arthritis	0.241	0.0441	KRAS,MIF,TGFB1
NRF2-mediated Oxidative Stress Response	0.239	0.0455	CLPP,KRAS
IL-8 Signaling	0.229	0.0444	GNA13,KRAS
LPS-stimulated MAPK Signaling	0.229	0.05	KRAS
Renin-Angiotensin Signaling	0.229	0.05	KRAS
FLT3 Signaling in Hematopoietic Progenitor Cells	0.229	0.05	KRAS
PKCθ Signaling in T Lymphocytes	0.229	0.05	KRAS
P2Y Purigenic Receptor Signaling Pathway	0.229	0.05	KRAS
JAK/STAT Signaling	0.229	0.05	KRAS
PDGF Signaling	0.229	0.05	KRAS
Ceramide Signaling	0.216	0.0476	KRAS
Role of Pattern Recognition Receptors in Recognition of Bacteria and Viruses	0.216	0.0476	TGFB1
Relaxin Signaling	0.216	0.0476	GNA13
Melanocyte Development and Pigmentation Signaling	0.216	0.0476	KRAS
Prolactin Signaling	0.216	0.0476	KRAS
Antioxidant Action of Vitamin C	0.216	0.0476	PNPLA8
PEDF Signaling	0.216	0.0476	KRAS
FGF Signaling	0.216	0.0476	GAB1
PPAR Signaling	0.216	0.0476	KRAS
BAG2 Signaling Pathway	0.216	0.0476	PSMD9
White Adipose Tissue Browning Pathway	0.216	0.0476	THRA
Role of MAPK Signaling in Inhibiting the Pathogenesis of Influenza	0.216	0.0476	PNPLA8
14-3-3-mediated Signaling	0.204	0.0455	KRAS
IL-12 Signaling and Production in Macrophages	0.204	0.0455	TGFB1
Phagosome Maturation	0.204	0.0455	ATP6V1F
Iron homeostasis signaling pathway	0.204	0.0455	ATP6V1F
Mouse Embryonic Stem Cell Pluripotency	0.193	0.0435	KRAS
GADD45 Signaling	0.193	0.0435	TGFB1
UVA-Induced MAPK Signaling	0.193	0.0435	KRAS
CDX Gastrointestinal Cancer Signaling Pathway	0	0.037	TGFB1
Macrophage Classical Activation Signaling Pathway	0	0.0357	TGFB1
Multiple Sclerosis Signaling Pathway	0	0.0333	TGFB1
Pathogen Induced Cytokine Storm Signaling Pathway	0	0.025	TGFB1
Role Of Osteoblasts In Rheumatoid Arthritis Signaling Pathway	0	0.0244	TGFB1
Role Of Osteoclasts In Rheumatoid Arthritis Signaling Pathway	0	0.0175	KRAS
Ribonucleotide Reductase Signaling Pathway	0	0.037	BIRC5,KRAS
Natural Killer Cell Signaling	0	0.0345	KRAS
Neuregulin Signaling	0	0.04	KRAS
Axonal Guidance Signaling	0	0.0247	GNA13,KRAS
Aryl Hydrocarbon Receptor Signaling	0	0.0233	TGFB1
p53 Signaling	0	0.0323	BIRC5
Acute Phase Response Signaling	0	0.0333	KRAS
Hepatic Cholestasis	0	0.0417	TGFB1
Hepatic Fibrosis / Hepatic Stellate Cell Activation	0	0.025	TGFB1
Tight Junction Signaling	0	0.0256	TGFB1
Reelin Signaling in Neurons	0	0.0323	PAFAH1B2
Factors Promoting Cardiogenesis in Vertebrates	0	0.0333	TGFB1
GNRH Signaling	0	0.0333	KRAS
Aldosterone Signaling in Epithelial Cells	0	0.0312	KRAS
Small Cell Lung Cancer Signaling	0	0.0333	HDAC3
p70S6K Signaling	0	0.0385	KRAS
mTOR Signaling	0	0.0227	KRAS
Systemic Lupus Erythematosus Signaling	0	0.0333	KRAS
CDC42 Signaling	0	0.0417	PPP1CB
AMPK Signaling	0	0.0192	GNA13
RAC Signaling	0	0.0345	KRAS
Role of Osteoblasts, Osteoclasts and Chondrocytes in Rheumatoid Arthritis	0	0.0222	TGFB1
Regulation of eIF4 and p70S6K Signaling	0	0.0294	KRAS
Glioblastoma Multiforme Signaling	0	0.0263	KRAS
Signaling by Rho Family GTPases	0	0.0222	GNA13
RHOGDI Signaling	0	0.0312	GNA13
Sertoli Cell-Sertoli Cell Junction Signaling	0	0.0256	KRAS
Gap Junction Signaling	0	0.0333	KRAS
eNOS Signaling	0	0.0417	NOSIP
Epithelial Adherens Junction Signaling	0	0.025	KRAS
Gαq Signaling	0	0.0323	GNA13
TEC Kinase Signaling	0	0.04	GNA13
PTEN Signaling	0	0.037	KRAS
Xenobiotic Metabolism Signaling	0	0.0233	KRAS
WNT/β-catenin Signaling	0	0.0263	TGFB1
IGF-1 Signaling	0	0.0417	KRAS
cAMP-mediated signaling	0	0.0345	ADORA1
p38 MAPK Signaling	0	0.0345	TGFB1
Apoptosis Signaling	0	0.0385	KRAS
NF-κB Signaling	0	0.04	KRAS
VEGF Signaling	0	0.04	KRAS
T Cell Receptor Signaling	0	0.0312	KRAS
G-Protein Coupled Receptor Signaling	0	0.0366	ADORA1,GNA13,KRAS
IL-6 Signaling	0	0.0417	KRAS
Phagosome Formation	0	0.038	ADORA1,KRAS,PNPLA8
Autophagy	0	0.0222	TGFB1
Osteoarthritis Pathway	0	0.04	HDAC3,TGFB1
Neuroinflammation Signaling Pathway	0	0.0426	BIRC5,TGFB1
Adrenomedullin signaling pathway	0	0.037	KRAS
NER (Nucleotide Excision Repair, Enhanced Pathway)	0	0.0312	POLR2C
Endocannabinoid Developing Neuron Pathway	0	0.04	KRAS
Endocannabinoid Cancer Inhibition Pathway	0	0.0286	GNA13
Inhibition of ARE-Mediated mRNA Degradation Pathway	0	0.0263	PSMD9
HOTAIR Regulatory Pathway	0	0.0357	TGFB1
Hepatic Fibrosis Signaling Pathway	0	0.0375	KRAS,TGFB1,TRPM7
Xenobiotic Metabolism General Signaling Pathway	0	0.0385	KRAS
Insulin Secretion Signaling Pathway	0	0.025	KLF11
Semaphorin Neuronal Repulsive Signaling Pathway	0	0.0323	PPP1CB
Coronavirus Pathogenesis Pathway	0	0.0357	HDAC3,TGFB1
MSP-RON Signaling In Cancer Cells Pathway	0	0.0417	KRAS
Calcium Signaling	0	0.0303	HDAC3

## Sheet: Results lose rhythmicity in old
Filtering criterion: weighted BIC > 0.75 for ‘Rhythmic in Young but not Old’ model
Ingenuity Canonical Pathways	-log(Enrichment p-value)	Fraction of pathway covered	Molecules
EIF2 Signaling	4.87	0.223	AKT3,CDK11A,EIF2AK1,EIF2AK2,EIF3F,EIF4A1,EIF5,FAU,INSR,MAP2K2,MRAS,NOX4,NRAS,RAF1,RAP2A,RPL11,RPL18,RPL19,RPL22,RPL23,RPL28,RPL30,RPL35A,RPL36AL,RPL37A,RPL39,RPL7,RPL9,RPS11,RPS13,RPS15A,RPS19,RPS20,RPS21,RPS23,RPS24,RPS25,RPS27A,RPS29,RPS9,RPSA,RRAS,XIAP
Mitochondrial Dysfunction	3.96	0.222	APH1B,APP,ATP5F1A,ATP5F1E,ATP5PD,ATP5PF,CASP8,COX6B1,COX6C,COX7A2,FURIN,GLRX2,MAPK8,MT-ATP6,MT-CO1,MT-CO2,MT-CO3,MT-CYB,MT-ND1,MT-ND2,MT-ND3,MT-ND4,MT-ND4L,MT-ND5,MT-ND6,NDUFA11,NDUFA4,NDUFA5,NDUFA6,PRDX5,RHOT2,TRAK1,UCP2,XDH
Oxidative Phosphorylation	2.77	0.222	ATP5F1A,ATP5F1E,ATP5PD,ATP5PF,COX6B1,COX6C,COX7A2,MT-ATP6,MT-CO1,MT-CO2,MT-CO3,MT-CYB,MT-ND1,MT-ND2,MT-ND3,MT-ND4,MT-ND4L,MT-ND5,NDUFA11,NDUFA4,NDUFA5,NDUFA6
CLEAR Signaling Pathway	2.76	0.182	AKT3,ASAH1,ATP6AP1,ATP6AP2,ATP6V0A2,ATP6V0E2,BLOC1S3,BMPR1A,CREB1,CREB3L1,CRTC2,CTSA,CTSF,EP300,GNPTG,HEXA,HPS3,INSR,ITPR1,LAMP1,LAMTOR4,M6PR,MRAS,NAGLU,NPRL2,NPRL3,NRAS,PML,PPP2R3B,PRKAA2,PRKD1,RAP2A,RRAGA,RRAS,SLC38A9,STK11,SUMF1,VPS18,YWHAB,YWHAE,YWHAH,YWHAZ
WNT/β-catenin Signaling	2.73	0.208	ACVR1,ACVR1B,AKT3,CDH2,CDKN2A,CSNK1G2,CSNK1G3,CSNK2B,CTNNB1,DKK3,DVL1,DVL2,EP300,FZD6,HDAC1,LRP5,LRP6,MDM2,PPP2R3B,RPS27A,SOX9,TCF4,UBB,UBC,WNT10B,WNT5A
HOTAIR Regulatory Pathway	2.69	0.212	AKT3,AR,ATG7,BRD4,CTNNB1,DNMT3B,EP300,FOXM1,HDAC1,HSF1,KDM1A,MDM2,MMP11,MMP17,PTEN,RCOR1,RELA,REST,ROCK1,TCF4,VIM,WNT10B,WNT5A,XIAP
mTOR Signaling	2.66	0.19	AKT3,EIF3F,EIF4A1,FAU,INSR,MRAS,NAPEPLD,NRAS,PLD3,PPP2R3B,PRKAA2,PRKD1,RAC3,RAP2A,RHOBTB2,RHOT1,RHOT2,RICTOR,RPS11,RPS13,RPS15A,RPS19,RPS20,RPS21,RPS23,RPS24,RPS25,RPS27A,RPS29,RPS9,RPSA,RRAS,STK11,VEGFB
Phagosome Maturation	2.58	0.209	ATP6AP1,ATP6AP2,ATP6V0A2,ATP6V0E2,B2M,BET1L,CTSA,CTSF,CTSK,CTSZ,DYNC1H1,DYNC2H1,HLA-A,LAMP1,M6PR,NAPG,NOX4,NSF,PRDX5,RAC3,STX1B,VPS18,VPS41,YKT6
Huntington's Disease Signaling	2.51	0.176	AKT3,ATP5F1A,ATP5F1E,ATP5PF,BET1L,CAPN1,CAPNS1,CASP4,CASP6,CASP7,CASP8,CREB1,CREB3L1,EP300,GNB2,GNB4,GNG12,HDAC1,HIP1,HSPA1A/HSPA1B,ITPR1,MAPK8,NAPG,NCOR1,NSF,PLCB1,POLR2K,PRKD1,PSMB7,PSMD13,PSMD5,RASA1,RCOR1,REST,RPS27A,SP1,STX1B,TAF9B,UBB,UBC,UBE2S,YKT6
Epithelial Adherens Junction Signaling	2.5	0.199	ACVR1,ACVR1B,AKT3,ARPC1A,BAIAP2,CDH2,CTNNB1,FGF1,KIF23,MRAS,MYL12B,NECTIN2,NRAS,PAK4,PPP2R3B,PRKAA2,PTEN,RAP2A,ROCK1,RRAS,STK11,TCF4,YAP1,YWHAB,YWHAE,YWHAH,YWHAZ
BMP signaling pathway	2.49	0.239	BMP1,BMPR1A,CAMK4,CREB1,GREM1,MAP2K2,MAPK8,MRAS,NRAS,RAF1,RAP2A,RELA,RRAS,SMAD5,SMAD9,XIAP
Role of NANOG in Mammalian Embryonic Stem Cell Pluripotency	2.49	0.233	AKT3,BMP1,BMPR1A,CTNNB1,DVL1,FZD6,MAP2K2,MRAS,NRAS,RAF1,RAP2A,RIF1,RRAS,SMAD5,SMAD9,WNT10B,WNT5A
TGF-β Signaling	2.43	0.225	ACVR1,ACVR1B,AMH,BMPR1A,EP300,HDAC1,MAP2K2,MAPK8,MRAS,NRAS,RAF1,RAP2A,RRAS,SMAD5,SMAD9,TGIF1,VDR,ZFYVE9
Factors Promoting Cardiogenesis in Vertebrates	2.41	0.212	ACVR1,ACVR1B,BMP1,BMPR1A,CREB1,CREB3L1,CTNNB1,DVL1,FZD6,LRP5,LRP6,MAPK8,NOX4,PLCB1,PRKD1,ROCK1,SMAD5,SMAD9,TCF4,WNT10B,WNT5A
Sumoylation Pathway	2.4	0.215	AR,DAXX,EP300,HDAC1,KDM1A,MAPK8,MDM2,PML,RAC3,RANGAP1,RCOR1,RHOBTB2,RHOT1,RHOT2,SENP6,SP1,SP3,SUMO3,XIAP,ZNF217
Molecular Mechanisms of Cancer	2.39	0.162	AKT3,APH1B,BAD,BMP1,BMPR1A,CASP6,CASP7,CASP8,CBL,CDK11A,CDK14,CDK16,CDK6,CDKN2A,CDKN2C,CFLAR,CHEK2,CTNNB1,DAXX,DVL1,E2F4,EP300,FZD6,GNB2,GNB4,GNG12,HDAC1,HHAT,ITGAV,ITGB1,LRP5,LRP6,MAP2K2,MAPK8,MDM2,MRAS,NRAS,PAK4,PLCB1,PRKD1,RAC3,RAF1,RAP2A,RASA1,RBPJ,RELA,RHOBTB2,RHOT1,RHOT2,RRAS,SMAD5,SMAD9,TAB2,TCF4,WNT10B,WNT5A,XIAP,ZBTB17
Role of WNT/GSK-3β Signaling in the Pathogenesis of Influenza	2.27	0.268	CSNK1G2,CSNK1G3,CTNNB1,DVL1,DVL2,FZD6,IFNAR1,SIAH1,TCF4,WNT10B,WNT5A
Cell Cycle: G2/M DNA Damage Checkpoint Regulation	2.24	0.255	CDKN2A,CHEK2,CKS1B,EP300,MDM2,MDM4,SKP1,WEE1,YWHAB,YWHAE,YWHAH,YWHAZ
Melanoma Signaling	2.18	0.262	AKT3,BAD,CDKN2A,MAP2K2,MDM2,MRAS,NRAS,PTEN,RAF1,RAP2A,RRAS
Pulmonary Healing Signaling Pathway	2.18	0.192	BMPR1A,CTNNB1,EP300,FOXM1,FZD6,MAPK8,MMP11,MMP17,MRAS,NRAS,PRKAA2,PRKD1,RAF1,RAP2A,RBPJ,RRAS,SMAD5,SMAD9,TCF4,THBS1,VEGFB,WNT10B,WNT5A,WWTR1,YAP1
Role of Osteoblasts, Osteoclasts and Chondrocytes in Rheumatoid Arthritis	2	0.184	ACP5,AKT3,BAD,BMP1,BMPR1A,CAMK4,CBL,CSNK1G2,CSNK1G3,CTNNB1,CTSK,DKK3,DVL1,FZD6,LRP5,LRP6,MAPK8,RELA,SMAD5,SMAD9,TAB2,TCF4,TRAF5,WNT10B,WNT5A,XIAP
MSP-RON Signaling In Cancer Cells Pathway	1.98	0.198	AKT3,CREB1,CREB3L1,CTNNB1,ITGB1,MAP2K2,MRAS,NRAS,RAF1,RAP2A,RELA,RRAS,SP1,TCF4,VEGFB,VIM,YWHAB,YWHAE,YWHAH,YWHAZ
ERK5 Signaling	1.96	0.222	BAD,CREB1,CREB3L1,ELK4,MAP3K2,MRAS,NRAS,RAP2A,RRAS,WNK1,YWHAB,YWHAE,YWHAH,YWHAZ
Ephrin Receptor Signaling	1.88	0.179	ACP1,AKT3,ARPC1A,CREB1,CREB3L1,EFNA4,EFNA5,EPHA5,FGF1,GNB2,GNB4,GNG12,GRIN2C,ITGAV,ITGB1,MAP2K2,MRAS,NRAS,PAK4,RAC3,RAF1,RAP2A,RASA1,RGS3,ROCK1,RRAS,VEGFB
14-3-3-mediated Signaling	1.73	0.19	AKT3,BAD,CBL,MAP2K2,MAPK8,MRAS,NRAS,PLCB1,PRKD1,RAF1,RAP2A,RRAS,STK11,VIM,YAP1,YWHAB,YWHAE,YWHAH,YWHAZ
Role Of Osteoclasts In Rheumatoid Arthritis Signaling Pathway	1.71	0.166	ACP5,ADAM12,ADAM15,AKT3,BAD,CAMK4,CBL,COL15A1,COL16A1,COL18A1,COL6A1,COL6A2,CREB1,CREB3L1,CTNNB1,CTSK,MAP2K2,MAPK8,MMP11,MMP17,MRAS,NRAS,RAC3,RAF1,RAP2A,RELA,RHOBTB2,RHOT1,RHOT2,RRAS,TAB2,TRAF5,XIAP
Synaptic Long Term Potentiation	1.71	0.195	CAMK4,CREB1,CREB3L1,EP300,GRIN2C,ITPR1,MAP2K2,MRAS,NRAS,PLCB1,PPP1R10,PPP1R3C,PPP1R3D,PRKD1,RAF1,RAP2A,RRAS
α-Adrenergic Signaling	1.65	0.2	CAMK4,GNB2,GNB4,GNG12,ITPR1,MAP2K2,MRAS,NRAS,PHKA2,PHKB,PHKG2,PRKD1,RAF1,RAP2A,RRAS
Ferroptosis Signaling Pathway	1.64	0.186	ABCA1,ANGPTL4,H2BC12,H2BC5,MAP2K2,MRAS,NFS1,NOX4,NRAS,PHKG2,PRKAA2,RAF1,RAP2A,RRAS,SP1,SQSTM1,TFAP2C,WWTR1,YAP1
p53 Signaling	1.63	0.195	AKT3,CASP6,CDKN2A,CHEK2,CTNNB1,EP300,HDAC1,MAPK8,MDM2,MDM4,PLAGL1,PML,PPP1R13B,PTEN,THBS1,TNFRSF10B
Regulation of eIF4 and p70S6K Signaling	1.61	0.171	AKT3,EIF3F,EIF4A1,FAU,ITGAV,ITGB1,MAP2K2,MRAS,NRAS,PPP2R3B,RAF1,RAP2A,RPS11,RPS13,RPS15A,RPS19,RPS20,RPS21,RPS23,RPS24,RPS25,RPS27A,RPS29,RPS9,RPSA,RRAS
ID1 Signaling Pathway	1.6	0.172	ACVR1,ACVR1B,AKT3,APP,BMPR1A,CDKN2A,CTNNB1,DVL2,EP300,KIF11,MDM2,MRAS,NRAS,PTEN,RAF1,RAP2A,REST,RRAS,SEMA4C,SMAD5,SMAD9,TFAP2A,VEGFB,VIM,ZNF148
Systemic Lupus Erythematosus Signaling	1.6	0.179	AKT3,C5,CAMK4,CBL,CD2BP2,HLA-A,LSM12,LSM3,MRAS,NRAS,PIM2,PRPF18,PRPF3,PRPF39,RAP2A,RRAS,SNRNP48,SNRPE,SNRPG,TNFRSF13C,ZMAT5
Mouse Embryonic Stem Cell Pluripotency	1.59	0.193	AKT3,BMPR1A,CTNNB1,DVL1,DVL2,FZD6,MAP2K2,MRAS,NRAS,RAF1,RAP2A,RRAS,SMAD5,SMAD9,TCF4,XIAP
CCR3 Signaling in Eosinophils	1.53	0.187	CAMK4,GNB2,GNB4,GNG12,ITPR1,JMJD7-PLA2G4B,MAP2K2,MPRIP,MRAS,NRAS,PAK4,PLCB1,PRKD1,RAF1,RAP2A,ROCK1,RRAS
Hereditary Breast Cancer Signaling	1.49	0.173	AKT3,ARID2,BARD1,BRCA2,CDK6,CHEK2,EP300,FANCL,HDAC1,MRAS,NRAS,PHF10,POLR2K,PTEN,RAP2A,RPS27A,RRAS,SMARCB1,SMARCD1,UBB,UBC,WEE1
Colorectal Cancer Metastasis Signaling	1.47	0.161	AKT3,BAD,CTNNB1,DVL1,E2F4,FZD6,GNB2,GNB4,GNG12,IFNGR1,LRP5,LRP6,MAP2K2,MAPK8,MMP11,MMP17,MRAS,MSH3,NRAS,RAC3,RAP2A,RELA,RHOBTB2,RHOT1,RHOT2,RRAS,SIAH1,TCF4,VEGFB,WNT10B,WNT5A
Apoptosis Signaling	1.46	0.186	BAD,CAPN1,CAPNS1,CASP6,CASP7,CASP8,MAP2K2,MAPK8,MRAS,NRAS,RAF1,RAP2A,RELA,ROCK1,RRAS,XIAP
N-acetylglucosamine Degradation I	1.44	0.667	GNPDA1,GNPDA2
Bladder Cancer Signaling	1.42	0.188	CDKN2A,E2F4,FGF1,HDAC1,MAP2K2,MDM2,MMP11,MMP17,MRAS,NRAS,RAF1,RAP2A,RRAS,THBS1,VEGFB
DNA Methylation and Transcriptional Repression Signaling	1.42	0.184	CDK11A,CDK14,CDK16,CDK6,CHD4,DNMT3B,E2F4,GATAD2B,HDAC1,MBD3,RELA,SAP130,SP1,SUDS3,TCF4,TET3
RAC Signaling	1.41	0.176	ARPC1A,BAIAP2,ELK4,ITGAV,ITGB1,MAP2K2,MAP3K11,MAPK8,MRAS,NCKAP1,NOX4,NRAS,PAK4,PIP4K2C,RAC3,RAF1,RAP2A,RELA,RRAS
Prostate Cancer Signaling	1.41	0.178	AKT3,AR,BAD,CREB1,CREB3L1,CTNNB1,E2F4,GSTP1,HDAC1,MAP2K2,MDM2,MRAS,NRAS,PTEN,RAF1,RAP2A,RELA,RRAS
Estrogen Receptor Signaling	1.4	0.149	AKT3,ATP5F1A,ATP5F1E,BAD,CREB1,CREB3L1,EP300,GNB2,GNB4,GNG12,MAP2K2,MED15,MED4,MMP11,MMP17,MPRIP,MRAS,MT-ATP6,MT-CYB,MT-ND1,MT-ND2,MT-ND3,MT-ND4,MT-ND4L,MT-ND5,MT-ND6,MYL12B,NCOR1,NDUFA11,NDUFA4,NDUFA5,NDUFA6,NRAS,PLCB1,PRKAA2,PRKD1,PTEN,RAF1,RAP2A,RELA,ROCK1,RRAS,SP1,SRA1,VEGFB,ZDHHC21
Glioblastoma Multiforme Signaling	1.36	0.168	AKT3,CDK6,CDKN2A,CTNNB1,E2F4,FZD6,ITPR1,MAP2K2,MDM2,MRAS,NRAS,PLCB1,PTEN,RAC3,RAF1,RAP2A,RHOBTB2,RHOT1,RHOT2,RRAS,WNT10B,WNT5A
Kinetochore Metaphase Signaling Pathway	1.34	0.177	ANAPC13,AURKB,BUB3,CENPC,CENPL,CENPT,CENPU,ESPL1,INCENP,MASTL,PPP1R10,PPP1R3C,PPP1R3D,SKA1,SKA2,SMC3,SPC24
IL-8 Signaling	1.32	0.162	AKT3,GNB2,GNB4,GNG12,ITGAV,MAP2K2,MAPK8,MRAS,MYL12B,NAPEPLD,NOX4,NRAS,PLD3,PRKD1,RAB11FIP2,RAC3,RAF1,RAP2A,RELA,RHOBTB2,RHOT1,RHOT2,ROCK1,RRAS,VEGFB
Systemic Lupus Erythematosus In T Cell Signaling Pathway	1.32	0.162	AKT3,B2M,CAMK4,CASP4,CASP6,CASP7,CASP8,CBL,CREB1,CREB3L1,HLA-A,ITPR1,MAP2K2,MRAS,NRAS,PPP2R3B,RAC3,RAP2A,RDX,RHOBTB2,RHOT1,RHOT2,ROCK1,RRAS,SP1
Natural Killer Cell Signaling	1.32	0.168	AKT3,B2M,COL18A1,HLA-A,HSPA1A/HSPA1B,ITGB1,MAP2K2,MAP3K11,MAP3K2,MICB,MRAS,NECTIN2,NRAS,PAK4,RAC3,RAF1,RAP2A,RELA,ROCK1,RRAS,ULBP1
CXCR4 Signaling	1.29	0.167	AKT3,GNB2,GNB4,GNG12,ITPR1,MAP2K2,MAPK8,MRAS,MYL12B,NRAS,PAK4,PLCB1,PRKD1,RAC3,RAF1,RAP2A,RHOBTB2,RHOT1,RHOT2,ROCK1,RRAS
Cancer Drug Resistance By Drug Efflux	1.28	0.209	AKT3,MAP2K2,MDM2,MRAS,NRAS,PTEN,RAF1,RAP2A,RRAS
NF-κB Signaling	1.25	0.167	AKT3,BCL10,BMPR1A,CASP8,CSNK2B,EIF2AK2,EP300,HDAC1,INSR,MAPK8,MRAS,NRAS,RAF1,RAP2A,RELA,RRAS,TAB2,TDP2,TIRAP,TRAF5
Chemokine Signaling	1.24	0.193	CAMK1D,CAMK4,MAP2K2,MAPK8,MPRIP,MRAS,NRAS,PLCB1,RAF1,RAP2A,RRAS
Phospholipase C Signaling	1.24	0.155	CAMK4,CREB1,CREB3L1,EP300,GNB2,GNB4,GNG12,HDAC1,ITGAV,ITGB1,ITPR1,JMJD7-PLA2G4B,MAP2K2,MPRIP,MRAS,MYL12B,NAPEPLD,NRAS,PLCB1,PLD3,PRKD1,RAC3,RAF1,RAP2A,RELA,RHOBTB2,RHOT1,RHOT2,RRAS
fMLP Signaling in Neutrophils	1.23	0.172	ARPC1A,CAMK4,GNB2,GNB4,GNG12,ITPR1,MAP2K2,MRAS,NOX4,NRAS,PLCB1,PRKD1,RAC3,RAF1,RAP2A,RELA,RRAS
Renal Cell Carcinoma Signaling	1.23	0.188	AKT3,EP300,MAP2K2,MRAS,NRAS,PAK4,RAF1,RAP2A,RPS27A,RRAS,UBB,UBC
Ovarian Cancer Signaling	1.22	0.165	AKT3,BRCA2,CDKN2A,CTNNB1,DVL1,E2F4,FZD6,HDAC1,MAP2K2,MRAS,NRAS,PTEN,PTGS1,RAF1,RAP2A,RRAS,TCF4,VEGFB,WNT10B,WNT5A
Semaphorin Signaling in Neurons	1.2	0.196	DPYSL3,ITGB1,PAK4,PLXNA1,PLXNA3,RAC3,RHOBTB2,RHOT1,RHOT2,ROCK1
Endometrial Cancer Signaling	1.2	0.196	AKT3,BAD,CTNNB1,MAP2K2,MRAS,NRAS,PTEN,RAF1,RAP2A,RRAS
Thrombin Signaling	1.17	0.156	AKT3,ARHGEF39,CAMK1D,CAMK4,CREB1,F2RL2,GNB2,GNB4,GNG12,ITPR1,MAP2K2,MPRIP,MRAS,MYL12B,NRAS,PLCB1,PRKD1,RAC3,RAF1,RAP2A,RELA,RHOBTB2,RHOT1,RHOT2,ROCK1,RRAS
Pentose Phosphate Pathway (Non-oxidative Branch)	1.17	0.5	RPE,TKT
N-acetylglucosamine Degradation II	1.17	0.5	GNPDA1,GNPDA2
Role Of Osteoblasts In Rheumatoid Arthritis Signaling Pathway	1.17	0.162	AKT3,BMPR1A,CSNK1G2,CSNK1G3,CTNNB1,CTSA,CTSF,CTSK,CTSZ,DVL1,FZD6,LRP5,LRP6,MMP11,MMP17,SMAD5,SMAD9,TCF4,VEGFB,WNT10B,WNT5A
GDNF Family Ligand-Receptor Interactions	1.15	0.186	CREB1,FRS2,ITPR1,MAP2K2,MAPK8,MRAS,NRAS,RAF1,RAP2A,RASA1,RRAS
PCP (Planar Cell Polarity) Pathway	1.14	0.205	DVL1,DVL2,FZD6,LGR4,MAPK8,ROCK1,WNT10B,WNT5A
NAD Phosphorylation and Dephosphorylation	1.12	0.333	ACP1,ACP5,NADK2
Sirtuin Signaling Pathway	1.11	0.146	ABCA1,APP,ATG4B,ATG5,ATG7,ATG9A,ATP5F1A,ATP5F1E,ATP5PF,CRTC2,GABPB1,GTF3C2,HSF1,MT-ATP6,MT-CYB,MT-ND1,MT-ND2,MT-ND3,MT-ND4,MT-ND4L,MT-ND5,MT-ND6,NDUFA11,NDUFA4,NDUFA5,NDUFA6,PRKAA2,RELA,SIRT7,SLC25A6,SOD3,SP1,STK11,TSPO,UCP2,WRN
Agrin Interactions at Neuromuscular Junction	1.11	0.189	DVL1,GABPB1,ITGB1,MAPK8,MRAS,NRAS,PAK4,RAC3,RAP2A,RRAS
Actin Nucleation by ARP-WASP Complex	1.11	0.176	ARPC1A,BAIAP2,ITGAV,ITGB1,MRAS,NRAS,RAC3,RAP2A,RHOBTB2,RHOT1,RHOT2,ROCK1,RRAS
HIPPO signaling	1.11	0.176	ITCH,PPP1R10,PPP1R3C,PPP1R3D,PPP2R3B,SKP1,SMAD5,WWTR1,YAP1,YWHAB,YWHAE,YWHAH,YWHAZ
Coronavirus Pathogenesis Pathway	1.1	0.153	AR,ATP6AP1,CASP8,E2F4,EEF1A1,EP300,FAU,FURIN,HDAC1,IFNAR1,IRF9,MAPK8,RELA,RPS11,RPS13,RPS15A,RPS19,RPS20,RPS21,RPS23,RPS24,RPS25,RPS27A,RPS29,RPS9,RPSA
Glioma Signaling	1.1	0.165	AKT3,CAMK1D,CAMK4,CDK6,CDKN2A,CDKN2C,E2F4,HDAC1,MAP2K2,MDM2,MRAS,NRAS,PRKD1,PTEN,RAF1,RAP2A,RRAS
Maturity Onset Diabetes of Young (MODY) Signaling	1.08	0.222	APOD,APOE,APOL2,EP300,INSR,UCP2
Gαq Signaling	1.07	0.159	AKT3,CAMK4,GNB2,GNB4,GNG12,ITPR1,MAP2K2,MRAS,NAPEPLD,PLCB1,PLD3,PRKD1,RAC3,RAF1,RELA,RGS4,RHOBTB2,RHOT1,RHOT2,ROCK1
CSDE1 Signaling Pathway	1.07	0.191	AKT3,CDK11A,CTNNB1,DCP1A,EDC4,PTEN,RPL9,SYNCRIP,VIM
IL-2 Signaling	1.07	0.191	AKT3,CSNK2B,MAP2K2,MAPK8,MRAS,NRAS,RAF1,RAP2A,RRAS
Acute Myeloid Leukemia Signaling	1.07	0.173	AKT3,BAD,MAP2K2,MRAS,NRAS,PIM2,PML,RAF1,RAP2A,RELA,RRAS,RUNX1,TCF4
Toll-like Receptor Signaling	1.07	0.185	ECSIT,EIF2AK2,MAPK8,RELA,RPS27A,TAB2,TIRAP,TOLLIP,UBB,UBC
BEX2 Signaling Pathway	1.06	0.176	AKT3,BAD,CDH2,CTNNB1,MAPK8,PPP2R3B,PTEN,RELA,SMARCB1,SWAP70,TCF4,VEGFB
Mitotic Roles of Polo-Like Kinase	1.06	0.18	ANAPC13,CAPN1,CHEK2,ESPL1,KIF11,KIF23,PLK4,PPP2R3B,SLK,SMC3,WEE1
Granzyme A Signaling	1.06	0.18	MT-ND1,MT-ND2,MT-ND3,MT-ND4,MT-ND4L,MT-ND5,MT-ND6,NDUFA11,NDUFA4,NDUFA5,NDUFA6
Hepatic Fibrosis Signaling Pathway	1.05	0.142	ACVR1,ACVR1B,AKT3,BRD4,CAMK4,COL18A1,CREB1,CREB3L1,CSNK1G2,CSNK1G3,CTNNB1,DVL1,DVL2,FZD6,ITGAV,ITGB1,LRP5,LRP6,MAP2K2,MAPK8,MRAS,MYL12B,NOX4,NRAS,PRKD1,PTEN,RAC3,RAF1,RAP2A,RELA,RHOBTB2,RHOT1,RHOT2,ROCK1,RRAS,SP1,TCF4,TIRAP,VEGFB,WNT10B,WNT5A,YAP1
Cholecystokinin/Gastrin-mediated Signaling	1.05	0.167	ITPR1,MAP2K2,MAPK8,MRAS,NRAS,PLCB1,PRKD1,RAC3,RAF1,RAP2A,RHOBTB2,RHOT1,RHOT2,ROCK1,RRAS
Gα12/13 Signaling	1.02	0.165	AKT3,CDH2,CTNNB1,F2RL2,MAP2K2,MAPK8,MRAS,MYL12B,NRAS,RAF1,RAP2A,RASA1,RELA,ROCK1,RRAS
PPAR Signaling	0.998	0.169	EP300,INSR,MAP2K2,MRAS,NCOR1,NRAS,RAF1,RAP2A,RELA,RRAS,SCAND1,SNW1,SRA1
Glucocorticoid Receptor Signaling	0.996	0.138	AKT3,ANXA1,AR,ARID2,ATP5F1A,ATP5F1E,B2M,CREB1,EP300,GABPB1,GTF2A1,GTF2A2,GTF2F1,HLA-A,HSPA1A/HSPA1B,IFNAR1,IL17RE,JMJD7-PLA2G4B,MAP2K2,MAPK8,MRAS,MT-ATP6,MT-CYB,MT-ND1,MT-ND2,MT-ND3,MT-ND4,MT-ND4L,MT-ND5,MT-ND6,NCOR1,NDUFA11,NDUFA4,NDUFA5,NDUFA6,NRAS,PHF10,POLR2K,PRKAA2,RAF1,RAP2A,RELA,RRAS,SMARCB1,SMARCD1,SRA1,TAF11,TAF9B,YWHAH
NAD Salvage Pathway II	0.986	0.25	ACP1,ACP5,NMNAT1,NT5C3A
D-myo-inositol (1,3,4)-trisphosphate Biosynthesis	0.986	0.25	INPP5E,IPMK,ITPKC,PTEN
Basal Cell Carcinoma Signaling	0.986	0.19	BMP1,CTNNB1,DVL1,DVL2,FZD6,TCF4,WNT10B,WNT5A
IGF-1 Signaling	0.985	0.163	AKT3,BAD,CSNK2B,MAP2K2,MAPK8,MRAS,NRAS,RAF1,RAP2A,RASA1,RRAS,YWHAB,YWHAE,YWHAH,YWHAZ
VEGF Family Ligand-Receptor Interactions	0.982	0.179	AKT3,JMJD7-PLA2G4B,MAP2K2,MRAS,NRAS,PRKD1,RAF1,RAP2A,RRAS,VEGFB
Apelin Endothelial Signaling Pathway	0.979	0.159	AKT3,CAMK4,GNB2,GNB4,GNG12,MAP2K2,MAPK8,MRAS,NRAS,PLCB1,PRKAA2,PRKD1,RAF1,RAP2A,RELA,RRAS,SP1
Glutamate Receptor Signaling	0.964	0.207	CAMK4,GNB2,GNB4,GNG12,GRIN2C,HOMER3
NF-κB Activation by Viruses	0.948	0.172	AKT3,EIF2AK2,ITGAV,ITGB1,MRAS,NRAS,PRKD1,RAF1,RAP2A,RELA,RRAS
Estrogen-Dependent Breast Cancer Signaling	0.948	0.172	AKT3,CREB1,CREB3L1,DHRS11,HSD17B12,MRAS,NRAS,RAP2A,RELA,RRAS,SP1
GABA Receptor Signaling	0.948	0.172	GABBR1,GABRE,GNB2,GNB4,GNG12,ITPR1,MRAS,NSF,RPS27A,UBB,UBC
Thyroid Cancer Signaling	0.943	0.175	AKT3,CTNNB1,INSR,MAP2K2,MRAS,NRAS,PTEN,RAP2A,RRAS,TCF4
Alanine Biosynthesis III	0.939	1	NFS1
Breast Cancer Regulation by Stathmin1	0.924	0.139	ADGRE5,ADGRF4,ADGRL4,AURKB,CAMK1D,CAMK4,CDK6,CMKLR2,CREB1,CREB3L1,E2F4,F2RL2,FOXM1,FZD6,GABBR1,GNB2,GNB4,GNG12,GPR137,GPR4,LGR4,LTB4R,LTB4R2,MAP2K2,MRAS,NRAS,PLCB1,PPP1R10,PPP1R3C,PPP1R3D,PPP2R3B,PPP4C,PRKD1,RAC3,RAF1,RAP2A,RLIM,RRAS,VEGFB
p70S6K Signaling	0.91	0.157	AKT3,BAD,F2RL2,MAP2K2,MRAS,NRAS,PLCB1,PPP2R3B,PRKD1,RAF1,RAP2A,RRAS,YWHAB,YWHAE,YWHAH,YWHAZ
Cardiomyocyte Differentiation via BMP Receptors	0.906	0.273	BMPR1A,SMAD5,SMAD9
Glioma Invasiveness Signaling	0.905	0.172	HMMR,ITGAV,MRAS,NRAS,RAC3,RAP2A,RHOBTB2,RHOT1,RHOT2,RRAS
ERBB4 Signaling	0.899	0.176	APH1B,MAP2K2,MRAS,NRAS,PRKD1,RAF1,RAP2A,RRAS,YAP1
Endocannabinoid Cancer Inhibition Pathway	0.887	0.153	AKT3,BAD,CAMKK2,CASP4,CASP6,CASP7,CASP8,CREB1,CREB3L1,CTNNB1,MAP2K2,PRKAA2,RAF1,ROCK1,TCF4,TRPV1,VEGFB,VIM
Cytotoxic T Lymphocyte-mediated Apoptosis of Target Cells	0.872	0.208	B2M,CASP6,CASP7,CASP8,HLA-A
Integrin Signaling	0.869	0.145	AKT3,ARHGAP5,ARPC1A,CAPN1,CAPNS1,ITGAV,ITGB1,MAP2K2,MAP3K11,MAPK8,MPRIP,MRAS,MYL12B,NRAS,PAK4,PTEN,RAC3,RAF1,RAP2A,RHOBTB2,RHOT1,RHOT2,ROCK1,RRAS
Oxytocin In Brain Signaling Pathway	0.862	0.151	AKT3,CAMK4,CAMKK2,CREB1,CREB3L1,GNB2,GNB4,GNG12,ITPR1,MAP2K2,MRAS,NRAS,PRKD1,PTGS1,RAF1,RAP2A,RRAS,TRPV1
ERB2-ERBB3 Signaling	0.861	0.173	BAD,MAP2K2,MRAS,NRAS,PTEN,RAF1,RAP2A,RRAS,SP1
PEDF Signaling	0.857	0.162	AKT3,CASP7,CASP8,CFLAR,MRAS,NRAS,RAF1,RAP2A,RELA,ROCK1,RRAS,TCF4
UVC-Induced MAPK Signaling	0.855	0.178	MAP2K2,MAPK8,MRAS,NRAS,PRKD1,RAF1,RAP2A,RRAS
SAPK/JNK Signaling	0.854	0.157	DAXX,GNB2,GNB4,GNG12,MAP3K11,MAP3K2,MAP4K2,MAP4K5,MAPK8,MRAS,NRAS,RAC3,RAP2A,RRAS
GNRH Signaling	0.847	0.148	CAMK4,CREB1,CREB3L1,GNB2,GNB4,GNG12,ITPR1,MAP2K2,MAP3K11,MAP3K2,MAPK8,MRAS,NRAS,PAK4,PLCB1,PRKD1,RAF1,RAP2A,RELA,RRAS
P2Y Purigenic Receptor Signaling Pathway	0.842	0.155	AKT3,CREB1,CREB3L1,GNB2,GNB4,GNG12,MAP2K2,MRAS,NRAS,PLCB1,PRKD1,RAF1,RAP2A,RELA,RRAS
Non-Small Cell Lung Cancer Signaling	0.84	0.159	AKT3,BAD,CDK6,CDKN2A,E2F4,HDAC1,ITPR1,MAP2K2,MRAS,NRAS,RAF1,RAP2A,RRAS
Tumoricidal Function of Hepatic Natural Killer Cells	0.839	0.222	CASP6,CASP7,CASP8,M6PR
Role of JAK1, JAK2 and TYK2 in Interferon Signaling	0.839	0.222	IFNAR1,IFNGR1,RAF1,RELA
PTEN Signaling	0.838	0.15	AKT3,BAD,BMPR1A,CBL,CSNK2B,INSR,ITGAV,ITGB1,MAP2K2,MRAS,NRAS,PTEN,RAC3,RAF1,RAP2A,RELA,RRAS,YWHAH
Role of Macrophages, Fibroblasts and Endothelial Cells in Rheumatoid Arthritis	0.835	0.141	AKT3,C5,CAMK4,CREB1,CREB3L1,CSNK1G2,CSNK1G3,CTNNB1,DKK3,DVL1,FZD6,LRP5,LRP6,MAP2K2,MAPKAPK2,MRAS,NRAS,PLCB1,PRKD1,RAF1,RAP2A,RELA,ROCK1,RRAS,TCF4,TRAF5,VEGFB,WNT10B,WNT5A
Ephrin B Signaling	0.834	0.167	ACP1,CBL,CTNNB1,GNB2,GNB4,GNG12,MRAS,RAC3,RGS3,ROCK1
Pulmonary Fibrosis Idiopathic Signaling Pathway	0.829	0.138	ACVR1,ACVR1B,AKT3,CDH2,COL15A1,COL16A1,COL18A1,COL6A1,COL6A2,CTNNB1,EP300,FZD6,ITGAV,ITGB1,MAPK8,MMP11,MMP17,MRAS,NOX4,NRAS,PTEN,RAF1,RAP2A,RBPJ,RELA,ROCK1,RRAS,TCF4,THBS1,VIM,WNT10B,WNT5A,WWTR1,YAP1
Antiproliferative Role of Somatostatin Receptor 2	0.823	0.17	GNB2,GNB4,GNG12,MAP2K2,MRAS,NRAS,RAP2A,RRAS,SLC39A7
Insulin Receptor Signaling	0.822	0.15	AKT3,BAD,CBL,INSR,LIPE,MAP2K2,MAPK8,MRAS,NRAS,PPP1R10,PPP1R3C,PPP1R3D,PTEN,RAF1,RAP2A,RRAS,STXBP4
TNFR1 Signaling	0.815	0.174	CASP6,CASP7,CASP8,MAP4K2,MAPK8,PAK4,RELA,XIAP
Protein Kinase A Signaling	0.814	0.136	ACP1,AKAP11,AKAP12,AKAP5,ANAPC13,BAD,CAMK4,CREB1,CREB3L1,CTNNB1,DUSP18,GNB2,GNB4,GNG12,HHAT,ITPR1,LIPE,MAP2K2,MYL12B,NAPEPLD,PHKA2,PHKB,PHKG2,PLCB1,PPP1R10,PPP1R3C,PPP1R3D,PRKD1,PTEN,RAF1,RELA,ROCK1,TCF4,TDP2,YWHAB,YWHAE,YWHAH,YWHAZ
Regulation of Actin-based Motility by Rho	0.811	0.157	ARPC1A,BAIAP2,ITGAV,ITGB1,MPRIP,MYL12B,PAK4,PIP4K2C,RAC3,RHOBTB2,RHOT1,RHOT2,ROCK1
G Protein Signaling Mediated by Tubby	0.808	0.188	GNB2,GNB4,GNG12,INSR,MRAS,PLCB1
Regulation of the Epithelial-Mesenchymal Transition Pathway	0.803	0.146	AKT3,APH1B,CDH2,CTNNB1,DVL1,DVL2,FGF1,FRS2,FZD6,MAP2K2,MRAS,NRAS,RAF1,RAP2A,RBPJ,RELA,RRAS,TCF4,WNT10B,WNT5A
Neurotrophin/TRK Signaling	0.8	0.164	CREB1,CREB3L1,FRS2,MAP2K2,MAPK8,MRAS,NRAS,RAF1,RAP2A,RRAS
Neuroprotective Role of THOP1 in Alzheimer's Disease	0.768	0.175	APP,CREB1,FAP,HLA-A,HTRA1,PRSS53,YWHAE
Regulation of Cellular Mechanics by Calpain Protease	0.768	0.161	CAPN1,CAPNS1,CCNA2,CDK6,ITGAV,ITGB1,MRAS,NRAS,RAP2A,RRAS
Human Embryonic Stem Cell Pluripotency	0.765	0.15	ACVR1,AKT3,BMP1,BMPR1A,CTNNB1,DVL1,FZD6,GNB2,GNB4,GNG12,MRAS,SMAD5,TCF4,WNT10B,WNT5A
Osteoarthritis Pathway	0.755	0.142	BMPR1A,CASP4,CASP6,CASP7,CASP8,CREB1,CREB3L1,CTNNB1,FZD6,GREM1,HTRA1,ITGAV,ITGB1,PRKAA2,RBPJ,RELA,SMAD5,SMAD9,SOX9,SP1,TCF4,VEGFB
GM-CSF Signaling	0.754	0.164	AKT3,MAP2K2,MRAS,NRAS,RACK1,RAF1,RAP2A,RRAS,RUNX1
FLT3 Signaling in Hematopoietic Progenitor Cells	0.752	0.157	AKT3,BAD,CBL,CREB1,CREB3L1,MAP2K2,MRAS,NRAS,RAF1,RAP2A,RRAS
Signaling by Rho Family GTPases	0.749	0.138	ARPC1A,BAIAP2,CDH2,DIAPH3,GNB2,GNB4,GNG12,ITGAV,ITGB1,MAP2K2,MAP3K11,MAPK8,MRAS,MYL12B,NOX4,PAK4,PIP4K2C,PKN1,RAC3,RAF1,RDX,RELA,RHOBTB2,RHOT1,RHOT2,ROCK1,VIM
Endocannabinoid Developing Neuron Pathway	0.74	0.149	AKT3,CREB1,CREB3L1,CTNNB1,GNB2,GNB4,GNG12,MAP2K2,MAPK8,MRAS,NRAS,RAC3,RAF1,RAP2A,RRAS
RANK Signaling in Osteoclasts	0.74	0.154	AKT3,CAMK4,CBL,MAP2K2,MAP3K11,MAP3K2,MAPK8,RAF1,RELA,TAB2,TRAF5,XIAP
Neuroinflammation Signaling Pathway	0.733	0.14	ACVR1,ACVR1B,AKT3,APH1B,APP,B2M,CASP8,CFLAR,CREB1,CREB3L1,CTNNB1,GABBR1,GABRE,GRIN2C,HLA-A,IFNGR1,JMJD7-PLA2G4B,MAPK8,MFGE8,NOX4,RAC3,RELA,TIRAP,XIAP
FAK Signaling	0.732	0.133	ACVR1,ACVR1B,ADGRE5,ADGRF4,ADGRL4,AKT3,ARPC1A,BAD,CAPN1,CAPNS1,CMKLR2,COL18A1,CTNNB1,EFNA4,EFNA5,F2RL2,FZD6,GABBR1,GPR137,GPR4,IFNAR1,IL17RE,ITGAV,ITGB1,LGR4,LTB4R,LTB4R2,MAP2K2,MAPK8,MDM2,MRAS,NRAS,PAK4,PTEN,RAF1,RAP2A,RASA1,RRAS,SP1,TCF4,USF1
SPINK1 General Cancer Pathway	0.729	0.171	AKT3,MAP2K2,MRAS,NRAS,RAF1,RAP2A,RRAS
Apelin Muscle Signaling Pathway	0.72	0.176	AKT3,GNB2,GNB4,GNG12,MRAS,PRKAA2
HIF1α Signaling	0.719	0.141	AKT3,CAMK1D,CAMK4,EP300,HSPA1A/HSPA1B,KDM1A,MAP2K2,MDM2,MMP11,MMP17,MRAS,NOX4,NRAS,PRKD1,RAC3,RACK1,RAF1,RAP2A,RRAS,VEGFB,VIM
Adipogenesis pathway	0.712	0.145	ATG5,ATG7,BMPR1A,CTNNB1,FGF1,FZD6,HDAC1,KDM1A,KMT2B,SAP130,SMAD5,SMAD9,SOX9,TXNIP,WNT10B,WNT5A
Regulation Of The Epithelial Mesenchymal Transition In Development Pathway	0.706	0.156	APH1B,CTNNB1,DVL1,DVL2,FZD6,RBPJ,RELA,TCF4,WNT10B,WNT5A
WNT/Ca+ pathway	0.706	0.163	CREB1,CREB3L1,DVL1,DVL2,FZD6,PLCB1,RELA,WNT5A
T Cell Receptor Signaling	0.705	0.143	AKT3,B2M,BCL10,CAMK4,CBL,CTNNB1,HLA-A,ITGB1,MAP2K2,MAPK8,MRAS,NRAS,RAF1,RAP2A,RASA1,RELA,RRAS,TCF4
Ribonucleotide Reductase Signaling Pathway	0.701	0.141	AKT3,ARID2,BAD,CDK6,CDKN2A,CREB1,CREB3L1,CTNNB1,E2F4,FOXM1,MAPK8,NFYC,NRAS,PHF10,SKP1,SMARCB1,SMARCD1,SP1,THBS1,WEE1
Opioid Signaling Pathway	0.698	0.137	AKT3,BAD,CAMK1D,CAMK4,CREB1,CREB3L1,CTNNB1,EP300,GNB2,GNB4,GNG12,GRIN2C,ITPR1,MAP2K2,MRAS,NRAS,PLCB1,PRKD1,RAC3,RAF1,RAP2A,RGS3,RGS4,RRAS,TCF4
PDGF Signaling	0.695	0.153	ACP1,CSNK2B,EIF2AK2,MAP2K2,MAPK8,MRAS,NRAS,RAF1,RAP2A,RASA1,RRAS
Gap Junction Signaling	0.683	0.141	AKT3,CSNK1G2,CSNK1G3,CTNNB1,DBN1,ITPR1,MAP2K2,MAP3K2,MRAS,NRAS,PLCB1,PRKD1,RAF1,RAP2A,RRAS,SLC39A7,SP1,SP3,TJP1
Xenobiotic Metabolism General Signaling Pathway	0.675	0.146	AHR,AKT3,EP300,GSTP1,MAP2K2,MAP3K11,MAP3K2,MAPK8,MRAS,NRAS,PRKD1,RAF1,RAP2A,RRAS
Erythropoietin Signaling Pathway	0.671	0.144	AKT3,BAD,CTNNB1,ITPR1,MAP2K2,MDM2,MRAS,NRAS,PRKD1,RAC3,RAF1,RAP2A,RELA,RRAS,XIAP
PI3K Signaling in B Lymphocytes	0.671	0.144	AKT3,BCL10,CAMK4,CBL,CREB1,ITPR1,MAP2K2,MRAS,NRAS,PLCB1,PTEN,RAF1,RAP2A,RELA,RRAS
nNOS Signaling in Neurons	0.669	0.179	CAMK4,CAPN1,CAPNS1,GRIN2C,PRKD1
Role of NFAT in Regulation of the Immune Response	0.665	0.141	AKAP5,AKT3,CAMK4,CSNK1G2,CSNK1G3,GNB2,GNB4,GNG12,HLA-A,ITPR1,MAP2K2,MRAS,NRAS,PLCB1,RAF1,RAP2A,RELA,RRAS
Superpathway of D-myo-inositol (1,4,5)-trisphosphate Metabolism	0.664	0.19	INPP5E,IPMK,ITPKC,PTEN
S-adenosyl-L-methionine Biosynthesis	0.664	0.5	MAT2B
L-serine Degradation	0.664	0.5	SDSL
Neuregulin Signaling	0.657	0.146	AKT3,BAD,ERBIN,ITGAV,ITGB1,MAP2K2,MRAS,NRAS,PRKD1,PTEN,RAF1,RAP2A,RRAS
Chronic Myeloid Leukemia Signaling	0.653	0.144	AKT3,BAD,CDK6,CDKN2A,E2F4,HDAC1,MAP2K2,MDM2,MRAS,NRAS,RAF1,RAP2A,RELA,RRAS
Systemic Lupus Erythematosus In B Cell Signaling Pathway	0.646	0.137	AKT3,BAD,BCL10,CAMK4,CBL,CTNNB1,IFIT3,IFNAR1,IFNGR1,IRF9,MAP2K2,MRAS,NRAS,PIM2,PRKD1,RAC3,RAF1,RAP2A,RELA,RRAS,TNFRSF13C,TRAF5
Calcium-induced T Lymphocyte Apoptosis	0.641	0.167	CAMK4,EP300,HDAC1,HLA-A,ITPR1,PRKD1
Oncostatin M Signaling	0.641	0.167	MAP2K2,MRAS,NRAS,RAF1,RAP2A,RRAS
TWEAK Signaling	0.641	0.167	BAG4,CASP6,CASP7,CASP8,RELA,XIAP
Axonal Guidance Signaling	0.636	0.129	ADAM12,ADAM15,ADAMTS6,AKT3,ARPC1A,BAIAP2,BMP1,EFNA4,EFNA5,EIF3F,EPHA5,FZD6,GNB2,GNB4,GNG12,ITGAV,ITGB1,LNPEP,MAP2K2,MMP11,MMP17,MRAS,MYL12B,NRAS,NTNG1,PAK4,PLCB1,PLXNA1,PLXNA3,PRKD1,RAC3,RAF1,RAP2A,RASA1,RGS3,ROCK1,RRAS,SEMA3C,SEMA4C,SEMA5A,VEGFB,WNT10B,WNT5A
Pentose Phosphate Pathway	0.633	0.25	RPE,TKT
Autophagy	0.633	0.134	AKT3,ATG4B,ATG5,ATG7,ATG9A,BAD,CAMK4,CAMKK2,CREB1,CREB3L1,DAPK2,ERN1,INSR,LAMP1,MAP2K2,MAPK8,PPP2R3B,PRKAA2,PTEN,RAF1,SLC7A5,SQSTM1,STK11,VPS18,VPS41
Angiopoietin Signaling	0.631	0.153	AKT3,BAD,MRAS,NRAS,PAK4,RAP2A,RASA1,RELA,RRAS
RAR Activation	0.628	0.136	AKR1B1,AKT3,ARID2,CSNK2B,EP300,MAPK8,MAPKAPK2,NCOR1,PHF10,PML,PRKD1,PTEN,RELA,SCAND1,SMAD5,SMAD9,SMARCB1,SMARCD1,SNW1,SORBS3,SRA1
PI3K/AKT Signaling	0.628	0.136	AKT3,BAD,CTNNB1,IFNAR1,IL17RE,ITGAV,ITGB1,MAP2K2,MDM2,MRAS,NRAS,PPP2R3B,PTEN,RAF1,RAP2A,RELA,RRAS,YWHAB,YWHAE,YWHAH,YWHAZ
CTLA4 Signaling in Cytotoxic T Lymphocytes	0.627	0.139	AHR,AKT3,AP1M1,AP1S1,B2M,BCL10,HLA-A,ITGB1,MAPK8,MRAS,NAPEPLD,NRAS,PLD3,PPP2R3B,RAC3,RAP2A,RRAS
HER-2 Signaling in Breast Cancer	0.617	0.134	AKT3,BAD,CASP6,CASP7,COX6B1,COX6C,COX7A2,ITGB1,MAP2K2,MDM2,MRAS,MT-CO1,MT-CO2,MT-CO3,MTCL1,NRAS,POM121/POM121C,PRKD1,PTEN,RAF1,RAP2A,RELA,RRAS,SP1,XIAP
Virus Entry via Endocytic Pathways	0.614	0.145	AP1M1,AP1S1,B2M,CD55,HLA-A,ITGB1,MRAS,NRAS,PRKD1,RAC3,RAP2A,RRAS
Methylglyoxal Degradation III	0.611	0.2	AKR1A1,AKR1B1,DHRS11
G-Protein Coupled Receptor Signaling	0.605	0.128	ADGRE5,ADGRF4,ADGRL4,AKT3,CAMK4,CMKLR2,CREB1,CREB3L1,CTNNB1,F2RL2,FZD6,GABBR1,GNB2,GNB4,GNG12,GPR137,GPR4,HCN2,HCN3,LGR4,LTB4R,LTB4R2,MAP2K2,MAP3K11,MAP3K2,MAPK8,MEGF6,MRAS,MYL12B,NAPEPLD,NRAS,PAK4,PLCB1,RAC3,RAF1,RAP2A,RASA1,RELA,RGS4,ROCK1,RRAS,TDP2,WWTR1,YAP1
Caveolar-mediated Endocytosis Signaling	0.603	0.15	ARCN1,B2M,CD55,FLOT1,HLA-A,INSR,ITGAV,ITGB1,MAP3K2
IL-15 Signaling	0.603	0.15	AKT3,MAP2K2,MRAS,NRAS,RAC3,RAF1,RAP2A,RELA,RRAS
Hypoxia Signaling in the Cardiovascular System	0.597	0.147	CREB1,CREB3L1,EP300,MDM2,P4HB,PTEN,UBE2D1,UBE2R2,UBE2S,UBE2W
Actin Cytoskeleton Signaling	0.596	0.134	ARPC1A,BAIAP2,DIAPH3,FGF1,GNG12,ITGAV,ITGB1,MAP2K2,MPRIP,MRAS,MYL12B,NCKAP1,NRAS,PAK4,RAC3,RAF1,RAP2A,RDX,ROCK1,RRAS,SSH2,TMSB10/TMSB4X
Fc Epsilon RI Signaling	0.593	0.145	AKT3,JMJD7-PLA2G4B,MAP2K2,MAPK8,MRAS,NRAS,PRKD1,RAC3,RAF1,RAP2A,RRAS
Synaptogenesis Signaling Pathway	0.592	0.132	AKT3,APOE,ARPC1A,BAD,BET1L,CAMK4,CDH2,CREB1,CREB3L1,CTNNB1,EFNA4,EFNA5,EPHA5,GRIN2C,ITPR1,MRAS,NAPG,NRAS,NRXN3,NSF,RAF1,RAP2A,RRAS,STX1B,STXBP4,THBS1,YKT6
STAT3 Pathway	0.589	0.141	BMPR1A,IFNAR1,IL17RE,INSR,MAP2K2,MAP3K11,MAPK8,MRAS,NRAS,PIAS3,RAF1,RAP2A,RRAS
HMGB1 Signaling	0.588	0.139	AKT3,IFNGR1,MAP2K2,MAPK8,MRAS,NRAS,PLAT,RAC3,RAP2A,RELA,RHOBTB2,RHOT1,RHOT2,RRAS,SP1
Polyamine Regulation in Colon Cancer	0.582	0.151	AKT3,CSNK2B,CTNNB1,DHPS,MAP2K2,OAZ1,RAF1,TCF4
ERK/MAPK Signaling	0.578	0.134	BAD,CREB1,CREB3L1,ITGAV,ITGB1,JMJD7-PLA2G4B,MAP2K2,MRAS,NRAS,PAK4,PPP1R10,PPP1R3C,PPP1R3D,PPP2R3B,RAC3,RAF1,RAP2A,RRAS,YWHAB,YWHAH,YWHAZ
Immunogenic Cell Death Signaling Pathway	0.576	0.148	ANXA1,ATG5,CASP8,CFLAR,DAPK2,HSPA1A/HSPA1B,IFNAR1,IFNGR1,ROCK1
FGF Signaling	0.576	0.148	AKT3,CREB1,CREB3L1,FGF1,FRS2,ITPR1,MAPK8,MAPKAPK2,RAF1
VEGF Signaling	0.57	0.143	AKT3,BAD,MAP2K2,MRAS,NRAS,RAF1,RAP2A,ROCK1,RRAS,VEGFB,YWHAE
CDK5 Signaling	0.568	0.14	CAPN1,ITGB1,MAP2K2,MAPK8,MRAS,NRAS,PPP1R10,PPP1R3C,PPP1R3D,PPP2R3B,RAF1,RAP2A,RRAS
1D-myo-inositol Hexakisphosphate Biosynthesis II (Mammalian)	0.557	0.188	INPP5E,IPMK,ITPKC
Role of MAPK Signaling in the Pathogenesis of Influenza	0.555	0.148	AKT3,MAP2K2,MAPK8,MRAS,NRAS,RAF1,RAP2A,RRAS
Semaphorin Neuronal Repulsive Signaling Pathway	0.55	0.136	AKT3,DPYSL3,ITGAV,ITGB1,MAP2K2,MPRIP,MYL12B,PAK4,PLXNA1,PLXNA3,ROCK1,RRAS,SEMA5A,SMC3,STK11
OX40 Signaling Pathway	0.55	0.161	B2M,HLA-A,MAPK8,RELA,TRAF5
Interferon Signaling	0.55	0.161	IFIT3,IFNAR1,IFNGR1,IRF9,RELA
Gαi Signaling	0.548	0.141	GABBR1,GNB2,GNB4,GNG12,LTB4R,MRAS,NRAS,RAF1,RAP2A,RGS4,RRAS
CREB Signaling in Neurons	0.546	0.128	ADGRE5,ADGRF4,ADGRL4,AKT3,BMPR1A,CAMK4,CMKLR2,CREB1,CREB3L1,EP300,F2RL2,FZD6,GABBR1,GNB2,GNB4,GNG12,GPR137,GPR4,GRIN2C,INSR,ITPR1,LGR4,LTB4R,LTB4R2,MAP2K2,MRAS,NRAS,PLCB1,POLR2K,PRKD1,RAF1,RAP2A,RRAS
Oxytocin Signaling Pathway	0.541	0.13	AKT3,CAMK4,CAMKK2,CREB1,CREB3L1,GNB2,GNB4,GNG12,ITPR1,JMJD7-PLA2G4B,LIPE,MAPK8,MPRIP,MRAS,NRAS,PLCB1,PRKAA2,PRKD1,RAF1,RAP2A,RELA,ROCK1,RRAS,SLC39A7
Production of Nitric Oxide and Reactive Oxygen Species in Macrophages	0.539	0.133	AKT3,APOD,APOE,CYBA,IFNGR1,MAP3K11,MAP3K2,MAPK8,PPP1R10,PPP1R3C,PPP1R3D,PPP2R3B,PRKD1,RAC3,RELA,RHOBTB2,RHOT1,RHOT2
IL-3 Signaling	0.526	0.143	AKT3,BAD,MAP2K2,MRAS,NRAS,PRKD1,RAF1,RAP2A,RRAS
Germ Cell-Sertoli Cell Junction Signaling	0.522	0.132	CDH2,CTNNB1,ITGB1,MAP2K2,MAP3K11,MAP3K2,MAPK8,MRAS,NECTIN2,NRAS,PAK4,RAC3,RAP2A,RHOBTB2,RHOT1,RHOT2,RRAS,TJP1
Serine Biosynthesis	0.513	0.333	UBAC2
Coenzyme A Biosynthesis	0.513	0.333	COASY
NAD Salvage Pathway III	0.513	0.333	NMNAT1
D-glucuronate Degradation I	0.513	0.333	AKR1A1
Hypusine Biosynthesis	0.513	0.333	DHPS
1D-myo-inositol Hexakisphosphate Biosynthesis V (from Ins(1,3,4)P3)	0.513	0.333	IPMK
NAD Biosynthesis III	0.513	0.333	NMNAT1
CDC42 Signaling	0.511	0.135	ARPC1A,B2M,BAIAP2,DIAPH3,HLA-A,ITGAV,ITGB1,MAP3K11,MAPK8,MPRIP,MYL12B,PAK4,RAF1,RASA1
NGF Signaling	0.511	0.135	AKT3,CREB1,CREB3L1,MAP2K2,MAP3K11,MAP3K2,MAPK8,MRAS,NRAS,RAF1,RAP2A,RELA,ROCK1,RRAS
RHOGDI Signaling	0.51	0.131	ARHGAP5,ARPC1A,CDH2,EP300,GNB2,GNB4,GNG12,ITGAV,ITGB1,MRAS,MYL12B,PAK4,PIP4K2C,RAC3,RDX,RHOBTB2,RHOT1,RHOT2,ROCK1
NUR77 Signaling in T Lymphocytes	0.503	0.143	B2M,CAMK4,EP300,HDAC1,HLA-A,MAP2K2,MAP3K2,PRKD1
Choline Biosynthesis III	0.491	0.2	NAPEPLD,PLD3
Guanosine Nucleotides Degradation III	0.491	0.2	NT5C3A,XDH
UDP-N-acetyl-D-galactosamine Biosynthesis II	0.491	0.2	GNPDA1,GNPDA2
Xenobiotic Metabolism Signaling	0.483	0.128	AHR,CAMK1D,CAMK4,CES4A,CHST12,EP300,GSTP1,MAP2K2,MAP3K11,MAP3K2,MAPK8,MRAS,NRAS,PPP2R3B,PRKD1,RAF1,RAP2A,RELA,RRAS,SCAND1,SNW1,SOD3,SRA1
MSP-RON Signaling In Macrophages Pathway	0.481	0.138	CREB1,CREB3L1,ETV3,IFNGR1,MRAS,NRAS,RAP2A,RELA,RRAS
Wound Healing Signaling Pathway	0.48	0.129	ACVR1,ACVR1B,COL15A1,COL16A1,COL18A1,COL6A1,COL6A2,IFNGR1,ITGB1,MAP2K2,MAPK8,MRAS,NRAS,RAF1,RAP2A,RRAS,TRPV1,VEGFB,VIM
HGF Signaling	0.476	0.132	AKT3,CDKN2A,ITGAV,ITGB1,MAP2K2,MAP3K11,MAP3K2,MAPK8,MRAS,NRAS,PRKD1,RAF1,RAP2A,RRAS
Endothelin-1 Signaling	0.468	0.13	CASP4,CASP6,CASP7,CASP8,ITPR1,MAPK8,MRAS,NAPEPLD,NRAS,PLCB1,PLD3,PRKD1,PTGS1,RAF1,RAP2A,RRAS
Role of MAPK Signaling in Promoting the Pathogenesis of Influenza	0.465	0.134	ATP6AP1,ATP6AP2,ATP6V0A2,ATP6V0E2,MAP2K2,MAPK8,MRAS,NRAS,RAF1,RAP2A,RRAS
Tumor Microenvironment Pathway	0.464	0.13	AKT3,BAD,CFLAR,FGF1,HLA-A,MAP2K2,MMP11,MMP17,MRAS,NRAS,RAF1,RAP2A,RELA,RRAS,VEGFB
LPS-stimulated MAPK Signaling	0.462	0.135	CREB1,MAP2K2,MAPK8,MRAS,NRAS,PRKD1,RAF1,RAP2A,RELA,RRAS
Regulation of IL-2 Expression in Activated and Anergic T Lymphocytes	0.462	0.135	BCL10,CAMK4,MAP2K2,MAPK8,MRAS,NRAS,RAF1,RAP2A,RELA,RRAS
Phagosome Formation	0.459	0.124	ADGRE5,ADGRF4,ADGRL4,AKT3,AP1M1,AP1S1,ARPC1A,BCL10,CMKLR2,F2RL2,FZD6,GABBR1,GPR137,GPR4,ITGAV,ITGB1,ITPR1,LGR4,LTB4R,LTB4R2,MAP2K2,MRAS,MRC2,MYL12B,NAPEPLD,NRAS,PAK4,PIP4K2C,PLD3,PRKD1,RAC3,RAF1,RAP2A,ROCK1,RRAS,SAP130
Cardiac Hypertrophy Signaling	0.457	0.126	CAMK4,CREB1,EP300,GNB2,GNB4,GNG12,MAP2K2,MAP3K11,MAP3K2,MAPK8,MAPKAPK2,MRAS,MYL12B,NRAS,PLCB1,RAC3,RAF1,RAP2A,RHOBTB2,RHOT1,RHOT2,ROCK1,RRAS
Thrombopoietin Signaling	0.454	0.14	MAP2K2,MRAS,NRAS,PRKD1,RAF1,RAP2A,RRAS
FAT10 Cancer Signaling Pathway	0.452	0.143	ACVR1,ACVR1B,AKT3,CTNNB1,EEF1A1,RELA
Role of IL-17F in Allergic Inflammatory Airway Diseases	0.452	0.147	CREB1,CREB3L1,MAP2K2,RAF1,RELA
Telomerase Signaling	0.451	0.132	AKT3,HDAC1,MAP2K2,MRAS,NRAS,POT1,PPP2R3B,RAF1,RAP2A,RRAS,SP1,TINF2
Necroptosis Signaling Pathway	0.443	0.13	CAPN1,CAPNS1,CASP8,CFLAR,EIF2AK2,IFNAR1,IRF9,JMJD7-PLA2G4B,MDM2,SLC25A6,TAB2,TNFRSF10B,TSPO,UBC
Clathrin-mediated Endocytosis Signaling	0.442	0.128	AP1M1,AP1S1,APOD,APOE,ARPC1A,CBL,CD2AP,CSNK2B,DAB2,FGF1,HIP1,ITGB1,MDM2,RPS27A,UBB,UBC,VEGFB
Allograft Rejection Signaling	0.436	0.182	B2M,HLA-A
CD27 Signaling in Lymphocytes	0.43	0.137	CASP8,MAP2K2,MAP3K11,MAP3K2,MAPK8,RELA,TRAF5
G Beta Gamma Signaling	0.429	0.131	AKT3,GNB2,GNB4,GNG12,ITPR1,MRAS,NRAS,PRKD1,RAF1,RAP2A,RRAS
Ceramide Signaling	0.424	0.132	AKT3,BAD,MAPK8,MRAS,NRAS,PPP2R3B,RAF1,RAP2A,RELA,RRAS
Role of Lipids/Lipid Rafts in the Pathogenesis of Influenza	0.412	0.25	IFNAR1
Arsenate Detoxification I (Glutaredoxin)	0.412	0.25	GLRX2
NAD Biosynthesis from 2-amino-3-carboxymuconate Semialdehyde	0.412	0.25	NMNAT1
Molybdenum Cofactor Biosynthesis	0.412	0.25	NFS1
PAK Signaling	0.411	0.129	ITGAV,ITGB1,MAP2K2,MAPK8,MRAS,MYL12B,NRAS,PAK4,RAF1,RAP2A,RRAS
Androgen Signaling	0.409	0.126	AR,CAMK4,EP300,GNB2,GNB4,GNG12,GTF2A1,GTF2A2,GTF2F1,ITPR1,MRAS,POLR2K,PRKD1,RELA,TAF11,TAF9B
Neurovascular Coupling Signaling Pathway	0.406	0.127	APP,CAMK4,ENTPD7,GABBR1,GABRE,GRIN2C,ITPR1,MPRIP,ORAI2,PLCB1,PTGS1,ROCK1,SLC39A7
IL-12 Signaling and Production in Macrophages	0.405	0.13	AKT3,APOD,APOE,EP300,IFNGR1,JMJD6,MAP2K2,MAPK8,PRKD1,RELA
BER (Base Excision Repair) Pathway	0.402	0.136	CDKN2A,HUWE1,MAP2K2,POLB,POLG,SP1
Amyloid Processing	0.402	0.136	AKT3,APH1B,APP,CAPN1,CAPNS1,CSNK2B
Senescence Pathway	0.397	0.122	ACVR1,ACVR1B,AKT3,ANAPC13,ASXL2,CAMK4,CAPN1,CAPNS1,CBX8,CDK6,CDKN2A,CHEK2,E2F4,EP300,MAP2K2,MAPKAPK2,MDM2,MRAS,NRAS,PML,PPP2R3B,PTEN,RAF1,RAP2A,RNF2,RRAS,SMAD5,SMAD9,SQSTM1
Oxytocin In Spinal Neurons Signaling Pathway	0.388	0.15	CAMKK2,SLC39A7,TRPV1
Transcriptional Regulatory Network in Embryonic Stem Cells	0.388	0.15	REST,RIF1,SMARCAD1
Methionine Degradation I (to Homocysteine)	0.388	0.15	ALKBH8,MAT2B,THUMPD3
Endoplasmic Reticulum Stress Pathway	0.388	0.15	CASP7,ERN1,MAPK8
Urate Biosynthesis/Inosine 5'-phosphate Degradation	0.387	0.167	NT5C3A,XDH
Adenosine Nucleotides Degradation II	0.387	0.167	NT5C3A,XDH
Cell Cycle Control of Chromosomal Replication	0.386	0.132	CDK11A,CDK14,CDK16,CDK6,CHEK2,DBF4,ORC3
Dopamine-DARPP32 Feedback in cAMP Signaling	0.383	0.125	CAMK4,CAMKK2,CREB1,CREB3L1,CSNK1G2,CSNK1G3,GRIN2C,ITPR1,PLCB1,PPP1R10,PPP1R3C,PPP1R3D,PPP2R3B,PRKD1
Tight Junction Signaling	0.382	0.124	AKT3,BET1L,CLDN12,CSTF1,CTNNB1,F2RL2,HSF1,NAPG,NECTIN2,NSF,PPP2R3B,PTEN,RELA,STX1B,TJP1,YKT6
Cardiac Hypertrophy Signaling (Enhanced)	0.377	0.12	ACVR1,ACVR1B,AKT3,CAMK4,CTNNB1,DIAPH3,DVL1,DVL2,EP300,FGF1,FZD6,GNB2,GNB4,GNG12,HDAC1,IFNAR1,IL17RE,ITGAV,ITGB1,ITPR1,MAP2K2,MAP3K11,MAP3K2,MAPK8,MAPKAPK2,MRAS,NAPEPLD,NRAS,PKN1,PLCB1,PRKD1,PTEN,RAF1,RAP2A,RELA,ROCK1,RRAS,TDP2,WNT10B,WNT5A
Cyclins and Cell Cycle Regulation	0.371	0.127	CCNA2,CDK6,CDKN2A,CDKN2C,E2F4,HDAC1,PPP2R3B,RAF1,SKP1,WEE1
NRF2-mediated Oxidative Stress Response	0.369	0.122	AKR1A1,AOX1,BACH1,DNAJB12,DNAJB14,DNAJC10,EP300,GSTP1,MAP2K2,MAPK8,MRAS,NRAS,PRKD1,RAF1,RAP2A,RRAS,SOD3,SQSTM1,TXN,UBB
Pancreatic Adenocarcinoma Signaling	0.369	0.124	AKT3,BAD,BRCA2,CDKN2A,E2F4,HDAC1,MAP2K2,MAPK8,MDM2,NAPEPLD,PLD3,RAF1,RELA,VEGFB
JAK/STAT Signaling	0.364	0.127	AKT3,MAP2K2,MRAS,NRAS,PIAS3,RAF1,RAP2A,RELA,RRAS
B Cell Receptor Signaling	0.363	0.122	AKT3,BAD,BCL10,CAMK4,CREB1,CREB3L1,MAP2K2,MAP3K11,MAP3K2,MAPK8,MRAS,NRAS,PTEN,RAF1,RAP2A,RELA,RRAS
T Cell Exhaustion Signaling Pathway	0.362	0.124	ACVR1,ACVR1B,AKT3,FOXP1,HLA-A,IFNAR1,IRF9,MAPK8,MRAS,NRAS,PPP2R3B,RAP2A,RRAS
FcγRIIB Signaling in B Lymphocytes	0.358	0.13	ITPR1,MAPK8,MRAS,NRAS,RAP2A,RRAS
CCR5 Signaling in Macrophages	0.356	0.127	CAMK4,GNB2,GNB4,GNG12,ITPR1,MAPK8,MRAS,PRKD1
PKCθ Signaling in T Lymphocytes	0.355	0.124	BCL10,HLA-A,ITPR1,MAP3K11,MAP3K2,MAPK8,MRAS,NRAS,RAC3,RAP2A,RELA,RRAS
ERBB Signaling	0.347	0.125	MAP2K2,MAPK8,MRAS,NRAS,PAK4,PRKD1,RAF1,RAP2A,RRAS
Role of NFAT in Cardiac Hypertrophy	0.341	0.12	AKAP5,AKT3,CAMK1D,CAMK4,EP300,GNB2,GNB4,GNG12,HDAC1,ITPR1,MAP2K2,MAPK8,MRAS,NRAS,PLCB1,PRKD1,RAF1,RAP2A,RRAS
Superpathway of Serine and Glycine Biosynthesis I	0.34	0.2	UBAC2
Superoxide Radicals Degradation	0.34	0.2	SOD3
Glycoaminoglycan-protein Linkage Region Biosynthesis	0.34	0.2	XYLT2
Galactose Degradation I (Leloir Pathway)	0.34	0.2	GALK1
Folate Polyglutamylation	0.34	0.2	FPGS
AMPK Signaling	0.338	0.12	AKT3,ARID2,CAMKK2,CCNA2,CREB1,CREB3L1,CRTC2,EP300,GNB2,GNB4,GNG12,INSR,LIPE,MRAS,ORAI2,PFKL,PHF10,PPP2R3B,PRKAA2,SMARCB1,SMARCD1,STK11
Circadian Rhythm Signaling	0.336	0.12	CREB1,CREB3L1,GNB2,GNB4,GNG12,GRIN2C,HSF1,ITPR1,MAP2K2,MDM2,MRAS,NRAS,PLCB1,PRKAA2,PRKD1,RACK1,RAF1,RAP2A,RRAS,SLC39A7
IL-17 Signaling	0.333	0.122	AKT3,IL17RE,MAPK8,MRAS,NRAS,RAP2A,RELA,RRAS,TAB2,TRAF5,VEGFB
Adrenomedullin signaling pathway	0.332	0.12	AKT3,BAD,CAMK4,ITPR1,MAP2K2,MAPK8,MRAS,NRAS,PLCB1,RAF1,RAP2A,RELA,RRAS,SLC39A7,TFAP2A,TFAP2C
Calcium Signaling	0.33	0.121	AKAP5,CAMK1D,CAMK4,CAMKK2,CREB1,CREB3L1,EP300,GRIN2C,HDAC1,ITPR1,MICU1,RAP2A,TPM2,TRPC4
Sertoli Cell-Sertoli Cell Junction Signaling	0.327	0.12	AKT3,CLDN12,CTNNB1,ITGAV,ITGB1,MAP2K2,MAP3K11,MAP3K2,MAPK8,MRAS,NECTIN2,NRAS,PTEN,RAF1,RAP2A,RRAS,TJP1
Xenobiotic Metabolism PXR Signaling Pathway	0.327	0.121	CES4A,CHST12,EP300,GSTP1,NCOR1,PPP1R10,PPP1R3C,PPP1R3D,PRKD1,SCAND1,SNW1,SRA1
Cysteine Biosynthesis III (mammalia)	0.325	0.136	ALKBH8,MAT2B,THUMPD3
Protein Ubiquitination Pathway	0.323	0.118	B2M,CBL,DNAJB12,DNAJB14,DNAJC10,HLA-A,HSPA1A/HSPA1B,MDM2,PSMB7,PSMD13,PSMD5,RPS27A,SKP1,UBB,UBC,UBE2D1,UBE2R2,UBE2S,UBE2W,UBE3A,UBE4A,UBR1,USP22,USP24,USP39,USP45,USP47,USP51,XIAP
ATM Signaling	0.319	0.121	BRAT1,CBX5,CHEK2,CREB1,CREB3L1,MAPK8,MDM2,MDM4,PPP2R3B,SMC3,ZNF420
Sphingosine-1-phosphate Signaling	0.319	0.121	AKT3,ASAH1,CASP4,CASP6,CASP7,CASP8,PLCB1,RAC3,RHOBTB2,RHOT1,RHOT2
CNTF Signaling	0.318	0.125	MAP2K2,MRAS,NRAS,RAF1,RAP2A,RRAS
Assembly of RNA Polymerase II Complex	0.318	0.125	GTF2A1,GTF2A2,GTF2F1,POLR2K,TAF11,TAF9B
Purine Nucleotides Degradation II (Aerobic)	0.309	0.143	NT5C3A,XDH
Colanic Acid Building Blocks Biosynthesis	0.309	0.143	GALK1,PMM1
Complement System	0.309	0.143	C5,CD55
PFKFB4 Signaling Pathway	0.306	0.125	CREB1,CREB3L1,MAP2K2,TKT,XDH
Renin-Angiotensin Signaling	0.305	0.12	ITPR1,MAP2K2,MAPK8,MRAS,NRAS,PAK4,PRKD1,RAF1,RAP2A,RELA,RRAS
Cell Cycle: G1/S Checkpoint Regulation	0.305	0.121	CDK6,CDKN2A,CDKN2C,E2F4,HDAC1,MDM2,RPL11,SKP1
TEC Kinase Signaling	0.302	0.118	GNB2,GNB4,GNG12,ITGAV,ITGB1,MAPK8,MRAS,PAK4,PRKD1,RAC3,RELA,RHOBTB2,RHOT1,RHOT2,TNFRSF10B
CDX Gastrointestinal Cancer Signaling Pathway	0.301	0.119	AKT3,BMP1,CTNNB1,FZD6,MAP2K2,NOX4,PTEN,RAC3,RELA,TCF4,WNT10B,WNT5A
Melanocyte Development and Pigmentation Signaling	0.3	0.12	CREB1,CREB3L1,EP300,MAP2K2,MRAS,NRAS,RAF1,RAP2A,RRAS
Prolactin Signaling	0.3	0.12	EP300,MAP2K2,MRAS,NRAS,PRKD1,RAF1,RAP2A,RRAS,SP1
Inhibition of ARE-Mediated mRNA Degradation Pathway	0.298	0.118	AKT3,CNOT3,CNOT7,CNOT9,DCP1A,EDC4,MAPKAPK2,PPP2R3B,PSMB7,PSMD13,PSMD5,XRN1,YWHAB,YWHAE,YWHAH,YWHAZ
Death Receptor Signaling	0.296	0.119	CASP6,CASP7,CASP8,CFLAR,DAXX,MAPK8,RELA,ROCK1,TNFRSF10B,XIAP
Ephrin A Signaling	0.291	0.125	EFNA4,EFNA5,EPHA5,ROCK1
Amyotrophic Lateral Sclerosis Signaling	0.29	0.119	AKT3,CAPN1,CAPNS1,CASP7,GRIN2C,SSR4,VEGFB,XIAP
Regulation Of The Epithelial Mesenchymal Transition By Growth Factors Pathway	0.288	0.117	AKT3,CDH2,FGF1,FRS2,HSF1,MAP2K2,MAPK8,MRAS,NRAS,RAF1,RAP2A,RELA,RRAS,VIM,WWTR1,YAP1
BAG2 Signaling Pathway	0.286	0.118	HSPA1A/HSPA1B,MAPKAPK2,MDM2,PSMB7,PSMD13,PSMD5,RELA,SP1,UBE2D1
NAD biosynthesis II (from tryptophan)	0.284	0.167	NMNAT1
Chondroitin and Dermatan Biosynthesis	0.284	0.167	CHPF
Thioredoxin Pathway	0.284	0.167	TXN
Inositol Pyrophosphates Biosynthesis	0.284	0.167	IPMK
Ceramide Degradation	0.284	0.167	ASAH1
GDP-mannose Biosynthesis	0.284	0.167	PMM1
VDR/RXR Activation	0.282	0.12	EP300,LRP5,NCOR1,PRKD1,SP1,VDR
Telomere Extension by Telomerase	0.277	0.133	POT1,TINF2
SPINK1 Pancreatic Cancer Pathway	0.277	0.133	CPD,CTSA
Role of p14/p19ARF in Tumor Suppression	0.273	0.125	CDKN2A,MDM2,UBTF
Role of OCT4 in Mammalian Embryonic Stem Cell Pluripotency	0.27	0.121	CASP6,PHC3,REST,TASOR
Granulocyte Adhesion and Diapedesis	0.266	0.118	C5,CLDN12,ITGB1,MMP11,MMP17,RDX
EGF Signaling	0.266	0.118	AKT3,CSNK2B,ITPR1,MAPK8,RAF1,RASA1
PD-1, PD-L1 cancer immunotherapy pathway	0.264	0.117	AKT3,B2M,CSNK2B,HLA-A,IFNGR1,PTEN,YAP1
Role of BRCA1 in DNA Damage Response	0.26	0.115	ARID2,BARD1,BRCA2,CHEK2,E2F4,FANCL,PHF10,SMARCB1,SMARCD1
CD28 Signaling in T Helper Cells	0.26	0.115	AKT3,ARPC1A,BCL10,CAMK4,HLA-A,ITPR1,MAP2K2,MAPK8,RELA
Communication between Innate and Adaptive Immune Cells	0.251	0.12	B2M,HLA-A,TNFRSF13C
Glycolysis I	0.248	0.125	ENO2,PFKL
B Cell Development	0.24	0.143	HLA-A
Prostanoid Biosynthesis	0.24	0.143	PTGS1
Androgen Biosynthesis	0.24	0.143	SRD5A3
Glycine Betaine Degradation	0.24	0.143	SDSL
Chondroitin Sulfate Biosynthesis	0.23	0.115	CHPF,CHST12,XYLT2
Inhibition of Matrix Metalloproteases	0.23	0.115	ADAM12,MMP11,MMP17
Apelin Cardiac Fibroblast Signaling Pathway	0.223	0.118	AKT3,PRKAA2
Airway Inflammation in Asthma	0.205	0.125	IFNGR1
Sphingosine and Sphingosine-1-phosphate Metabolism	0.205	0.125	ASAH1
Dilated Cardiomyopathy Signaling Pathway	0	0.0706	AKT3,BAD,CAMK1D,CAMK4,ITPR1,KDM1A
NAD Signaling Pathway	0	0.0833	AKT3,ERN1,H2BC12,H2BC5,NMNAT1,POLR2K,PRKAA2,SIRT7,SLC7A5
Pyroptosis Signaling Pathway	0	0.0727	CASP4,CASP8,GBP1,TXNIP
IL-13 Signaling Pathway	0	0.0526	AKT3,CTNNB1,ROCK1
SNARE Signaling Pathway	0	0.105	BET1L,CAMK4,NAPG,NSF,RIMS1,STX1B,STXBP4,YKT6
Macrophage Classical Activation Signaling Pathway	0	0.0568	IFNAR1,IFNGR1,IRF9,MT-CO1,RELA
MicroRNA Biogenesis Signaling Pathway	0	0.0897	AKT3,DGCR8,MRAS,MTCL1,NRAS,POLR2K,POM121/POM121C,RAP2A,RRAS,SMAD5,SMAD9,XRN1,YAP1,ZC3H12A
Multiple Sclerosis Signaling Pathway	0	0.0721	C5,CAPN1,CAPNS1,CASP8,GRIN2C,HLA-A,IFNGR1,MGAT1
Pathogen Induced Cytokine Storm Signaling Pathway	0	0.105	C5,CASP7,CASP8,COL15A1,COL16A1,COL18A1,COL6A1,COL6A2,IFNAR1,IFNGR1,IRF9,LYST,MAPK8,TNFRSF10B,VEGFB
Role Of Chondrocytes In Rheumatoid Arthritis Signaling Pathway	0	0.086	CAMKK2,CASP8,CFLAR,ITGB1,MMP11,MMP17,PRKAA2,VEGFB
IL-10 Signaling	0	0.0625	MAPK8,RELA,SP1
Leukocyte Extravasation Signaling	0	0.1	ARHGAP5,CLDN12,CTNNB1,CYBA,ITGB1,MAP2K2,MAPK8,MMP11,MMP17,PRKD1,RDX,ROCK1
Synaptic Long Term Depression	0	0.104	ITPR1,MAP2K2,MRAS,NRAS,PLCB1,PPP2R3B,PRKD1,RAF1,RAP2A,RRAS,SLC39A7
PPARα/RXRα Activation	0	0.112	ABCA1,ACVR1,ACVR1B,EP300,INSR,MAP2K2,MAPK8,MRAS,NCOR1,NRAS,PLCB1,PRKAA2,RAF1,RAP2A,RELA,RRAS
Aryl Hydrocarbon Receptor Signaling	0	0.102	AHR,CCNA2,CDK6,CDKN2A,CHEK2,EP300,GSTP1,MAPK8,MDM2,RELA,SP1
LPS/IL-1 Mediated Inhibition of RXR Function	0	0.0614	ABCA1,APOE,CHST12,ECSIT,GSTP1,MAPK8,SOD3
Coagulation System	0	0.0667	PLAT
Acute Phase Response Signaling	0	0.103	AKT3,C5,ECSIT,MAP2K2,MAPK8,MRAS,NRAS,RAF1,RAP2A,RELA,RRAS,TCF4
Hepatic Cholestasis	0	0.0606	INSR,MAP4K2,MAPK8,PRKD1,RELA,TIRAP
LXR/RXR Activation	0	0.0962	ABCA1,APOD,APOE,NCOR1,RELA
Hepatic Fibrosis / Hepatic Stellate Cell Activation	0	0.0847	COL15A1,COL16A1,COL18A1,COL6A1,COL6A2,FGF1,IFNAR1,IFNGR1,RELA,VEGFB
FXR/RXR Activation	0	0.0909	AKT3,APOD,APOE,MAPK8
PXR/RXR Activation	0	0.0938	AKT3,INSR,RELA
TR/RXR Activation	0	0.103	AKT3,CAMK4,EP300,MDM2,NCOR1,UCP2
Activation of IRF by Cytosolic Pattern Recognition Receptors	0	0.109	IFNAR1,IRF9,MAPK8,RELA,SIKE1
Fcγ Receptor-mediated Phagocytosis in Macrophages and Monocytes	0	0.11	AKT3,ARPC1A,CBL,NAPEPLD,PLD3,PRKD1,PTEN,RAC3
Role of RIG1-like Receptors in Antiviral Innate Immunity	0	0.0968	CASP8,EP300,RELA
Role of Pattern Recognition Receptors in Recognition of Bacteria and Viruses	0	0.08	C5,CREB1,EIF2AK2,MAPK8,PRKD1,RELA
Role of PKR in Interferon Induction and Antiviral Response	0	0.108	CASP8,EIF2AK2,HSPA1A/HSPA1B,IFNAR1,IFNGR1,IRF9,MAPK8,RELA,SP1,TAB2,TIRAP
TREM1 Signaling	0	0.075	AKT3,ITGB1,RELA
MIF Regulation of Innate Immunity	0	0.103	JMJD7-PLA2G4B,MAPK8,RELA
IL-22 Signaling	0	0.0909	AKT3,MAPK8
CD40 Signaling	0	0.103	MAP2K2,MAPK8,MAPKAPK2,PTGS1,RELA,TRAF5
Lymphotoxin β Receptor Signaling	0	0.0889	AKT3,EP300,RELA,TRAF5
Airway Pathology in Chronic Obstructive Pulmonary Disease	0	0.069	APOD,FGF1
4-1BB Signaling in T Lymphocytes	0	0.0909	MAP2K2,MAPK8,RELA
Induction of Apoptosis by HIV1	0	0.105	CASP8,DAXX,MAPK8,RELA,SLC25A6,XIAP
B Cell Activating Factor Signaling	0	0.1	MAPK8,RELA,TNFRSF13C,TRAF5
IL-15 Production	0	0.0759	CLK2,EPHA5,INSR,MAP3K11,RELA,TWF1
T Helper Cell Differentiation	0	0.08	HLA-A,IFNGR1
IL-9 Signaling	0	0.0385	RELA
Dendritic Cell Maturation	0	0.0971	AKT3,B2M,COL18A1,CREB1,CREB3L1,HLA-A,IFNAR1,MAPK8,PLCB1,RELA
Mechanisms of Viral Exit from Host Cells	0	0.114	CHMP2B,CHMP4B,CHMP6,PRKD1
Reelin Signaling in Neurons	0	0.113	AKT3,APOE,APP,ARHGEF39,ARPC1A,CDH2,GRIN2C,ITGB1,MAP2K2,MAP3K11,MAPK8,NDEL1
Melatonin Signaling	0	0.0962	CAMK4,MAP2K2,PLCB1,PRKD1,RAF1
Cellular Effects of Sildenafil (Viagra)	0	0.0667	CAMK4,ITPR1,MPRIP,MYL12B,PLCB1
Neuropathic Pain Signaling In Dorsal Horn Neurons	0	0.109	CAMK1D,CAMK4,CREB1,GRIN2C,ITPR1,PLCB1,PRKD1
Relaxin Signaling	0	0.0962	AKT3,CREB1,GNB2,GNB4,GNG12,MRAS,NAPEPLD,RELA,SLC39A7,TDP2
Docosahexaenoic Acid (DHA) Signaling	0	0.1	AKT3,APP,BAD
ICOS-ICOSL Signaling in T Helper Cells	0	0.108	AKT3,BAD,CAMK4,HLA-A,ITPR1,PTEN,RELA
Lipid Antigen Presentation by CD1	0	0.0769	B2M
Cell Cycle Regulation by BTG Family Proteins	0	0.0833	CNOT7,E2F4,PPP2R3B
Corticotropin Releasing Hormone Signaling	0	0.0889	CAMK4,CREB1,CREB3L1,ITPR1,MAP2K2,PRKD1,RAF1,SLC39A7
Role of CHK Proteins in Cell Cycle Checkpoint Control	0	0.0526	CHEK2,E2F4,PPP2R3B
RAN Signaling	0	0.0625	RANGAP1
Aldosterone Signaling in Epithelial Cells	0	0.0763	DNAJB12,DNAJB14,DNAJC10,HSPA1A/HSPA1B,ITPR1,MAP2K2,PIP4K2C,PLCB1,PRKD1,RAF1
Growth Hormone Signaling	0	0.0196	PRKD1
Type I Diabetes Mellitus Signaling	0	0.0685	CASP8,HLA-A,IFNGR1,MAPK8,RELA
Small Cell Lung Cancer Signaling	0	0.105	AKT3,CDK6,CKS1B,E2F4,HDAC1,PIAS3,PTEN,RELA,TRAF5
Primary Immunodeficiency Signaling	0	0.0667	TNFRSF13C
Autoimmune Thyroid Disease Signaling	0	0.0909	HLA-A
Graft-versus-Host Disease Signaling	0	0.0909	HLA-A
Type II Diabetes Mellitus Signaling	0	0.07	AKT3,INSR,ITPR1,MAPK8,PRKAA2,PRKD1,RELA
Cleavage and Polyadenylation of Pre-mRNA	0	0.0833	CSTF1
MYC Mediated Apoptosis Signaling	0	0.093	CASP8,CDKN2A,CFLAR,MDM2
Crosstalk between Dendritic Cells and Natural Killer Cells	0	0.105	HLA-A,MICB,NECTIN2,RELA
ILK Signaling	0	0.112	AKT3,CREB1,CREB3L1,CTNNB1,ITGB1,MAPK8,PPP2R3B,PTEN,RAC3,RELA,RHOBTB2,RHOT1,RHOT2,RICTOR,TMSB10/TMSB4X,VEGFB,VIM
April Mediated Signaling	0	0.0769	MAPK8,RELA,TRAF5
Retinoic acid Mediated Apoptosis Signaling	0	0.111	CASP8,CFLAR,IFNAR1,TNFRSF10B
RHOA Signaling	0	0.101	ARHGAP5,ARPC1A,BAIAP2,MPRIP,MYL12B,PIP4K2C,PKN1,PLXNA1,RDX,ROCK1
Altered T Cell and B Cell Signaling in Rheumatoid Arthritis	0	0.107	HLA-A,RELA,TNFRSF13C
Atherosclerosis Signaling	0	0.0755	APOD,APOE,COL18A1,RELA
Leptin Signaling in Obesity	0	0.0588	AKT3,MAP2K2,PLCB1
Granzyme B Signaling	0	0.0714	CASP8
IL-1 Signaling	0	0.114	ECSIT,GNB2,GNB4,GNG12,MAPK8,MRAS,RELA,TAB2,TOLLIP
TNFR2 Signaling	0	0.107	MAPK8,RELA,XIAP
[truncated: 118 more rows]

## Sheet: Results gain rhythmicity in old
Filtering criterion: weighted BIC > 0.75 for ‘Rhythmic in Old but not Young’ model
[truncated: 482 more rows]

[truncated: 1 more sheets: Results rhythmic in both]
