# Supplementary material for: Evidence for a role of human blood-borne factors in mediating age-associated changes in molecular circadian rhythms
Source: eLife. 2024 Nov 1;12:RP88322. doi: 10.7554/eLife.88322 (PMC11530234; doi:10.7554/eLife.88322)
Supplement: Figure 3—source data 1. [file elife-88322-fig3-data1.xlsx]

## Sheet: Input Genes
All genes with amplitude decreased (q < 0.05)	All genes with amplitude increased (q < 0.05)	Genes rhythmic (weighted BIC > 0.75) in young and old with mesor decreased (q < 0.05)	Genes rhythmic (weighted BIC > 0.75) in young and old with mesor increased (q < 0.05)	Genes rhythmic (weighted BIC > 0.75) in young and old with phase advanced (q < 0.05)	Genes rhythmic (weighted BIC > 0.75) in young and old with phase delayed (q < 0.05)	Genes rhythmic in young and old (weighted BIC > 0.75)	Genes rhythmic in young but not in old (weighted BIC > 0.75)	Genes rhythmic in old but not in young (weighted BIC > 0.75)	Rhythmicity different in young vs. old (q < 0.05)
ENSG00000014123	ENSG00000065978	ENSG00000004660	ENSG00000003756	ENSG00000060138	ENSG00000004534	ENSG00000003436	ENSG00000002330	ENSG00000001497	ENSG00000006715
ENSG00000026025	ENSG00000131188	ENSG00000005189	ENSG00000008710	ENSG00000084623	ENSG00000005189	ENSG00000003756	ENSG00000002919	ENSG00000003989	ENSG00000007520
ENSG00000084093		ENSG00000006015	ENSG00000011021	ENSG00000100813	ENSG00000049246	ENSG00000004534	ENSG00000003056	ENSG00000004139	ENSG00000008086
ENSG00000106665		ENSG00000007968	ENSG00000012660	ENSG00000104324	ENSG00000054598	ENSG00000004660	ENSG00000003402	ENSG00000004142	ENSG00000008952
ENSG00000111530		ENSG00000010292	ENSG00000031698	ENSG00000135486	ENSG00000060982	ENSG00000005189	ENSG00000004487	ENSG00000004779	ENSG00000009780
ENSG00000112851		ENSG00000011198	ENSG00000033327	ENSG00000136603	ENSG00000082482	ENSG00000005469	ENSG00000004700	ENSG00000005020	ENSG00000010292
ENSG00000113387		ENSG00000011304	ENSG00000047644	ENSG00000143376	ENSG00000090971	ENSG00000005810	ENSG00000004766	ENSG00000005339	ENSG00000014123
ENSG00000118596		ENSG00000012048	ENSG00000049860	ENSG00000152518	ENSG00000099624	ENSG00000006015	ENSG00000004975	ENSG00000006459	ENSG00000026025
ENSG00000131446		ENSG00000013573	ENSG00000054598	ENSG00000160813	ENSG00000101745	ENSG00000007968	ENSG00000005238	ENSG00000006638	ENSG00000034053
ENSG00000133597		ENSG00000017797	ENSG00000058668	ENSG00000167460	ENSG00000103260	ENSG00000008294	ENSG00000005436	ENSG00000007520	ENSG00000048649
ENSG00000134222		ENSG00000031691	ENSG00000064042	ENSG00000171552	ENSG00000116096	ENSG00000008311	ENSG00000005700	ENSG00000008018	ENSG00000049246
ENSG00000138080		ENSG00000035928	ENSG00000070961	ENSG00000176788	ENSG00000119048	ENSG00000008394	ENSG00000006118	ENSG00000008086	ENSG00000051128
ENSG00000152784		ENSG00000037757	ENSG00000072042	ENSG00000177225	ENSG00000121671	ENSG00000008405	ENSG00000006634	ENSG00000008130	ENSG00000051523
ENSG00000156411		ENSG00000039319	ENSG00000075391	ENSG00000184743	ENSG00000126368	ENSG00000008710	ENSG00000006712	ENSG00000008517	ENSG00000051620
ENSG00000157637		ENSG00000049130	ENSG00000077157	ENSG00000184897	ENSG00000130764	ENSG00000010292	ENSG00000006715	ENSG00000009335	ENSG00000055950
ENSG00000160298		ENSG00000050438	ENSG00000079277	ENSG00000185900	ENSG00000141933	ENSG00000011021	ENSG00000008128	ENSG00000009724	ENSG00000060138
ENSG00000160741		ENSG00000052749	ENSG00000079459	ENSG00000204590	ENSG00000141985	ENSG00000011198	ENSG00000008853	ENSG00000011260	ENSG00000060237
ENSG00000162378		ENSG00000055130	ENSG00000083857	ENSG00000261888	ENSG00000161203	ENSG00000011275	ENSG00000008869	ENSG00000011332	ENSG00000062485
ENSG00000162889		ENSG00000056050	ENSG00000087086	ENSG00000270647	ENSG00000162636	ENSG00000011295	ENSG00000008952	ENSG00000012171	ENSG00000063245
ENSG00000164104		ENSG00000058729	ENSG00000091490	ENSG00000289047	ENSG00000166833	ENSG00000011304	ENSG00000008988	ENSG00000012822	ENSG00000065978
ENSG00000166801		ENSG00000059588	ENSG00000099194		ENSG00000167074	ENSG00000011451	ENSG00000009780	ENSG00000013306	ENSG00000070018
ENSG00000169967		ENSG00000062822	ENSG00000101745		ENSG00000169504	ENSG00000012048	ENSG00000010818	ENSG00000023287	ENSG00000075292
ENSG00000170734		ENSG00000064607	ENSG00000102580		ENSG00000173153	ENSG00000012174	ENSG00000011028	ENSG00000023734	ENSG00000075303
ENSG00000196628		ENSG00000065183	ENSG00000103111		ENSG00000174276	ENSG00000012660	ENSG00000011114	ENSG00000033050	ENSG00000075624
ENSG00000198695		ENSG00000065328	ENSG00000103502		ENSG00000174738	ENSG00000013573	ENSG00000011243	ENSG00000037637	ENSG00000078098
ENSG00000198712		ENSG00000065923	ENSG00000103888		ENSG00000175455	ENSG00000017797	ENSG00000012983	ENSG00000037897	ENSG00000078808
ENSG00000198727		ENSG00000066279	ENSG00000104324		ENSG00000185070	ENSG00000020129	ENSG00000013810	ENSG00000043514	ENSG00000080845
ENSG00000198763		ENSG00000067248	ENSG00000105443		ENSG00000185222	ENSG00000021826	ENSG00000014123	ENSG00000050426	ENSG00000083535
ENSG00000198786		ENSG00000067533	ENSG00000105877		ENSG00000197982	ENSG00000026508	ENSG00000014216	ENSG00000051108	ENSG00000083845
ENSG00000198804		ENSG00000068878	ENSG00000107104		ENSG00000259956	ENSG00000031691	ENSG00000015171	ENSG00000051620	ENSG00000084072
ENSG00000198886		ENSG00000069869	ENSG00000107263		ENSG00000264112	ENSG00000031698	ENSG00000015532	ENSG00000053371	ENSG00000084093
ENSG00000198899		ENSG00000069998	ENSG00000107957		ENSG00000270170	ENSG00000032444	ENSG00000018408	ENSG00000053372	ENSG00000084623
ENSG00000198918		ENSG00000070785	ENSG00000108828		ENSG00000274523	ENSG00000033327	ENSG00000018510	ENSG00000053747	ENSG00000084636
ENSG00000198938		ENSG00000070950	ENSG00000110619		ENSG00000289234	ENSG00000034152	ENSG00000021645	ENSG00000054277	ENSG00000085365
ENSG00000205423		ENSG00000072415	ENSG00000110693			ENSG00000035681	ENSG00000022840	ENSG00000055044	ENSG00000087152
ENSG00000213903		ENSG00000073111	ENSG00000110756			ENSG00000035928	ENSG00000023516	ENSG00000055950	ENSG00000088038
ENSG00000228253		ENSG00000074266	ENSG00000110921			ENSG00000037757	ENSG00000023572	ENSG00000060718	ENSG00000088766
ENSG00000247556		ENSG00000075131	ENSG00000111252			ENSG00000039319	ENSG00000024422	ENSG00000061918	ENSG00000089248
ENSG00000280435		ENSG00000075618	ENSG00000111276			ENSG00000040487	ENSG00000025293	ENSG00000064115	ENSG00000090971
		ENSG00000076003	ENSG00000112210			ENSG00000043143	ENSG00000026025	ENSG00000064763	ENSG00000091732
		ENSG00000076248	ENSG00000112972			ENSG00000044115	ENSG00000027697	ENSG00000065978	ENSG00000092439
		ENSG00000077312	ENSG00000114439			ENSG00000044459	ENSG00000030419	ENSG00000066379	ENSG00000099246
		ENSG00000077514	ENSG00000115295			ENSG00000044574	ENSG00000034053	ENSG00000066697	ENSG00000099364
		ENSG00000079156	ENSG00000116106			ENSG00000047188	ENSG00000034510	ENSG00000067208	ENSG00000099385
		ENSG00000080608	ENSG00000116133			ENSG00000047644	ENSG00000034533	ENSG00000068137	ENSG00000099624
		ENSG00000080709	ENSG00000118689			ENSG00000047849	ENSG00000035499	ENSG00000068654	ENSG00000100030
		ENSG00000080839	ENSG00000119048			ENSG00000049130	ENSG00000035664	ENSG00000069275	ENSG00000100300
		ENSG00000084070	ENSG00000120337			ENSG00000049246	ENSG00000038274	ENSG00000069493	ENSG00000100354
		ENSG00000085840	ENSG00000120437			ENSG00000049860	ENSG00000038358	ENSG00000069849	ENSG00000101084
		ENSG00000085999	ENSG00000121039			ENSG00000050344	ENSG00000038532	ENSG00000070010	ENSG00000101104
		ENSG00000087088	ENSG00000121067			ENSG00000050405	ENSG00000039123	ENSG00000071794	ENSG00000101745
		ENSG00000087152	ENSG00000122862			ENSG00000050438	ENSG00000040341	ENSG00000071994	ENSG00000102225
		ENSG00000087586	ENSG00000124299			ENSG00000052749	ENSG00000040633	ENSG00000074657	ENSG00000102898
		ENSG00000089050	ENSG00000124942			ENSG00000054598	ENSG00000043093	ENSG00000074800	ENSG00000102974
		ENSG00000089280	ENSG00000125730			ENSG00000054654	ENSG00000044446	ENSG00000076043	ENSG00000103187
		ENSG00000089685	ENSG00000125744			ENSG00000055130	ENSG00000047932	ENSG00000077097	ENSG00000103260
		ENSG00000089737	ENSG00000127481			ENSG00000056050	ENSG00000048544	ENSG00000077420	ENSG00000103266
		ENSG00000091127	ENSG00000128272			ENSG00000058668	ENSG00000049192	ENSG00000079950	ENSG00000104299
		ENSG00000092199	ENSG00000130164			ENSG00000058729	ENSG00000049883	ENSG00000080819	ENSG00000104763
		ENSG00000092470	ENSG00000130175			ENSG00000059588	ENSG00000050165	ENSG00000082516	ENSG00000104960
		ENSG00000092853	ENSG00000130270			ENSG00000060138	ENSG00000051128	ENSG00000083750	ENSG00000104964
		ENSG00000093009	ENSG00000130313			ENSG00000060982	ENSG00000051523	ENSG00000085377	ENSG00000105443
		ENSG00000094804	ENSG00000130508			ENSG00000061337	ENSG00000052723	ENSG00000086189	ENSG00000105472
		ENSG00000095002	ENSG00000130529			ENSG00000062822	ENSG00000052795	ENSG00000087191	ENSG00000105701
		ENSG00000096746	ENSG00000130766			ENSG00000064042	ENSG00000054392	ENSG00000087263	ENSG00000106052
		ENSG00000099624	ENSG00000130818			ENSG00000064607	ENSG00000054983	ENSG00000087269	ENSG00000106665
		ENSG00000099800	ENSG00000132196			ENSG00000065183	ENSG00000055070	ENSG00000087365	ENSG00000106780
		ENSG00000099810	ENSG00000132405			ENSG00000065328	ENSG00000055208	ENSG00000088766	ENSG00000108561
		ENSG00000099821	ENSG00000132471			ENSG00000065882	ENSG00000055332	ENSG00000089053	ENSG00000108582
		ENSG00000100297	ENSG00000133606			ENSG00000065923	ENSG00000056277	ENSG00000089060	ENSG00000108784
		ENSG00000100413	ENSG00000133794			ENSG00000065970	ENSG00000056586	ENSG00000089159	ENSG00000108819
		ENSG00000100479	ENSG00000133812			ENSG00000066084	ENSG00000057663	ENSG00000089289	ENSG00000108953
		ENSG00000100526	ENSG00000134318			ENSG00000066279	ENSG00000058091	ENSG00000089327	ENSG00000109790
		ENSG00000101003	ENSG00000134824			ENSG00000066583	ENSG00000059122	ENSG00000090861	ENSG00000110367
		ENSG00000101224	ENSG00000135596			ENSG00000067082	ENSG00000060237	ENSG00000090989	ENSG00000110700
		ENSG00000101407	ENSG00000137269			ENSG00000067248	ENSG00000061676	ENSG00000091986	ENSG00000110811
		ENSG00000101412	ENSG00000138119			ENSG00000067533	ENSG00000062485	ENSG00000092964	ENSG00000110931
		ENSG00000101773	ENSG00000139793			ENSG00000067798	ENSG00000063177	ENSG00000094631	ENSG00000111530
		ENSG00000101911	ENSG00000140497			ENSG00000068323	ENSG00000063660	ENSG00000096384	ENSG00000111786
		ENSG00000103415	ENSG00000140941			ENSG00000068878	ENSG00000064012	ENSG00000099337	ENSG00000112200
		ENSG00000104320	ENSG00000141401			ENSG00000069869	ENSG00000064419	ENSG00000099341	ENSG00000112851
		ENSG00000104524	ENSG00000142188			ENSG00000069974	ENSG00000064601	ENSG00000099625	ENSG00000113318
		ENSG00000104738	ENSG00000143106			ENSG00000069998	ENSG00000064961	ENSG00000099783	ENSG00000113387
		ENSG00000104824	ENSG00000143127			ENSG00000070081	ENSG00000064995	ENSG00000099875	ENSG00000114125
		ENSG00000104852	ENSG00000143624			ENSG00000070087	ENSG00000065054	ENSG00000099901	ENSG00000114978
		ENSG00000105355	ENSG00000144711			ENSG00000070770	ENSG00000065243	ENSG00000099942	ENSG00000115756
		ENSG00000105722	ENSG00000145390			ENSG00000070785	ENSG00000065491	ENSG00000099949	ENSG00000116096
		ENSG00000105971	ENSG00000147383			ENSG00000070950	ENSG00000065613	ENSG00000099995	ENSG00000116251
		ENSG00000106392	ENSG00000150403			ENSG00000070961	ENSG00000066117	ENSG00000100219	ENSG00000116871
		ENSG00000106459	ENSG00000150457			ENSG00000071054	ENSG00000066136	ENSG00000100234	ENSG00000117118
		ENSG00000106537	ENSG00000152558			ENSG00000071894	ENSG00000067141	ENSG00000100280	ENSG00000118046
		ENSG00000107581	ENSG00000152818			ENSG00000072042	ENSG00000067365	ENSG00000100335	ENSG00000118596
		ENSG00000107815	ENSG00000153786			ENSG00000072133	ENSG00000067646	ENSG00000100376	ENSG00000119004
		ENSG00000108021	ENSG00000154144			ENSG00000072415	ENSG00000067900	ENSG00000100462	ENSG00000119042
		ENSG00000109436	ENSG00000155313			ENSG00000072864	ENSG00000068120	ENSG00000100632	ENSG00000120137
		ENSG00000109536	ENSG00000160285			ENSG00000073111	ENSG00000068796	ENSG00000100764	ENSG00000123179
		ENSG00000110274	ENSG00000160752			ENSG00000073331	ENSG00000070018	ENSG00000100804	ENSG00000123684
		ENSG00000111358	ENSG00000162614			ENSG00000073605	ENSG00000070269	ENSG00000100823	ENSG00000123989
		ENSG00000111605	ENSG00000163083			ENSG00000073712	ENSG00000070413	ENSG00000101084	ENSG00000124172
		ENSG00000111845	ENSG00000163453			ENSG00000073792	ENSG00000070495	ENSG00000101146	ENSG00000125656
		ENSG00000112029	ENSG00000164828			ENSG00000074266	ENSG00000070501	ENSG00000101182	ENSG00000125691
		ENSG00000112118	ENSG00000165030			ENSG00000075131	ENSG00000070610	ENSG00000101361	ENSG00000126005
		ENSG00000112249	ENSG00000165102			ENSG00000075391	ENSG00000070882	ENSG00000101955	ENSG00000126368
		ENSG00000112984	ENSG00000166073			ENSG00000075618	ENSG00000071189	ENSG00000102393	ENSG00000126432
		ENSG00000113356	ENSG00000166272			ENSG00000076003	ENSG00000071553	ENSG00000102898	ENSG00000126804
		ENSG00000113580	ENSG00000167508			ENSG00000076248	ENSG00000071626	ENSG00000102977	ENSG00000128534
		ENSG00000113716	ENSG00000167996			ENSG00000076356	ENSG00000071655	ENSG00000103194	ENSG00000128609
		ENSG00000114270	ENSG00000168405			ENSG00000076513	ENSG00000071889	ENSG00000103202	ENSG00000128989
		ENSG00000114520	ENSG00000168679			ENSG00000077147	ENSG00000072195	ENSG00000103254	ENSG00000130748
		ENSG00000114686	ENSG00000169760			ENSG00000077157	ENSG00000072401	ENSG00000103266	ENSG00000130764
		ENSG00000114767	ENSG00000170214			ENSG00000077235	ENSG00000072571	ENSG00000103479	ENSG00000131188
		ENSG00000115053	ENSG00000170385			ENSG00000077254	ENSG00000072609	ENSG00000104131	ENSG00000131446
		ENSG00000115159	ENSG00000172059			ENSG00000077312	ENSG00000072786	ENSG00000104853	ENSG00000131788
		ENSG00000115364	ENSG00000172890			ENSG00000077348	ENSG00000072958	ENSG00000104856	ENSG00000133226
		ENSG00000115687	ENSG00000172893			ENSG00000077454	ENSG00000073969	ENSG00000104884	ENSG00000133597
		ENSG00000115694	ENSG00000173064			ENSG00000077514	ENSG00000074410	ENSG00000105122	ENSG00000133818
		ENSG00000115840	ENSG00000173209			ENSG00000078246	ENSG00000074590	ENSG00000105197	ENSG00000134222
		ENSG00000115884	ENSG00000173281			ENSG00000078304	ENSG00000075223	ENSG00000105202	ENSG00000134419
		ENSG00000116062	ENSG00000173391			ENSG00000078403	ENSG00000075240	ENSG00000105220	ENSG00000135002
		ENSG00000116120	ENSG00000173482			ENSG00000079156	ENSG00000075292	ENSG00000105258	ENSG00000135736
		ENSG00000116132	ENSG00000173812			ENSG00000079277	ENSG00000075303	ENSG00000105327	ENSG00000135766
		ENSG00000117650	ENSG00000174437			ENSG00000079308	ENSG00000075568	ENSG00000105419	ENSG00000135835
		ENSG00000117724	ENSG00000179094			ENSG00000079459	ENSG00000076067	ENSG00000105677	ENSG00000136153
		ENSG00000117899	ENSG00000180011			ENSG00000079482	ENSG00000076770	ENSG00000105738	ENSG00000136866
		ENSG00000117906	ENSG00000180573			ENSG00000079785	ENSG00000077232	ENSG00000106153	ENSG00000136930
		ENSG00000118193	ENSG00000180914			ENSG00000079819	ENSG00000077458	ENSG00000106605	ENSG00000137100
		ENSG00000118246	ENSG00000182492			ENSG00000079999	ENSG00000078098	ENSG00000106628	ENSG00000138080
		ENSG00000118418	ENSG00000183722			ENSG00000080493	ENSG00000078177	ENSG00000106799	ENSG00000138386
		ENSG00000118655	ENSG00000184584			ENSG00000080608	ENSG00000078747	ENSG00000107186	ENSG00000139433
		ENSG00000118894	ENSG00000185070			ENSG00000080709	ENSG00000078808	ENSG00000107249	ENSG00000140406
		ENSG00000119397	ENSG00000185532			ENSG00000080839	ENSG00000078902	ENSG00000107281	ENSG00000140988
		ENSG00000119403	ENSG00000185920			ENSG00000081320	ENSG00000079435	ENSG00000107949	ENSG00000141552
		ENSG00000119953	ENSG00000186001			ENSG00000081692	ENSG00000079616	ENSG00000107951	ENSG00000141698
		ENSG00000119969	ENSG00000186480			ENSG00000081803	ENSG00000079841	ENSG00000107959	ENSG00000141905
		ENSG00000120800	ENSG00000187391			ENSG00000082482	ENSG00000080345	ENSG00000108010	ENSG00000141933
		ENSG00000121057	ENSG00000189223			ENSG00000082781	ENSG00000080822	ENSG00000108344	ENSG00000142186
		ENSG00000121716	ENSG00000196507			ENSG00000083520	ENSG00000080845	ENSG00000108439	ENSG00000142544
		ENSG00000121774	ENSG00000196517			ENSG00000083857	ENSG00000082512	ENSG00000108518	ENSG00000142546
		ENSG00000122566	ENSG00000196961			ENSG00000084070	ENSG00000083097	ENSG00000108561	ENSG00000142694
		ENSG00000122873	ENSG00000197142			ENSG00000084090	ENSG00000083444	ENSG00000109220	ENSG00000143353
		ENSG00000122966	ENSG00000197712			ENSG00000084623	ENSG00000083535	ENSG00000109929	ENSG00000143376
		ENSG00000123505	ENSG00000197948			ENSG00000084733	ENSG00000083896	ENSG00000110031	ENSG00000145012
		ENSG00000123545	ENSG00000197969			ENSG00000085063	ENSG00000083937	ENSG00000110048	ENSG00000147140
		ENSG00000123737	ENSG00000198911			ENSG00000085840	ENSG00000084093	ENSG00000110092	ENSG00000147604
		ENSG00000124787	ENSG00000205181			ENSG00000085999	ENSG00000084207	ENSG00000110108	ENSG00000149923
		ENSG00000124789	ENSG00000205560			ENSG00000086102	ENSG00000084234	ENSG00000110200	ENSG00000152082
		ENSG00000125520	ENSG00000206538			ENSG00000087086	ENSG00000084636	ENSG00000110367	ENSG00000152518
		ENSG00000126787	ENSG00000214548			ENSG00000087088	ENSG00000084731	ENSG00000110660	ENSG00000152784
		ENSG00000126953	ENSG00000214717			ENSG00000087152	ENSG00000085365	ENSG00000110917	ENSG00000153443
		ENSG00000127337	ENSG00000215252			ENSG00000087245	ENSG00000085491	ENSG00000111266	ENSG00000153885
		ENSG00000127528	ENSG00000221852			ENSG00000087338	ENSG00000085662	ENSG00000111361	ENSG00000154945
		ENSG00000128059	ENSG00000221968			ENSG00000087586	ENSG00000086232	ENSG00000111540	ENSG00000155876
		ENSG00000129173	ENSG00000221978			ENSG00000088832	ENSG00000086544	ENSG00000111639	ENSG00000156411
		ENSG00000129355	ENSG00000223403			ENSG00000088854	ENSG00000086570	ENSG00000111667	ENSG00000156467
		ENSG00000131153	ENSG00000232815			ENSG00000089050	ENSG00000086758	ENSG00000111786	ENSG00000156482
		ENSG00000131323	ENSG00000247828			ENSG00000089057	ENSG00000086991	ENSG00000111799	ENSG00000156860
		ENSG00000131747	ENSG00000250305			ENSG00000089094	ENSG00000087077	ENSG00000111877	ENSG00000157613
		ENSG00000132356	ENSG00000251562			ENSG00000089280	ENSG00000087301	ENSG00000112183	ENSG00000157637
		ENSG00000132436	ENSG00000257923			ENSG00000089685	ENSG00000087502	ENSG00000112242	ENSG00000159335
		ENSG00000132646	ENSG00000261888			ENSG00000089737	ENSG00000087510	ENSG00000112578	ENSG00000160113
		ENSG00000132688	ENSG00000275074			ENSG00000090621	ENSG00000088038	ENSG00000112852	ENSG00000160298
		ENSG00000132780	ENSG00000276550			ENSG00000090686	ENSG00000088305	ENSG00000112893	ENSG00000160551
		ENSG00000132967	ENSG00000281490			ENSG00000090971	ENSG00000088808	ENSG00000112992	ENSG00000160741
		ENSG00000133119				ENSG00000091127	ENSG00000088812	ENSG00000113594	ENSG00000160813
		ENSG00000133316				ENSG00000091483	ENSG00000089335	ENSG00000113648	ENSG00000161904
		ENSG00000134057				ENSG00000091490	ENSG00000089902	ENSG00000114026	ENSG00000162378
		ENSG00000134070				ENSG00000092010	ENSG00000090447	ENSG00000114353	ENSG00000162636
		ENSG00000134222				ENSG00000092199	ENSG00000090565	ENSG00000114738	ENSG00000162702
		ENSG00000134574				ENSG00000092470	ENSG00000090581	ENSG00000114948	ENSG00000162783
		ENSG00000134697				ENSG00000092853	ENSG00000091009	ENSG00000115310	ENSG00000162889
		ENSG00000134758				ENSG00000093009	ENSG00000091732	ENSG00000115946	ENSG00000163701
		ENSG00000135048				ENSG00000094804	ENSG00000092020	ENSG00000116035	ENSG00000163788
		ENSG00000135372				ENSG00000095002	ENSG00000092094	ENSG00000116095	ENSG00000163848
		ENSG00000135446				ENSG00000095321	ENSG00000092148	ENSG00000116221	ENSG00000164104
		ENSG00000135451				ENSG00000096746	ENSG00000092295	ENSG00000116455	ENSG00000164114
		ENSG00000135486				ENSG00000099194	ENSG00000092330	ENSG00000116649	ENSG00000164442
		ENSG00000135763				ENSG00000099624	ENSG00000092871	ENSG00000116704	ENSG00000164919
		ENSG00000135913				ENSG00000099800	ENSG00000093167	ENSG00000116871	ENSG00000165169
		ENSG00000136122				ENSG00000099810	ENSG00000094916	ENSG00000117133	ENSG00000165775
		ENSG00000136444				ENSG00000099821	ENSG00000095059	ENSG00000117335	ENSG00000165898
		ENSG00000136478				ENSG00000099860	ENSG00000095139	ENSG00000117419	ENSG00000166225
		ENSG00000136492				ENSG00000099991	ENSG00000095261	ENSG00000117569	ENSG00000166337
		ENSG00000136709				ENSG00000100297	ENSG00000095303	ENSG00000117676	ENSG00000166479
		ENSG00000136811				ENSG00000100350	ENSG00000099364	ENSG00000117751	ENSG00000166801
		ENSG00000136982				ENSG00000100413	ENSG00000099365	ENSG00000118507	ENSG00000166833
		ENSG00000137040				ENSG00000100422	ENSG00000099822	ENSG00000118600	ENSG00000166886
		ENSG00000137310				ENSG00000100479	ENSG00000099917	ENSG00000118762	ENSG00000166913
		ENSG00000137574				ENSG00000100526	ENSG00000099953	ENSG00000119335	ENSG00000167074
		ENSG00000137962				ENSG00000100697	ENSG00000099956	ENSG00000119402	ENSG00000167136
		ENSG00000138095				ENSG00000100722	ENSG00000100105	ENSG00000119599	ENSG00000167978
		ENSG00000138346				ENSG00000100813	ENSG00000100106	ENSG00000119616	ENSG00000168066
		ENSG00000138398				ENSG00000100911	ENSG00000100241	ENSG00000119729	ENSG00000168092
		ENSG00000138434				ENSG00000100918	ENSG00000100242	ENSG00000119986	ENSG00000168172
		ENSG00000138778				ENSG00000100994	ENSG00000100263	ENSG00000120008	ENSG00000168906
		ENSG00000139354				ENSG00000101003	ENSG00000100281	ENSG00000120129	ENSG00000168944
		ENSG00000139405				ENSG00000101224	ENSG00000100284	ENSG00000120658	ENSG00000169018
		ENSG00000139438				ENSG00000101347	ENSG00000100300	ENSG00000120675	ENSG00000169021
		ENSG00000140451				ENSG00000101407	ENSG00000100319	ENSG00000120742	ENSG00000169223
		ENSG00000140937				ENSG00000101412	ENSG00000100354	ENSG00000120948	ENSG00000169967
		ENSG00000141076				ENSG00000101680	ENSG00000100364	ENSG00000121281	ENSG00000170734
		ENSG00000141569				ENSG00000101745	ENSG00000100393	ENSG00000122085	ENSG00000170955
		ENSG00000141682				ENSG00000101773	ENSG00000100401	ENSG00000122140	ENSG00000171222
		ENSG00000141858				ENSG00000101871	ENSG00000100417	ENSG00000122691	ENSG00000171443
		ENSG00000141985				ENSG00000101911	ENSG00000100483	ENSG00000122705	ENSG00000172216
		ENSG00000142207				ENSG00000102038	ENSG00000100523	ENSG00000122884	ENSG00000172269
		ENSG00000142945				ENSG00000102125	ENSG00000100528	ENSG00000123179	ENSG00000172845
		ENSG00000143153				ENSG00000102189	ENSG00000100600	ENSG00000123416	ENSG00000172869
		ENSG00000143179				ENSG00000102265	ENSG00000100603	ENSG00000123685	ENSG00000173153
		ENSG00000143228				ENSG00000102547	ENSG00000100664	ENSG00000123992	ENSG00000173272
		ENSG00000143476				ENSG00000102580	ENSG00000100852	ENSG00000124226	ENSG00000173889
		ENSG00000143493				ENSG00000102699	ENSG00000100997	ENSG00000124535	ENSG00000174307
		ENSG00000143799				ENSG00000103111	ENSG00000101138	ENSG00000124733	ENSG00000174446
		ENSG00000143889				ENSG00000103222	ENSG00000101160	ENSG00000124788	ENSG00000174574
		ENSG00000144028				ENSG00000103260	ENSG00000101194	ENSG00000125445	ENSG00000174695
		ENSG00000144354				ENSG00000103356	ENSG00000101421	ENSG00000125844	ENSG00000175416
		ENSG00000144355				ENSG00000103365	ENSG00000101439	ENSG00000125944	ENSG00000175455
		ENSG00000145414				ENSG00000103415	ENSG00000101752	ENSG00000126005	ENSG00000175826
		ENSG00000145431				ENSG00000103502	ENSG00000101849	ENSG00000126464	ENSG00000176022
		ENSG00000145685				ENSG00000103769	ENSG00000101888	ENSG00000126602	ENSG00000176101
		ENSG00000146143				ENSG00000103888	ENSG00000101966	ENSG00000126698	ENSG00000176396
		ENSG00000146263				ENSG00000104093	ENSG00000102081	ENSG00000126749	ENSG00000176731
		ENSG00000146281				ENSG00000104164	ENSG00000102096	ENSG00000127526	ENSG00000176788
		ENSG00000146872				ENSG00000104177	ENSG00000102103	ENSG00000127530	ENSG00000177374
		ENSG00000146963				ENSG00000104320	ENSG00000102225	ENSG00000127616	ENSG00000177426
		ENSG00000147274				ENSG00000104324	ENSG00000102287	ENSG00000128692	ENSG00000177888
		ENSG00000147649				ENSG00000104332	ENSG00000102317	ENSG00000128881	ENSG00000177943
		ENSG00000148296				ENSG00000104522	ENSG00000102384	ENSG00000129003	ENSG00000178982
		ENSG00000148334				ENSG00000104524	ENSG00000102572	ENSG00000129675	ENSG00000179387
		ENSG00000149054				ENSG00000104687	ENSG00000102575	ENSG00000130005	ENSG00000179632
		ENSG00000149308				ENSG00000104738	ENSG00000102595	ENSG00000130165	ENSG00000179862
		ENSG00000149554				ENSG00000104824	ENSG00000102786	ENSG00000130224	ENSG00000179943
		ENSG00000149636				ENSG00000104852	ENSG00000102893	ENSG00000130511	ENSG00000179965
		ENSG00000149679				ENSG00000105325	ENSG00000102901	ENSG00000130522	ENSG00000181284
		ENSG00000152240				ENSG00000105355	ENSG00000102910	ENSG00000130748	ENSG00000181481
		ENSG00000152413				ENSG00000105443	ENSG00000102974	ENSG00000130749	ENSG00000181722
		ENSG00000152518				ENSG00000105483	ENSG00000103037	ENSG00000130956	ENSG00000182087
		ENSG00000152795				ENSG00000105516	ENSG00000103061	ENSG00000131069	ENSG00000184743
		ENSG00000153187				ENSG00000105722	ENSG00000103148	ENSG00000131188	ENSG00000184897
		ENSG00000153820				ENSG00000105877	ENSG00000103257	ENSG00000131238	ENSG00000184900
		ENSG00000154743				ENSG00000105926	ENSG00000103264	ENSG00000132361	ENSG00000185219
		ENSG00000155380				ENSG00000105971	ENSG00000103429	ENSG00000132382	ENSG00000185338
		ENSG00000156017				ENSG00000105974	ENSG00000103495	ENSG00000132394	ENSG00000185900
		ENSG00000156103				ENSG00000106003	ENSG00000103512	ENSG00000132463	ENSG00000186395
		ENSG00000156136				ENSG00000106034	ENSG00000103540	ENSG00000132507	ENSG00000187815
		ENSG00000156471				ENSG00000106070	ENSG00000103647	ENSG00000132600	ENSG00000188186
		ENSG00000156802				ENSG00000106080	ENSG00000103966	ENSG00000132661	ENSG00000189114
		ENSG00000157036				ENSG00000106105	ENSG00000103995	ENSG00000133026	ENSG00000196083
		ENSG00000157168				ENSG00000106144	ENSG00000104064	ENSG00000133027	ENSG00000196419
		ENSG00000157212				ENSG00000106392	ENSG00000104067	ENSG00000133065	ENSG00000196628
		ENSG00000157240				ENSG00000106443	ENSG00000104142	ENSG00000133138	ENSG00000197912
		ENSG00000157456				ENSG00000106459	ENSG00000104147	ENSG00000133265	ENSG00000198252
		ENSG00000158402				ENSG00000106537	ENSG00000104228	ENSG00000133818	ENSG00000198258
		ENSG00000158417				ENSG00000106608	ENSG00000104299	ENSG00000133935	ENSG00000198420
		ENSG00000159131				ENSG00000106624	ENSG00000104343	ENSG00000134046	ENSG00000198695
		ENSG00000159208				ENSG00000106683	ENSG00000104368	ENSG00000134308	ENSG00000198712
		ENSG00000159259				ENSG00000106829	ENSG00000104472	ENSG00000134324	ENSG00000198727
		ENSG00000159593				ENSG00000107104	ENSG00000104529	ENSG00000134352	ENSG00000198763
		ENSG00000160299				ENSG00000107263	ENSG00000104611	ENSG00000134668	ENSG00000198786
		ENSG00000160949				ENSG00000107290	ENSG00000104671	ENSG00000134851	ENSG00000198804
		ENSG00000161692				ENSG00000107438	ENSG00000104756	ENSG00000135002	ENSG00000198838
		ENSG00000162062				ENSG00000107537	ENSG00000104763	ENSG00000135521	ENSG00000198886
		ENSG00000162063				ENSG00000107581	ENSG00000104774	ENSG00000135624	ENSG00000198888
		ENSG00000162073				ENSG00000107815	ENSG00000104870	ENSG00000135632	ENSG00000198899
		ENSG00000162636				ENSG00000107863	ENSG00000104872	ENSG00000135643	ENSG00000198918
		ENSG00000162664				ENSG00000107957	ENSG00000104899	ENSG00000135766	ENSG00000198938
		ENSG00000162745				ENSG00000107984	ENSG00000104904	ENSG00000135845	ENSG00000203875
		ENSG00000162851				ENSG00000108021	ENSG00000104957	ENSG00000136002	ENSG00000204186
		ENSG00000163093				ENSG00000108379	ENSG00000104960	ENSG00000136010	ENSG00000204262
		ENSG00000163428				ENSG00000108654	ENSG00000104964	ENSG00000136026	ENSG00000204356
		ENSG00000163655				ENSG00000108828	ENSG00000104973	ENSG00000136104	ENSG00000204590
		ENSG00000163918				ENSG00000109046	ENSG00000105135	ENSG00000136463	ENSG00000205423
		ENSG00000163930				ENSG00000109111	ENSG00000105176	ENSG00000136718	ENSG00000205765
		ENSG00000163938				ENSG00000109320	ENSG00000105223	ENSG00000136802	ENSG00000205903
		ENSG00000163950				ENSG00000109436	ENSG00000105298	ENSG00000136869	ENSG00000212907
		ENSG00000164045				ENSG00000109536	ENSG00000105341	ENSG00000137309	ENSG00000213015
		ENSG00000164104				ENSG00000110218	ENSG00000105372	ENSG00000137672	ENSG00000213064
		ENSG00000164163				ENSG00000110274	ENSG00000105404	ENSG00000137714	ENSG00000213453
		ENSG00000164323				ENSG00000110619	ENSG00000105429	ENSG00000137845	ENSG00000213563
		ENSG00000164402				ENSG00000110693	ENSG00000105472	ENSG00000137936	ENSG00000213639
		ENSG00000164403				ENSG00000110756	ENSG00000105497	ENSG00000138032	ENSG00000213741
		ENSG00000164466				ENSG00000110921	ENSG00000105656	ENSG00000138074	ENSG00000213903
		ENSG00000164548				ENSG00000111052	ENSG00000105698	ENSG00000138246	ENSG00000214087
		ENSG00000164611				ENSG00000111057	ENSG00000105699	ENSG00000138363	ENSG00000218891
		ENSG00000164649				ENSG00000111252	ENSG00000105701	ENSG00000138413	ENSG00000221890
		ENSG00000164754				ENSG00000111276	ENSG00000105717	ENSG00000138442	ENSG00000224094
		ENSG00000165119				ENSG00000111331	ENSG00000105810	ENSG00000138668	ENSG00000224877
		ENSG00000165244				ENSG00000111358	ENSG00000106009	ENSG00000138735	ENSG00000225973
		ENSG00000165264				ENSG00000111530	ENSG00000106245	ENSG00000139112	ENSG00000227671
		ENSG00000165271				ENSG00000111605	ENSG00000106333	ENSG00000139154	ENSG00000228253
		ENSG00000165724				ENSG00000111640	ENSG00000106367	ENSG00000139266	ENSG00000228300
		ENSG00000165801				ENSG00000111647	ENSG00000106397	ENSG00000139304	ENSG00000229344
		ENSG00000165868				ENSG00000111817	ENSG00000106546	ENSG00000139428	ENSG00000233016
		ENSG00000165891				ENSG00000111845	ENSG00000106603	ENSG00000139629	ENSG00000233608
		ENSG00000166181				ENSG00000112029	ENSG00000106636	ENSG00000140280	ENSG00000236287
		ENSG00000166197				ENSG00000112118	ENSG00000106665	ENSG00000140406	ENSG00000237973
		ENSG00000166508				ENSG00000112208	ENSG00000106692	ENSG00000140859	ENSG00000238197
		ENSG00000166801				ENSG00000112210	ENSG00000106723	ENSG00000140988	ENSG00000239264
		ENSG00000166851				ENSG00000112249	ENSG00000106780	ENSG00000141258	ENSG00000243449
		ENSG00000167258				ENSG00000112308	ENSG00000106803	ENSG00000141349	ENSG00000244586
		ENSG00000167513				ENSG00000112414	ENSG00000106804	ENSG00000141504	ENSG00000245680
		ENSG00000167670				ENSG00000112511	ENSG00000107036	ENSG00000141543	ENSG00000245910
		ENSG00000167747				ENSG00000112531	ENSG00000107341	ENSG00000141556	ENSG00000247556
		ENSG00000168116				ENSG00000112640	ENSG00000107404	ENSG00000141627	ENSG00000247627
		ENSG00000168264				ENSG00000112972	ENSG00000107560	ENSG00000141696	ENSG00000248527
		ENSG00000168496				ENSG00000112983	ENSG00000107625	ENSG00000141698	ENSG00000249456
		ENSG00000168906				ENSG00000112984	ENSG00000107643	ENSG00000142544	ENSG00000251493
		ENSG00000169045				ENSG00000113356	ENSG00000107745	ENSG00000142784	ENSG00000251562
		ENSG00000169188				ENSG00000113456	ENSG00000107779	ENSG00000142798	ENSG00000257704
		ENSG00000169679				ENSG00000113580	ENSG00000107872	ENSG00000142871	ENSG00000258768
		ENSG00000169684				ENSG00000113716	ENSG00000108001	ENSG00000143157	ENSG00000259479
		ENSG00000169813				ENSG00000114107	ENSG00000108055	ENSG00000143158	ENSG00000260001
		ENSG00000170037				ENSG00000114270	ENSG00000108091	ENSG00000143190	ENSG00000260916
		ENSG00000170144				ENSG00000114416	ENSG00000108106	ENSG00000143226	ENSG00000261221
		ENSG00000170540				ENSG00000114439	ENSG00000108107	ENSG00000143248	ENSG00000263740
		ENSG00000170854				ENSG00000114520	ENSG00000108256	ENSG00000143294	ENSG00000264112
		ENSG00000171320				ENSG00000114650	ENSG00000108298	ENSG00000143368	ENSG00000267519
		ENSG00000171451				ENSG00000114686	ENSG00000108306	ENSG00000143569	ENSG00000269713
		ENSG00000171914				ENSG00000114767	ENSG00000108312	ENSG00000143641	ENSG00000271303
		ENSG00000172061				ENSG00000114859	ENSG00000108395	ENSG00000143793	ENSG00000272129
		ENSG00000172432				ENSG00000115053	ENSG00000108465	ENSG00000143811	ENSG00000272933
		ENSG00000172716				ENSG00000115159	ENSG00000108479	ENSG00000144021	ENSG00000274523
		ENSG00000173145				ENSG00000115295	ENSG00000108582	ENSG00000144848	ENSG00000275832
		ENSG00000173456				ENSG00000115306	ENSG00000108784	ENSG00000144935	ENSG00000276168
		ENSG00000173473				ENSG00000115364	ENSG00000108848	ENSG00000145216	ENSG00000277791
		ENSG00000173638				ENSG00000115419	ENSG00000108852	ENSG00000145819	ENSG00000278771
		ENSG00000173848				ENSG00000115524	ENSG00000108953	ENSG00000145912	ENSG00000279170
		ENSG00000173894				ENSG00000115526	ENSG00000108960	ENSG00000146007	ENSG00000280435
		ENSG00000174371				ENSG00000115687	ENSG00000109066	ENSG00000146242	ENSG00000285793
		ENSG00000174780				ENSG00000115694	ENSG00000109079	ENSG00000146540	ENSG00000286067
		ENSG00000175137				ENSG00000115839	ENSG00000109084	ENSG00000146950
		ENSG00000175216				ENSG00000115840	ENSG00000109184	ENSG00000147044
		ENSG00000175305				ENSG00000115884	ENSG00000109610	ENSG00000147065
		ENSG00000175643				ENSG00000115993	ENSG00000109674	ENSG00000147119
		ENSG00000176208				ENSG00000116062	ENSG00000109680	ENSG00000147224
		ENSG00000176788				ENSG00000116096	ENSG00000109685	ENSG00000147592
		ENSG00000177606				ENSG00000116106	ENSG00000109686	ENSG00000147654
		ENSG00000177613				ENSG00000116120	ENSG00000109738	ENSG00000147684
		ENSG00000177707				ENSG00000116132	ENSG00000109790	ENSG00000147813
		ENSG00000177917				ENSG00000116133	ENSG00000109805	ENSG00000147955
		ENSG00000178035				ENSG00000116191	ENSG00000109920	ENSG00000148832
		ENSG00000178409				ENSG00000116473	ENSG00000110047	ENSG00000148840
		ENSG00000178966				ENSG00000116580	ENSG00000110060	ENSG00000149201
		ENSG00000179958				ENSG00000116641	ENSG00000110344	ENSG00000150687
		ENSG00000180611				ENSG00000116717	ENSG00000110395	ENSG00000150764
		ENSG00000181104				ENSG00000116729	ENSG00000110696	ENSG00000151014
		ENSG00000182180				ENSG00000116786	ENSG00000110700	ENSG00000151465
		ENSG00000183741				ENSG00000116918	ENSG00000110811	ENSG00000151474
		ENSG00000183856				ENSG00000117155	ENSG00000110931	ENSG00000151893
		ENSG00000184007				ENSG00000117226	ENSG00000111206	ENSG00000152936
		ENSG00000184178				ENSG00000117298	ENSG00000111300	ENSG00000153551
		ENSG00000184897				ENSG00000117500	ENSG00000111424	ENSG00000154102
		ENSG00000184992				ENSG00000117525	ENSG00000111450	ENSG00000154328
		ENSG00000185115				ENSG00000117533	ENSG00000111642	ENSG00000154721
		ENSG00000185361				ENSG00000117592	ENSG00000111674	ENSG00000154727
		ENSG00000185504				ENSG00000117594	ENSG00000111676	ENSG00000154734
		ENSG00000185697				ENSG00000117597	ENSG00000111696	ENSG00000156931
		ENSG00000185989				ENSG00000117650	ENSG00000111707	ENSG00000156973
		ENSG00000186283				ENSG00000117724	ENSG00000111731	ENSG00000156976
		ENSG00000186767				ENSG00000117899	ENSG00000111788	ENSG00000157014
		ENSG00000187109				ENSG00000117906	ENSG00000111802	ENSG00000157445
		ENSG00000188342				ENSG00000118193	ENSG00000111846	ENSG00000157514
		ENSG00000188529				ENSG00000118246	ENSG00000111885	ENSG00000157796
		ENSG00000188807				ENSG00000118257	ENSG00000111981	ENSG00000158042
		ENSG00000189046				ENSG00000118363	ENSG00000112110	ENSG00000158292
		ENSG00000189057				ENSG00000118418	ENSG00000112234	ENSG00000158717
		ENSG00000189060				ENSG00000118473	ENSG00000112357	ENSG00000159346
		ENSG00000189266				ENSG00000118523	ENSG00000112365	ENSG00000159720
		ENSG00000189308				ENSG00000118655	ENSG00000112419	ENSG00000159873
		ENSG00000189403				ENSG00000118689	ENSG00000112473	ENSG00000160310
		ENSG00000196072				ENSG00000118855	ENSG00000112667	ENSG00000160392
		ENSG00000196460				ENSG00000118894	ENSG00000112695	ENSG00000160818
		ENSG00000196504				ENSG00000118922	ENSG00000112697	ENSG00000160961
		ENSG00000196584				ENSG00000119048	ENSG00000112701	ENSG00000160999
		ENSG00000196611				ENSG00000119396	ENSG00000112773	ENSG00000161682
		ENSG00000197442				ENSG00000119397	ENSG00000112851	ENSG00000162139
		ENSG00000197771				ENSG00000119401	ENSG00000112902	ENSG00000162512
		ENSG00000198000				ENSG00000119403	ENSG00000112941	ENSG00000162687
		ENSG00000198056				ENSG00000119487	ENSG00000112977	ENSG00000162729
		ENSG00000198168				ENSG00000119655	ENSG00000113194	ENSG00000162783
		ENSG00000198176				ENSG00000119681	ENSG00000113318	ENSG00000162817
		ENSG00000198498				ENSG00000119865	ENSG00000113387	ENSG00000162836
		ENSG00000198554				ENSG00000119912	ENSG00000113441	ENSG00000162869
		ENSG00000198690				ENSG00000119953	ENSG00000113552	ENSG00000162909
		ENSG00000198824				ENSG00000119969	ENSG00000113558	ENSG00000163132
		ENSG00000198901				ENSG00000120337	ENSG00000113578	ENSG00000163214
		ENSG00000205581				ENSG00000120437	ENSG00000113593	ENSG00000163382
		ENSG00000205683				ENSG00000120708	ENSG00000113657	ENSG00000163558
		ENSG00000213047				ENSG00000120709	ENSG00000113658	ENSG00000163636
		ENSG00000213190				ENSG00000120800	ENSG00000113719	ENSG00000163815
		ENSG00000213347				ENSG00000120992	ENSG00000113758	ENSG00000163932
		ENSG00000213390				ENSG00000121039	ENSG00000113971	ENSG00000164053
		ENSG00000213445				ENSG00000121057	ENSG00000114062	ENSG00000164251
		ENSG00000213967				ENSG00000121067	ENSG00000114127	ENSG00000164418
		ENSG00000214022				ENSG00000121361	ENSG00000114251	ENSG00000164442
		ENSG00000214357				ENSG00000121671	ENSG00000114331	ENSG00000164463
		ENSG00000214753				ENSG00000121716	ENSG00000114388	ENSG00000164543
		ENSG00000234616				ENSG00000121743	ENSG00000114450	ENSG00000164818
		ENSG00000246067				ENSG00000121774	ENSG00000114529	ENSG00000164885
		ENSG00000253304				ENSG00000121957	ENSG00000114554	ENSG00000164897
		ENSG00000270647				ENSG00000122042	ENSG00000114648	ENSG00000164970
		ENSG00000274523				ENSG00000122068	ENSG00000114857	ENSG00000165124
		ENSG00000275835				ENSG00000122218	ENSG00000114861	ENSG00000165219
		ENSG00000276043				ENSG00000122566	ENSG00000114988	ENSG00000165283
		ENSG00000277161				ENSG00000122862	ENSG00000115042	ENSG00000165312
		ENSG00000278259				ENSG00000122873	ENSG00000115128	ENSG00000165733
						ENSG00000122966	ENSG00000115170	ENSG00000166167
						ENSG00000123095	ENSG00000115207	ENSG00000166337
						ENSG00000123240	ENSG00000115216	ENSG00000166582
						ENSG00000123352	ENSG00000115239	ENSG00000166716
						ENSG00000123505	ENSG00000115275	ENSG00000166825
						ENSG00000123545	ENSG00000115318	ENSG00000166839
						ENSG00000123737	ENSG00000115368	ENSG00000166888
						ENSG00000123983	ENSG00000115392	ENSG00000167004
						ENSG00000124145	ENSG00000115446	ENSG00000167085
						ENSG00000124222	ENSG00000115504	ENSG00000167112
						ENSG00000124299	ENSG00000115657	ENSG00000167136
						ENSG00000124532	ENSG00000116251	ENSG00000167272
						ENSG00000124762	ENSG00000116406	ENSG00000167378
						ENSG00000124787	ENSG00000116478	ENSG00000167766
						ENSG00000124789	ENSG00000116489	ENSG00000167842
						ENSG00000124942	ENSG00000116497	ENSG00000168040
						ENSG00000125447	ENSG00000116560	ENSG00000168061
						ENSG00000125484	ENSG00000116747	ENSG00000168522
						ENSG00000125503	ENSG00000116754	ENSG00000168564
						ENSG00000125520	ENSG00000116809	ENSG00000168615
						ENSG00000125676	ENSG00000117010	ENSG00000168785
						ENSG00000125730	ENSG00000117020	ENSG00000168944
						ENSG00000125744	ENSG00000117036	ENSG00000169021
						ENSG00000125772	ENSG00000117152	ENSG00000169230
						ENSG00000125967	ENSG00000117228	ENSG00000169288
						ENSG00000125968	ENSG00000117360	ENSG00000169855
						ENSG00000125977	ENSG00000117448	ENSG00000169857
						ENSG00000126226	ENSG00000117620	ENSG00000169976
						ENSG00000126368	ENSG00000117640	ENSG00000170633
						ENSG00000126787	ENSG00000118046	ENSG00000170876
						ENSG00000126790	ENSG00000118096	ENSG00000171067
						ENSG00000126953	ENSG00000118181	ENSG00000171314
						ENSG00000127337	ENSG00000118260	ENSG00000171453
						ENSG00000127481	ENSG00000118495	ENSG00000171490
						ENSG00000127483	ENSG00000118680	ENSG00000171530
						ENSG00000127528	ENSG00000118873	ENSG00000171724
						ENSG00000128059	ENSG00000119509	ENSG00000171853
						ENSG00000128272	ENSG00000119522	ENSG00000172037
						ENSG00000128641	ENSG00000119661	ENSG00000172216
						ENSG00000128928	ENSG00000119669	ENSG00000172239
						ENSG00000129173	ENSG00000119705	ENSG00000172301
						ENSG00000129355	ENSG00000119707	ENSG00000172366
						ENSG00000129515	ENSG00000119760	ENSG00000173141
						ENSG00000129667	ENSG00000119906	ENSG00000173275
						ENSG00000130052	ENSG00000119917	ENSG00000173402
						ENSG00000130150	ENSG00000119938	ENSG00000173457
						ENSG00000130164	ENSG00000119977	ENSG00000173465
						ENSG00000130175	ENSG00000120314	ENSG00000173681
						ENSG00000130254	ENSG00000120334	ENSG00000174136
						ENSG00000130270	ENSG00000120539	ENSG00000174233
						ENSG00000130313	ENSG00000120686	ENSG00000174307
						ENSG00000130396	ENSG00000120693	ENSG00000174446
						ENSG00000130508	ENSG00000120696	ENSG00000174977
						ENSG00000130529	ENSG00000120784	ENSG00000175166
						ENSG00000130764	ENSG00000120889	ENSG00000175183
						ENSG00000130766	ENSG00000120896	ENSG00000175334
						ENSG00000130818	ENSG00000120963	ENSG00000175602
						ENSG00000130821	ENSG00000121152	ENSG00000175792
						ENSG00000130881	ENSG00000121210	ENSG00000175806
						ENSG00000131080	ENSG00000121274	ENSG00000176022
						ENSG00000131149	ENSG00000121289	ENSG00000176046
						ENSG00000131153	ENSG00000121481	ENSG00000176105
						ENSG00000131323	ENSG00000121749	ENSG00000176124
						ENSG00000131375	ENSG00000121864	ENSG00000176340
						ENSG00000131437	ENSG00000122008	ENSG00000176396
						ENSG00000131507	ENSG00000122482	ENSG00000176422
						ENSG00000131584	ENSG00000122484	ENSG00000176678
						ENSG00000131626	ENSG00000122557	ENSG00000176894
						ENSG00000131634	ENSG00000122592	ENSG00000176928
						ENSG00000131653	ENSG00000122643	ENSG00000177156
						ENSG00000131711	ENSG00000122644	ENSG00000177192
						ENSG00000131747	ENSG00000122694	ENSG00000177311
						ENSG00000131759	ENSG00000122870	ENSG00000177694
						ENSG00000131773	ENSG00000123080	ENSG00000177706
						ENSG00000132196	ENSG00000123143	ENSG00000177732
						ENSG00000132256	ENSG00000123144	ENSG00000177889
						ENSG00000132274	ENSG00000123146	ENSG00000178464
						ENSG00000132326	ENSG00000123159	ENSG00000178741
						ENSG00000132356	ENSG00000123388	ENSG00000179041
						ENSG00000132359	ENSG00000123473	ENSG00000179115
						ENSG00000132405	ENSG00000123485	ENSG00000179271
						ENSG00000132424	ENSG00000123552	ENSG00000179364
						ENSG00000132436	ENSG00000123575	ENSG00000179409
						ENSG00000132471	ENSG00000123607	ENSG00000179431
						ENSG00000132561	ENSG00000123684	ENSG00000179943
						ENSG00000132646	ENSG00000123728	ENSG00000179965
						ENSG00000132688	ENSG00000123989	ENSG00000180447
						ENSG00000132694	ENSG00000124074	ENSG00000180834
						ENSG00000132780	ENSG00000124104	ENSG00000180992
						ENSG00000132967	ENSG00000124120	ENSG00000181588
						ENSG00000133111	ENSG00000124172	ENSG00000181649
						ENSG00000133119	ENSG00000124198	ENSG00000181924
						ENSG00000133121	ENSG00000124422	ENSG00000181938
						ENSG00000133131	ENSG00000124496	ENSG00000181991
						ENSG00000133315	ENSG00000124549	ENSG00000182087
						ENSG00000133316	ENSG00000124795	ENSG00000182108
						ENSG00000133318	ENSG00000124802	ENSG00000182158
						ENSG00000133606	ENSG00000125249	ENSG00000182247
						ENSG00000133627	ENSG00000125398	ENSG00000182272
						ENSG00000133639	ENSG00000125651	ENSG00000182700
						ENSG00000133657	ENSG00000125652	ENSG00000182810
						ENSG00000133794	ENSG00000125691	ENSG00000182919
						ENSG00000133812	ENSG00000125962	ENSG00000183431
						ENSG00000134057	ENSG00000126247	ENSG00000183520
						ENSG00000134070	ENSG00000126267	ENSG00000183530
						ENSG00000134186	ENSG00000126391	ENSG00000183691
						ENSG00000134222	ENSG00000126432	ENSG00000183779
						ENSG00000134242	ENSG00000126458	ENSG00000183889
						ENSG00000134250	ENSG00000126562	ENSG00000184110
						ENSG00000134318	ENSG00000126773	ENSG00000185022
						ENSG00000134363	ENSG00000126858	ENSG00000185338
						ENSG00000134369	ENSG00000126860	ENSG00000185482
						ENSG00000134574	ENSG00000126934	ENSG00000185838
						ENSG00000134684	ENSG00000127804	ENSG00000186395
						ENSG00000134686	ENSG00000127837	ENSG00000186470
						ENSG00000134697	ENSG00000127922	ENSG00000186575
						ENSG00000134717	ENSG00000127946	ENSG00000187147
						ENSG00000134758	ENSG00000127980	ENSG00000187479
						ENSG00000134824	ENSG00000127995	ENSG00000187583
						ENSG00000135048	ENSG00000128000	ENSG00000187634
						ENSG00000135074	ENSG00000128039	ENSG00000187713
						ENSG00000135372	ENSG00000128185	ENSG00000188153
						ENSG00000135446	ENSG00000128191	ENSG00000188177
						ENSG00000135451	ENSG00000128245	ENSG00000188290
						ENSG00000135486	ENSG00000128335	ENSG00000188493
						ENSG00000135535	ENSG00000128513	ENSG00000188766
						ENSG00000135596	ENSG00000128609	ENSG00000196275
						ENSG00000135655	ENSG00000128789	ENSG00000196295
						ENSG00000135686	ENSG00000128872	ENSG00000196569
						ENSG00000135763	ENSG00000129055	ENSG00000196586
						ENSG00000135862	ENSG00000129128	ENSG00000196757
						ENSG00000135913	ENSG00000129235	ENSG00000196976
						ENSG00000135926	ENSG00000129292	ENSG00000197006
						ENSG00000135966	ENSG00000129317	ENSG00000197019
						ENSG00000136048	ENSG00000129535	ENSG00000197265
						ENSG00000136122	ENSG00000129636	ENSG00000197451
						ENSG00000136231	ENSG00000129657	ENSG00000197457
						ENSG00000136381	ENSG00000129810	ENSG00000197594
						ENSG00000136436	ENSG00000129925	ENSG00000197785
						ENSG00000136444	ENSG00000130024	ENSG00000197852
						ENSG00000136478	ENSG00000130159	ENSG00000197858
						ENSG00000136492	ENSG00000130202	ENSG00000197905
						ENSG00000136603	ENSG00000130203	ENSG00000198431
						ENSG00000136709	ENSG00000130312	ENSG00000198722
						ENSG00000136783	ENSG00000130338	ENSG00000198830
						ENSG00000136811	ENSG00000130669	ENSG00000198838
						ENSG00000136848	ENSG00000130733	ENSG00000198873
						ENSG00000136960	ENSG00000130827	ENSG00000203791
						ENSG00000136982	ENSG00000130940	ENSG00000203930
						ENSG00000136999	ENSG00000131016	ENSG00000204052
						ENSG00000137040	ENSG00000131051	ENSG00000204070
						ENSG00000137124	ENSG00000131127	ENSG00000204071
						ENSG00000137193	ENSG00000131263	ENSG00000204394
						ENSG00000137198	ENSG00000131373	ENSG00000204519
						ENSG00000137210	ENSG00000131446	ENSG00000204604
						ENSG00000137269	ENSG00000131748	ENSG00000205464
						ENSG00000137310	ENSG00000131788	ENSG00000213015
						ENSG00000137413	ENSG00000132000	ENSG00000213563
						ENSG00000137449	ENSG00000132155	ENSG00000213949
						ENSG00000137574	ENSG00000132300	ENSG00000214174
						ENSG00000137575	ENSG00000132305	ENSG00000215014
						ENSG00000137824	ENSG00000132432	ENSG00000215302
						ENSG00000137941	ENSG00000132466	ENSG00000218891
						ENSG00000137962	ENSG00000132530	ENSG00000221944
						ENSG00000138095	ENSG00000132581	ENSG00000223496
						ENSG00000138119	ENSG00000132669	ENSG00000224094
						ENSG00000138190	ENSG00000132749	ENSG00000224126
						ENSG00000138346	ENSG00000132825	ENSG00000224877
						ENSG00000138381	ENSG00000133030	ENSG00000225573
						ENSG00000138385	ENSG00000133107	ENSG00000226752
						ENSG00000138398	ENSG00000133226	ENSG00000228300
						ENSG00000138434	ENSG00000133275	ENSG00000228328
						ENSG00000138468	ENSG00000133624	ENSG00000229927
						ENSG00000138685	ENSG00000133641	ENSG00000230330
						ENSG00000138778	ENSG00000133739	ENSG00000231889
						ENSG00000138814	ENSG00000133789	ENSG00000232000
						ENSG00000138867	ENSG00000133805	ENSG00000233608
						ENSG00000139197	ENSG00000134013	ENSG00000233937
						ENSG00000139350	ENSG00000134030	ENSG00000235162
						ENSG00000139354	ENSG00000134077	ENSG00000235173
						ENSG00000139364	ENSG00000134265	ENSG00000235776
						ENSG00000139405	ENSG00000134419	ENSG00000237187
						ENSG00000139438	ENSG00000134444	ENSG00000237424
						ENSG00000139793	ENSG00000134490	ENSG00000238197
						ENSG00000139880	ENSG00000134569	ENSG00000239246
						ENSG00000139926	ENSG00000134775	ENSG00000239857
						ENSG00000140262	ENSG00000134779	ENSG00000241360
						ENSG00000140451	ENSG00000134802	ENSG00000241749
						ENSG00000140497	ENSG00000134825	ENSG00000243449
						ENSG00000140526	ENSG00000134882	ENSG00000244026
						ENSG00000140553	ENSG00000134884	ENSG00000244486
						ENSG00000140937	ENSG00000134909	ENSG00000244586
						ENSG00000140941	ENSG00000134986	ENSG00000245680
						ENSG00000141076	ENSG00000135046	ENSG00000246090
						ENSG00000141098	ENSG00000135108	ENSG00000247077
						ENSG00000141401	ENSG00000135316	ENSG00000249992
						ENSG00000141425	ENSG00000135336	ENSG00000250479
						ENSG00000141449	ENSG00000135476	ENSG00000251493
						ENSG00000141510	ENSG00000135503	ENSG00000253276
						ENSG00000141564	ENSG00000135506	ENSG00000253368
						ENSG00000141569	ENSG00000135679	ENSG00000254093
						ENSG00000141682	ENSG00000135835	ENSG00000255198
						ENSG00000141858	ENSG00000135899	ENSG00000256683
						ENSG00000141933	ENSG00000135900	ENSG00000256940
						ENSG00000141956	ENSG00000135916	ENSG00000257704
						ENSG00000141985	ENSG00000136111	ENSG00000258429
						ENSG00000142089	ENSG00000136146	ENSG00000260001
						ENSG00000142188	ENSG00000136213	ENSG00000260400
						ENSG00000142207	ENSG00000136261	ENSG00000260456
						ENSG00000142686	ENSG00000136536	ENSG00000261221
						ENSG00000142945	ENSG00000136631	ENSG00000261716
						ENSG00000143106	ENSG00000136636	ENSG00000262814
						ENSG00000143127	ENSG00000136715	ENSG00000263001
						ENSG00000143153	ENSG00000136758	ENSG00000265808
						ENSG00000143179	ENSG00000136810	ENSG00000267279
						ENSG00000143228	ENSG00000136830	ENSG00000268471
						ENSG00000143376	ENSG00000136877	ENSG00000269556
						ENSG00000143390	ENSG00000136930	ENSG00000270225
						ENSG00000143398	ENSG00000136940	ENSG00000271303
						ENSG00000143420	ENSG00000137135	ENSG00000272325
						ENSG00000143476	ENSG00000137203	ENSG00000272655
						ENSG00000143493	ENSG00000137312	ENSG00000272933
						ENSG00000143624	ENSG00000137338	ENSG00000274070
						ENSG00000143753	ENSG00000137343	ENSG00000275832
						ENSG00000143799	ENSG00000137478	ENSG00000276045
						ENSG00000143870	ENSG00000137502	ENSG00000277791
						ENSG00000143889	ENSG00000137601	ENSG00000277972
						ENSG00000144028	ENSG00000137693	ENSG00000278662
						ENSG00000144224	ENSG00000137710	ENSG00000278962
						ENSG00000144320	ENSG00000137760	ENSG00000279170
						ENSG00000144354	ENSG00000137770	ENSG00000283154
						ENSG00000144355	ENSG00000137801	ENSG00000288675
						ENSG00000144357	ENSG00000137807
						ENSG00000144468	ENSG00000137815
						ENSG00000144567	ENSG00000137819
						ENSG00000144645	ENSG00000137871
						ENSG00000144659	ENSG00000138080
						ENSG00000144711	ENSG00000138138
						ENSG00000144724	ENSG00000138160
						ENSG00000144824	ENSG00000138326
						ENSG00000145014	ENSG00000138347
						ENSG00000145050	ENSG00000138356
						ENSG00000145147	ENSG00000138375
						ENSG00000145332	ENSG00000138376
						ENSG00000145349	ENSG00000138386
						ENSG00000145390	ENSG00000138448
						ENSG00000145391	ENSG00000138459
						ENSG00000145414	ENSG00000138587
						ENSG00000145431	ENSG00000138593
						ENSG00000145545	ENSG00000138594
						ENSG00000145604	ENSG00000138600
						ENSG00000145685	ENSG00000138613
						ENSG00000145740	ENSG00000138698
						ENSG00000145781	ENSG00000138709
						ENSG00000145817	ENSG00000138757
						ENSG00000146143	ENSG00000138785
						ENSG00000146263	ENSG00000138794
						ENSG00000146281	ENSG00000138802
						ENSG00000146376	ENSG00000138835
						ENSG00000146433	ENSG00000139083
						ENSG00000146648	ENSG00000139116
						ENSG00000146674	ENSG00000139190
						ENSG00000146676	ENSG00000139218
						ENSG00000146802	ENSG00000139289
						ENSG00000146872	ENSG00000139323
						ENSG00000146963	ENSG00000139324
						ENSG00000147100	ENSG00000139410
						ENSG00000147274	ENSG00000139433
						ENSG00000147383	ENSG00000139618
						ENSG00000147403	ENSG00000139644
						ENSG00000147649	ENSG00000139668
						ENSG00000147799	ENSG00000139734
						ENSG00000147872	ENSG00000139746
						ENSG00000147883	ENSG00000139826
						ENSG00000147894	ENSG00000139921
						ENSG00000148154	ENSG00000140092
						ENSG00000148296	ENSG00000140264
						ENSG00000148334	ENSG00000140307
						ENSG00000148400	ENSG00000140386
						ENSG00000148411	ENSG00000140464
						ENSG00000148634	ENSG00000140521
						ENSG00000149054	ENSG00000140534
						ENSG00000149308	ENSG00000140545
						ENSG00000149313	ENSG00000140564
						ENSG00000149474	ENSG00000140983
						ENSG00000149554	ENSG00000141026
						ENSG00000149571	ENSG00000141027
						ENSG00000149636	ENSG00000141034
						ENSG00000149639	ENSG00000141295
						ENSG00000149679	ENSG00000141298
						ENSG00000149968	ENSG00000141570
						ENSG00000150403	ENSG00000141741
						ENSG00000150457	ENSG00000141756
						ENSG00000151414	ENSG00000141867
						ENSG00000151552	ENSG00000141959
						ENSG00000151572	ENSG00000142156
						ENSG00000151693	ENSG00000142166
						ENSG00000151726	ENSG00000142173
						ENSG00000151923	ENSG00000142186
						ENSG00000152102	ENSG00000142192
						ENSG00000152127	ENSG00000142534
						ENSG00000152137	ENSG00000142552
						ENSG00000152229	ENSG00000142676
						ENSG00000152240	ENSG00000142694
						ENSG00000152377	ENSG00000142731
						ENSG00000152402	ENSG00000142867
						ENSG00000152413	ENSG00000143013
						ENSG00000152518	ENSG00000143321
						ENSG00000152556	ENSG00000143344
						ENSG00000152558	ENSG00000143373
						ENSG00000152784	ENSG00000143387
						ENSG00000152795	ENSG00000143537
						ENSG00000152804	ENSG00000143614
						ENSG00000152818	ENSG00000143630
						ENSG00000152952	ENSG00000143669
						ENSG00000152990	ENSG00000143727
						ENSG00000153113	ENSG00000143947
						ENSG00000153187	ENSG00000143970
						ENSG00000153250	ENSG00000143971
						ENSG00000153317	ENSG00000143977
						ENSG00000153560	ENSG00000144228
						ENSG00000153786	ENSG00000144401
						ENSG00000153820	ENSG00000144455
						ENSG00000153823	ENSG00000144580
						ENSG00000153944	ENSG00000144827
						ENSG00000154040	ENSG00000145012
						ENSG00000154127	ENSG00000145016
						ENSG00000154144	ENSG00000145214
						ENSG00000154229	ENSG00000145241
						ENSG00000154237	ENSG00000145242
						ENSG00000154380	ENSG00000145386
						ENSG00000154678	ENSG00000145715
						ENSG00000154743	ENSG00000145860
						ENSG00000155111	ENSG00000146197
						ENSG00000155313	ENSG00000146243
						ENSG00000155330	ENSG00000146410
						ENSG00000155363	ENSG00000146587
						ENSG00000155368	ENSG00000146670
						ENSG00000155380	ENSG00000147439
						ENSG00000155660	ENSG00000147454
						ENSG00000155816	ENSG00000147457
						ENSG00000155970	ENSG00000147459
						ENSG00000156017	ENSG00000147526
						ENSG00000156103	ENSG00000147548
						ENSG00000156136	ENSG00000147604
						ENSG00000156170	ENSG00000147669
						ENSG00000156265	ENSG00000147789
						ENSG00000156471	ENSG00000147874
						ENSG00000156475	ENSG00000147889
						ENSG00000156802	ENSG00000148219
						ENSG00000157036	ENSG00000148300
						ENSG00000157106	ENSG00000148384
						ENSG00000157168	ENSG00000148671
						ENSG00000157212	ENSG00000148719
						ENSG00000157214	ENSG00000148773
						ENSG00000157227	ENSG00000148803
						ENSG00000157240	ENSG00000148848
						ENSG00000157350	ENSG00000148943
						ENSG00000157456	ENSG00000149084
						ENSG00000157483	ENSG00000149187
						ENSG00000157557	ENSG00000149231
						ENSG00000158402	ENSG00000149499
						ENSG00000158417	ENSG00000149503
						ENSG00000159131	ENSG00000149548
						ENSG00000159208	ENSG00000149792
						ENSG00000159259	ENSG00000149806
						ENSG00000159593	ENSG00000149923
						ENSG00000160014	ENSG00000150054
						ENSG00000160200	ENSG00000150093
						ENSG00000160285	ENSG00000150347
						ENSG00000160294	ENSG00000150455
						ENSG00000160299	ENSG00000150991
						ENSG00000160752	ENSG00000150995
						ENSG00000160813	ENSG00000151006
						ENSG00000160949	ENSG00000151151
						ENSG00000160953	ENSG00000151229
						ENSG00000161021	ENSG00000151239
						ENSG00000161203	ENSG00000151292
						ENSG00000161692	ENSG00000151327
						ENSG00000162062	ENSG00000151338
						ENSG00000162063	ENSG00000151353
						ENSG00000162073	ENSG00000151491
						ENSG00000162231	ENSG00000151725
						ENSG00000162413	ENSG00000151876
						ENSG00000162521	ENSG00000152082
						ENSG00000162545	ENSG00000152219
						ENSG00000162614	ENSG00000152234
						ENSG00000162636	ENSG00000152359
						ENSG00000162664	ENSG00000152465
						ENSG00000162745	ENSG00000152492
						ENSG00000162851	ENSG00000152495
						ENSG00000162980	ENSG00000152620
						ENSG00000163083	ENSG00000153071
						ENSG00000163093	ENSG00000153130
						ENSG00000163162	ENSG00000153294
						ENSG00000163171	ENSG00000153885
						ENSG00000163297	ENSG00000153904
						ENSG00000163320	ENSG00000153914
						ENSG00000163378	ENSG00000154059
						ENSG00000163428	ENSG00000154473
						ENSG00000163430	ENSG00000154511
						ENSG00000163453	ENSG00000154642
						ENSG00000163655	ENSG00000154723
						ENSG00000163719	ENSG00000154839
						ENSG00000163754	ENSG00000155158
						ENSG00000163918	ENSG00000155329
						ENSG00000163930	ENSG00000155545
						ENSG00000163938	ENSG00000155592
						ENSG00000163950	ENSG00000155876
						ENSG00000164023	ENSG00000155903
						ENSG00000164045	ENSG00000156273
						ENSG00000164104	ENSG00000156411
						ENSG00000164111	ENSG00000156482
						ENSG00000164163	ENSG00000156508
						ENSG00000164211	ENSG00000156603
						ENSG00000164291	ENSG00000156735
						ENSG00000164323	ENSG00000156853
						ENSG00000164329	ENSG00000156860
						ENSG00000164402	ENSG00000156869
						ENSG00000164403	ENSG00000156873
						ENSG00000164465	ENSG00000157077
						ENSG00000164466	ENSG00000157224
						ENSG00000164548	ENSG00000157613
						ENSG00000164576	ENSG00000157637
						ENSG00000164604	ENSG00000157693
						ENSG00000164611	ENSG00000157916
						ENSG00000164649	ENSG00000158125
						ENSG00000164733	ENSG00000158186
						ENSG00000164754	ENSG00000158286
						ENSG00000164761	ENSG00000158301
						ENSG00000164828	ENSG00000158373
						ENSG00000164944	ENSG00000158552
						ENSG00000165030	ENSG00000158604
						ENSG00000165046	ENSG00000158691
						ENSG00000165102	ENSG00000158711
						ENSG00000165119	ENSG00000158747
						ENSG00000165244	ENSG00000158773
						ENSG00000165264	ENSG00000158796
						ENSG00000165271	ENSG00000158941
						ENSG00000165494	ENSG00000158985
						ENSG00000165650	ENSG00000159069
						ENSG00000165724	ENSG00000159216
						ENSG00000165801	ENSG00000159231
						ENSG00000165868	ENSG00000159459
						ENSG00000165891	ENSG00000159479
						ENSG00000166073	ENSG00000159556
						ENSG00000166181	ENSG00000159579
						ENSG00000166197	ENSG00000159958
						ENSG00000166272	ENSG00000160058
						ENSG00000166394	ENSG00000160075
						ENSG00000166396	ENSG00000160298
						ENSG00000166446	ENSG00000160325
						ENSG00000166508	ENSG00000160551
						ENSG00000166598	ENSG00000160570
						ENSG00000166801	ENSG00000160741
						ENSG00000166833	ENSG00000160767
						ENSG00000166848	ENSG00000160886
						ENSG00000166851	ENSG00000160991
						ENSG00000166889	ENSG00000161011
						ENSG00000166922	ENSG00000161048
						ENSG00000166938	ENSG00000161509
						ENSG00000166949	ENSG00000161526
						ENSG00000167074	ENSG00000161547
						ENSG00000167258	ENSG00000161654
						ENSG00000167371	ENSG00000161671
						ENSG00000167460	ENSG00000161677
						ENSG00000167508	ENSG00000161888
						ENSG00000167513	ENSG00000161960
						ENSG00000167548	ENSG00000162004
						ENSG00000167601	ENSG00000162222
						ENSG00000167670	ENSG00000162337
						ENSG00000167747	ENSG00000162378
						ENSG00000167994	ENSG00000162402
						ENSG00000167996	ENSG00000162409
						ENSG00000168010	ENSG00000162591
						ENSG00000168096	ENSG00000162618
						ENSG00000168101	ENSG00000162631
						ENSG00000168116	ENSG00000162695
						ENSG00000168264	ENSG00000162702
						ENSG00000168268	ENSG00000162714
						ENSG00000168405	ENSG00000162889
						ENSG00000168496	ENSG00000162946
						ENSG00000168497	ENSG00000163026
						ENSG00000168591	ENSG00000163029
						ENSG00000168679	ENSG00000163104
						ENSG00000168685	ENSG00000163110
						ENSG00000168806	ENSG00000163281
						ENSG00000168906	ENSG00000163319
						ENSG00000168952	ENSG00000163374
						ENSG00000169045	ENSG00000163479
						ENSG00000169188	ENSG00000163565
						ENSG00000169375	ENSG00000163605
						ENSG00000169504	ENSG00000163635
						ENSG00000169507	ENSG00000163682
						ENSG00000169679	ENSG00000163701
						ENSG00000169684	ENSG00000163755
						ENSG00000169710	ENSG00000163795
						ENSG00000169756	ENSG00000163807
						ENSG00000169760	ENSG00000163808
						ENSG00000169813	ENSG00000163848
						ENSG00000169908	ENSG00000163867
						ENSG00000169991	ENSG00000163870
						ENSG00000170037	ENSG00000163874
						ENSG00000170085	ENSG00000163875
						ENSG00000170113	ENSG00000163913
						ENSG00000170144	ENSG00000163931
						ENSG00000170214	ENSG00000163946
						ENSG00000170385	ENSG00000163956
						ENSG00000170396	ENSG00000164024
						ENSG00000170485	ENSG00000164031
						ENSG00000170540	ENSG00000164081
						ENSG00000170629	ENSG00000164114
						ENSG00000170653	ENSG00000164180
						ENSG00000170854	ENSG00000164220
						ENSG00000171016	ENSG00000164244
						ENSG00000171161	ENSG00000164327
						ENSG00000171223	ENSG00000164631
						ENSG00000171320	ENSG00000164743
						ENSG00000171451	ENSG00000164919
						ENSG00000171456	ENSG00000164924
						ENSG00000171552	ENSG00000164930
						ENSG00000171681	ENSG00000164951
						ENSG00000171723	ENSG00000164985
						ENSG00000171914	ENSG00000164989
						ENSG00000172059	ENSG00000165029
						ENSG00000172061	ENSG00000165156
						ENSG00000172081	ENSG00000165169
						ENSG00000172159	ENSG00000165304
						ENSG00000172432	ENSG00000165355
						ENSG00000172716	ENSG00000165392
						ENSG00000172890	ENSG00000165417
						ENSG00000172893	ENSG00000165449
						ENSG00000172939	ENSG00000165476
						ENSG00000173011	ENSG00000165502
						ENSG00000173064	ENSG00000165525
						ENSG00000173114	ENSG00000165533
						ENSG00000173145	ENSG00000165572
						ENSG00000173153	ENSG00000165630
						ENSG00000173209	ENSG00000165792
						ENSG00000173281	ENSG00000165806
						ENSG00000173391	ENSG00000165898
						ENSG00000173456	ENSG00000165943
						ENSG00000173473	ENSG00000165997
						ENSG00000173482	ENSG00000166004
						ENSG00000173530	ENSG00000166025
						ENSG00000173559	ENSG00000166033
						ENSG00000173599	ENSG00000166037
						ENSG00000173638	ENSG00000166140
						ENSG00000173812	ENSG00000166147
						ENSG00000173821	ENSG00000166200
						ENSG00000173848	ENSG00000166225
						ENSG00000173894	ENSG00000166263
						ENSG00000173950	ENSG00000166266
						ENSG00000174276	ENSG00000166377
						ENSG00000174371	ENSG00000166482
						ENSG00000174437	ENSG00000166483
						ENSG00000174738	ENSG00000166579
						ENSG00000174780	ENSG00000166710
						ENSG00000174945	ENSG00000166803
						ENSG00000175048	ENSG00000166845
						ENSG00000175130	ENSG00000166881
						ENSG00000175137	ENSG00000166908
						ENSG00000175216	ENSG00000166913
						ENSG00000175283	ENSG00000166923
						ENSG00000175305	ENSG00000166987
						ENSG00000175455	ENSG00000167065
						ENSG00000175643	ENSG00000167123
						ENSG00000175745	ENSG00000167182
						ENSG00000176171	ENSG00000167291
						ENSG00000176208	ENSG00000167302
						ENSG00000176788	ENSG00000167384
						ENSG00000176946	ENSG00000167393
						ENSG00000177030	ENSG00000167522
						ENSG00000177225	ENSG00000167524
						ENSG00000177303	ENSG00000167550
						ENSG00000177383	ENSG00000167595
						ENSG00000177425	ENSG00000167645
						ENSG00000177606	ENSG00000167716
						ENSG00000177613	ENSG00000167770
						ENSG00000177707	ENSG00000167772
						ENSG00000177917	ENSG00000167863
						ENSG00000178031	ENSG00000167986
						ENSG00000178033	ENSG00000168028
						ENSG00000178035	ENSG00000168036
						ENSG00000178409	ENSG00000168067
						ENSG00000178878	ENSG00000168175
						ENSG00000178966	ENSG00000168214
						ENSG00000178974	ENSG00000168282
						ENSG00000179094	ENSG00000168286
						ENSG00000179218	ENSG00000168303
						ENSG00000179335	ENSG00000168397
						ENSG00000179833	ENSG00000168476
						ENSG00000179958	ENSG00000168487
						ENSG00000180011	ENSG00000168488
						ENSG00000180573	ENSG00000168502
						ENSG00000180611	ENSG00000168538
						ENSG00000180914	ENSG00000168566
						ENSG00000180957	ENSG00000168758
						ENSG00000181104	ENSG00000168883
						ENSG00000181381	ENSG00000168884
						ENSG00000181418	ENSG00000168936
						ENSG00000181744	ENSG00000168970
						ENSG00000181904	ENSG00000169018
						ENSG00000182118	ENSG00000169019
						ENSG00000182173	ENSG00000169062
						ENSG00000182180	ENSG00000169083
						ENSG00000182197	ENSG00000169100
						ENSG00000182492	ENSG00000169193
						ENSG00000182541	ENSG00000169217
						ENSG00000182575	ENSG00000169223
						ENSG00000182612	ENSG00000169359
						ENSG00000182749	ENSG00000169607
						ENSG00000182831	ENSG00000169750
						ENSG00000182901	ENSG00000169884
						ENSG00000182916	ENSG00000169895
						ENSG00000182944	ENSG00000169957
						ENSG00000183020	ENSG00000169967
						ENSG00000183087	ENSG00000170242
						ENSG00000183098	ENSG00000170265
						ENSG00000183255	ENSG00000170310
						ENSG00000183688	ENSG00000170315
						ENSG00000183722	ENSG00000170448
						ENSG00000183723	ENSG00000170522
						ENSG00000183741	ENSG00000170558
						ENSG00000183856	ENSG00000170734
						ENSG00000183955	ENSG00000170802
						ENSG00000184007	ENSG00000170860
						ENSG00000184014	ENSG00000170889
						ENSG00000184083	ENSG00000171055
						ENSG00000184178	ENSG00000171105
						ENSG00000184436	ENSG00000171130
						ENSG00000184584	ENSG00000171135
						ENSG00000184743	ENSG00000171159
						ENSG00000184897	ENSG00000171163
						ENSG00000184992	ENSG00000171222
						ENSG00000185070	ENSG00000171302
						ENSG00000185085	ENSG00000171443
						ENSG00000185115	ENSG00000171467
						ENSG00000185222	ENSG00000171604
						ENSG00000185361	ENSG00000171729
						ENSG00000185432	ENSG00000171757
						ENSG00000185504	ENSG00000171792
						ENSG00000185532	ENSG00000171813
						ENSG00000185619	ENSG00000171858
						ENSG00000185697	ENSG00000171861
						ENSG00000185813	ENSG00000171862
						ENSG00000185862	ENSG00000171940
						ENSG00000185875	ENSG00000171943
						ENSG00000185885	ENSG00000172057
						ENSG00000185900	ENSG00000172197
						ENSG00000185920	ENSG00000172262
						ENSG00000185989	ENSG00000172269
						ENSG00000186001	ENSG00000172354
						ENSG00000186283	ENSG00000172380
						ENSG00000186376	ENSG00000172428
						ENSG00000186480	ENSG00000172465
						ENSG00000186767	ENSG00000172732
						ENSG00000187109	ENSG00000172766
						ENSG00000187123	ENSG00000172775
						ENSG00000187189	ENSG00000172780
						ENSG00000187391	ENSG00000172824
						ENSG00000187720	ENSG00000172840
						ENSG00000188042	ENSG00000172845
						ENSG00000188342	ENSG00000172889
						ENSG00000188522	ENSG00000172985
						ENSG00000188529	ENSG00000173039
						ENSG00000188636	ENSG00000173065
						ENSG00000188641	ENSG00000173207
						ENSG00000188807	ENSG00000173264
						ENSG00000189046	ENSG00000173272
						ENSG00000189057	ENSG00000173276
						ENSG00000189060	ENSG00000173295
						ENSG00000189223	ENSG00000173327
						ENSG00000189266	ENSG00000173442
						ENSG00000189308	ENSG00000173511
						ENSG00000189320	ENSG00000173542
						ENSG00000189403	ENSG00000173545
						ENSG00000196072	ENSG00000173614
						ENSG00000196372	ENSG00000173727
						ENSG00000196460	ENSG00000173744
						ENSG00000196504	ENSG00000173852
						ENSG00000196507	ENSG00000173889
						ENSG00000196517	ENSG00000173915
						ENSG00000196584	ENSG00000174013
						ENSG00000196611	ENSG00000174080
						ENSG00000196652	ENSG00000174106
						ENSG00000196700	ENSG00000174132
						ENSG00000196776	ENSG00000174165
						ENSG00000196814	ENSG00000174373
						ENSG00000196961	ENSG00000174695
						ENSG00000197111	ENSG00000174718
						ENSG00000197119	ENSG00000174744
						ENSG00000197122	ENSG00000174839
						ENSG00000197142	ENSG00000174886
						ENSG00000197182	ENSG00000174903
						ENSG00000197208	ENSG00000174917
						ENSG00000197321	ENSG00000174938
						ENSG00000197442	ENSG00000175061
						ENSG00000197712	ENSG00000175115
						ENSG00000197771	ENSG00000175203
						ENSG00000197885	ENSG00000175322
						ENSG00000197948	ENSG00000175390
						ENSG00000197969	ENSG00000175548
						ENSG00000197982	ENSG00000175567
						ENSG00000198000	ENSG00000175711
						ENSG00000198053	ENSG00000175826
						ENSG00000198056	ENSG00000175866
						ENSG00000198168	ENSG00000175893
						ENSG00000198176	ENSG00000176055
						ENSG00000198498	ENSG00000176108
						ENSG00000198554	ENSG00000176209
						ENSG00000198682	ENSG00000176225
						ENSG00000198690	ENSG00000176444
						ENSG00000198824	ENSG00000176731
						ENSG00000198860	ENSG00000176783
						ENSG00000198890	ENSG00000176834
						ENSG00000198901	ENSG00000176907
						ENSG00000198910	ENSG00000176953
						ENSG00000198911	ENSG00000177034
						ENSG00000198919	ENSG00000177054
						ENSG00000198959	ENSG00000177058
						ENSG00000198964	ENSG00000177096
						ENSG00000203668	ENSG00000177200
						ENSG00000203993	ENSG00000177239
						ENSG00000204590	ENSG00000177409
						ENSG00000204767	ENSG00000177426
						ENSG00000205138	ENSG00000177464
						ENSG00000205181	ENSG00000177548
						ENSG00000205560	ENSG00000177683
						ENSG00000205581	ENSG00000177830
						ENSG00000205683	ENSG00000177853
						ENSG00000206538	ENSG00000177868
						ENSG00000212719	ENSG00000177932
						ENSG00000213047	ENSG00000177943
						ENSG00000213160	ENSG00000177951
						ENSG00000213186	ENSG00000178053
						ENSG00000213190	ENSG00000178149
						ENSG00000213347	ENSG00000178202
						ENSG00000213390	ENSG00000178234
						ENSG00000213445	ENSG00000178397
						ENSG00000213722	ENSG00000178425
						ENSG00000213967	ENSG00000178531
						ENSG00000214022	ENSG00000178567
						ENSG00000214078	ENSG00000178607
						ENSG00000214357	ENSG00000178695
						ENSG00000214425	ENSG00000178919
						ENSG00000214548	ENSG00000178980
						ENSG00000214717	ENSG00000178999
						ENSG00000214753	ENSG00000179632
						ENSG00000214765	ENSG00000179820
						ENSG00000214944	ENSG00000179841
						ENSG00000215252	ENSG00000179859
						ENSG00000221852	ENSG00000179886
						ENSG00000221968	ENSG00000179912
						ENSG00000221978	ENSG00000179922
						ENSG00000222041	ENSG00000180304
						ENSG00000223403	ENSG00000180488
						ENSG00000223768	ENSG00000180626
						ENSG00000225663	ENSG00000180776
						ENSG00000225733	ENSG00000180879
						ENSG00000226950	ENSG00000181220
						ENSG00000232815	ENSG00000181396
						ENSG00000234456	ENSG00000181404
						ENSG00000234616	ENSG00000181450
						ENSG00000242498	ENSG00000181481
						ENSG00000246067	ENSG00000181826
						ENSG00000247828	ENSG00000181830
						ENSG00000248698	ENSG00000181873
						ENSG00000249471	ENSG00000182004
						ENSG00000250251	ENSG00000182095
						ENSG00000250305	ENSG00000182220
						ENSG00000251562	ENSG00000182484
						ENSG00000253304	ENSG00000182606
						ENSG00000254004	ENSG00000182621
						ENSG00000256537	ENSG00000182628
						ENSG00000257923	ENSG00000182871
						ENSG00000259956	ENSG00000182899
						ENSG00000261888	ENSG00000182957
						ENSG00000264112	ENSG00000182986
						ENSG00000266028	ENSG00000183049
						ENSG00000266338	ENSG00000183291
						ENSG00000267100	ENSG00000183458
						ENSG00000270170	ENSG00000183506
						ENSG00000270647	ENSG00000183628
						ENSG00000272695	ENSG00000183665
						ENSG00000272994	ENSG00000183671
						ENSG00000273270	ENSG00000183726
						ENSG00000273888	ENSG00000183765
						ENSG00000274523	ENSG00000183850
						ENSG00000275074	ENSG00000183963
						ENSG00000275835	ENSG00000184163
						ENSG00000276043	ENSG00000184281
						ENSG00000276550	ENSG00000184304
						ENSG00000276953	ENSG00000184307
						ENSG00000277161	ENSG00000184349
						ENSG00000278259	ENSG00000184661
						ENSG00000278540	ENSG00000184900
						ENSG00000280206	ENSG00000184983
						ENSG00000281490	ENSG00000185043
						ENSG00000285967	ENSG00000185122
						ENSG00000288884	ENSG00000185129
						ENSG00000289047	ENSG00000185219
						ENSG00000289234	ENSG00000185246
						ENSG00000289586	ENSG00000185261
							ENSG00000185262
							ENSG00000185344
							ENSG00000185379
							ENSG00000185591
							ENSG00000185624
							ENSG00000185627
							ENSG00000185684
							ENSG00000185730
							ENSG00000185800
							ENSG00000185896
							ENSG00000186017
							ENSG00000186106
							ENSG00000186166
							ENSG00000186185
							ENSG00000186468
							ENSG00000186660
							ENSG00000187051
							ENSG00000187210
							ENSG00000187231
							ENSG00000187240
							ENSG00000187257
							ENSG00000187325
							ENSG00000187531
							ENSG00000187605
							ENSG00000187735
							ENSG00000188021
							ENSG00000188070
							ENSG00000188186
							ENSG00000188211
							ENSG00000188647
							ENSG00000188735
							ENSG00000188811
							ENSG00000188986
							ENSG00000188994
							ENSG00000189001
							ENSG00000189043
							ENSG00000189058
							ENSG00000189077
							ENSG00000189079
							ENSG00000189114
							ENSG00000189164
							ENSG00000189319
							ENSG00000189369
							ENSG00000196123
							ENSG00000196187
							ENSG00000196199
							ENSG00000196305
							ENSG00000196312
							ENSG00000196313
							ENSG00000196352
							ENSG00000196440
							ENSG00000196458
							ENSG00000196470
							ENSG00000196597
							ENSG00000196628
							ENSG00000196670
							ENSG00000196689
							ENSG00000196693
							ENSG00000196792
							ENSG00000196865
							ENSG00000196922
							ENSG00000196954
							ENSG00000197044
							ENSG00000197050
							ENSG00000197102
							ENSG00000197106
							ENSG00000197147
							ENSG00000197256
							ENSG00000197275
							ENSG00000197323
							ENSG00000197548
							ENSG00000197713
							ENSG00000197724
							ENSG00000197756
							ENSG00000197774
							ENSG00000197860
							ENSG00000197879
							ENSG00000197903
							ENSG00000197912
							ENSG00000197930
							ENSG00000197965
							ENSG00000198015
							ENSG00000198018
							ENSG00000198026
							ENSG00000198040
							ENSG00000198087
							ENSG00000198089
							ENSG00000198105
							ENSG00000198162
							ENSG00000198252
							ENSG00000198258
							ENSG00000198276
							ENSG00000198331
							ENSG00000198440
							ENSG00000198467
							ENSG00000198563
							ENSG00000198598
							ENSG00000198625
							ENSG00000198642
							ENSG00000198695
							ENSG00000198707
							ENSG00000198712
							ENSG00000198718
							ENSG00000198727
							ENSG00000198752
							ENSG00000198763
							ENSG00000198786
							ENSG00000198791
							ENSG00000198804
							ENSG00000198840
							ENSG00000198858
							ENSG00000198862
							ENSG00000198886
							ENSG00000198888
							ENSG00000198898
							ENSG00000198899
							ENSG00000198918
							ENSG00000198924
							ENSG00000198925
							ENSG00000198934
							ENSG00000198938
							ENSG00000198945
							ENSG00000203326
							ENSG00000203485
							ENSG00000203761
							ENSG00000203805
							ENSG00000203875
							ENSG00000203965
							ENSG00000204120
							ENSG00000204138
							ENSG00000204209
							ENSG00000204256
							ENSG00000204291
							ENSG00000204371
							ENSG00000204389
							ENSG00000204410
							ENSG00000204435
							ENSG00000204438
							ENSG00000204516
							ENSG00000204569
							ENSG00000204628
							ENSG00000204681
							ENSG00000204923
							ENSG00000204941
							ENSG00000204991
							ENSG00000205060
							ENSG00000205208
							ENSG00000205213
							ENSG00000205250
							ENSG00000205423
							ENSG00000205476
							ENSG00000206337
							ENSG00000206344
							ENSG00000206417
							ENSG00000206503
							ENSG00000206535
							ENSG00000212907
							ENSG00000213281
							ENSG00000213523
							ENSG00000213574
							ENSG00000213614
							ENSG00000213741
							ENSG00000213859
							ENSG00000213903
							ENSG00000213906
							ENSG00000213928
							ENSG00000214367
							ENSG00000214575
							ENSG00000214826
							ENSG00000215012
							ENSG00000215193
							ENSG00000218739
							ENSG00000221890
							ENSG00000222014
							ENSG00000223705
							ENSG00000223959
							ENSG00000223960
							ENSG00000223969
							ENSG00000224578
							ENSG00000225200
							ENSG00000225614
							ENSG00000225630
							ENSG00000225828
							ENSG00000225973
							ENSG00000228253
							ENSG00000228649
							ENSG00000229320
							ENSG00000229344
							ENSG00000230337
							ENSG00000230734
							ENSG00000230989
							ENSG00000231721
							ENSG00000233016
							ENSG00000233223
							ENSG00000233527
							ENSG00000234883
							ENSG00000236287
							ENSG00000236841
							ENSG00000237172
							ENSG00000237550
							ENSG00000237649
							ENSG00000237973
							ENSG00000237989
							ENSG00000239305
							ENSG00000240184
							ENSG00000240303
							ENSG00000240370
							ENSG00000240445
							ENSG00000241404
							ENSG00000241685
							ENSG00000242372
							ENSG00000242516
							ENSG00000243317
							ENSG00000243364
							ENSG00000243667
							ENSG00000243679
							ENSG00000243749
							ENSG00000244005
							ENSG00000245205
							ENSG00000245571
							ENSG00000247556
							ENSG00000247572
							ENSG00000247596
							ENSG00000247746
							ENSG00000248019
							ENSG00000248527
							ENSG00000248593
							ENSG00000250067
							ENSG00000250144
							ENSG00000250746
							ENSG00000251442
							ENSG00000253187
							ENSG00000253738
							ENSG00000254470
							ENSG00000254535
							ENSG00000254759
							ENSG00000255737
							ENSG00000256628
							ENSG00000257027
							ENSG00000257167
							ENSG00000257698
							ENSG00000258728
							ENSG00000259419
							ENSG00000259523
							ENSG00000260005
							ENSG00000260032
							ENSG00000260121
							ENSG00000260285
							ENSG00000260565
							ENSG00000260578
							ENSG00000260604
							ENSG00000260853
							ENSG00000260877
							ENSG00000261490
							ENSG00000261556
							ENSG00000261786
							ENSG00000262074
							ENSG00000263465
							ENSG00000264522
							ENSG00000264538
							ENSG00000265491
							ENSG00000265688
							ENSG00000265972
							ENSG00000266962
							ENSG00000267080
							ENSG00000267325
							ENSG00000267374
							ENSG00000267519
							ENSG00000267523
							ENSG00000269713
							ENSG00000269837
							ENSG00000269934
							ENSG00000270194
							ENSG00000271601
							ENSG00000272168
							ENSG00000272333
							ENSG00000272447
							ENSG00000272556
							ENSG00000272734
							ENSG00000272853
							ENSG00000272870
							ENSG00000272886
							ENSG00000273136
							ENSG00000273142
							ENSG00000273213
							ENSG00000273599
							ENSG00000273899
							ENSG00000274272
							ENSG00000274349
							ENSG00000275052
							ENSG00000275183
							ENSG00000275322
							ENSG00000276570
							ENSG00000277476
							ENSG00000278053
							ENSG00000278535
							ENSG00000278709
							ENSG00000279196
							ENSG00000279457
							ENSG00000280128
							ENSG00000280435
							ENSG00000282164
							ENSG00000282826
							ENSG00000284946
							ENSG00000285589
							ENSG00000286219
							ENSG00000286379
							ENSG00000286388
							ENSG00000288685
							ENSG00000289194

## Sheet: All w Amplitude Decrease
STRINGoutput_All genes with amplitude decreased (q < 0.05)
#category	term ID	term description	false discovery rate	observed gene count	background gene count	matching proteins in your network (labels)	matching proteins in your network (IDs)
GO Process	GO:0006119	Oxidative phosphorylation	3.8e-10	10	118	MT-CO1,MT-CYB,MT-ATP6,MT-ND6,MT-ND5,MT-CO2,MT-ND4,MT-CO3,MT-ND2,MT-ATP8	9606.ENSP00000354499,9606.ENSP00000354554,9606.ENSP00000354632,9606.ENSP00000354665,9606.ENSP00000354813,9606.ENSP00000354876,9606.ENSP00000354961,9606.ENSP00000354982,9606.ENSP00000355046,9606.ENSP00000355265
GO Process	GO:0042775	Mitochondrial atp synthesis coupled electron transport	3.37e-08	8	87	MT-CO1,MT-CYB,MT-ND6,MT-ND5,MT-CO2,MT-ND4,MT-CO3,MT-ND2	9606.ENSP00000354499,9606.ENSP00000354554,9606.ENSP00000354665,9606.ENSP00000354813,9606.ENSP00000354876,9606.ENSP00000354961,9606.ENSP00000354982,9606.ENSP00000355046
GO Process	GO:1902600	Proton transmembrane transport	1.01e-06	8	150	MT-CO1,MT-CYB,MT-ATP6,MT-ND5,MT-CO2,MT-ND4,MT-CO3,MT-ATP8	9606.ENSP00000354499,9606.ENSP00000354554,9606.ENSP00000354632,9606.ENSP00000354813,9606.ENSP00000354876,9606.ENSP00000354961,9606.ENSP00000354982,9606.ENSP00000355265
GO Process	GO:0015990	Electron transport coupled proton transport	2.16e-06	4	5	MT-CO1,MT-CYB,MT-ND5,MT-ND4	9606.ENSP00000354499,9606.ENSP00000354554,9606.ENSP00000354813,9606.ENSP00000354961
GO Process	GO:0015672	Monovalent inorganic cation transport	0.00011	9	441	MT-CO1,MT-CYB,MT-ATP6,MT-ND5,MT-CO2,MT-ND4,MT-CO3,MT-ATP8,SLC38A10	9606.ENSP00000354499,9606.ENSP00000354554,9606.ENSP00000354632,9606.ENSP00000354813,9606.ENSP00000354876,9606.ENSP00000354961,9606.ENSP00000354982,9606.ENSP00000355265,9606.ENSP00000363891
GO Process	GO:0016310	Phosphorylation	0.0003	13	1275	ADCK2,MT-CO1,MT-CYB,MT-ATP6,MT-ND6,MT-ND5,MT-CO2,MT-ND4,MT-CO3,MT-ND2,MT-ATP8,MAPKAPK2,MAP3K2	9606.ENSP00000072869,9606.ENSP00000354499,9606.ENSP00000354554,9606.ENSP00000354632,9606.ENSP00000354665,9606.ENSP00000354813,9606.ENSP00000354876,9606.ENSP00000354961,9606.ENSP00000354982,9606.ENSP00000355046,9606.ENSP00000355265,9606.ENSP00000356070,9606.ENSP00000387246
GO Process	GO:0006120	Mitochondrial electron transport, nadh to ubiquinone	0.0025	4	49	MT-ND6,MT-ND5,MT-ND4,MT-ND2	9606.ENSP00000354665,9606.ENSP00000354813,9606.ENSP00000354961,9606.ENSP00000355046
GO Process	GO:0032981	Mitochondrial respiratory chain complex i assembly	0.0072	4	66	MT-ND6,MT-ND5,MT-ND4,MT-ND2	9606.ENSP00000354665,9606.ENSP00000354813,9606.ENSP00000354961,9606.ENSP00000355046
GO Process	GO:0006123	Mitochondrial electron transport, cytochrome c to oxygen	0.0076	3	20	MT-CO1,MT-CO2,MT-CO3	9606.ENSP00000354499,9606.ENSP00000354876,9606.ENSP00000354982
GO Process	GO:0034220	Ion transmembrane transport	0.0086	10	1010	SLC16A7,MT-CO1,MT-CYB,MT-ATP6,MT-ND5,MT-CO2,MT-ND4,MT-CO3,MT-ATP8,SLC38A10	9606.ENSP00000261187,9606.ENSP00000354499,9606.ENSP00000354554,9606.ENSP00000354632,9606.ENSP00000354813,9606.ENSP00000354876,9606.ENSP00000354961,9606.ENSP00000354982,9606.ENSP00000355265,9606.ENSP00000363891
GO Process	GO:0006793	Phosphorus metabolic process	0.0109	14	2134	ADCK2,MT-CO1,MT-CYB,MT-ATP6,MT-ND6,MT-ND5,MT-CO2,MT-ND4,MT-CO3,MT-ND2,MT-ATP8,MAPKAPK2,MAP3K2,MGAT1	9606.ENSP00000072869,9606.ENSP00000354499,9606.ENSP00000354554,9606.ENSP00000354632,9606.ENSP00000354665,9606.ENSP00000354813,9606.ENSP00000354876,9606.ENSP00000354961,9606.ENSP00000354982,9606.ENSP00000355046,9606.ENSP00000355265,9606.ENSP00000356070,9606.ENSP00000387246,9606.ENSP00000404718
GO Process	GO:0009060	Aerobic respiration	0.0109	4	79	MT-CO1,MT-CO2,MT-ND4,MT-CO3	9606.ENSP00000354499,9606.ENSP00000354876,9606.ENSP00000354961,9606.ENSP00000354982
GO Process	GO:0006950	Response to stress	0.0352	17	3485	HMGB2,REST,MT-CO1,MT-CYB,MT-ATP6,MT-ND6,MT-ND5,MT-CO2,MT-ND4,RPL39,MAPKAPK2,UFL1,POLH,LTB4R,MAP3K2,FAM111A,VIM	9606.ENSP00000296503,9606.ENSP00000311816,9606.ENSP00000354499,9606.ENSP00000354554,9606.ENSP00000354632,9606.ENSP00000354665,9606.ENSP00000354813,9606.ENSP00000354876,9606.ENSP00000354961,9606.ENSP00000355315,9606.ENSP00000356070,9606.ENSP00000358283,9606.ENSP00000361310,9606.ENSP00000380008,9606.ENSP00000387246,9606.ENSP00000434435,9606.ENSP00000446007
GO Function	GO:0004129	Cytochrome-c oxidase activity	0.0075	3	22	MT-CO1,MT-CO2,MT-CO3	9606.ENSP00000354499,9606.ENSP00000354876,9606.ENSP00000354982
GO Function	GO:0008137	NADH dehydrogenase (ubiquinone) activity	0.0075	4	46	MT-ND6,MT-ND5,MT-ND4,MT-ND2	9606.ENSP00000354665,9606.ENSP00000354813,9606.ENSP00000354961,9606.ENSP00000355046
GO Function	GO:0015078	Proton transmembrane transporter activity	0.0075	5	125	MT-CO1,MT-ATP6,MT-CO2,MT-CO3,MT-ATP8	9606.ENSP00000354499,9606.ENSP00000354632,9606.ENSP00000354876,9606.ENSP00000354982,9606.ENSP00000355265
GO Function	GO:0009055	Electron transfer activity	0.0156	4	103	MT-CO1,MT-CYB,MT-CO2,MT-CO3	9606.ENSP00000354499,9606.ENSP00000354554,9606.ENSP00000354876,9606.ENSP00000354982
GO Function	GO:0016491	Oxidoreductase activity	0.0161	8	726	MT-CO1,MT-CYB,MT-ND6,MT-ND5,MT-CO2,MT-ND4,MT-CO3,MT-ND2	9606.ENSP00000354499,9606.ENSP00000354554,9606.ENSP00000354665,9606.ENSP00000354813,9606.ENSP00000354876,9606.ENSP00000354961,9606.ENSP00000354982,9606.ENSP00000355046
GO Component	GO:0070469	Respirasome	2.55e-08	8	95	MT-CO1,MT-CYB,MT-ND6,MT-ND5,MT-CO2,MT-ND4,MT-CO3,MT-ND2	9606.ENSP00000354499,9606.ENSP00000354554,9606.ENSP00000354665,9606.ENSP00000354813,9606.ENSP00000354876,9606.ENSP00000354961,9606.ENSP00000354982,9606.ENSP00000355046
GO Component	GO:0098800	Inner mitochondrial membrane protein complex	1.44e-07	8	131	MT-CO1,MT-CYB,MT-ATP6,MT-ND5,MT-ND4,MT-ND2,MT-ATP8,C14orf2	9606.ENSP00000354499,9606.ENSP00000354554,9606.ENSP00000354632,9606.ENSP00000354813,9606.ENSP00000354961,9606.ENSP00000355046,9606.ENSP00000355265,9606.ENSP00000401770
GO Component	GO:0098803	Respiratory chain complex	1.44e-07	7	80	MT-CO1,MT-CYB,MT-ND5,MT-CO2,MT-ND4,MT-CO3,MT-ND2	9606.ENSP00000354499,9606.ENSP00000354554,9606.ENSP00000354813,9606.ENSP00000354876,9606.ENSP00000354961,9606.ENSP00000354982,9606.ENSP00000355046
GO Component	GO:0005743	Mitochondrial inner membrane	4.39e-07	11	480	MT-CO1,MT-CYB,MT-ATP6,MT-ND6,MT-ND5,MT-CO2,MT-ND4,MT-CO3,MT-ND2,MT-ATP8,C14orf2	9606.ENSP00000354499,9606.ENSP00000354554,9606.ENSP00000354632,9606.ENSP00000354665,9606.ENSP00000354813,9606.ENSP00000354876,9606.ENSP00000354961,9606.ENSP00000354982,9606.ENSP00000355046,9606.ENSP00000355265,9606.ENSP00000401770
GO Component	GO:0031967	Organelle envelope	3.44e-05	13	1213	MT-CO1,MT-CYB,MT-ATP6,MT-ND6,MT-ND5,MT-CO2,MT-ND4,MT-CO3,MT-ND2,MT-ATP8,C14orf2,CNEP1R1,ERBB2IP	9606.ENSP00000354499,9606.ENSP00000354554,9606.ENSP00000354632,9606.ENSP00000354665,9606.ENSP00000354813,9606.ENSP00000354876,9606.ENSP00000354961,9606.ENSP00000354982,9606.ENSP00000355046,9606.ENSP00000355265,9606.ENSP00000401770,9606.ENSP00000405635,9606.ENSP00000426632
GO Component	GO:0070069	Cytochrome complex	9.36e-05	4	32	MT-CO1,MT-CYB,MT-CO2,MT-CO3	9606.ENSP00000354499,9606.ENSP00000354554,9606.ENSP00000354876,9606.ENSP00000354982
GO Component	GO:0005746	Mitochondrial respirasome	9.48e-05	5	84	MT-CO1,MT-CYB,MT-ND5,MT-ND4,MT-ND2	9606.ENSP00000354499,9606.ENSP00000354554,9606.ENSP00000354813,9606.ENSP00000354961,9606.ENSP00000355046
GO Component	GO:0098796	Membrane protein complex	9.93e-05	12	1141	MT-CO1,MT-CYB,MT-ATP6,MT-ND5,MT-CO2,MT-ND4,MT-CO3,MT-ND2,MT-ATP8,EMILIN1,C14orf2,CNEP1R1	9606.ENSP00000354499,9606.ENSP00000354554,9606.ENSP00000354632,9606.ENSP00000354813,9606.ENSP00000354876,9606.ENSP00000354961,9606.ENSP00000354982,9606.ENSP00000355046,9606.ENSP00000355265,9606.ENSP00000369677,9606.ENSP00000401770,9606.ENSP00000405635
GO Component	GO:1990204	Oxidoreductase complex	0.00025	5	107	MT-CO1,MT-CYB,MT-ND5,MT-ND4,MT-ND2	9606.ENSP00000354499,9606.ENSP00000354554,9606.ENSP00000354813,9606.ENSP00000354961,9606.ENSP00000355046
GO Component	GO:0045277	Respiratory chain complex iv	0.0011	3	19	MT-CO1,MT-CO2,MT-CO3	9606.ENSP00000354499,9606.ENSP00000354876,9606.ENSP00000354982
GO Component	GO:0005753	Mitochondrial proton-transporting atp synthase complex	0.0013	3	21	MT-ATP6,MT-ATP8,C14orf2	9606.ENSP00000354632,9606.ENSP00000355265,9606.ENSP00000401770
GO Component	GO:0032991	Protein-containing complex	0.0016	22	5073	CLIP2,SUB1,ZYG11B,HMGB2,REST,MT-CO1,MT-CYB,MT-ATP6,MT-ND5,MT-CO2,MT-ND4,MT-CO3,MT-ND2,MT-ATP8,RPL39,UFL1,EMILIN1,TCF4,C14orf2,CNEP1R1,CAND1,VIM	9606.ENSP00000223398,9606.ENSP00000265073,9606.ENSP00000294353,9606.ENSP00000296503,9606.ENSP00000311816,9606.ENSP00000354499,9606.ENSP00000354554,9606.ENSP00000354632,9606.ENSP00000354813,9606.ENSP00000354876,9606.ENSP00000354961,9606.ENSP00000354982,9606.ENSP00000355046,9606.ENSP00000355265,9606.ENSP00000355315,9606.ENSP00000358283,9606.ENSP00000369677,9606.ENSP00000381382,9606.ENSP00000401770,…
GO Component	GO:0005747	Mitochondrial respiratory chain complex i	0.0108	3	48	MT-ND5,MT-ND4,MT-ND2	9606.ENSP00000354813,9606.ENSP00000354961,9606.ENSP00000355046
GO Component	GO:0005750	Mitochondrial respiratory chain complex iii	0.022	2	12	MT-CO1,MT-CYB	9606.ENSP00000354499,9606.ENSP00000354554
GO Component	GO:0045263	Proton-transporting atp synthase complex, coupling factor f(o)	0.0234	2	13	MT-ATP6,MT-ATP8	9606.ENSP00000354632,9606.ENSP00000355265
STRING clusters	CL:13339	Oxidative phosphorylation	5.37e-13	11	103	MT-CO1,MT-CYB,MT-ATP6,MT-ND6,MT-ND5,MT-CO2,MT-ND4,MT-CO3,MT-ND2,MT-ATP8,C14orf2	9606.ENSP00000354499,9606.ENSP00000354554,9606.ENSP00000354632,9606.ENSP00000354665,9606.ENSP00000354813,9606.ENSP00000354876,9606.ENSP00000354961,9606.ENSP00000354982,9606.ENSP00000355046,9606.ENSP00000355265,9606.ENSP00000401770
STRING clusters	CL:13341	Mitochondrial atp synthesis coupled electron transport	7.29e-06	6	74	MT-CO1,MT-CYB,MT-ND6,MT-ND5,MT-CO2,MT-ND2	9606.ENSP00000354499,9606.ENSP00000354554,9606.ENSP00000354665,9606.ENSP00000354813,9606.ENSP00000354876,9606.ENSP00000355046
STRING clusters	CL:13343	Respiratory chain	0.0028	4	52	MT-CYB,MT-ND6,MT-ND5,MT-ND2	9606.ENSP00000354554,9606.ENSP00000354665,9606.ENSP00000354813,9606.ENSP00000355046
STRING clusters	CL:13415	MELAS syndrome, and Cortical deafness	0.047	2	5	MT-ND6,MT-ND5	9606.ENSP00000354665,9606.ENSP00000354813
STRING clusters	CL:13344	Mitochondrial electron transport, nadh to ubiquinone	0.0472	3	42	MT-ND6,MT-ND5,MT-ND2	9606.ENSP00000354665,9606.ENSP00000354813,9606.ENSP00000355046
KEGG	hsa00190	Oxidative phosphorylation	2.48e-11	10	130	MT-CO1,MT-CYB,MT-ATP6,MT-ND6,MT-ND5,MT-CO2,MT-ND4,MT-CO3,MT-ND2,MT-ATP8	9606.ENSP00000354499,9606.ENSP00000354554,9606.ENSP00000354632,9606.ENSP00000354665,9606.ENSP00000354813,9606.ENSP00000354876,9606.ENSP00000354961,9606.ENSP00000354982,9606.ENSP00000355046,9606.ENSP00000355265
KEGG	hsa05016	Huntington disease	1.25e-09	11	298	REST,MT-CO1,MT-CYB,MT-ATP6,MT-ND6,MT-ND5,MT-CO2,MT-ND4,MT-CO3,MT-ND2,MT-ATP8	9606.ENSP00000311816,9606.ENSP00000354499,9606.ENSP00000354554,9606.ENSP00000354632,9606.ENSP00000354665,9606.ENSP00000354813,9606.ENSP00000354876,9606.ENSP00000354961,9606.ENSP00000354982,9606.ENSP00000355046,9606.ENSP00000355265
KEGG	hsa04714	Thermogenesis	1.76e-09	10	229	MT-CO1,MT-CYB,MT-ATP6,MT-ND6,MT-ND5,MT-CO2,MT-ND4,MT-CO3,MT-ND2,MT-ATP8	9606.ENSP00000354499,9606.ENSP00000354554,9606.ENSP00000354632,9606.ENSP00000354665,9606.ENSP00000354813,9606.ENSP00000354876,9606.ENSP00000354961,9606.ENSP00000354982,9606.ENSP00000355046,9606.ENSP00000355265
KEGG	hsa05012	Parkinson disease	2.06e-09	10	240	MT-CO1,MT-CYB,MT-ATP6,MT-ND6,MT-ND5,MT-CO2,MT-ND4,MT-CO3,MT-ND2,MT-ATP8	9606.ENSP00000354499,9606.ENSP00000354554,9606.ENSP00000354632,9606.ENSP00000354665,9606.ENSP00000354813,9606.ENSP00000354876,9606.ENSP00000354961,9606.ENSP00000354982,9606.ENSP00000355046,9606.ENSP00000355265
KEGG	hsa05020	Prion disease	4.2e-09	10	265	MT-CO1,MT-CYB,MT-ATP6,MT-ND6,MT-ND5,MT-CO2,MT-ND4,MT-CO3,MT-ND2,MT-ATP8	9606.ENSP00000354499,9606.ENSP00000354554,9606.ENSP00000354632,9606.ENSP00000354665,9606.ENSP00000354813,9606.ENSP00000354876,9606.ENSP00000354961,9606.ENSP00000354982,9606.ENSP00000355046,9606.ENSP00000355265
KEGG	hsa05010	Alzheimer disease	5.1e-08	10	355	MT-CO1,MT-CYB,MT-ATP6,MT-ND6,MT-ND5,MT-CO2,MT-ND4,MT-CO3,MT-ND2,MT-ATP8	9606.ENSP00000354499,9606.ENSP00000354554,9606.ENSP00000354632,9606.ENSP00000354665,9606.ENSP00000354813,9606.ENSP00000354876,9606.ENSP00000354961,9606.ENSP00000354982,9606.ENSP00000355046,9606.ENSP00000355265
KEGG	hsa05014	Amyotrophic lateral sclerosis	5.1e-08	10	352	MT-CO1,MT-CYB,MT-ATP6,MT-ND6,MT-ND5,MT-CO2,MT-ND4,MT-CO3,MT-ND2,MT-ATP8	9606.ENSP00000354499,9606.ENSP00000354554,9606.ENSP00000354632,9606.ENSP00000354665,9606.ENSP00000354813,9606.ENSP00000354876,9606.ENSP00000354961,9606.ENSP00000354982,9606.ENSP00000355046,9606.ENSP00000355265
KEGG	hsa04260	Cardiac muscle contraction	0.0011	4	87	MT-CO1,MT-CYB,MT-CO2,MT-CO3	9606.ENSP00000354499,9606.ENSP00000354554,9606.ENSP00000354876,9606.ENSP00000354982
KEGG	hsa01100	Metabolic pathways	0.0019	11	1447	MT-CO1,MT-CYB,MT-ATP6,MT-ND6,MT-ND5,MT-CO2,MT-ND4,MT-CO3,MT-ND2,MT-ATP8,MGAT1	9606.ENSP00000354499,9606.ENSP00000354554,9606.ENSP00000354632,9606.ENSP00000354665,9606.ENSP00000354813,9606.ENSP00000354876,9606.ENSP00000354961,9606.ENSP00000354982,9606.ENSP00000355046,9606.ENSP00000355265,9606.ENSP00000404718
KEGG	hsa04723	Retrograde endocannabinoid signaling	0.0059	4	145	MT-ND6,MT-ND5,MT-ND4,MT-ND2	9606.ENSP00000354665,9606.ENSP00000354813,9606.ENSP00000354961,9606.ENSP00000355046
KEGG	hsa04932	Non-alcoholic fatty liver disease	0.0059	4	148	MT-CO1,MT-CYB,MT-CO2,MT-CO3	9606.ENSP00000354499,9606.ENSP00000354554,9606.ENSP00000354876,9606.ENSP00000354982
Reactome	HSA-163200	Respiratory electron transport, ATP synthesis by chemiosmotic coupling, and heat production by uncoupling proteins.	1.11e-10	10	125	MT-CO1,MT-CYB,MT-ATP6,MT-ND6,MT-ND5,MT-CO2,MT-ND4,MT-CO3,MT-ND2,MT-ATP8	9606.ENSP00000354499,9606.ENSP00000354554,9606.ENSP00000354632,9606.ENSP00000354665,9606.ENSP00000354813,9606.ENSP00000354876,9606.ENSP00000354961,9606.ENSP00000354982,9606.ENSP00000355046,9606.ENSP00000355265
Reactome	HSA-611105	Respiratory electron transport	1.72e-08	8	101	MT-CO1,MT-CYB,MT-ND6,MT-ND5,MT-CO2,MT-ND4,MT-CO3,MT-ND2	9606.ENSP00000354499,9606.ENSP00000354554,9606.ENSP00000354665,9606.ENSP00000354813,9606.ENSP00000354876,9606.ENSP00000354961,9606.ENSP00000354982,9606.ENSP00000355046
Reactome	HSA-6799198	Complex I biogenesis	0.0025	4	55	MT-ND6,MT-ND5,MT-ND4,MT-ND2	9606.ENSP00000354665,9606.ENSP00000354813,9606.ENSP00000354961,9606.ENSP00000355046
WikiPathways	WP111	Electron transport chain: OXPHOS system in mitochondria	5.59e-12	10	103	MT-CO1,MT-CYB,MT-ATP6,MT-ND6,MT-ND5,MT-CO2,MT-ND4,MT-CO3,MT-ND2,MT-ATP8	9606.ENSP00000354499,9606.ENSP00000354554,9606.ENSP00000354632,9606.ENSP00000354665,9606.ENSP00000354813,9606.ENSP00000354876,9606.ENSP00000354961,9606.ENSP00000354982,9606.ENSP00000355046,9606.ENSP00000355265
WikiPathways	WP623	Oxidative phosphorylation	4.67e-05	5	60	MT-ATP6,MT-ND6,MT-ND5,MT-ND4,MT-ND2	9606.ENSP00000354632,9606.ENSP00000354665,9606.ENSP00000354813,9606.ENSP00000354961,9606.ENSP00000355046
WikiPathways	WP4324	Mitochondrial complex I assembly model OXPHOS system	0.0011	4	56	MT-ND6,MT-ND5,MT-ND4,MT-ND2	9606.ENSP00000354665,9606.ENSP00000354813,9606.ENSP00000354961,9606.ENSP00000355046
WikiPathways	WP4922	Mitochondrial complex IV assembly	0.0085	3	35	MT-CO1,MT-CO2,MT-CO3	9606.ENSP00000354499,9606.ENSP00000354876,9606.ENSP00000354982
WikiPathways	WP4396	Nonalcoholic fatty liver disease	0.0303	4	155	MT-CO1,MT-CYB,MT-CO2,MT-CO3	9606.ENSP00000354499,9606.ENSP00000354554,9606.ENSP00000354876,9606.ENSP00000354982
WikiPathways	WP4919	Neuroinflammation	0.0405	2	13	MT-CO1,MT-CO2	9606.ENSP00000354499,9606.ENSP00000354876
Monarch HPO	HP:0004309	Ventricular preexcitation	1.46e-14	9	21	MT-CO1,MT-CYB,MT-ATP6,MT-ND6,MT-ND5,MT-CO2,MT-ND4,MT-CO3,MT-ND2	9606.ENSP00000354499,9606.ENSP00000354554,9606.ENSP00000354632,9606.ENSP00000354665,9606.ENSP00000354813,9606.ENSP00000354876,9606.ENSP00000354961,9606.ENSP00000354982,9606.ENSP00000355046
Monarch HPO	HP:0001112	Leber optic atrophy	4.44e-12	7	10	MT-CYB,MT-ATP6,MT-ND6,MT-ND5,MT-ND4,MT-CO3,MT-ND2	9606.ENSP00000354554,9606.ENSP00000354632,9606.ENSP00000354665,9606.ENSP00000354813,9606.ENSP00000354961,9606.ENSP00000354982,9606.ENSP00000355046
Monarch HPO	HP:0000576	Centrocecal scotoma	7.65e-12	7	12	MT-CYB,MT-ATP6,MT-ND6,MT-ND5,MT-ND4,MT-CO3,MT-ND2	9606.ENSP00000354554,9606.ENSP00000354632,9606.ENSP00000354665,9606.ENSP00000354813,9606.ENSP00000354961,9606.ENSP00000354982,9606.ENSP00000355046
Monarch HPO	HP:0007768	Central retinal vessel vascular tortuosity	7.65e-12	7	12	MT-CYB,MT-ATP6,MT-ND6,MT-ND5,MT-ND4,MT-CO3,MT-ND2	9606.ENSP00000354554,9606.ENSP00000354632,9606.ENSP00000354665,9606.ENSP00000354813,9606.ENSP00000354961,9606.ENSP00000354982,9606.ENSP00000355046
Monarch HPO	HP:0200125	Mitochondrial respiratory chain defects	8.81e-12	7	14	MT-CYB,MT-ATP6,MT-ND6,MT-ND5,MT-ND4,MT-CO3,MT-ND2	9606.ENSP00000354554,9606.ENSP00000354632,9606.ENSP00000354665,9606.ENSP00000354813,9606.ENSP00000354961,9606.ENSP00000354982,9606.ENSP00000355046
Monarch HPO	HP:0007763	Retinal telangiectasia	2.24e-11	7	17	MT-CYB,MT-ATP6,MT-ND6,MT-ND5,MT-ND4,MT-CO3,MT-ND2	9606.ENSP00000354554,9606.ENSP00000354632,9606.ENSP00000354665,9606.ENSP00000354813,9606.ENSP00000354961,9606.ENSP00000354982,9606.ENSP00000355046
Monarch HPO	HP:0007924	Slow decrease in visual acuity	6.2e-10	7	32	MT-CYB,MT-ATP6,MT-ND6,MT-ND5,MT-ND4,MT-CO3,MT-ND2	9606.ENSP00000354554,9606.ENSP00000354632,9606.ENSP00000354665,9606.ENSP00000354813,9606.ENSP00000354961,9606.ENSP00000354982,9606.ENSP00000355046
Monarch HPO	HP:0002572	Episodic vomiting	6.88e-10	7	33	MT-CO1,MT-ATP6,MT-ND6,MT-ND5,MT-CO2,MT-ND4,MT-ND2	9606.ENSP00000354499,9606.ENSP00000354632,9606.ENSP00000354665,9606.ENSP00000354813,9606.ENSP00000354876,9606.ENSP00000354961,9606.ENSP00000355046
Monarch HPO	HP:0003800	Muscle abnormality related to mitochondrial dysfunction	1.3e-09	8	71	MT-CO1,MT-ATP6,MT-ND6,MT-ND5,MT-CO2,MT-ND4,MT-CO3,MT-ND2	9606.ENSP00000354499,9606.ENSP00000354632,9606.ENSP00000354665,9606.ENSP00000354813,9606.ENSP00000354876,9606.ENSP00000354961,9606.ENSP00000354982,9606.ENSP00000355046
Monarch HPO	HP:0000622	Blurred vision	1.43e-09	7	38	MT-CYB,MT-ATP6,MT-ND6,MT-ND5,MT-ND4,MT-CO3,MT-ND2	9606.ENSP00000354554,9606.ENSP00000354632,9606.ENSP00000354665,9606.ENSP00000354813,9606.ENSP00000354961,9606.ENSP00000354982,9606.ENSP00000355046
Monarch HPO	HP:0000603	Central scotoma	1.47e-09	7	39	MT-CYB,MT-ATP6,MT-ND6,MT-ND5,MT-ND4,MT-CO3,MT-ND2	9606.ENSP00000354554,9606.ENSP00000354632,9606.ENSP00000354665,9606.ENSP00000354813,9606.ENSP00000354961,9606.ENSP00000354982,9606.ENSP00000355046
Monarch HPO	HP:0003200	Ragged-red muscle fibers	1.62e-09	7	40	MT-CO1,MT-ATP6,MT-ND6,MT-ND5,MT-CO2,MT-ND4,MT-ND2	9606.ENSP00000354499,9606.ENSP00000354632,9606.ENSP00000354665,9606.ENSP00000354813,9606.ENSP00000354876,9606.ENSP00000354961,9606.ENSP00000355046
Monarch HPO	HP:0003287	Abnormality of mitochondrial metabolism	2.02e-09	9	130	MT-CO1,MT-CYB,MT-ATP6,MT-ND6,MT-ND5,MT-CO2,MT-ND4,MT-CO3,MT-ND2	9606.ENSP00000354499,9606.ENSP00000354554,9606.ENSP00000354632,9606.ENSP00000354665,9606.ENSP00000354813,9606.ENSP00000354876,9606.ENSP00000354961,9606.ENSP00000354982,9606.ENSP00000355046
Monarch HPO	HP:0001009	Telangiectasia	2.3e-09	8	81	MT-CYB,MT-ATP6,MT-ND6,MT-ND5,MT-ND4,MT-CO3,MT-ND2,POLH	9606.ENSP00000354554,9606.ENSP00000354632,9606.ENSP00000354665,9606.ENSP00000354813,9606.ENSP00000354961,9606.ENSP00000354982,9606.ENSP00000355046,9606.ENSP00000361310
Monarch HPO	HP:0012707	Elevated brain lactate level by MRS	4.01e-09	6	21	MT-CO1,MT-ATP6,MT-ND6,MT-ND5,MT-CO2,MT-ND4	9606.ENSP00000354499,9606.ENSP00000354632,9606.ENSP00000354665,9606.ENSP00000354813,9606.ENSP00000354876,9606.ENSP00000354961
Monarch HPO	HP:0002174	Postural tremor	5.2e-09	7	51	MT-CYB,MT-ATP6,MT-ND6,MT-ND5,MT-ND4,MT-CO3,MT-ND2	9606.ENSP00000354554,9606.ENSP00000354632,9606.ENSP00000354665,9606.ENSP00000354813,9606.ENSP00000354961,9606.ENSP00000354982,9606.ENSP00000355046
Monarch HPO	HP:0001138	Optic neuropathy	5.41e-09	7	52	MT-CYB,MT-ATP6,MT-ND6,MT-ND5,MT-ND4,MT-CO3,MT-ND2	9606.ENSP00000354554,9606.ENSP00000354632,9606.ENSP00000354665,9606.ENSP00000354813,9606.ENSP00000354961,9606.ENSP00000354982,9606.ENSP00000355046
Monarch HPO	HP:0002490	Increased CSF lactate	5.41e-09	8	95	MT-CO1,MT-ATP6,MT-ND6,MT-ND5,MT-CO2,MT-ND4,MT-CO3,MT-ND2	9606.ENSP00000354499,9606.ENSP00000354632,9606.ENSP00000354665,9606.ENSP00000354813,9606.ENSP00000354876,9606.ENSP00000354961,9606.ENSP00000354982,9606.ENSP00000355046
Monarch HPO	HP:0003737	Mitochondrial myopathy	5.41e-09	7	53	MT-CO1,MT-ATP6,MT-ND6,MT-ND5,MT-CO2,MT-ND4,MT-ND2	9606.ENSP00000354499,9606.ENSP00000354632,9606.ENSP00000354665,9606.ENSP00000354813,9606.ENSP00000354876,9606.ENSP00000354961,9606.ENSP00000355046
Monarch HPO	HP:0012429	Aplasia/Hypoplasia of the cerebral white matter	5.41e-09	5	7	MT-CO1,MT-ND6,MT-ND5,MT-CO2,MT-ND4	9606.ENSP00000354499,9606.ENSP00000354665,9606.ENSP00000354813,9606.ENSP00000354876,9606.ENSP00000354961
Monarch HPO	HP:0012766	Widened cerebral subarachnoid space	5.41e-09	5	7	MT-CO1,MT-ND6,MT-ND5,MT-CO2,MT-ND4	9606.ENSP00000354499,9606.ENSP00000354665,9606.ENSP00000354813,9606.ENSP00000354876,9606.ENSP00000354961
Monarch HPO	HP:0001271	Polyneuropathy	1.07e-08	7	60	MT-CYB,MT-ATP6,MT-ND6,MT-ND5,MT-ND4,MT-CO3,MT-ND2	9606.ENSP00000354554,9606.ENSP00000354632,9606.ENSP00000354665,9606.ENSP00000354813,9606.ENSP00000354961,9606.ENSP00000354982,9606.ENSP00000355046
Monarch HPO	HP:0005157	Concentric hypertrophic cardiomyopathy	1.07e-08	5	9	MT-CO1,MT-ND6,MT-ND5,MT-CO2,MT-ND4	9606.ENSP00000354499,9606.ENSP00000354665,9606.ENSP00000354813,9606.ENSP00000354876,9606.ENSP00000354961
Monarch HPO	HP:0007327	Mixed demyelinating and axonal polyneuropathy	1.07e-08	5	9	MT-CO1,MT-ND6,MT-ND5,MT-CO2,MT-ND4	9606.ENSP00000354499,9606.ENSP00000354665,9606.ENSP00000354813,9606.ENSP00000354876,9606.ENSP00000354961
Monarch HPO	HP:0100027	Recurrent pancreatitis	1.07e-08	5	9	MT-CO1,MT-ND6,MT-ND5,MT-CO2,MT-ND4	9606.ENSP00000354499,9606.ENSP00000354665,9606.ENSP00000354813,9606.ENSP00000354876,9606.ENSP00000354961
Monarch HPO	HP:0000124	Renal tubular dysfunction	1.13e-08	8	109	MT-CO1,MT-ATP6,MT-ND6,MT-ND5,MT-CO2,MT-ND4,MT-CO3,MT-ND2	9606.ENSP00000354499,9606.ENSP00000354632,9606.ENSP00000354665,9606.ENSP00000354813,9606.ENSP00000354876,9606.ENSP00000354961,9606.ENSP00000354982,9606.ENSP00000355046
Monarch HPO	HP:0000829	Hypoparathyroidism	1.2e-08	6	29	MT-CO1,MT-ND6,MT-ND5,MT-CO2,MT-ND4,FAM111A	9606.ENSP00000354499,9606.ENSP00000354665,9606.ENSP00000354813,9606.ENSP00000354876,9606.ENSP00000354961,9606.ENSP00000434435
Monarch HPO	HP:0003572	Low plasma citrulline	1.36e-08	5	10	MT-ATP6,MT-ND6,MT-ND5,MT-ND4,MT-ND2	9606.ENSP00000354632,9606.ENSP00000354665,9606.ENSP00000354813,9606.ENSP00000354961,9606.ENSP00000355046
Monarch HPO	HP:0002883	Hyperventilation	1.63e-08	6	31	MT-ATP6,MT-ND6,MT-ND5,MT-ND4,MT-ND2,TCF4	9606.ENSP00000354632,9606.ENSP00000354665,9606.ENSP00000354813,9606.ENSP00000354961,9606.ENSP00000355046,9606.ENSP00000381382
Monarch HPO	HP:0025268	Stuttering	1.84e-08	5	11	MT-CO1,MT-ND6,MT-ND5,MT-CO2,MT-ND4	9606.ENSP00000354499,9606.ENSP00000354665,9606.ENSP00000354813,9606.ENSP00000354876,9606.ENSP00000354961
Monarch HPO	HP:0100611	Multiple glomerular cysts	1.84e-08	5	11	MT-ATP6,MT-ND6,MT-ND5,MT-ND4,MT-ND2	9606.ENSP00000354632,9606.ENSP00000354665,9606.ENSP00000354813,9606.ENSP00000354961,9606.ENSP00000355046
Monarch HPO	HP:0007067	Distal peripheral sensory neuropathy	2.48e-08	5	12	MT-CO1,MT-ND6,MT-ND5,MT-CO2,MT-ND4	9606.ENSP00000354499,9606.ENSP00000354665,9606.ENSP00000354813,9606.ENSP00000354876,9606.ENSP00000354961
Monarch HPO	HP:0000572	Visual loss	3.31e-08	9	201	MT-CO1,MT-CYB,MT-ATP6,MT-ND6,MT-ND5,MT-CO2,MT-ND4,MT-CO3,MT-ND2	9606.ENSP00000354499,9606.ENSP00000354554,9606.ENSP00000354632,9606.ENSP00000354665,9606.ENSP00000354813,9606.ENSP00000354876,9606.ENSP00000354961,9606.ENSP00000354982,9606.ENSP00000355046
Monarch HPO	HP:0007141	Sensorimotor neuropathy	4.11e-08	7	77	MT-CO1,MT-ATP6,MT-ND6,MT-ND5,MT-CO2,MT-ND4,MT-ND2	9606.ENSP00000354499,9606.ENSP00000354632,9606.ENSP00000354665,9606.ENSP00000354813,9606.ENSP00000354876,9606.ENSP00000354961,9606.ENSP00000355046
Monarch HPO	HP:0002135	Basal ganglia calcification	4.17e-08	6	38	MT-CO1,MT-ND6,MT-ND5,MT-CO2,MT-ND4,FAM111A	9606.ENSP00000354499,9606.ENSP00000354665,9606.ENSP00000354813,9606.ENSP00000354876,9606.ENSP00000354961,9606.ENSP00000434435
Monarch HPO	HP:0001716	Wolff-Parkinson-White syndrome	4.26e-08	5	14	MT-CO1,MT-ND6,MT-ND5,MT-CO2,MT-ND4	9606.ENSP00000354499,9606.ENSP00000354665,9606.ENSP00000354813,9606.ENSP00000354876,9606.ENSP00000354961
Monarch HPO	HP:0002401	Stroke-like episode	4.26e-08	5	14	MT-CO1,MT-ND6,MT-ND5,MT-CO2,MT-ND4	9606.ENSP00000354499,9606.ENSP00000354665,9606.ENSP00000354813,9606.ENSP00000354876,9606.ENSP00000354961
Monarch HPO	HP:0008316	Abnormal mitochondria in muscle tissue	4.52e-08	6	39	MT-CO1,MT-ND6,MT-ND5,MT-CO2,MT-ND4,MT-ND2	9606.ENSP00000354499,9606.ENSP00000354665,9606.ENSP00000354813,9606.ENSP00000354876,9606.ENSP00000354961,9606.ENSP00000355046
Monarch HPO	HP:0003198	Myopathy	5.24e-08	9	216	MT-CO1,MT-CYB,MT-ATP6,MT-ND6,MT-ND5,MT-CO2,MT-ND4,MT-CO3,MT-ND2	9606.ENSP00000354499,9606.ENSP00000354554,9606.ENSP00000354632,9606.ENSP00000354665,9606.ENSP00000354813,9606.ENSP00000354876,9606.ENSP00000354961,9606.ENSP00000354982,9606.ENSP00000355046
Monarch HPO	HP:0007159	Fluctuations in consciousness	5.24e-08	5	15	MT-CO1,MT-ND6,MT-ND5,MT-CO2,MT-ND4	9606.ENSP00000354499,9606.ENSP00000354665,9606.ENSP00000354813,9606.ENSP00000354876,9606.ENSP00000354961
Monarch HPO	HP:0000816	Abnormality of Krebs cycle metabolism	6.49e-08	5	16	MT-ATP6,MT-ND6,MT-ND5,MT-ND4,MT-ND2	9606.ENSP00000354632,9606.ENSP00000354665,9606.ENSP00000354813,9606.ENSP00000354961,9606.ENSP00000355046
Monarch HPO	HP:0001123	Visual field defect	6.95e-08	9	225	MT-CO1,MT-CYB,MT-ATP6,MT-ND6,MT-ND5,MT-CO2,MT-ND4,MT-CO3,MT-ND2	9606.ENSP00000354499,9606.ENSP00000354554,9606.ENSP00000354632,9606.ENSP00000354665,9606.ENSP00000354813,9606.ENSP00000354876,9606.ENSP00000354961,9606.ENSP00000354982,9606.ENSP00000355046
Monarch HPO	HP:0031546	Cardiac conduction abnormality	7.4e-08	7	87	MT-CO1,MT-ATP6,MT-ND6,MT-ND5,MT-CO2,MT-ND4,MT-ND2	9606.ENSP00000354499,9606.ENSP00000354632,9606.ENSP00000354665,9606.ENSP00000354813,9606.ENSP00000354876,9606.ENSP00000354961,9606.ENSP00000355046
Monarch HPO	HP:0004389	Intestinal pseudo-obstruction	7.95e-08	5	17	MT-CO1,MT-ND6,MT-ND5,MT-CO2,MT-ND4	9606.ENSP00000354499,9606.ENSP00000354665,9606.ENSP00000354813,9606.ENSP00000354876,9606.ENSP00000354961
Monarch HPO	HP:0031434	Abnormal speech prosody	7.95e-08	5	17	MT-ATP6,MT-ND6,MT-ND5,MT-ND4,MT-ND2	9606.ENSP00000354632,9606.ENSP00000354665,9606.ENSP00000354813,9606.ENSP00000354961,9606.ENSP00000355046
Monarch HPO	HP:0000114	Proximal tubulopathy	8.26e-08	6	45	MT-CO1,MT-ND6,MT-ND5,MT-CO2,MT-ND4,MT-ND2	9606.ENSP00000354499,9606.ENSP00000354665,9606.ENSP00000354813,9606.ENSP00000354876,9606.ENSP00000354961,9606.ENSP00000355046
Monarch HPO	HP:0003481	Segmental peripheral demyelination/remyelination	9.65e-08	5	18	MT-ATP6,MT-ND6,MT-ND5,MT-ND4,MT-ND2	9606.ENSP00000354632,9606.ENSP00000354665,9606.ENSP00000354813,9606.ENSP00000354961,9606.ENSP00000355046
Monarch HPO	HP:0003648	Lacticaciduria	9.65e-08	5	18	MT-ATP6,MT-ND6,MT-ND5,MT-ND4,MT-ND2	9606.ENSP00000354632,9606.ENSP00000354665,9606.ENSP00000354813,9606.ENSP00000354961,9606.ENSP00000355046
Monarch HPO	HP:0004885	Episodic respiratory distress	9.65e-08	5	18	MT-ATP6,MT-ND6,MT-ND5,MT-ND4,MT-ND2	9606.ENSP00000354632,9606.ENSP00000354665,9606.ENSP00000354813,9606.ENSP00000354961,9606.ENSP00000355046
Monarch HPO	HP:0001345	Psychotic mentation	1.16e-07	5	19	MT-CO1,MT-ND6,MT-ND5,MT-CO2,MT-ND4	9606.ENSP00000354499,9606.ENSP00000354665,9606.ENSP00000354813,9606.ENSP00000354876,9606.ENSP00000354961
Monarch HPO	HP:0003128	Lactic acidosis	1.33e-07	8	163	MT-CO1,MT-ATP6,MT-ND6,MT-ND5,MT-CO2,MT-ND4,MT-CO3,MT-ND2	9606.ENSP00000354499,9606.ENSP00000354632,9606.ENSP00000354665,9606.ENSP00000354813,9606.ENSP00000354876,9606.ENSP00000354961,9606.ENSP00000354982,9606.ENSP00000355046
Monarch HPO	HP:0001045	Vitiligo	1.38e-07	5	20	MT-CO1,MT-ND6,MT-ND5,MT-CO2,MT-ND4	9606.ENSP00000354499,9606.ENSP00000354665,9606.ENSP00000354813,9606.ENSP00000354876,9606.ENSP00000354961
Monarch HPO	HP:0000580	Pigmentary retinopathy	1.72e-07	8	170	MT-CO1,MT-ATP6,MT-ND6,MT-ND5,MT-CO2,MT-ND4,MT-CO3,MT-ND2	9606.ENSP00000354499,9606.ENSP00000354632,9606.ENSP00000354665,9606.ENSP00000354813,9606.ENSP00000354876,9606.ENSP00000354961,9606.ENSP00000354982,9606.ENSP00000355046
Monarch HPO	HP:0002151	Increased serum lactate	1.86e-07	8	172	MT-CO1,MT-ATP6,MT-ND6,MT-ND5,MT-CO2,MT-ND4,MT-CO3,MT-ND2	9606.ENSP00000354499,9606.ENSP00000354632,9606.ENSP00000354665,9606.ENSP00000354813,9606.ENSP00000354876,9606.ENSP00000354961,9606.ENSP00000354982,9606.ENSP00000355046
Monarch HPO	HP:0010794	Impaired visuospatial constructive cognition	1.95e-07	5	22	MT-CO1,MT-ND6,MT-ND5,MT-CO2,MT-ND4	9606.ENSP00000354499,9606.ENSP00000354665,9606.ENSP00000354813,9606.ENSP00000354876,9606.ENSP00000354961
Monarch HPO	HP:0002331	Recurrent paroxysmal headache	2.34e-07	5	23	MT-CO1,MT-ND6,MT-ND5,MT-CO2,MT-ND4	9606.ENSP00000354499,9606.ENSP00000354665,9606.ENSP00000354813,9606.ENSP00000354876,9606.ENSP00000354961
Monarch HPO	HP:0002098	Respiratory distress	2.81e-07	8	183	MT-CO1,MT-ATP6,MT-ND6,MT-ND5,MT-CO2,MT-ND4,MT-CO3,MT-ND2	9606.ENSP00000354499,9606.ENSP00000354632,9606.ENSP00000354665,9606.ENSP00000354813,9606.ENSP00000354876,9606.ENSP00000354961,9606.ENSP00000354982,9606.ENSP00000355046
Monarch HPO	HP:0011675	Arrhythmia	3.49e-07	9	282	MT-CO1,MT-CYB,MT-ATP6,MT-ND6,MT-ND5,MT-CO2,MT-ND4,MT-CO3,MT-ND2	9606.ENSP00000354499,9606.ENSP00000354554,9606.ENSP00000354632,9606.ENSP00000354665,9606.ENSP00000354813,9606.ENSP00000354876,9606.ENSP00000354961,9606.ENSP00000354982,9606.ENSP00000355046
Monarch HPO	HP:0000590	Progressive external ophthalmoplegia	3.82e-07	5	26	MT-CO1,MT-ND6,MT-ND5,MT-CO2,MT-ND4	9606.ENSP00000354499,9606.ENSP00000354665,9606.ENSP00000354813,9606.ENSP00000354876,9606.ENSP00000354961
Monarch HPO	HP:0007302	Bipolar affective disorder	3.82e-07	5	26	MT-CO1,MT-ND6,MT-ND5,MT-CO2,MT-ND4	9606.ENSP00000354499,9606.ENSP00000354665,9606.ENSP00000354813,9606.ENSP00000354876,9606.ENSP00000354961
Monarch HPO	HP:0001410	Decreased liver function	3.99e-07	8	193	MT-CO1,MT-ATP6,MT-ND6,MT-ND5,MT-CO2,MT-ND4,MT-CO3,MT-ND2	9606.ENSP00000354499,9606.ENSP00000354632,9606.ENSP00000354665,9606.ENSP00000354813,9606.ENSP00000354876,9606.ENSP00000354961,9606.ENSP00000354982,9606.ENSP00000355046
Monarch HPO	HP:0000519	Developmental cataract	4.91e-07	7	122	MT-CO1,MT-ND6,MT-ND5,MT-CO2,MT-ND4,FAM111A,VIM	9606.ENSP00000354499,9606.ENSP00000354665,9606.ENSP00000354813,9606.ENSP00000354876,9606.ENSP00000354961,9606.ENSP00000434435,9606.ENSP00000446007
Monarch HPO	HP:0002134	Abnormality of the basal ganglia	5.78e-07	8	204	MT-CO1,MT-ATP6,MT-ND6,MT-ND5,MT-CO2,MT-ND4,MT-ND2,FAM111A	9606.ENSP00000354499,9606.ENSP00000354632,9606.ENSP00000354665,9606.ENSP00000354813,9606.ENSP00000354876,9606.ENSP00000354961,9606.ENSP00000355046,9606.ENSP00000434435
Monarch HPO	HP:0000095	Abnormal renal glomerulus morphology	7.49e-07	7	131	MT-CO1,MT-ATP6,MT-ND6,MT-ND5,MT-CO2,MT-ND4,MT-ND2	9606.ENSP00000354499,9606.ENSP00000354632,9606.ENSP00000354665,9606.ENSP00000354813,9606.ENSP00000354876,9606.ENSP00000354961,9606.ENSP00000355046
Monarch HPO	HP:0011276	Vascular skin abnormality	7.55e-07	10	434	MT-CO1,MT-CYB,MT-ATP6,MT-ND6,MT-ND5,MT-CO2,MT-ND4,MT-CO3,MT-ND2,POLH	9606.ENSP00000354499,9606.ENSP00000354554,9606.ENSP00000354632,9606.ENSP00000354665,9606.ENSP00000354813,9606.ENSP00000354876,9606.ENSP00000354961,9606.ENSP00000354982,9606.ENSP00000355046,9606.ENSP00000361310
Monarch HPO	HP:0004303	Abnormal muscle fiber morphology	7.91e-07	8	214	MT-CO1,MT-ATP6,MT-ND6,MT-ND5,MT-CO2,MT-ND4,MT-CO3,MT-ND2	9606.ENSP00000354499,9606.ENSP00000354632,9606.ENSP00000354665,9606.ENSP00000354813,9606.ENSP00000354876,9606.ENSP00000354961,9606.ENSP00000354982,9606.ENSP00000355046
Monarch HPO	HP:0002579	Gastrointestinal dysmotility	1.05e-06	6	76	MT-CO1,MT-ATP6,MT-ND6,MT-ND5,MT-CO2,MT-ND4	9606.ENSP00000354499,9606.ENSP00000354632,9606.ENSP00000354665,9606.ENSP00000354813,9606.ENSP00000354876,9606.ENSP00000354961
Monarch HPO	HP:0000408	Progressive sensorineural hearing impairment	1.25e-06	5	35	MT-CO1,MT-ND6,MT-ND5,MT-CO2,MT-ND4	9606.ENSP00000354499,9606.ENSP00000354665,9606.ENSP00000354813,9606.ENSP00000354876,9606.ENSP00000354961
Monarch HPO	HP:0002922	Increased CSF protein	1.25e-06	5	35	MT-CO1,MT-ND6,MT-ND5,MT-CO2,MT-ND4	9606.ENSP00000354499,9606.ENSP00000354665,9606.ENSP00000354813,9606.ENSP00000354876,9606.ENSP00000354961
Monarch HPO	HP:0001644	Dilated cardiomyopathy	1.28e-06	7	144	MT-CO1,MT-ATP6,MT-ND6,MT-ND5,MT-CO2,MT-ND4,MT-ND2	9606.ENSP00000354499,9606.ENSP00000354632,9606.ENSP00000354665,9606.ENSP00000354813,9606.ENSP00000354876,9606.ENSP00000354961,9606.ENSP00000355046
Monarch HPO	HP:0002123	Generalized myoclonic seizure	1.39e-06	7	146	PRDM8,MT-ATP6,MT-ND6,MT-ND5,MT-ND4,MT-ND2,TCF4	9606.ENSP00000339764,9606.ENSP00000354632,9606.ENSP00000354665,9606.ENSP00000354813,9606.ENSP00000354961,9606.ENSP00000355046,9606.ENSP00000381382
Monarch HPO	HP:0003348	Hyperalaninemia	1.54e-06	5	37	MT-ATP6,MT-ND6,MT-ND5,MT-ND4,MT-ND2	9606.ENSP00000354632,9606.ENSP00000354665,9606.ENSP00000354813,9606.ENSP00000354961,9606.ENSP00000355046
Monarch HPO	HP:0100651	Type I diabetes mellitus	1.54e-06	5	37	MT-CO1,MT-ND6,MT-ND5,MT-CO2,MT-ND4	9606.ENSP00000354499,9606.ENSP00000354665,9606.ENSP00000354813,9606.ENSP00000354876,9606.ENSP00000354961
Monarch HPO	HP:0000709	Psychosis	1.57e-06	6	83	PRDM8,MT-CO1,MT-ND6,MT-ND5,MT-CO2,MT-ND4	9606.ENSP00000339764,9606.ENSP00000354499,9606.ENSP00000354665,9606.ENSP00000354813,9606.ENSP00000354876,9606.ENSP00000354961
Monarch HPO	HP:0000751	Personality changes	1.67e-06	5	38	MT-CO1,MT-ND6,MT-ND5,MT-CO2,MT-ND4	9606.ENSP00000354499,9606.ENSP00000354665,9606.ENSP00000354813,9606.ENSP00000354876,9606.ENSP00000354961
Monarch HPO	HP:0001639	Hypertrophic cardiomyopathy	1.67e-06	8	240	MT-CO1,MT-ATP6,MT-ND6,MT-ND5,MT-CO2,MT-ND4,MT-CO3,MT-ND2	9606.ENSP00000354499,9606.ENSP00000354632,9606.ENSP00000354665,9606.ENSP00000354813,9606.ENSP00000354876,9606.ENSP00000354961,9606.ENSP00000354982,9606.ENSP00000355046
Monarch HPO	HP:0002483	Bulbar signs	1.67e-06	5	38	MT-ATP6,MT-ND6,MT-ND5,MT-ND4,MT-ND2	9606.ENSP00000354632,9606.ENSP00000354665,9606.ENSP00000354813,9606.ENSP00000354961,9606.ENSP00000355046
Monarch HPO	HP:0000763	Sensory neuropathy	1.79e-06	6	86	MT-CO1,MT-ATP6,MT-ND6,MT-ND5,MT-CO2,MT-ND4	9606.ENSP00000354499,9606.ENSP00000354632,9606.ENSP00000354665,9606.ENSP00000354813,9606.ENSP00000354876,9606.ENSP00000354961
Monarch HPO	HP:0012377	Hemianopia	1.79e-06	5	39	MT-CO1,MT-ND6,MT-ND5,MT-CO2,MT-ND4	9606.ENSP00000354499,9606.ENSP00000354665,9606.ENSP00000354813,9606.ENSP00000354876,9606.ENSP00000354961
Monarch HPO	HP:0012704	Widened subarachnoid space	2.43e-06	6	91	MT-CO1,MT-ND6,MT-ND5,MT-CO2,MT-ND4,TCF4	9606.ENSP00000354499,9606.ENSP00000354665,9606.ENSP00000354813,9606.ENSP00000354876,9606.ENSP00000354961,9606.ENSP00000381382
Monarch HPO	HP:0007183	Focal T2 hyperintense basal ganglia lesion	2.45e-06	5	42	MT-ATP6,MT-ND6,MT-ND5,MT-ND4,MT-ND2	9606.ENSP00000354632,9606.ENSP00000354665,9606.ENSP00000354813,9606.ENSP00000354961,9606.ENSP00000355046
Monarch HPO	HP:0000726	Dementia	2.5e-06	7	163	PRDM8,MT-CO1,MT-ATP6,MT-ND6,MT-ND5,MT-CO2,MT-ND4	9606.ENSP00000339764,9606.ENSP00000354499,9606.ENSP00000354632,9606.ENSP00000354665,9606.ENSP00000354813,9606.ENSP00000354876,9606.ENSP00000354961
Monarch HPO	HP:0009830	Peripheral neuropathy	2.66e-06	9	374	MT-CO1,MT-CYB,MT-ATP6,MT-ND6,MT-ND5,MT-CO2,MT-ND4,MT-CO3,MT-ND2	9606.ENSP00000354499,9606.ENSP00000354554,9606.ENSP00000354632,9606.ENSP00000354665,9606.ENSP00000354813,9606.ENSP00000354876,9606.ENSP00000354961,9606.ENSP00000354982,9606.ENSP00000355046
Monarch HPO	HP:0000097	Focal segmental glomerulosclerosis	2.95e-06	5	44	MT-CO1,MT-ND6,MT-ND5,MT-CO2,MT-ND4	9606.ENSP00000354499,9606.ENSP00000354665,9606.ENSP00000354813,9606.ENSP00000354876,9606.ENSP00000354961
Monarch HPO	HP:0002069	Bilateral tonic-clonic seizure	2.96e-06	8	263	MT-CO1,MT-ATP6,MT-ND6,MT-ND5,MT-CO2,MT-ND4,MT-ND2,TCF4	9606.ENSP00000354499,9606.ENSP00000354632,9606.ENSP00000354665,9606.ENSP00000354813,9606.ENSP00000354876,9606.ENSP00000354961,9606.ENSP00000355046,9606.ENSP00000381382
Monarch HPO	HP:0003546	Exercise intolerance	3.12e-06	6	96	MT-CO1,MT-ND6,MT-ND5,MT-CO2,MT-ND4,MT-CO3	9606.ENSP00000354499,9606.ENSP00000354665,9606.ENSP00000354813,9606.ENSP00000354876,9606.ENSP00000354961,9606.ENSP00000354982
Monarch HPO	HP:0002045	Hypothermia	3.19e-06	5	45	MT-ATP6,MT-ND6,MT-ND5,MT-ND4,MT-ND2	9606.ENSP00000354632,9606.ENSP00000354665,9606.ENSP00000354813,9606.ENSP00000354961,9606.ENSP00000355046
Monarch HPO	HP:0007108	Demyelinating peripheral neuropathy	3.77e-06	5	47	MT-ATP6,MT-ND6,MT-ND5,MT-ND4,MT-ND2	9606.ENSP00000354632,9606.ENSP00000354665,9606.ENSP00000354813,9606.ENSP00000354961,9606.ENSP00000355046
Monarch HPO	HP:0008047	Abnormality of the vasculature of the eye	4.23e-06	8	279	MT-CYB,MT-ATP6,MT-ND6,MT-ND5,MT-ND4,MT-CO3,MT-ND2,POLH	9606.ENSP00000354554,9606.ENSP00000354632,9606.ENSP00000354665,9606.ENSP00000354813,9606.ENSP00000354961,9606.ENSP00000354982,9606.ENSP00000355046,9606.ENSP00000361310
Monarch HPO	HP:0002381	Aphasia	4.71e-06	6	105	MT-CO1,MT-ND6,MT-ND5,MT-CO2,MT-ND4,TCF4	9606.ENSP00000354499,9606.ENSP00000354665,9606.ENSP00000354813,9606.ENSP00000354876,9606.ENSP00000354961,9606.ENSP00000381382
Monarch HPO	HP:0000998	Hypertrichosis	6.47e-06	6	112	MT-CO1,MT-ATP6,MT-ND6,MT-ND5,MT-CO2,MT-ND4	9606.ENSP00000354499,9606.ENSP00000354632,9606.ENSP00000354665,9606.ENSP00000354813,9606.ENSP00000354876,9606.ENSP00000354961
Monarch HPO	HP:0008619	Bilateral sensorineural hearing impairment	8.32e-06	5	57	MT-CO1,MT-ND6,MT-ND5,MT-CO2,MT-ND4	9606.ENSP00000354499,9606.ENSP00000354665,9606.ENSP00000354813,9606.ENSP00000354876,9606.ENSP00000354961
Monarch HPO	HP:0001336	Myoclonus	9.23e-06	8	313	PRDM8,MT-CO1,MT-ATP6,MT-ND6,MT-ND5,MT-CO2,MT-ND4,TCF4	9606.ENSP00000339764,9606.ENSP00000354499,9606.ENSP00000354632,9606.ENSP00000354665,9606.ENSP00000354813,9606.ENSP00000354876,9606.ENSP00000354961,9606.ENSP00000381382
Monarch HPO	HP:0005162	Abnormal left ventricular function	1.29e-05	5	63	MT-CO1,MT-ND6,MT-ND5,MT-CO2,MT-ND4	9606.ENSP00000354499,9606.ENSP00000354665,9606.ENSP00000354813,9606.ENSP00000354876,9606.ENSP00000354961
Monarch HPO	HP:0003477	Peripheral axonal neuropathy	1.38e-05	6	129	MT-CO1,MT-ATP6,MT-ND6,MT-ND5,MT-CO2,MT-ND4	9606.ENSP00000354499,9606.ENSP00000354632,9606.ENSP00000354665,9606.ENSP00000354813,9606.ENSP00000354876,9606.ENSP00000354961
Monarch HPO	HP:0001269	Hemiparesis	1.8e-05	5	68	MT-CO1,MT-ND6,MT-ND5,MT-CO2,MT-ND4	9606.ENSP00000354499,9606.ENSP00000354665,9606.ENSP00000354813,9606.ENSP00000354876,9606.ENSP00000354961
Monarch HPO	HP:0002921	Abnormality of the cerebrospinal fluid	2.07e-05	9	493	MT-CO1,MT-ATP6,MT-ND6,MT-ND5,MT-CO2,MT-ND4,MT-CO3,MT-ND2,FAM111A	9606.ENSP00000354499,9606.ENSP00000354632,9606.ENSP00000354665,9606.ENSP00000354813,9606.ENSP00000354876,9606.ENSP00000354961,9606.ENSP00000354982,9606.ENSP00000355046,9606.ENSP00000434435
Monarch HPO	HP:0001945	Fever	2.32e-05	7	238	MT-CO1,MT-ATP6,MT-ND6,MT-ND5,MT-CO2,MT-ND4,MT-ND2	9606.ENSP00000354499,9606.ENSP00000354632,9606.ENSP00000354665,9606.ENSP00000354813,9606.ENSP00000354876,9606.ENSP00000354961,9606.ENSP00000355046
Monarch HPO	HP:0001251	Ataxia	2.4e-05	11	853	PRDM8,MT-CO1,MT-CYB,MT-ATP6,MT-ND6,MT-ND5,MT-CO2,MT-ND4,MT-CO3,MT-ND2,TCF4	9606.ENSP00000339764,9606.ENSP00000354499,9606.ENSP00000354554,9606.ENSP00000354632,9606.ENSP00000354665,9606.ENSP00000354813,9606.ENSP00000354876,9606.ENSP00000354961,9606.ENSP00000354982,9606.ENSP00000355046,9606.ENSP00000381382
Monarch HPO	HP:0012795	Abnormality of the optic disc	2.43e-05	10	669	MT-CO1,MT-CYB,MT-ATP6,MT-ND6,MT-ND5,MT-CO2,MT-ND4,MT-CO3,MT-ND2,FAM111A	9606.ENSP00000354499,9606.ENSP00000354554,9606.ENSP00000354632,9606.ENSP00000354665,9606.ENSP00000354813,9606.ENSP00000354876,9606.ENSP00000354961,9606.ENSP00000354982,9606.ENSP00000355046,9606.ENSP00000434435
Monarch HPO	HP:0000597	Ophthalmoparesis	2.53e-05	7	242	MT-CO1,MT-ATP6,MT-ND6,MT-ND5,MT-CO2,MT-ND4,MT-ND2	9606.ENSP00000354499,9606.ENSP00000354632,9606.ENSP00000354665,9606.ENSP00000354813,9606.ENSP00000354876,9606.ENSP00000354961,9606.ENSP00000355046
Monarch HPO	HP:0000091	Abnormal renal tubule morphology	3.61e-05	5	80	MT-ATP6,MT-ND6,MT-ND5,MT-ND4,MT-ND2	9606.ENSP00000354632,9606.ENSP00000354665,9606.ENSP00000354813,9606.ENSP00000354961,9606.ENSP00000355046
Monarch HPO	HP:0001712	Left ventricular hypertrophy	3.61e-05	5	80	MT-CO1,MT-ND6,MT-ND5,MT-CO2,MT-ND4	9606.ENSP00000354499,9606.ENSP00000354665,9606.ENSP00000354813,9606.ENSP00000354876,9606.ENSP00000354961
Monarch HPO	HP:0000648	Optic atrophy	4.45e-05	9	547	MT-CO1,MT-CYB,MT-ATP6,MT-ND6,MT-ND5,MT-CO2,MT-ND4,MT-CO3,MT-ND2	9606.ENSP00000354499,9606.ENSP00000354554,9606.ENSP00000354632,9606.ENSP00000354665,9606.ENSP00000354813,9606.ENSP00000354876,9606.ENSP00000354961,9606.ENSP00000354982,9606.ENSP00000355046
Monarch HPO	HP:0002076	Migraine	5.05e-05	5	87	MT-CO1,MT-ND6,MT-ND5,MT-CO2,MT-ND4	9606.ENSP00000354499,9606.ENSP00000354665,9606.ENSP00000354813,9606.ENSP00000354876,9606.ENSP00000354961
Monarch HPO	HP:0001298	Encephalopathy	5.45e-05	7	276	MT-CO1,MT-ND6,MT-ND5,MT-CO2,MT-ND4,MT-ND2,TCF4	9606.ENSP00000354499,9606.ENSP00000354665,9606.ENSP00000354813,9606.ENSP00000354876,9606.ENSP00000354961,9606.ENSP00000355046,9606.ENSP00000381382
Monarch HPO	HP:0000504	Abnormality of vision	5.62e-05	12	1159	MT-CO1,MT-CYB,MT-ATP6,MT-ND6,MT-ND5,MT-CO2,MT-ND4,MT-CO3,MT-ND2,POLH,TCF4,VIM	9606.ENSP00000354499,9606.ENSP00000354554,9606.ENSP00000354632,9606.ENSP00000354665,9606.ENSP00000354813,9606.ENSP00000354876,9606.ENSP00000354961,9606.ENSP00000354982,9606.ENSP00000355046,9606.ENSP00000361310,9606.ENSP00000381382,9606.ENSP00000446007
Monarch HPO	HP:0000112	Nephropathy	6.09e-05	5	91	MT-CO1,MT-ND6,MT-ND5,MT-CO2,MT-ND4	9606.ENSP00000354499,9606.ENSP00000354665,9606.ENSP00000354813,9606.ENSP00000354876,9606.ENSP00000354961
Monarch HPO	HP:0012469	Infantile spasms	7.05e-05	5	94	MT-ATP6,MT-ND6,MT-ND5,MT-ND4,MT-ND2	9606.ENSP00000354632,9606.ENSP00000354665,9606.ENSP00000354813,9606.ENSP00000354961,9606.ENSP00000355046
Monarch HPO	HP:0001903	Anemia	7.33e-05	8	426	MT-CO1,MT-ATP6,MT-ND6,MT-ND5,MT-CO2,MT-ND4,MT-CO3,FAM111A	9606.ENSP00000354499,9606.ENSP00000354632,9606.ENSP00000354665,9606.ENSP00000354813,9606.ENSP00000354876,9606.ENSP00000354961,9606.ENSP00000354982,9606.ENSP00000434435
Monarch HPO	HP:0011097	Epileptic spasm	7.93e-05	6	182	MT-ATP6,MT-ND6,MT-ND5,MT-ND4,MT-ND2,TCF4	9606.ENSP00000354632,9606.ENSP00000354665,9606.ENSP00000354813,9606.ENSP00000354961,9606.ENSP00000355046,9606.ENSP00000381382
Monarch HPO	HP:0002354	Memory impairment	8.37e-05	5	98	MT-CO1,MT-ND6,MT-ND5,MT-CO2,MT-ND4	9606.ENSP00000354499,9606.ENSP00000354665,9606.ENSP00000354813,9606.ENSP00000354876,9606.ENSP00000354961
Monarch HPO	HP:0010783	Erythema	8.73e-05	5	99	MT-CO1,MT-ND6,MT-ND5,MT-CO2,MT-ND4	9606.ENSP00000354499,9606.ENSP00000354665,9606.ENSP00000354813,9606.ENSP00000354876,9606.ENSP00000354961
Monarch HPO	HP:0000505	Visual impairment	8.99e-05	11	993	MT-CO1,MT-CYB,MT-ATP6,MT-ND6,MT-ND5,MT-CO2,MT-ND4,MT-CO3,MT-ND2,TCF4,VIM	9606.ENSP00000354499,9606.ENSP00000354554,9606.ENSP00000354632,9606.ENSP00000354665,9606.ENSP00000354813,9606.ENSP00000354876,9606.ENSP00000354961,9606.ENSP00000354982,9606.ENSP00000355046,9606.ENSP00000381382,9606.ENSP00000446007
Monarch HPO	HP:0002072	Chorea	9.13e-05	6	188	MT-ATP6,MT-ND6,MT-ND5,MT-ND4,MT-ND2,TCF4	9606.ENSP00000354632,9606.ENSP00000354665,9606.ENSP00000354813,9606.ENSP00000354961,9606.ENSP00000355046,9606.ENSP00000381382
Monarch HPO	HP:0001635	Congestive heart failure	0.0001	6	193	MT-CO1,MT-ATP6,MT-ND6,MT-ND5,MT-CO2,MT-ND4	9606.ENSP00000354499,9606.ENSP00000354632,9606.ENSP00000354665,9606.ENSP00000354813,9606.ENSP00000354876,9606.ENSP00000354961
Monarch HPO	HP:0002066	Gait ataxia	0.0001	6	193	MT-ATP6,MT-ND6,MT-ND5,MT-ND4,MT-ND2,TCF4	9606.ENSP00000354632,9606.ENSP00000354665,9606.ENSP00000354813,9606.ENSP00000354961,9606.ENSP00000355046,9606.ENSP00000381382
Monarch HPO	HP:0002793	Abnormal pattern of respiration	0.00011	9	624	MT-CO1,MT-ATP6,MT-ND6,MT-ND5,MT-CO2,MT-ND4,MT-CO3,MT-ND2,TCF4	9606.ENSP00000354499,9606.ENSP00000354632,9606.ENSP00000354665,9606.ENSP00000354813,9606.ENSP00000354876,9606.ENSP00000354961,9606.ENSP00000354982,9606.ENSP00000355046,9606.ENSP00000381382
Monarch HPO	HP:0100704	Cerebral visual impairment	0.00013	6	202	MT-CO1,MT-ND6,MT-ND5,MT-CO2,MT-ND4,TCF4	9606.ENSP00000354499,9606.ENSP00000354665,9606.ENSP00000354813,9606.ENSP00000354876,9606.ENSP00000354961,9606.ENSP00000381382
Monarch HPO	HP:0000479	Abnormal retinal morphology	0.00014	10	835	MT-CO1,MT-CYB,MT-ATP6,MT-ND6,MT-ND5,MT-CO2,MT-ND4,MT-CO3,MT-ND2,FAM111A	9606.ENSP00000354499,9606.ENSP00000354554,9606.ENSP00000354632,9606.ENSP00000354665,9606.ENSP00000354813,9606.ENSP00000354876,9606.ENSP00000354961,9606.ENSP00000354982,9606.ENSP00000355046,9606.ENSP00000434435
Monarch HPO	HP:0004372	Reduced consciousness/confusion	0.00014	7	325	PRDM8,MT-CO1,MT-ND6,MT-ND5,MT-CO2,MT-ND4,MT-ND2	9606.ENSP00000339764,9606.ENSP00000354499,9606.ENSP00000354665,9606.ENSP00000354813,9606.ENSP00000354876,9606.ENSP00000354961,9606.ENSP00000355046
Monarch HPO	HP:0000819	Diabetes mellitus	0.00016	7	335	MT-CO1,MT-ATP6,MT-ND6,MT-ND5,MT-CO2,MT-ND4,MT-ND2	9606.ENSP00000354499,9606.ENSP00000354632,9606.ENSP00000354665,9606.ENSP00000354813,9606.ENSP00000354876,9606.ENSP00000354961,9606.ENSP00000355046
Monarch HPO	HP:0001332	Dystonia	0.00016	8	480	MT-CYB,MT-ATP6,MT-ND6,MT-ND5,MT-ND4,MT-CO3,MT-ND2,TCF4	9606.ENSP00000354554,9606.ENSP00000354632,9606.ENSP00000354665,9606.ENSP00000354813,9606.ENSP00000354961,9606.ENSP00000354982,9606.ENSP00000355046,9606.ENSP00000381382
Monarch HPO	HP:0001438	Abnormal abdomen morphology	0.00016	9	653	MT-CO1,MT-ATP6,MT-ND6,MT-ND5,MT-CO2,MT-ND4,MT-CO3,MT-ND2,FAM111A	9606.ENSP00000354499,9606.ENSP00000354632,9606.ENSP00000354665,9606.ENSP00000354813,9606.ENSP00000354876,9606.ENSP00000354961,9606.ENSP00000354982,9606.ENSP00000355046,9606.ENSP00000434435
Monarch HPO	HP:0002092	Pulmonary arterial hypertension	0.00016	5	114	MT-CO1,MT-ND6,MT-ND5,MT-CO2,MT-ND4	9606.ENSP00000354499,9606.ENSP00000354665,9606.ENSP00000354813,9606.ENSP00000354876,9606.ENSP00000354961
Monarch HPO	HP:0000602	Ophthalmoplegia	0.00017	6	214	MT-CO1,MT-ATP6,MT-ND6,MT-ND5,MT-CO2,MT-ND4	9606.ENSP00000354499,9606.ENSP00000354632,9606.ENSP00000354665,9606.ENSP00000354813,9606.ENSP00000354876,9606.ENSP00000354961
Monarch HPO	HP:0001328	Specific learning disability	0.00017	6	214	MT-CO1,MT-ND6,MT-ND5,MT-CO2,MT-ND4,TCF4	9606.ENSP00000354499,9606.ENSP00000354665,9606.ENSP00000354813,9606.ENSP00000354876,9606.ENSP00000354961,9606.ENSP00000381382
Monarch HPO	HP:0000044	Hypogonadotropic hypogonadism	0.00018	5	119	MT-CO1,MT-ND6,MT-ND5,MT-CO2,MT-ND4	9606.ENSP00000354499,9606.ENSP00000354665,9606.ENSP00000354813,9606.ENSP00000354876,9606.ENSP00000354961
Monarch HPO	HP:0100660	Dyskinesia	0.0002	6	221	MT-ATP6,MT-ND6,MT-ND5,MT-ND4,MT-ND2,TCF4	9606.ENSP00000354632,9606.ENSP00000354665,9606.ENSP00000354813,9606.ENSP00000354961,9606.ENSP00000355046,9606.ENSP00000381382
Monarch HPO	HP:0000093	Proteinuria	0.00022	6	225	MT-CO1,MT-ND6,MT-ND5,MT-CO2,MT-ND4,MT-CO3	9606.ENSP00000354499,9606.ENSP00000354665,9606.ENSP00000354813,9606.ENSP00000354876,9606.ENSP00000354961,9606.ENSP00000354982
Monarch HPO	HP:0002352	Leukoencephalopathy	0.00022	6	224	MT-CO1,MT-ATP6,MT-CO2,MT-CO3,MT-ND2,TCF4	9606.ENSP00000354499,9606.ENSP00000354632,9606.ENSP00000354876,9606.ENSP00000354982,9606.ENSP00000355046,9606.ENSP00000381382
Monarch HPO	HP:0000708	Behavioral abnormality	0.00023	14	1891	CLIP2,PRDM8,MT-CO1,MT-CYB,MT-ATP6,MT-ND6,MT-ND5,MT-CO2,MT-ND4,MT-CO3,MT-ND2,POLH,TCF4,VIM	9606.ENSP00000223398,9606.ENSP00000339764,9606.ENSP00000354499,9606.ENSP00000354554,9606.ENSP00000354632,9606.ENSP00000354665,9606.ENSP00000354813,9606.ENSP00000354876,9606.ENSP00000354961,9606.ENSP00000354982,9606.ENSP00000355046,9606.ENSP00000361310,9606.ENSP00000381382,9606.ENSP00000446007
Monarch HPO	HP:0001399	Hepatic failure	0.00026	5	130	MT-ATP6,MT-ND6,MT-ND5,MT-ND4,MT-ND2	9606.ENSP00000354632,9606.ENSP00000354665,9606.ENSP00000354813,9606.ENSP00000354961,9606.ENSP00000355046
Monarch HPO	HP:0002315	Headache	0.00026	6	233	MT-CO1,MT-ATP6,MT-ND6,MT-ND5,MT-CO2,MT-ND4	9606.ENSP00000354499,9606.ENSP00000354632,9606.ENSP00000354665,9606.ENSP00000354813,9606.ENSP00000354876,9606.ENSP00000354961
Monarch HPO	HP:0012337	Abnormal homeostasis	0.00027	9	708	MT-CO1,MT-ATP6,MT-ND6,MT-ND5,MT-CO2,MT-ND4,MT-CO3,MT-ND2,TCF4	9606.ENSP00000354499,9606.ENSP00000354632,9606.ENSP00000354665,9606.ENSP00000354813,9606.ENSP00000354876,9606.ENSP00000354961,9606.ENSP00000354982,9606.ENSP00000355046,9606.ENSP00000381382
Monarch HPO	HP:0006565	Increased hepatocellular lipid droplets	0.00029	3	16	MT-CO1,MT-CO2,MT-CO3	9606.ENSP00000354499,9606.ENSP00000354876,9606.ENSP00000354982
Monarch HPO	HP:0001947	Renal tubular acidosis	0.00031	4	60	MT-CO1,MT-ATP6,MT-CO2,MT-CO3	9606.ENSP00000354499,9606.ENSP00000354632,9606.ENSP00000354876,9606.ENSP00000354982
Monarch HPO	HP:0002240	Hepatomegaly	0.00034	8	544	MT-CO1,MT-ATP6,MT-ND6,MT-ND5,MT-CO2,MT-ND4,MT-CO3,MT-ND2	9606.ENSP00000354499,9606.ENSP00000354632,9606.ENSP00000354665,9606.ENSP00000354813,9606.ENSP00000354876,9606.ENSP00000354961,9606.ENSP00000354982,9606.ENSP00000355046
Monarch HPO	HP:0001508	Failure to thrive	0.00038	10	950	MT-CO1,MT-ATP6,MT-ND6,MT-ND5,MT-CO2,MT-ND4,MT-CO3,MT-ND2,TCF4,FAM111A	9606.ENSP00000354499,9606.ENSP00000354632,9606.ENSP00000354665,9606.ENSP00000354813,9606.ENSP00000354876,9606.ENSP00000354961,9606.ENSP00000354982,9606.ENSP00000355046,9606.ENSP00000381382,9606.ENSP00000434435
Monarch HPO	HP:0005978	Type II diabetes mellitus	0.00041	5	145	MT-CO1,MT-ND6,MT-ND5,MT-CO2,MT-ND4	9606.ENSP00000354499,9606.ENSP00000354665,9606.ENSP00000354813,9606.ENSP00000354876,9606.ENSP00000354961
Monarch HPO	HP:0002120	Cerebral cortical atrophy	0.00044	6	259	MT-CO1,MT-ATP6,MT-ND6,MT-ND5,MT-CO2,MT-ND4	9606.ENSP00000354499,9606.ENSP00000354632,9606.ENSP00000354665,9606.ENSP00000354813,9606.ENSP00000354876,9606.ENSP00000354961
Monarch HPO	HP:0007359	Focal-onset seizure	0.0005	6	265	MT-CO1,MT-ND6,MT-ND5,MT-CO2,MT-ND4,TCF4	9606.ENSP00000354499,9606.ENSP00000354665,9606.ENSP00000354813,9606.ENSP00000354876,9606.ENSP00000354961,9606.ENSP00000381382
Monarch HPO	HP:0001274	Agenesis of corpus callosum	0.0006	6	274	MT-CO1,MT-ATP6,MT-ND6,MT-ND5,MT-CO2,MT-ND4	9606.ENSP00000354499,9606.ENSP00000354632,9606.ENSP00000354665,9606.ENSP00000354813,9606.ENSP00000354876,9606.ENSP00000354961
Monarch HPO	HP:0002019	Constipation	0.00066	6	279	MT-CO1,MT-ND6,MT-ND5,MT-CO2,MT-ND4,TCF4	9606.ENSP00000354499,9606.ENSP00000354665,9606.ENSP00000354813,9606.ENSP00000354876,9606.ENSP00000354961,9606.ENSP00000381382
Monarch HPO	HP:0002104	Apnea	0.00074	6	285	MT-ATP6,MT-ND6,MT-ND5,MT-ND4,MT-ND2,TCF4	9606.ENSP00000354632,9606.ENSP00000354665,9606.ENSP00000354813,9606.ENSP00000354961,9606.ENSP00000355046,9606.ENSP00000381382
Monarch HPO	HP:0001994	Renal Fanconi syndrome	0.00081	3	24	MT-CO1,MT-CO2,MT-CO3	9606.ENSP00000354499,9606.ENSP00000354876,9606.ENSP00000354982
Monarch HPO	HP:0003110	Abnormality of urine homeostasis	0.00099	8	638	MT-CO1,MT-ATP6,MT-ND6,MT-ND5,MT-CO2,MT-ND4,MT-CO3,MT-ND2	9606.ENSP00000354499,9606.ENSP00000354632,9606.ENSP00000354665,9606.ENSP00000354813,9606.ENSP00000354876,9606.ENSP00000354961,9606.ENSP00000354982,9606.ENSP00000355046
Monarch HPO	HP:0003688	Cytochrome C oxidase-negative muscle fibers	0.00099	3	26	MT-CO1,MT-CO2,MT-CO3	9606.ENSP00000354499,9606.ENSP00000354876,9606.ENSP00000354982
Monarch HPO	HP:0002079	Hypoplasia of the corpus callosum	0.0011	7	462	MT-CO1,MT-ATP6,MT-ND6,MT-ND5,MT-CO2,MT-ND4,TCF4	9606.ENSP00000354499,9606.ENSP00000354632,9606.ENSP00000354665,9606.ENSP00000354813,9606.ENSP00000354876,9606.ENSP00000354961,9606.ENSP00000381382
Monarch HPO	HP:0011344	Severe global developmental delay	0.0011	5	182	MT-ATP6,MT-ND6,MT-ND5,MT-ND4,MT-ND2	9606.ENSP00000354632,9606.ENSP00000354665,9606.ENSP00000354813,9606.ENSP00000354961,9606.ENSP00000355046
Monarch HPO	HP:0000517	Abnormality of the lens	0.0012	8	660	MT-CO1,MT-ATP6,MT-ND6,MT-ND5,MT-CO2,MT-ND4,FAM111A,VIM	9606.ENSP00000354499,9606.ENSP00000354632,9606.ENSP00000354665,9606.ENSP00000354813,9606.ENSP00000354876,9606.ENSP00000354961,9606.ENSP00000434435,9606.ENSP00000446007
Monarch HPO	HP:0001000	Abnormality of skin pigmentation	0.0013	6	316	MT-CO1,MT-ND6,MT-ND5,MT-CO2,MT-ND4,POLH	9606.ENSP00000354499,9606.ENSP00000354665,9606.ENSP00000354813,9606.ENSP00000354876,9606.ENSP00000354961,9606.ENSP00000361310
Monarch HPO	HP:0012240	Increased intramyocellular lipid droplets	0.0015	3	31	MT-CO1,MT-CO2,MT-CO3	9606.ENSP00000354499,9606.ENSP00000354876,9606.ENSP00000354982
Monarch HPO	HP:0008947	Infantile muscular hypotonia	0.0016	5	197	MT-ATP6,MT-ND6,MT-ND5,MT-ND4,MT-ND2	9606.ENSP00000354632,9606.ENSP00000354665,9606.ENSP00000354813,9606.ENSP00000354961,9606.ENSP00000355046
Monarch HPO	HP:0012447	Abnormal myelination	0.0017	7	502	MT-CO1,MT-ATP6,MT-ND6,MT-ND5,MT-CO2,MT-ND4,MT-ND2	9606.ENSP00000354499,9606.ENSP00000354632,9606.ENSP00000354665,9606.ENSP00000354813,9606.ENSP00000354876,9606.ENSP00000354961,9606.ENSP00000355046
Monarch HPO	HP:0012372	Abnormal eye morphology	0.0018	9	916	MT-CYB,MT-ATP6,MT-ND6,MT-ND5,MT-ND4,MT-CO3,MT-ND2,POLH,FAM111A	9606.ENSP00000354554,9606.ENSP00000354632,9606.ENSP00000354665,9606.ENSP00000354813,9606.ENSP00000354961,9606.ENSP00000354982,9606.ENSP00000355046,9606.ENSP00000361310,9606.ENSP00000434435
Monarch HPO	HP:0000510	Rod-cone dystrophy	0.0027	5	222	MT-ATP6,MT-ND6,MT-ND5,MT-ND4,MT-ND2	9606.ENSP00000354632,9606.ENSP00000354665,9606.ENSP00000354813,9606.ENSP00000354961,9606.ENSP00000355046
Monarch HPO	HP:0000407	Sensorineural hearing impairment	0.0029	8	754	MT-CO1,MT-ATP6,MT-ND6,MT-ND5,MT-CO2,MT-ND4,MT-CO3,MT-ND2	9606.ENSP00000354499,9606.ENSP00000354632,9606.ENSP00000354665,9606.ENSP00000354813,9606.ENSP00000354876,9606.ENSP00000354961,9606.ENSP00000354982,9606.ENSP00000355046
Monarch HPO	HP:0003109	Hyperphosphaturia	0.003	3	40	MT-CO1,MT-CO2,MT-CO3	9606.ENSP00000354499,9606.ENSP00000354876,9606.ENSP00000354982
Monarch HPO	HP:0003355	Aminoaciduria	0.0033	4	118	MT-CO1,MT-ATP6,MT-CO2,MT-CO3	9606.ENSP00000354499,9606.ENSP00000354632,9606.ENSP00000354876,9606.ENSP00000354982
Monarch HPO	HP:0000821	Hypothyroidism	0.0037	5	239	MT-CO1,MT-ND6,MT-ND5,MT-CO2,MT-ND4	9606.ENSP00000354499,9606.ENSP00000354665,9606.ENSP00000354813,9606.ENSP00000354876,9606.ENSP00000354961
Monarch HPO	HP:0000822	Hypertension	0.0049	5	256	MT-CO1,MT-ND6,MT-ND5,MT-CO2,MT-ND4	9606.ENSP00000354499,9606.ENSP00000354665,9606.ENSP00000354813,9606.ENSP00000354876,9606.ENSP00000354961
Monarch HPO	HP:0002015	Dysphagia	0.0049	6	414	MT-ATP6,MT-ND6,MT-ND5,MT-ND4,MT-ND2,TCF4	9606.ENSP00000354632,9606.ENSP00000354665,9606.ENSP00000354813,9606.ENSP00000354961,9606.ENSP00000355046,9606.ENSP00000381382
Monarch HPO	HP:0002059	Cerebral atrophy	0.0049	7	603	MT-CO1,MT-ATP6,MT-ND6,MT-ND5,MT-CO2,MT-ND4,TCF4	9606.ENSP00000354499,9606.ENSP00000354632,9606.ENSP00000354665,9606.ENSP00000354813,9606.ENSP00000354876,9606.ENSP00000354961,9606.ENSP00000381382
Monarch HPO	HP:0001250	Seizure	0.0052	11	1606	PRDM8,MT-CO1,MT-ATP6,MT-ND6,MT-ND5,MT-CO2,MT-ND4,MT-CO3,MT-ND2,TCF4,FAM111A	9606.ENSP00000339764,9606.ENSP00000354499,9606.ENSP00000354632,9606.ENSP00000354665,9606.ENSP00000354813,9606.ENSP00000354876,9606.ENSP00000354961,9606.ENSP00000354982,9606.ENSP00000355046,9606.ENSP00000381382,9606.ENSP00000434435
Monarch HPO	HP:0002012	Abnormality of the abdominal organs	0.0054	9	1069	MT-CO1,MT-ATP6,MT-ND6,MT-ND5,MT-CO2,MT-ND4,MT-CO3,MT-ND2,FAM111A	9606.ENSP00000354499,9606.ENSP00000354632,9606.ENSP00000354665,9606.ENSP00000354813,9606.ENSP00000354876,9606.ENSP00000354961,9606.ENSP00000354982,9606.ENSP00000355046,9606.ENSP00000434435
Monarch HPO	HP:0012719	Functional abnormality of the gastrointestinal tract	0.0061	8	845	MT-CO1,MT-ATP6,MT-ND6,MT-ND5,MT-CO2,MT-ND4,MT-ND2,TCF4	9606.ENSP00000354499,9606.ENSP00000354632,9606.ENSP00000354665,9606.ENSP00000354813,9606.ENSP00000354876,9606.ENSP00000354961,9606.ENSP00000355046,9606.ENSP00000381382
Monarch HPO	HP:0000716	Depression	0.0065	5	274	MT-CO1,MT-ND6,MT-ND5,MT-CO2,MT-ND4	9606.ENSP00000354499,9606.ENSP00000354665,9606.ENSP00000354813,9606.ENSP00000354876,9606.ENSP00000354961
Monarch HPO	HP:0000739	Anxiety	0.0065	5	274	MT-CO1,MT-ND6,MT-ND5,MT-CO2,MT-ND4	9606.ENSP00000354499,9606.ENSP00000354665,9606.ENSP00000354813,9606.ENSP00000354876,9606.ENSP00000354961
Monarch HPO	HP:0011121	Abnormality of skin morphology	0.0065	11	1649	MT-CO1,MT-CYB,MT-ATP6,MT-ND6,MT-ND5,MT-CO2,MT-ND4,MT-CO3,MT-ND2,POLH,TCF4	9606.ENSP00000354499,9606.ENSP00000354554,9606.ENSP00000354632,9606.ENSP00000354665,9606.ENSP00000354813,9606.ENSP00000354876,9606.ENSP00000354961,9606.ENSP00000354982,9606.ENSP00000355046,9606.ENSP00000361310,9606.ENSP00000381382
Monarch HPO	HP:0002353	EEG abnormality	0.0066	6	440	MT-CO1,MT-ATP6,MT-ND6,MT-ND5,MT-CO2,MT-ND4	9606.ENSP00000354499,9606.ENSP00000354632,9606.ENSP00000354665,9606.ENSP00000354813,9606.ENSP00000354876,9606.ENSP00000354961
Monarch HPO	HP:0001324	Muscle weakness	0.0068	8	862	MT-CO1,MT-ATP6,MT-ND6,MT-ND5,MT-CO2,MT-ND4,MT-CO3,MT-ND2	9606.ENSP00000354499,9606.ENSP00000354632,9606.ENSP00000354665,9606.ENSP00000354813,9606.ENSP00000354876,9606.ENSP00000354961,9606.ENSP00000354982,9606.ENSP00000355046
Monarch HPO	HP:0003076	Glycosuria	0.0068	3	55	MT-CO1,MT-CO2,MT-CO3	9606.ENSP00000354499,9606.ENSP00000354876,9606.ENSP00000354982
Monarch HPO	HP:0002597	Abnormality of the vasculature	0.0072	11	1673	MT-CO1,MT-CYB,MT-ATP6,MT-ND6,MT-ND5,MT-CO2,MT-ND4,MT-CO3,MT-ND2,POLH,FAM111A	9606.ENSP00000354499,9606.ENSP00000354554,9606.ENSP00000354632,9606.ENSP00000354665,9606.ENSP00000354813,9606.ENSP00000354876,9606.ENSP00000354961,9606.ENSP00000354982,9606.ENSP00000355046,9606.ENSP00000361310,9606.ENSP00000434435
Monarch HPO	HP:0001270	Motor delay	0.0092	7	674	MT-CO1,MT-ND6,MT-ND5,MT-CO2,MT-ND4,MT-CO3,TCF4	9606.ENSP00000354499,9606.ENSP00000354665,9606.ENSP00000354813,9606.ENSP00000354876,9606.ENSP00000354961,9606.ENSP00000354982,9606.ENSP00000381382
Monarch HPO	HP:0002376	Developmental regression	0.0103	5	306	MT-ATP6,MT-ND6,MT-ND5,MT-ND4,MT-ND2	9606.ENSP00000354632,9606.ENSP00000354665,9606.ENSP00000354813,9606.ENSP00000354961,9606.ENSP00000355046
Monarch HPO	HP:0002014	Diarrhea	0.0105	5	308	MT-CO1,MT-ND6,MT-ND5,MT-CO2,MT-ND4	9606.ENSP00000354499,9606.ENSP00000354665,9606.ENSP00000354813,9606.ENSP00000354876,9606.ENSP00000354961
Monarch HPO	HP:0012373	Abnormal eye physiology	0.0113	9	1195	MT-CO1,MT-ATP6,MT-ND6,MT-ND5,MT-CO2,MT-ND4,MT-CO3,MT-ND2,POLH	9606.ENSP00000354499,9606.ENSP00000354632,9606.ENSP00000354665,9606.ENSP00000354813,9606.ENSP00000354876,9606.ENSP00000354961,9606.ENSP00000354982,9606.ENSP00000355046,9606.ENSP00000361310
Monarch HPO	HP:0012638	Abnormal nervous system physiology	0.0123	15	3153	CLIP2,PRDM8,MT-CO1,MT-CYB,MT-ATP6,MT-ND6,MT-ND5,MT-CO2,MT-ND4,MT-CO3,MT-ND2,POLH,TCF4,FAM111A,VIM	9606.ENSP00000223398,9606.ENSP00000339764,9606.ENSP00000354499,9606.ENSP00000354554,9606.ENSP00000354632,9606.ENSP00000354665,9606.ENSP00000354813,9606.ENSP00000354876,9606.ENSP00000354961,9606.ENSP00000354982,9606.ENSP00000355046,9606.ENSP00000361310,9606.ENSP00000381382,9606.ENSP00000434435,9606.ENSP00000446007
Monarch HPO	HP:0001871	Abnormality of blood and blood-forming tissues	0.0127	9	1216	MT-CO1,MT-ATP6,MT-ND6,MT-ND5,MT-CO2,MT-ND4,MT-CO3,TCF4,FAM111A	9606.ENSP00000354499,9606.ENSP00000354632,9606.ENSP00000354665,9606.ENSP00000354813,9606.ENSP00000354876,9606.ENSP00000354961,9606.ENSP00000354982,9606.ENSP00000381382,9606.ENSP00000434435
Monarch HPO	HP:0001288	Gait disturbance	0.0129	8	958	MT-CO1,MT-ATP6,MT-ND6,MT-ND5,MT-CO2,MT-ND4,MT-ND2,TCF4	9606.ENSP00000354499,9606.ENSP00000354632,9606.ENSP00000354665,9606.ENSP00000354813,9606.ENSP00000354876,9606.ENSP00000354961,9606.ENSP00000355046,9606.ENSP00000381382
Monarch HPO	HP:0000234	Abnormality of the head	0.016	14	2868	REST,MT-CO1,MT-CYB,MT-ATP6,MT-ND6,MT-ND5,MT-CO2,MT-ND4,MT-CO3,MT-ND2,MAPKAPK2,POLH,TCF4,FAM111A	9606.ENSP00000311816,9606.ENSP00000354499,9606.ENSP00000354554,9606.ENSP00000354632,9606.ENSP00000354665,9606.ENSP00000354813,9606.ENSP00000354876,9606.ENSP00000354961,9606.ENSP00000354982,9606.ENSP00000355046,9606.ENSP00000356070,9606.ENSP00000361310,9606.ENSP00000381382,9606.ENSP00000434435
Monarch HPO	HP:0100022	Abnormality of movement	0.0161	11	1854	PRDM8,MT-CO1,MT-CYB,MT-ATP6,MT-ND6,MT-ND5,MT-CO2,MT-ND4,MT-CO3,MT-ND2,TCF4	9606.ENSP00000339764,9606.ENSP00000354499,9606.ENSP00000354554,9606.ENSP00000354632,9606.ENSP00000354665,9606.ENSP00000354813,9606.ENSP00000354876,9606.ENSP00000354961,9606.ENSP00000354982,9606.ENSP00000355046,9606.ENSP00000381382
Monarch HPO	HP:0001263	Global developmental delay	0.0169	10	1559	MT-CO1,MT-ATP6,MT-ND6,MT-ND5,MT-CO2,MT-ND4,MT-CO3,MT-ND2,TCF4,FAM111A	9606.ENSP00000354499,9606.ENSP00000354632,9606.ENSP00000354665,9606.ENSP00000354813,9606.ENSP00000354876,9606.ENSP00000354961,9606.ENSP00000354982,9606.ENSP00000355046,9606.ENSP00000381382,9606.ENSP00000434435
Monarch HPO	HP:0001265	Hyporeflexia	0.018	5	352	MT-ATP6,MT-ND6,MT-ND5,MT-ND4,MT-ND2	9606.ENSP00000354632,9606.ENSP00000354665,9606.ENSP00000354813,9606.ENSP00000354961,9606.ENSP00000355046
Monarch HPO	HP:0002875	Exertional dyspnea	0.0194	3	83	MT-CO1,MT-CO2,MT-CO3	9606.ENSP00000354499,9606.ENSP00000354876,9606.ENSP00000354982
Monarch HPO	HP:0000736	Short attention span	0.0224	5	371	MT-CO1,MT-ND6,MT-ND5,MT-CO2,MT-ND4	9606.ENSP00000354499,9606.ENSP00000354665,9606.ENSP00000354813,9606.ENSP00000354876,9606.ENSP00000354961
Monarch HPO	HP:0000818	Abnormality of the endocrine system	0.0253	8	1071	MT-CO1,MT-ATP6,MT-ND6,MT-ND5,MT-CO2,MT-ND4,MT-ND2,FAM111A	9606.ENSP00000354499,9606.ENSP00000354632,9606.ENSP00000354665,9606.ENSP00000354813,9606.ENSP00000354876,9606.ENSP00000354961,9606.ENSP00000355046,9606.ENSP00000434435
Monarch HPO	HP:0002747	Respiratory insufficiency due to muscle weakness	0.0325	3	101	MT-CO1,MT-CO2,MT-CO3	9606.ENSP00000354499,9606.ENSP00000354876,9606.ENSP00000354982
Monarch HPO	HP:0004322	Short stature	0.0401	8	1154	MT-CO1,MT-ATP6,MT-ND6,MT-ND5,MT-CO2,MT-ND4,TCF4,FAM111A	9606.ENSP00000354499,9606.ENSP00000354632,9606.ENSP00000354665,9606.ENSP00000354813,9606.ENSP00000354876,9606.ENSP00000354961,9606.ENSP00000381382,9606.ENSP00000434435
Monarch HPO	HP:0001347	Hyperreflexia	0.0405	6	643	PRDM8,MT-ATP6,MT-ND6,MT-ND5,MT-ND4,MT-ND2	9606.ENSP00000339764,9606.ENSP00000354632,9606.ENSP00000354665,9606.ENSP00000354813,9606.ENSP00000354961,9606.ENSP00000355046
Monarch HPO	HP:0001257	Spasticity	0.0427	7	896	PRDM8,MT-ATP6,MT-ND6,MT-ND5,MT-ND4,MT-ND2,TCF4	9606.ENSP00000339764,9606.ENSP00000354632,9606.ENSP00000354665,9606.ENSP00000354813,9606.ENSP00000354961,9606.ENSP00000355046,9606.ENSP00000381382
Monarch HPO	HP:0003808	Abnormal muscle tone	0.043	10	1773	PRDM8,MT-CO1,MT-ATP6,MT-ND6,MT-ND5,MT-CO2,MT-ND4,MT-CO3,MT-ND2,TCF4	9606.ENSP00000339764,9606.ENSP00000354499,9606.ENSP00000354632,9606.ENSP00000354665,9606.ENSP00000354813,9606.ENSP00000354876,9606.ENSP00000354961,9606.ENSP00000354982,9606.ENSP00000355046,9606.ENSP00000381382
Monarch HPO	HP:0030680	Abnormality of cardiovascular system morphology	0.0485	9	1488	MT-CO1,MT-CYB,MT-ATP6,MT-ND6,MT-ND5,MT-CO2,MT-ND4,MT-CO3,MT-ND2	9606.ENSP00000354499,9606.ENSP00000354554,9606.ENSP00000354632,9606.ENSP00000354665,9606.ENSP00000354813,9606.ENSP00000354876,9606.ENSP00000354961,9606.ENSP00000354982,9606.ENSP00000355046
DISEASES	DOID:705	Leber hereditary optic neuropathy	2.33e-14	8	11	MT-CO1,MT-CYB,MT-ATP6,MT-ND6,MT-ND5,MT-ND4,MT-CO3,MT-ND2	9606.ENSP00000354499,9606.ENSP00000354554,9606.ENSP00000354632,9606.ENSP00000354665,9606.ENSP00000354813,9606.ENSP00000354961,9606.ENSP00000354982,9606.ENSP00000355046
DISEASES	DOID:700	Mitochondrial metabolism disease	4.56e-08	9	173	MT-CO1,MT-CYB,MT-ATP6,MT-ND6,MT-ND5,MT-CO2,MT-ND4,MT-CO3,MT-ND2	9606.ENSP00000354499,9606.ENSP00000354554,9606.ENSP00000354632,9606.ENSP00000354665,9606.ENSP00000354813,9606.ENSP00000354876,9606.ENSP00000354961,9606.ENSP00000354982,9606.ENSP00000355046
DISEASES	DOID:3652	Leigh disease	6.01e-06	6	72	MT-ATP6,MT-ND6,MT-ND5,MT-ND4,MT-CO3,MT-ND2	9606.ENSP00000354632,9606.ENSP00000354665,9606.ENSP00000354813,9606.ENSP00000354961,9606.ENSP00000354982,9606.ENSP00000355046
DISEASES	DOID:699	Mitochondrial myopathy	0.00011	4	23	MT-ATP6,MT-ND6,MT-ND5,MT-ND4	9606.ENSP00000354632,9606.ENSP00000354665,9606.ENSP00000354813,9606.ENSP00000354961
DISEASES	DOID:3687	MELAS syndrome	0.00012	3	4	MT-ND6,MT-ND5,MT-ND4	9606.ENSP00000354665,9606.ENSP00000354813,9606.ENSP00000354961
DISEASES	DOID:863	Nervous system disease	0.00022	16	2132	REST,PRDM8,MT-CO1,MT-CYB,MT-ATP6,MT-ND6,MT-ND5,MT-CO2,MT-ND4,MT-CO3,MT-ND2,RPL39,LTB4R,TCF4,FAM111A,VIM	9606.ENSP00000311816,9606.ENSP00000339764,9606.ENSP00000354499,9606.ENSP00000354554,9606.ENSP00000354632,9606.ENSP00000354665,9606.ENSP00000354813,9606.ENSP00000354876,9606.ENSP00000354961,9606.ENSP00000354982,9606.ENSP00000355046,9606.ENSP00000355315,9606.ENSP00000380008,9606.ENSP00000381382,9606.ENSP00000434435,9606.ENSP00000446007
DISEASES	DOID:0060536	Mitochondrial complex i deficiency	0.00055	4	41	MT-ND6,MT-ND5,MT-ND4,MT-ND2	9606.ENSP00000354665,9606.ENSP00000354813,9606.ENSP00000354961,9606.ENSP00000355046
DISEASES	DOID:0050155	Sensory system disease	0.0015	10	887	REST,MT-CO1,MT-CYB,MT-ATP6,MT-CO2,RPL39,LTB4R,TCF4,FAM111A,VIM	9606.ENSP00000311816,9606.ENSP00000354499,9606.ENSP00000354554,9606.ENSP00000354632,9606.ENSP00000354876,9606.ENSP00000355315,9606.ENSP00000380008,9606.ENSP00000381382,9606.ENSP00000434435,9606.ENSP00000446007
DISEASES	DOID:5614	Eye disease	0.0019	9	715	MT-CO1,MT-CYB,MT-ATP6,MT-CO2,RPL39,LTB4R,TCF4,FAM111A,VIM	9606.ENSP00000354499,9606.ENSP00000354554,9606.ENSP00000354632,9606.ENSP00000354876,9606.ENSP00000355315,9606.ENSP00000380008,9606.ENSP00000381382,9606.ENSP00000434435,9606.ENSP00000446007
DISEASES	DOID:1398	Parasitic infectious disease	0.002	4	62	MT-CO1,MT-CYB,MT-ND6,MT-CO2	9606.ENSP00000354499,9606.ENSP00000354554,9606.ENSP00000354665,9606.ENSP00000354876
DISEASES	DOID:3762	Cytochrome-c oxidase deficiency disease	0.0036	3	22	MT-CO1,MT-CO2,MT-CO3	9606.ENSP00000354499,9606.ENSP00000354876,9606.ENSP00000354982
DISEASES	DOID:7	Disease of anatomical entity	0.0086	20	4452	C21orf58,ZYG11B,REST,PRDM8,MT-CO1,MT-CYB,MT-ATP6,MT-ND6,MT-ND5,MT-CO2,MT-ND4,MT-CO3,MT-ND2,MT-ATP8,RPL39,POLH,LTB4R,TCF4,FAM111A,VIM	9606.ENSP00000291691,9606.ENSP00000294353,9606.ENSP00000311816,9606.ENSP00000339764,9606.ENSP00000354499,9606.ENSP00000354554,9606.ENSP00000354632,9606.ENSP00000354665,9606.ENSP00000354813,9606.ENSP00000354876,9606.ENSP00000354961,9606.ENSP00000354982,9606.ENSP00000355046,9606.ENSP00000355265,9606.ENSP00000355315,9606.ENSP00000361310,9606.ENSP00000380008,9606.ENSP00000381382,9606.ENSP00000434435,…
DISEASES	DOID:883	Parasitic helminthiasis infectious disease	0.0086	3	31	MT-CO1,MT-ND6,MT-CO2	9606.ENSP00000354499,9606.ENSP00000354665,9606.ENSP00000354876
DISEASES	DOID:0080000	Muscular disease	0.0248	5	254	MT-CO1,MT-ATP6,MT-ND6,MT-ND5,MT-ND4	9606.ENSP00000354499,9606.ENSP00000354632,9606.ENSP00000354665,9606.ENSP00000354813,9606.ENSP00000354961
DISEASES	DOID:114	Heart disease	0.025	5	257	ZYG11B,MT-CO1,MT-CYB,MT-ATP6,MT-ATP8	9606.ENSP00000294353,9606.ENSP00000354499,9606.ENSP00000354554,9606.ENSP00000354632,9606.ENSP00000355265
DISEASES	DOID:0050700	Cardiomyopathy	0.0348	4	147	ZYG11B,MT-CYB,MT-ATP6,MT-ATP8	9606.ENSP00000294353,9606.ENSP00000354554,9606.ENSP00000354632,9606.ENSP00000355265
DISEASES	DOID:480	Movement disease	0.0475	3	63	MT-ND6,MT-ND4,VIM	9606.ENSP00000354665,9606.ENSP00000354961,9606.ENSP00000446007
TISSUES	BTO:0000199	Cardiac muscle	1.91e-13	10	64	MT-CO1,MT-CYB,MT-ATP6,MT-ND6,MT-ND5,MT-CO2,MT-ND4,MT-CO3,MT-ND2,MT-ATP8	9606.ENSP00000354499,9606.ENSP00000354554,9606.ENSP00000354632,9606.ENSP00000354665,9606.ENSP00000354813,9606.ENSP00000354876,9606.ENSP00000354961,9606.ENSP00000354982,9606.ENSP00000355046,9606.ENSP00000355265
TISSUES	BTO:0000266	Cob	2.19e-08	5	8	MT-ATP6,MT-ND6,MT-ND5,MT-ND4,MT-ATP8	9606.ENSP00000354632,9606.ENSP00000354665,9606.ENSP00000354813,9606.ENSP00000354961,9606.ENSP00000355265
TISSUES	BTO:0000562	Heart	1.22e-07	13	695	CLIP2,MT-CO1,MT-CYB,MT-ATP6,MT-ND6,MT-ND5,MT-CO2,MT-ND4,MT-CO3,MT-ND2,MT-ATP8,RPL39,VIM	9606.ENSP00000223398,9606.ENSP00000354499,9606.ENSP00000354554,9606.ENSP00000354632,9606.ENSP00000354665,9606.ENSP00000354813,9606.ENSP00000354876,9606.ENSP00000354961,9606.ENSP00000354982,9606.ENSP00000355046,9606.ENSP00000355265,9606.ENSP00000355315,9606.ENSP00000446007
TISSUES	BTO:0000084	Vermiform appendix	2.26e-07	5	18	MT-CO1,MT-CYB,MT-CO2,MT-ND4,MT-ATP8	9606.ENSP00000354499,9606.ENSP00000354554,9606.ENSP00000354876,9606.ENSP00000354961,9606.ENSP00000355265
TISSUES	BTO:0001461	Whole plant	3.08e-07	8	165	SUB1,MT-CO1,MT-CYB,MT-ATP6,MT-ND6,MT-ND5,MT-ND4,MT-ATP8	9606.ENSP00000265073,9606.ENSP00000354499,9606.ENSP00000354554,9606.ENSP00000354632,9606.ENSP00000354665,9606.ENSP00000354813,9606.ENSP00000354961,9606.ENSP00000355265
TISSUES	BTO:0001369	Vertebrate muscular system	1.2e-06	12	725	PRDM8,MT-CO1,MT-CYB,MT-ATP6,MT-ND6,MT-ND5,MT-CO2,MT-ND4,MT-CO3,MT-ND2,MT-ATP8,C14orf2	9606.ENSP00000339764,9606.ENSP00000354499,9606.ENSP00000354554,9606.ENSP00000354632,9606.ENSP00000354665,9606.ENSP00000354813,9606.ENSP00000354876,9606.ENSP00000354961,9606.ENSP00000354982,9606.ENSP00000355046,9606.ENSP00000355265,9606.ENSP00000401770
TISSUES	BTO:0002273	Ileocecum	2.06e-06	6	78	MT-CO1,MT-CYB,MT-CO2,MT-ND4,MT-ATP8,FAM111A	9606.ENSP00000354499,9606.ENSP00000354554,9606.ENSP00000354876,9606.ENSP00000354961,9606.ENSP00000355265,9606.ENSP00000434435
TISSUES	BTO:0002149	Gill raker	0.0025	2	2	MT-CO1,MT-CYB	9606.ENSP00000354499,9606.ENSP00000354554
TISSUES	BTO:0004650	Dorsal fin	0.0025	2	2	MT-CO1,MT-CYB	9606.ENSP00000354499,9606.ENSP00000354554
TISSUES	BTO:0004652	Anal fin	0.0025	2	2	MT-CO1,MT-CYB	9606.ENSP00000354499,9606.ENSP00000354554
TISSUES	BTO:0005512	Basal node	0.0025	2	2	MT-CO1,MT-CYB	9606.ENSP00000354499,9606.ENSP00000354554
TISSUES	BTO:0006190	Cybrid cell	0.0025	2	2	MT-ND6,MT-ND4	9606.ENSP00000354665,9606.ENSP00000354961
TISSUES	BTO:0003099	Internal female genital organ	0.003	15	2593	SUB1,REST,MT-CO1,MT-CYB,MT-ATP6,MT-ND6,MT-ND5,MT-CO2,MT-ND2,MT-ATP8,EMILIN1,ERBB2IP,FAM111A,CAND1,VIM	9606.ENSP00000265073,9606.ENSP00000311816,9606.ENSP00000354499,9606.ENSP00000354554,9606.ENSP00000354632,9606.ENSP00000354665,9606.ENSP00000354813,9606.ENSP00000354876,9606.ENSP00000355046,9606.ENSP00000355265,9606.ENSP00000369677,9606.ENSP00000426632,9606.ENSP00000434435,9606.ENSP00000442318,9606.ENSP00000446007
TISSUES	BTO:0001078	Placenta	0.0039	10	1176	MT-CO1,MT-CYB,MT-ATP6,MT-ND6,MT-ND5,MT-CO2,MT-ND2,MT-ATP8,CAND1,VIM	9606.ENSP00000354499,9606.ENSP00000354554,9606.ENSP00000354632,9606.ENSP00000354665,9606.ENSP00000354813,9606.ENSP00000354876,9606.ENSP00000355046,9606.ENSP00000355265,9606.ENSP00000442318,9606.ENSP00000446007
TISSUES	BTO:0000081	Reproductive system	0.0257	22	6107	SUB1,ZYG11B,HMGB2,REST,MT-CO1,MT-CYB,MT-ATP6,MT-ND6,MT-ND5,MT-CO2,MT-ND2,MT-ATP8,RPL39,MAPKAPK2,UFL1,EMILIN1,MAP3K2,MGAT1,ERBB2IP,FAM111A,CAND1,VIM	9606.ENSP00000265073,9606.ENSP00000294353,9606.ENSP00000296503,9606.ENSP00000311816,9606.ENSP00000354499,9606.ENSP00000354554,9606.ENSP00000354632,9606.ENSP00000354665,9606.ENSP00000354813,9606.ENSP00000354876,9606.ENSP00000355046,9606.ENSP00000355265,9606.ENSP00000355315,9606.ENSP00000356070,9606.ENSP00000358283,9606.ENSP00000369677,9606.ENSP00000387246,9606.ENSP00000404718,9606.ENSP00000426632,…
TISSUES	BTO:0001243	Shoot	0.028	3	74	SUB1,MT-CO1,MT-CYB	9606.ENSP00000265073,9606.ENSP00000354499,9606.ENSP00000354554
TISSUES	BTO:0003091	Urogenital system	0.0332	23	6716	SUB1,ZYG11B,HMGB2,REST,MT-CO1,MT-CYB,MT-ATP6,MT-ND6,MT-ND5,MT-CO2,MT-ND2,MT-ATP8,RPL39,MAPKAPK2,CRTC2,UFL1,EMILIN1,MAP3K2,MGAT1,ERBB2IP,FAM111A,CAND1,VIM	9606.ENSP00000265073,9606.ENSP00000294353,9606.ENSP00000296503,9606.ENSP00000311816,9606.ENSP00000354499,9606.ENSP00000354554,9606.ENSP00000354632,9606.ENSP00000354665,9606.ENSP00000354813,9606.ENSP00000354876,9606.ENSP00000355046,9606.ENSP00000355265,9606.ENSP00000355315,9606.ENSP00000356070,9606.ENSP00000357622,9606.ENSP00000358283,9606.ENSP00000369677,9606.ENSP00000387246,9606.ENSP00000404718,…
TISSUES	BTO:0000042	Animal	0.0334	36	14895	ADCK2,CLIP2,SLC16A7,SUB1,ZYG11B,HMGB2,REST,PRDM8,MT-CO1,MT-CYB,MT-ATP6,MT-ND6,MT-ND5,MT-CO2,MT-ND4,MT-CO3,MT-ND2,MT-ATP8,RPL39,MAPKAPK2,CRTC2,UFL1,PSRC1,POLH,SLC38A10,EMILIN1,LTB4R,TCF4,MAP3K2,C14orf2,MGAT1,CNEP1R1,ERBB2IP,FAM111A,CAND1,VIM	9606.ENSP00000072869,9606.ENSP00000223398,9606.ENSP00000261187,9606.ENSP00000265073,9606.ENSP00000294353,9606.ENSP00000296503,9606.ENSP00000311816,9606.ENSP00000339764,9606.ENSP00000354499,9606.ENSP00000354554,9606.ENSP00000354632,9606.ENSP00000354665,9606.ENSP00000354813,9606.ENSP00000354876,9606.ENSP00000354961,9606.ENSP00000354982,9606.ENSP00000355046,9606.ENSP00000355265,9606.ENSP00000355315,…
TISSUES	BTO:0000083	Female reproductive system	0.0334	21	5799	SUB1,ZYG11B,HMGB2,REST,MT-CO1,MT-CYB,MT-ATP6,MT-ND6,MT-ND5,MT-CO2,MT-ND2,MT-ATP8,MAPKAPK2,UFL1,EMILIN1,MAP3K2,MGAT1,ERBB2IP,FAM111A,CAND1,VIM	9606.ENSP00000265073,9606.ENSP00000294353,9606.ENSP00000296503,9606.ENSP00000311816,9606.ENSP00000354499,9606.ENSP00000354554,9606.ENSP00000354632,9606.ENSP00000354665,9606.ENSP00000354813,9606.ENSP00000354876,9606.ENSP00000355046,9606.ENSP00000355265,9606.ENSP00000356070,9606.ENSP00000358283,9606.ENSP00000369677,9606.ENSP00000387246,9606.ENSP00000404718,9606.ENSP00000426632,9606.ENSP00000434435,…
TISSUES	BTO:0001489	Whole body	0.0396	33	12619	CLIP2,SUB1,ZYG11B,HMGB2,REST,PRDM8,MT-CO1,MT-CYB,MT-ATP6,MT-ND6,MT-ND5,MT-CO2,MT-ND4,MT-CO3,MT-ND2,MT-ATP8,RPL39,MAPKAPK2,CRTC2,UFL1,PSRC1,SLC38A10,EMILIN1,LTB4R,TCF4,MAP3K2,C14orf2,MGAT1,CNEP1R1,ERBB2IP,FAM111A,CAND1,VIM	9606.ENSP00000223398,9606.ENSP00000265073,9606.ENSP00000294353,9606.ENSP00000296503,9606.ENSP00000311816,9606.ENSP00000339764,9606.ENSP00000354499,9606.ENSP00000354554,9606.ENSP00000354632,9606.ENSP00000354665,9606.ENSP00000354813,9606.ENSP00000354876,9606.ENSP00000354961,9606.ENSP00000354982,9606.ENSP00000355046,9606.ENSP00000355265,9606.ENSP00000355315,9606.ENSP00000356070,9606.ENSP00000357622,…
COMPARTMENTS	GOCC:0000262	Mitochondrial chromosome	3.13e-16	9	15	MT-CO1,MT-CYB,MT-ATP6,MT-ND6,MT-ND5,MT-CO2,MT-ND4,MT-ND2,MT-ATP8	9606.ENSP00000354499,9606.ENSP00000354554,9606.ENSP00000354632,9606.ENSP00000354665,9606.ENSP00000354813,9606.ENSP00000354876,9606.ENSP00000354961,9606.ENSP00000355046,9606.ENSP00000355265
COMPARTMENTS	GOCC:0005743	Mitochondrial inner membrane	2.16e-10	12	314	MT-CO1,MT-CYB,MT-ATP6,MT-ND6,MT-ND5,MT-CO2,MT-ND4,MT-CO3,MT-ND2,MT-ATP8,C14orf2,VIM	9606.ENSP00000354499,9606.ENSP00000354554,9606.ENSP00000354632,9606.ENSP00000354665,9606.ENSP00000354813,9606.ENSP00000354876,9606.ENSP00000354961,9606.ENSP00000354982,9606.ENSP00000355046,9606.ENSP00000355265,9606.ENSP00000401770,9606.ENSP00000446007
COMPARTMENTS	GOCC:0070469	Respirasome	2.72e-09	8	88	MT-CO1,MT-CYB,MT-ND6,MT-ND5,MT-CO2,MT-ND4,MT-CO3,MT-ND2	9606.ENSP00000354499,9606.ENSP00000354554,9606.ENSP00000354665,9606.ENSP00000354813,9606.ENSP00000354876,9606.ENSP00000354961,9606.ENSP00000354982,9606.ENSP00000355046
COMPARTMENTS	GOCC:0098800	Inner mitochondrial membrane protein complex	2.72e-09	9	143	MT-CO1,MT-CYB,MT-ATP6,MT-ND5,MT-ND4,MT-ND2,MT-ATP8,C14orf2,VIM	9606.ENSP00000354499,9606.ENSP00000354554,9606.ENSP00000354632,9606.ENSP00000354813,9606.ENSP00000354961,9606.ENSP00000355046,9606.ENSP00000355265,9606.ENSP00000401770,9606.ENSP00000446007
COMPARTMENTS	GOCC:0098803	Respiratory chain complex	4.36e-08	7	78	MT-CO1,MT-CYB,MT-ND5,MT-CO2,MT-ND4,MT-CO3,MT-ND2	9606.ENSP00000354499,9606.ENSP00000354554,9606.ENSP00000354813,9606.ENSP00000354876,9606.ENSP00000354961,9606.ENSP00000354982,9606.ENSP00000355046
COMPARTMENTS	GOCC:0005694	Chromosome	8.23e-08	14	894	HMGB2,MT-CO1,MT-CYB,MT-ATP6,MT-ND6,MT-ND5,MT-CO2,MT-ND4,MT-ND2,MT-ATP8,UFL1,POLH,TCF4,FAM111A	9606.ENSP00000296503,9606.ENSP00000354499,9606.ENSP00000354554,9606.ENSP00000354632,9606.ENSP00000354665,9606.ENSP00000354813,9606.ENSP00000354876,9606.ENSP00000354961,9606.ENSP00000355046,9606.ENSP00000355265,9606.ENSP00000358283,9606.ENSP00000361310,9606.ENSP00000381382,9606.ENSP00000434435
COMPARTMENTS	GOCC:0031967	Organelle envelope	2.05e-07	13	788	MT-CO1,MT-CYB,MT-ATP6,MT-ND6,MT-ND5,MT-CO2,MT-ND4,MT-CO3,MT-ND2,MT-ATP8,C14orf2,CNEP1R1,VIM	9606.ENSP00000354499,9606.ENSP00000354554,9606.ENSP00000354632,9606.ENSP00000354665,9606.ENSP00000354813,9606.ENSP00000354876,9606.ENSP00000354961,9606.ENSP00000354982,9606.ENSP00000355046,9606.ENSP00000355265,9606.ENSP00000401770,9606.ENSP00000405635,9606.ENSP00000446007
COMPARTMENTS	GOCC:0043232	Intracellular non-membrane-bounded organelle	2.35e-05	20	3196	CLIP2,SUB1,HMGB2,MT-CO1,MT-CYB,MT-ATP6,MT-ND6,MT-ND5,MT-CO2,MT-ND4,MT-ND2,MT-ATP8,RPL39,MAPKAPK2,UFL1,PSRC1,POLH,TCF4,FAM111A,VIM	9606.ENSP00000223398,9606.ENSP00000265073,9606.ENSP00000296503,9606.ENSP00000354499,9606.ENSP00000354554,9606.ENSP00000354632,9606.ENSP00000354665,9606.ENSP00000354813,9606.ENSP00000354876,9606.ENSP00000354961,9606.ENSP00000355046,9606.ENSP00000355265,9606.ENSP00000355315,9606.ENSP00000356070,9606.ENSP00000358283,9606.ENSP00000358925,9606.ENSP00000361310,9606.ENSP00000381382,9606.ENSP00000434435,…
COMPARTMENTS	GOCC:0005746	Mitochondrial respirasome	3.69e-05	5	71	MT-CO1,MT-CYB,MT-ND5,MT-ND4,MT-ND2	9606.ENSP00000354499,9606.ENSP00000354554,9606.ENSP00000354813,9606.ENSP00000354961,9606.ENSP00000355046
COMPARTMENTS	GOCC:0098796	Membrane protein complex	5.57e-05	13	1321	MT-CO1,MT-CYB,MT-ATP6,MT-ND5,MT-CO2,MT-ND4,MT-CO3,MT-ND2,MT-ATP8,EMILIN1,C14orf2,CNEP1R1,VIM	9606.ENSP00000354499,9606.ENSP00000354554,9606.ENSP00000354632,9606.ENSP00000354813,9606.ENSP00000354876,9606.ENSP00000354961,9606.ENSP00000354982,9606.ENSP00000355046,9606.ENSP00000355265,9606.ENSP00000369677,9606.ENSP00000401770,9606.ENSP00000405635,9606.ENSP00000446007
COMPARTMENTS	GOCC:0070069	Cytochrome complex	5.93e-05	4	31	MT-CO1,MT-CYB,MT-CO2,MT-CO3	9606.ENSP00000354499,9606.ENSP00000354554,9606.ENSP00000354876,9606.ENSP00000354982
COMPARTMENTS	GOCC:0043231	Intracellular membrane-bounded organelle	8.03e-05	29	7476	SUB1,HMGB2,REST,PRDM8,MT-CO1,MT-CYB,MT-ATP6,MT-ND6,MT-ND5,MT-CO2,MT-ND4,MT-CO3,MT-ND2,MT-ATP8,MAPKAPK2,CRTC2,UFL1,PSRC1,POLH,SLC38A10,TCF4,MAP3K2,C14orf2,MGAT1,CNEP1R1,ERBB2IP,FAM111A,CAND1,VIM	9606.ENSP00000265073,9606.ENSP00000296503,9606.ENSP00000311816,9606.ENSP00000339764,9606.ENSP00000354499,9606.ENSP00000354554,9606.ENSP00000354632,9606.ENSP00000354665,9606.ENSP00000354813,9606.ENSP00000354876,9606.ENSP00000354961,9606.ENSP00000354982,9606.ENSP00000355046,9606.ENSP00000355265,9606.ENSP00000356070,9606.ENSP00000357622,9606.ENSP00000358283,9606.ENSP00000358925,9606.ENSP00000361310,…
COMPARTMENTS	GOCC:0043229	Intracellular organelle	0.00047	31	9242	CLIP2,SUB1,HMGB2,REST,PRDM8,MT-CO1,MT-CYB,MT-ATP6,MT-ND6,MT-ND5,MT-CO2,MT-ND4,MT-CO3,MT-ND2,MT-ATP8,RPL39,MAPKAPK2,CRTC2,UFL1,PSRC1,POLH,SLC38A10,TCF4,MAP3K2,C14orf2,MGAT1,CNEP1R1,ERBB2IP,FAM111A,CAND1,VIM	9606.ENSP00000223398,9606.ENSP00000265073,9606.ENSP00000296503,9606.ENSP00000311816,9606.ENSP00000339764,9606.ENSP00000354499,9606.ENSP00000354554,9606.ENSP00000354632,9606.ENSP00000354665,9606.ENSP00000354813,9606.ENSP00000354876,9606.ENSP00000354961,9606.ENSP00000354982,9606.ENSP00000355046,9606.ENSP00000355265,9606.ENSP00000355315,9606.ENSP00000356070,9606.ENSP00000357622,9606.ENSP00000358283,…
COMPARTMENTS	GOCC:0031090	Organelle membrane	0.0005	15	2219	MT-CO1,MT-CYB,MT-ATP6,MT-ND6,MT-ND5,MT-CO2,MT-ND4,MT-CO3,MT-ND2,MT-ATP8,UFL1,C14orf2,MGAT1,CNEP1R1,VIM	9606.ENSP00000354499,9606.ENSP00000354554,9606.ENSP00000354632,9606.ENSP00000354665,9606.ENSP00000354813,9606.ENSP00000354876,9606.ENSP00000354961,9606.ENSP00000354982,9606.ENSP00000355046,9606.ENSP00000355265,9606.ENSP00000358283,9606.ENSP00000401770,9606.ENSP00000404718,9606.ENSP00000405635,9606.ENSP00000446007
COMPARTMENTS	GOCC:0045277	Respiratory chain complex iv	0.00071	3	18	MT-CO1,MT-CO2,MT-CO3	9606.ENSP00000354499,9606.ENSP00000354876,9606.ENSP00000354982
COMPARTMENTS	GOCC:0005753	Mitochondrial proton-transporting atp synthase complex	0.00091	3	20	MT-ATP6,MT-ATP8,C14orf2	9606.ENSP00000354632,9606.ENSP00000355265,9606.ENSP00000401770
COMPARTMENTS	GOCC:0032991	Protein-containing complex	0.0017	22	5142	CLIP2,SUB1,ZYG11B,HMGB2,REST,MT-CO1,MT-CYB,MT-ATP6,MT-ND5,MT-CO2,MT-ND4,MT-CO3,MT-ND2,MT-ATP8,RPL39,UFL1,EMILIN1,TCF4,C14orf2,CNEP1R1,CAND1,VIM	9606.ENSP00000223398,9606.ENSP00000265073,9606.ENSP00000294353,9606.ENSP00000296503,9606.ENSP00000311816,9606.ENSP00000354499,9606.ENSP00000354554,9606.ENSP00000354632,9606.ENSP00000354813,9606.ENSP00000354876,9606.ENSP00000354961,9606.ENSP00000354982,9606.ENSP00000355046,9606.ENSP00000355265,9606.ENSP00000355315,9606.ENSP00000358283,9606.ENSP00000369677,9606.ENSP00000381382,9606.ENSP00000401770,…
COMPARTMENTS	GOCC:1990204	Oxidoreductase complex	0.0019	5	182	MT-CO1,MT-CYB,MT-ND5,MT-ND4,MT-ND2	9606.ENSP00000354499,9606.ENSP00000354554,9606.ENSP00000354813,9606.ENSP00000354961,9606.ENSP00000355046
COMPARTMENTS	GOCC:0005747	Mitochondrial respiratory chain complex i	0.0073	3	46	MT-ND5,MT-ND4,MT-ND2	9606.ENSP00000354813,9606.ENSP00000354961,9606.ENSP00000355046
COMPARTMENTS	GOCC:0005622	Intracellular	0.0087	32	11202	CLIP2,SUB1,ZYG11B,HMGB2,REST,PRDM8,MT-CO1,MT-CYB,MT-ATP6,MT-ND6,MT-ND5,MT-CO2,MT-ND4,MT-CO3,MT-ND2,MT-ATP8,RPL39,MAPKAPK2,CRTC2,UFL1,PSRC1,POLH,SLC38A10,TCF4,MAP3K2,C14orf2,MGAT1,CNEP1R1,ERBB2IP,FAM111A,CAND1,VIM	9606.ENSP00000223398,9606.ENSP00000265073,9606.ENSP00000294353,9606.ENSP00000296503,9606.ENSP00000311816,9606.ENSP00000339764,9606.ENSP00000354499,9606.ENSP00000354554,9606.ENSP00000354632,9606.ENSP00000354665,9606.ENSP00000354813,9606.ENSP00000354876,9606.ENSP00000354961,9606.ENSP00000354982,9606.ENSP00000355046,9606.ENSP00000355265,9606.ENSP00000355315,9606.ENSP00000356070,9606.ENSP00000357622,…
COMPARTMENTS	GOCC:0005750	Mitochondrial respiratory chain complex iii	0.0162	2	11	MT-CO1,MT-CYB	9606.ENSP00000354499,9606.ENSP00000354554
COMPARTMENTS	GOCC:0005737	Cytoplasm	0.0415	25	7871	HMGB2,REST,MT-CO1,MT-CYB,MT-ATP6,MT-ND6,MT-ND5,MT-CO2,MT-ND4,MT-CO3,MT-ND2,MT-ATP8,RPL39,MAPKAPK2,UFL1,PSRC1,SLC38A10,MAP3K2,C14orf2,MGAT1,CNEP1R1,ERBB2IP,FAM111A,CAND1,VIM	9606.ENSP00000296503,9606.ENSP00000311816,9606.ENSP00000354499,9606.ENSP00000354554,9606.ENSP00000354632,9606.ENSP00000354665,9606.ENSP00000354813,9606.ENSP00000354876,9606.ENSP00000354961,9606.ENSP00000354982,9606.ENSP00000355046,9606.ENSP00000355265,9606.ENSP00000355315,9606.ENSP00000356070,9606.ENSP00000358283,9606.ENSP00000358925,9606.ENSP00000363891,9606.ENSP00000387246,9606.ENSP00000401770,…
UniProt Keywords	KW-0429	Leber hereditary optic neuropathy	2.09e-15	8	10	MT-CO1,MT-CYB,MT-ATP6,MT-ND6,MT-ND5,MT-ND4,MT-CO3,MT-ND2	9606.ENSP00000354499,9606.ENSP00000354554,9606.ENSP00000354632,9606.ENSP00000354665,9606.ENSP00000354813,9606.ENSP00000354961,9606.ENSP00000354982,9606.ENSP00000355046
UniProt Keywords	KW-1274	Primary mitochondrial disease	1.48e-10	10	157	MT-CO1,MT-CYB,MT-ATP6,MT-ND6,MT-ND5,MT-CO2,MT-ND4,MT-CO3,MT-ND2,MT-ATP8	9606.ENSP00000354499,9606.ENSP00000354554,9606.ENSP00000354632,9606.ENSP00000354665,9606.ENSP00000354813,9606.ENSP00000354876,9606.ENSP00000354961,9606.ENSP00000354982,9606.ENSP00000355046,9606.ENSP00000355265
UniProt Keywords	KW-0679	Respiratory chain	1.28e-08	7	64	MT-CO1,MT-CYB,MT-ND6,MT-ND5,MT-CO2,MT-ND4,MT-ND2	9606.ENSP00000354499,9606.ENSP00000354554,9606.ENSP00000354665,9606.ENSP00000354813,9606.ENSP00000354876,9606.ENSP00000354961,9606.ENSP00000355046
UniProt Keywords	KW-0830	Ubiquinone	6.08e-08	5	16	MT-CYB,MT-ND6,MT-ND5,MT-ND4,MT-ND2	9606.ENSP00000354554,9606.ENSP00000354665,9606.ENSP00000354813,9606.ENSP00000354961,9606.ENSP00000355046
UniProt Keywords	KW-0867	MELAS syndrome	2.43e-05	3	4	MT-ND6,MT-ND5,MT-ND4	9606.ENSP00000354665,9606.ENSP00000354813,9606.ENSP00000354961
UniProt Keywords	KW-0999	Mitochondrion inner membrane	0.00014	7	298	MT-CO1,MT-CYB,MT-ATP6,MT-ND5,MT-CO2,MT-CO3,MT-ND2	9606.ENSP00000354499,9606.ENSP00000354554,9606.ENSP00000354632,9606.ENSP00000354813,9606.ENSP00000354876,9606.ENSP00000354982,9606.ENSP00000355046
UniProt Keywords	KW-0431	Leigh syndrome	0.00064	3	18	MT-ATP6,MT-ND6,MT-ND5	9606.ENSP00000354632,9606.ENSP00000354665,9606.ENSP00000354813
UniProt Keywords	KW-0496	Mitochondrion	0.00064	11	1176	MT-CO1,MT-CYB,MT-ATP6,MT-ND6,MT-ND5,MT-CO2,MT-ND4,MT-CO3,MT-ND2,MT-ATP8,C14orf2	9606.ENSP00000354499,9606.ENSP00000354554,9606.ENSP00000354632,9606.ENSP00000354665,9606.ENSP00000354813,9606.ENSP00000354876,9606.ENSP00000354961,9606.ENSP00000354982,9606.ENSP00000355046,9606.ENSP00000355265,9606.ENSP00000401770
UniProt Keywords	KW-1278	Translocase	0.00072	4	69	MT-ND6,MT-ND5,MT-ND4,MT-ND2	9606.ENSP00000354665,9606.ENSP00000354813,9606.ENSP00000354961,9606.ENSP00000355046
UniProt Keywords	KW-0225	Disease mutation	0.0053	16	3145	REST,PRDM8,MT-CO1,MT-CYB,MT-ATP6,MT-ND6,MT-ND5,MT-CO2,MT-ND4,MT-CO3,MT-ND2,MT-ATP8,POLH,TCF4,FAM111A,VIM	9606.ENSP00000311816,9606.ENSP00000339764,9606.ENSP00000354499,9606.ENSP00000354554,9606.ENSP00000354632,9606.ENSP00000354665,9606.ENSP00000354813,9606.ENSP00000354876,9606.ENSP00000354961,9606.ENSP00000354982,9606.ENSP00000355046,9606.ENSP00000355265,9606.ENSP00000361310,9606.ENSP00000381382,9606.ENSP00000434435,9606.ENSP00000446007
UniProt Keywords	KW-0138	CF(0)	0.0202	2	13	MT-ATP6,MT-ATP8	9606.ENSP00000354632,9606.ENSP00000355265
UniProt Keywords	KW-0520	NAD	0.0224	4	185	MT-ND6,MT-ND5,MT-ND4,MT-ND2	9606.ENSP00000354665,9606.ENSP00000354813,9606.ENSP00000354961,9606.ENSP00000355046
UniProt Keywords	KW-9995	Disease	0.0224	17	3996	CLIP2,REST,PRDM8,MT-CO1,MT-CYB,MT-ATP6,MT-ND6,MT-ND5,MT-CO2,MT-ND4,MT-CO3,MT-ND2,MT-ATP8,POLH,TCF4,FAM111A,VIM	9606.ENSP00000223398,9606.ENSP00000311816,9606.ENSP00000339764,9606.ENSP00000354499,9606.ENSP00000354554,9606.ENSP00000354632,9606.ENSP00000354665,9606.ENSP00000354813,9606.ENSP00000354876,9606.ENSP00000354961,9606.ENSP00000354982,9606.ENSP00000355046,9606.ENSP00000355265,9606.ENSP00000361310,9606.ENSP00000381382,9606.ENSP00000434435,9606.ENSP00000446007
UniProt Keywords	KW-0066	ATP synthesis	0.0235	2	16	MT-ATP6,MT-ATP8	9606.ENSP00000354632,9606.ENSP00000355265
UniProt Keywords	KW-0122	Cardiomyopathy	0.0266	3	86	MT-CYB,MT-ATP6,MT-ATP8	9606.ENSP00000354554,9606.ENSP00000354632,9606.ENSP00000355265
UniProt Keywords	KW-0813	Transport	0.031	11	1971	SLC16A7,MT-CO1,MT-CYB,MT-ATP6,MT-ND6,MT-ND5,MT-CO2,MT-ND4,MT-ND2,MT-ATP8,SLC38A10	9606.ENSP00000261187,9606.ENSP00000354499,9606.ENSP00000354554,9606.ENSP00000354632,9606.ENSP00000354665,9606.ENSP00000354813,9606.ENSP00000354876,9606.ENSP00000354961,9606.ENSP00000355046,9606.ENSP00000355265,9606.ENSP00000363891
Pfam	PF00361	Proton-conducting membrane transporter	0.00042	3	3	MT-ND5,MT-ND4,MT-ND2	9606.ENSP00000354813,9606.ENSP00000354961,9606.ENSP00000355046
InterPro	IPR001750	NADH:quinone oxidoreductase/Mrp antiporter, membrane subunit	0.00083	3	3	MT-ND5,MT-ND4,MT-ND2	9606.ENSP00000354813,9606.ENSP00000354961,9606.ENSP00000355046
PMID	PMID:34928236	(2022) Whole Mitochondrial Genome Analysis in Turkish Patients with Mitochondrial Diseases	3.89e-16	10	13	MT-CO1,MT-CYB,MT-ATP6,MT-ND6,MT-ND5,MT-CO2,MT-ND4,MT-CO3,MT-ND2,MT-ATP8	9606.ENSP00000354499,9606.ENSP00000354554,9606.ENSP00000354632,9606.ENSP00000354665,9606.ENSP00000354813,9606.ENSP00000354876,9606.ENSP00000354961,9606.ENSP00000354982,9606.ENSP00000355046,9606.ENSP00000355265
PMID	PMID:35130313	(2022) Next-generation sequencing of the whole mitochondrial genome identifies functionally deleterious mutations in patients with multiple sclerosis.	3.89e-16	10	16	MT-CO1,MT-CYB,MT-ATP6,MT-ND6,MT-ND5,MT-CO2,MT-ND4,MT-CO3,MT-ND2,MT-ATP8	9606.ENSP00000354499,9606.ENSP00000354554,9606.ENSP00000354632,9606.ENSP00000354665,9606.ENSP00000354813,9606.ENSP00000354876,9606.ENSP00000354961,9606.ENSP00000354982,9606.ENSP00000355046,9606.ENSP00000355265
PMID	PMID:33420243	(2021) Analysis of human mitochondrial genome co-occurrence networks of Asian population at varying altitudes.	3.89e-16	10	16	MT-CO1,MT-CYB,MT-ATP6,MT-ND6,MT-ND5,MT-CO2,MT-ND4,MT-CO3,MT-ND2,MT-ATP8	9606.ENSP00000354499,9606.ENSP00000354554,9606.ENSP00000354632,9606.ENSP00000354665,9606.ENSP00000354813,9606.ENSP00000354876,9606.ENSP00000354961,9606.ENSP00000354982,9606.ENSP00000355046,9606.ENSP00000355265
PMID	PMID:33652663	(2021) A Typical Case Presentation with Spontaneous Visual Recovery in Patient Diagnosed with Leber Hereditary Optic Neuropathy due to Rare Point Mutation in MT-ND4 Gene (m.11253T>C) and Literature Review.	3.89e-16	10	14	MT-CO1,MT-CYB,MT-ATP6,MT-ND6,MT-ND5,MT-CO2,MT-ND4,MT-CO3,MT-ND2,MT-ATP8	9606.ENSP00000354499,9606.ENSP00000354554,9606.ENSP00000354632,9606.ENSP00000354665,9606.ENSP00000354813,9606.ENSP00000354876,9606.ENSP00000354961,9606.ENSP00000354982,9606.ENSP00000355046,9606.ENSP00000355265
PMID	PMID:33802000	(2021) Dentex dentex Frauds: Establishment of a New DNA Barcoding Marker.	3.89e-16	10	13	MT-CO1,MT-CYB,MT-ATP6,MT-ND6,MT-ND5,MT-CO2,MT-ND4,MT-CO3,MT-ND2,MT-ATP8	9606.ENSP00000354499,9606.ENSP00000354554,9606.ENSP00000354632,9606.ENSP00000354665,9606.ENSP00000354813,9606.ENSP00000354876,9606.ENSP00000354961,9606.ENSP00000354982,9606.ENSP00000355046,9606.ENSP00000355265
PMID	PMID:33948495	(2021) The mitochondrial genome of Asyndetus clavipes (Diptera: Dolichopodidae).	3.89e-16	10	13	MT-CO1,MT-CYB,MT-ATP6,MT-ND6,MT-ND5,MT-CO2,MT-ND4,MT-CO3,MT-ND2,MT-ATP8	9606.ENSP00000354499,9606.ENSP00000354554,9606.ENSP00000354632,9606.ENSP00000354665,9606.ENSP00000354813,9606.ENSP00000354876,9606.ENSP00000354961,9606.ENSP00000354982,9606.ENSP00000355046,9606.ENSP00000355265
PMID	PMID:34016171	(2021) Highly rearranged mitochondrial genome in Falcolipeurus lice (Phthiraptera: Philopteridae) from endangered eagles.	3.89e-16	10	19	MT-CO1,MT-CYB,MT-ATP6,MT-ND6,MT-ND5,MT-CO2,MT-ND4,MT-CO3,MT-ND2,MT-ATP8	9606.ENSP00000354499,9606.ENSP00000354554,9606.ENSP00000354632,9606.ENSP00000354665,9606.ENSP00000354813,9606.ENSP00000354876,9606.ENSP00000354961,9606.ENSP00000354982,9606.ENSP00000355046,9606.ENSP00000355265
PMID	PMID:34072607	(2021) Mitochondrial DNA Alterations in Glioblastoma (GBM).	3.89e-16	10	19	MT-CO1,MT-CYB,MT-ATP6,MT-ND6,MT-ND5,MT-CO2,MT-ND4,MT-CO3,MT-ND2,MT-ATP8	9606.ENSP00000354499,9606.ENSP00000354554,9606.ENSP00000354632,9606.ENSP00000354665,9606.ENSP00000354813,9606.ENSP00000354876,9606.ENSP00000354961,9606.ENSP00000354982,9606.ENSP00000355046,9606.ENSP00000355265
PMID	PMID:34124361	(2021) The mitochondrial genome of Desmomyia sinensis (Diptera: Rhagionidae).	3.89e-16	10	13	MT-CO1,MT-CYB,MT-ATP6,MT-ND6,MT-ND5,MT-CO2,MT-ND4,MT-CO3,MT-ND2,MT-ATP8	9606.ENSP00000354499,9606.ENSP00000354554,9606.ENSP00000354632,9606.ENSP00000354665,9606.ENSP00000354813,9606.ENSP00000354876,9606.ENSP00000354961,9606.ENSP00000354982,9606.ENSP00000355046,9606.ENSP00000355265
PMID	PMID:34179466	(2021) High-throughput sequencing yields a complete mitochondrial genome of the Cryptotympana atrata (Insecta: Hemiptera: Cicadidae).	3.89e-16	10	13	MT-CO1,MT-CYB,MT-ATP6,MT-ND6,MT-ND5,MT-CO2,MT-ND4,MT-CO3,MT-ND2,MT-ATP8	9606.ENSP00000354499,9606.ENSP00000354554,9606.ENSP00000354632,9606.ENSP00000354665,9606.ENSP00000354813,9606.ENSP00000354876,9606.ENSP00000354961,9606.ENSP00000354982,9606.ENSP00000355046,9606.ENSP00000355265
PMID	PMID:34286094	(2021) The mitochondrial genome of Lichtwardtia dentalis Zhang, Masunaga et Yang, 2009 (Diptera: Dolichopodidae).	3.89e-16	10	13	MT-CO1,MT-CYB,MT-ATP6,MT-ND6,MT-ND5,MT-CO2,MT-ND4,MT-CO3,MT-ND2,MT-ATP8	9606.ENSP00000354499,9606.ENSP00000354554,9606.ENSP00000354632,9606.ENSP00000354665,9606.ENSP00000354813,9606.ENSP00000354876,9606.ENSP00000354961,9606.ENSP00000354982,9606.ENSP00000355046,9606.ENSP00000355265
PMID	PMID:34632016	(2021) New complete mitogenome datasets and their characterization of the European catfish (Silurus glanis).	3.89e-16	10	13	MT-CO1,MT-CYB,MT-ATP6,MT-ND6,MT-ND5,MT-CO2,MT-ND4,MT-CO3,MT-ND2,MT-ATP8	9606.ENSP00000354499,9606.ENSP00000354554,9606.ENSP00000354632,9606.ENSP00000354665,9606.ENSP00000354813,9606.ENSP00000354876,9606.ENSP00000354961,9606.ENSP00000354982,9606.ENSP00000355046,9606.ENSP00000355265
PMID	PMID:34746406	(2021) The complete mitogenome of the Greytail angelfish Chaetodontoplus poliourus and its phylogenetic relationships (Perciformes: Pomacanthidae).	3.89e-16	10	13	MT-CO1,MT-CYB,MT-ATP6,MT-ND6,MT-ND5,MT-CO2,MT-ND4,MT-CO3,MT-ND2,MT-ATP8	9606.ENSP00000354499,9606.ENSP00000354554,9606.ENSP00000354632,9606.ENSP00000354665,9606.ENSP00000354813,9606.ENSP00000354876,9606.ENSP00000354961,9606.ENSP00000354982,9606.ENSP00000355046,9606.ENSP00000355265
PMID	PMID:32658146	(2020) A genetic polymorphism that is associated with mitochondrial energy metabolism increases risk of fibromyalgia.	3.89e-16	10	14	MT-CO1,MT-CYB,MT-ATP6,MT-ND6,MT-ND5,MT-CO2,MT-ND4,MT-CO3,MT-ND2,MT-ATP8	9606.ENSP00000354499,9606.ENSP00000354554,9606.ENSP00000354632,9606.ENSP00000354665,9606.ENSP00000354813,9606.ENSP00000354876,9606.ENSP00000354961,9606.ENSP00000354982,9606.ENSP00000355046,9606.ENSP00000355265
PMID	PMID:33366960	(2020) The mitochondrial genome of Chelipoda sp. (Diptera: Empididae).	3.89e-16	10	13	MT-CO1,MT-CYB,MT-ATP6,MT-ND6,MT-ND5,MT-CO2,MT-ND4,MT-CO3,MT-ND2,MT-ATP8	9606.ENSP00000354499,9606.ENSP00000354554,9606.ENSP00000354632,9606.ENSP00000354665,9606.ENSP00000354813,9606.ENSP00000354876,9606.ENSP00000354961,9606.ENSP00000354982,9606.ENSP00000355046,9606.ENSP00000355265
PMID	PMID:33457818	(2020) The mitochondrial genome of Anthalia sp. (Diptera: Empididae).	3.89e-16	10	13	MT-CO1,MT-CYB,MT-ATP6,MT-ND6,MT-ND5,MT-CO2,MT-ND4,MT-CO3,MT-ND2,MT-ATP8	9606.ENSP00000354499,9606.ENSP00000354554,9606.ENSP00000354632,9606.ENSP00000354665,9606.ENSP00000354813,9606.ENSP00000354876,9606.ENSP00000354961,9606.ENSP00000354982,9606.ENSP00000355046,9606.ENSP00000355265
PMID	PMID:33490246	(2020) Sequencing and Characterization of Mitochondrial Protein-Coding Genes for Schizothorax niger (Cypriniformes: Cyprinidae) with Phylogenetic Consideration.	3.89e-16	10	12	MT-CO1,MT-CYB,MT-ATP6,MT-ND6,MT-ND5,MT-CO2,MT-ND4,MT-CO3,MT-ND2,MT-ATP8	9606.ENSP00000354499,9606.ENSP00000354554,9606.ENSP00000354632,9606.ENSP00000354665,9606.ENSP00000354813,9606.ENSP00000354876,9606.ENSP00000354961,9606.ENSP00000354982,9606.ENSP00000355046,9606.ENSP00000355265
PMID	PMID:31396450	(2019) The revised complete mitogenome sequence of the tree frog Polypedatesmegacephalus (Anura, Rhacophoridae) by next-generation sequencing and phylogenetic analysis.	3.89e-16	10	15	MT-CO1,MT-CYB,MT-ATP6,MT-ND6,MT-ND5,MT-CO2,MT-ND4,MT-CO3,MT-ND2,MT-ATP8	9606.ENSP00000354499,9606.ENSP00000354554,9606.ENSP00000354632,9606.ENSP00000354665,9606.ENSP00000354813,9606.ENSP00000354876,9606.ENSP00000354961,9606.ENSP00000354982,9606.ENSP00000355046,9606.ENSP00000355265
PMID	PMID:33365546	(2019) The mitochondrial genome of Oreogeton sp. (Diptera: Empididae).	3.89e-16	10	13	MT-CO1,MT-CYB,MT-ATP6,MT-ND6,MT-ND5,MT-CO2,MT-ND4,MT-CO3,MT-ND2,MT-ATP8	9606.ENSP00000354499,9606.ENSP00000354554,9606.ENSP00000354632,9606.ENSP00000354665,9606.ENSP00000354813,9606.ENSP00000354876,9606.ENSP00000354961,9606.ENSP00000354982,9606.ENSP00000355046,9606.ENSP00000355265
PMID	PMID:33365547	(2019) The mitochondrial genome of Conosia irrorata (Diptera: Limoniidae).	3.89e-16	10	12	MT-CO1,MT-CYB,MT-ATP6,MT-ND6,MT-ND5,MT-CO2,MT-ND4,MT-CO3,MT-ND2,MT-ATP8	9606.ENSP00000354499,9606.ENSP00000354554,9606.ENSP00000354632,9606.ENSP00000354665,9606.ENSP00000354813,9606.ENSP00000354876,9606.ENSP00000354961,9606.ENSP00000354982,9606.ENSP00000355046,9606.ENSP00000355265
PMID	PMID:33365762	(2019) The mitochondrial genome of Vulgichneumon sp. (Hymenoptera: Ichneumonidae).	3.89e-16	10	13	MT-CO1,MT-CYB,MT-ATP6,MT-ND6,MT-ND5,MT-CO2,MT-ND4,MT-CO3,MT-ND2,MT-ATP8	9606.ENSP00000354499,9606.ENSP00000354554,9606.ENSP00000354632,9606.ENSP00000354665,9606.ENSP00000354813,9606.ENSP00000354876,9606.ENSP00000354961,9606.ENSP00000354982,9606.ENSP00000355046,9606.ENSP00000355265
PMID	PMID:28993255	(2018) Relations of mitochondrial genetic variants to measures of vascular function.	3.89e-16	10	14	MT-CO1,MT-CYB,MT-ATP6,MT-ND6,MT-ND5,MT-CO2,MT-ND4,MT-CO3,MT-ND2,MT-ATP8	9606.ENSP00000354499,9606.ENSP00000354554,9606.ENSP00000354632,9606.ENSP00000354665,9606.ENSP00000354813,9606.ENSP00000354876,9606.ENSP00000354961,9606.ENSP00000354982,9606.ENSP00000355046,9606.ENSP00000355265
PMID	PMID:29423652	(2018) Deep sequencing of the mitochondrial genome reveals common heteroplasmic sites in NADH dehydrogenase genes.	3.89e-16	10	15	MT-CO1,MT-CYB,MT-ATP6,MT-ND6,MT-ND5,MT-CO2,MT-ND4,MT-CO3,MT-ND2,MT-ATP8	9606.ENSP00000354499,9606.ENSP00000354554,9606.ENSP00000354632,9606.ENSP00000354665,9606.ENSP00000354813,9606.ENSP00000354876,9606.ENSP00000354961,9606.ENSP00000354982,9606.ENSP00000355046,9606.ENSP00000355265
PMID	PMID:29141006	(2017) The mitochondrial genome of Muga silkworm (Antheraea assamensis) and its comparative analysis with other lepidopteran insects.	3.89e-16	10	13	MT-CO1,MT-CYB,MT-ATP6,MT-ND6,MT-ND5,MT-CO2,MT-ND4,MT-CO3,MT-ND2,MT-ATP8	9606.ENSP00000354499,9606.ENSP00000354554,9606.ENSP00000354632,9606.ENSP00000354665,9606.ENSP00000354813,9606.ENSP00000354876,9606.ENSP00000354961,9606.ENSP00000354982,9606.ENSP00000355046,9606.ENSP00000355265
PMID	PMID:33473758	(2017) Complete mitochondrial genome of Ophichthus rotundus (Anguilliformes: Ophichthidae).	3.89e-16	10	13	MT-CO1,MT-CYB,MT-ATP6,MT-ND6,MT-ND5,MT-CO2,MT-ND4,MT-CO3,MT-ND2,MT-ATP8	9606.ENSP00000354499,9606.ENSP00000354554,9606.ENSP00000354632,9606.ENSP00000354665,9606.ENSP00000354813,9606.ENSP00000354876,9606.ENSP00000354961,9606.ENSP00000354982,9606.ENSP00000355046,9606.ENSP00000355265
PMID	PMID:33473763	(2017) Complete mitochondrial DNA sequence of Brachysomophis crocodilinus (Anguilliformes: Ophichthidae).	3.89e-16	10	13	MT-CO1,MT-CYB,MT-ATP6,MT-ND6,MT-ND5,MT-CO2,MT-ND4,MT-CO3,MT-ND2,MT-ATP8	9606.ENSP00000354499,9606.ENSP00000354554,9606.ENSP00000354632,9606.ENSP00000354665,9606.ENSP00000354813,9606.ENSP00000354876,9606.ENSP00000354961,9606.ENSP00000354982,9606.ENSP00000355046,9606.ENSP00000355265
PMID	PMID:33473844	(2017) The complete mitochondrial genome sequence of Squalidus multimaculatus (Cypriniformes: Cyprinidae).	3.89e-16	10	13	MT-CO1,MT-CYB,MT-ATP6,MT-ND6,MT-ND5,MT-CO2,MT-ND4,MT-CO3,MT-ND2,MT-ATP8	9606.ENSP00000354499,9606.ENSP00000354554,9606.ENSP00000354632,9606.ENSP00000354665,9606.ENSP00000354813,9606.ENSP00000354876,9606.ENSP00000354961,9606.ENSP00000354982,9606.ENSP00000355046,9606.ENSP00000355265
PMID	PMID:26225473	(2015) First mitochondrial genome for the red crab (Charybdis feriata) with implication of phylogenomics and population genetics.	3.89e-16	10	12	MT-CO1,MT-CYB,MT-ATP6,MT-ND6,MT-ND5,MT-CO2,MT-ND4,MT-CO3,MT-ND2,MT-ATP8	9606.ENSP00000354499,9606.ENSP00000354554,9606.ENSP00000354632,9606.ENSP00000354665,9606.ENSP00000354813,9606.ENSP00000354876,9606.ENSP00000354961,9606.ENSP00000354982,9606.ENSP00000355046,9606.ENSP00000355265
PMID	PMID:24383468	(2014) The identification of mitochondrial DNA variants in glioblastoma multiforme.	3.89e-16	10	19	MT-CO1,MT-CYB,MT-ATP6,MT-ND6,MT-ND5,MT-CO2,MT-ND4,MT-CO3,MT-ND2,MT-ATP8	9606.ENSP00000354499,9606.ENSP00000354554,9606.ENSP00000354632,9606.ENSP00000354665,9606.ENSP00000354813,9606.ENSP00000354876,9606.ENSP00000354961,9606.ENSP00000354982,9606.ENSP00000355046,9606.ENSP00000355265
PMID	PMID:20211597	(2010) Human mitochondrial mRNAs--like members of all families, similar but different.	3.89e-16	10	17	MT-CO1,MT-CYB,MT-ATP6,MT-ND6,MT-ND5,MT-CO2,MT-ND4,MT-CO3,MT-ND2,MT-ATP8	9606.ENSP00000354499,9606.ENSP00000354554,9606.ENSP00000354632,9606.ENSP00000354665,9606.ENSP00000354813,9606.ENSP00000354876,9606.ENSP00000354961,9606.ENSP00000354982,9606.ENSP00000355046,9606.ENSP00000355265
PMID	PMID:20361014	(2010) Mitochondrial DNA analysis in primary congenital glaucoma.	3.89e-16	10	16	MT-CO1,MT-CYB,MT-ATP6,MT-ND6,MT-ND5,MT-CO2,MT-ND4,MT-CO3,MT-ND2,MT-ATP8	9606.ENSP00000354499,9606.ENSP00000354554,9606.ENSP00000354632,9606.ENSP00000354665,9606.ENSP00000354813,9606.ENSP00000354876,9606.ENSP00000354961,9606.ENSP00000354982,9606.ENSP00000355046,9606.ENSP00000355265
PMID	PMID:20454697	(2010) Identification of novel mitochondrial mutations in Lebers hereditary optic neuropathy.	3.89e-16	10	12	MT-CO1,MT-CYB,MT-ATP6,MT-ND6,MT-ND5,MT-CO2,MT-ND4,MT-CO3,MT-ND2,MT-ATP8	9606.ENSP00000354499,9606.ENSP00000354554,9606.ENSP00000354632,9606.ENSP00000354665,9606.ENSP00000354813,9606.ENSP00000354876,9606.ENSP00000354961,9606.ENSP00000354982,9606.ENSP00000355046,9606.ENSP00000355265
PMID	PMID:20813043	(2010) Distinct patterns of mitochondrial genome diversity in bonobos (Pan paniscus) and humans.	3.89e-16	10	14	MT-CO1,MT-CYB,MT-ATP6,MT-ND6,MT-ND5,MT-CO2,MT-ND4,MT-CO3,MT-ND2,MT-ATP8	9606.ENSP00000354499,9606.ENSP00000354554,9606.ENSP00000354632,9606.ENSP00000354665,9606.ENSP00000354813,9606.ENSP00000354876,9606.ENSP00000354961,9606.ENSP00000354982,9606.ENSP00000355046,9606.ENSP00000355265
PMID	PMID:15291971	(2004) Organization of the mitochondrial genomes of whiteflies, aphids, and psyllids (Hemiptera, Sternorrhyncha).	3.89e-16	10	14	MT-CO1,MT-CYB,MT-ATP6,MT-ND6,MT-ND5,MT-CO2,MT-ND4,MT-CO3,MT-ND2,MT-ATP8	9606.ENSP00000354499,9606.ENSP00000354554,9606.ENSP00000354632,9606.ENSP00000354665,9606.ENSP00000354813,9606.ENSP00000354876,9606.ENSP00000354961,9606.ENSP00000354982,9606.ENSP00000355046,9606.ENSP00000355265
PMID	PMID:35085849	(2022) Comprehensive summary of mitochondrial DNA alterations in the postmortem human brain: A systematic review.	5.11e-16	10	20	MT-CO1,MT-CYB,MT-ATP6,MT-ND6,MT-ND5,MT-CO2,MT-ND4,MT-CO3,MT-ND2,MT-ATP8	9606.ENSP00000354499,9606.ENSP00000354554,9606.ENSP00000354632,9606.ENSP00000354665,9606.ENSP00000354813,9606.ENSP00000354876,9606.ENSP00000354961,9606.ENSP00000354982,9606.ENSP00000355046,9606.ENSP00000355265
PMID	PMID:35173516	(2022) Complete mitogenomes of four Trichiurus species: A taxonomic review of the T.lepturus species complex.	1.08e-15	9	10	MT-CO1,MT-CYB,MT-ATP6,MT-ND6,MT-CO2,MT-ND4,MT-CO3,MT-ND2,MT-ATP8	9606.ENSP00000354499,9606.ENSP00000354554,9606.ENSP00000354632,9606.ENSP00000354665,9606.ENSP00000354876,9606.ENSP00000354961,9606.ENSP00000354982,9606.ENSP00000355046,9606.ENSP00000355265
PMID	PMID:32630142	(2020) Complete Mitogenomes of Three Carangidae (Perciformes) Fishes: Genome Description and Phylogenetic Considerations.	1.08e-15	9	10	MT-CO1,MT-CYB,MT-ATP6,MT-ND6,MT-CO2,MT-ND4,MT-CO3,MT-ND2,MT-ATP8	9606.ENSP00000354499,9606.ENSP00000354554,9606.ENSP00000354632,9606.ENSP00000354665,9606.ENSP00000354876,9606.ENSP00000354961,9606.ENSP00000354982,9606.ENSP00000355046,9606.ENSP00000355265
PMID	PMID:33553622	(2018) Complete mitochondrial genome of Anser albifrons frontails (Anseriformes: Anatidae).	1.08e-15	9	10	MT-CO1,MT-CYB,MT-ATP6,MT-ND6,MT-CO2,MT-ND4,MT-CO3,MT-ND2,MT-ATP8	9606.ENSP00000354499,9606.ENSP00000354554,9606.ENSP00000354632,9606.ENSP00000354665,9606.ENSP00000354876,9606.ENSP00000354961,9606.ENSP00000354982,9606.ENSP00000355046,9606.ENSP00000355265
PMID	PMID:33644383	(2018) Analysis of the complete mitochondrial genomes of two forensically important blowfly species: Lucilia caesar and Lucilia illustris.	1.08e-15	9	10	MT-CO1,MT-CYB,MT-ATP6,MT-ND6,MT-CO2,MT-ND4,MT-CO3,MT-ND2,MT-ATP8	9606.ENSP00000354499,9606.ENSP00000354554,9606.ENSP00000354632,9606.ENSP00000354665,9606.ENSP00000354876,9606.ENSP00000354961,9606.ENSP00000354982,9606.ENSP00000355046,9606.ENSP00000355265
PMID	PMID:23691106	(2013) Maternal low-protein diet affects epigenetic regulation of hepatic mitochondrial DNA transcription in a sex-specific manner in newborn piglets associated with GR binding to its promoter.	1.37e-15	10	23	MT-CO1,MT-CYB,MT-ATP6,MT-ND6,MT-ND5,MT-CO2,MT-ND4,MT-CO3,MT-ND2,MT-ATP8	9606.ENSP00000354499,9606.ENSP00000354554,9606.ENSP00000354632,9606.ENSP00000354665,9606.ENSP00000354813,9606.ENSP00000354876,9606.ENSP00000354961,9606.ENSP00000354982,9606.ENSP00000355046,9606.ENSP00000355265
PMID	PMID:33458173	(2020) Characterization of the complete mitochondrial genome of Chinese Konosirus punctatus (Clupeiformes, Clupeidae) and phylogenetic studies of Clupeiformes.	1.73e-15	9	11	MT-CO1,MT-CYB,MT-ATP6,MT-ND6,MT-CO2,MT-ND4,MT-CO3,MT-ND2,MT-ATP8	9606.ENSP00000354499,9606.ENSP00000354554,9606.ENSP00000354632,9606.ENSP00000354665,9606.ENSP00000354876,9606.ENSP00000354961,9606.ENSP00000354982,9606.ENSP00000355046,9606.ENSP00000355265
PMID	PMID:30949164	(2019) New Variant of MELAS Syndrome With Executive Dysfunction, Heteroplasmic Point Mutation in the MT-ND4 Gene (m.12015T>C; p.Leu419Pro) and Comorbid Polyglandular Autoimmune Syndrome Type 2.	1.73e-15	10	24	MT-CO1,MT-CYB,MT-ATP6,MT-ND6,MT-ND5,MT-CO2,MT-ND4,MT-CO3,MT-ND2,MT-ATP8	9606.ENSP00000354499,9606.ENSP00000354554,9606.ENSP00000354632,9606.ENSP00000354665,9606.ENSP00000354813,9606.ENSP00000354876,9606.ENSP00000354961,9606.ENSP00000354982,9606.ENSP00000355046,9606.ENSP00000355265
PMID	PMID:31673122	(2019) Whole mitochondrial genome sequencing highlights mitochondrial impact in gastric cancer.	1.73e-15	9	11	MT-CO1,MT-CYB,MT-ND6,MT-ND5,MT-CO2,MT-ND4,MT-CO3,MT-ND2,MT-ATP8	9606.ENSP00000354499,9606.ENSP00000354554,9606.ENSP00000354665,9606.ENSP00000354813,9606.ENSP00000354876,9606.ENSP00000354961,9606.ENSP00000354982,9606.ENSP00000355046,9606.ENSP00000355265
PMID	PMID:33365578	(2019) The complete mitochondrial genome of Helan Mountain chukar Alectoris chukar potanini (Galliformes: Phasianidae).	1.73e-15	9	11	MT-CO1,MT-CYB,MT-ATP6,MT-ND6,MT-CO2,MT-ND4,MT-CO3,MT-ND2,MT-ATP8	9606.ENSP00000354499,9606.ENSP00000354554,9606.ENSP00000354632,9606.ENSP00000354665,9606.ENSP00000354876,9606.ENSP00000354961,9606.ENSP00000354982,9606.ENSP00000355046,9606.ENSP00000355265
PMID	PMID:33366069	(2019) The complete mitochondrial genome of Engraulis ringens (Engraulidae, Clupeiformes) and phylogenetic studies of Engraulidae.	1.73e-15	9	11	MT-CO1,MT-CYB,MT-ATP6,MT-ND6,MT-CO2,MT-ND4,MT-CO3,MT-ND2,MT-ATP8	9606.ENSP00000354499,9606.ENSP00000354554,9606.ENSP00000354632,9606.ENSP00000354665,9606.ENSP00000354876,9606.ENSP00000354961,9606.ENSP00000354982,9606.ENSP00000355046,9606.ENSP00000355265
PMID	PMID:33366190	(2019) Particular gene order and complete mitochondrial genome of Ariosoma meeki (Congridae, Ariosoma).	1.73e-15	9	11	MT-CO1,MT-CYB,MT-ATP6,MT-ND6,MT-CO2,MT-ND4,MT-CO3,MT-ND2,MT-ATP8	9606.ENSP00000354499,9606.ENSP00000354554,9606.ENSP00000354632,9606.ENSP00000354665,9606.ENSP00000354876,9606.ENSP00000354961,9606.ENSP00000354982,9606.ENSP00000355046,9606.ENSP00000355265
PMID	PMID:30185817	(2018) Characterization of Mutations in the Mitochondrial Encoded Electron Transport Chain Complexes in Acute Myeloid Leukemia.	1.73e-15	10	24	MT-CO1,MT-CYB,MT-ATP6,MT-ND6,MT-ND5,MT-CO2,MT-ND4,MT-CO3,MT-ND2,MT-ATP8	9606.ENSP00000354499,9606.ENSP00000354554,9606.ENSP00000354632,9606.ENSP00000354665,9606.ENSP00000354813,9606.ENSP00000354876,9606.ENSP00000354961,9606.ENSP00000354982,9606.ENSP00000355046,9606.ENSP00000355265
PMID	PMID:33474137	(2018) Identification and analysis of the complete mitochondrial genome of Acheilognathus omeiensis (Cypriniformes, Cyprinidae).	1.73e-15	9	11	MT-CO1,MT-CYB,MT-ATP6,MT-ND6,MT-CO2,MT-ND4,MT-CO3,MT-ND2,MT-ATP8	9606.ENSP00000354499,9606.ENSP00000354554,9606.ENSP00000354632,9606.ENSP00000354665,9606.ENSP00000354876,9606.ENSP00000354961,9606.ENSP00000354982,9606.ENSP00000355046,9606.ENSP00000355265
PMID	PMID:33474358	(2018) Characterization of complete mitochondrial genome of two-spot swimming crab Charybdis bimaculata (Miers, 1886).	1.73e-15	9	11	MT-CO1,MT-CYB,MT-ATP6,MT-ND6,MT-CO2,MT-ND4,MT-CO3,MT-ND2,MT-ATP8	9606.ENSP00000354499,9606.ENSP00000354554,9606.ENSP00000354632,9606.ENSP00000354665,9606.ENSP00000354876,9606.ENSP00000354961,9606.ENSP00000354982,9606.ENSP00000355046,9606.ENSP00000355265
PMID	PMID:33537413	(2018) The mitochondrial genome of Diostracus lamellatus (Diptera: Dolichopodidae).	1.73e-15	9	11	MT-CO1,MT-CYB,MT-ATP6,MT-ND6,MT-CO2,MT-ND4,MT-CO3,MT-ND2,MT-ATP8	9606.ENSP00000354499,9606.ENSP00000354554,9606.ENSP00000354632,9606.ENSP00000354665,9606.ENSP00000354876,9606.ENSP00000354961,9606.ENSP00000354982,9606.ENSP00000355046,9606.ENSP00000355265
PMID	PMID:24938103	(2016) The complete mitochondrial genome of the wasp spider Argiope bruennichi (Araneae: Araneidae).	1.73e-15	9	11	MT-CO1,MT-CYB,MT-ATP6,MT-ND6,MT-CO2,MT-ND4,MT-CO3,MT-ND2,MT-ATP8	9606.ENSP00000354499,9606.ENSP00000354554,9606.ENSP00000354632,9606.ENSP00000354665,9606.ENSP00000354876,9606.ENSP00000354961,9606.ENSP00000354982,9606.ENSP00000355046,9606.ENSP00000355265
PMID	PMID:25208170	(2016) The complete mitochondrial genome of the leopard spider Pardosa laura (Araneae: Lycosidae).	1.73e-15	9	11	MT-CO1,MT-CYB,MT-ATP6,MT-ND6,MT-CO2,MT-ND4,MT-CO3,MT-ND2,MT-ATP8	9606.ENSP00000354499,9606.ENSP00000354554,9606.ENSP00000354632,9606.ENSP00000354665,9606.ENSP00000354876,9606.ENSP00000354961,9606.ENSP00000354982,9606.ENSP00000355046,9606.ENSP00000355265
PMID	PMID:25211087	(2016) The complete mitochondrial genome of the blackspotted croaker Protonibea diacanthus (Perciformes, Sciaenidae).	1.73e-15	9	11	MT-CO1,MT-CYB,MT-ATP6,MT-ND6,MT-CO2,MT-ND4,MT-CO3,MT-ND2,MT-ATP8	9606.ENSP00000354499,9606.ENSP00000354554,9606.ENSP00000354632,9606.ENSP00000354665,9606.ENSP00000354876,9606.ENSP00000354961,9606.ENSP00000354982,9606.ENSP00000355046,9606.ENSP00000355265
PMID	PMID:16948842	(2006) The complete sequences and gene organisation of the mitochondrial genomes of the heterodont bivalves Acanthocardia tuberculata and Hiatella arctica--and the first record for a putative Atpase subunit 8 gene in marine bivalves.	1.73e-15	9	11	MT-CO1,MT-CYB,MT-ATP6,MT-ND6,MT-CO2,MT-ND4,MT-CO3,MT-ND2,MT-ATP8	9606.ENSP00000354499,9606.ENSP00000354554,9606.ENSP00000354632,9606.ENSP00000354665,9606.ENSP00000354876,9606.ENSP00000354961,9606.ENSP00000354982,9606.ENSP00000355046,9606.ENSP00000355265
PMID	PMID:34926818	(2022) The complete mitochondrial genome of the firefly Curtos fulvocapitalis (Coleoptera: Lampyridae).	2.25e-15	9	12	MT-CO1,MT-CYB,MT-ATP6,MT-ND6,MT-CO2,MT-ND4,MT-CO3,MT-ND2,MT-ATP8	9606.ENSP00000354499,9606.ENSP00000354554,9606.ENSP00000354632,9606.ENSP00000354665,9606.ENSP00000354876,9606.ENSP00000354961,9606.ENSP00000354982,9606.ENSP00000355046,9606.ENSP00000355265
PMID	PMID:34993333	(2022) Characterization of the complete mitochondrial genome of Rhynocoris fuscipes (Fabricius 1787) (Hemiptera: Reduviidae).	2.25e-15	9	12	MT-CO1,MT-CYB,MT-ATP6,MT-ND6,MT-CO2,MT-ND4,MT-CO3,MT-ND2,MT-ATP8	9606.ENSP00000354499,9606.ENSP00000354554,9606.ENSP00000354632,9606.ENSP00000354665,9606.ENSP00000354876,9606.ENSP00000354961,9606.ENSP00000354982,9606.ENSP00000355046,9606.ENSP00000355265
PMID	PMID:35023005	(2022) Mitogenome of Knodus borki (Cypriniformes: Characidae): genomic characterization and phylogenetic analysis.	2.25e-15	9	12	MT-CO1,MT-CYB,MT-ATP6,MT-ND6,MT-CO2,MT-ND4,MT-CO3,MT-ND2,MT-ATP8	9606.ENSP00000354499,9606.ENSP00000354554,9606.ENSP00000354632,9606.ENSP00000354665,9606.ENSP00000354876,9606.ENSP00000354961,9606.ENSP00000354982,9606.ENSP00000355046,9606.ENSP00000355265
PMID	PMID:35071760	(2022) First report of the complete mitogenome of Tanypus punctipennis Meigen, 1818 (Diptera, Chironomidae) from Hebei Province, China.	2.25e-15	9	12	MT-CO1,MT-CYB,MT-ATP6,MT-ND6,MT-CO2,MT-ND4,MT-CO3,MT-ND2,MT-ATP8	9606.ENSP00000354499,9606.ENSP00000354554,9606.ENSP00000354632,9606.ENSP00000354665,9606.ENSP00000354876,9606.ENSP00000354961,9606.ENSP00000354982,9606.ENSP00000355046,9606.ENSP00000355265
PMID	PMID:35115873	(2022) Comparative analysis of the mitogenomes of two Corydoras (Siluriformes, Loricarioidei) with nine known Corydoras, and a phylogenetic analysis of Loricarioidei.	2.25e-15	9	14	MT-CO1,MT-CYB,MT-ATP6,MT-ND6,MT-CO2,MT-ND4,MT-CO3,MT-ND2,MT-ATP8	9606.ENSP00000354499,9606.ENSP00000354554,9606.ENSP00000354632,9606.ENSP00000354665,9606.ENSP00000354876,9606.ENSP00000354961,9606.ENSP00000354982,9606.ENSP00000355046,9606.ENSP00000355265
PMID	PMID:35174285	(2022) Complete mitochondrial genomes of two snail mite: Riccardoella tokyoensis and R. reaumuri (Acariformes, Prostigmata, Ereynetidae).	2.25e-15	9	12	MT-CO1,MT-CYB,MT-ATP6,MT-ND6,MT-CO2,MT-ND4,MT-CO3,MT-ND2,MT-ATP8	9606.ENSP00000354499,9606.ENSP00000354554,9606.ENSP00000354632,9606.ENSP00000354665,9606.ENSP00000354876,9606.ENSP00000354961,9606.ENSP00000354982,9606.ENSP00000355046,9606.ENSP00000355265
PMID	PMID:35252570	(2022) Mussel Unio douglasiae MG from the Chihe River: mitogenome description and phylogenetic analysis.	2.25e-15	9	12	MT-CO1,MT-CYB,MT-ATP6,MT-ND6,MT-CO2,MT-ND4,MT-CO3,MT-ND2,MT-ATP8	9606.ENSP00000354499,9606.ENSP00000354554,9606.ENSP00000354632,9606.ENSP00000354665,9606.ENSP00000354876,9606.ENSP00000354961,9606.ENSP00000354982,9606.ENSP00000355046,9606.ENSP00000355265
PMID	PMID:35311202	(2022) The complete mitochondrial genome of major malaria vector Anopheles anthropophagus (Diptera: Culicidae) in China.	2.25e-15	9	12	MT-CO1,MT-CYB,MT-ATP6,MT-ND6,MT-CO2,MT-ND4,MT-CO3,MT-ND2,MT-ATP8	9606.ENSP00000354499,9606.ENSP00000354554,9606.ENSP00000354632,9606.ENSP00000354665,9606.ENSP00000354876,9606.ENSP00000354961,9606.ENSP00000354982,9606.ENSP00000355046,9606.ENSP00000355265
PMID	PMID:35328076	(2022) The Complete Mitochondrial Genome of the Chicken Body Louse, Menacanthus cornutus, and Evolutionary Patterns of Extensive Gene Rearrangements in the Mitochondrial Genomes of Amblycera (Psocodea: Phthiraptera).	2.25e-15	9	12	MT-CO1,MT-CYB,MT-ATP6,MT-ND6,MT-CO2,MT-ND4,MT-CO3,MT-ND2,MT-ATP8	9606.ENSP00000354499,9606.ENSP00000354554,9606.ENSP00000354632,9606.ENSP00000354665,9606.ENSP00000354876,9606.ENSP00000354961,9606.ENSP00000354982,9606.ENSP00000355046,9606.ENSP00000355265
PMID	PMID:35379869	(2022) Comparative mitogenomics and phylogenetics of the family Carangidae with special emphasis on the mitogenome of the Indian Scad Decapterus russelli.	2.25e-15	9	15	MT-CO1,MT-CYB,MT-ATP6,MT-ND6,MT-CO2,MT-ND4,MT-CO3,MT-ND2,MT-ATP8	9606.ENSP00000354499,9606.ENSP00000354554,9606.ENSP00000354632,9606.ENSP00000354665,9606.ENSP00000354876,9606.ENSP00000354961,9606.ENSP00000354982,9606.ENSP00000355046,9606.ENSP00000355265
PMID	PMID:35386633	(2022) The complete mitochondrial genome of Pomadasys kaakan (Perciformes: Haemulidae).	2.25e-15	9	12	MT-CO1,MT-CYB,MT-ATP6,MT-ND6,MT-CO2,MT-ND4,MT-CO3,MT-ND2,MT-ATP8	9606.ENSP00000354499,9606.ENSP00000354554,9606.ENSP00000354632,9606.ENSP00000354665,9606.ENSP00000354876,9606.ENSP00000354961,9606.ENSP00000354982,9606.ENSP00000355046,9606.ENSP00000355265
PMID	PMID:35402707	(2022) Characterization and phylogenetic analysis of the complete mitochondrial genome of Sinocyclocheilus wenshanensis (Cypriniformes: Cyprinidae).	2.25e-15	9	12	MT-CO1,MT-CYB,MT-ATP6,MT-ND6,MT-CO2,MT-ND4,MT-CO3,MT-ND2,MT-ATP8	9606.ENSP00000354499,9606.ENSP00000354554,9606.ENSP00000354632,9606.ENSP00000354665,9606.ENSP00000354876,9606.ENSP00000354961,9606.ENSP00000354982,9606.ENSP00000355046,9606.ENSP00000355265
PMID	PMID:35402708	(2022) The complete mitochondrial genome of the Great evening bat Ia io (Chiroptera: Vespertiilionidae) from karst area, Southwestern China.	2.25e-15	9	12	MT-CO1,MT-CYB,MT-ATP6,MT-ND6,MT-CO2,MT-ND4,MT-CO3,MT-ND2,MT-ATP8	9606.ENSP00000354499,9606.ENSP00000354554,9606.ENSP00000354632,9606.ENSP00000354665,9606.ENSP00000354876,9606.ENSP00000354961,9606.ENSP00000354982,9606.ENSP00000355046,9606.ENSP00000355265
PMID	PMID:35886819	(2022) Mitogenomics of Chinch Bugs from China and Implications for Its Coevolutionary Relationship with Grasses.	2.25e-15	9	12	MT-CO1,MT-CYB,MT-ATP6,MT-ND6,MT-CO2,MT-ND4,MT-CO3,MT-ND2,MT-ATP8	9606.ENSP00000354499,9606.ENSP00000354554,9606.ENSP00000354632,9606.ENSP00000354665,9606.ENSP00000354876,9606.ENSP00000354961,9606.ENSP00000354982,9606.ENSP00000355046,9606.ENSP00000355265
PMID	PMID:33490591	(2021) Characterization of the complete mitochondrial genome of Ostorhinchus novemfasciatus and phylogenetic studies of Apogoninae.	2.25e-15	9	12	MT-CO1,MT-CYB,MT-ATP6,MT-ND6,MT-CO2,MT-ND4,MT-CO3,MT-ND2,MT-ATP8	9606.ENSP00000354499,9606.ENSP00000354554,9606.ENSP00000354632,9606.ENSP00000354665,9606.ENSP00000354876,9606.ENSP00000354961,9606.ENSP00000354982,9606.ENSP00000355046,9606.ENSP00000355265
PMID	PMID:33510193	(2021) Novel gene rearrangement in the mitochondrial genome of Muraenesox cinereus and the phylogenetic relationship of Anguilliformes.	2.25e-15	9	12	MT-CO1,MT-CYB,MT-ATP6,MT-ND6,MT-CO2,MT-ND4,MT-CO3,MT-ND2,MT-ATP8	9606.ENSP00000354499,9606.ENSP00000354554,9606.ENSP00000354632,9606.ENSP00000354665,9606.ENSP00000354876,9606.ENSP00000354961,9606.ENSP00000354982,9606.ENSP00000355046,9606.ENSP00000355265
PMID	PMID:33537415	(2021) The complete mitochondrial genome of Huainan partridge chicken (Gallus gallus).	2.25e-15	9	12	MT-CO1,MT-CYB,MT-ATP6,MT-ND6,MT-CO2,MT-ND4,MT-CO3,MT-ND2,MT-ATP8	9606.ENSP00000354499,9606.ENSP00000354554,9606.ENSP00000354632,9606.ENSP00000354665,9606.ENSP00000354876,9606.ENSP00000354961,9606.ENSP00000354982,9606.ENSP00000355046,9606.ENSP00000355265
PMID	PMID:33584111	(2021) Complete mitochondrial genome sequence of Lepus yarkandensis Gunther, 1875 (Lagomorpha, Leporidae): characterization and phylogenetic analysis.	2.25e-15	9	12	MT-CO1,MT-CYB,MT-ATP6,MT-ND6,MT-CO2,MT-ND4,MT-CO3,MT-ND2,MT-ATP8	9606.ENSP00000354499,9606.ENSP00000354554,9606.ENSP00000354632,9606.ENSP00000354665,9606.ENSP00000354876,9606.ENSP00000354961,9606.ENSP00000354982,9606.ENSP00000355046,9606.ENSP00000355265
PMID	PMID:33604160	(2021) Mitochondrial genomes of eight Scelimeninae species (Orthoptera) and their phylogenetic implications within Tetrigoidea.	2.25e-15	9	12	MT-CO1,MT-CYB,MT-ATP6,MT-ND6,MT-CO2,MT-ND4,MT-CO3,MT-ND2,MT-ATP8	9606.ENSP00000354499,9606.ENSP00000354554,9606.ENSP00000354632,9606.ENSP00000354665,9606.ENSP00000354876,9606.ENSP00000354961,9606.ENSP00000354982,9606.ENSP00000355046,9606.ENSP00000355265
PMID	PMID:33659645	(2021) Two complete mitochondrial genomes of the black-spotted stout newt (Pachytriton brevipes) and their relative phylogenetics relationship with other Salamandridae.	2.25e-15	9	12	MT-CO1,MT-CYB,MT-ATP6,MT-ND6,MT-CO2,MT-ND4,MT-CO3,MT-ND2,MT-ATP8	9606.ENSP00000354499,9606.ENSP00000354554,9606.ENSP00000354632,9606.ENSP00000354665,9606.ENSP00000354876,9606.ENSP00000354961,9606.ENSP00000354982,9606.ENSP00000355046,9606.ENSP00000355265
PMID	PMID:33659694	(2021) The complete mitochondrial genome of ribbed gunnel Dictyosoma burgeri (van der Hoeven, 1855).	2.25e-15	9	12	MT-CO1,MT-CYB,MT-ATP6,MT-ND6,MT-CO2,MT-ND4,MT-CO3,MT-ND2,MT-ATP8	9606.ENSP00000354499,9606.ENSP00000354554,9606.ENSP00000354632,9606.ENSP00000354665,9606.ENSP00000354876,9606.ENSP00000354961,9606.ENSP00000354982,9606.ENSP00000355046,9606.ENSP00000355265
PMID	PMID:33659700	(2021) The complete mitochondrial genome of an Asian warty newt, Paramesotriton aurantius (Caudata: Salamandridae).	2.25e-15	9	12	MT-CO1,MT-CYB,MT-ATP6,MT-ND6,MT-CO2,MT-ND4,MT-CO3,MT-ND2,MT-ATP8	9606.ENSP00000354499,9606.ENSP00000354554,9606.ENSP00000354632,9606.ENSP00000354665,9606.ENSP00000354876,9606.ENSP00000354961,9606.ENSP00000354982,9606.ENSP00000355046,9606.ENSP00000355265
PMID	PMID:33659703	(2021) Characterization of the complete mitochondrial genome of Chrysochir aureus and phylogenetic studies of Sciaenidae.	2.25e-15	9	12	MT-CO1,MT-CYB,MT-ATP6,MT-ND6,MT-CO2,MT-ND4,MT-CO3,MT-ND2,MT-ATP8	9606.ENSP00000354499,9606.ENSP00000354554,9606.ENSP00000354632,9606.ENSP00000354665,9606.ENSP00000354876,9606.ENSP00000354961,9606.ENSP00000354982,9606.ENSP00000355046,9606.ENSP00000355265
PMID	PMID:33763583	(2021) Mitochondrial genome of Diploderma micangshanense and its implications for phylogeny of the genus Diploderma.	2.25e-15	9	12	MT-CO1,MT-CYB,MT-ATP6,MT-ND6,MT-CO2,MT-ND4,MT-CO3,MT-ND2,MT-ATP8	9606.ENSP00000354499,9606.ENSP00000354554,9606.ENSP00000354632,9606.ENSP00000354665,9606.ENSP00000354876,9606.ENSP00000354961,9606.ENSP00000354982,9606.ENSP00000355046,9606.ENSP00000355265
PMID	PMID:33796659	(2021) First report of the mitogenome of Hamaxiella brunnescens (Diptera, Tachinidae) from Beijing, China.	2.25e-15	9	12	MT-CO1,MT-CYB,MT-ATP6,MT-ND6,MT-CO2,MT-ND4,MT-CO3,MT-ND2,MT-ATP8	9606.ENSP00000354499,9606.ENSP00000354554,9606.ENSP00000354632,9606.ENSP00000354665,9606.ENSP00000354876,9606.ENSP00000354961,9606.ENSP00000354982,9606.ENSP00000355046,9606.ENSP00000355265
PMID	PMID:33796682	(2021) The complete mitochondrial genome of Sarotherodon galilaeus (Linnaeus, 1758) (Perciformes: Cichlidae) and its phylogenetic placement.	2.25e-15	9	12	MT-CO1,MT-CYB,MT-ATP6,MT-ND6,MT-CO2,MT-ND4,MT-CO3,MT-ND2,MT-ATP8	9606.ENSP00000354499,9606.ENSP00000354554,9606.ENSP00000354632,9606.ENSP00000354665,9606.ENSP00000354876,9606.ENSP00000354961,9606.ENSP00000354982,9606.ENSP00000355046,9606.ENSP00000355265
PMID	PMID:33796713	(2021) The first complete mitochondrial DNA of the Chinese short-limbed skink (Ateuchosaurus chinensis Gray, 1845) determined by next-generation sequencing.	2.25e-15	9	12	MT-CO1,MT-CYB,MT-ATP6,MT-ND6,MT-CO2,MT-ND4,MT-CO3,MT-ND2,MT-ATP8	9606.ENSP00000354499,9606.ENSP00000354554,9606.ENSP00000354632,9606.ENSP00000354665,9606.ENSP00000354876,9606.ENSP00000354961,9606.ENSP00000354982,9606.ENSP00000355046,9606.ENSP00000355265
PMID	PMID:33796737	(2021) The complete mitochondrial genome of the pyrophilous jewel beetle Melanophila acuminata (Coleoptera: Buprestidae).	2.25e-15	9	12	MT-CO1,MT-CYB,MT-ATP6,MT-ND6,MT-CO2,MT-ND4,MT-CO3,MT-ND2,MT-ATP8	9606.ENSP00000354499,9606.ENSP00000354554,9606.ENSP00000354632,9606.ENSP00000354665,9606.ENSP00000354876,9606.ENSP00000354961,9606.ENSP00000354982,9606.ENSP00000355046,9606.ENSP00000355265
PMID	PMID:33796738	(2021) Characterization of the complete mitochondrial genome of the Chongan Moustache Toad, Leptobrachium liui (Pope, 1947) with a phylogenetic analysis of Megophryidae.	2.25e-15	9	12	MT-CO1,MT-CYB,MT-ATP6,MT-ND6,MT-CO2,MT-ND4,MT-CO3,MT-ND2,MT-ATP8	9606.ENSP00000354499,9606.ENSP00000354554,9606.ENSP00000354632,9606.ENSP00000354665,9606.ENSP00000354876,9606.ENSP00000354961,9606.ENSP00000354982,9606.ENSP00000355046,9606.ENSP00000355265
PMID	PMID:33796746	(2021) The complete mitochondrial genome of Sardinops sagax (Jenyns, 1842) (Clupeiformes: Clupeidae) and phylogenetic analyses of sardines.	2.25e-15	9	12	MT-CO1,MT-CYB,MT-ATP6,MT-ND6,MT-CO2,MT-ND4,MT-CO3,MT-ND2,MT-ATP8	9606.ENSP00000354499,9606.ENSP00000354554,9606.ENSP00000354632,9606.ENSP00000354665,9606.ENSP00000354876,9606.ENSP00000354961,9606.ENSP00000354982,9606.ENSP00000355046,9606.ENSP00000355265
PMID	PMID:33796760	(2021) Complete mitochondrial genome and phylogenetic analysis of Schizothorax sinensis (Teleostei: Cypriniformes: Cyprinidae).	2.25e-15	9	12	MT-CO1,MT-CYB,MT-ATP6,MT-ND6,MT-CO2,MT-ND4,MT-CO3,MT-ND2,MT-ATP8	9606.ENSP00000354499,9606.ENSP00000354554,9606.ENSP00000354632,9606.ENSP00000354665,9606.ENSP00000354876,9606.ENSP00000354961,9606.ENSP00000354982,9606.ENSP00000355046,9606.ENSP00000355265
PMID	PMID:33829087	(2021) The complete mitochondrial genome of a cave-dwelling loach Triplophysa baotianensis (Teleostei: Nemacheilidae).	2.25e-15	9	13	MT-CO1,MT-CYB,MT-ATP6,MT-ND6,MT-CO2,MT-ND4,MT-CO3,MT-ND2,MT-ATP8	9606.ENSP00000354499,9606.ENSP00000354554,9606.ENSP00000354632,9606.ENSP00000354665,9606.ENSP00000354876,9606.ENSP00000354961,9606.ENSP00000354982,9606.ENSP00000355046,9606.ENSP00000355265
PMID	PMID:33855185	(2021) The complete mitochondrial genome of Eclipophleps carinata (Orthoptera: Acridoidea: Gomphoceridae).	2.25e-15	9	13	MT-CO1,MT-CYB,MT-ATP6,MT-ND6,MT-CO2,MT-ND4,MT-CO3,MT-ND2,MT-ATP8	9606.ENSP00000354499,9606.ENSP00000354554,9606.ENSP00000354632,9606.ENSP00000354665,9606.ENSP00000354876,9606.ENSP00000354961,9606.ENSP00000354982,9606.ENSP00000355046,9606.ENSP00000355265
PMID	PMID:33855227	(2021) Molecular assessment of proteins encoded by the mitochondrial genome of Clarias batrachus and Clarias gariepinus.	2.25e-15	9	13	MT-CO1,MT-CYB,MT-ATP6,MT-ND6,MT-ND5,MT-CO2,MT-ND4,MT-CO3,MT-ND2	9606.ENSP00000354499,9606.ENSP00000354554,9606.ENSP00000354632,9606.ENSP00000354665,9606.ENSP00000354813,9606.ENSP00000354876,9606.ENSP00000354961,9606.ENSP00000354982,9606.ENSP00000355046
PMID	PMID:33895935	(2021) Mitochondrial nicotinamide adenine dinucleotide hydride dehydrogenase (NADH) subunit 4 (MTND4) polymorphisms and their association with male infertility.	2.25e-15	9	13	MT-CO1,MT-CYB,MT-ATP6,MT-ND6,MT-CO2,MT-ND4,MT-CO3,MT-ND2,MT-ATP8	9606.ENSP00000354499,9606.ENSP00000354554,9606.ENSP00000354632,9606.ENSP00000354665,9606.ENSP00000354876,9606.ENSP00000354961,9606.ENSP00000354982,9606.ENSP00000355046,9606.ENSP00000355265
PMID	PMID:33911915	(2021) Complete mitochondrial DNA sequence of the Psammocora profundacella (Scleractinia, Psammocoridae): mitogenome characterisation and phylogenetic implications.	2.25e-15	9	12	MT-CO1,MT-CYB,MT-ATP6,MT-ND6,MT-CO2,MT-ND4,MT-CO3,MT-ND2,MT-ATP8	9606.ENSP00000354499,9606.ENSP00000354554,9606.ENSP00000354632,9606.ENSP00000354665,9606.ENSP00000354876,9606.ENSP00000354961,9606.ENSP00000354982,9606.ENSP00000355046,9606.ENSP00000355265
PMID	PMID:33986976	(2021) Mitogenomics of five Olidiana leafhoppers (Hemiptera: Cicadellidae: Coelidiinae) and their phylogenetic implications.	2.25e-15	9	14	MT-CO1,MT-CYB,MT-ATP6,MT-ND6,MT-CO2,MT-ND4,MT-CO3,MT-ND2,MT-ATP8	9606.ENSP00000354499,9606.ENSP00000354554,9606.ENSP00000354632,9606.ENSP00000354665,9606.ENSP00000354876,9606.ENSP00000354961,9606.ENSP00000354982,9606.ENSP00000355046,9606.ENSP00000355265
PMID	PMID:34027068	(2021) The complete mitogenome and phylogenetic analysis of Indian driftfish, Cubiceps squamiceps (Scombriformes: Nomeidae).	2.25e-15	9	12	MT-CO1,MT-CYB,MT-ATP6,MT-ND6,MT-CO2,MT-ND4,MT-CO3,MT-ND2,MT-ATP8	9606.ENSP00000354499,9606.ENSP00000354554,9606.ENSP00000354632,9606.ENSP00000354665,9606.ENSP00000354876,9606.ENSP00000354961,9606.ENSP00000354982,9606.ENSP00000355046,9606.ENSP00000355265
PMID	PMID:34027069	(2021) The complete mitochondrial genome sequence and phylogenetic position of Sinocyclocheilus xiaotunensis (Cypriniformes: Cyprinidae).	2.25e-15	9	12	MT-CO1,MT-CYB,MT-ATP6,MT-ND6,MT-CO2,MT-ND4,MT-CO3,MT-ND2,MT-ATP8	9606.ENSP00000354499,9606.ENSP00000354554,9606.ENSP00000354632,9606.ENSP00000354665,9606.ENSP00000354876,9606.ENSP00000354961,9606.ENSP00000354982,9606.ENSP00000355046,9606.ENSP00000355265
PMID	PMID:34104749	(2021) The complete mitochondrial genome of Abramites hypselonotus (Gunther, 1868) (Ostariophysi: Characiformes: Anostomidae): an aquarium headstander.	2.25e-15	9	12	MT-CO1,MT-CYB,MT-ATP6,MT-ND6,MT-CO2,MT-ND4,MT-CO3,MT-ND2,MT-ATP8	9606.ENSP00000354499,9606.ENSP00000354554,9606.ENSP00000354632,9606.ENSP00000354665,9606.ENSP00000354876,9606.ENSP00000354961,9606.ENSP00000354982,9606.ENSP00000355046,9606.ENSP00000355265
PMID	PMID:34149293	(2021) The mitochondrial genome and phylogenetic characteristics of the Thick-billed Green-Pigeon, Treron curvirostra: the first sequence for the genus.	2.25e-15	9	12	MT-CO1,MT-CYB,MT-ATP6,MT-ND6,MT-CO2,MT-ND4,MT-CO3,MT-ND2,MT-ATP8	9606.ENSP00000354499,9606.ENSP00000354554,9606.ENSP00000354632,9606.ENSP00000354665,9606.ENSP00000354876,9606.ENSP00000354961,9606.ENSP00000354982,9606.ENSP00000355046,9606.ENSP00000355265
PMID	PMID:34151021	(2021) The complete mitochondrial genome of Platycephalus sp.1 (Teleostei, Platycephalidae) obtained by whole genome sequencing.	2.25e-15	9	13	MT-CO1,MT-CYB,MT-ATP6,MT-ND6,MT-CO2,MT-ND4,MT-CO3,MT-ND2,MT-ATP8	9606.ENSP00000354499,9606.ENSP00000354554,9606.ENSP00000354632,9606.ENSP00000354665,9606.ENSP00000354876,9606.ENSP00000354961,9606.ENSP00000354982,9606.ENSP00000355046,9606.ENSP00000355265
PMID	PMID:34286081	(2021) The complete mitochondrial genome of Chinese minnow (Rhynchocypris oxycephalus) and its phylogenetic analyses.	2.25e-15	9	12	MT-CO1,MT-CYB,MT-ATP6,MT-ND6,MT-CO2,MT-ND4,MT-CO3,MT-ND2,MT-ATP8	9606.ENSP00000354499,9606.ENSP00000354554,9606.ENSP00000354632,9606.ENSP00000354665,9606.ENSP00000354876,9606.ENSP00000354961,9606.ENSP00000354982,9606.ENSP00000355046,9606.ENSP00000355265
PMID	PMID:34311468	(2021) Genomic Evidence for Speciation with Gene Flow in Broadcast Spawning Marine Invertebrates.	2.25e-15	9	15	MT-CO1,MT-CYB,MT-ATP6,MT-ND6,MT-CO2,MT-ND4,MT-CO3,MT-ND2,MT-ATP8	9606.ENSP00000354499,9606.ENSP00000354554,9606.ENSP00000354632,9606.ENSP00000354665,9606.ENSP00000354876,9606.ENSP00000354961,9606.ENSP00000354982,9606.ENSP00000355046,9606.ENSP00000355265
PMID	PMID:34337412	(2021) The spectrum of mitochondrial DNA (mtDNA) mutations in pediatric CNS tumors.	2.25e-15	9	15	MT-CO1,MT-CYB,MT-ND6,MT-ND5,MT-CO2,MT-ND4,MT-CO3,MT-ND2,MT-ATP8	9606.ENSP00000354499,9606.ENSP00000354554,9606.ENSP00000354665,9606.ENSP00000354813,9606.ENSP00000354876,9606.ENSP00000354961,9606.ENSP00000354982,9606.ENSP00000355046,9606.ENSP00000355265
PMID	PMID:34345699	(2021) Determination of the complete mitochondrial genome of Pseudobagrus gracilis (Siluriformes: Bagridae) and its phylogeny.	2.25e-15	9	12	MT-CO1,MT-CYB,MT-ATP6,MT-ND6,MT-CO2,MT-ND4,MT-CO3,MT-ND2,MT-ATP8	9606.ENSP00000354499,9606.ENSP00000354554,9606.ENSP00000354632,9606.ENSP00000354665,9606.ENSP00000354876,9606.ENSP00000354961,9606.ENSP00000354982,9606.ENSP00000355046,9606.ENSP00000355265

## Sheet: All w Amplitude Increase
STRINGoutput_All genes with amplitude increased (q < 0.05)
#category	term ID	term description	false discovery rate	observed gene count	background gene count	matching proteins in your network (labels)	matching proteins in your network (IDs)

## Sheet: Rhythmic w MESOR Decreased
STRINGoutput_Genes rhythmic (weighted BIC > 0.75) in young and old with mesor decreased (q < 0.05)
#category	term ID	term description	false discovery rate	observed gene count	background gene count	matching proteins in your network (labels)	matching proteins in your network (IDs)
GO Process	GO:0007049	Cell cycle	2.11e-41	123	1313	CDC6,MCM5,POLE2,AURKA,ERF,FBXO5,NR3C1,MSH2,MSH6,CDC25B,DLGAP5,YEATS4,NASP,CCNB1,CDK4,USP37,BRIP1,TIPIN,MCM4,GINS1,POLD3,MCM6,PPAT,MCM2,CENPE,NBN,NUF2,NPAT,CEP164,CABLES2,HAUS1,RIOK2,HNRNPU,CCNB2,BAX,RAD21,PLK1,CDT1,CHAF1A,BIRC5,BUB1,CDC25A,FEN1,ESCO2,MCM7,CLSPN,ATAD5,KHDRBS1,CHAF1B,TLK2,RMI1,CDC25C,DSCC1,E2F7,DBF4B,NCAPD2,CUL1,CDKN3,CENPQ,LIN54,E2F1,PRKAA1,PRIM1,DNA2,NAE1,XRCC2,PCNT,MCMBP,WDHD1,I…	9606.ENSP00000209728,9606.ENSP00000216122,9606.ENSP00000216367,9606.ENSP00000216911,9606.ENSP00000222329,9606.ENSP00000229758,9606.ENSP00000231509,9606.ENSP00000233146,9606.ENSP00000234420,9606.ENSP00000245960,9606.ENSP00000247191,9606.ENSP00000247843,9606.ENSP00000255120,9606.ENSP00000256442,9606.ENSP00000257904,9606.ENSP00000258399,9606.ENSP00000259008,9606.ENSP00000261881,9606.ENSP00000262105,…
GO Process	GO:0090304	Nucleic acid metabolic process	9.14e-41	155	2178	TARBP1,CDC6,MCM5,POLE2,HNRNPL,FRG1,NR3C1,RRP9,MSH2,MSH6,UNG,SNRPA,GINS2,FUS,CCNB1,DDB2,NAT10,CDK4,BRIP1,TGS1,PPIG,LOC81691,RNF138,UTP20,TIPIN,MCM4,GINS1,POLD3,MCM6,RAD18,MCM2,NBN,HNRNPH3,CPSF6,NAF1,MMS22L,CEP164,FARSB,ZFP36L2,RIOK2,HNRNPU,TSEN2,EXOG,BAX,HMGB2,TRA2A,RAD21,NOL6,CHAF1A,GTPBP2,FEN1,ESCO2,MCM7,WDR3,C10orf2,RMI2,CLSPN,ATAD5,KHDRBS1,CHAF1B,RMI1,SNRNP200,DCTPP1,WDR33,CIRH1A,PIF1,NDNL2,CS…	9606.ENSP00000040877,9606.ENSP00000209728,9606.ENSP00000216122,9606.ENSP00000216367,9606.ENSP00000221419,9606.ENSP00000226798,9606.ENSP00000231509,9606.ENSP00000232888,9606.ENSP00000233146,9606.ENSP00000234420,9606.ENSP00000242576,9606.ENSP00000243563,9606.ENSP00000253462,9606.ENSP00000254108,9606.ENSP00000256442,9606.ENSP00000256996,9606.ENSP00000257829,9606.ENSP00000257904,9606.ENSP00000259008,…
GO Process	GO:0006139	Nucleobase-containing compound metabolic process	1.43e-37	166	2659	TARBP1,CDC6,ATP5D,MCM5,POLE2,HNRNPL,FRG1,NR3C1,RRP9,MSH2,MSH6,UNG,SNRPA,GINS2,FUS,CCNB1,DDB2,NAT10,CDK4,BRIP1,TGS1,PPIG,LOC81691,RNF138,UTP20,TIPIN,MCM4,GINS1,EED,POLD3,MCM6,PPAT,RAD18,MCM2,NBN,HNRNPH3,CPSF6,NAF1,MMS22L,CEP164,FARSB,ZFP36L2,RIOK2,HNRNPU,TSEN2,DCK,EXOG,BAX,HMGB2,TRA2A,RAD21,NOL6,CHAF1A,GTPBP2,FEN1,ESCO2,MCM7,WDR3,C10orf2,RMI2,CLSPN,ATAD5,KHDRBS1,CHAF1B,RMI1,SNRNP200,IMPDH2,DCTPP1,…	9606.ENSP00000040877,9606.ENSP00000209728,9606.ENSP00000215375,9606.ENSP00000216122,9606.ENSP00000216367,9606.ENSP00000221419,9606.ENSP00000226798,9606.ENSP00000231509,9606.ENSP00000232888,9606.ENSP00000233146,9606.ENSP00000234420,9606.ENSP00000242576,9606.ENSP00000243563,9606.ENSP00000253462,9606.ENSP00000254108,9606.ENSP00000256442,9606.ENSP00000256996,9606.ENSP00000257829,9606.ENSP00000257904,…
GO Process	GO:0022402	Cell cycle process	1.88e-37	102	976	CDC6,MCM5,POLE2,AURKA,FBXO5,MSH2,MSH6,CDC25B,DLGAP5,NASP,CCNB1,CDK4,USP37,BRIP1,TIPIN,MCM4,GINS1,POLD3,MCM6,PPAT,MCM2,CENPE,NBN,NUF2,NPAT,CEP164,HAUS1,CCNB2,BAX,RAD21,PLK1,CDT1,BIRC5,BUB1,CDC25A,FEN1,ESCO2,MCM7,CLSPN,ATAD5,KHDRBS1,RMI1,CDC25C,DSCC1,E2F7,NCAPD2,CUL1,CDKN3,CENPQ,E2F1,PRKAA1,PRIM1,DNA2,NAE1,XRCC2,PCNT,MCMBP,IQGAP3,CHAMP1,CENPF,NEK2,KIF14,ASPM,NES,DCLRE1B,PSRC1,ORC1,RAD54L,KIF2C,CNTR…	9606.ENSP00000209728,9606.ENSP00000216122,9606.ENSP00000216367,9606.ENSP00000216911,9606.ENSP00000229758,9606.ENSP00000233146,9606.ENSP00000234420,9606.ENSP00000245960,9606.ENSP00000247191,9606.ENSP00000255120,9606.ENSP00000256442,9606.ENSP00000257904,9606.ENSP00000258399,9606.ENSP00000259008,9606.ENSP00000261881,9606.ENSP00000262105,9606.ENSP00000262460,9606.ENSP00000263681,9606.ENSP00000264156,…
GO Process	GO:0046483	Heterocycle metabolic process	2.55e-37	171	2840	TARBP1,CDC6,ATP5D,MCM5,POLE2,PYCRL,HNRNPL,FRG1,NR3C1,RRP9,MSH2,MSH6,UNG,SNRPA,GINS2,FUS,CCNB1,DDB2,NAT10,CDK4,RSAD1,BRIP1,TGS1,PPIG,LOC81691,RNF138,UTP20,TIPIN,MCM4,GINS1,EED,POLD3,MCM6,PPAT,RAD18,MCM2,NBN,HNRNPH3,CPSF6,NAF1,MMS22L,CEP164,FARSB,ZFP36L2,RIOK2,HNRNPU,TSEN2,DCK,EXOG,BAX,HMGB2,TRA2A,RAD21,NOL6,CHAF1A,GTPBP2,FEN1,ESCO2,MCM7,WDR3,SLC19A1,C10orf2,RMI2,CLSPN,ATAD5,KHDRBS1,CHAF1B,RMI1,SNR…	9606.ENSP00000040877,9606.ENSP00000209728,9606.ENSP00000215375,9606.ENSP00000216122,9606.ENSP00000216367,9606.ENSP00000220966,9606.ENSP00000221419,9606.ENSP00000226798,9606.ENSP00000231509,9606.ENSP00000232888,9606.ENSP00000233146,9606.ENSP00000234420,9606.ENSP00000242576,9606.ENSP00000243563,9606.ENSP00000253462,9606.ENSP00000254108,9606.ENSP00000256442,9606.ENSP00000256996,9606.ENSP00000257829,…
GO Process	GO:0006725	Cellular aromatic compound metabolic process	5.59e-36	170	2882	TARBP1,CDC6,ATP5D,MCM5,POLE2,HNRNPL,FRG1,NR3C1,RRP9,MSH2,MSH6,UNG,SNRPA,GINS2,FUS,CCNB1,DDB2,NAT10,CDK4,RSAD1,BRIP1,TGS1,PPIG,LOC81691,RNF138,UTP20,TIPIN,MCM4,GINS1,EED,POLD3,MCM6,PPAT,RAD18,MCM2,NBN,HNRNPH3,CPSF6,NAF1,MMS22L,CEP164,FARSB,ZFP36L2,RIOK2,HNRNPU,TSEN2,DCK,EXOG,BAX,HMGB2,TRA2A,RAD21,NOL6,CHAF1A,GTPBP2,FEN1,ESCO2,MCM7,WDR3,SLC19A1,C10orf2,RMI2,CLSPN,ATAD5,KHDRBS1,CHAF1B,RMI1,SNRNP200,…	9606.ENSP00000040877,9606.ENSP00000209728,9606.ENSP00000215375,9606.ENSP00000216122,9606.ENSP00000216367,9606.ENSP00000221419,9606.ENSP00000226798,9606.ENSP00000231509,9606.ENSP00000232888,9606.ENSP00000233146,9606.ENSP00000234420,9606.ENSP00000242576,9606.ENSP00000243563,9606.ENSP00000253462,9606.ENSP00000254108,9606.ENSP00000256442,9606.ENSP00000256996,9606.ENSP00000257829,9606.ENSP00000257904,…
GO Process	GO:0000278	Mitotic cell cycle	2.27e-34	84	695	CDC6,MCM5,POLE2,AURKA,ERF,FBXO5,MSH2,CDC25B,DLGAP5,YEATS4,NASP,CCNB1,CDK4,USP37,TIPIN,MCM4,GINS1,MCM6,PPAT,MCM2,CENPE,NBN,NUF2,NPAT,CEP164,HAUS1,CCNB2,BAX,PLK1,CDT1,BIRC5,BUB1,CDC25A,MCM7,CLSPN,KHDRBS1,CDC25C,DSCC1,E2F7,NCAPD2,CUL1,CDKN3,E2F1,PRIM1,DNA2,NAE1,XRCC2,PCNT,WDHD1,IQGAP3,CHAMP1,CENPF,NEK2,KIF14,NES,DCLRE1B,PSRC1,ORC1,KIF2C,CNTRL,TFDP1,PCNA,CNTROB,CIT,CDKN2D,PRC1,KIF20A,CCNF,RBBP8,NOLC1…	9606.ENSP00000209728,9606.ENSP00000216122,9606.ENSP00000216367,9606.ENSP00000216911,9606.ENSP00000222329,9606.ENSP00000229758,9606.ENSP00000233146,9606.ENSP00000245960,9606.ENSP00000247191,9606.ENSP00000247843,9606.ENSP00000255120,9606.ENSP00000256442,9606.ENSP00000257904,9606.ENSP00000258399,9606.ENSP00000261881,9606.ENSP00000262105,9606.ENSP00000262460,9606.ENSP00000264156,9606.ENSP00000264220,…
GO Process	GO:0006260	DNA replication	1.1e-33	52	205	CDC6,MCM5,POLE2,GINS2,NASP,BRIP1,TIPIN,MCM4,GINS1,POLD3,MCM6,MCM2,NBN,MMS22L,CDT1,CHAF1A,FEN1,MCM7,C10orf2,RMI2,CLSPN,ATAD5,CHAF1B,RMI1,DSCC1,PIF1,PRIM1,DNA2,MCMBP,WDHD1,EXO1,DTL,ORC1,PCNA,RFC3,RFC1,RFC4,SLFN11,RBBP8,TONSL,CHEK1,CDC45,POLD1,REPIN1,MCM10,BRCA1,CCNE2,FAM111A,DDX11,NAP1L1,MCM3,PRIM2	9606.ENSP00000209728,9606.ENSP00000216122,9606.ENSP00000216367,9606.ENSP00000253462,9606.ENSP00000255120,9606.ENSP00000259008,9606.ENSP00000261881,9606.ENSP00000262105,9606.ENSP00000262460,9606.ENSP00000263681,9606.ENSP00000264156,9606.ENSP00000265056,9606.ENSP00000265433,9606.ENSP00000275053,9606.ENSP00000301019,9606.ENSP00000301280,9606.ENSP00000305480,9606.ENSP00000307288,9606.ENSP00000309595,…
GO Process	GO:0034641	Cellular nitrogen compound metabolic process	1.1e-33	178	3282	TARBP1,CDC6,ATP5D,MCM5,POLE2,HNRNPL,FRG1,NR3C1,RRP9,MSH2,MSH6,UNG,SNRPA,DHX29,GINS2,FUS,CCNB1,DDB2,NAT10,CDK4,RSAD1,BRIP1,TGS1,PPIG,LOC81691,RNF138,UTP20,TIPIN,MCM4,GINS1,EED,POLD3,MCM6,PPAT,RAD18,MRPL3,MCM2,NBN,HNRNPH3,CPSF6,NAF1,MMS22L,CEP164,FARSB,ZFP36L2,RIOK2,HNRNPU,TSEN2,DCK,EXOG,EIF5B,BAX,HMGB2,ABCE1,TRA2A,RAD21,NOL6,CHAF1A,GTPBP2,FEN1,ESCO2,MCM7,WDR3,SLC19A1,C10orf2,RMI2,CLSPN,ATAD5,KHDRB…	9606.ENSP00000040877,9606.ENSP00000209728,9606.ENSP00000215375,9606.ENSP00000216122,9606.ENSP00000216367,9606.ENSP00000221419,9606.ENSP00000226798,9606.ENSP00000231509,9606.ENSP00000232888,9606.ENSP00000233146,9606.ENSP00000234420,9606.ENSP00000242576,9606.ENSP00000243563,9606.ENSP00000251636,9606.ENSP00000253462,9606.ENSP00000254108,9606.ENSP00000256442,9606.ENSP00000256996,9606.ENSP00000257829,…
GO Process	GO:1901360	Organic cyclic compound metabolic process	1.1e-33	173	3118	TARBP1,CDC6,ATP5D,MCM5,POLE2,PYCRL,HNRNPL,FRG1,NR3C1,RRP9,MSH2,MSH6,UNG,SNRPA,GINS2,FUS,CCNB1,DDB2,NAT10,CDK4,RSAD1,BRIP1,TGS1,PPIG,LOC81691,RNF138,UTP20,TIPIN,MCM4,GINS1,EED,POLD3,MCM6,PPAT,RAD18,MCM2,NBN,HNRNPH3,CPSF6,NAF1,MMS22L,CEP164,FARSB,ZFP36L2,RIOK2,HNRNPU,TSEN2,DCK,EXOG,BAX,HMGB2,TRA2A,RAD21,NOL6,CHAF1A,GTPBP2,FEN1,ESCO2,MCM7,WDR3,SLC19A1,C10orf2,RMI2,CLSPN,ATAD5,KHDRBS1,CHAF1B,RMI1,SNR…	9606.ENSP00000040877,9606.ENSP00000209728,9606.ENSP00000215375,9606.ENSP00000216122,9606.ENSP00000216367,9606.ENSP00000220966,9606.ENSP00000221419,9606.ENSP00000226798,9606.ENSP00000231509,9606.ENSP00000232888,9606.ENSP00000233146,9606.ENSP00000234420,9606.ENSP00000242576,9606.ENSP00000243563,9606.ENSP00000253462,9606.ENSP00000254108,9606.ENSP00000256442,9606.ENSP00000256996,9606.ENSP00000257829,…
GO Process	GO:1903047	Mitotic cell cycle process	3.02e-32	77	616	CDC6,MCM5,POLE2,AURKA,FBXO5,MSH2,CDC25B,DLGAP5,NASP,CCNB1,CDK4,USP37,TIPIN,MCM4,GINS1,MCM6,PPAT,MCM2,CENPE,NBN,NUF2,NPAT,CEP164,HAUS1,CCNB2,BAX,PLK1,CDT1,BIRC5,BUB1,CDC25A,MCM7,CLSPN,KHDRBS1,CDC25C,DSCC1,E2F7,NCAPD2,CUL1,CDKN3,E2F1,PRIM1,DNA2,NAE1,PCNT,IQGAP3,CHAMP1,CENPF,NEK2,KIF14,NES,DCLRE1B,PSRC1,ORC1,KIF2C,CNTRL,TFDP1,PCNA,CNTROB,CIT,CDKN2D,PRC1,KIF20A,CCNF,RBBP8,DSN1,ODF2,CDC45,TOP2A,MCM10,…	9606.ENSP00000209728,9606.ENSP00000216122,9606.ENSP00000216367,9606.ENSP00000216911,9606.ENSP00000229758,9606.ENSP00000233146,9606.ENSP00000245960,9606.ENSP00000247191,9606.ENSP00000255120,9606.ENSP00000256442,9606.ENSP00000257904,9606.ENSP00000258399,9606.ENSP00000261881,9606.ENSP00000262105,9606.ENSP00000262460,9606.ENSP00000264156,9606.ENSP00000264220,9606.ENSP00000265056,9606.ENSP00000265148,…
GO Process	GO:0006974	Cellular response to dna damage stimulus	5.38e-30	83	793	MCM5,POLE2,AURKA,MSH2,MSH6,UNG,GINS2,CCNB1,DDB2,BRIP1,RNF138,TIPIN,MCM4,POLD3,WDR76,MCM6,RAD18,MCM2,NBN,MMS22L,CEP164,BAX,HMGB2,RAD21,PLK1,CHAF1A,FEN1,ESCO2,MCM7,RMI2,CLSPN,ATAD5,CHAF1B,TLK2,RMI1,CDC25C,E2F7,WDR33,PMAIP1,PIF1,NDNL2,C17orf70,HMGB1,E2F1,DNA2,XRCC2,WDHD1,FAN1,EXO1,PARP1,DTL,INTS7,ASCC3,DCLRE1B,RAD54L,APEX2,TFDP1,PCNA,RFC3,HMGN1,RFC1,RFC4,CDKN2D,PTTG1,SLFN11,RBBP8,PAXIP1,PSME4,TONSL,…	9606.ENSP00000216122,9606.ENSP00000216367,9606.ENSP00000216911,9606.ENSP00000233146,9606.ENSP00000234420,9606.ENSP00000242576,9606.ENSP00000253462,9606.ENSP00000256442,9606.ENSP00000256996,9606.ENSP00000259008,9606.ENSP00000261593,9606.ENSP00000261881,9606.ENSP00000262105,9606.ENSP00000263681,9606.ENSP00000263795,9606.ENSP00000264156,9606.ENSP00000264926,9606.ENSP00000265056,9606.ENSP00000265433,…
GO Process	GO:0006259	DNA metabolic process	2.54e-29	80	750	CDC6,MCM5,POLE2,MSH2,MSH6,UNG,GINS2,DDB2,BRIP1,RNF138,TIPIN,MCM4,GINS1,POLD3,MCM6,RAD18,MCM2,NBN,MMS22L,CEP164,EXOG,HMGB2,RAD21,CHAF1A,FEN1,ESCO2,MCM7,RMI2,CLSPN,ATAD5,CHAF1B,RMI1,DCTPP1,WDR33,PIF1,NDNL2,C17orf70,H1F0,HMGB1,PRIM1,DNA2,XRCC2,WDHD1,FAN1,EXO1,PARP1,CENPF,DTL,ASCC3,DCLRE1B,ORC1,RAD54L,APEX2,PCNA,RFC3,HMGN1,RFC1,RFC4,CDKN2D,PTTG1,HELLS,SLFN11,RBBP8,PAXIP1,PSME4,TONSL,CHEK1,ALKBH2,CDC4…	9606.ENSP00000209728,9606.ENSP00000216122,9606.ENSP00000216367,9606.ENSP00000233146,9606.ENSP00000234420,9606.ENSP00000242576,9606.ENSP00000253462,9606.ENSP00000256996,9606.ENSP00000259008,9606.ENSP00000261593,9606.ENSP00000261881,9606.ENSP00000262105,9606.ENSP00000262460,9606.ENSP00000263681,9606.ENSP00000264156,9606.ENSP00000264926,9606.ENSP00000265056,9606.ENSP00000265433,9606.ENSP00000275053,…
GO Process	GO:0051276	Chromosome organization	1.84e-28	93	1066	MCM5,POLE2,AURKA,NR3C1,MSH2,DLGAP5,YEATS4,GINS2,SMARCC1,NASP,CCNB1,DDB2,BRIP1,MCM4,EED,POLD3,MCM6,RAD18,MCM2,CENPE,NBN,NUF2,HNRNPU,ATAD2,HMGB2,RAD21,PLK1,CDT1,CHAF1A,BUB1,FEN1,ESCO2,MCM7,CBX2,C10orf2,RMI2,CHAF1B,TLK2,DSCC1,NCAPD2,PIF1,MINA,H1FX,CENPQ,GTF2F2,H1F0,HMGB1,PRKAA1,HNRNPA2B1,PRIM1,DNA2,MCMBP,CHAMP1,EXO1,PARP1,CENPF,NEK2,KIF14,ASCC3,DCLRE1B,PSRC1,RAD54L,KIF2C,RBL1,PCNA,RFC3,HMGN1,RFC1,RF…	9606.ENSP00000216122,9606.ENSP00000216367,9606.ENSP00000216911,9606.ENSP00000231509,9606.ENSP00000233146,9606.ENSP00000247191,9606.ENSP00000247843,9606.ENSP00000253462,9606.ENSP00000254480,9606.ENSP00000255120,9606.ENSP00000256442,9606.ENSP00000256996,9606.ENSP00000259008,9606.ENSP00000262105,9606.ENSP00000263360,9606.ENSP00000263681,9606.ENSP00000264156,9606.ENSP00000264926,9606.ENSP00000265056,…
GO Process	GO:0044770	Cell cycle phase transition	9.79e-26	50	289	CDC6,MCM5,POLE2,AURKA,FBXO5,CDC25B,NASP,CCNB1,CDK4,USP37,TIPIN,MCM4,MCM6,PPAT,MCM2,NPAT,CEP164,HAUS1,CCNB2,PLK1,CDT1,BIRC5,CDC25A,MCM7,KHDRBS1,CDC25C,E2F7,CUL1,CDKN3,E2F1,PRIM1,PCNT,IQGAP3,NEK2,NES,ORC1,CNTRL,TFDP1,PCNA,CDKN2D,CCNF,RBBP8,ODF2,CDC45,MCM10,CCNE2,CKAP5,BORA,MCM3,PRIM2	9606.ENSP00000209728,9606.ENSP00000216122,9606.ENSP00000216367,9606.ENSP00000216911,9606.ENSP00000229758,9606.ENSP00000245960,9606.ENSP00000255120,9606.ENSP00000256442,9606.ENSP00000257904,9606.ENSP00000258399,9606.ENSP00000261881,9606.ENSP00000262105,9606.ENSP00000264156,9606.ENSP00000264220,9606.ENSP00000265056,9606.ENSP00000278612,9606.ENSP00000278935,9606.ENSP00000282058,9606.ENSP00000288207,…
GO Process	GO:0044772	Mitotic cell cycle phase transition	2.12e-25	49	280	CDC6,MCM5,POLE2,AURKA,FBXO5,CDC25B,NASP,CCNB1,CDK4,USP37,MCM4,MCM6,PPAT,MCM2,NPAT,CEP164,HAUS1,CCNB2,PLK1,CDT1,BIRC5,CDC25A,MCM7,KHDRBS1,CDC25C,E2F7,CUL1,CDKN3,E2F1,PRIM1,PCNT,IQGAP3,NEK2,NES,ORC1,CNTRL,TFDP1,PCNA,CDKN2D,CCNF,RBBP8,ODF2,CDC45,MCM10,CCNE2,CKAP5,BORA,MCM3,PRIM2	9606.ENSP00000209728,9606.ENSP00000216122,9606.ENSP00000216367,9606.ENSP00000216911,9606.ENSP00000229758,9606.ENSP00000245960,9606.ENSP00000255120,9606.ENSP00000256442,9606.ENSP00000257904,9606.ENSP00000258399,9606.ENSP00000262105,9606.ENSP00000264156,9606.ENSP00000264220,9606.ENSP00000265056,9606.ENSP00000278612,9606.ENSP00000278935,9606.ENSP00000282058,9606.ENSP00000288207,9606.ENSP00000300093,…
GO Process	GO:0006281	DNA repair	3.54e-25	63	522	MCM5,POLE2,MSH2,MSH6,UNG,GINS2,DDB2,BRIP1,RNF138,MCM4,POLD3,MCM6,RAD18,MCM2,NBN,MMS22L,CEP164,HMGB2,RAD21,CHAF1A,FEN1,ESCO2,MCM7,RMI2,CLSPN,CHAF1B,RMI1,WDR33,PIF1,NDNL2,C17orf70,HMGB1,DNA2,XRCC2,WDHD1,FAN1,EXO1,PARP1,DTL,ASCC3,DCLRE1B,RAD54L,APEX2,PCNA,RFC3,HMGN1,RFC1,RFC4,CDKN2D,PTTG1,RBBP8,PAXIP1,PSME4,TONSL,CHEK1,ALKBH2,CDC45,POLD1,BRCA1,DDX11,GTF2H3,UHRF1,MCM3	9606.ENSP00000216122,9606.ENSP00000216367,9606.ENSP00000233146,9606.ENSP00000234420,9606.ENSP00000242576,9606.ENSP00000253462,9606.ENSP00000256996,9606.ENSP00000259008,9606.ENSP00000261593,9606.ENSP00000262105,9606.ENSP00000263681,9606.ENSP00000264156,9606.ENSP00000264926,9606.ENSP00000265056,9606.ENSP00000265433,9606.ENSP00000275053,9606.ENSP00000278935,9606.ENSP00000296503,9606.ENSP00000297338,…
GO Process	GO:0006261	DNA-dependent DNA replication	5.73e-23	34	119	CDC6,MCM5,POLE2,GINS2,TIPIN,MCM4,GINS1,POLD3,MCM6,MCM2,MMS22L,CDT1,FEN1,MCM7,C10orf2,ATAD5,PRIM1,DNA2,MCMBP,WDHD1,ORC1,PCNA,RFC3,RFC1,RFC4,SLFN11,TONSL,CDC45,POLD1,MCM10,CCNE2,DDX11,MCM3,PRIM2	9606.ENSP00000209728,9606.ENSP00000216122,9606.ENSP00000216367,9606.ENSP00000253462,9606.ENSP00000261881,9606.ENSP00000262105,9606.ENSP00000262460,9606.ENSP00000263681,9606.ENSP00000264156,9606.ENSP00000265056,9606.ENSP00000275053,9606.ENSP00000301019,9606.ENSP00000305480,9606.ENSP00000307288,9606.ENSP00000309595,9606.ENSP00000313171,9606.ENSP00000350491,9606.ENSP00000351185,9606.ENSP00000353098,…
GO Process	GO:0043170	Macromolecule metabolic process	1.91e-20	224	6137	TARBP1,CAMKK1,CDC6,MCM5,POLE2,AURKA,HNRNPL,FRG1,KITLG,FBXO5,NR3C1,RRP9,MSH2,MSH6,UNG,SNRPA,CDC25B,YEATS4,DHX29,GINS2,FUS,NASP,CCNB1,IRAK2,DDB2,NAT10,CDK4,USP37,BRIP1,TGS1,PPIG,LOC81691,RNF138,UTP20,MPP5,TIPIN,MCM4,GINS1,EED,POLD3,MCM6,RAD18,MRPL3,MCM2,NBN,HNRNPH3,CPSF6,NAF1,MMS22L,PM20D2,CEP164,FARSB,ZFP36L2,RIOK2,HNRNPU,TSEN2,MMP16,EXOG,EIF5B,BAX,HMGB2,ABCE1,TRA2A,RAD21,NOL6,PLK1,CDT1,CHAF1A,BIR…	9606.ENSP00000040877,9606.ENSP00000158166,9606.ENSP00000209728,9606.ENSP00000216122,9606.ENSP00000216367,9606.ENSP00000216911,9606.ENSP00000221419,9606.ENSP00000226798,9606.ENSP00000228280,9606.ENSP00000229758,9606.ENSP00000231509,9606.ENSP00000232888,9606.ENSP00000233146,9606.ENSP00000234420,9606.ENSP00000242576,9606.ENSP00000243563,9606.ENSP00000245960,9606.ENSP00000247843,9606.ENSP00000251636,…
GO Process	GO:0000082	G1/S transition of mitotic cell cycle	4.8e-20	32	128	CDC6,MCM5,POLE2,FBXO5,NASP,CDK4,USP37,MCM4,MCM6,PPAT,MCM2,NPAT,CDT1,CDC25A,MCM7,KHDRBS1,E2F7,CUL1,CDKN3,E2F1,PRIM1,IQGAP3,ORC1,TFDP1,PCNA,CDKN2D,RBBP8,CDC45,MCM10,CCNE2,MCM3,PRIM2	9606.ENSP00000209728,9606.ENSP00000216122,9606.ENSP00000216367,9606.ENSP00000229758,9606.ENSP00000255120,9606.ENSP00000257904,9606.ENSP00000258399,9606.ENSP00000262105,9606.ENSP00000264156,9606.ENSP00000264220,9606.ENSP00000265056,9606.ENSP00000278612,9606.ENSP00000301019,9606.ENSP00000303706,9606.ENSP00000307288,9606.ENSP00000313829,9606.ENSP00000323246,9606.ENSP00000326804,9606.ENSP00000335357,…
GO Process	GO:0051726	Regulation of cell cycle	5.44e-20	86	1230	CDC6,AURKA,CAV2,FBXO5,MSH2,CDC25B,DLGAP5,CCNB1,CDK4,BRIP1,TIPIN,EED,WDR76,CENPE,NBN,CEP164,CABLES2,HAUS1,ZFP36L2,RIOK2,HNRNPU,CCNB2,BAX,RAD21,PLK1,CDT1,BIRC5,BUB1,CDC25A,FEN1,RMI2,CLSPN,ATAD5,CDC25C,E2F7,DBF4B,STK25,CUL1,CDKN3,LIN54,E2F1,PRKAA1,DNA2,NAE1,PCNT,E2F2,CENPF,DTL,INTS7,NEK2,KIF14,ASPM,DCLRE1B,PSRC1,JUN,ORC1,RBL1,CNTRL,TFDP1,PCNA,CIT,CDKN2D,PTTG1,SIPA1,PRC1,SLFN11,KIF20A,CCNF,RBBP8,PAXI…	9606.ENSP00000209728,9606.ENSP00000216911,9606.ENSP00000222693,9606.ENSP00000229758,9606.ENSP00000233146,9606.ENSP00000245960,9606.ENSP00000247191,9606.ENSP00000256442,9606.ENSP00000257904,9606.ENSP00000259008,9606.ENSP00000261881,9606.ENSP00000263360,9606.ENSP00000263795,9606.ENSP00000265148,9606.ENSP00000265433,9606.ENSP00000278935,9606.ENSP00000279101,9606.ENSP00000282058,9606.ENSP00000282388,…
GO Process	GO:0010564	Regulation of cell cycle process	1.28e-18	65	760	CDC6,AURKA,CAV2,FBXO5,CDC25B,DLGAP5,CCNB1,CDK4,TIPIN,EED,CENPE,NBN,CEP164,HAUS1,ZFP36L2,RIOK2,HNRNPU,BAX,RAD21,PLK1,CDT1,BIRC5,BUB1,CDC25A,FEN1,RMI2,CLSPN,ATAD5,CDC25C,E2F7,DBF4B,CUL1,E2F1,NAE1,PCNT,CENPF,DTL,NEK2,KIF14,PSRC1,ORC1,RBL1,CNTRL,TFDP1,PCNA,CIT,CDKN2D,PTTG1,PRC1,SLFN11,KIF20A,CCNF,RBBP8,PAXIP1,PSME4,PRPF40A,CHEK1,ODF2,CDC45,BRCA1,CKAP5,DDX11,BORA,MYO19,E2F8	9606.ENSP00000209728,9606.ENSP00000216911,9606.ENSP00000222693,9606.ENSP00000229758,9606.ENSP00000245960,9606.ENSP00000247191,9606.ENSP00000256442,9606.ENSP00000257904,9606.ENSP00000261881,9606.ENSP00000263360,9606.ENSP00000265148,9606.ENSP00000265433,9606.ENSP00000278935,9606.ENSP00000282058,9606.ENSP00000282388,9606.ENSP00000283109,9606.ENSP00000283179,9606.ENSP00000293288,9606.ENSP00000297338,…
GO Process	GO:0006807	Nitrogen compound metabolic process	2.06e-18	235	6852	MRI1,TARBP1,CAMKK1,CDC6,ATP5D,MCM5,POLE2,AURKA,PYCRL,HNRNPL,FRG1,KITLG,FBXO5,NR3C1,RRP9,MSH2,MSH6,UNG,SNRPA,CDC25B,YEATS4,DHX29,GINS2,FUS,CCNB1,IRAK2,DDB2,NAT10,CDK4,USP37,RSAD1,TEX2,BRIP1,TGS1,PPIG,LOC81691,RNF138,UTP20,TIPIN,MCM4,GINS1,EED,POLD3,MCM6,PPAT,RAD18,MRPL3,MCM2,NBN,HNRNPH3,CPSF6,NAF1,MMS22L,PM20D2,CEP164,FARSB,ZFP36L2,RIOK2,HNRNPU,TSEN2,MMP16,DCK,EXOG,EIF5B,BAX,HMGB2,ABCE1,TRA2A,RAD2…	9606.ENSP00000040663,9606.ENSP00000040877,9606.ENSP00000158166,9606.ENSP00000209728,9606.ENSP00000215375,9606.ENSP00000216122,9606.ENSP00000216367,9606.ENSP00000216911,9606.ENSP00000220966,9606.ENSP00000221419,9606.ENSP00000226798,9606.ENSP00000228280,9606.ENSP00000229758,9606.ENSP00000231509,9606.ENSP00000232888,9606.ENSP00000233146,9606.ENSP00000234420,9606.ENSP00000242576,9606.ENSP00000243563,…
GO Process	GO:0044237	Cellular metabolic process	2.76e-18	249	7513	MRI1,TARBP1,CAMKK1,CDC6,ATP5D,MCM5,POLE2,AURKA,PYCRL,HNRNPL,FRG1,KITLG,FBXO5,NR3C1,RRP9,MSH2,MSH6,UNG,SNRPA,CDC25B,YEATS4,DHX29,GINS2,FUS,NASP,CCNB1,IRAK2,DDB2,NAT10,CDK4,USP37,RSAD1,TEX2,BRIP1,TGS1,PPIG,LOC81691,RNF138,UTP20,TIPIN,MCM4,GINS1,EED,POLD3,MCM6,PPAT,RAD18,MRPL3,MCM2,NBN,HNRNPH3,CPSF6,NAF1,MMS22L,CEP164,FARSB,ZFP36L2,RIOK2,HNRNPU,TSEN2,DCK,EXOG,EIF5B,BAX,HMGB2,ABCE1,TRA2A,RAD21,NOL6,P…	9606.ENSP00000040663,9606.ENSP00000040877,9606.ENSP00000158166,9606.ENSP00000209728,9606.ENSP00000215375,9606.ENSP00000216122,9606.ENSP00000216367,9606.ENSP00000216911,9606.ENSP00000220966,9606.ENSP00000221419,9606.ENSP00000226798,9606.ENSP00000228280,9606.ENSP00000229758,9606.ENSP00000231509,9606.ENSP00000232888,9606.ENSP00000233146,9606.ENSP00000234420,9606.ENSP00000242576,9606.ENSP00000243563,…
GO Process	GO:0033260	Nuclear dna replication	1.39e-17	21	43	MCM5,POLE2,MCM4,GINS1,POLD3,MCM6,MCM2,CDT1,FEN1,MCM7,ATAD5,PRIM1,DNA2,PCNA,RFC3,RFC1,RFC4,CDC45,POLD1,MCM3,PRIM2	9606.ENSP00000216122,9606.ENSP00000216367,9606.ENSP00000262105,9606.ENSP00000262460,9606.ENSP00000263681,9606.ENSP00000264156,9606.ENSP00000265056,9606.ENSP00000301019,9606.ENSP00000305480,9606.ENSP00000307288,9606.ENSP00000313171,9606.ENSP00000350491,9606.ENSP00000351185,9606.ENSP00000368458,9606.ENSP00000369411,9606.ENSP00000371321,9606.ENSP00000376272,9606.ENSP00000405726,9606.ENSP00000406046,…
GO Process	GO:0006996	Organelle organization	3.46e-17	149	3450	ATP5D,TIMM13,MCM5,POLE2,AURKA,CAV2,FBXO5,NR3C1,MSH2,FASTKD2,CDC25B,DLGAP5,YEATS4,DHX29,GINS2,SMARCC1,NASP,CCNB1,DDB2,BRIP1,MCM4,EED,POLD3,MCM6,RAD18,MCM2,CENPE,NBN,NUF2,CEP164,HAUS1,HNRNPU,ATAD2,CCNB2,BAX,BBS5,HMGB2,RAD21,PLK1,CDT1,CHAF1A,BIRC5,BUB1,FEN1,ARL6IP1,ESCO2,MCM7,CBX2,C10orf2,RMI2,RNF26,CHAF1B,TLK2,RMI1,F2R,DSCC1,NCAPD2,STK25,PMAIP1,PIF1,MINA,H1FX,COL7A1,CDKN3,ZFYVE16,CENPQ,GTF2F2,TMEM2…	9606.ENSP00000215375,9606.ENSP00000215570,9606.ENSP00000216122,9606.ENSP00000216367,9606.ENSP00000216911,9606.ENSP00000222693,9606.ENSP00000229758,9606.ENSP00000231509,9606.ENSP00000233146,9606.ENSP00000236980,9606.ENSP00000245960,9606.ENSP00000247191,9606.ENSP00000247843,9606.ENSP00000251636,9606.ENSP00000253462,9606.ENSP00000254480,9606.ENSP00000255120,9606.ENSP00000256442,9606.ENSP00000256996,…
GO Process	GO:0071840	Cellular component organization or biogenesis	8.19e-17	203	5633	ATP5D,TIMM13,MCM5,POLE2,AURKA,CAV2,FRG1,FBXO5,NR3C1,RRP9,MSH2,FASTKD2,CDC25B,DLGAP5,YEATS4,DHX29,GINS2,FUS,SMARCC1,NASP,CCNB1,DDB2,NAT10,CDK4,URB2,BRIP1,TGS1,UTP20,MPP5,MCM4,EED,POLD3,MCM6,RAD18,MRPL3,MCM2,CENPE,NBN,CPSF6,CDH11,SH3GL1,NUF2,NAF1,CEP164,FARSB,HAUS1,RIOK2,HNRNPU,MMP16,ATAD2,EXOG,FZD1,CCNB2,BAX,BBS5,HMGB2,ABCE1,RAD21,NOL6,PLK1,CDT1,CHAF1A,BIRC5,BUB1,MAT2A,FEN1,ARL6IP1,ESCO2,MCM7,WDR3…	9606.ENSP00000215375,9606.ENSP00000215570,9606.ENSP00000216122,9606.ENSP00000216367,9606.ENSP00000216911,9606.ENSP00000222693,9606.ENSP00000226798,9606.ENSP00000229758,9606.ENSP00000231509,9606.ENSP00000232888,9606.ENSP00000233146,9606.ENSP00000236980,9606.ENSP00000245960,9606.ENSP00000247191,9606.ENSP00000247843,9606.ENSP00000251636,9606.ENSP00000253462,9606.ENSP00000254108,9606.ENSP00000254480,…
GO Process	GO:0051301	Cell division	9.6e-17	50	493	CDC6,AURKA,FBXO5,NR3C1,CDC25B,CCNB1,CDK4,USP37,BRIP1,TIPIN,CENPE,NUF2,CEP164,CABLES2,HAUS1,ZFP36L2,HNRNPU,CCNB2,RAD21,PLK1,CDT1,BIRC5,BUB1,CDC25A,CDC25C,NCAPD2,MCMBP,CENPF,NEK2,KIF14,ASPM,PSRC1,KIF2C,CNTRL,SEPT8,CNTROB,CIT,PTTG1,HELLS,PRC1,KIF20A,CCNF,RBBP8,PRPF40A,DSN1,GNL3,TOP2A,CCNE2,CKAP5,BORA	9606.ENSP00000209728,9606.ENSP00000216911,9606.ENSP00000229758,9606.ENSP00000231509,9606.ENSP00000245960,9606.ENSP00000256442,9606.ENSP00000257904,9606.ENSP00000258399,9606.ENSP00000259008,9606.ENSP00000261881,9606.ENSP00000265148,9606.ENSP00000271452,9606.ENSP00000278935,9606.ENSP00000279101,9606.ENSP00000282058,9606.ENSP00000282388,9606.ENSP00000283179,9606.ENSP00000288207,9606.ENSP00000297338,…
GO Process	GO:1901987	Regulation of cell cycle phase transition	9.6e-17	48	452	CDC6,AURKA,FBXO5,CDC25B,DLGAP5,CCNB1,CDK4,CENPE,NBN,CEP164,HAUS1,ZFP36L2,RIOK2,BAX,RAD21,PLK1,CDT1,BIRC5,BUB1,CDC25A,CLSPN,ATAD5,CDC25C,E2F7,DBF4B,CUL1,E2F1,NAE1,PCNT,CENPF,DTL,NEK2,KIF14,ORC1,RBL1,CNTRL,TFDP1,PCNA,CDKN2D,SLFN11,PAXIP1,PSME4,CHEK1,ODF2,CDC45,BRCA1,CKAP5,E2F8	9606.ENSP00000209728,9606.ENSP00000216911,9606.ENSP00000229758,9606.ENSP00000245960,9606.ENSP00000247191,9606.ENSP00000256442,9606.ENSP00000257904,9606.ENSP00000265148,9606.ENSP00000265433,9606.ENSP00000278935,9606.ENSP00000282058,9606.ENSP00000282388,9606.ENSP00000283109,9606.ENSP00000293288,9606.ENSP00000297338,9606.ENSP00000300093,9606.ENSP00000301019,9606.ENSP00000301633,9606.ENSP00000302530,…
GO Process	GO:0071704	Organic substance metabolic process	9.68e-17	250	7755	MRI1,TARBP1,CAMKK1,CDC6,ATP5D,MCM5,POLE2,AURKA,PYCRL,HNRNPL,FRG1,KITLG,FBXO5,NR3C1,RRP9,MSH2,MSH6,UNG,SNRPA,CDC25B,YEATS4,DHX29,GINS2,FUS,NASP,CCNB1,IRAK2,DDB2,NAT10,CDK4,USP37,RSAD1,TEX2,BRIP1,TGS1,PPIG,LOC81691,RNF138,UTP20,MPP5,TIPIN,MCM4,GINS1,EED,POLD3,MCM6,PPAT,RAD18,MRPL3,MCM2,NBN,HNRNPH3,CPSF6,NAF1,MMS22L,PM20D2,CEP164,FARSB,ZFP36L2,RIOK2,HNRNPU,TSEN2,MMP16,DCK,EXOG,EIF5B,BAX,HMGB2,ABCE1,…	9606.ENSP00000040663,9606.ENSP00000040877,9606.ENSP00000158166,9606.ENSP00000209728,9606.ENSP00000215375,9606.ENSP00000216122,9606.ENSP00000216367,9606.ENSP00000216911,9606.ENSP00000220966,9606.ENSP00000221419,9606.ENSP00000226798,9606.ENSP00000228280,9606.ENSP00000229758,9606.ENSP00000231509,9606.ENSP00000232888,9606.ENSP00000233146,9606.ENSP00000234420,9606.ENSP00000242576,9606.ENSP00000243563,…
GO Process	GO:1901990	Regulation of mitotic cell cycle phase transition	1.21e-16	46	416	CDC6,AURKA,FBXO5,CDC25B,DLGAP5,CCNB1,CDK4,CENPE,NBN,CEP164,HAUS1,ZFP36L2,RIOK2,BAX,RAD21,PLK1,CDT1,BIRC5,BUB1,CDC25A,CLSPN,ATAD5,CDC25C,E2F7,DBF4B,CUL1,E2F1,NAE1,PCNT,CENPF,DTL,NEK2,KIF14,ORC1,RBL1,CNTRL,TFDP1,PCNA,CDKN2D,SLFN11,PSME4,ODF2,CDC45,BRCA1,CKAP5,E2F8	9606.ENSP00000209728,9606.ENSP00000216911,9606.ENSP00000229758,9606.ENSP00000245960,9606.ENSP00000247191,9606.ENSP00000256442,9606.ENSP00000257904,9606.ENSP00000265148,9606.ENSP00000265433,9606.ENSP00000278935,9606.ENSP00000282058,9606.ENSP00000282388,9606.ENSP00000283109,9606.ENSP00000293288,9606.ENSP00000297338,9606.ENSP00000300093,9606.ENSP00000301019,9606.ENSP00000301633,9606.ENSP00000302530,…
GO Process	GO:0007346	Regulation of mitotic cell cycle	6.13e-16	57	676	CDC6,AURKA,CAV2,FBXO5,MSH2,CDC25B,DLGAP5,CCNB1,CDK4,TIPIN,CENPE,NBN,CEP164,HAUS1,ZFP36L2,RIOK2,HNRNPU,BAX,RAD21,PLK1,CDT1,BIRC5,BUB1,CDC25A,CLSPN,ATAD5,CDC25C,E2F7,DBF4B,STK25,CUL1,E2F1,NAE1,PCNT,CENPF,DTL,NEK2,KIF14,DCLRE1B,PSRC1,ORC1,RBL1,CNTRL,TFDP1,PCNA,CDKN2D,PTTG1,SLFN11,PSME4,CHEK1,ODF2,CDC45,TOP2A,BRCA1,CKAP5,BORA,E2F8	9606.ENSP00000209728,9606.ENSP00000216911,9606.ENSP00000222693,9606.ENSP00000229758,9606.ENSP00000233146,9606.ENSP00000245960,9606.ENSP00000247191,9606.ENSP00000256442,9606.ENSP00000257904,9606.ENSP00000261881,9606.ENSP00000265148,9606.ENSP00000265433,9606.ENSP00000278935,9606.ENSP00000282058,9606.ENSP00000282388,9606.ENSP00000283109,9606.ENSP00000283179,9606.ENSP00000293288,9606.ENSP00000297338,…
GO Process	GO:0006310	DNA recombination	6.59e-16	34	219	MCM5,MSH2,MSH6,UNG,GINS2,BRIP1,RNF138,MCM4,MCM6,MCM2,NBN,MMS22L,HMGB2,RAD21,FEN1,MCM7,ATAD5,RMI1,PIF1,NDNL2,HMGB1,XRCC2,FAN1,EXO1,PARP1,RAD54L,APEX2,RBBP8,PAXIP1,TONSL,CDC45,TOP2A,BRCA1,MCM3	9606.ENSP00000216122,9606.ENSP00000233146,9606.ENSP00000234420,9606.ENSP00000242576,9606.ENSP00000253462,9606.ENSP00000259008,9606.ENSP00000261593,9606.ENSP00000262105,9606.ENSP00000264156,9606.ENSP00000265056,9606.ENSP00000265433,9606.ENSP00000275053,9606.ENSP00000296503,9606.ENSP00000297338,9606.ENSP00000305480,9606.ENSP00000307288,9606.ENSP00000313171,9606.ENSP00000317039,9606.ENSP00000328174,…
GO Process	GO:0033554	Cellular response to stress	8.03e-16	95	1725	MCM5,POLE2,AURKA,HNRNPL,MSH2,MSH6,UNG,KLF2,GINS2,CCNB1,IRAK2,DDB2,BRIP1,RNF138,TIPIN,MCM4,POLD3,WDR76,MCM6,RAD18,MCM2,NBN,MMS22L,CEP164,BAX,HMGB2,RAD21,PLK1,CHAF1A,FEN1,ESCO2,MCM7,RMI2,CLSPN,ATAD5,CHAF1B,TLK2,RMI1,CDC25C,DCTPP1,E2F7,WDR33,STK25,PMAIP1,CUL1,PIF1,NDNL2,C17orf70,HNRNPA1,HMGB1,E2F1,PRKAA1,NET1,DNA2,MAP3K5,XRCC2,WDHD1,FAN1,EXO1,PARP1,DTL,INTS7,ASCC3,DCLRE1B,JUN,RAD54L,APEX2,TFDP1,PCNA…	9606.ENSP00000216122,9606.ENSP00000216367,9606.ENSP00000216911,9606.ENSP00000221419,9606.ENSP00000233146,9606.ENSP00000234420,9606.ENSP00000242576,9606.ENSP00000248071,9606.ENSP00000253462,9606.ENSP00000256442,9606.ENSP00000256458,9606.ENSP00000256996,9606.ENSP00000259008,9606.ENSP00000261593,9606.ENSP00000261881,9606.ENSP00000262105,9606.ENSP00000263681,9606.ENSP00000263795,9606.ENSP00000264156,…
GO Process	GO:0032392	DNA geometric change	2.12e-15	26	114	MCM5,GINS2,DDB2,BRIP1,MCM4,MCM6,RAD18,MCM2,NBN,HMGB2,MCM7,C10orf2,DSCC1,PIF1,GTF2F2,HMGB1,HNRNPA2B1,DNA2,PARP1,ASCC3,RAD54L,RFC3,RFC4,DDX11,GTF2H3,MCM3	9606.ENSP00000216122,9606.ENSP00000253462,9606.ENSP00000256996,9606.ENSP00000259008,9606.ENSP00000262105,9606.ENSP00000264156,9606.ENSP00000264926,9606.ENSP00000265056,9606.ENSP00000265433,9606.ENSP00000296503,9606.ENSP00000307288,9606.ENSP00000309595,9606.ENSP00000322180,9606.ENSP00000328174,9606.ENSP00000340823,9606.ENSP00000345347,9606.ENSP00000346694,9606.ENSP00000351185,9606.ENSP00000355759,…
GO Process	GO:0044238	Primary metabolic process	2.63e-15	237	7332	MRI1,TARBP1,CAMKK1,CDC6,ATP5D,MCM5,POLE2,AURKA,PYCRL,HNRNPL,FRG1,KITLG,FBXO5,NR3C1,RRP9,MSH2,MSH6,UNG,SNRPA,CDC25B,YEATS4,DHX29,GINS2,FUS,CCNB1,IRAK2,DDB2,NAT10,CDK4,USP37,TEX2,BRIP1,TGS1,PPIG,LOC81691,RNF138,UTP20,TIPIN,MCM4,GINS1,EED,POLD3,MCM6,PPAT,RAD18,MRPL3,MCM2,NBN,HNRNPH3,CPSF6,NAF1,MMS22L,PM20D2,CEP164,FARSB,ZFP36L2,RIOK2,HNRNPU,TSEN2,MMP16,DCK,EXOG,EIF5B,BAX,HMGB2,ABCE1,TRA2A,RAD21,NOL6…	9606.ENSP00000040663,9606.ENSP00000040877,9606.ENSP00000158166,9606.ENSP00000209728,9606.ENSP00000215375,9606.ENSP00000216122,9606.ENSP00000216367,9606.ENSP00000216911,9606.ENSP00000220966,9606.ENSP00000221419,9606.ENSP00000226798,9606.ENSP00000228280,9606.ENSP00000229758,9606.ENSP00000231509,9606.ENSP00000232888,9606.ENSP00000233146,9606.ENSP00000234420,9606.ENSP00000242576,9606.ENSP00000243563,…
GO Process	GO:0034645	Cellular macromolecule biosynthetic process	4.85e-15	89	1592	CDC6,MCM5,POLE2,NR3C1,DHX29,GINS2,NASP,CCNB1,CDK4,BRIP1,TIPIN,MCM4,GINS1,POLD3,MCM6,MRPL3,MCM2,NBN,MMS22L,FARSB,EIF5B,BAX,ABCE1,CDT1,CHAF1A,GTPBP2,FEN1,MCM7,C10orf2,RMI2,DSEL,CLSPN,ATAD5,CHAF1B,RMI1,DSCC1,WDR33,PIF1,CSTF2T,GTF2F2,E2F1,POLR3H,PRIM1,DNA2,MCMBP,EIF2B3,WDHD1,E2F2,TFB2M,EXO1,PARP1,CENPF,DTL,INTS7,EIF3A,RBMX,JUN,ORC1,MRPS16,TFDP1,PCNA,RFC3,RFC1,RFC4,CDKN2D,MRPL19,PTTG1,SLFN11,POLR3G,RB…	9606.ENSP00000209728,9606.ENSP00000216122,9606.ENSP00000216367,9606.ENSP00000231509,9606.ENSP00000251636,9606.ENSP00000253462,9606.ENSP00000255120,9606.ENSP00000256442,9606.ENSP00000257904,9606.ENSP00000259008,9606.ENSP00000261881,9606.ENSP00000262105,9606.ENSP00000262460,9606.ENSP00000263681,9606.ENSP00000264156,9606.ENSP00000264995,9606.ENSP00000265056,9606.ENSP00000265433,9606.ENSP00000275053,…
GO Process	GO:0071103	DNA conformation change	6.59e-15	39	328	MCM5,GINS2,NASP,CCNB1,DDB2,BRIP1,MCM4,MCM6,RAD18,MCM2,NBN,HMGB2,CHAF1A,MCM7,C10orf2,CHAF1B,DSCC1,NCAPD2,PIF1,H1FX,CENPQ,GTF2F2,H1F0,HMGB1,HNRNPA2B1,DNA2,PARP1,ASCC3,RAD54L,RFC3,RFC4,HELLS,PSME4,BEND3,TOP2A,DDX11,GTF2H3,NAP1L1,MCM3	9606.ENSP00000216122,9606.ENSP00000253462,9606.ENSP00000255120,9606.ENSP00000256442,9606.ENSP00000256996,9606.ENSP00000259008,9606.ENSP00000262105,9606.ENSP00000264156,9606.ENSP00000264926,9606.ENSP00000265056,9606.ENSP00000265433,9606.ENSP00000296503,9606.ENSP00000301280,9606.ENSP00000307288,9606.ENSP00000309595,9606.ENSP00000315700,9606.ENSP00000322180,9606.ENSP00000325017,9606.ENSP00000328174,…
GO Process	GO:0009059	Macromolecule biosynthetic process	9.78e-15	90	1643	CDC6,MCM5,POLE2,NR3C1,DHX29,GINS2,NASP,CCNB1,CDK4,BRIP1,TIPIN,MCM4,GINS1,POLD3,MCM6,MRPL3,MCM2,NBN,MMS22L,FARSB,EIF5B,BAX,ABCE1,CDT1,CHAF1A,GTPBP2,FEN1,MCM7,C10orf2,RMI2,DSEL,CLSPN,ATAD5,CHAF1B,RMI1,DSCC1,WDR33,PIF1,CSTF2T,GTF2F2,E2F1,POLR3H,PRIM1,DNA2,MCMBP,EIF2B3,WDHD1,E2F2,TFB2M,EXO1,PARP1,CENPF,DTL,INTS7,EIF3A,RBMX,JUN,ORC1,MRPS16,TFDP1,PCNA,RFC3,SDC1,RFC1,RFC4,CDKN2D,MRPL19,PTTG1,SLFN11,POLR…	9606.ENSP00000209728,9606.ENSP00000216122,9606.ENSP00000216367,9606.ENSP00000231509,9606.ENSP00000251636,9606.ENSP00000253462,9606.ENSP00000255120,9606.ENSP00000256442,9606.ENSP00000257904,9606.ENSP00000259008,9606.ENSP00000261881,9606.ENSP00000262105,9606.ENSP00000262460,9606.ENSP00000263681,9606.ENSP00000264156,9606.ENSP00000264995,9606.ENSP00000265056,9606.ENSP00000265433,9606.ENSP00000275053,…
GO Process	GO:0008152	Metabolic process	1.85e-14	255	8298	MRI1,TARBP1,CAMKK1,CDC6,ATP5D,MCM5,POLE2,AURKA,PYCRL,HNRNPL,FRG1,KITLG,FBXO5,NR3C1,RRP9,MSH2,MSH6,UNG,SNRPA,CDC25B,YEATS4,DHX29,GINS2,FUS,NASP,CCNB1,IRAK2,DDB2,NAT10,CDK4,USP37,RSAD1,TEX2,BRIP1,TGS1,PPIG,LOC81691,RNF138,UTP20,MPP5,TIPIN,MCM4,GINS1,EED,POLD3,MCM6,PPAT,RAD18,MRPL3,MCM2,NBN,HNRNPH3,CPSF6,NAF1,MMS22L,PM20D2,CEP164,FARSB,ZFP36L2,RIOK2,HNRNPU,TSEN2,MMP16,DCK,EXOG,EIF5B,BAX,HMGB2,ABCE1,…	9606.ENSP00000040663,9606.ENSP00000040877,9606.ENSP00000158166,9606.ENSP00000209728,9606.ENSP00000215375,9606.ENSP00000216122,9606.ENSP00000216367,9606.ENSP00000216911,9606.ENSP00000220966,9606.ENSP00000221419,9606.ENSP00000226798,9606.ENSP00000228280,9606.ENSP00000229758,9606.ENSP00000231509,9606.ENSP00000232888,9606.ENSP00000233146,9606.ENSP00000234420,9606.ENSP00000242576,9606.ENSP00000243563,…
GO Process	GO:0033044	Regulation of chromosome organization	9.76e-14	39	359	CDC6,FBXO5,DLGAP5,CCNB1,NAT10,EED,MCM2,CENPE,NBN,NAF1,RIOK2,HNRNPU,ATAD2,RAD21,PLK1,CDT1,BIRC5,BUB1,FEN1,RMI2,TLK2,PIF1,H1FX,HNRNPA1,H1F0,HNRNPA2B1,PARP1,CENPF,NEK2,PTTG1,PAXIP1,CHEK1,GNL3,CDC45,TOP2A,BRCA1,DDX11,HNRNPC,PHF19	9606.ENSP00000209728,9606.ENSP00000229758,9606.ENSP00000247191,9606.ENSP00000256442,9606.ENSP00000257829,9606.ENSP00000263360,9606.ENSP00000265056,9606.ENSP00000265148,9606.ENSP00000265433,9606.ENSP00000274054,9606.ENSP00000283109,9606.ENSP00000283179,9606.ENSP00000287394,9606.ENSP00000297338,9606.ENSP00000300093,9606.ENSP00000301019,9606.ENSP00000301633,9606.ENSP00000302530,9606.ENSP00000305480,…
GO Process	GO:0000075	Cell cycle checkpoint	1.03e-13	30	198	CDC6,AURKA,MSH2,CCNB1,BRIP1,TIPIN,NBN,BAX,PLK1,CDT1,BIRC5,BUB1,CLSPN,CDC25C,E2F7,E2F1,DNA2,NAE1,CENPF,DTL,INTS7,DCLRE1B,ORC1,TFDP1,PCNA,CHEK1,CDC45,TOP2A,BRCA1,E2F8	9606.ENSP00000209728,9606.ENSP00000216911,9606.ENSP00000233146,9606.ENSP00000256442,9606.ENSP00000259008,9606.ENSP00000261881,9606.ENSP00000265433,9606.ENSP00000293288,9606.ENSP00000300093,9606.ENSP00000301019,9606.ENSP00000301633,9606.ENSP00000302530,9606.ENSP00000312995,9606.ENSP00000321656,9606.ENSP00000323246,9606.ENSP00000345571,9606.ENSP00000351185,9606.ENSP00000351990,9606.ENSP00000355922,…
GO Process	GO:1902749	Regulation of cell cycle g2/m phase transition	1.1e-13	31	215	CDC6,AURKA,FBXO5,CDC25B,CCNB1,CDK4,NBN,CEP164,HAUS1,RAD21,PLK1,CDC25A,CLSPN,ATAD5,CDC25C,DBF4B,CUL1,NAE1,PCNT,CENPF,DTL,NEK2,KIF14,ORC1,CNTRL,PAXIP1,PSME4,CHEK1,ODF2,BRCA1,CKAP5	9606.ENSP00000209728,9606.ENSP00000216911,9606.ENSP00000229758,9606.ENSP00000245960,9606.ENSP00000256442,9606.ENSP00000257904,9606.ENSP00000265433,9606.ENSP00000278935,9606.ENSP00000282058,9606.ENSP00000297338,9606.ENSP00000300093,9606.ENSP00000303706,9606.ENSP00000312995,9606.ENSP00000313171,9606.ENSP00000321656,9606.ENSP00000323663,9606.ENSP00000326804,9606.ENSP00000351990,9606.ENSP00000352572,…
GO Process	GO:0016070	RNA metabolic process	2.62e-13	85	1584	TARBP1,HNRNPL,FRG1,NR3C1,RRP9,SNRPA,FUS,CCNB1,NAT10,CDK4,TGS1,PPIG,UTP20,HNRNPH3,CPSF6,NAF1,FARSB,ZFP36L2,RIOK2,HNRNPU,TSEN2,EXOG,BAX,TRA2A,NOL6,GTPBP2,FEN1,WDR3,C10orf2,KHDRBS1,SNRNP200,WDR33,CIRH1A,CSTF2T,PNRC2,ZNF326,GTF2F2,HNRNPA1,E2F1,HNRNPA2B1,CGI-74,POLR3H,PUS7,HNRNPH1,PTBP1,PRIM1,DNA2,E2F2,TFB2M,EXO1,PARP1,RRP15,INTS7,SMNDC1,RBMX,JUN,TFDP1,HNRNPK,EXOSC9,RPP40,URB1,HNRNPA3,PTTG1,SLFN11,POL…	9606.ENSP00000040877,9606.ENSP00000221419,9606.ENSP00000226798,9606.ENSP00000231509,9606.ENSP00000232888,9606.ENSP00000243563,9606.ENSP00000254108,9606.ENSP00000256442,9606.ENSP00000257829,9606.ENSP00000257904,9606.ENSP00000260129,9606.ENSP00000260970,9606.ENSP00000261637,9606.ENSP00000265866,9606.ENSP00000266679,9606.ENSP00000274054,9606.ENSP00000281828,9606.ENSP00000282388,9606.ENSP00000283109,…
GO Process	GO:0031570	DNA integrity checkpoint	6.47e-13	26	151	CDC6,AURKA,MSH2,CCNB1,BRIP1,TIPIN,NBN,BAX,PLK1,CDT1,CLSPN,CDC25C,E2F7,E2F1,DNA2,NAE1,DTL,INTS7,ORC1,TFDP1,PCNA,CHEK1,CDC45,TOP2A,BRCA1,E2F8	9606.ENSP00000209728,9606.ENSP00000216911,9606.ENSP00000233146,9606.ENSP00000256442,9606.ENSP00000259008,9606.ENSP00000261881,9606.ENSP00000265433,9606.ENSP00000293288,9606.ENSP00000300093,9606.ENSP00000301019,9606.ENSP00000312995,9606.ENSP00000321656,9606.ENSP00000323246,9606.ENSP00000345571,9606.ENSP00000351185,9606.ENSP00000351990,9606.ENSP00000355958,9606.ENSP00000355961,9606.ENSP00000360623,…
GO Process	GO:0045930	Negative regulation of mitotic cell cycle	9.11e-13	35	308	CDC6,AURKA,FBXO5,MSH2,CCNB1,CDK4,TIPIN,NBN,ZFP36L2,BAX,RAD21,PLK1,CDT1,BIRC5,BUB1,CLSPN,CDC25C,E2F7,CUL1,E2F1,NAE1,CENPF,DCLRE1B,ORC1,RBL1,TFDP1,PCNA,CDKN2D,PTTG1,SLFN11,PSME4,CHEK1,TOP2A,BRCA1,E2F8	9606.ENSP00000209728,9606.ENSP00000216911,9606.ENSP00000229758,9606.ENSP00000233146,9606.ENSP00000256442,9606.ENSP00000257904,9606.ENSP00000261881,9606.ENSP00000265433,9606.ENSP00000282388,9606.ENSP00000293288,9606.ENSP00000297338,9606.ENSP00000300093,9606.ENSP00000301019,9606.ENSP00000301633,9606.ENSP00000302530,9606.ENSP00000312995,9606.ENSP00000321656,9606.ENSP00000323246,9606.ENSP00000326804,…
GO Process	GO:0010948	Negative regulation of cell cycle process	9.4e-13	36	328	CDC6,AURKA,FBXO5,CCNB1,CDK4,EED,NBN,ZFP36L2,BAX,RAD21,PLK1,CDT1,BIRC5,BUB1,CLSPN,CDC25C,E2F7,CUL1,E2F1,NAE1,CENPF,DTL,NEK2,ORC1,RBL1,TFDP1,PCNA,CDKN2D,PTTG1,SLFN11,CCNF,RBBP8,PSME4,CHEK1,BRCA1,E2F8	9606.ENSP00000209728,9606.ENSP00000216911,9606.ENSP00000229758,9606.ENSP00000256442,9606.ENSP00000257904,9606.ENSP00000263360,9606.ENSP00000265433,9606.ENSP00000282388,9606.ENSP00000293288,9606.ENSP00000297338,9606.ENSP00000300093,9606.ENSP00000301019,9606.ENSP00000301633,9606.ENSP00000302530,9606.ENSP00000312995,9606.ENSP00000321656,9606.ENSP00000323246,9606.ENSP00000326804,9606.ENSP00000345571,…
GO Process	GO:0045786	Negative regulation of cell cycle	1.29e-12	47	571	CDC6,AURKA,FBXO5,MSH2,CCNB1,CDK4,BRIP1,TIPIN,EED,NBN,ZFP36L2,BAX,RAD21,PLK1,CDT1,BIRC5,BUB1,CLSPN,CDC25C,E2F7,CUL1,CDKN3,E2F1,PRKAA1,DNA2,NAE1,CENPF,DTL,INTS7,NEK2,DCLRE1B,ORC1,RBL1,TFDP1,PCNA,CDKN2D,PTTG1,SIPA1,SLFN11,CCNF,RBBP8,PSME4,CHEK1,CDC45,TOP2A,BRCA1,E2F8	9606.ENSP00000209728,9606.ENSP00000216911,9606.ENSP00000229758,9606.ENSP00000233146,9606.ENSP00000256442,9606.ENSP00000257904,9606.ENSP00000259008,9606.ENSP00000261881,9606.ENSP00000263360,9606.ENSP00000265433,9606.ENSP00000282388,9606.ENSP00000293288,9606.ENSP00000297338,9606.ENSP00000300093,9606.ENSP00000301019,9606.ENSP00000301633,9606.ENSP00000302530,9606.ENSP00000312995,9606.ENSP00000321656,…
GO Process	GO:0006396	RNA processing	1.83e-12	58	854	TARBP1,HNRNPL,FRG1,RRP9,SNRPA,FUS,NAT10,TGS1,PPIG,UTP20,HNRNPH3,CPSF6,NAF1,RIOK2,HNRNPU,TSEN2,TRA2A,NOL6,WDR3,KHDRBS1,SNRNP200,WDR33,CIRH1A,CSTF2T,ZNF326,GTF2F2,HNRNPA1,HNRNPA2B1,CGI-74,PUS7,HNRNPH1,PTBP1,TFB2M,RRP15,INTS7,SMNDC1,RBMX,HNRNPK,EXOSC9,RPP40,URB1,HNRNPA3,NOLC1,PRPF40A,HNRNPLL,CDK12,HNRNPF,SLBP,SRSF10,WDR74,NOL8,GTF2H3,RRP12,HNRNPC,SUGP2,SNRNP70,TAF15,HNRNPDL	9606.ENSP00000040877,9606.ENSP00000221419,9606.ENSP00000226798,9606.ENSP00000232888,9606.ENSP00000243563,9606.ENSP00000254108,9606.ENSP00000257829,9606.ENSP00000260129,9606.ENSP00000260970,9606.ENSP00000261637,9606.ENSP00000265866,9606.ENSP00000266679,9606.ENSP00000274054,9606.ENSP00000283109,9606.ENSP00000283179,9606.ENSP00000284995,9606.ENSP00000297071,9606.ENSP00000297990,9606.ENSP00000308179,…
GO Process	GO:0032508	DNA duplex unwinding	3.02e-12	22	106	MCM5,GINS2,DDB2,BRIP1,MCM4,MCM6,RAD18,MCM2,NBN,MCM7,C10orf2,DSCC1,PIF1,GTF2F2,DNA2,PARP1,ASCC3,RFC3,RFC4,DDX11,GTF2H3,MCM3	9606.ENSP00000216122,9606.ENSP00000253462,9606.ENSP00000256996,9606.ENSP00000259008,9606.ENSP00000262105,9606.ENSP00000264156,9606.ENSP00000264926,9606.ENSP00000265056,9606.ENSP00000265433,9606.ENSP00000307288,9606.ENSP00000309595,9606.ENSP00000322180,9606.ENSP00000328174,9606.ENSP00000340823,9606.ENSP00000351185,9606.ENSP00000355759,9606.ENSP00000358159,9606.ENSP00000369411,9606.ENSP00000376272,…
GO Process	GO:0010389	Regulation of g2/m transition of mitotic cell cycle	4.06e-12	28	198	CDC6,AURKA,FBXO5,CDC25B,CCNB1,CDK4,NBN,CEP164,HAUS1,RAD21,PLK1,CDC25A,CLSPN,CDC25C,DBF4B,CUL1,NAE1,PCNT,CENPF,DTL,NEK2,KIF14,ORC1,CNTRL,PSME4,ODF2,BRCA1,CKAP5	9606.ENSP00000209728,9606.ENSP00000216911,9606.ENSP00000229758,9606.ENSP00000245960,9606.ENSP00000256442,9606.ENSP00000257904,9606.ENSP00000265433,9606.ENSP00000278935,9606.ENSP00000282058,9606.ENSP00000297338,9606.ENSP00000300093,9606.ENSP00000303706,9606.ENSP00000312995,9606.ENSP00000321656,9606.ENSP00000323663,9606.ENSP00000326804,9606.ENSP00000351990,9606.ENSP00000352572,9606.ENSP00000355922,…
GO Process	GO:1901988	Negative regulation of cell cycle phase transition	5.2e-12	30	235	CDC6,AURKA,FBXO5,CCNB1,CDK4,NBN,ZFP36L2,BAX,RAD21,PLK1,BIRC5,BUB1,CLSPN,CDC25C,E2F7,CUL1,E2F1,NAE1,CENPF,DTL,ORC1,RBL1,TFDP1,PCNA,CDKN2D,SLFN11,PSME4,CHEK1,BRCA1,E2F8	9606.ENSP00000209728,9606.ENSP00000216911,9606.ENSP00000229758,9606.ENSP00000256442,9606.ENSP00000257904,9606.ENSP00000265433,9606.ENSP00000282388,9606.ENSP00000293288,9606.ENSP00000297338,9606.ENSP00000300093,9606.ENSP00000301633,9606.ENSP00000302530,9606.ENSP00000312995,9606.ENSP00000321656,9606.ENSP00000323246,9606.ENSP00000326804,9606.ENSP00000345571,9606.ENSP00000351990,9606.ENSP00000355922,…
GO Process	GO:0044249	Cellular biosynthetic process	8.37e-12	112	2611	MRI1,CDC6,ATP5D,MCM5,POLE2,PYCRL,NR3C1,UNG,DHX29,GINS2,NASP,CCNB1,CDK4,RSAD1,BRIP1,TIPIN,MCM4,GINS1,POLD3,MCM6,PPAT,MRPL3,MCM2,NBN,MMS22L,FARSB,DCK,EIF5B,BAX,ABCE1,CDT1,CHAF1A,MAT2A,GTPBP2,FEN1,MCM7,C10orf2,RMI2,DSEL,CLSPN,ATAD5,CHAF1B,RMI1,IMPDH2,DSCC1,DCTPP1,WDR33,PIF1,CSTF2T,CECR5,GTF2F2,PTGES2,E2F1,PRKAA1,POLR3H,PRIM1,DNA2,MCMBP,EIF2B3,WDHD1,E2F2,TFB2M,EXO1,PARP1,CENPF,DTL,INTS7,UCK2,AMD1,EIF…	9606.ENSP00000040663,9606.ENSP00000209728,9606.ENSP00000215375,9606.ENSP00000216122,9606.ENSP00000216367,9606.ENSP00000220966,9606.ENSP00000231509,9606.ENSP00000242576,9606.ENSP00000251636,9606.ENSP00000253462,9606.ENSP00000255120,9606.ENSP00000256442,9606.ENSP00000257904,9606.ENSP00000258955,9606.ENSP00000259008,9606.ENSP00000261881,9606.ENSP00000262105,9606.ENSP00000262460,9606.ENSP00000263681,…
GO Process	GO:0016043	Cellular component organization	8.84e-12	184	5447	ATP5D,TIMM13,MCM5,POLE2,AURKA,CAV2,FBXO5,NR3C1,MSH2,FASTKD2,CDC25B,DLGAP5,YEATS4,DHX29,GINS2,FUS,SMARCC1,NASP,CCNB1,DDB2,CDK4,BRIP1,TGS1,MPP5,MCM4,EED,POLD3,MCM6,RAD18,MRPL3,MCM2,CENPE,NBN,CPSF6,CDH11,SH3GL1,NUF2,NAF1,CEP164,FARSB,HAUS1,HNRNPU,MMP16,ATAD2,EXOG,FZD1,CCNB2,BAX,BBS5,HMGB2,ABCE1,RAD21,PLK1,CDT1,CHAF1A,BIRC5,BUB1,MAT2A,FEN1,ARL6IP1,ESCO2,MCM7,CBX2,C10orf2,RMI2,RNF26,CHAF1B,TLK2,RMI1,S…	9606.ENSP00000215375,9606.ENSP00000215570,9606.ENSP00000216122,9606.ENSP00000216367,9606.ENSP00000216911,9606.ENSP00000222693,9606.ENSP00000229758,9606.ENSP00000231509,9606.ENSP00000233146,9606.ENSP00000236980,9606.ENSP00000245960,9606.ENSP00000247191,9606.ENSP00000247843,9606.ENSP00000251636,9606.ENSP00000253462,9606.ENSP00000254108,9606.ENSP00000254480,9606.ENSP00000255120,9606.ENSP00000256442,…
GO Process	GO:0044260	Cellular macromolecule metabolic process	1.65e-11	172	4976	TARBP1,CAMKK1,CDC6,MCM5,POLE2,AURKA,KITLG,FBXO5,NR3C1,MSH2,MSH6,UNG,CDC25B,YEATS4,DHX29,GINS2,NASP,CCNB1,IRAK2,DDB2,CDK4,USP37,BRIP1,TGS1,PPIG,RNF138,TIPIN,MCM4,GINS1,EED,POLD3,MCM6,RAD18,MRPL3,MCM2,NBN,MMS22L,CEP164,FARSB,ZFP36L2,RIOK2,EXOG,EIF5B,BAX,HMGB2,ABCE1,RAD21,PLK1,CDT1,CHAF1A,BIRC5,BUB1,CDC25A,GTPBP2,FEN1,ESCO2,MCM7,C10orf2,RMI2,DSEL,RNF26,CLSPN,ATAD5,CHAF1B,TLK2,RMI1,CDC25C,DSCC1,DCTPP…	9606.ENSP00000040877,9606.ENSP00000158166,9606.ENSP00000209728,9606.ENSP00000216122,9606.ENSP00000216367,9606.ENSP00000216911,9606.ENSP00000228280,9606.ENSP00000229758,9606.ENSP00000231509,9606.ENSP00000233146,9606.ENSP00000234420,9606.ENSP00000242576,9606.ENSP00000245960,9606.ENSP00000247843,9606.ENSP00000251636,9606.ENSP00000253462,9606.ENSP00000255120,9606.ENSP00000256442,9606.ENSP00000256458,…
GO Process	GO:0007059	Chromosome segregation	1.97e-11	31	268	NR3C1,DLGAP5,CCNB1,BRIP1,CENPE,NUF2,RAD21,PLK1,CDT1,BIRC5,BUB1,ESCO2,TLK2,RMI1,DSCC1,NCAPD2,CENPQ,MCMBP,CHAMP1,CENPF,NEK2,KIF14,PSRC1,KIF2C,PTTG1,PRC1,DSN1,TOP2A,BRCA1,CCNE2,DDX11	9606.ENSP00000231509,9606.ENSP00000247191,9606.ENSP00000256442,9606.ENSP00000259008,9606.ENSP00000265148,9606.ENSP00000271452,9606.ENSP00000297338,9606.ENSP00000300093,9606.ENSP00000301019,9606.ENSP00000301633,9606.ENSP00000302530,9606.ENSP00000306999,9606.ENSP00000316512,9606.ENSP00000317039,9606.ENSP00000322180,9606.ENSP00000325017,9606.ENSP00000337289,9606.ENSP00000353098,9606.ENSP00000354730,…
GO Process	GO:1901576	Organic substance biosynthetic process	2.75e-11	114	2734	MRI1,CDC6,ATP5D,MCM5,POLE2,PYCRL,NR3C1,UNG,DHX29,GINS2,NASP,CCNB1,CDK4,RSAD1,BRIP1,TIPIN,MCM4,GINS1,POLD3,MCM6,PPAT,MRPL3,MCM2,NBN,MMS22L,FARSB,DCK,EIF5B,BAX,ABCE1,CDT1,CHAF1A,MAT2A,GTPBP2,FEN1,MCM7,GPD2,C10orf2,RMI2,DSEL,CLSPN,ATAD5,CHAF1B,RMI1,IMPDH2,DSCC1,DCTPP1,WDR33,PIF1,CSTF2T,CECR5,GTF2F2,PTGES2,E2F1,PRKAA1,POLR3H,PRIM1,DNA2,MCMBP,EIF2B3,WDHD1,E2F2,TFB2M,EXO1,PARP1,CENPF,DTL,INTS7,UCK2,AMD…	9606.ENSP00000040663,9606.ENSP00000209728,9606.ENSP00000215375,9606.ENSP00000216122,9606.ENSP00000216367,9606.ENSP00000220966,9606.ENSP00000231509,9606.ENSP00000242576,9606.ENSP00000251636,9606.ENSP00000253462,9606.ENSP00000255120,9606.ENSP00000256442,9606.ENSP00000257904,9606.ENSP00000258955,9606.ENSP00000259008,9606.ENSP00000261881,9606.ENSP00000262105,9606.ENSP00000262460,9606.ENSP00000263681,…
GO Process	GO:1901991	Negative regulation of mitotic cell cycle phase transition	3.42e-11	28	219	CDC6,AURKA,FBXO5,CCNB1,CDK4,NBN,ZFP36L2,BAX,RAD21,PLK1,BIRC5,BUB1,CLSPN,CDC25C,E2F7,CUL1,E2F1,NAE1,CENPF,ORC1,RBL1,TFDP1,PCNA,CDKN2D,SLFN11,PSME4,BRCA1,E2F8	9606.ENSP00000209728,9606.ENSP00000216911,9606.ENSP00000229758,9606.ENSP00000256442,9606.ENSP00000257904,9606.ENSP00000265433,9606.ENSP00000282388,9606.ENSP00000293288,9606.ENSP00000297338,9606.ENSP00000300093,9606.ENSP00000301633,9606.ENSP00000302530,9606.ENSP00000312995,9606.ENSP00000321656,9606.ENSP00000323246,9606.ENSP00000326804,9606.ENSP00000345571,9606.ENSP00000351990,9606.ENSP00000355922,…
GO Process	GO:0006270	DNA replication initiation	4.17e-11	14	32	CDC6,MCM5,POLE2,MCM4,MCM6,MCM2,MCM7,PRIM1,ORC1,CDC45,MCM10,CCNE2,MCM3,PRIM2	9606.ENSP00000209728,9606.ENSP00000216122,9606.ENSP00000216367,9606.ENSP00000262105,9606.ENSP00000264156,9606.ENSP00000265056,9606.ENSP00000307288,9606.ENSP00000350491,9606.ENSP00000360623,9606.ENSP00000405726,9606.ENSP00000418268,9606.ENSP00000429089,9606.ENSP00000480987,9606.ENSP00000484105
GO Process	GO:0006302	Double-strand break repair	4.32e-11	27	204	MCM5,MSH2,GINS2,BRIP1,RNF138,MCM4,MCM6,MCM2,NBN,MMS22L,RAD21,FEN1,ESCO2,MCM7,RMI1,DNA2,XRCC2,FAN1,PARP1,DCLRE1B,RAD54L,RBBP8,PAXIP1,TONSL,CDC45,BRCA1,MCM3	9606.ENSP00000216122,9606.ENSP00000233146,9606.ENSP00000253462,9606.ENSP00000259008,9606.ENSP00000261593,9606.ENSP00000262105,9606.ENSP00000264156,9606.ENSP00000265056,9606.ENSP00000265433,9606.ENSP00000275053,9606.ENSP00000297338,9606.ENSP00000305480,9606.ENSP00000306999,9606.ENSP00000307288,9606.ENSP00000317039,9606.ENSP00000351185,9606.ENSP00000352271,9606.ENSP00000354497,9606.ENSP00000355759,…
GO Process	GO:0098813	Nuclear chromosome segregation	7.16e-11	27	209	DLGAP5,CCNB1,BRIP1,CENPE,NUF2,RAD21,PLK1,CDT1,BUB1,ESCO2,RMI1,DSCC1,NCAPD2,CENPQ,MCMBP,CHAMP1,CENPF,NEK2,KIF14,PSRC1,KIF2C,PTTG1,PRC1,DSN1,TOP2A,CCNE2,DDX11	9606.ENSP00000247191,9606.ENSP00000256442,9606.ENSP00000259008,9606.ENSP00000265148,9606.ENSP00000271452,9606.ENSP00000297338,9606.ENSP00000300093,9606.ENSP00000301019,9606.ENSP00000302530,9606.ENSP00000306999,9606.ENSP00000317039,9606.ENSP00000322180,9606.ENSP00000325017,9606.ENSP00000337289,9606.ENSP00000353098,9606.ENSP00000354730,9606.ENSP00000355922,9606.ENSP00000355966,9606.ENSP00000356319,…
GO Process	GO:0000724	Double-strand break repair via homologous recombination	9.97e-11	20	102	MCM5,GINS2,RNF138,MCM4,MCM6,MCM2,NBN,MMS22L,FEN1,MCM7,RMI1,XRCC2,FAN1,PARP1,RAD54L,RBBP8,TONSL,CDC45,BRCA1,MCM3	9606.ENSP00000216122,9606.ENSP00000253462,9606.ENSP00000261593,9606.ENSP00000262105,9606.ENSP00000264156,9606.ENSP00000265056,9606.ENSP00000265433,9606.ENSP00000275053,9606.ENSP00000305480,9606.ENSP00000307288,9606.ENSP00000317039,9606.ENSP00000352271,9606.ENSP00000354497,9606.ENSP00000355759,9606.ENSP00000361043,9606.ENSP00000382628,9606.ENSP00000386239,9606.ENSP00000405726,9606.ENSP00000418960,…
GO Process	GO:0000280	Nuclear division	1.27e-10	31	291	AURKA,FBXO5,CDC25B,DLGAP5,CCNB1,BRIP1,CENPE,NUF2,CCNB2,RAD21,PLK1,CDT1,BIRC5,BUB1,RMI1,DSCC1,NCAPD2,CHAMP1,NEK2,KIF14,ASPM,PSRC1,RAD54L,KIF2C,PTTG1,PRC1,DSN1,FIGNL1,TOP2A,CCNE2,MYBL1	9606.ENSP00000216911,9606.ENSP00000229758,9606.ENSP00000245960,9606.ENSP00000247191,9606.ENSP00000256442,9606.ENSP00000259008,9606.ENSP00000265148,9606.ENSP00000271452,9606.ENSP00000288207,9606.ENSP00000297338,9606.ENSP00000300093,9606.ENSP00000301019,9606.ENSP00000301633,9606.ENSP00000302530,9606.ENSP00000317039,9606.ENSP00000322180,9606.ENSP00000325017,9606.ENSP00000354730,9606.ENSP00000355966,…
GO Process	GO:0051983	Regulation of chromosome segregation	1.33e-10	20	104	CDC6,FBXO5,DLGAP5,CCNB1,RAD18,CENPE,RIOK2,HNRNPU,RAD21,PLK1,CDT1,BIRC5,BUB1,FEN1,RMI2,CENPF,NEK2,KIF2C,PTTG1,DDX11	9606.ENSP00000209728,9606.ENSP00000229758,9606.ENSP00000247191,9606.ENSP00000256442,9606.ENSP00000264926,9606.ENSP00000265148,9606.ENSP00000283109,9606.ENSP00000283179,9606.ENSP00000297338,9606.ENSP00000300093,9606.ENSP00000301019,9606.ENSP00000301633,9606.ENSP00000302530,9606.ENSP00000305480,9606.ENSP00000310356,9606.ENSP00000355922,9606.ENSP00000355966,9606.ENSP00000361298,9606.ENSP00000377536,…
GO Process	GO:0019219	Regulation of nucleobase-containing compound metabolic process	2.21e-10	144	3982	TARBP1,CDC6,HNRNPL,ERF,FBXO5,NR3C1,MSH2,MSH6,FASTKD2,PRRX1,SNRPA,DLGAP5,YEATS4,KLF2,FUS,SMARCC1,CCNB1,IRAK2,NAT10,BRIP1,LRPPRC,EED,NBN,HNRNPH3,SLC2A4RG,CPSF6,NAF1,ZNF215,NPAT,ZFP36L2,RIOK2,HNRNPU,ATAD2,FZD1,CIART,BAX,HMGB2,ABCE1,TRA2A,RAD21,PLK1,CDT1,BIRC5,CDCA7,CBX2,RMI2,ATAD5,KHDRBS1,NCL,BASP1,F2R,DSCC1,E2F7,CIRH1A,PIF1,MINA,H1FX,SPIN4,MTDH,ZNF326,GTF2F2,HNRNPA1,LIN54,H1F0,PTGES2,HMGB1,E2F1,PRK…	9606.ENSP00000040877,9606.ENSP00000209728,9606.ENSP00000221419,9606.ENSP00000222329,9606.ENSP00000229758,9606.ENSP00000231509,9606.ENSP00000233146,9606.ENSP00000234420,9606.ENSP00000236980,9606.ENSP00000239461,9606.ENSP00000243563,9606.ENSP00000247191,9606.ENSP00000247843,9606.ENSP00000248071,9606.ENSP00000254108,9606.ENSP00000254480,9606.ENSP00000256442,9606.ENSP00000256458,9606.ENSP00000257829,…
GO Process	GO:0007093	Mitotic cell cycle checkpoint	3.29e-10	23	156	CDC6,AURKA,MSH2,CCNB1,TIPIN,NBN,BAX,PLK1,BIRC5,BUB1,CLSPN,CDC25C,E2F7,E2F1,NAE1,CENPF,DCLRE1B,ORC1,TFDP1,PCNA,TOP2A,BRCA1,E2F8	9606.ENSP00000209728,9606.ENSP00000216911,9606.ENSP00000233146,9606.ENSP00000256442,9606.ENSP00000261881,9606.ENSP00000265433,9606.ENSP00000293288,9606.ENSP00000300093,9606.ENSP00000301633,9606.ENSP00000302530,9606.ENSP00000312995,9606.ENSP00000321656,9606.ENSP00000323246,9606.ENSP00000345571,9606.ENSP00000351990,9606.ENSP00000355922,9606.ENSP00000358576,9606.ENSP00000360623,9606.ENSP00000364519,…
GO Process	GO:0022616	DNA strand elongation	3.85e-10	12	23	GINS2,MCM4,GINS1,POLD3,NBN,MCM7,DNA2,DCLRE1B,PCNA,RFC3,RFC4,MCM3	9606.ENSP00000253462,9606.ENSP00000262105,9606.ENSP00000262460,9606.ENSP00000263681,9606.ENSP00000265433,9606.ENSP00000307288,9606.ENSP00000351185,9606.ENSP00000358576,9606.ENSP00000368458,9606.ENSP00000369411,9606.ENSP00000376272,9606.ENSP00000480987
GO Process	GO:2000112	Regulation of cellular macromolecule biosynthetic process	6.11e-10	140	3878	TARBP1,CDC6,HNRNPL,ERF,FBXO5,NR3C1,FASTKD2,PRRX1,DLGAP5,YEATS4,KLF2,DHX29,FUS,SMARCC1,IRAK2,NAT10,CDK4,USP37,BRIP1,LRPPRC,TIPIN,EED,NBN,SLC2A4RG,NAF1,ZNF215,NPAT,ZFP36L2,HNRNPU,ATAD2,FZD1,EIF5B,CIART,HMGB2,RAD21,PLK1,CDT1,BIRC5,GTPBP2,CDCA7,ESCO2,CBX2,ATAD5,KHDRBS1,NCL,BASP1,F2R,DSCC1,E2F7,DBF4B,CIRH1A,PIF1,H1FX,SPIN4,MTDH,ZNF326,GTF2F2,HNRNPA1,LIN54,H1F0,PTGES2,HMGB1,E2F1,SVIP,PRKAA1,HNRNPA2B1,P…	9606.ENSP00000040877,9606.ENSP00000209728,9606.ENSP00000221419,9606.ENSP00000222329,9606.ENSP00000229758,9606.ENSP00000231509,9606.ENSP00000236980,9606.ENSP00000239461,9606.ENSP00000247191,9606.ENSP00000247843,9606.ENSP00000248071,9606.ENSP00000251636,9606.ENSP00000254108,9606.ENSP00000254480,9606.ENSP00000256458,9606.ENSP00000257829,9606.ENSP00000257904,9606.ENSP00000258399,9606.ENSP00000259008,…
GO Process	GO:0000819	Sister chromatid segregation	9.27e-10	21	133	DLGAP5,CCNB1,CENPE,NUF2,RAD21,PLK1,CDT1,BUB1,ESCO2,DSCC1,NCAPD2,MCMBP,CHAMP1,NEK2,KIF14,PSRC1,KIF2C,PRC1,DSN1,TOP2A,DDX11	9606.ENSP00000247191,9606.ENSP00000256442,9606.ENSP00000265148,9606.ENSP00000271452,9606.ENSP00000297338,9606.ENSP00000300093,9606.ENSP00000301019,9606.ENSP00000302530,9606.ENSP00000306999,9606.ENSP00000322180,9606.ENSP00000325017,9606.ENSP00000353098,9606.ENSP00000354730,9606.ENSP00000355966,9606.ENSP00000356319,9606.ENSP00000358925,9606.ENSP00000361298,9606.ENSP00000377793,9606.ENSP00000389810,…
GO Process	GO:0090305	Nucleic acid phosphodiester bond hydrolysis	1.35e-09	30	302	DDB2,LOC81691,UTP20,POLD3,CPSF6,TSEN2,EXOG,HMGB2,FEN1,ATAD5,CSTF2T,PNRC2,H1F0,HMGB1,DNA2,FAN1,EXO1,PARP1,DCLRE1B,APEX2,PCNA,EXOSC9,RPP40,RFC3,RFC1,RFC4,SLFN11,RBBP8,POLD1,GTF2H3	9606.ENSP00000256996,9606.ENSP00000261377,9606.ENSP00000261637,9606.ENSP00000263681,9606.ENSP00000266679,9606.ENSP00000284995,9606.ENSP00000287675,9606.ENSP00000296503,9606.ENSP00000305480,9606.ENSP00000313171,9606.ENSP00000332444,9606.ENSP00000334840,9606.ENSP00000344504,9606.ENSP00000345347,9606.ENSP00000351185,9606.ENSP00000354497,9606.ENSP00000355506,9606.ENSP00000355759,9606.ENSP00000358576,…
GO Process	GO:0010556	Regulation of macromolecule biosynthetic process	1.72e-09	141	3976	TARBP1,CDC6,HNRNPL,ERF,FBXO5,NR3C1,FASTKD2,PRRX1,DLGAP5,YEATS4,KLF2,DHX29,FUS,SMARCC1,IRAK2,NAT10,CDK4,USP37,BRIP1,LRPPRC,TIPIN,EED,NBN,SLC2A4RG,NAF1,ZNF215,NPAT,ZFP36L2,HNRNPU,ATAD2,FZD1,EIF5B,CIART,HMGB2,RAD21,PLK1,CDT1,BIRC5,GTPBP2,CDCA7,ESCO2,CBX2,ATAD5,KHDRBS1,NCL,BASP1,F2R,DSCC1,E2F7,DBF4B,CIRH1A,PIF1,MINA,H1FX,SPIN4,MTDH,ZNF326,GTF2F2,HNRNPA1,LIN54,H1F0,PTGES2,HMGB1,E2F1,SVIP,PRKAA1,HNRNPA…	9606.ENSP00000040877,9606.ENSP00000209728,9606.ENSP00000221419,9606.ENSP00000222329,9606.ENSP00000229758,9606.ENSP00000231509,9606.ENSP00000236980,9606.ENSP00000239461,9606.ENSP00000247191,9606.ENSP00000247843,9606.ENSP00000248071,9606.ENSP00000251636,9606.ENSP00000254108,9606.ENSP00000254480,9606.ENSP00000256458,9606.ENSP00000257829,9606.ENSP00000257904,9606.ENSP00000258399,9606.ENSP00000259008,…
GO Process	GO:0051171	Regulation of nitrogen compound metabolic process	2.17e-09	185	5836	TARBP1,CAMKK1,CDC6,AURKA,HNRNPL,ERF,CAV2,KITLG,FBXO5,NR3C1,MSH2,MSH6,FASTKD2,PRRX1,SNRPA,CDC25B,DLGAP5,YEATS4,KLF2,DHX29,FUS,SMARCC1,CCNB1,IRAK2,NAT10,CDK4,BRIP1,LRPPRC,EED,CENPE,NBN,HNRNPH3,SLC2A4RG,CPSF6,NAF1,PM20D2,ZNF215,NPAT,ZFP36L2,RIOK2,HNRNPU,ATAD2,FZD1,CCNB2,EIF5B,CIART,BAX,HMGB2,ABCE1,TRA2A,RAD21,PLK1,CDT1,BIRC5,CDC25A,GTPBP2,ARL6IP1,CDCA7,CBX2,RMI2,CLSPN,ATAD5,KHDRBS1,TLK2,NCL,BASP1,F2…	9606.ENSP00000040877,9606.ENSP00000158166,9606.ENSP00000209728,9606.ENSP00000216911,9606.ENSP00000221419,9606.ENSP00000222329,9606.ENSP00000222693,9606.ENSP00000228280,9606.ENSP00000229758,9606.ENSP00000231509,9606.ENSP00000233146,9606.ENSP00000234420,9606.ENSP00000236980,9606.ENSP00000239461,9606.ENSP00000243563,9606.ENSP00000245960,9606.ENSP00000247191,9606.ENSP00000247843,9606.ENSP00000248071,…
GO Process	GO:0033045	Regulation of sister chromatid segregation	2.59e-09	17	83	CDC6,FBXO5,DLGAP5,CCNB1,CENPE,RIOK2,HNRNPU,RAD21,PLK1,CDT1,BIRC5,BUB1,FEN1,RMI2,CENPF,PTTG1,DDX11	9606.ENSP00000209728,9606.ENSP00000229758,9606.ENSP00000247191,9606.ENSP00000256442,9606.ENSP00000265148,9606.ENSP00000283109,9606.ENSP00000283179,9606.ENSP00000297338,9606.ENSP00000300093,9606.ENSP00000301019,9606.ENSP00000301633,9606.ENSP00000302530,9606.ENSP00000305480,9606.ENSP00000310356,9606.ENSP00000355922,9606.ENSP00000377536,9606.ENSP00000440402
GO Process	GO:0031323	Regulation of cellular metabolic process	4.59e-09	193	6239	TARBP1,CAMKK1,CDC6,AURKA,HNRNPL,ERF,CAV2,KITLG,FBXO5,NR3C1,MSH2,MSH6,FASTKD2,PRRX1,SNRPA,CDC25B,DLGAP5,YEATS4,KLF2,DHX29,FUS,SMARCC1,CCNB1,IRAK2,NAT10,CDK4,USP37,BRIP1,LRPPRC,TIPIN,EED,CENPE,NBN,HNRNPH3,SLC2A4RG,CPSF6,TRIM65,NAF1,PM20D2,ZNF215,NPAT,ZFP36L2,RIOK2,HNRNPU,ATAD2,FZD1,CCNB2,EIF5B,CIART,BAX,HMGB2,ABCE1,TRA2A,RAD21,PLK1,CDT1,BIRC5,CDC25A,GTPBP2,ARL6IP1,CDCA7,ESCO2,MCM7,CBX2,RMI2,CLSPN,A…	9606.ENSP00000040877,9606.ENSP00000158166,9606.ENSP00000209728,9606.ENSP00000216911,9606.ENSP00000221419,9606.ENSP00000222329,9606.ENSP00000222693,9606.ENSP00000228280,9606.ENSP00000229758,9606.ENSP00000231509,9606.ENSP00000233146,9606.ENSP00000234420,9606.ENSP00000236980,9606.ENSP00000239461,9606.ENSP00000243563,9606.ENSP00000245960,9606.ENSP00000247191,9606.ENSP00000247843,9606.ENSP00000248071,…
GO Process	GO:0044085	Cellular component biogenesis	6.46e-09	103	2583	ATP5D,MCM5,AURKA,CAV2,FRG1,FBXO5,RRP9,FASTKD2,DHX29,FUS,NASP,CCNB1,DDB2,NAT10,URB2,BRIP1,TGS1,UTP20,MPP5,MCM4,MCM6,MCM2,CENPE,NBN,CPSF6,CDH11,NAF1,CEP164,FARSB,HAUS1,RIOK2,FZD1,BBS5,HMGB2,ABCE1,NOL6,PLK1,CDT1,CHAF1A,BIRC5,MAT2A,ARL6IP1,MCM7,WDR3,C10orf2,CHAF1B,SNRNP200,STK25,CUL1,CIRH1A,MINA,H1FX,COL7A1,HOMER1,CDKN3,CENPQ,MTDH,H1F0,CGI-74,DNA2,PCNT,TFB2M,EXO1,PARP1,RRP15,CENPF,NEK2,ASPM,EIF3A,NDU…	9606.ENSP00000215375,9606.ENSP00000216122,9606.ENSP00000216911,9606.ENSP00000222693,9606.ENSP00000226798,9606.ENSP00000229758,9606.ENSP00000232888,9606.ENSP00000236980,9606.ENSP00000251636,9606.ENSP00000254108,9606.ENSP00000255120,9606.ENSP00000256442,9606.ENSP00000256996,9606.ENSP00000257829,9606.ENSP00000258243,9606.ENSP00000259008,9606.ENSP00000260129,9606.ENSP00000261637,9606.ENSP00000261681,…
GO Process	GO:2001251	Negative regulation of chromosome organization	9.56e-09	20	137	FBXO5,NAT10,MCM2,NBN,HNRNPU,ATAD2,RAD21,PLK1,BIRC5,BUB1,PIF1,H1FX,HNRNPA1,H1F0,PARP1,CENPF,PTTG1,TOP2A,BRCA1,HNRNPC	9606.ENSP00000229758,9606.ENSP00000257829,9606.ENSP00000265056,9606.ENSP00000265433,9606.ENSP00000283179,9606.ENSP00000287394,9606.ENSP00000297338,9606.ENSP00000300093,9606.ENSP00000301633,9606.ENSP00000302530,9606.ENSP00000328174,9606.ENSP00000329662,9606.ENSP00000341826,9606.ENSP00000344504,9606.ENSP00000355759,9606.ENSP00000355922,9606.ENSP00000377536,9606.ENSP00000411532,9606.ENSP00000418960,…
GO Process	GO:0080090	Regulation of primary metabolic process	1.07e-08	187	6032	TARBP1,CAMKK1,CDC6,AURKA,HNRNPL,ERF,CAV2,KITLG,FBXO5,NR3C1,MSH2,MSH6,FASTKD2,PRRX1,SNRPA,CDC25B,DLGAP5,YEATS4,KLF2,DHX29,FUS,SMARCC1,CCNB1,IRAK2,NAT10,CDK4,BRIP1,TGS1,LRPPRC,EED,CENPE,NBN,HNRNPH3,SLC2A4RG,CPSF6,NAF1,PM20D2,ZNF215,NPAT,ZFP36L2,RIOK2,HNRNPU,ATAD2,FZD1,CCNB2,EIF5B,CIART,BAX,HMGB2,ABCE1,TRA2A,RAD21,PLK1,CDT1,BIRC5,CDC25A,GTPBP2,ARL6IP1,CDCA7,CBX2,RMI2,CLSPN,ATAD5,KHDRBS1,TLK2,NCL,BAS…	9606.ENSP00000040877,9606.ENSP00000158166,9606.ENSP00000209728,9606.ENSP00000216911,9606.ENSP00000221419,9606.ENSP00000222329,9606.ENSP00000222693,9606.ENSP00000228280,9606.ENSP00000229758,9606.ENSP00000231509,9606.ENSP00000233146,9606.ENSP00000234420,9606.ENSP00000236980,9606.ENSP00000239461,9606.ENSP00000243563,9606.ENSP00000245960,9606.ENSP00000247191,9606.ENSP00000247843,9606.ENSP00000248071,…
GO Process	GO:0031326	Regulation of cellular biosynthetic process	1.1e-08	142	4125	TARBP1,CDC6,HNRNPL,ERF,FBXO5,NR3C1,FASTKD2,PRRX1,DLGAP5,YEATS4,KLF2,DHX29,FUS,SMARCC1,IRAK2,NAT10,CDK4,USP37,BRIP1,LRPPRC,TIPIN,EED,NBN,SLC2A4RG,NAF1,ZNF215,NPAT,ZFP36L2,HNRNPU,ATAD2,FZD1,EIF5B,CIART,HMGB2,RAD21,PLK1,CDT1,BIRC5,GTPBP2,CDCA7,ESCO2,CBX2,ATAD5,KHDRBS1,NCL,BASP1,F2R,DSCC1,E2F7,DBF4B,CIRH1A,PIF1,MINA,H1FX,SPIN4,MTDH,ZNF326,GTF2F2,HNRNPA1,LIN54,H1F0,PTGES2,HMGB1,E2F1,SVIP,PRKAA1,HNRNPA…	9606.ENSP00000040877,9606.ENSP00000209728,9606.ENSP00000221419,9606.ENSP00000222329,9606.ENSP00000229758,9606.ENSP00000231509,9606.ENSP00000236980,9606.ENSP00000239461,9606.ENSP00000247191,9606.ENSP00000247843,9606.ENSP00000248071,9606.ENSP00000251636,9606.ENSP00000254108,9606.ENSP00000254480,9606.ENSP00000256458,9606.ENSP00000257829,9606.ENSP00000257904,9606.ENSP00000258399,9606.ENSP00000259008,…
GO Process	GO:0032201	Telomere maintenance via semi-conservative replication	1.15e-08	11	25	POLE2,POLD3,FEN1,PRIM1,DNA2,PCNA,RFC3,RFC1,RFC4,POLD1,PRIM2	9606.ENSP00000216367,9606.ENSP00000263681,9606.ENSP00000305480,9606.ENSP00000350491,9606.ENSP00000351185,9606.ENSP00000368458,9606.ENSP00000369411,9606.ENSP00000371321,9606.ENSP00000376272,9606.ENSP00000406046,9606.ENSP00000484105
GO Process	GO:0006271	DNA strand elongation involved in DNA replication	1.44e-08	10	18	GINS2,MCM4,GINS1,POLD3,MCM7,DNA2,PCNA,RFC3,RFC4,MCM3	9606.ENSP00000253462,9606.ENSP00000262105,9606.ENSP00000262460,9606.ENSP00000263681,9606.ENSP00000307288,9606.ENSP00000351185,9606.ENSP00000368458,9606.ENSP00000369411,9606.ENSP00000376272,9606.ENSP00000480987
GO Process	GO:0051052	Regulation of dna metabolic process	1.47e-08	31	360	MSH2,MSH6,FUS,NAT10,NBN,NAF1,HNRNPU,BAX,CDT1,RMI2,ATAD5,DSCC1,PIF1,H1FX,HNRNPA1,H1F0,HMGB1,HNRNPA2B1,PARP1,NEK2,TFDP1,PCNA,RFC3,RFC4,PAXIP1,CHEK1,GNL3,FIGNL1,BRCA1,DDX11,HNRNPC	9606.ENSP00000233146,9606.ENSP00000234420,9606.ENSP00000254108,9606.ENSP00000257829,9606.ENSP00000265433,9606.ENSP00000274054,9606.ENSP00000283179,9606.ENSP00000293288,9606.ENSP00000301019,9606.ENSP00000310356,9606.ENSP00000313171,9606.ENSP00000322180,9606.ENSP00000328174,9606.ENSP00000329662,9606.ENSP00000341826,9606.ENSP00000344504,9606.ENSP00000345347,9606.ENSP00000346694,9606.ENSP00000355759,…
GO Process	GO:0090068	Positive regulation of cell cycle process	1.47e-08	28	294	CDC6,AURKA,FBXO5,CDC25B,DLGAP5,CCNB1,CDK4,HNRNPU,BAX,RAD21,CDT1,BIRC5,CDC25A,FEN1,ATAD5,CDC25C,E2F7,DBF4B,E2F1,DTL,KIF14,TFDP1,PCNA,CIT,CDC45,BRCA1,DDX11,E2F8	9606.ENSP00000209728,9606.ENSP00000216911,9606.ENSP00000229758,9606.ENSP00000245960,9606.ENSP00000247191,9606.ENSP00000256442,9606.ENSP00000257904,9606.ENSP00000283179,9606.ENSP00000293288,9606.ENSP00000297338,9606.ENSP00000301019,9606.ENSP00000301633,9606.ENSP00000303706,9606.ENSP00000305480,9606.ENSP00000313171,9606.ENSP00000321656,9606.ENSP00000323246,9606.ENSP00000323663,9606.ENSP00000345571,…
GO Process	GO:0006275	Regulation of dna replication	1.76e-08	18	111	CDC6,FBXO5,USP37,TIPIN,NBN,CDT1,ESCO2,ATAD5,DSCC1,E2F7,DBF4B,DNA2,JUN,PCNA,RFC3,RFC4,SLFN11,E2F8	9606.ENSP00000209728,9606.ENSP00000229758,9606.ENSP00000258399,9606.ENSP00000261881,9606.ENSP00000265433,9606.ENSP00000301019,9606.ENSP00000306999,9606.ENSP00000313171,9606.ENSP00000322180,9606.ENSP00000323246,9606.ENSP00000323663,9606.ENSP00000351185,9606.ENSP00000360266,9606.ENSP00000368458,9606.ENSP00000369411,9606.ENSP00000376272,9606.ENSP00000378067,9606.ENSP00000481103
GO Process	GO:0010467	Gene expression	1.78e-08	87	2056	TARBP1,HNRNPL,FRG1,NR3C1,RRP9,SNRPA,DHX29,FUS,CCNB1,NAT10,CDK4,TGS1,PPIG,UTP20,MPP5,MRPL3,HNRNPH3,CPSF6,NAF1,FARSB,RIOK2,HNRNPU,TSEN2,MMP16,EIF5B,BAX,ABCE1,TRA2A,NOL6,GTPBP2,WDR3,C10orf2,KHDRBS1,SNRNP200,WDR33,CIRH1A,CSTF2T,ZNF326,GTF2F2,HNRNPA1,HMGB1,E2F1,HNRNPA2B1,CGI-74,POLR3H,PUS7,HNRNPH1,PTBP1,EIF2B3,E2F2,TFB2M,PARP1,RRP15,INTS7,EIF3A,SMNDC1,RBMX,JUN,MRPS16,TFDP1,HNRNPK,EXOSC9,RPP40,URB1,HNR…	9606.ENSP00000040877,9606.ENSP00000221419,9606.ENSP00000226798,9606.ENSP00000231509,9606.ENSP00000232888,9606.ENSP00000243563,9606.ENSP00000251636,9606.ENSP00000254108,9606.ENSP00000256442,9606.ENSP00000257829,9606.ENSP00000257904,9606.ENSP00000260129,9606.ENSP00000260970,9606.ENSP00000261637,9606.ENSP00000261681,9606.ENSP00000264995,9606.ENSP00000265866,9606.ENSP00000266679,9606.ENSP00000274054,…
GO Process	GO:0051321	Meiotic cell cycle	2.58e-08	24	220	AURKA,FBXO5,MSH6,CDC25B,BRIP1,NBN,NUF2,RAD21,PLK1,BUB1,RMI1,NCAPD2,XRCC2,EXO1,NEK2,ASPM,RAD54L,PTTG1,RBBP8,FIGNL1,TOP2A,CCNE2,MYBL1,TUBGCP5	9606.ENSP00000216911,9606.ENSP00000229758,9606.ENSP00000234420,9606.ENSP00000245960,9606.ENSP00000259008,9606.ENSP00000265433,9606.ENSP00000271452,9606.ENSP00000297338,9606.ENSP00000300093,9606.ENSP00000302530,9606.ENSP00000317039,9606.ENSP00000325017,9606.ENSP00000352271,9606.ENSP00000355506,9606.ENSP00000355966,9606.ENSP00000356379,9606.ENSP00000361043,9606.ENSP00000377536,9606.ENSP00000382628,…
GO Process	GO:0006397	mRNA processing	3.03e-08	35	468	HNRNPL,FRG1,SNRPA,FUS,TGS1,HNRNPH3,CPSF6,HNRNPU,TSEN2,TRA2A,KHDRBS1,SNRNP200,WDR33,CSTF2T,ZNF326,GTF2F2,HNRNPA1,HNRNPA2B1,CGI-74,HNRNPH1,PTBP1,SMNDC1,RBMX,HNRNPK,HNRNPA3,PRPF40A,HNRNPLL,CDK12,HNRNPF,SLBP,SRSF10,GTF2H3,HNRNPC,SUGP2,SNRNP70	9606.ENSP00000221419,9606.ENSP00000226798,9606.ENSP00000243563,9606.ENSP00000254108,9606.ENSP00000260129,9606.ENSP00000265866,9606.ENSP00000266679,9606.ENSP00000283179,9606.ENSP00000284995,9606.ENSP00000297071,9606.ENSP00000313829,9606.ENSP00000317123,9606.ENSP00000325377,9606.ENSP00000332444,9606.ENSP00000340796,9606.ENSP00000340823,9606.ENSP00000341826,9606.ENSP00000346694,9606.ENSP00000347005,…
GO Process	GO:0008380	RNA splicing	3.06e-08	32	396	HNRNPL,FRG1,SNRPA,FUS,TGS1,PPIG,HNRNPH3,HNRNPU,TSEN2,TRA2A,SNRNP200,WDR33,CSTF2T,ZNF326,GTF2F2,HNRNPA1,HNRNPA2B1,CGI-74,HNRNPH1,PTBP1,SMNDC1,RBMX,HNRNPK,HNRNPA3,PRPF40A,CDK12,HNRNPF,SRSF10,HNRNPC,SUGP2,SNRNP70,TAF15	9606.ENSP00000221419,9606.ENSP00000226798,9606.ENSP00000243563,9606.ENSP00000254108,9606.ENSP00000260129,9606.ENSP00000260970,9606.ENSP00000265866,9606.ENSP00000283179,9606.ENSP00000284995,9606.ENSP00000297071,9606.ENSP00000317123,9606.ENSP00000325377,9606.ENSP00000332444,9606.ENSP00000340796,9606.ENSP00000340823,9606.ENSP00000341826,9606.ENSP00000346694,9606.ENSP00000347005,9606.ENSP00000349168,…
GO Process	GO:0022613	Ribonucleoprotein complex biogenesis	3.64e-08	33	423	FRG1,RRP9,FASTKD2,DHX29,NAT10,URB2,TGS1,UTP20,CPSF6,NAF1,RIOK2,ABCE1,NOL6,WDR3,SNRNP200,CIRH1A,MINA,CGI-74,TFB2M,RRP15,EIF3A,RBMX,SURF6,GNL2,PAK1IP1,EXOSC9,RPP40,URB1,NOLC1,SRSF10,WDR74,NOL8,RRP12	9606.ENSP00000226798,9606.ENSP00000232888,9606.ENSP00000236980,9606.ENSP00000251636,9606.ENSP00000257829,9606.ENSP00000258243,9606.ENSP00000260129,9606.ENSP00000261637,9606.ENSP00000266679,9606.ENSP00000274054,9606.ENSP00000283109,9606.ENSP00000296577,9606.ENSP00000297990,9606.ENSP00000308179,9606.ENSP00000317123,9606.ENSP00000327179,9606.ENSP00000328251,9606.ENSP00000347005,9606.ENSP00000355471,…
GO Process	GO:0000086	G2/M transition of mitotic cell cycle	3.89e-08	19	134	AURKA,CDC25B,CCNB1,CEP164,HAUS1,CCNB2,PLK1,BIRC5,CDC25A,KHDRBS1,CDC25C,CUL1,PCNT,NEK2,NES,CNTRL,ODF2,CKAP5,BORA	9606.ENSP00000216911,9606.ENSP00000245960,9606.ENSP00000256442,9606.ENSP00000278935,9606.ENSP00000282058,9606.ENSP00000288207,9606.ENSP00000300093,9606.ENSP00000301633,9606.ENSP00000303706,9606.ENSP00000313829,9606.ENSP00000321656,9606.ENSP00000326804,9606.ENSP00000352572,9606.ENSP00000355966,9606.ENSP00000357206,9606.ENSP00000362962,9606.ENSP00000403453,9606.ENSP00000432768,9606.ENSP00000479266
GO Process	GO:0060255	Regulation of macromolecule metabolic process	4.37e-08	193	6407	TARBP1,CAMKK1,CDC6,AURKA,HNRNPL,ERF,CAV2,KITLG,FBXO5,NR3C1,MSH2,MSH6,FASTKD2,PRRX1,SNRPA,CDC25B,DLGAP5,YEATS4,KLF2,DHX29,FUS,SMARCC1,CCNB1,IRAK2,NAT10,CDK4,USP37,BRIP1,LRPPRC,TIPIN,EED,CENPE,NBN,HNRNPH3,SLC2A4RG,CPSF6,NAF1,PM20D2,ZNF215,NPAT,ZFP36L2,RIOK2,HNRNPU,ATAD2,FZD1,CCNB2,EIF5B,CIART,BAX,HMGB2,ABCE1,TRA2A,RAD21,PLK1,CDT1,BIRC5,CDC25A,GTPBP2,ARL6IP1,CDCA7,ESCO2,CBX2,RMI2,RNF26,CLSPN,ATAD5,K…	9606.ENSP00000040877,9606.ENSP00000158166,9606.ENSP00000209728,9606.ENSP00000216911,9606.ENSP00000221419,9606.ENSP00000222329,9606.ENSP00000222693,9606.ENSP00000228280,9606.ENSP00000229758,9606.ENSP00000231509,9606.ENSP00000233146,9606.ENSP00000234420,9606.ENSP00000236980,9606.ENSP00000239461,9606.ENSP00000243563,9606.ENSP00000245960,9606.ENSP00000247191,9606.ENSP00000247843,9606.ENSP00000248071,…
GO Process	GO:0000077	DNA damage checkpoint	7.27e-08	19	140	AURKA,MSH2,CCNB1,BRIP1,TIPIN,NBN,BAX,PLK1,CLSPN,CDC25C,E2F7,E2F1,DTL,INTS7,TFDP1,PCNA,CHEK1,BRCA1,E2F8	9606.ENSP00000216911,9606.ENSP00000233146,9606.ENSP00000256442,9606.ENSP00000259008,9606.ENSP00000261881,9606.ENSP00000265433,9606.ENSP00000293288,9606.ENSP00000300093,9606.ENSP00000312995,9606.ENSP00000321656,9606.ENSP00000323246,9606.ENSP00000345571,9606.ENSP00000355958,9606.ENSP00000355961,9606.ENSP00000364519,9606.ENSP00000368458,9606.ENSP00000388648,9606.ENSP00000418960,9606.ENSP00000481103
GO Process	GO:0051252	Regulation of rna metabolic process	7.58e-08	129	3722	TARBP1,CDC6,HNRNPL,ERF,FBXO5,NR3C1,FASTKD2,PRRX1,SNRPA,DLGAP5,YEATS4,KLF2,FUS,SMARCC1,CCNB1,IRAK2,BRIP1,LRPPRC,EED,HNRNPH3,SLC2A4RG,CPSF6,NAF1,ZNF215,NPAT,ZFP36L2,RIOK2,HNRNPU,ATAD2,FZD1,CIART,HMGB2,ABCE1,TRA2A,RAD21,PLK1,CDT1,BIRC5,CDCA7,CBX2,KHDRBS1,NCL,BASP1,F2R,E2F7,CIRH1A,MINA,H1FX,SPIN4,MTDH,ZNF326,GTF2F2,HNRNPA1,LIN54,H1F0,PTGES2,HMGB1,E2F1,PRKAA1,HNRNPA2B1,HNRNPH1,PTBP1,MAP3K5,DLX1,E2F2,T…	9606.ENSP00000040877,9606.ENSP00000209728,9606.ENSP00000221419,9606.ENSP00000222329,9606.ENSP00000229758,9606.ENSP00000231509,9606.ENSP00000236980,9606.ENSP00000239461,9606.ENSP00000243563,9606.ENSP00000247191,9606.ENSP00000247843,9606.ENSP00000248071,9606.ENSP00000254108,9606.ENSP00000254480,9606.ENSP00000256442,9606.ENSP00000256458,9606.ENSP00000259008,9606.ENSP00000260665,9606.ENSP00000263360,…
GO Process	GO:0033043	Regulation of organelle organization	7.99e-08	63	1306	CDC6,AURKA,CAV2,FBXO5,DLGAP5,CCNB1,NAT10,EED,MCM2,CENPE,NBN,NAF1,RIOK2,HNRNPU,ATAD2,BAX,RAD21,PLK1,CDT1,BIRC5,BUB1,FEN1,ARL6IP1,RMI2,TLK2,CDC25C,PMAIP1,PIF1,H1FX,HNRNPA1,H1F0,E2F1,PRKAA1,HNRNPA2B1,IQGAP3,PARP1,CENPF,NEK2,NES,MLLT11,PSRC1,CNTRL,TFDP1,SEPT8,CNTROB,SDC1,FSCN1,PTTG1,CCNF,PAXIP1,CHEK1,GNL3,ODF2,CDC45,TOP2A,BAP1,BRCA1,CKAP5,DDX11,HNRNPC,BORA,MYO19,PHF19	9606.ENSP00000209728,9606.ENSP00000216911,9606.ENSP00000222693,9606.ENSP00000229758,9606.ENSP00000247191,9606.ENSP00000256442,9606.ENSP00000257829,9606.ENSP00000263360,9606.ENSP00000265056,9606.ENSP00000265148,9606.ENSP00000265433,9606.ENSP00000274054,9606.ENSP00000283109,9606.ENSP00000283179,9606.ENSP00000287394,9606.ENSP00000293288,9606.ENSP00000297338,9606.ENSP00000300093,9606.ENSP00000301019,…
GO Process	GO:0044774	Mitotic dna integrity checkpoint	8.62e-08	17	109	CDC6,AURKA,MSH2,CCNB1,TIPIN,NBN,BAX,CLSPN,CDC25C,E2F7,E2F1,NAE1,ORC1,TFDP1,PCNA,TOP2A,E2F8	9606.ENSP00000209728,9606.ENSP00000216911,9606.ENSP00000233146,9606.ENSP00000256442,9606.ENSP00000261881,9606.ENSP00000265433,9606.ENSP00000293288,9606.ENSP00000312995,9606.ENSP00000321656,9606.ENSP00000323246,9606.ENSP00000345571,9606.ENSP00000351990,9606.ENSP00000360623,9606.ENSP00000364519,9606.ENSP00000368458,9606.ENSP00000411532,9606.ENSP00000481103
GO Process	GO:0009411	Response to uv	1.07e-07	19	144	MSH2,MSH6,DDB2,TIPIN,POLD3,RAD18,BAX,CDC25A,FEN1,NDNL2,PRKAA1,PARP1,DTL,PCNA,HMGN1,CDKN2D,CHEK1,POLD1,NEDD4	9606.ENSP00000233146,9606.ENSP00000234420,9606.ENSP00000256996,9606.ENSP00000261881,9606.ENSP00000263681,9606.ENSP00000264926,9606.ENSP00000293288,9606.ENSP00000303706,9606.ENSP00000305480,9606.ENSP00000330694,9606.ENSP00000346148,9606.ENSP00000355759,9606.ENSP00000355958,9606.ENSP00000368458,9606.ENSP00000370125,9606.ENSP00000377224,9606.ENSP00000388648,9606.ENSP00000406046,9606.ENSP00000424827
GO Process	GO:0007088	Regulation of mitotic nuclear division	1.09e-07	20	162	CDC6,AURKA,CAV2,FBXO5,DLGAP5,CCNB1,CENPE,RIOK2,HNRNPU,RAD21,PLK1,CDT1,BIRC5,BUB1,CDC25C,CENPF,NEK2,PTTG1,CHEK1,BORA	9606.ENSP00000209728,9606.ENSP00000216911,9606.ENSP00000222693,9606.ENSP00000229758,9606.ENSP00000247191,9606.ENSP00000256442,9606.ENSP00000265148,9606.ENSP00000283109,9606.ENSP00000283179,9606.ENSP00000297338,9606.ENSP00000300093,9606.ENSP00000301019,9606.ENSP00000301633,9606.ENSP00000302530,9606.ENSP00000321656,9606.ENSP00000355922,9606.ENSP00000355966,9606.ENSP00000377536,9606.ENSP00000388648,…
GO Process	GO:0000723	Telomere maintenance	1.21e-07	17	112	POLE2,POLD3,NBN,FEN1,PIF1,PRIM1,DNA2,EXO1,PARP1,DCLRE1B,PCNA,RFC3,RFC1,RFC4,POLD1,CCNE2,PRIM2	9606.ENSP00000216367,9606.ENSP00000263681,9606.ENSP00000265433,9606.ENSP00000305480,9606.ENSP00000328174,9606.ENSP00000350491,9606.ENSP00000351185,9606.ENSP00000355506,9606.ENSP00000355759,9606.ENSP00000358576,9606.ENSP00000368458,9606.ENSP00000369411,9606.ENSP00000371321,9606.ENSP00000376272,9606.ENSP00000406046,9606.ENSP00000429089,9606.ENSP00000484105
GO Process	GO:0033047	Regulation of mitotic sister chromatid segregation	1.88e-07	14	71	CDC6,FBXO5,DLGAP5,CCNB1,CENPE,RIOK2,HNRNPU,RAD21,PLK1,CDT1,BIRC5,BUB1,CENPF,PTTG1	9606.ENSP00000209728,9606.ENSP00000229758,9606.ENSP00000247191,9606.ENSP00000256442,9606.ENSP00000265148,9606.ENSP00000283109,9606.ENSP00000283179,9606.ENSP00000297338,9606.ENSP00000300093,9606.ENSP00000301019,9606.ENSP00000301633,9606.ENSP00000302530,9606.ENSP00000355922,9606.ENSP00000377536
GO Process	GO:0000727	Double-strand break repair via break-induced replication	1.94e-07	8	11	MCM5,GINS2,MCM4,MCM6,MCM2,MCM7,CDC45,MCM3	9606.ENSP00000216122,9606.ENSP00000253462,9606.ENSP00000262105,9606.ENSP00000264156,9606.ENSP00000265056,9606.ENSP00000307288,9606.ENSP00000405726,9606.ENSP00000480987
GO Process	GO:0042254	Ribosome biogenesis	2.1e-07	26	292	FRG1,RRP9,FASTKD2,DHX29,NAT10,URB2,UTP20,NAF1,RIOK2,ABCE1,NOL6,WDR3,CIRH1A,MINA,TFB2M,RRP15,SURF6,GNL2,PAK1IP1,EXOSC9,RPP40,URB1,NOLC1,WDR74,NOL8,RRP12	9606.ENSP00000226798,9606.ENSP00000232888,9606.ENSP00000236980,9606.ENSP00000251636,9606.ENSP00000257829,9606.ENSP00000258243,9606.ENSP00000261637,9606.ENSP00000274054,9606.ENSP00000283109,9606.ENSP00000296577,9606.ENSP00000297990,9606.ENSP00000308179,9606.ENSP00000327179,9606.ENSP00000328251,9606.ENSP00000355471,9606.ENSP00000355899,9606.ENSP00000361092,9606.ENSP00000362153,9606.ENSP00000368887,…
GO Process	GO:0043484	Regulation of rna splicing	2.29e-07	19	152	HNRNPL,FUS,HNRNPH3,HNRNPU,TRA2A,KHDRBS1,NCL,ZNF326,HNRNPA1,HNRNPA2B1,HNRNPH1,PTBP1,RBMX,HNRNPK,HNRNPLL,CDK12,HNRNPF,SRSF10,SNRNP70	9606.ENSP00000221419,9606.ENSP00000254108,9606.ENSP00000265866,9606.ENSP00000283179,9606.ENSP00000297071,9606.ENSP00000313829,9606.ENSP00000318195,9606.ENSP00000340796,9606.ENSP00000341826,9606.ENSP00000346694,9606.ENSP00000349168,9606.ENSP00000349428,9606.ENSP00000359645,9606.ENSP00000365439,9606.ENSP00000390625,9606.ENSP00000398880,9606.ENSP00000400433,9606.ENSP00000420195,9606.ENSP00000472998
GO Process	GO:0000398	mRNA splicing, via spliceosome	2.36e-07	26	294	HNRNPL,FRG1,SNRPA,FUS,TGS1,HNRNPH3,HNRNPU,TRA2A,SNRNP200,WDR33,CSTF2T,GTF2F2,HNRNPA1,HNRNPA2B1,CGI-74,HNRNPH1,PTBP1,SMNDC1,RBMX,HNRNPK,HNRNPA3,PRPF40A,HNRNPF,SRSF10,HNRNPC,SNRNP70	9606.ENSP00000221419,9606.ENSP00000226798,9606.ENSP00000243563,9606.ENSP00000254108,9606.ENSP00000260129,9606.ENSP00000265866,9606.ENSP00000283179,9606.ENSP00000297071,9606.ENSP00000317123,9606.ENSP00000325377,9606.ENSP00000332444,9606.ENSP00000340823,9606.ENSP00000341826,9606.ENSP00000346694,9606.ENSP00000347005,9606.ENSP00000349168,9606.ENSP00000349428,9606.ENSP00000358616,9606.ENSP00000359645,…
GO Process	GO:0045787	Positive regulation of cell cycle	2.49e-07	30	388	CDC6,AURKA,FBXO5,CDC25B,DLGAP5,CCNB1,CDK4,HNRNPU,BAX,RAD21,CDT1,BIRC5,CDC25A,FEN1,ATAD5,CDC25C,E2F7,DBF4B,E2F1,DTL,KIF14,PSRC1,TFDP1,PCNA,CIT,CHEK1,CDC45,BRCA1,DDX11,E2F8	9606.ENSP00000209728,9606.ENSP00000216911,9606.ENSP00000229758,9606.ENSP00000245960,9606.ENSP00000247191,9606.ENSP00000256442,9606.ENSP00000257904,9606.ENSP00000283179,9606.ENSP00000293288,9606.ENSP00000297338,9606.ENSP00000301019,9606.ENSP00000301633,9606.ENSP00000303706,9606.ENSP00000305480,9606.ENSP00000313171,9606.ENSP00000321656,9606.ENSP00000323246,9606.ENSP00000323663,9606.ENSP00000345571,…
GO Process	GO:0010965	Regulation of mitotic sister chromatid separation	2.51e-07	13	60	CDC6,FBXO5,DLGAP5,CCNB1,CENPE,RIOK2,RAD21,PLK1,CDT1,BIRC5,BUB1,CENPF,PTTG1	9606.ENSP00000209728,9606.ENSP00000229758,9606.ENSP00000247191,9606.ENSP00000256442,9606.ENSP00000265148,9606.ENSP00000283109,9606.ENSP00000297338,9606.ENSP00000300093,9606.ENSP00000301019,9606.ENSP00000301633,9606.ENSP00000302530,9606.ENSP00000355922,9606.ENSP00000377536
GO Process	GO:0065004	protein-DNA complex assembly	3e-07	22	213	MCM5,NASP,DDB2,MCM4,MCM6,MCM2,CENPE,HMGB2,CDT1,CHAF1A,MCM7,CHAF1B,H1FX,CENPQ,H1F0,PARP1,CENPF,HELLS,CDC45,GTF2H3,NAP1L1,MCM3	9606.ENSP00000216122,9606.ENSP00000255120,9606.ENSP00000256996,9606.ENSP00000262105,9606.ENSP00000264156,9606.ENSP00000265056,9606.ENSP00000265148,9606.ENSP00000296503,9606.ENSP00000301019,9606.ENSP00000301280,9606.ENSP00000307288,9606.ENSP00000315700,9606.ENSP00000329662,9606.ENSP00000337289,9606.ENSP00000344504,9606.ENSP00000355759,9606.ENSP00000355922,9606.ENSP00000377601,9606.ENSP00000405726,…
GO Process	GO:0071824	protein-DNA complex subunit organization	3.07e-07	24	255	MCM5,SMARCC1,NASP,DDB2,MCM4,MCM6,MCM2,CENPE,HMGB2,CDT1,CHAF1A,MCM7,CHAF1B,H1FX,CENPQ,H1F0,PARP1,CENPF,HELLS,PSME4,CDC45,GTF2H3,NAP1L1,MCM3	9606.ENSP00000216122,9606.ENSP00000254480,9606.ENSP00000255120,9606.ENSP00000256996,9606.ENSP00000262105,9606.ENSP00000264156,9606.ENSP00000265056,9606.ENSP00000265148,9606.ENSP00000296503,9606.ENSP00000301019,9606.ENSP00000301280,9606.ENSP00000307288,9606.ENSP00000315700,9606.ENSP00000329662,9606.ENSP00000337289,9606.ENSP00000344504,9606.ENSP00000355759,9606.ENSP00000355922,9606.ENSP00000377601,…
GO Process	GO:0009987	Cellular process	3.96e-07	356	15024	RALBP1,MRI1,TARBP1,CAMKK1,CDC6,ATP5D,TIMM13,MCM5,POLE2,AURKA,PYCRL,HNRNPL,PLIN3,ERF,CAV2,FRG1,KITLG,FBXO5,NR3C1,RRP9,MSH2,MSH6,FASTKD2,PRRX1,UNG,SNRPA,CDC25B,DLGAP5,YEATS4,KLF2,DHX29,SNX4,GINS2,FUS,SMARCC1,NASP,CCNB1,IRAK2,DDB2,NAT10,CDK4,TROAP,URB2,USP37,RSAD1,TEX2,BRIP1,RANBP6,TGS1,ARHGAP29,LRPPRC,PPIG,LOC81691,RNF138,UTP20,MPP5,MESDC2,TIPIN,MCM4,GINS1,EED,POLD3,WDR76,MCM6,PPAT,RAD18,MRPL3,MCM2…	9606.ENSP00000019317,9606.ENSP00000040663,9606.ENSP00000040877,9606.ENSP00000158166,9606.ENSP00000209728,9606.ENSP00000215375,9606.ENSP00000215570,9606.ENSP00000216122,9606.ENSP00000216367,9606.ENSP00000216911,9606.ENSP00000220966,9606.ENSP00000221419,9606.ENSP00000221957,9606.ENSP00000222329,9606.ENSP00000222693,9606.ENSP00000226798,9606.ENSP00000228280,9606.ENSP00000229758,9606.ENSP00000231509,…
GO Process	GO:0042770	Signal transduction in response to dna damage	4.09e-07	16	107	AURKA,CCNB1,NBN,BAX,PLK1,ATAD5,CDC25C,E2F7,E2F1,DTL,TFDP1,PCNA,PAXIP1,CHEK1,BRCA1,E2F8	9606.ENSP00000216911,9606.ENSP00000256442,9606.ENSP00000265433,9606.ENSP00000293288,9606.ENSP00000300093,9606.ENSP00000313171,9606.ENSP00000321656,9606.ENSP00000323246,9606.ENSP00000345571,9606.ENSP00000355958,9606.ENSP00000364519,9606.ENSP00000368458,9606.ENSP00000384048,9606.ENSP00000388648,9606.ENSP00000418960,9606.ENSP00000481103
GO Process	GO:0090329	Regulation of dna-dependent dna replication	4.45e-07	12	51	FBXO5,TIPIN,NBN,CDT1,DSCC1,E2F7,DBF4B,PCNA,RFC3,RFC4,SLFN11,E2F8	9606.ENSP00000229758,9606.ENSP00000261881,9606.ENSP00000265433,9606.ENSP00000301019,9606.ENSP00000322180,9606.ENSP00000323246,9606.ENSP00000323663,9606.ENSP00000368458,9606.ENSP00000369411,9606.ENSP00000376272,9606.ENSP00000378067,9606.ENSP00000481103
GO Process	GO:0006301	Postreplication repair	5.29e-07	12	52	POLE2,MSH2,POLD3,RAD18,WDR33,DTL,PCNA,RFC3,RFC1,RFC4,POLD1,BRCA1	9606.ENSP00000216367,9606.ENSP00000233146,9606.ENSP00000263681,9606.ENSP00000264926,9606.ENSP00000325377,9606.ENSP00000355958,9606.ENSP00000368458,9606.ENSP00000369411,9606.ENSP00000371321,9606.ENSP00000376272,9606.ENSP00000406046,9606.ENSP00000418960
GO Process	GO:0016071	mRNA metabolic process	7.52e-07	40	678	HNRNPL,FRG1,SNRPA,FUS,TGS1,HNRNPH3,CPSF6,ZFP36L2,HNRNPU,TSEN2,TRA2A,GTPBP2,KHDRBS1,SNRNP200,WDR33,CSTF2T,PNRC2,ZNF326,GTF2F2,HNRNPA1,HNRNPA2B1,CGI-74,PUS7,HNRNPH1,PTBP1,SMNDC1,RBMX,HNRNPK,EXOSC9,HNRNPA3,PRPF40A,HNRNPLL,CDK12,HNRNPF,SLBP,SRSF10,GTF2H3,HNRNPC,SUGP2,SNRNP70	9606.ENSP00000221419,9606.ENSP00000226798,9606.ENSP00000243563,9606.ENSP00000254108,9606.ENSP00000260129,9606.ENSP00000265866,9606.ENSP00000266679,9606.ENSP00000282388,9606.ENSP00000283179,9606.ENSP00000284995,9606.ENSP00000297071,9606.ENSP00000303997,9606.ENSP00000313829,9606.ENSP00000317123,9606.ENSP00000325377,9606.ENSP00000332444,9606.ENSP00000334840,9606.ENSP00000340796,9606.ENSP00000340823,…
GO Process	GO:1901992	Positive regulation of mitotic cell cycle phase transition	8.2e-07	14	82	CDC6,FBXO5,CDC25B,DLGAP5,CCNB1,CDK4,CDT1,BIRC5,CDC25A,CDC25C,DBF4B,DTL,TFDP1,CDC45	9606.ENSP00000209728,9606.ENSP00000229758,9606.ENSP00000245960,9606.ENSP00000247191,9606.ENSP00000256442,9606.ENSP00000257904,9606.ENSP00000301019,9606.ENSP00000301633,9606.ENSP00000303706,9606.ENSP00000321656,9606.ENSP00000323663,9606.ENSP00000355958,9606.ENSP00000364519,9606.ENSP00000405726
GO Process	GO:1901989	Positive regulation of cell cycle phase transition	1.01e-06	15	99	CDC6,FBXO5,CDC25B,DLGAP5,CCNB1,CDK4,CDT1,BIRC5,CDC25A,ATAD5,CDC25C,DBF4B,DTL,TFDP1,CDC45	9606.ENSP00000209728,9606.ENSP00000229758,9606.ENSP00000245960,9606.ENSP00000247191,9606.ENSP00000256442,9606.ENSP00000257904,9606.ENSP00000301019,9606.ENSP00000301633,9606.ENSP00000303706,9606.ENSP00000313171,9606.ENSP00000321656,9606.ENSP00000323663,9606.ENSP00000355958,9606.ENSP00000364519,9606.ENSP00000405726
GO Process	GO:0030071	Regulation of mitotic metaphase/anaphase transition	1.04e-06	12	56	CDC6,FBXO5,DLGAP5,CCNB1,CENPE,RIOK2,RAD21,PLK1,CDT1,BIRC5,BUB1,CENPF	9606.ENSP00000209728,9606.ENSP00000229758,9606.ENSP00000247191,9606.ENSP00000256442,9606.ENSP00000265148,9606.ENSP00000283109,9606.ENSP00000297338,9606.ENSP00000300093,9606.ENSP00000301019,9606.ENSP00000301633,9606.ENSP00000302530,9606.ENSP00000355922
GO Process	GO:0019222	Regulation of metabolic process	1.17e-06	199	6948	TARBP1,CAMKK1,CDC6,AURKA,HNRNPL,ERF,CAV2,KITLG,FBXO5,NR3C1,MSH2,MSH6,FASTKD2,PRRX1,SNRPA,CDC25B,DLGAP5,YEATS4,KLF2,DHX29,FUS,SMARCC1,CCNB1,IRAK2,NAT10,CDK4,USP37,BRIP1,TGS1,LRPPRC,TIPIN,EED,CENPE,NBN,HNRNPH3,SLC2A4RG,CPSF6,TRIM65,NAF1,PM20D2,ZNF215,NPAT,ZFP36L2,RIOK2,HNRNPU,ATAD2,FZD1,CCNB2,EIF5B,CIART,BAX,HMGB2,ABCE1,TRA2A,RAD21,PLK1,CDT1,BIRC5,CDC25A,GTPBP2,ARL6IP1,CDCA7,ESCO2,MCM7,CBX2,RMI2,RN…	9606.ENSP00000040877,9606.ENSP00000158166,9606.ENSP00000209728,9606.ENSP00000216911,9606.ENSP00000221419,9606.ENSP00000222329,9606.ENSP00000222693,9606.ENSP00000228280,9606.ENSP00000229758,9606.ENSP00000231509,9606.ENSP00000233146,9606.ENSP00000234420,9606.ENSP00000236980,9606.ENSP00000239461,9606.ENSP00000243563,9606.ENSP00000245960,9606.ENSP00000247191,9606.ENSP00000247843,9606.ENSP00000248071,…
GO Process	GO:0010557	Positive regulation of macromolecule biosynthetic process	1.34e-06	77	1906	HNRNPL,NR3C1,FASTKD2,PRRX1,DLGAP5,YEATS4,KLF2,DHX29,FUS,SMARCC1,NAT10,CDK4,NAF1,NPAT,HNRNPU,ATAD2,FZD1,HMGB2,CDT1,ATAD5,KHDRBS1,NCL,F2R,DSCC1,E2F7,DBF4B,H1FX,MTDH,GTF2F2,HNRNPA1,H1F0,PTGES2,HMGB1,E2F1,SVIP,PRKAA1,HNRNPA2B1,DNA2,PASK,MAP3K5,DLX1,E2F2,TFB2M,PARP1,NEK2,MLLT11,PSRC1,BLOC1S2,RBMX,JUN,RBL1,ZNF367,TFDP1,HNRNPK,PCNA,EXOSC9,RFC3,HMGN1,RFC1,RFC4,NRF1,PAXIP1,NOLC1,CHEK1,GNL3,ATXN7L3,CDK12,T…	9606.ENSP00000221419,9606.ENSP00000231509,9606.ENSP00000236980,9606.ENSP00000239461,9606.ENSP00000247191,9606.ENSP00000247843,9606.ENSP00000248071,9606.ENSP00000251636,9606.ENSP00000254108,9606.ENSP00000254480,9606.ENSP00000257829,9606.ENSP00000257904,9606.ENSP00000274054,9606.ENSP00000278612,9606.ENSP00000283179,9606.ENSP00000287394,9606.ENSP00000287934,9606.ENSP00000296503,9606.ENSP00000301019,…
GO Process	GO:0045934	Negative regulation of nucleobase-containing compound metabolic process	1.58e-06	66	1528	HNRNPL,ERF,NR3C1,MSH2,MSH6,PRRX1,KLF2,FUS,NAT10,LRPPRC,EED,NBN,NAF1,ZNF215,NPAT,HNRNPU,FZD1,CIART,HMGB2,ABCE1,PLK1,BIRC5,CBX2,RMI2,KHDRBS1,BASP1,E2F7,PIF1,MINA,H1FX,MTDH,HNRNPA1,H1F0,HMGB1,E2F1,HNRNPA2B1,PTBP1,DLX1,E2F2,IRF2BP2,PARP1,CENPF,RBMX,JUN,RBL1,HNRNPK,PCNA,RFC1,HELLS,RBBP8,CBX6,NRG1,TONSL,MXD3,BEND3,BAP1,BRCA1,SRSF10,NEDD4,SAMD1,RITA1,HNRNPC,TAF15,DPF3,UHRF1,E2F8	9606.ENSP00000221419,9606.ENSP00000222329,9606.ENSP00000231509,9606.ENSP00000233146,9606.ENSP00000234420,9606.ENSP00000239461,9606.ENSP00000248071,9606.ENSP00000254108,9606.ENSP00000257829,9606.ENSP00000260665,9606.ENSP00000263360,9606.ENSP00000265433,9606.ENSP00000274054,9606.ENSP00000278319,9606.ENSP00000278612,9606.ENSP00000283179,9606.ENSP00000287934,9606.ENSP00000290363,9606.ENSP00000296503,…
GO Process	GO:0140014	Mitotic nuclear division	1.58e-06	18	156	AURKA,DLGAP5,CCNB1,CENPE,NUF2,CCNB2,PLK1,CDT1,BIRC5,DSCC1,NCAPD2,CHAMP1,NEK2,KIF14,PSRC1,KIF2C,PRC1,DSN1	9606.ENSP00000216911,9606.ENSP00000247191,9606.ENSP00000256442,9606.ENSP00000265148,9606.ENSP00000271452,9606.ENSP00000288207,9606.ENSP00000300093,9606.ENSP00000301019,9606.ENSP00000301633,9606.ENSP00000322180,9606.ENSP00000325017,9606.ENSP00000354730,9606.ENSP00000355966,9606.ENSP00000356319,9606.ENSP00000358925,9606.ENSP00000361298,9606.ENSP00000377793,9606.ENSP00000389810
GO Process	GO:0000083	Regulation of transcription involved in g1/s transition of mitotic cell cycle	1.66e-06	10	35	CDC6,FBXO5,NPAT,CDT1,E2F7,E2F1,ORC1,TFDP1,PCNA,CDC45	9606.ENSP00000209728,9606.ENSP00000229758,9606.ENSP00000278612,9606.ENSP00000301019,9606.ENSP00000323246,9606.ENSP00000345571,9606.ENSP00000360623,9606.ENSP00000364519,9606.ENSP00000368458,9606.ENSP00000405726
GO Process	GO:0000076	DNA replication checkpoint	1.99e-06	8	17	CDC6,TIPIN,CDT1,CLSPN,DNA2,NAE1,ORC1,CDC45	9606.ENSP00000209728,9606.ENSP00000261881,9606.ENSP00000301019,9606.ENSP00000312995,9606.ENSP00000351185,9606.ENSP00000351990,9606.ENSP00000360623,9606.ENSP00000405726
GO Process	GO:0072331	Signal transduction by p53 class mediator	2.13e-06	16	123	AURKA,MSH2,CCNB1,NBN,BAX,ATAD5,CDC25C,E2F7,PMAIP1,E2F1,E2F2,TFDP1,PCNA,PAXIP1,BRCA1,E2F8	9606.ENSP00000216911,9606.ENSP00000233146,9606.ENSP00000256442,9606.ENSP00000265433,9606.ENSP00000293288,9606.ENSP00000313171,9606.ENSP00000321656,9606.ENSP00000323246,9606.ENSP00000326119,9606.ENSP00000345571,9606.ENSP00000355249,9606.ENSP00000364519,9606.ENSP00000368458,9606.ENSP00000384048,9606.ENSP00000418960,9606.ENSP00000481103
GO Process	GO:0072422	Signal transduction involved in dna damage checkpoint	2.21e-06	13	75	AURKA,CCNB1,BAX,PLK1,CDC25C,E2F7,E2F1,DTL,TFDP1,PCNA,CHEK1,BRCA1,E2F8	9606.ENSP00000216911,9606.ENSP00000256442,9606.ENSP00000293288,9606.ENSP00000300093,9606.ENSP00000321656,9606.ENSP00000323246,9606.ENSP00000345571,9606.ENSP00000355958,9606.ENSP00000364519,9606.ENSP00000368458,9606.ENSP00000388648,9606.ENSP00000418960,9606.ENSP00000481103
GO Process	GO:0000070	Mitotic sister chromatid segregation	2.6e-06	15	108	DLGAP5,CCNB1,CENPE,NUF2,PLK1,CDT1,DSCC1,NCAPD2,CHAMP1,NEK2,KIF14,PSRC1,KIF2C,PRC1,DSN1	9606.ENSP00000247191,9606.ENSP00000256442,9606.ENSP00000265148,9606.ENSP00000271452,9606.ENSP00000300093,9606.ENSP00000301019,9606.ENSP00000322180,9606.ENSP00000325017,9606.ENSP00000354730,9606.ENSP00000355966,9606.ENSP00000356319,9606.ENSP00000358925,9606.ENSP00000361298,9606.ENSP00000377793,9606.ENSP00000389810
GO Process	GO:0051173	Positive regulation of nitrogen compound metabolic process	2.81e-06	111	3239	CAMKK1,CDC6,AURKA,HNRNPL,CAV2,KITLG,NR3C1,MSH2,FASTKD2,PRRX1,CDC25B,DLGAP5,YEATS4,KLF2,DHX29,FUS,SMARCC1,CCNB1,IRAK2,NAT10,CDK4,EED,CENPE,NBN,NAF1,NPAT,ZFP36L2,RIOK2,HNRNPU,ATAD2,FZD1,BAX,HMGB2,TRA2A,PLK1,CLSPN,ATAD5,KHDRBS1,NCL,F2R,DSCC1,E2F7,DBF4B,STK25,PMAIP1,H1FX,NDNL2,MTDH,GTF2F2,HNRNPA1,H1F0,PTGES2,HMGB1,E2F1,SVIP,PRKAA1,HNRNPA2B1,PTBP1,PASK,MAP3K5,IQGAP3,DLX1,E2F2,TFB2M,PARP1,DTL,NEK2,KIF1…	9606.ENSP00000158166,9606.ENSP00000209728,9606.ENSP00000216911,9606.ENSP00000221419,9606.ENSP00000222693,9606.ENSP00000228280,9606.ENSP00000231509,9606.ENSP00000233146,9606.ENSP00000236980,9606.ENSP00000239461,9606.ENSP00000245960,9606.ENSP00000247191,9606.ENSP00000247843,9606.ENSP00000248071,9606.ENSP00000251636,9606.ENSP00000254108,9606.ENSP00000254480,9606.ENSP00000256442,9606.ENSP00000256458,…
GO Process	GO:1903046	Meiotic cell cycle process	3.23e-06	18	165	AURKA,FBXO5,MSH6,CDC25B,BRIP1,NUF2,RAD21,PLK1,BUB1,RMI1,NCAPD2,ASPM,RAD54L,PTTG1,FIGNL1,TOP2A,CCNE2,MYBL1	9606.ENSP00000216911,9606.ENSP00000229758,9606.ENSP00000234420,9606.ENSP00000245960,9606.ENSP00000259008,9606.ENSP00000271452,9606.ENSP00000297338,9606.ENSP00000300093,9606.ENSP00000302530,9606.ENSP00000317039,9606.ENSP00000325017,9606.ENSP00000356379,9606.ENSP00000361043,9606.ENSP00000377536,9606.ENSP00000410811,9606.ENSP00000411532,9606.ENSP00000429089,9606.ENSP00000429633
GO Process	GO:0034622	Cellular protein-containing complex assembly	3.88e-06	43	816	ATP5D,MCM5,FBXO5,FASTKD2,DHX29,NASP,DDB2,TGS1,MCM4,MCM6,MCM2,CENPE,CPSF6,NAF1,HMGB2,CDT1,CHAF1A,MCM7,CHAF1B,SNRNP200,H1FX,CENPQ,H1F0,CGI-74,PARP1,CENPF,EIF3A,NDUFAF4,BLOC1S2,RBMX,NDUFB6,HELLS,NRG1,PILRB,CDC45,SRSF10,PDGFC,CKAP5,NUP153,GTF2H3,NAP1L1,TUBGCP5,MCM3	9606.ENSP00000215375,9606.ENSP00000216122,9606.ENSP00000229758,9606.ENSP00000236980,9606.ENSP00000251636,9606.ENSP00000255120,9606.ENSP00000256996,9606.ENSP00000260129,9606.ENSP00000262105,9606.ENSP00000264156,9606.ENSP00000265056,9606.ENSP00000265148,9606.ENSP00000266679,9606.ENSP00000274054,9606.ENSP00000296503,9606.ENSP00000301019,9606.ENSP00000301280,9606.ENSP00000307288,9606.ENSP00000315700,…
GO Process	GO:0031328	Positive regulation of cellular biosynthetic process	4.52e-06	78	2005	HNRNPL,NR3C1,FASTKD2,PRRX1,DLGAP5,YEATS4,KLF2,DHX29,FUS,SMARCC1,NAT10,CDK4,NAF1,NPAT,HNRNPU,ATAD2,FZD1,HMGB2,CDT1,ATAD5,KHDRBS1,NCL,F2R,DSCC1,E2F7,DBF4B,H1FX,MTDH,GTF2F2,HNRNPA1,H1F0,PTGES2,HMGB1,E2F1,SVIP,PRKAA1,HNRNPA2B1,DNA2,PASK,MAP3K5,DLX1,E2F2,TFB2M,PARP1,NEK2,MLLT11,PSRC1,BLOC1S2,RBMX,JUN,RBL1,ZNF367,TFDP1,HNRNPK,PCNA,EXOSC9,RFC3,HMGN1,RFC1,RFC4,NRF1,PAXIP1,NOLC1,CHEK1,SLC25A12,GNL3,ATXN7L…	9606.ENSP00000221419,9606.ENSP00000231509,9606.ENSP00000236980,9606.ENSP00000239461,9606.ENSP00000247191,9606.ENSP00000247843,9606.ENSP00000248071,9606.ENSP00000251636,9606.ENSP00000254108,9606.ENSP00000254480,9606.ENSP00000257829,9606.ENSP00000257904,9606.ENSP00000274054,9606.ENSP00000278612,9606.ENSP00000283179,9606.ENSP00000287394,9606.ENSP00000287934,9606.ENSP00000296503,9606.ENSP00000301019,…
GO Process	GO:0033683	Nucleotide-excision repair, dna incision	4.52e-06	10	40	DDB2,POLD3,FAN1,PARP1,PCNA,RFC3,RFC1,RFC4,POLD1,GTF2H3	9606.ENSP00000256996,9606.ENSP00000263681,9606.ENSP00000354497,9606.ENSP00000355759,9606.ENSP00000368458,9606.ENSP00000369411,9606.ENSP00000371321,9606.ENSP00000376272,9606.ENSP00000406046,9606.ENSP00000445162
GO Process	GO:1902751	Positive regulation of cell cycle g2/m phase transition	5.62e-06	9	30	FBXO5,CDC25B,CCNB1,CDK4,CDC25A,ATAD5,CDC25C,DBF4B,DTL	9606.ENSP00000229758,9606.ENSP00000245960,9606.ENSP00000256442,9606.ENSP00000257904,9606.ENSP00000303706,9606.ENSP00000313171,9606.ENSP00000321656,9606.ENSP00000323663,9606.ENSP00000355958
GO Process	GO:0006325	Chromatin organization	6.69e-06	39	713	AURKA,NR3C1,YEATS4,SMARCC1,NASP,CCNB1,DDB2,EED,MCM2,HNRNPU,ATAD2,HMGB2,CHAF1A,CBX2,CHAF1B,TLK2,MINA,H1FX,CENPQ,H1F0,HMGB1,PRKAA1,RBL1,HMGN1,HELLS,PAXIP1,PSME4,CBX6,CHEK1,ATXN7L3,BEND3,BAP1,DDX11,HNRNPC,NAP1L1,DPF3,UHRF1,HMGN3,PHF19	9606.ENSP00000216911,9606.ENSP00000231509,9606.ENSP00000247843,9606.ENSP00000254480,9606.ENSP00000255120,9606.ENSP00000256442,9606.ENSP00000256996,9606.ENSP00000263360,9606.ENSP00000265056,9606.ENSP00000283179,9606.ENSP00000287394,9606.ENSP00000296503,9606.ENSP00000301280,9606.ENSP00000308750,9606.ENSP00000315700,9606.ENSP00000316512,9606.ENSP00000328251,9606.ENSP00000329662,9606.ENSP00000337289,…
GO Process	GO:0045935	Positive regulation of nucleobase-containing compound metabolic process	8.31e-06	75	1927	NR3C1,MSH2,PRRX1,DLGAP5,YEATS4,KLF2,FUS,SMARCC1,CCNB1,NBN,NAF1,NPAT,ZFP36L2,RIOK2,HNRNPU,ATAD2,FZD1,BAX,HMGB2,TRA2A,ATAD5,NCL,F2R,DSCC1,E2F7,H1FX,MTDH,GTF2F2,HNRNPA1,H1F0,PTGES2,HMGB1,E2F1,PRKAA1,HNRNPA2B1,MAP3K5,DLX1,E2F2,TFB2M,PARP1,NEK2,MLLT11,PSRC1,BLOC1S2,RBMX,JUN,RBL1,ZNF367,TFDP1,HNRNPK,PCNA,EXOSC9,RFC3,HMGN1,RFC1,RFC4,NRF1,PAXIP1,NOLC1,CHEK1,SLC25A12,HNRNPLL,GNL3,ATXN7L3,CDK12,TOP2A,BRCA1…	9606.ENSP00000231509,9606.ENSP00000233146,9606.ENSP00000239461,9606.ENSP00000247191,9606.ENSP00000247843,9606.ENSP00000248071,9606.ENSP00000254108,9606.ENSP00000254480,9606.ENSP00000256442,9606.ENSP00000265433,9606.ENSP00000274054,9606.ENSP00000278612,9606.ENSP00000282388,9606.ENSP00000283109,9606.ENSP00000283179,9606.ENSP00000287394,9606.ENSP00000287934,9606.ENSP00000293288,9606.ENSP00000296503,…
GO Process	GO:0006267	Pre-replicative complex assembly involved in nuclear cell cycle dna replication	8.66e-06	6	7	MCM5,MCM4,MCM6,MCM2,MCM7,MCM3	9606.ENSP00000216122,9606.ENSP00000262105,9606.ENSP00000264156,9606.ENSP00000265056,9606.ENSP00000307288,9606.ENSP00000480987
GO Process	GO:0051054	Positive regulation of dna metabolic process	9.39e-06	19	200	MSH2,FUS,NBN,NAF1,BAX,ATAD5,DSCC1,HNRNPA1,HMGB1,HNRNPA2B1,PARP1,NEK2,PCNA,RFC3,RFC4,PAXIP1,GNL3,BRCA1,DDX11	9606.ENSP00000233146,9606.ENSP00000254108,9606.ENSP00000265433,9606.ENSP00000274054,9606.ENSP00000293288,9606.ENSP00000313171,9606.ENSP00000322180,9606.ENSP00000341826,9606.ENSP00000345347,9606.ENSP00000346694,9606.ENSP00000355759,9606.ENSP00000355966,9606.ENSP00000368458,9606.ENSP00000369411,9606.ENSP00000376272,9606.ENSP00000384048,9606.ENSP00000395772,9606.ENSP00000418960,9606.ENSP00000440402
GO Process	GO:0051984	Positive regulation of chromosome segregation	1.06e-05	9	33	CDC6,DLGAP5,CCNB1,RAD18,HNRNPU,RAD21,CDT1,FEN1,DDX11	9606.ENSP00000209728,9606.ENSP00000247191,9606.ENSP00000256442,9606.ENSP00000264926,9606.ENSP00000283179,9606.ENSP00000297338,9606.ENSP00000301019,9606.ENSP00000305480,9606.ENSP00000440402
GO Process	GO:0031325	Positive regulation of cellular metabolic process	1.12e-05	113	3413	CAMKK1,CDC6,AURKA,HNRNPL,CAV2,KITLG,NR3C1,MSH2,FASTKD2,PRRX1,CDC25B,DLGAP5,YEATS4,KLF2,DHX29,FUS,SMARCC1,CCNB1,IRAK2,NAT10,CDK4,EED,CENPE,NBN,TRIM65,NAF1,NPAT,ZFP36L2,RIOK2,HNRNPU,ATAD2,FZD1,BAX,HMGB2,TRA2A,PLK1,CDT1,CLSPN,ATAD5,KHDRBS1,NCL,F2R,DSCC1,E2F7,DBF4B,STK25,PMAIP1,H1FX,NDNL2,MTDH,GTF2F2,HNRNPA1,H1F0,PTGES2,HMGB1,E2F1,SVIP,PRKAA1,HNRNPA2B1,PTBP1,DNA2,PASK,MAP3K5,IQGAP3,DLX1,E2F2,TFB2M,PA…	9606.ENSP00000158166,9606.ENSP00000209728,9606.ENSP00000216911,9606.ENSP00000221419,9606.ENSP00000222693,9606.ENSP00000228280,9606.ENSP00000231509,9606.ENSP00000233146,9606.ENSP00000236980,9606.ENSP00000239461,9606.ENSP00000245960,9606.ENSP00000247191,9606.ENSP00000247843,9606.ENSP00000248071,9606.ENSP00000251636,9606.ENSP00000254108,9606.ENSP00000254480,9606.ENSP00000256442,9606.ENSP00000256458,…
GO Process	GO:0051303	Establishment of chromosome localization	1.13e-05	12	73	DLGAP5,CCNB1,CENPE,NUF2,CDT1,BIRC5,CENPQ,CHAMP1,CENPF,KIF14,PSRC1,KIF2C	9606.ENSP00000247191,9606.ENSP00000256442,9606.ENSP00000265148,9606.ENSP00000271452,9606.ENSP00000301019,9606.ENSP00000301633,9606.ENSP00000337289,9606.ENSP00000354730,9606.ENSP00000355922,9606.ENSP00000356319,9606.ENSP00000358925,9606.ENSP00000361298
GO Process	GO:1901796	Regulation of signal transduction by p53 class mediator	1.14e-05	18	182	AURKA,BRIP1,NBN,RMI2,ATAD5,RMI1,PMAIP1,PRKAA1,DNA2,EXO1,HNRNPK,PAK1IP1,RFC3,RFC4,RBBP8,CHEK1,BRCA1,TAF15	9606.ENSP00000216911,9606.ENSP00000259008,9606.ENSP00000265433,9606.ENSP00000310356,9606.ENSP00000313171,9606.ENSP00000317039,9606.ENSP00000326119,9606.ENSP00000346148,9606.ENSP00000351185,9606.ENSP00000355506,9606.ENSP00000365439,9606.ENSP00000368887,9606.ENSP00000369411,9606.ENSP00000376272,9606.ENSP00000382628,9606.ENSP00000388648,9606.ENSP00000418960,9606.ENSP00000474096
GO Process	GO:0034654	Nucleobase-containing compound biosynthetic process	1.77e-05	47	995	ATP5D,POLE2,NR3C1,UNG,CCNB1,CDK4,POLD3,PPAT,DCK,BAX,C10orf2,IMPDH2,DCTPP1,WDR33,CSTF2T,GTF2F2,E2F1,POLR3H,PRIM1,E2F2,TFB2M,PARP1,CENPF,DTL,INTS7,UCK2,AMD1,RBMX,JUN,TFDP1,PCNA,RFC3,MTAP,GART,RFC1,RFC4,CDKN2D,PTTG1,PRPS2,POLR3G,POLD1,SLBP,GMPS,GTF2H3,POLRMT,TAF15,PRIM2	9606.ENSP00000215375,9606.ENSP00000216367,9606.ENSP00000231509,9606.ENSP00000242576,9606.ENSP00000256442,9606.ENSP00000257904,9606.ENSP00000263681,9606.ENSP00000264220,9606.ENSP00000286648,9606.ENSP00000293288,9606.ENSP00000309595,9606.ENSP00000321584,9606.ENSP00000322524,9606.ENSP00000325377,9606.ENSP00000332444,9606.ENSP00000340823,9606.ENSP00000345571,9606.ENSP00000347345,9606.ENSP00000350491,…
GO Process	GO:0018130	Heterocycle biosynthetic process	1.8e-05	49	1061	ATP5D,POLE2,PYCRL,NR3C1,UNG,CCNB1,CDK4,RSAD1,POLD3,PPAT,DCK,BAX,C10orf2,IMPDH2,DCTPP1,WDR33,CSTF2T,GTF2F2,E2F1,POLR3H,PRIM1,E2F2,TFB2M,PARP1,CENPF,DTL,INTS7,UCK2,AMD1,RBMX,JUN,TFDP1,PCNA,RFC3,MTAP,GART,RFC1,RFC4,CDKN2D,PTTG1,PRPS2,POLR3G,POLD1,SLBP,GMPS,GTF2H3,POLRMT,TAF15,PRIM2	9606.ENSP00000215375,9606.ENSP00000216367,9606.ENSP00000220966,9606.ENSP00000231509,9606.ENSP00000242576,9606.ENSP00000256442,9606.ENSP00000257904,9606.ENSP00000258955,9606.ENSP00000263681,9606.ENSP00000264220,9606.ENSP00000286648,9606.ENSP00000293288,9606.ENSP00000309595,9606.ENSP00000321584,9606.ENSP00000322524,9606.ENSP00000325377,9606.ENSP00000332444,9606.ENSP00000340823,9606.ENSP00000345571,…
GO Process	GO:0009314	Response to radiation	1.87e-05	28	431	MSH2,MSH6,DDB2,TIPIN,POLD3,RAD18,BAX,CDC25A,FEN1,TLK2,NDNL2,PRKAA1,NET1,XRCC2,PARP1,DTL,INTS7,JUN,RAD54L,PCNA,HMGN1,CDKN2D,PAXIP1,CHEK1,POLD1,FIGNL1,BRCA1,NEDD4	9606.ENSP00000233146,9606.ENSP00000234420,9606.ENSP00000256996,9606.ENSP00000261881,9606.ENSP00000263681,9606.ENSP00000264926,9606.ENSP00000293288,9606.ENSP00000303706,9606.ENSP00000305480,9606.ENSP00000316512,9606.ENSP00000330694,9606.ENSP00000346148,9606.ENSP00000347134,9606.ENSP00000352271,9606.ENSP00000355759,9606.ENSP00000355958,9606.ENSP00000355961,9606.ENSP00000360266,9606.ENSP00000361043,…
GO Process	GO:0006296	Nucleotide-excision repair, dna incision, 5-to lesion	2.32e-05	9	37	DDB2,POLD3,PARP1,PCNA,RFC3,RFC1,RFC4,POLD1,GTF2H3	9606.ENSP00000256996,9606.ENSP00000263681,9606.ENSP00000355759,9606.ENSP00000368458,9606.ENSP00000369411,9606.ENSP00000371321,9606.ENSP00000376272,9606.ENSP00000406046,9606.ENSP00000445162
GO Process	GO:0140013	Meiotic nuclear division	2.53e-05	16	152	AURKA,FBXO5,CDC25B,BRIP1,NUF2,RAD21,PLK1,BUB1,RMI1,ASPM,RAD54L,PTTG1,FIGNL1,TOP2A,CCNE2,MYBL1	9606.ENSP00000216911,9606.ENSP00000229758,9606.ENSP00000245960,9606.ENSP00000259008,9606.ENSP00000271452,9606.ENSP00000297338,9606.ENSP00000300093,9606.ENSP00000302530,9606.ENSP00000317039,9606.ENSP00000356379,9606.ENSP00000361043,9606.ENSP00000377536,9606.ENSP00000410811,9606.ENSP00000411532,9606.ENSP00000429089,9606.ENSP00000429633
GO Process	GO:0010971	Positive regulation of g2/m transition of mitotic cell cycle	2.97e-05	8	27	FBXO5,CDC25B,CCNB1,CDK4,CDC25A,CDC25C,DBF4B,DTL	9606.ENSP00000229758,9606.ENSP00000245960,9606.ENSP00000256442,9606.ENSP00000257904,9606.ENSP00000303706,9606.ENSP00000321656,9606.ENSP00000323663,9606.ENSP00000355958
GO Process	GO:0030330	DNA damage response, signal transduction by p53 class mediator	3.29e-05	12	82	AURKA,CCNB1,NBN,BAX,CDC25C,E2F7,E2F1,TFDP1,PCNA,PAXIP1,BRCA1,E2F8	9606.ENSP00000216911,9606.ENSP00000256442,9606.ENSP00000265433,9606.ENSP00000293288,9606.ENSP00000321656,9606.ENSP00000323246,9606.ENSP00000345571,9606.ENSP00000364519,9606.ENSP00000368458,9606.ENSP00000384048,9606.ENSP00000418960,9606.ENSP00000481103
GO Process	GO:0042769	DNA damage response, detection of DNA damage	3.33e-05	9	39	POLD3,RAD18,PARP1,DTL,PCNA,RFC3,RFC1,RFC4,POLD1	9606.ENSP00000263681,9606.ENSP00000264926,9606.ENSP00000355759,9606.ENSP00000355958,9606.ENSP00000368458,9606.ENSP00000369411,9606.ENSP00000371321,9606.ENSP00000376272,9606.ENSP00000406046
GO Process	GO:0045931	Positive regulation of mitotic cell cycle	3.4e-05	16	156	CDC6,AURKA,FBXO5,CDC25B,DLGAP5,CCNB1,CDK4,HNRNPU,CDT1,BIRC5,CDC25A,CDC25C,DBF4B,DTL,TFDP1,CDC45	9606.ENSP00000209728,9606.ENSP00000216911,9606.ENSP00000229758,9606.ENSP00000245960,9606.ENSP00000247191,9606.ENSP00000256442,9606.ENSP00000257904,9606.ENSP00000283179,9606.ENSP00000301019,9606.ENSP00000301633,9606.ENSP00000303706,9606.ENSP00000321656,9606.ENSP00000323663,9606.ENSP00000355958,9606.ENSP00000364519,9606.ENSP00000405726
GO Process	GO:2000045	Regulation of g1/s transition of mitotic cell cycle	3.4e-05	16	156	CDC6,AURKA,CCNB1,CDK4,BAX,CDC25C,E2F7,E2F1,KIF14,RBL1,TFDP1,PCNA,CDKN2D,SLFN11,CDC45,E2F8	9606.ENSP00000209728,9606.ENSP00000216911,9606.ENSP00000256442,9606.ENSP00000257904,9606.ENSP00000293288,9606.ENSP00000321656,9606.ENSP00000323246,9606.ENSP00000345571,9606.ENSP00000356319,9606.ENSP00000362768,9606.ENSP00000364519,9606.ENSP00000368458,9606.ENSP00000377224,9606.ENSP00000378067,9606.ENSP00000405726,9606.ENSP00000481103
GO Process	GO:0016072	rRNA metabolic process	4.01e-05	19	223	FRG1,RRP9,NAT10,UTP20,NAF1,RIOK2,NOL6,WDR3,CIRH1A,TFB2M,RRP15,EXOSC9,RPP40,URB1,SLFN11,NOLC1,WDR74,NOL8,RRP12	9606.ENSP00000226798,9606.ENSP00000232888,9606.ENSP00000257829,9606.ENSP00000261637,9606.ENSP00000274054,9606.ENSP00000283109,9606.ENSP00000297990,9606.ENSP00000308179,9606.ENSP00000327179,9606.ENSP00000355471,9606.ENSP00000355899,9606.ENSP00000368984,9606.ENSP00000369391,9606.ENSP00000372199,9606.ENSP00000378067,9606.ENSP00000385410,9606.ENSP00000432119,9606.ENSP00000441140,9606.ENSP00000446184
GO Process	GO:0044773	Mitotic dna damage checkpoint	4.01e-05	13	101	AURKA,MSH2,CCNB1,TIPIN,NBN,BAX,CLSPN,CDC25C,E2F7,E2F1,TFDP1,PCNA,E2F8	9606.ENSP00000216911,9606.ENSP00000233146,9606.ENSP00000256442,9606.ENSP00000261881,9606.ENSP00000265433,9606.ENSP00000293288,9606.ENSP00000312995,9606.ENSP00000321656,9606.ENSP00000323246,9606.ENSP00000345571,9606.ENSP00000364519,9606.ENSP00000368458,9606.ENSP00000481103
GO Process	GO:0051310	Metaphase plate congression	4.37e-05	10	54	CCNB1,CENPE,NUF2,CDT1,CENPQ,CHAMP1,CENPF,KIF14,PSRC1,KIF2C	9606.ENSP00000256442,9606.ENSP00000265148,9606.ENSP00000271452,9606.ENSP00000301019,9606.ENSP00000337289,9606.ENSP00000354730,9606.ENSP00000355922,9606.ENSP00000356319,9606.ENSP00000358925,9606.ENSP00000361298
GO Process	GO:0010604	Positive regulation of macromolecule metabolic process	4.67e-05	115	3600	CAMKK1,CDC6,AURKA,HNRNPL,CAV2,KITLG,NR3C1,MSH2,FASTKD2,PRRX1,CDC25B,DLGAP5,YEATS4,KLF2,DHX29,FUS,SMARCC1,CCNB1,IRAK2,NAT10,CDK4,EED,CENPE,NBN,NAF1,NPAT,ZFP36L2,RIOK2,HNRNPU,ATAD2,FZD1,BAX,HMGB2,TRA2A,PLK1,CDT1,CLSPN,ATAD5,KHDRBS1,NCL,F2R,DSCC1,E2F7,DBF4B,STK25,PMAIP1,H1FX,NDNL2,MTDH,GTF2F2,HNRNPA1,H1F0,PTGES2,HMGB1,E2F1,SVIP,PRKAA1,HNRNPA2B1,POLR3H,PTBP1,DNA2,PASK,MAP3K5,IQGAP3,DLX1,E2F2,TFB2M,PA…	9606.ENSP00000158166,9606.ENSP00000209728,9606.ENSP00000216911,9606.ENSP00000221419,9606.ENSP00000222693,9606.ENSP00000228280,9606.ENSP00000231509,9606.ENSP00000233146,9606.ENSP00000236980,9606.ENSP00000239461,9606.ENSP00000245960,9606.ENSP00000247191,9606.ENSP00000247843,9606.ENSP00000248071,9606.ENSP00000251636,9606.ENSP00000254108,9606.ENSP00000254480,9606.ENSP00000256442,9606.ENSP00000256458,…
GO Process	GO:0019438	Aromatic compound biosynthetic process	5e-05	48	1070	ATP5D,POLE2,NR3C1,UNG,CCNB1,CDK4,RSAD1,POLD3,PPAT,DCK,BAX,C10orf2,IMPDH2,DCTPP1,WDR33,CSTF2T,GTF2F2,E2F1,POLR3H,PRIM1,E2F2,TFB2M,PARP1,CENPF,DTL,INTS7,UCK2,AMD1,RBMX,JUN,TFDP1,PCNA,RFC3,MTAP,GART,RFC1,RFC4,CDKN2D,PTTG1,PRPS2,POLR3G,POLD1,SLBP,GMPS,GTF2H3,POLRMT,TAF15,PRIM2	9606.ENSP00000215375,9606.ENSP00000216367,9606.ENSP00000231509,9606.ENSP00000242576,9606.ENSP00000256442,9606.ENSP00000257904,9606.ENSP00000258955,9606.ENSP00000263681,9606.ENSP00000264220,9606.ENSP00000286648,9606.ENSP00000293288,9606.ENSP00000309595,9606.ENSP00000321584,9606.ENSP00000322524,9606.ENSP00000325377,9606.ENSP00000332444,9606.ENSP00000340823,9606.ENSP00000345571,9606.ENSP00000347345,…
GO Process	GO:1902969	Mitotic dna replication	5e-05	6	11	MCM4,GINS1,MCM6,MCM2,CDC45,MCM3	9606.ENSP00000262105,9606.ENSP00000262460,9606.ENSP00000264156,9606.ENSP00000265056,9606.ENSP00000405726,9606.ENSP00000480987
GO Process	GO:1902750	Negative regulation of cell cycle g2/m phase transition	5.23e-05	13	104	CDC6,AURKA,NBN,RAD21,PLK1,CLSPN,CUL1,NAE1,DTL,ORC1,PSME4,CHEK1,BRCA1	9606.ENSP00000209728,9606.ENSP00000216911,9606.ENSP00000265433,9606.ENSP00000297338,9606.ENSP00000300093,9606.ENSP00000312995,9606.ENSP00000326804,9606.ENSP00000351990,9606.ENSP00000355958,9606.ENSP00000360623,9606.ENSP00000384211,9606.ENSP00000388648,9606.ENSP00000418960
GO Process	GO:2001252	Positive regulation of chromosome organization	5.45e-05	17	184	DLGAP5,CCNB1,EED,NBN,NAF1,HNRNPU,RAD21,CDT1,FEN1,HNRNPA1,HNRNPA2B1,NEK2,PAXIP1,GNL3,BRCA1,DDX11,PHF19	9606.ENSP00000247191,9606.ENSP00000256442,9606.ENSP00000263360,9606.ENSP00000265433,9606.ENSP00000274054,9606.ENSP00000283179,9606.ENSP00000297338,9606.ENSP00000301019,9606.ENSP00000305480,9606.ENSP00000341826,9606.ENSP00000346694,9606.ENSP00000355966,9606.ENSP00000384048,9606.ENSP00000395772,9606.ENSP00000418960,9606.ENSP00000440402,9606.ENSP00000483946
GO Process	GO:0051253	Negative regulation of rna metabolic process	6.11e-05	58	1422	HNRNPL,ERF,NR3C1,PRRX1,KLF2,FUS,LRPPRC,EED,NAF1,ZNF215,NPAT,HNRNPU,FZD1,CIART,HMGB2,ABCE1,PLK1,BIRC5,CBX2,KHDRBS1,BASP1,E2F7,MINA,MTDH,H1F0,HMGB1,E2F1,HNRNPA2B1,PTBP1,DLX1,E2F2,IRF2BP2,PARP1,CENPF,RBMX,JUN,RBL1,HNRNPK,PCNA,RFC1,HELLS,RBBP8,CBX6,NRG1,TONSL,MXD3,BEND3,BAP1,BRCA1,SRSF10,NEDD4,SAMD1,RITA1,HNRNPC,TAF15,DPF3,UHRF1,E2F8	9606.ENSP00000221419,9606.ENSP00000222329,9606.ENSP00000231509,9606.ENSP00000239461,9606.ENSP00000248071,9606.ENSP00000254108,9606.ENSP00000260665,9606.ENSP00000263360,9606.ENSP00000274054,9606.ENSP00000278319,9606.ENSP00000278612,9606.ENSP00000283179,9606.ENSP00000287934,9606.ENSP00000290363,9606.ENSP00000296503,9606.ENSP00000296577,9606.ENSP00000300093,9606.ENSP00000301633,9606.ENSP00000308750,…
GO Process	GO:0010468	Regulation of gene expression	6.69e-05	143	4813	TARBP1,CDC6,AURKA,HNRNPL,ERF,FBXO5,NR3C1,FASTKD2,PRRX1,SNRPA,DLGAP5,YEATS4,KLF2,DHX29,FUS,SMARCC1,CCNB1,IRAK2,NAT10,CDK4,BRIP1,LRPPRC,EED,HNRNPH3,SLC2A4RG,CPSF6,NAF1,ZNF215,NPAT,ZFP36L2,RIOK2,HNRNPU,ATAD2,FZD1,EIF5B,CIART,HMGB2,TRA2A,RAD21,PLK1,CDT1,BIRC5,GTPBP2,CDCA7,CBX2,RNF26,KHDRBS1,NCL,BASP1,F2R,E2F7,CIRH1A,H1FX,SPIN4,PNRC2,MTDH,ZNF326,GTF2F2,HNRNPA1,LIN54,H1F0,PTGES2,HMGB1,E2F1,PRKAA1,HNRNP…	9606.ENSP00000040877,9606.ENSP00000209728,9606.ENSP00000216911,9606.ENSP00000221419,9606.ENSP00000222329,9606.ENSP00000229758,9606.ENSP00000231509,9606.ENSP00000236980,9606.ENSP00000239461,9606.ENSP00000243563,9606.ENSP00000247191,9606.ENSP00000247843,9606.ENSP00000248071,9606.ENSP00000251636,9606.ENSP00000254108,9606.ENSP00000254480,9606.ENSP00000256442,9606.ENSP00000256458,9606.ENSP00000257829,…
GO Process	GO:0032465	Regulation of cytokinesis	6.69e-05	12	89	CDC6,AURKA,CDC25B,PLK1,E2F7,KIF14,CIT,PRC1,KIF20A,PRPF40A,MYO19,E2F8	9606.ENSP00000209728,9606.ENSP00000216911,9606.ENSP00000245960,9606.ENSP00000300093,9606.ENSP00000323246,9606.ENSP00000356319,9606.ENSP00000376306,9606.ENSP00000377793,9606.ENSP00000378356,9606.ENSP00000386458,9606.ENSP00000479518,9606.ENSP00000481103
GO Process	GO:2000134	Negative regulation of g1/s transition of mitotic cell cycle	6.82e-05	13	107	AURKA,CCNB1,CDK4,BAX,CDC25C,E2F7,E2F1,RBL1,TFDP1,PCNA,CDKN2D,SLFN11,E2F8	9606.ENSP00000216911,9606.ENSP00000256442,9606.ENSP00000257904,9606.ENSP00000293288,9606.ENSP00000321656,9606.ENSP00000323246,9606.ENSP00000345571,9606.ENSP00000362768,9606.ENSP00000364519,9606.ENSP00000368458,9606.ENSP00000377224,9606.ENSP00000378067,9606.ENSP00000481103
GO Process	GO:0043933	Protein-containing complex subunit organization	7.48e-05	61	1539	ATP5D,MCM5,FBXO5,FASTKD2,DHX29,FUS,SMARCC1,NASP,CCNB1,DDB2,TGS1,MCM4,MCM6,MRPL3,MCM2,CENPE,CPSF6,SH3GL1,NAF1,FARSB,FZD1,HMGB2,ABCE1,CDT1,CHAF1A,MAT2A,MCM7,C10orf2,CHAF1B,SNRNP200,CUL1,H1FX,COL7A1,HOMER1,CENPQ,H1F0,CGI-74,PARP1,CENPF,EIF3A,NDUFAF4,BLOC1S2,RBMX,KIF2C,MRPS16,NDUFB6,MRPL19,HELLS,PSME4,NRG1,PILRB,CDC45,BEND3,SRSF10,PDGFC,CKAP5,NUP153,GTF2H3,NAP1L1,TUBGCP5,MCM3	9606.ENSP00000215375,9606.ENSP00000216122,9606.ENSP00000229758,9606.ENSP00000236980,9606.ENSP00000251636,9606.ENSP00000254108,9606.ENSP00000254480,9606.ENSP00000255120,9606.ENSP00000256442,9606.ENSP00000256996,9606.ENSP00000260129,9606.ENSP00000262105,9606.ENSP00000264156,9606.ENSP00000264995,9606.ENSP00000265056,9606.ENSP00000265148,9606.ENSP00000266679,9606.ENSP00000269886,9606.ENSP00000274054,…
GO Process	GO:0006364	rRNA processing	7.77e-05	18	212	FRG1,RRP9,NAT10,UTP20,NAF1,RIOK2,NOL6,WDR3,CIRH1A,TFB2M,RRP15,EXOSC9,RPP40,URB1,NOLC1,WDR74,NOL8,RRP12	9606.ENSP00000226798,9606.ENSP00000232888,9606.ENSP00000257829,9606.ENSP00000261637,9606.ENSP00000274054,9606.ENSP00000283109,9606.ENSP00000297990,9606.ENSP00000308179,9606.ENSP00000327179,9606.ENSP00000355471,9606.ENSP00000355899,9606.ENSP00000368984,9606.ENSP00000369391,9606.ENSP00000372199,9606.ENSP00000385410,9606.ENSP00000432119,9606.ENSP00000441140,9606.ENSP00000446184
GO Process	GO:0050684	Regulation of mrna processing	8.82e-05	15	149	HNRNPL,SNRPA,CCNB1,CPSF6,HNRNPU,TRA2A,KHDRBS1,NCL,HNRNPA1,HNRNPA2B1,PTBP1,RBMX,HNRNPK,SRSF10,SNRNP70	9606.ENSP00000221419,9606.ENSP00000243563,9606.ENSP00000256442,9606.ENSP00000266679,9606.ENSP00000283179,9606.ENSP00000297071,9606.ENSP00000313829,9606.ENSP00000318195,9606.ENSP00000341826,9606.ENSP00000346694,9606.ENSP00000349428,9606.ENSP00000359645,9606.ENSP00000365439,9606.ENSP00000420195,9606.ENSP00000472998
GO Process	GO:1903311	Regulation of mrna metabolic process	9.51e-05	23	338	HNRNPL,FASTKD2,SNRPA,FUS,CCNB1,CPSF6,ZFP36L2,HNRNPU,TRA2A,KHDRBS1,NCL,HNRNPA1,E2F1,HNRNPA2B1,PTBP1,RBMX,HNRNPK,EXOSC9,PSME4,SRSF10,HNRNPC,SNRNP70,TAF15	9606.ENSP00000221419,9606.ENSP00000236980,9606.ENSP00000243563,9606.ENSP00000254108,9606.ENSP00000256442,9606.ENSP00000266679,9606.ENSP00000282388,9606.ENSP00000283179,9606.ENSP00000297071,9606.ENSP00000313829,9606.ENSP00000318195,9606.ENSP00000341826,9606.ENSP00000345571,9606.ENSP00000346694,9606.ENSP00000349428,9606.ENSP00000359645,9606.ENSP00000365439,9606.ENSP00000368984,9606.ENSP00000384211,…
GO Process	GO:0061982	Meiosis i cell cycle process	0.00012	13	114	AURKA,FBXO5,MSH6,CDC25B,BRIP1,RAD21,PLK1,RMI1,RAD54L,PTTG1,TOP2A,CCNE2,MYBL1	9606.ENSP00000216911,9606.ENSP00000229758,9606.ENSP00000234420,9606.ENSP00000245960,9606.ENSP00000259008,9606.ENSP00000297338,9606.ENSP00000300093,9606.ENSP00000317039,9606.ENSP00000361043,9606.ENSP00000377536,9606.ENSP00000411532,9606.ENSP00000429089,9606.ENSP00000429633
GO Process	GO:1901362	Organic cyclic compound biosynthetic process	0.00012	51	1211	ATP5D,POLE2,PYCRL,NR3C1,UNG,CCNB1,CDK4,RSAD1,POLD3,PPAT,DCK,BAX,C10orf2,IMPDH2,DCTPP1,WDR33,CSTF2T,GTF2F2,E2F1,PRKAA1,POLR3H,PRIM1,E2F2,TFB2M,PARP1,CENPF,DTL,INTS7,UCK2,AMD1,RBMX,JUN,TFDP1,PCNA,RFC3,MTAP,GART,RFC1,RFC4,OSBPL6,CDKN2D,PTTG1,PRPS2,POLR3G,POLD1,SLBP,GMPS,GTF2H3,POLRMT,TAF15,PRIM2	9606.ENSP00000215375,9606.ENSP00000216367,9606.ENSP00000220966,9606.ENSP00000231509,9606.ENSP00000242576,9606.ENSP00000256442,9606.ENSP00000257904,9606.ENSP00000258955,9606.ENSP00000263681,9606.ENSP00000264220,9606.ENSP00000286648,9606.ENSP00000293288,9606.ENSP00000309595,9606.ENSP00000321584,9606.ENSP00000322524,9606.ENSP00000325377,9606.ENSP00000332444,9606.ENSP00000340823,9606.ENSP00000345571,…
GO Process	GO:2000278	Regulation of dna biosynthetic process	0.00012	13	114	NAT10,NAF1,HNRNPU,DSCC1,PIF1,HNRNPA1,HNRNPA2B1,NEK2,TFDP1,PCNA,RFC3,RFC4,HNRNPC	9606.ENSP00000257829,9606.ENSP00000274054,9606.ENSP00000283179,9606.ENSP00000322180,9606.ENSP00000328174,9606.ENSP00000341826,9606.ENSP00000346694,9606.ENSP00000355966,9606.ENSP00000364519,9606.ENSP00000368458,9606.ENSP00000369411,9606.ENSP00000376272,9606.ENSP00000451291
GO Process	GO:0051640	Organelle localization	0.00013	32	598	AURKA,CAV2,DLGAP5,CCNB1,LRPPRC,CENPE,NUF2,CEP164,HAUS1,BBS5,ABCE1,PLK1,CDT1,BIRC5,STK25,COL7A1,CENPQ,TMEM201,PCNT,CHAMP1,CENPF,NEK2,KIF14,ASPM,PSRC1,BLOC1S2,KIF2C,CNTRL,SCFD2,ODF2,CKAP5,MYO19	9606.ENSP00000216911,9606.ENSP00000222693,9606.ENSP00000247191,9606.ENSP00000256442,9606.ENSP00000260665,9606.ENSP00000265148,9606.ENSP00000271452,9606.ENSP00000278935,9606.ENSP00000282058,9606.ENSP00000295240,9606.ENSP00000296577,9606.ENSP00000300093,9606.ENSP00000301019,9606.ENSP00000301633,9606.ENSP00000325748,9606.ENSP00000332371,9606.ENSP00000337289,9606.ENSP00000344503,9606.ENSP00000352572,…
GO Process	GO:0000079	Regulation of cyclin-dependent protein serine/threonine kinase activity	0.00014	12	97	CDC6,CCNB1,CDK4,CCNB2,PLK1,CDC25A,CDC25C,CDKN3,PSRC1,CDKN2D,CCNF,CCNE2	9606.ENSP00000209728,9606.ENSP00000256442,9606.ENSP00000257904,9606.ENSP00000288207,9606.ENSP00000300093,9606.ENSP00000303706,9606.ENSP00000321656,9606.ENSP00000335357,9606.ENSP00000358925,9606.ENSP00000377224,9606.ENSP00000380256,9606.ENSP00000429089
GO Process	GO:0002562	Somatic diversification of immune receptors via germline recombination within a single locus	0.00014	8	35	MSH2,MSH6,UNG,NBN,HMGB2,ATAD5,HMGB1,EXO1	9606.ENSP00000233146,9606.ENSP00000234420,9606.ENSP00000242576,9606.ENSP00000265433,9606.ENSP00000296503,9606.ENSP00000313171,9606.ENSP00000345347,9606.ENSP00000355506
GO Process	GO:0006950	Response to stress	0.00014	110	3485	MCM5,POLE2,AURKA,HNRNPL,MSH2,MSH6,UNG,KLF2,GINS2,CCNB1,IRAK2,DDB2,CDK4,BRIP1,RNF138,TIPIN,MCM4,POLD3,WDR76,MCM6,RAD18,MCM2,NBN,MMS22L,CEP164,ZFP36L2,BAX,HMGB2,ABCE1,RAD21,PLK1,CHAF1A,FEN1,ESCO2,MCM7,RMI2,CLSPN,ATAD5,CHAF1B,TLK2,RMI1,F2R,CDC25C,DCTPP1,E2F7,WDR33,STK25,PMAIP1,CUL1,PIF1,NDNL2,C17orf70,HNRNPA1,HMGB1,E2F1,PRKAA1,NET1,POLR3H,DNA2,MAP3K5,XRCC2,EIF2B3,WDHD1,FAN1,EXO1,PARP1,DTL,INTS7,ATP1…	9606.ENSP00000216122,9606.ENSP00000216367,9606.ENSP00000216911,9606.ENSP00000221419,9606.ENSP00000233146,9606.ENSP00000234420,9606.ENSP00000242576,9606.ENSP00000248071,9606.ENSP00000253462,9606.ENSP00000256442,9606.ENSP00000256458,9606.ENSP00000256996,9606.ENSP00000257904,9606.ENSP00000259008,9606.ENSP00000261593,9606.ENSP00000261881,9606.ENSP00000262105,9606.ENSP00000263681,9606.ENSP00000263795,…
GO Process	GO:0051128	Regulation of cellular component organization	0.00014	83	2402	CDC6,AURKA,CAV2,FBXO5,PRRX1,DLGAP5,CCNB1,DDB2,NAT10,MESDC2,EED,MCM2,CENPE,NBN,SH3GL1,NAF1,RIOK2,HNRNPU,ATAD2,FZD1,BAX,RAD21,PLK1,CDT1,BIRC5,BUB1,FEN1,ARL6IP1,RMI2,TLK2,CDC25C,MMP1,STK25,PMAIP1,PIF1,H1FX,HOMER1,ZFYVE16,HNRNPA1,H1F0,HMGB1,E2F1,SVIP,PRKAA1,HNRNPA2B1,NET1,IQGAP3,PARP1,CENPF,NEK2,KIF14,NES,MLLT11,PSRC1,CNTRL,TFDP1,HNRNPK,SEPT8,EXOSC9,CNTROB,SDC1,FSCN1,CDKN2D,PTTG1,SIPA1,CCNF,PAXIP1,NR…	9606.ENSP00000209728,9606.ENSP00000216911,9606.ENSP00000222693,9606.ENSP00000229758,9606.ENSP00000239461,9606.ENSP00000247191,9606.ENSP00000256442,9606.ENSP00000256996,9606.ENSP00000257829,9606.ENSP00000261758,9606.ENSP00000263360,9606.ENSP00000265056,9606.ENSP00000265148,9606.ENSP00000265433,9606.ENSP00000269886,9606.ENSP00000274054,9606.ENSP00000283109,9606.ENSP00000283179,9606.ENSP00000287394,…
GO Process	GO:0006355	Regulation of transcription, dna-templated	0.0002	107	3388	TARBP1,CDC6,ERF,FBXO5,NR3C1,PRRX1,DLGAP5,YEATS4,KLF2,FUS,SMARCC1,IRAK2,BRIP1,EED,SLC2A4RG,ZNF215,NPAT,ZFP36L2,HNRNPU,ATAD2,FZD1,CIART,HMGB2,RAD21,PLK1,CDT1,BIRC5,CDCA7,CBX2,KHDRBS1,NCL,BASP1,F2R,E2F7,CIRH1A,H1FX,SPIN4,MTDH,ZNF326,GTF2F2,LIN54,H1F0,PTGES2,HMGB1,E2F1,PRKAA1,HNRNPA2B1,MAP3K5,DLX1,E2F2,TFB2M,IRF2BP2,PARP1,CENPF,MLLT11,PSRC1,BLOC1S2,RBMX,JUN,ORC1,RBL1,ZNF367,TFDP1,TCF19,HNRNPK,PCNA,EX…	9606.ENSP00000040877,9606.ENSP00000209728,9606.ENSP00000222329,9606.ENSP00000229758,9606.ENSP00000231509,9606.ENSP00000239461,9606.ENSP00000247191,9606.ENSP00000247843,9606.ENSP00000248071,9606.ENSP00000254108,9606.ENSP00000254480,9606.ENSP00000256458,9606.ENSP00000259008,9606.ENSP00000263360,9606.ENSP00000266077,9606.ENSP00000278319,9606.ENSP00000278612,9606.ENSP00000282388,9606.ENSP00000283179,…
GO Process	GO:0032204	Regulation of telomere maintenance	0.0002	11	83	NAT10,NBN,NAF1,HNRNPU,PIF1,HNRNPA1,HNRNPA2B1,PARP1,NEK2,GNL3,HNRNPC	9606.ENSP00000257829,9606.ENSP00000265433,9606.ENSP00000274054,9606.ENSP00000283179,9606.ENSP00000328174,9606.ENSP00000341826,9606.ENSP00000346694,9606.ENSP00000355759,9606.ENSP00000355966,9606.ENSP00000395772,9606.ENSP00000451291
GO Process	GO:0009893	Positive regulation of metabolic process	0.00021	119	3893	CAMKK1,CDC6,AURKA,HNRNPL,CAV2,KITLG,NR3C1,MSH2,FASTKD2,PRRX1,CDC25B,DLGAP5,YEATS4,KLF2,DHX29,FUS,SMARCC1,CCNB1,IRAK2,NAT10,CDK4,EED,CENPE,NBN,TRIM65,NAF1,NPAT,ZFP36L2,RIOK2,HNRNPU,ATAD2,FZD1,BAX,HMGB2,TRA2A,PLK1,CDT1,CLSPN,ATAD5,KHDRBS1,NCL,F2R,DSCC1,E2F7,DBF4B,STK25,PMAIP1,H1FX,NDNL2,MTDH,GTF2F2,HNRNPA1,H1F0,PTGES2,HMGB1,E2F1,SVIP,PRKAA1,HNRNPA2B1,POLR3H,PTBP1,DNA2,PASK,MAP3K5,IQGAP3,DLX1,E2F2,T…	9606.ENSP00000158166,9606.ENSP00000209728,9606.ENSP00000216911,9606.ENSP00000221419,9606.ENSP00000222693,9606.ENSP00000228280,9606.ENSP00000231509,9606.ENSP00000233146,9606.ENSP00000236980,9606.ENSP00000239461,9606.ENSP00000245960,9606.ENSP00000247191,9606.ENSP00000247843,9606.ENSP00000248071,9606.ENSP00000251636,9606.ENSP00000254108,9606.ENSP00000254480,9606.ENSP00000256442,9606.ENSP00000256458,…
GO Process	GO:0051172	Negative regulation of nitrogen compound metabolic process	0.00021	83	2429	HNRNPL,ERF,FBXO5,NR3C1,MSH2,MSH6,PRRX1,KLF2,FUS,SMARCC1,CCNB1,NAT10,LRPPRC,EED,NBN,NAF1,ZNF215,NPAT,ZFP36L2,HNRNPU,FZD1,CIART,BAX,HMGB2,ABCE1,PLK1,BIRC5,ARL6IP1,CBX2,RMI2,KHDRBS1,TLK2,NCL,BASP1,E2F7,PIF1,MINA,H1FX,COL7A1,MTDH,HNRNPA1,H1F0,HMGB1,E2F1,SVIP,PRKAA1,HNRNPA2B1,PUS7,PTBP1,DLX1,E2F2,SH3BP5L,IRF2BP2,PARP1,CENPF,EIF3A,RBMX,JUN,RBL1,HNRNPK,PCNA,RFC1,CDKN2D,PTTG1,HELLS,RBBP8,CBX6,NRG1,TONSL,…	9606.ENSP00000221419,9606.ENSP00000222329,9606.ENSP00000229758,9606.ENSP00000231509,9606.ENSP00000233146,9606.ENSP00000234420,9606.ENSP00000239461,9606.ENSP00000248071,9606.ENSP00000254108,9606.ENSP00000254480,9606.ENSP00000256442,9606.ENSP00000257829,9606.ENSP00000260665,9606.ENSP00000263360,9606.ENSP00000265433,9606.ENSP00000274054,9606.ENSP00000278319,9606.ENSP00000278612,9606.ENSP00000282388,…
GO Process	GO:0031324	Negative regulation of cellular metabolic process	0.00023	88	2630	CDC6,HNRNPL,ERF,FBXO5,NR3C1,MSH2,MSH6,PRRX1,KLF2,FUS,SMARCC1,CCNB1,NAT10,LRPPRC,TIPIN,EED,NBN,NAF1,ZNF215,NPAT,ZFP36L2,HNRNPU,FZD1,CIART,BAX,HMGB2,ABCE1,PLK1,BIRC5,ARL6IP1,CBX2,RMI2,KHDRBS1,TLK2,NCL,BASP1,E2F7,PIF1,MINA,H1FX,COL7A1,MTDH,HNRNPA1,H1F0,HMGB1,E2F1,SVIP,PRKAA1,HNRNPA2B1,PUS7,PTBP1,PASK,DLX1,E2F2,SH3BP5L,IRF2BP2,PARP1,CENPF,EIF3A,RBMX,JUN,RBL1,HNRNPK,PCNA,RFC1,CDKN2D,PTTG1,HELLS,SLFN11…	9606.ENSP00000209728,9606.ENSP00000221419,9606.ENSP00000222329,9606.ENSP00000229758,9606.ENSP00000231509,9606.ENSP00000233146,9606.ENSP00000234420,9606.ENSP00000239461,9606.ENSP00000248071,9606.ENSP00000254108,9606.ENSP00000254480,9606.ENSP00000256442,9606.ENSP00000257829,9606.ENSP00000260665,9606.ENSP00000261881,9606.ENSP00000263360,9606.ENSP00000265433,9606.ENSP00000274054,9606.ENSP00000278319,…
GO Process	GO:0010605	Negative regulation of macromolecule metabolic process	0.00024	94	2875	CDC6,AURKA,HNRNPL,ERF,FBXO5,NR3C1,MSH2,MSH6,PRRX1,KLF2,FUS,SMARCC1,CCNB1,NAT10,BRIP1,LRPPRC,TIPIN,EED,NBN,NAF1,ZNF215,NPAT,ZFP36L2,HNRNPU,FZD1,CIART,BAX,HMGB2,ABCE1,PLK1,BIRC5,GTPBP2,ARL6IP1,CBX2,RMI2,KHDRBS1,TLK2,NCL,BASP1,E2F7,PIF1,MINA,H1FX,COL7A1,PNRC2,MTDH,HNRNPA1,H1F0,HMGB1,E2F1,SVIP,PRKAA1,HNRNPA2B1,PUS7,PTBP1,PASK,IQGAP3,DLX1,E2F2,SH3BP5L,IRF2BP2,PARP1,CENPF,EIF3A,RBMX,JUN,RBL1,HNRNPK,PCN…	9606.ENSP00000209728,9606.ENSP00000216911,9606.ENSP00000221419,9606.ENSP00000222329,9606.ENSP00000229758,9606.ENSP00000231509,9606.ENSP00000233146,9606.ENSP00000234420,9606.ENSP00000239461,9606.ENSP00000248071,9606.ENSP00000254108,9606.ENSP00000254480,9606.ENSP00000256442,9606.ENSP00000257829,9606.ENSP00000259008,9606.ENSP00000260665,9606.ENSP00000261881,9606.ENSP00000263360,9606.ENSP00000265433,…
GO Process	GO:1903312	Negative regulation of mrna metabolic process	0.00024	11	85	HNRNPL,FUS,HNRNPU,E2F1,HNRNPA2B1,PTBP1,RBMX,HNRNPK,SRSF10,HNRNPC,TAF15	9606.ENSP00000221419,9606.ENSP00000254108,9606.ENSP00000283179,9606.ENSP00000345571,9606.ENSP00000346694,9606.ENSP00000349428,9606.ENSP00000359645,9606.ENSP00000365439,9606.ENSP00000420195,9606.ENSP00000451291,9606.ENSP00000474096
GO Process	GO:0010558	Negative regulation of macromolecule biosynthetic process	0.00025	59	1534	CDC6,ERF,FBXO5,NR3C1,PRRX1,KLF2,NAT10,TIPIN,EED,ZNF215,NPAT,ZFP36L2,HNRNPU,FZD1,CIART,HMGB2,PLK1,BIRC5,CBX2,KHDRBS1,NCL,BASP1,E2F7,PIF1,MINA,MTDH,HNRNPA1,H1F0,HMGB1,E2F1,HNRNPA2B1,PUS7,PASK,DLX1,E2F2,IRF2BP2,PARP1,CENPF,JUN,RBL1,PCNA,RFC1,HELLS,SLFN11,RBBP8,CBX6,NRG1,TONSL,MXD3,BEND3,BAP1,BRCA1,NEDD4,SAMD1,RITA1,HNRNPC,DPF3,UHRF1,E2F8	9606.ENSP00000209728,9606.ENSP00000222329,9606.ENSP00000229758,9606.ENSP00000231509,9606.ENSP00000239461,9606.ENSP00000248071,9606.ENSP00000257829,9606.ENSP00000261881,9606.ENSP00000263360,9606.ENSP00000278319,9606.ENSP00000278612,9606.ENSP00000282388,9606.ENSP00000283179,9606.ENSP00000287934,9606.ENSP00000290363,9606.ENSP00000296503,9606.ENSP00000300093,9606.ENSP00000301633,9606.ENSP00000308750,…
GO Process	GO:1903506	Regulation of nucleic acid-templated transcription	0.00025	108	3447	TARBP1,CDC6,ERF,FBXO5,NR3C1,PRRX1,DLGAP5,YEATS4,KLF2,FUS,SMARCC1,IRAK2,BRIP1,EED,SLC2A4RG,ZNF215,NPAT,ZFP36L2,HNRNPU,ATAD2,FZD1,CIART,HMGB2,RAD21,PLK1,CDT1,BIRC5,CDCA7,CBX2,KHDRBS1,NCL,BASP1,F2R,E2F7,CIRH1A,MINA,H1FX,SPIN4,MTDH,ZNF326,GTF2F2,LIN54,H1F0,PTGES2,HMGB1,E2F1,PRKAA1,HNRNPA2B1,MAP3K5,DLX1,E2F2,TFB2M,IRF2BP2,PARP1,CENPF,MLLT11,PSRC1,BLOC1S2,RBMX,JUN,ORC1,RBL1,ZNF367,TFDP1,TCF19,HNRNPK,PC…	9606.ENSP00000040877,9606.ENSP00000209728,9606.ENSP00000222329,9606.ENSP00000229758,9606.ENSP00000231509,9606.ENSP00000239461,9606.ENSP00000247191,9606.ENSP00000247843,9606.ENSP00000248071,9606.ENSP00000254108,9606.ENSP00000254480,9606.ENSP00000256458,9606.ENSP00000259008,9606.ENSP00000263360,9606.ENSP00000266077,9606.ENSP00000278319,9606.ENSP00000278612,9606.ENSP00000282388,9606.ENSP00000283179,…
GO Process	GO:2000816	Negative regulation of mitotic sister chromatid separation	0.00027	7	27	FBXO5,RAD21,PLK1,BIRC5,BUB1,CENPF,PTTG1	9606.ENSP00000229758,9606.ENSP00000297338,9606.ENSP00000300093,9606.ENSP00000301633,9606.ENSP00000302530,9606.ENSP00000355922,9606.ENSP00000377536
GO Process	GO:0000731	DNA synthesis involved in DNA repair	0.00029	9	54	POLE2,POLD3,DTL,PCNA,RFC3,RFC1,RFC4,CDKN2D,POLD1	9606.ENSP00000216367,9606.ENSP00000263681,9606.ENSP00000355958,9606.ENSP00000368458,9606.ENSP00000369411,9606.ENSP00000371321,9606.ENSP00000376272,9606.ENSP00000377224,9606.ENSP00000406046
GO Process	GO:0045740	Positive regulation of dna replication	0.0003	8	40	CDT1,ATAD5,E2F7,DBF4B,DNA2,JUN,PCNA,E2F8	9606.ENSP00000301019,9606.ENSP00000313171,9606.ENSP00000323246,9606.ENSP00000323663,9606.ENSP00000351185,9606.ENSP00000360266,9606.ENSP00000368458,9606.ENSP00000481103
GO Process	GO:0045839	Negative regulation of mitotic nuclear division	0.0003	8	40	FBXO5,RAD21,PLK1,BIRC5,BUB1,CENPF,PTTG1,CHEK1	9606.ENSP00000229758,9606.ENSP00000297338,9606.ENSP00000300093,9606.ENSP00000301633,9606.ENSP00000302530,9606.ENSP00000355922,9606.ENSP00000377536,9606.ENSP00000388648
GO Process	GO:0065003	Protein-containing complex assembly	0.0003	52	1293	ATP5D,MCM5,FBXO5,FASTKD2,DHX29,FUS,NASP,CCNB1,DDB2,TGS1,MCM4,MCM6,MCM2,CENPE,CPSF6,NAF1,FARSB,HMGB2,CDT1,CHAF1A,MAT2A,MCM7,C10orf2,CHAF1B,SNRNP200,CUL1,H1FX,COL7A1,HOMER1,CENPQ,H1F0,CGI-74,PARP1,CENPF,EIF3A,NDUFAF4,BLOC1S2,RBMX,NDUFB6,HELLS,NRG1,PILRB,CDC45,BEND3,SRSF10,PDGFC,CKAP5,NUP153,GTF2H3,NAP1L1,TUBGCP5,MCM3	9606.ENSP00000215375,9606.ENSP00000216122,9606.ENSP00000229758,9606.ENSP00000236980,9606.ENSP00000251636,9606.ENSP00000254108,9606.ENSP00000255120,9606.ENSP00000256442,9606.ENSP00000256996,9606.ENSP00000260129,9606.ENSP00000262105,9606.ENSP00000264156,9606.ENSP00000265056,9606.ENSP00000265148,9606.ENSP00000266679,9606.ENSP00000274054,9606.ENSP00000281828,9606.ENSP00000296503,9606.ENSP00000301019,…
GO Process	GO:0045005	DNA-dependent DNA replication maintenance of fidelity	0.00034	8	41	TIPIN,MMS22L,DNA2,PCNA,SLFN11,TONSL,POLD1,DDX11	9606.ENSP00000261881,9606.ENSP00000275053,9606.ENSP00000351185,9606.ENSP00000368458,9606.ENSP00000378067,9606.ENSP00000386239,9606.ENSP00000406046,9606.ENSP00000440402
GO Process	GO:0031327	Negative regulation of cellular biosynthetic process	0.00037	60	1592	CDC6,ERF,FBXO5,NR3C1,PRRX1,KLF2,NAT10,TIPIN,EED,ZNF215,NPAT,ZFP36L2,HNRNPU,FZD1,CIART,HMGB2,PLK1,BIRC5,CBX2,KHDRBS1,NCL,BASP1,E2F7,PIF1,MINA,MTDH,HNRNPA1,H1F0,HMGB1,E2F1,PRKAA1,HNRNPA2B1,PUS7,PASK,DLX1,E2F2,IRF2BP2,PARP1,CENPF,JUN,RBL1,PCNA,RFC1,HELLS,SLFN11,RBBP8,CBX6,NRG1,TONSL,MXD3,BEND3,BAP1,BRCA1,NEDD4,SAMD1,RITA1,HNRNPC,DPF3,UHRF1,E2F8	9606.ENSP00000209728,9606.ENSP00000222329,9606.ENSP00000229758,9606.ENSP00000231509,9606.ENSP00000239461,9606.ENSP00000248071,9606.ENSP00000257829,9606.ENSP00000261881,9606.ENSP00000263360,9606.ENSP00000278319,9606.ENSP00000278612,9606.ENSP00000282388,9606.ENSP00000283179,9606.ENSP00000287934,9606.ENSP00000290363,9606.ENSP00000296503,9606.ENSP00000300093,9606.ENSP00000301633,9606.ENSP00000308750,…
GO Process	GO:0019985	Translesion synthesis	0.00039	8	42	POLE2,POLD3,DTL,PCNA,RFC3,RFC1,RFC4,POLD1	9606.ENSP00000216367,9606.ENSP00000263681,9606.ENSP00000355958,9606.ENSP00000368458,9606.ENSP00000369411,9606.ENSP00000371321,9606.ENSP00000376272,9606.ENSP00000406046
GO Process	GO:0044271	Cellular nitrogen compound biosynthetic process	0.00039	58	1522	ATP5D,POLE2,NR3C1,UNG,DHX29,CCNB1,CDK4,RSAD1,POLD3,PPAT,MRPL3,FARSB,DCK,EIF5B,BAX,ABCE1,GTPBP2,C10orf2,IMPDH2,DCTPP1,WDR33,CSTF2T,GTF2F2,E2F1,POLR3H,PRIM1,EIF2B3,E2F2,TFB2M,PARP1,CENPF,DTL,INTS7,UCK2,AMD1,EIF3A,RBMX,JUN,MRPS16,TFDP1,PCNA,RFC3,MTAP,GART,RFC1,RFC4,CDKN2D,MRPL19,PTTG1,PRPS2,POLR3G,POLD1,SLBP,GMPS,GTF2H3,POLRMT,TAF15,PRIM2	9606.ENSP00000215375,9606.ENSP00000216367,9606.ENSP00000231509,9606.ENSP00000242576,9606.ENSP00000251636,9606.ENSP00000256442,9606.ENSP00000257904,9606.ENSP00000258955,9606.ENSP00000263681,9606.ENSP00000264220,9606.ENSP00000264995,9606.ENSP00000281828,9606.ENSP00000286648,9606.ENSP00000289371,9606.ENSP00000293288,9606.ENSP00000296577,9606.ENSP00000303997,9606.ENSP00000309595,9606.ENSP00000321584,…
GO Process	GO:0022607	Cellular component assembly	0.00041	80	2359	ATP5D,MCM5,AURKA,CAV2,FBXO5,FASTKD2,DHX29,FUS,NASP,CCNB1,DDB2,BRIP1,TGS1,MPP5,MCM4,MCM6,MCM2,CENPE,NBN,CPSF6,CDH11,NAF1,CEP164,FARSB,HAUS1,FZD1,BBS5,HMGB2,PLK1,CDT1,CHAF1A,BIRC5,MAT2A,ARL6IP1,MCM7,C10orf2,CHAF1B,SNRNP200,STK25,CUL1,H1FX,COL7A1,HOMER1,CDKN3,CENPQ,MTDH,H1F0,CGI-74,DNA2,PCNT,EXO1,PARP1,CENPF,NEK2,ASPM,EIF3A,NDUFAF4,BLOC1S2,RBMX,CNTRL,SHROOM1,NDUFB6,CNTROB,FSCN1,HELLS,PRC1,NRG1,PILRB…	9606.ENSP00000215375,9606.ENSP00000216122,9606.ENSP00000216911,9606.ENSP00000222693,9606.ENSP00000229758,9606.ENSP00000236980,9606.ENSP00000251636,9606.ENSP00000254108,9606.ENSP00000255120,9606.ENSP00000256442,9606.ENSP00000256996,9606.ENSP00000259008,9606.ENSP00000260129,9606.ENSP00000261681,9606.ENSP00000262105,9606.ENSP00000264156,9606.ENSP00000265056,9606.ENSP00000265148,9606.ENSP00000265433,…
GO Process	GO:0048024	Regulation of mrna splicing, via spliceosome	0.00041	12	110	HNRNPL,HNRNPU,TRA2A,KHDRBS1,NCL,HNRNPA1,HNRNPA2B1,PTBP1,RBMX,HNRNPK,SRSF10,SNRNP70	9606.ENSP00000221419,9606.ENSP00000283179,9606.ENSP00000297071,9606.ENSP00000313829,9606.ENSP00000318195,9606.ENSP00000341826,9606.ENSP00000346694,9606.ENSP00000349428,9606.ENSP00000359645,9606.ENSP00000365439,9606.ENSP00000420195,9606.ENSP00000472998
GO Process	GO:0051302	Regulation of cell division	0.00043	16	197	CDC6,AURKA,CDC25B,DLGAP5,PLK1,E2F7,KIF14,ASPM,RBL1,CIT,PRC1,KIF20A,PRPF40A,PDGFC,MYO19,E2F8	9606.ENSP00000209728,9606.ENSP00000216911,9606.ENSP00000245960,9606.ENSP00000247191,9606.ENSP00000300093,9606.ENSP00000323246,9606.ENSP00000356319,9606.ENSP00000356379,9606.ENSP00000362768,9606.ENSP00000376306,9606.ENSP00000377793,9606.ENSP00000378356,9606.ENSP00000386458,9606.ENSP00000422464,9606.ENSP00000479518,9606.ENSP00000481103
GO Process	GO:0006289	Nucleotide-excision repair	0.00044	12	111	DDB2,BRIP1,POLD3,FAN1,PARP1,PCNA,RFC3,HMGN1,RFC1,RFC4,POLD1,GTF2H3	9606.ENSP00000256996,9606.ENSP00000259008,9606.ENSP00000263681,9606.ENSP00000354497,9606.ENSP00000355759,9606.ENSP00000368458,9606.ENSP00000369411,9606.ENSP00000370125,9606.ENSP00000371321,9606.ENSP00000376272,9606.ENSP00000406046,9606.ENSP00000445162
GO Process	GO:0051338	Regulation of transferase activity	0.00045	44	1036	CAMKK1,CDC6,KITLG,FBXO5,CDC25B,CCNB1,IRAK2,CDK4,CENPE,NBN,NAF1,HNRNPU,CCNB2,PLK1,CDC25A,CLSPN,F2R,CDC25C,DSCC1,DBF4B,STK25,PIF1,CDKN3,PRKAA1,HNRNPA2B1,MAP3K5,IQGAP3,SH3BP5L,NEK2,KIF14,PSRC1,RBL1,PCNA,RFC3,HMGN1,RFC4,CDKN2D,CCNF,NRG1,PILRB,CDK12,PDGFC,CCNE2,BORA	9606.ENSP00000158166,9606.ENSP00000209728,9606.ENSP00000228280,9606.ENSP00000229758,9606.ENSP00000245960,9606.ENSP00000256442,9606.ENSP00000256458,9606.ENSP00000257904,9606.ENSP00000265148,9606.ENSP00000265433,9606.ENSP00000274054,9606.ENSP00000283179,9606.ENSP00000288207,9606.ENSP00000300093,9606.ENSP00000303706,9606.ENSP00000312995,9606.ENSP00000321326,9606.ENSP00000321656,9606.ENSP00000322180,…
GO Process	GO:0007127	Meiosis i	0.00047	12	112	AURKA,FBXO5,CDC25B,BRIP1,RAD21,PLK1,RMI1,RAD54L,PTTG1,TOP2A,CCNE2,MYBL1	9606.ENSP00000216911,9606.ENSP00000229758,9606.ENSP00000245960,9606.ENSP00000259008,9606.ENSP00000297338,9606.ENSP00000300093,9606.ENSP00000317039,9606.ENSP00000361043,9606.ENSP00000377536,9606.ENSP00000411532,9606.ENSP00000429089,9606.ENSP00000429633
GO Process	GO:0006977	DNA damage response, signal transduction by p53 class mediator resulting in cell cycle arrest	0.0005	9	59	AURKA,CCNB1,BAX,CDC25C,E2F7,E2F1,TFDP1,PCNA,E2F8	9606.ENSP00000216911,9606.ENSP00000256442,9606.ENSP00000293288,9606.ENSP00000321656,9606.ENSP00000323246,9606.ENSP00000345571,9606.ENSP00000364519,9606.ENSP00000368458,9606.ENSP00000481103
GO Process	GO:0007080	Mitotic metaphase plate congression	0.00051	8	44	CCNB1,CENPE,NUF2,CDT1,CHAMP1,KIF14,PSRC1,KIF2C	9606.ENSP00000256442,9606.ENSP00000265148,9606.ENSP00000271452,9606.ENSP00000301019,9606.ENSP00000354730,9606.ENSP00000356319,9606.ENSP00000358925,9606.ENSP00000361298
GO Process	GO:0034470	ncRNA processing	0.00051	23	381	TARBP1,FRG1,RRP9,NAT10,UTP20,NAF1,RIOK2,TSEN2,NOL6,WDR3,CIRH1A,HNRNPA2B1,PUS7,TFB2M,RRP15,INTS7,EXOSC9,RPP40,URB1,NOLC1,WDR74,NOL8,RRP12	9606.ENSP00000040877,9606.ENSP00000226798,9606.ENSP00000232888,9606.ENSP00000257829,9606.ENSP00000261637,9606.ENSP00000274054,9606.ENSP00000283109,9606.ENSP00000284995,9606.ENSP00000297990,9606.ENSP00000308179,9606.ENSP00000327179,9606.ENSP00000346694,9606.ENSP00000348722,9606.ENSP00000355471,9606.ENSP00000355899,9606.ENSP00000355961,9606.ENSP00000368984,9606.ENSP00000369391,9606.ENSP00000372199,…
GO Process	GO:0034660	ncRNA metabolic process	0.00051	26	467	TARBP1,FRG1,RRP9,NAT10,UTP20,NAF1,FARSB,RIOK2,TSEN2,NOL6,WDR3,CIRH1A,HNRNPA2B1,PUS7,TFB2M,RRP15,INTS7,EXOSC9,RPP40,URB1,SLFN11,NOLC1,MYBL1,WDR74,NOL8,RRP12	9606.ENSP00000040877,9606.ENSP00000226798,9606.ENSP00000232888,9606.ENSP00000257829,9606.ENSP00000261637,9606.ENSP00000274054,9606.ENSP00000281828,9606.ENSP00000283109,9606.ENSP00000284995,9606.ENSP00000297990,9606.ENSP00000308179,9606.ENSP00000327179,9606.ENSP00000346694,9606.ENSP00000348722,9606.ENSP00000355471,9606.ENSP00000355899,9606.ENSP00000355961,9606.ENSP00000368984,9606.ENSP00000369391,…
GO Process	GO:0045190	Isotype switching	0.00059	6	20	MSH2,MSH6,UNG,NBN,ATAD5,EXO1	9606.ENSP00000233146,9606.ENSP00000234420,9606.ENSP00000242576,9606.ENSP00000265433,9606.ENSP00000313171,9606.ENSP00000355506
GO Process	GO:0051315	Attachment of mitotic spindle microtubules to kinetochore	0.00064	5	11	CENPE,NUF2,CDT1,CHAMP1,KIF2C	9606.ENSP00000265148,9606.ENSP00000271452,9606.ENSP00000301019,9606.ENSP00000354730,9606.ENSP00000361298
GO Process	GO:0010638	Positive regulation of organelle organization	0.00077	31	633	AURKA,DLGAP5,CCNB1,EED,NBN,NAF1,HNRNPU,BAX,RAD21,CDT1,BIRC5,FEN1,PMAIP1,HNRNPA1,E2F1,PRKAA1,HNRNPA2B1,NEK2,NES,MLLT11,PSRC1,TFDP1,SDC1,FSCN1,PAXIP1,GNL3,BAP1,BRCA1,CKAP5,DDX11,PHF19	9606.ENSP00000216911,9606.ENSP00000247191,9606.ENSP00000256442,9606.ENSP00000263360,9606.ENSP00000265433,9606.ENSP00000274054,9606.ENSP00000283179,9606.ENSP00000293288,9606.ENSP00000297338,9606.ENSP00000301019,9606.ENSP00000301633,9606.ENSP00000305480,9606.ENSP00000326119,9606.ENSP00000341826,9606.ENSP00000345571,9606.ENSP00000346148,9606.ENSP00000346694,9606.ENSP00000355966,9606.ENSP00000357206,…
GO Process	GO:0007098	Centrosome cycle	0.00081	10	81	AURKA,HAUS1,PLK1,XRCC2,NEK2,CNTROB,ODF2,BRCA1,CKAP5,SLC16A1	9606.ENSP00000216911,9606.ENSP00000282058,9606.ENSP00000300093,9606.ENSP00000352271,9606.ENSP00000355966,9606.ENSP00000369614,9606.ENSP00000403453,9606.ENSP00000418960,9606.ENSP00000432768,9606.ENSP00000441065
GO Process	GO:0010639	Negative regulation of organelle organization	0.00081	23	395	FBXO5,NAT10,MCM2,NBN,HNRNPU,ATAD2,RAD21,PLK1,BIRC5,BUB1,PIF1,H1FX,HNRNPA1,H1F0,PARP1,CENPF,NEK2,PTTG1,CCNF,CHEK1,TOP2A,BRCA1,HNRNPC	9606.ENSP00000229758,9606.ENSP00000257829,9606.ENSP00000265056,9606.ENSP00000265433,9606.ENSP00000283179,9606.ENSP00000287394,9606.ENSP00000297338,9606.ENSP00000300093,9606.ENSP00000301633,9606.ENSP00000302530,9606.ENSP00000328174,9606.ENSP00000329662,9606.ENSP00000341826,9606.ENSP00000344504,9606.ENSP00000355759,9606.ENSP00000355922,9606.ENSP00000355966,9606.ENSP00000377536,9606.ENSP00000380256,…
GO Process	GO:0010608	Posttranscriptional regulation of gene expression	0.00083	29	574	HNRNPL,FASTKD2,DHX29,FUS,NAT10,CDK4,LRPPRC,NAF1,ZFP36L2,HNRNPU,EIF5B,GTPBP2,KHDRBS1,NCL,E2F1,HNRNPA2B1,PUS7,PTBP1,PASK,EIF2B3,EIF3A,EXOSC9,KIAA0020,PSME4,NOLC1,HNRNPLL,HNRNPC,TAF15,WBSCR16	9606.ENSP00000221419,9606.ENSP00000236980,9606.ENSP00000251636,9606.ENSP00000254108,9606.ENSP00000257829,9606.ENSP00000257904,9606.ENSP00000260665,9606.ENSP00000274054,9606.ENSP00000282388,9606.ENSP00000283179,9606.ENSP00000289371,9606.ENSP00000303997,9606.ENSP00000313829,9606.ENSP00000318195,9606.ENSP00000345571,9606.ENSP00000346694,9606.ENSP00000348722,9606.ENSP00000349428,9606.ENSP00000351475,…
GO Process	GO:1904356	Regulation of telomere maintenance via telomere lengthening	0.00083	9	64	NAT10,NAF1,HNRNPU,PIF1,HNRNPA1,HNRNPA2B1,PARP1,NEK2,HNRNPC	9606.ENSP00000257829,9606.ENSP00000274054,9606.ENSP00000283179,9606.ENSP00000328174,9606.ENSP00000341826,9606.ENSP00000346694,9606.ENSP00000355759,9606.ENSP00000355966,9606.ENSP00000451291
GO Process	GO:0034644	Cellular response to uv	0.00096	10	83	DDB2,POLD3,BAX,CDC25A,NDNL2,PARP1,PCNA,CHEK1,POLD1,NEDD4	9606.ENSP00000256996,9606.ENSP00000263681,9606.ENSP00000293288,9606.ENSP00000303706,9606.ENSP00000330694,9606.ENSP00000355759,9606.ENSP00000368458,9606.ENSP00000388648,9606.ENSP00000406046,9606.ENSP00000424827
GO Process	GO:2000113	Negative regulation of cellular macromolecule biosynthetic process	0.00099	55	1470	CDC6,ERF,FBXO5,NR3C1,PRRX1,KLF2,NAT10,TIPIN,EED,ZNF215,ZFP36L2,HNRNPU,FZD1,CIART,HMGB2,PLK1,BIRC5,CBX2,KHDRBS1,NCL,BASP1,E2F7,PIF1,MTDH,HNRNPA1,H1F0,HMGB1,E2F1,HNRNPA2B1,PUS7,PASK,DLX1,E2F2,IRF2BP2,PARP1,CENPF,JUN,RBL1,PCNA,RFC1,HELLS,SLFN11,CBX6,NRG1,MXD3,BEND3,BAP1,BRCA1,NEDD4,SAMD1,RITA1,HNRNPC,DPF3,UHRF1,E2F8	9606.ENSP00000209728,9606.ENSP00000222329,9606.ENSP00000229758,9606.ENSP00000231509,9606.ENSP00000239461,9606.ENSP00000248071,9606.ENSP00000257829,9606.ENSP00000261881,9606.ENSP00000263360,9606.ENSP00000278319,9606.ENSP00000282388,9606.ENSP00000283179,9606.ENSP00000287934,9606.ENSP00000290363,9606.ENSP00000296503,9606.ENSP00000300093,9606.ENSP00000301633,9606.ENSP00000308750,9606.ENSP00000313829,…
GO Process	GO:0007051	Spindle organization	0.001	13	145	AURKA,FBXO5,CCNB1,CENPE,NUF2,HAUS1,BIRC5,PCNT,NEK2,ASPM,PRC1,CKAP5,TUBGCP5	9606.ENSP00000216911,9606.ENSP00000229758,9606.ENSP00000256442,9606.ENSP00000265148,9606.ENSP00000271452,9606.ENSP00000282058,9606.ENSP00000301633,9606.ENSP00000352572,9606.ENSP00000355966,9606.ENSP00000356379,9606.ENSP00000377793,9606.ENSP00000432768,9606.ENSP00000480316
GO Process	GO:0071158	Positive regulation of cell cycle arrest	0.001	10	84	AURKA,CCNB1,BAX,CDC25C,E2F7,E2F1,TFDP1,PCNA,BRCA1,E2F8	9606.ENSP00000216911,9606.ENSP00000256442,9606.ENSP00000293288,9606.ENSP00000321656,9606.ENSP00000323246,9606.ENSP00000345571,9606.ENSP00000364519,9606.ENSP00000368458,9606.ENSP00000418960,9606.ENSP00000481103
GO Process	GO:0000729	DNA double-strand break processing	0.0011	6	23	BRIP1,RNF138,NBN,DNA2,RBBP8,BRCA1	9606.ENSP00000259008,9606.ENSP00000261593,9606.ENSP00000265433,9606.ENSP00000351185,9606.ENSP00000382628,9606.ENSP00000418960
GO Process	GO:0006297	Nucleotide-excision repair, dna gap filling	0.0011	6	23	POLD3,PCNA,RFC3,RFC1,RFC4,POLD1	9606.ENSP00000263681,9606.ENSP00000368458,9606.ENSP00000369411,9606.ENSP00000371321,9606.ENSP00000376272,9606.ENSP00000406046
GO Process	GO:0048025	Negative regulation of mrna splicing, via spliceosome	0.0011	6	23	HNRNPL,HNRNPA2B1,PTBP1,RBMX,HNRNPK,SRSF10	9606.ENSP00000221419,9606.ENSP00000346694,9606.ENSP00000349428,9606.ENSP00000359645,9606.ENSP00000365439,9606.ENSP00000420195
GO Process	GO:0051053	Negative regulation of dna metabolic process	0.0012	12	126	MSH2,MSH6,NAT10,NBN,HNRNPU,RMI2,PIF1,H1FX,HNRNPA1,H1F0,PARP1,HNRNPC	9606.ENSP00000233146,9606.ENSP00000234420,9606.ENSP00000257829,9606.ENSP00000265433,9606.ENSP00000283179,9606.ENSP00000310356,9606.ENSP00000328174,9606.ENSP00000329662,9606.ENSP00000341826,9606.ENSP00000344504,9606.ENSP00000355759,9606.ENSP00000451291
GO Process	GO:0071478	Cellular response to radiation	0.0012	14	170	DDB2,POLD3,BAX,CDC25A,TLK2,NDNL2,NET1,PARP1,INTS7,PCNA,CHEK1,POLD1,FIGNL1,NEDD4	9606.ENSP00000256996,9606.ENSP00000263681,9606.ENSP00000293288,9606.ENSP00000303706,9606.ENSP00000316512,9606.ENSP00000330694,9606.ENSP00000347134,9606.ENSP00000355759,9606.ENSP00000355961,9606.ENSP00000368458,9606.ENSP00000388648,9606.ENSP00000406046,9606.ENSP00000410811,9606.ENSP00000424827
GO Process	GO:0000018	Regulation of dna recombination	0.0013	11	106	MSH2,MSH6,FUS,RMI2,ATAD5,H1FX,H1F0,PARP1,PAXIP1,CHEK1,FIGNL1	9606.ENSP00000233146,9606.ENSP00000234420,9606.ENSP00000254108,9606.ENSP00000310356,9606.ENSP00000313171,9606.ENSP00000329662,9606.ENSP00000344504,9606.ENSP00000355759,9606.ENSP00000384048,9606.ENSP00000388648,9606.ENSP00000410811
GO Process	GO:0043085	Positive regulation of catalytic activity	0.0013	55	1489	RALBP1,CAMKK1,CDC6,CAV2,KITLG,MSH2,MSH6,CDC25B,CCNB1,IRAK2,ARHGAP29,CENPE,NBN,NAF1,HNRNPU,MMP16,BAX,HMGB2,PLK1,CLSPN,F2R,DSCC1,DBF4B,STK25,PMAIP1,RASA3,HMGB1,PRKAA1,HNRNPA2B1,NET1,ARHGAP19,MAP3K5,IQGAP3,NEK2,KIF14,ATP1B1,PSRC1,JUN,SMAP2,PCNA,RFC3,HMGN1,RFC1,RFC4,SIPA1,PSME4,NRG1,ABHD5,PILRB,TBC1D9,PDGFC,DDX11,BORA,UHRF1,DENND1B	9606.ENSP00000019317,9606.ENSP00000158166,9606.ENSP00000209728,9606.ENSP00000222693,9606.ENSP00000228280,9606.ENSP00000233146,9606.ENSP00000234420,9606.ENSP00000245960,9606.ENSP00000256442,9606.ENSP00000256458,9606.ENSP00000260526,9606.ENSP00000265148,9606.ENSP00000265433,9606.ENSP00000274054,9606.ENSP00000283179,9606.ENSP00000286614,9606.ENSP00000293288,9606.ENSP00000296503,9606.ENSP00000300093,…
GO Process	GO:0032205	Negative regulation of telomere maintenance	0.0015	7	38	NAT10,NBN,HNRNPU,PIF1,HNRNPA1,PARP1,HNRNPC	9606.ENSP00000257829,9606.ENSP00000265433,9606.ENSP00000283179,9606.ENSP00000328174,9606.ENSP00000341826,9606.ENSP00000355759,9606.ENSP00000451291
GO Process	GO:0045841	Negative regulation of mitotic metaphase/anaphase transition	0.0015	6	25	FBXO5,RAD21,PLK1,BIRC5,BUB1,CENPF	9606.ENSP00000229758,9606.ENSP00000297338,9606.ENSP00000300093,9606.ENSP00000301633,9606.ENSP00000302530,9606.ENSP00000355922
GO Process	GO:0051254	Positive regulation of rna metabolic process	0.0015	62	1759	NR3C1,PRRX1,DLGAP5,YEATS4,KLF2,FUS,SMARCC1,CCNB1,NPAT,ZFP36L2,RIOK2,HNRNPU,ATAD2,FZD1,HMGB2,TRA2A,NCL,F2R,E2F7,H1FX,MTDH,GTF2F2,H1F0,PTGES2,HMGB1,E2F1,PRKAA1,MAP3K5,DLX1,E2F2,TFB2M,PARP1,MLLT11,PSRC1,BLOC1S2,RBMX,JUN,RBL1,ZNF367,TFDP1,HNRNPK,EXOSC9,HMGN1,RFC1,NRF1,PAXIP1,NOLC1,CHEK1,HNRNPLL,GNL3,ATXN7L3,CDK12,TOP2A,BRCA1,MYBL1,DDX11,SNRNP70,TAF15,DPF3,UHRF1,E2F8,HMGN3	9606.ENSP00000231509,9606.ENSP00000239461,9606.ENSP00000247191,9606.ENSP00000247843,9606.ENSP00000248071,9606.ENSP00000254108,9606.ENSP00000254480,9606.ENSP00000256442,9606.ENSP00000278612,9606.ENSP00000282388,9606.ENSP00000283109,9606.ENSP00000283179,9606.ENSP00000287394,9606.ENSP00000287934,9606.ENSP00000296503,9606.ENSP00000297071,9606.ENSP00000318195,9606.ENSP00000321326,9606.ENSP00000323246,…
GO Process	GO:0097193	Intrinsic apoptotic signaling pathway	0.0015	13	151	MSH2,MSH6,NBN,BAX,ATAD5,STK25,PMAIP1,CUL1,E2F1,MAP3K5,E2F2,MLLT11,BRCA1	9606.ENSP00000233146,9606.ENSP00000234420,9606.ENSP00000265433,9606.ENSP00000293288,9606.ENSP00000313171,9606.ENSP00000325748,9606.ENSP00000326119,9606.ENSP00000326804,9606.ENSP00000345571,9606.ENSP00000351908,9606.ENSP00000355249,9606.ENSP00000357917,9606.ENSP00000418960
GO Process	GO:0048522	Positive regulation of cellular process	0.0016	153	5579	CAMKK1,CDC6,AURKA,HNRNPL,CAV2,KITLG,FBXO5,NR3C1,MSH2,FASTKD2,PRRX1,CDC25B,DLGAP5,YEATS4,KLF2,DHX29,SNX4,FUS,SMARCC1,CCNB1,IRAK2,DDB2,NAT10,CDK4,MESDC2,TIPIN,EED,RAD18,CENPE,NBN,CPSF6,TRIM65,SH3GL1,NAF1,NPAT,ZFP36L2,RIOK2,HNRNPU,ATAD2,FZD1,BAX,HMGB2,TRA2A,RAD21,PLK1,CDT1,BIRC5,CDC25A,FEN1,ARL6IP1,CLSPN,ATAD5,KHDRBS1,NCL,F2R,CDC25C,DSCC1,MMP1,E2F7,DBF4B,STK25,PMAIP1,H1FX,NDNL2,HOMER1,CENPQ,MTDH,GTF…	9606.ENSP00000158166,9606.ENSP00000209728,9606.ENSP00000216911,9606.ENSP00000221419,9606.ENSP00000222693,9606.ENSP00000228280,9606.ENSP00000229758,9606.ENSP00000231509,9606.ENSP00000233146,9606.ENSP00000236980,9606.ENSP00000239461,9606.ENSP00000245960,9606.ENSP00000247191,9606.ENSP00000247843,9606.ENSP00000248071,9606.ENSP00000251636,9606.ENSP00000251775,9606.ENSP00000254108,9606.ENSP00000254480,…
GO Process	GO:2001020	Regulation of response to dna damage stimulus	0.0016	16	225	FBXO5,FUS,WDR76,RMI2,ATAD5,PMAIP1,HMGB1,PARP1,HNRNPK,PCNA,CDKN2D,PAXIP1,CHEK1,FIGNL1,BRCA1,DDX11	9606.ENSP00000229758,9606.ENSP00000254108,9606.ENSP00000263795,9606.ENSP00000310356,9606.ENSP00000313171,9606.ENSP00000326119,9606.ENSP00000345347,9606.ENSP00000355759,9606.ENSP00000365439,9606.ENSP00000368458,9606.ENSP00000377224,9606.ENSP00000384048,9606.ENSP00000388648,9606.ENSP00000410811,9606.ENSP00000418960,9606.ENSP00000440402
GO Process	GO:0071156	Regulation of cell cycle arrest	0.0017	11	110	AURKA,CCNB1,CDK4,BAX,CDC25C,E2F7,E2F1,TFDP1,PCNA,BRCA1,E2F8	9606.ENSP00000216911,9606.ENSP00000256442,9606.ENSP00000257904,9606.ENSP00000293288,9606.ENSP00000321656,9606.ENSP00000323246,9606.ENSP00000345571,9606.ENSP00000364519,9606.ENSP00000368458,9606.ENSP00000418960,9606.ENSP00000481103
GO Process	GO:0006268	DNA unwinding involved in DNA replication	0.0019	5	15	MCM4,MCM6,MCM2,MCM7,C10orf2	9606.ENSP00000262105,9606.ENSP00000264156,9606.ENSP00000265056,9606.ENSP00000307288,9606.ENSP00000309595
GO Process	GO:0010972	Negative regulation of g2/m transition of mitotic cell cycle	0.0019	10	92	CDC6,AURKA,NBN,RAD21,CLSPN,CUL1,NAE1,ORC1,PSME4,BRCA1	9606.ENSP00000209728,9606.ENSP00000216911,9606.ENSP00000265433,9606.ENSP00000297338,9606.ENSP00000312995,9606.ENSP00000326804,9606.ENSP00000351990,9606.ENSP00000360623,9606.ENSP00000384211,9606.ENSP00000418960
GO Process	GO:0050794	Regulation of cellular process	0.0019	265	10932	RALBP1,TARBP1,CAMKK1,CDC6,AURKA,HNRNPL,ERF,CAV2,KITLG,FBXO5,NR3C1,MSH2,MSH6,FASTKD2,PRRX1,UNG,SNRPA,CDC25B,DLGAP5,YEATS4,KLF2,DHX29,SNX4,FUS,SMARCC1,CCNB1,IRAK2,DDB2,NAT10,CDK4,USP37,TEX2,BRIP1,ARHGAP29,LRPPRC,RNF138,UTP20,MESDC2,TIPIN,TSPAN13,EED,WDR76,RAD18,MCM2,CENPE,NBN,HNRNPH3,SLC2A4RG,CPSF6,CDH11,TRIM65,SH3GL1,NAF1,PM20D2,ZNF215,NPAT,CEP164,CABLES2,HAUS1,ZFP36L2,RIOK2,HNRNPU,ATAD2,FZD1,CCNB…	9606.ENSP00000019317,9606.ENSP00000040877,9606.ENSP00000158166,9606.ENSP00000209728,9606.ENSP00000216911,9606.ENSP00000221419,9606.ENSP00000222329,9606.ENSP00000222693,9606.ENSP00000228280,9606.ENSP00000229758,9606.ENSP00000231509,9606.ENSP00000233146,9606.ENSP00000234420,9606.ENSP00000236980,9606.ENSP00000239461,9606.ENSP00000242576,9606.ENSP00000243563,9606.ENSP00000245960,9606.ENSP00000247191,…
GO Process	GO:0007062	Sister chromatid cohesion	0.0025	7	42	RAD21,PLK1,BUB1,ESCO2,DSCC1,MCMBP,DDX11	9606.ENSP00000297338,9606.ENSP00000300093,9606.ENSP00000302530,9606.ENSP00000306999,9606.ENSP00000322180,9606.ENSP00000353098,9606.ENSP00000440402
GO Process	GO:0048523	Negative regulation of cellular process	0.0025	136	4874	CDC6,AURKA,HNRNPL,ERF,CAV2,KITLG,FBXO5,NR3C1,MSH2,MSH6,PRRX1,UNG,KLF2,FUS,SMARCC1,CCNB1,NAT10,CDK4,BRIP1,LRPPRC,UTP20,TIPIN,EED,RAD18,MCM2,NBN,NAF1,ZNF215,NPAT,ZFP36L2,HNRNPU,ATAD2,FZD1,CIART,BAX,HMGB2,ABCE1,RAD21,PLK1,CDT1,BIRC5,BUB1,ARL6IP1,CBX2,RMI2,CLSPN,ATAD5,KHDRBS1,TLK2,NCL,BASP1,F2R,CDC25C,E2F7,CUL1,PIF1,MINA,H1FX,COL7A1,RASA3,CDKN3,MTDH,HNRNPA1,H1F0,HMGB1,E2F1,SVIP,PRKAA1,HNRNPA2B1,PUS7,…	9606.ENSP00000209728,9606.ENSP00000216911,9606.ENSP00000221419,9606.ENSP00000222329,9606.ENSP00000222693,9606.ENSP00000228280,9606.ENSP00000229758,9606.ENSP00000231509,9606.ENSP00000233146,9606.ENSP00000234420,9606.ENSP00000239461,9606.ENSP00000242576,9606.ENSP00000248071,9606.ENSP00000254108,9606.ENSP00000254480,9606.ENSP00000256442,9606.ENSP00000257829,9606.ENSP00000257904,9606.ENSP00000259008,…
GO Process	GO:0000226	Microtubule cytoskeleton organization	0.0026	25	492	AURKA,FBXO5,CCNB1,CENPE,NUF2,HAUS1,PLK1,BIRC5,XRCC2,PCNT,NEK2,ASPM,PSRC1,BLOC1S2,KIF2C,CNTROB,PRC1,KIF20A,ODF2,FIGNL1,BRCA1,CKAP5,SLC16A1,GAS2L3,TUBGCP5	9606.ENSP00000216911,9606.ENSP00000229758,9606.ENSP00000256442,9606.ENSP00000265148,9606.ENSP00000271452,9606.ENSP00000282058,9606.ENSP00000300093,9606.ENSP00000301633,9606.ENSP00000352271,9606.ENSP00000352572,9606.ENSP00000355966,9606.ENSP00000356379,9606.ENSP00000358925,9606.ENSP00000359398,9606.ENSP00000361298,9606.ENSP00000369614,9606.ENSP00000377793,9606.ENSP00000378356,9606.ENSP00000403453,…
GO Process	GO:0050790	Regulation of catalytic activity	0.0026	77	2386	RALBP1,CAMKK1,CDC6,CAV2,KITLG,FBXO5,MSH2,MSH6,CDC25B,CCNB1,IRAK2,CDK4,ARHGAP29,MCM2,CENPE,NBN,NAF1,HNRNPU,MMP16,CCNB2,BAX,HMGB2,ABCE1,PLK1,BIRC5,CDC25A,ARL6IP1,CLSPN,F2R,CDC25C,DSCC1,DBF4B,STK25,PMAIP1,PIF1,COL7A1,RASA3,CDKN3,HMGB1,PRKAA1,HNRNPA2B1,NET1,ARHGAP19,MAP3K5,IQGAP3,SH3BP5L,PARP1,NEK2,KIF14,ATP1B1,NES,PSRC1,JUN,SMAP2,RBL1,PCNA,RFC3,HMGN1,RFC1,RFC4,CDKN2D,PTTG1,SIPA1,CCNF,PSME4,NRG1,ABHD…	9606.ENSP00000019317,9606.ENSP00000158166,9606.ENSP00000209728,9606.ENSP00000222693,9606.ENSP00000228280,9606.ENSP00000229758,9606.ENSP00000233146,9606.ENSP00000234420,9606.ENSP00000245960,9606.ENSP00000256442,9606.ENSP00000256458,9606.ENSP00000257904,9606.ENSP00000260526,9606.ENSP00000265056,9606.ENSP00000265148,9606.ENSP00000265433,9606.ENSP00000274054,9606.ENSP00000283179,9606.ENSP00000286614,…
GO Process	GO:0009892	Negative regulation of metabolic process	0.0027	95	3124	CDC6,AURKA,HNRNPL,ERF,FBXO5,NR3C1,MSH2,MSH6,PRRX1,KLF2,FUS,SMARCC1,CCNB1,NAT10,BRIP1,LRPPRC,TIPIN,EED,NBN,NAF1,ZNF215,NPAT,ZFP36L2,HNRNPU,FZD1,CIART,BAX,HMGB2,ABCE1,PLK1,BIRC5,GTPBP2,ARL6IP1,CBX2,RMI2,KHDRBS1,TLK2,NCL,BASP1,E2F7,PIF1,MINA,H1FX,COL7A1,PNRC2,MTDH,HNRNPA1,H1F0,HMGB1,E2F1,SVIP,PRKAA1,HNRNPA2B1,PUS7,PTBP1,PASK,IQGAP3,DLX1,E2F2,SH3BP5L,IRF2BP2,PARP1,CENPF,EIF3A,RBMX,JUN,RBL1,HNRNPK,PCN…	9606.ENSP00000209728,9606.ENSP00000216911,9606.ENSP00000221419,9606.ENSP00000222329,9606.ENSP00000229758,9606.ENSP00000231509,9606.ENSP00000233146,9606.ENSP00000234420,9606.ENSP00000239461,9606.ENSP00000248071,9606.ENSP00000254108,9606.ENSP00000254480,9606.ENSP00000256442,9606.ENSP00000257829,9606.ENSP00000259008,9606.ENSP00000260665,9606.ENSP00000261881,9606.ENSP00000263360,9606.ENSP00000265433,…
GO Process	GO:0009124	Nucleoside monophosphate biosynthetic process	0.0028	7	43	PPAT,DCK,IMPDH2,UCK2,GART,PRPS2,GMPS	9606.ENSP00000264220,9606.ENSP00000286648,9606.ENSP00000321584,9606.ENSP00000356853,9606.ENSP00000371253,9606.ENSP00000381504,9606.ENSP00000419851
GO Process	GO:1904357	Negative regulation of telomere maintenance via telomere lengthening	0.003	6	29	NAT10,HNRNPU,PIF1,HNRNPA1,PARP1,HNRNPC	9606.ENSP00000257829,9606.ENSP00000283179,9606.ENSP00000328174,9606.ENSP00000341826,9606.ENSP00000355759,9606.ENSP00000451291
GO Process	GO:0048518	Positive regulation of biological process	0.0031	163	6112	CAMKK1,CDC6,AURKA,HNRNPL,PLIN3,CAV2,KITLG,FBXO5,NR3C1,MSH2,FASTKD2,PRRX1,CDC25B,DLGAP5,YEATS4,KLF2,DHX29,SNX4,FUS,SMARCC1,CCNB1,IRAK2,DDB2,NAT10,CDK4,MESDC2,TIPIN,EED,RAD18,CENPE,NBN,CPSF6,TRIM65,SH3GL1,NAF1,NPAT,ZFP36L2,RIOK2,HNRNPU,ATAD2,FZD1,BAX,HMGB2,TRA2A,RAD21,PLK1,CDT1,BIRC5,CDC25A,FEN1,ARL6IP1,CLSPN,ATAD5,KHDRBS1,NCL,BASP1,F2R,CDC25C,DSCC1,MMP1,E2F7,DBF4B,STK25,PMAIP1,CUL1,H1FX,NDNL2,HOME…	9606.ENSP00000158166,9606.ENSP00000209728,9606.ENSP00000216911,9606.ENSP00000221419,9606.ENSP00000221957,9606.ENSP00000222693,9606.ENSP00000228280,9606.ENSP00000229758,9606.ENSP00000231509,9606.ENSP00000233146,9606.ENSP00000236980,9606.ENSP00000239461,9606.ENSP00000245960,9606.ENSP00000247191,9606.ENSP00000247843,9606.ENSP00000248071,9606.ENSP00000251636,9606.ENSP00000251775,9606.ENSP00000254108,…
GO Process	GO:0048519	Negative regulation of biological process	0.0031	147	5389	CDC6,AURKA,HNRNPL,ERF,CAV2,KITLG,FBXO5,NR3C1,MSH2,MSH6,PRRX1,UNG,KLF2,FUS,SMARCC1,CCNB1,IRAK2,NAT10,CDK4,BRIP1,LRPPRC,UTP20,TIPIN,EED,RAD18,MCM2,NBN,NAF1,ZNF215,NPAT,ZFP36L2,HNRNPU,ATAD2,FZD1,CIART,BAX,HMGB2,ABCE1,RAD21,PLK1,CDT1,BIRC5,BUB1,GTPBP2,ARL6IP1,CBX2,RMI2,RNF26,CLSPN,ATAD5,KHDRBS1,TLK2,NCL,BASP1,F2R,CDC25C,E2F7,CUL1,PIF1,MINA,H1FX,COL7A1,PNRC2,RASA3,CDKN3,MTDH,HNRNPA1,H1F0,HMGB1,E2F1,SV…	9606.ENSP00000209728,9606.ENSP00000216911,9606.ENSP00000221419,9606.ENSP00000222329,9606.ENSP00000222693,9606.ENSP00000228280,9606.ENSP00000229758,9606.ENSP00000231509,9606.ENSP00000233146,9606.ENSP00000234420,9606.ENSP00000239461,9606.ENSP00000242576,9606.ENSP00000248071,9606.ENSP00000254108,9606.ENSP00000254480,9606.ENSP00000256442,9606.ENSP00000256458,9606.ENSP00000257829,9606.ENSP00000257904,…
GO Process	GO:0006323	DNA packaging	0.0033	15	215	NASP,CCNB1,MCM2,HMGB2,CHAF1A,CHAF1B,NCAPD2,H1FX,CENPQ,H1F0,HELLS,PSME4,BEND3,TOP2A,NAP1L1	9606.ENSP00000255120,9606.ENSP00000256442,9606.ENSP00000265056,9606.ENSP00000296503,9606.ENSP00000301280,9606.ENSP00000315700,9606.ENSP00000325017,9606.ENSP00000329662,9606.ENSP00000337289,9606.ENSP00000344504,9606.ENSP00000377601,9606.ENSP00000384211,9606.ENSP00000411268,9606.ENSP00000411532,9606.ENSP00000477538
GO Process	GO:0060249	Anatomical structure homeostasis	0.0033	21	380	POLE2,POLD3,NBN,BAX,FEN1,F2R,PIF1,HOMER1,PRKAA1,PRIM1,DNA2,EXO1,PARP1,DCLRE1B,PCNA,RFC3,RFC1,RFC4,POLD1,CCNE2,PRIM2	9606.ENSP00000216367,9606.ENSP00000263681,9606.ENSP00000265433,9606.ENSP00000293288,9606.ENSP00000305480,9606.ENSP00000321326,9606.ENSP00000328174,9606.ENSP00000334382,9606.ENSP00000346148,9606.ENSP00000350491,9606.ENSP00000351185,9606.ENSP00000355506,9606.ENSP00000355759,9606.ENSP00000358576,9606.ENSP00000368458,9606.ENSP00000369411,9606.ENSP00000371321,9606.ENSP00000376272,9606.ENSP00000406046,…
GO Process	GO:0006298	Mismatch repair	0.0034	6	30	MSH2,MSH6,POLD3,EXO1,PCNA,POLD1	9606.ENSP00000233146,9606.ENSP00000234420,9606.ENSP00000263681,9606.ENSP00000355506,9606.ENSP00000368458,9606.ENSP00000406046
GO Process	GO:0044818	Mitotic g2/m transition checkpoint	0.0034	6	30	CDC6,NBN,CLSPN,NAE1,ORC1,BRCA1	9606.ENSP00000209728,9606.ENSP00000265433,9606.ENSP00000312995,9606.ENSP00000351990,9606.ENSP00000360623,9606.ENSP00000418960
GO Process	GO:0050789	Regulation of biological process	0.0036	274	11475	RALBP1,TARBP1,CAMKK1,CDC6,AURKA,HNRNPL,PLIN3,ERF,CAV2,KITLG,FBXO5,NR3C1,MSH2,MSH6,FASTKD2,PRRX1,UNG,SNRPA,CDC25B,DLGAP5,YEATS4,KLF2,DHX29,SNX4,FUS,SMARCC1,CCNB1,IRAK2,DDB2,NAT10,CDK4,USP37,TEX2,BRIP1,TGS1,ARHGAP29,LRPPRC,RNF138,UTP20,MESDC2,TIPIN,TSPAN13,EED,WDR76,RAD18,MCM2,CENPE,NBN,HNRNPH3,SLC2A4RG,CPSF6,CDH11,TRIM65,SH3GL1,NAF1,PM20D2,ZNF215,NPAT,CEP164,CABLES2,HAUS1,ZFP36L2,RIOK2,HNRNPU,ATAD…	9606.ENSP00000019317,9606.ENSP00000040877,9606.ENSP00000158166,9606.ENSP00000209728,9606.ENSP00000216911,9606.ENSP00000221419,9606.ENSP00000221957,9606.ENSP00000222329,9606.ENSP00000222693,9606.ENSP00000228280,9606.ENSP00000229758,9606.ENSP00000231509,9606.ENSP00000233146,9606.ENSP00000234420,9606.ENSP00000236980,9606.ENSP00000239461,9606.ENSP00000242576,9606.ENSP00000243563,9606.ENSP00000245960,…
GO Process	GO:0007052	Mitotic spindle organization	0.0038	9	81	AURKA,CCNB1,CENPE,NUF2,BIRC5,PCNT,NEK2,PRC1,CKAP5	9606.ENSP00000216911,9606.ENSP00000256442,9606.ENSP00000265148,9606.ENSP00000271452,9606.ENSP00000301633,9606.ENSP00000352572,9606.ENSP00000355966,9606.ENSP00000377793,9606.ENSP00000432768
GO Process	GO:0010212	Response to ionizing radiation	0.0038	12	145	MSH2,BAX,TLK2,PRKAA1,NET1,XRCC2,PARP1,INTS7,RAD54L,PAXIP1,FIGNL1,BRCA1	9606.ENSP00000233146,9606.ENSP00000293288,9606.ENSP00000316512,9606.ENSP00000346148,9606.ENSP00000347134,9606.ENSP00000352271,9606.ENSP00000355759,9606.ENSP00000355961,9606.ENSP00000361043,9606.ENSP00000384048,9606.ENSP00000410811,9606.ENSP00000418960
GO Process	GO:0051656	Establishment of organelle localization	0.0038	21	385	DLGAP5,CCNB1,LRPPRC,CENPE,NUF2,BBS5,ABCE1,PLK1,CDT1,BIRC5,STK25,COL7A1,CENPQ,TMEM201,CHAMP1,CENPF,KIF14,PSRC1,BLOC1S2,KIF2C,MYO19	9606.ENSP00000247191,9606.ENSP00000256442,9606.ENSP00000260665,9606.ENSP00000265148,9606.ENSP00000271452,9606.ENSP00000295240,9606.ENSP00000296577,9606.ENSP00000300093,9606.ENSP00000301019,9606.ENSP00000301633,9606.ENSP00000325748,9606.ENSP00000332371,9606.ENSP00000337289,9606.ENSP00000344503,9606.ENSP00000354730,9606.ENSP00000355922,9606.ENSP00000356319,9606.ENSP00000358925,9606.ENSP00000359398,…
GO Process	GO:0071897	DNA biosynthetic process	0.0038	10	101	POLE2,POLD3,CENPF,DTL,PCNA,RFC3,RFC1,RFC4,CDKN2D,POLD1	9606.ENSP00000216367,9606.ENSP00000263681,9606.ENSP00000355922,9606.ENSP00000355958,9606.ENSP00000368458,9606.ENSP00000369411,9606.ENSP00000371321,9606.ENSP00000376272,9606.ENSP00000377224,9606.ENSP00000406046
GO Process	GO:1900264	Positive regulation of dna-directed dna polymerase activity	0.0044	4	9	DSCC1,PCNA,RFC3,RFC4	9606.ENSP00000322180,9606.ENSP00000368458,9606.ENSP00000369411,9606.ENSP00000376272
GO Process	GO:0031572	G2 DNA damage checkpoint	0.0045	6	32	NBN,PLK1,CLSPN,DTL,CHEK1,BRCA1	9606.ENSP00000265433,9606.ENSP00000300093,9606.ENSP00000312995,9606.ENSP00000355958,9606.ENSP00000388648,9606.ENSP00000418960
GO Process	GO:0065007	Biological regulation	0.0045	287	12171	RALBP1,TARBP1,CAMKK1,CDC6,POLE2,AURKA,HNRNPL,PLIN3,ERF,CAV2,KITLG,FBXO5,NR3C1,MSH2,MSH6,FASTKD2,PRRX1,UNG,SNRPA,CDC25B,DLGAP5,YEATS4,KLF2,DHX29,SNX4,FUS,SMARCC1,CCNB1,IRAK2,DDB2,NAT10,CDK4,USP37,TEX2,BRIP1,TGS1,ARHGAP29,LRPPRC,RNF138,UTP20,MESDC2,TIPIN,TSPAN13,EED,POLD3,WDR76,PPAT,RAD18,MCM2,CENPE,NBN,HNRNPH3,SLC2A4RG,CPSF6,CDH11,TRIM65,SH3GL1,NAF1,PM20D2,ZNF215,NPAT,CEP164,CABLES2,HAUS1,ZFP36L2,…	9606.ENSP00000019317,9606.ENSP00000040877,9606.ENSP00000158166,9606.ENSP00000209728,9606.ENSP00000216367,9606.ENSP00000216911,9606.ENSP00000221419,9606.ENSP00000221957,9606.ENSP00000222329,9606.ENSP00000222693,9606.ENSP00000228280,9606.ENSP00000229758,9606.ENSP00000231509,9606.ENSP00000233146,9606.ENSP00000234420,9606.ENSP00000236980,9606.ENSP00000239461,9606.ENSP00000242576,9606.ENSP00000243563,…
GO Process	GO:0044093	Positive regulation of molecular function	0.0047	62	1842	RALBP1,CAMKK1,CDC6,HNRNPL,CAV2,KITLG,MSH2,MSH6,CDC25B,CCNB1,IRAK2,ARHGAP29,CENPE,NBN,NAF1,HNRNPU,MMP16,FZD1,BAX,HMGB2,PLK1,CDT1,CLSPN,F2R,DSCC1,DBF4B,STK25,PMAIP1,RASA3,MTDH,H1F0,HMGB1,PRKAA1,HNRNPA2B1,NET1,ARHGAP19,MAP3K5,IQGAP3,PARP1,NEK2,KIF14,ATP1B1,PSRC1,JUN,SMAP2,TFDP1,PCNA,RFC3,HMGN1,RFC1,RFC4,SIPA1,PSME4,NRG1,ABHD5,PILRB,TBC1D9,PDGFC,DDX11,BORA,UHRF1,DENND1B	9606.ENSP00000019317,9606.ENSP00000158166,9606.ENSP00000209728,9606.ENSP00000221419,9606.ENSP00000222693,9606.ENSP00000228280,9606.ENSP00000233146,9606.ENSP00000234420,9606.ENSP00000245960,9606.ENSP00000256442,9606.ENSP00000256458,9606.ENSP00000260526,9606.ENSP00000265148,9606.ENSP00000265433,9606.ENSP00000274054,9606.ENSP00000283179,9606.ENSP00000286614,9606.ENSP00000287934,9606.ENSP00000293288,…
GO Process	GO:0009156	Ribonucleoside monophosphate biosynthetic process	0.0052	6	33	PPAT,IMPDH2,UCK2,GART,PRPS2,GMPS	9606.ENSP00000264220,9606.ENSP00000321584,9606.ENSP00000356853,9606.ENSP00000371253,9606.ENSP00000381504,9606.ENSP00000419851
GO Process	GO:0033314	Mitotic dna replication checkpoint	0.0059	4	10	CDC6,CLSPN,NAE1,ORC1	9606.ENSP00000209728,9606.ENSP00000312995,9606.ENSP00000351990,9606.ENSP00000360623
GO Process	GO:0009127	Purine nucleoside monophosphate biosynthetic process	0.0064	5	21	PPAT,DCK,IMPDH2,GART,GMPS	9606.ENSP00000264220,9606.ENSP00000286648,9606.ENSP00000321584,9606.ENSP00000371253,9606.ENSP00000419851
GO Process	GO:0032211	Negative regulation of telomere maintenance via telomerase	0.0064	5	21	NAT10,HNRNPU,PIF1,HNRNPA1,HNRNPC	9606.ENSP00000257829,9606.ENSP00000283179,9606.ENSP00000328174,9606.ENSP00000341826,9606.ENSP00000451291
GO Process	GO:0042276	Error-prone translesion synthesis	0.0064	5	21	POLE2,PCNA,RFC3,RFC1,RFC4	9606.ENSP00000216367,9606.ENSP00000368458,9606.ENSP00000369411,9606.ENSP00000371321,9606.ENSP00000376272
GO Process	GO:0110032	Positive regulation of g2/mi transition of meiotic cell cycle	0.0065	3	3	CDC25B,CDC25A,CDC25C	9606.ENSP00000245960,9606.ENSP00000303706,9606.ENSP00000321656
GO Process	GO:2000573	Positive regulation of dna biosynthetic process	0.0073	8	70	NAF1,DSCC1,HNRNPA1,HNRNPA2B1,NEK2,PCNA,RFC3,RFC4	9606.ENSP00000274054,9606.ENSP00000322180,9606.ENSP00000341826,9606.ENSP00000346694,9606.ENSP00000355966,9606.ENSP00000368458,9606.ENSP00000369411,9606.ENSP00000376272
GO Process	GO:0032069	Regulation of nuclease activity	0.0076	5	22	HMGB2,ABCE1,HMGB1,PCNA,DDX11	9606.ENSP00000296503,9606.ENSP00000296577,9606.ENSP00000345347,9606.ENSP00000368458,9606.ENSP00000440402
GO Process	GO:0070987	Error-free translesion synthesis	0.0076	5	22	PCNA,RFC3,RFC1,RFC4,POLD1	9606.ENSP00000368458,9606.ENSP00000369411,9606.ENSP00000371321,9606.ENSP00000376272,9606.ENSP00000406046
GO Process	GO:1902850	Microtubule cytoskeleton organization involved in mitosis	0.0077	10	112	AURKA,CCNB1,CENPE,NUF2,PLK1,BIRC5,PCNT,NEK2,PRC1,CKAP5	9606.ENSP00000216911,9606.ENSP00000256442,9606.ENSP00000265148,9606.ENSP00000271452,9606.ENSP00000300093,9606.ENSP00000301633,9606.ENSP00000352572,9606.ENSP00000355966,9606.ENSP00000377793,9606.ENSP00000432768
GO Process	GO:0051347	Positive regulation of transferase activity	0.0091	30	705	CAMKK1,CDC6,KITLG,CDC25B,CCNB1,IRAK2,CENPE,NBN,NAF1,PLK1,CLSPN,F2R,DSCC1,DBF4B,STK25,PRKAA1,HNRNPA2B1,MAP3K5,IQGAP3,NEK2,KIF14,PSRC1,PCNA,RFC3,HMGN1,RFC4,NRG1,PILRB,PDGFC,BORA	9606.ENSP00000158166,9606.ENSP00000209728,9606.ENSP00000228280,9606.ENSP00000245960,9606.ENSP00000256442,9606.ENSP00000256458,9606.ENSP00000265148,9606.ENSP00000265433,9606.ENSP00000274054,9606.ENSP00000300093,9606.ENSP00000312995,9606.ENSP00000321326,9606.ENSP00000322180,9606.ENSP00000323663,9606.ENSP00000325748,9606.ENSP00000346148,9606.ENSP00000346694,9606.ENSP00000351908,9606.ENSP00000354451,…
GO Process	GO:0010628	Positive regulation of gene expression	0.0098	73	2337	HNRNPL,NR3C1,FASTKD2,PRRX1,DLGAP5,YEATS4,KLF2,DHX29,FUS,SMARCC1,CCNB1,NAT10,CDK4,NPAT,RIOK2,HNRNPU,ATAD2,FZD1,HMGB2,TRA2A,KHDRBS1,NCL,F2R,E2F7,H1FX,GTF2F2,H1F0,PTGES2,HMGB1,E2F1,PRKAA1,POLR3H,PASK,MAP3K5,IQGAP3,DLX1,E2F2,TFB2M,PARP1,MLLT11,PSRC1,BLOC1S2,RBMX,JUN,RBL1,ZNF367,TFDP1,HNRNPK,EXOSC9,HMGN1,RFC1,NRF1,POLR3G,PAXIP1,NRG1,NOLC1,CHEK1,HNRNPLL,GNL3,ATXN7L3,CDK12,TOP2A,BRCA1,MYBL1,DDX11,HNRNPC…	9606.ENSP00000221419,9606.ENSP00000231509,9606.ENSP00000236980,9606.ENSP00000239461,9606.ENSP00000247191,9606.ENSP00000247843,9606.ENSP00000248071,9606.ENSP00000251636,9606.ENSP00000254108,9606.ENSP00000254480,9606.ENSP00000256442,9606.ENSP00000257829,9606.ENSP00000257904,9606.ENSP00000278612,9606.ENSP00000283109,9606.ENSP00000283179,9606.ENSP00000287394,9606.ENSP00000287934,9606.ENSP00000296503,…
GO Process	GO:0006915	Apoptotic process	0.01	36	918	KITLG,NR3C1,MSH2,MSH6,MCM2,NBN,EXOG,BAX,HMGB2,RAD21,BIRC5,BUB1,ARL6IP1,CDCA7,ATAD5,STK25,PMAIP1,CUL1,H1F0,HMGB1,E2F1,MAP3K5,NAE1,E2F2,PARP1,MLLT11,SMNDC1,BLOC1S2,JUN,TFDP1,CIT,CHEK1,TOP2A,BRCA1,API5,TRAF3	9606.ENSP00000228280,9606.ENSP00000231509,9606.ENSP00000233146,9606.ENSP00000234420,9606.ENSP00000265056,9606.ENSP00000265433,9606.ENSP00000287675,9606.ENSP00000293288,9606.ENSP00000296503,9606.ENSP00000297338,9606.ENSP00000301633,9606.ENSP00000302530,9606.ENSP00000306788,9606.ENSP00000306968,9606.ENSP00000313171,9606.ENSP00000325748,9606.ENSP00000326119,9606.ENSP00000326804,9606.ENSP00000344504,…
GO Process	GO:0032210	Regulation of telomere maintenance via telomerase	0.01	7	55	NAT10,NAF1,HNRNPU,PIF1,HNRNPA1,NEK2,HNRNPC	9606.ENSP00000257829,9606.ENSP00000274054,9606.ENSP00000283179,9606.ENSP00000328174,9606.ENSP00000341826,9606.ENSP00000355966,9606.ENSP00000451291
GO Process	GO:0045893	Positive regulation of transcription, dna-templated	0.01	54	1587	NR3C1,PRRX1,DLGAP5,YEATS4,KLF2,SMARCC1,NPAT,HNRNPU,ATAD2,FZD1,HMGB2,NCL,F2R,E2F7,H1FX,GTF2F2,H1F0,PTGES2,HMGB1,E2F1,PRKAA1,MAP3K5,DLX1,E2F2,TFB2M,PARP1,MLLT11,PSRC1,BLOC1S2,RBMX,JUN,RBL1,ZNF367,TFDP1,HNRNPK,EXOSC9,HMGN1,RFC1,NRF1,PAXIP1,NOLC1,CHEK1,GNL3,ATXN7L3,CDK12,TOP2A,BRCA1,MYBL1,DDX11,TAF15,DPF3,UHRF1,E2F8,HMGN3	9606.ENSP00000231509,9606.ENSP00000239461,9606.ENSP00000247191,9606.ENSP00000247843,9606.ENSP00000248071,9606.ENSP00000254480,9606.ENSP00000278612,9606.ENSP00000283179,9606.ENSP00000287394,9606.ENSP00000287934,9606.ENSP00000296503,9606.ENSP00000318195,9606.ENSP00000321326,9606.ENSP00000323246,9606.ENSP00000329662,9606.ENSP00000340823,9606.ENSP00000344504,9606.ENSP00000345341,9606.ENSP00000345347,…
GO Process	GO:0072425	Signal transduction involved in g2 dna damage checkpoint	0.01	4	12	PLK1,DTL,CHEK1,BRCA1	9606.ENSP00000300093,9606.ENSP00000355958,9606.ENSP00000388648,9606.ENSP00000418960
GO Process	GO:2000105	Positive regulation of dna-dependent dna replication	0.01	4	12	CDT1,E2F7,DBF4B,E2F8	9606.ENSP00000301019,9606.ENSP00000323246,9606.ENSP00000323663,9606.ENSP00000481103
GO Process	GO:1903507	Negative regulation of nucleic acid-templated transcription	0.0105	47	1324	ERF,NR3C1,PRRX1,KLF2,EED,ZNF215,NPAT,HNRNPU,FZD1,CIART,HMGB2,PLK1,BIRC5,CBX2,KHDRBS1,BASP1,E2F7,MINA,MTDH,H1F0,HMGB1,E2F1,HNRNPA2B1,DLX1,E2F2,IRF2BP2,PARP1,CENPF,JUN,RBL1,PCNA,RFC1,HELLS,RBBP8,CBX6,NRG1,TONSL,MXD3,BEND3,BAP1,BRCA1,NEDD4,SAMD1,RITA1,DPF3,UHRF1,E2F8	9606.ENSP00000222329,9606.ENSP00000231509,9606.ENSP00000239461,9606.ENSP00000248071,9606.ENSP00000263360,9606.ENSP00000278319,9606.ENSP00000278612,9606.ENSP00000283179,9606.ENSP00000287934,9606.ENSP00000290363,9606.ENSP00000296503,9606.ENSP00000300093,9606.ENSP00000301633,9606.ENSP00000308750,9606.ENSP00000313829,9606.ENSP00000319281,9606.ENSP00000323246,9606.ENSP00000328251,9606.ENSP00000338235,…
GO Process	GO:0006283	Transcription-coupled nucleotide-excision repair	0.0108	8	75	POLD3,PCNA,RFC3,HMGN1,RFC1,RFC4,POLD1,GTF2H3	9606.ENSP00000263681,9606.ENSP00000368458,9606.ENSP00000369411,9606.ENSP00000370125,9606.ENSP00000371321,9606.ENSP00000376272,9606.ENSP00000406046,9606.ENSP00000445162
GO Process	GO:0009163	Nucleoside biosynthetic process	0.0108	6	39	DCK,IMPDH2,UCK2,AMD1,MTAP,GMPS	9606.ENSP00000286648,9606.ENSP00000321584,9606.ENSP00000356853,9606.ENSP00000357880,9606.ENSP00000369519,9606.ENSP00000419851
GO Process	GO:0032875	Regulation of dna endoreduplication	0.0108	3	4	FBXO5,E2F7,E2F8	9606.ENSP00000229758,9606.ENSP00000323246,9606.ENSP00000481103
GO Process	GO:1902975	Mitotic dna replication initiation	0.0108	3	4	MCM4,MCM2,MCM3	9606.ENSP00000262105,9606.ENSP00000265056,9606.ENSP00000480987
GO Process	GO:1903508	Positive regulation of nucleic acid-templated transcription	0.0108	56	1670	NR3C1,PRRX1,DLGAP5,YEATS4,KLF2,FUS,SMARCC1,NPAT,HNRNPU,ATAD2,FZD1,HMGB2,NCL,F2R,E2F7,H1FX,MTDH,GTF2F2,H1F0,PTGES2,HMGB1,E2F1,PRKAA1,MAP3K5,DLX1,E2F2,TFB2M,PARP1,MLLT11,PSRC1,BLOC1S2,RBMX,JUN,RBL1,ZNF367,TFDP1,HNRNPK,EXOSC9,HMGN1,RFC1,NRF1,PAXIP1,NOLC1,CHEK1,GNL3,ATXN7L3,CDK12,TOP2A,BRCA1,MYBL1,DDX11,TAF15,DPF3,UHRF1,E2F8,HMGN3	9606.ENSP00000231509,9606.ENSP00000239461,9606.ENSP00000247191,9606.ENSP00000247843,9606.ENSP00000248071,9606.ENSP00000254108,9606.ENSP00000254480,9606.ENSP00000278612,9606.ENSP00000283179,9606.ENSP00000287394,9606.ENSP00000287934,9606.ENSP00000296503,9606.ENSP00000318195,9606.ENSP00000321326,9606.ENSP00000323246,9606.ENSP00000329662,9606.ENSP00000338235,9606.ENSP00000340823,9606.ENSP00000344504,…
GO Process	GO:0030262	Apoptotic nuclear changes	0.012	5	25	EXOG,HMGB2,H1F0,HMGB1,TOP2A	9606.ENSP00000287675,9606.ENSP00000296503,9606.ENSP00000344504,9606.ENSP00000345347,9606.ENSP00000411532
GO Process	GO:0016446	Somatic hypermutation of immunoglobulin genes	0.0123	4	13	MSH2,MSH6,UNG,EXO1	9606.ENSP00000233146,9606.ENSP00000234420,9606.ENSP00000242576,9606.ENSP00000355506
GO Process	GO:0022411	Cellular component disassembly	0.0124	20	395	SMARCC1,CCNB1,MRPL3,SH3GL1,MMP16,EXOG,FZD1,CCNB2,HMGB2,ABCE1,PLK1,MMP1,H1F0,HMGB1,KIF2C,MRPS16,MRPL19,NRG1,TOP2A,CKAP5	9606.ENSP00000254480,9606.ENSP00000256442,9606.ENSP00000264995,9606.ENSP00000269886,9606.ENSP00000286614,9606.ENSP00000287675,9606.ENSP00000287934,9606.ENSP00000288207,9606.ENSP00000296503,9606.ENSP00000296577,9606.ENSP00000300093,9606.ENSP00000322788,9606.ENSP00000344504,9606.ENSP00000345347,9606.ENSP00000361298,9606.ENSP00000362036,9606.ENSP00000377486,9606.ENSP00000384620,9606.ENSP00000411532,…
GO Process	GO:0006284	Base-excision repair	0.0134	6	41	UNG,FEN1,DNA2,APEX2,PCNA,POLD1	9606.ENSP00000242576,9606.ENSP00000305480,9606.ENSP00000351185,9606.ENSP00000364126,9606.ENSP00000368458,9606.ENSP00000406046
GO Process	GO:0006417	Regulation of translation	0.0135	20	398	HNRNPL,FASTKD2,DHX29,NAT10,CDK4,LRPPRC,ZFP36L2,EIF5B,GTPBP2,KHDRBS1,NCL,PUS7,PTBP1,PASK,EIF2B3,EIF3A,KIAA0020,NOLC1,HNRNPLL,WBSCR16	9606.ENSP00000221419,9606.ENSP00000236980,9606.ENSP00000251636,9606.ENSP00000257829,9606.ENSP00000257904,9606.ENSP00000260665,9606.ENSP00000282388,9606.ENSP00000289371,9606.ENSP00000303997,9606.ENSP00000313829,9606.ENSP00000318195,9606.ENSP00000348722,9606.ENSP00000349428,9606.ENSP00000351475,9606.ENSP00000353575,9606.ENSP00000358140,9606.ENSP00000380982,9606.ENSP00000385410,9606.ENSP00000390625,…
GO Process	GO:0008283	Cell population proliferation	0.0137	23	493	GINS1,NBN,MMP16,BAX,BUB1,CDC25A,MCM7,ATAD5,IMPDH2,CDC25C,CUL1,KIF14,ASPM,NES,ASCC3,PAK1IP1,HELLS,POLR3G,NRG1,GNL3,FIGNL1,MCM10,E2F8	9606.ENSP00000262460,9606.ENSP00000265433,9606.ENSP00000286614,9606.ENSP00000293288,9606.ENSP00000302530,9606.ENSP00000303706,9606.ENSP00000307288,9606.ENSP00000313171,9606.ENSP00000321584,9606.ENSP00000321656,9606.ENSP00000326804,9606.ENSP00000356319,9606.ENSP00000356379,9606.ENSP00000357206,9606.ENSP00000358159,9606.ENSP00000368887,9606.ENSP00000377601,9606.ENSP00000382058,9606.ENSP00000384620,…
GO Process	GO:0007017	Microtubule-based process	0.0139	30	727	AURKA,FBXO5,DLGAP5,CCNB1,LRPPRC,CENPE,NUF2,HAUS1,HNRNPU,PLK1,BIRC5,TMEM201,XRCC2,PCNT,NEK2,KIF14,ASPM,PSRC1,BLOC1S2,KIF2C,CNTROB,PRC1,KIF20A,ODF2,FIGNL1,BRCA1,CKAP5,SLC16A1,GAS2L3,TUBGCP5	9606.ENSP00000216911,9606.ENSP00000229758,9606.ENSP00000247191,9606.ENSP00000256442,9606.ENSP00000260665,9606.ENSP00000265148,9606.ENSP00000271452,9606.ENSP00000282058,9606.ENSP00000283179,9606.ENSP00000300093,9606.ENSP00000301633,9606.ENSP00000344503,9606.ENSP00000352271,9606.ENSP00000352572,9606.ENSP00000355966,9606.ENSP00000356319,9606.ENSP00000356379,9606.ENSP00000358925,9606.ENSP00000359398,…
GO Process	GO:0051246	Regulation of protein metabolic process	0.0143	84	2828	CAMKK1,CDC6,AURKA,HNRNPL,CAV2,KITLG,FBXO5,FASTKD2,CDC25B,DLGAP5,KLF2,DHX29,SMARCC1,CCNB1,IRAK2,NAT10,CDK4,LRPPRC,EED,CENPE,NBN,PM20D2,ZFP36L2,FZD1,CCNB2,EIF5B,BAX,PLK1,BIRC5,CDC25A,GTPBP2,ARL6IP1,CLSPN,KHDRBS1,TLK2,NCL,F2R,CDC25C,DBF4B,STK25,PMAIP1,NDNL2,COL7A1,CDKN3,HMGB1,SVIP,PRKAA1,PUS7,PTBP1,PASK,MAP3K5,EIF2B3,IQGAP3,SH3BP5L,DTL,KIF14,EIF3A,PSRC1,JUN,HNRNPK,CDKN2D,PTTG1,CCNF,KIAA0020,PAXIP1,P…	9606.ENSP00000158166,9606.ENSP00000209728,9606.ENSP00000216911,9606.ENSP00000221419,9606.ENSP00000222693,9606.ENSP00000228280,9606.ENSP00000229758,9606.ENSP00000236980,9606.ENSP00000245960,9606.ENSP00000247191,9606.ENSP00000248071,9606.ENSP00000251636,9606.ENSP00000254480,9606.ENSP00000256442,9606.ENSP00000256458,9606.ENSP00000257829,9606.ENSP00000257904,9606.ENSP00000260665,9606.ENSP00000263360,…
GO Process	GO:0070317	Negative regulation of g0 to g1 transition	0.0165	6	43	EED,E2F1,TFDP1,RBBP8,CHEK1,BRCA1	9606.ENSP00000263360,9606.ENSP00000345571,9606.ENSP00000364519,9606.ENSP00000382628,9606.ENSP00000388648,9606.ENSP00000418960
GO Process	GO:0097190	Apoptotic signaling pathway	0.0171	16	286	KITLG,MSH2,MSH6,NBN,BAX,ATAD5,STK25,PMAIP1,CUL1,E2F1,MAP3K5,E2F2,MLLT11,BLOC1S2,JUN,BRCA1	9606.ENSP00000228280,9606.ENSP00000233146,9606.ENSP00000234420,9606.ENSP00000265433,9606.ENSP00000293288,9606.ENSP00000313171,9606.ENSP00000325748,9606.ENSP00000326119,9606.ENSP00000326804,9606.ENSP00000345571,9606.ENSP00000351908,9606.ENSP00000355249,9606.ENSP00000357917,9606.ENSP00000359398,9606.ENSP00000360266,9606.ENSP00000418960
GO Process	GO:0022414	Reproductive process	0.0179	48	1400	AURKA,KITLG,FBXO5,MSH2,MSH6,CDC25B,SMARCC1,NASP,CCNB1,BRIP1,PPAT,NBN,NUF2,BAX,HMGB2,RAD21,PLK1,BUB1,CBX2,SLC19A1,KHDRBS1,RMI1,BASP1,E2F7,NCAPD2,WDR33,SPIN4,E2F1,XRCC2,EXO1,NEK2,ASPM,RAD54L,PCNA,LHFPL2,SDC1,PTTG1,CCNF,RBBP8,PSME4,ODF2,FIGNL1,TOP2A,PVRL3,CCNE2,MYBL1,TUBGCP5,E2F8	9606.ENSP00000216911,9606.ENSP00000228280,9606.ENSP00000229758,9606.ENSP00000233146,9606.ENSP00000234420,9606.ENSP00000245960,9606.ENSP00000254480,9606.ENSP00000255120,9606.ENSP00000256442,9606.ENSP00000259008,9606.ENSP00000264220,9606.ENSP00000265433,9606.ENSP00000271452,9606.ENSP00000293288,9606.ENSP00000296503,9606.ENSP00000297338,9606.ENSP00000300093,9606.ENSP00000302530,9606.ENSP00000308750,…
GO Process	GO:1902369	Negative regulation of rna catabolic process	0.021	7	64	FUS,LRPPRC,NAF1,HNRNPU,E2F1,HNRNPC,TAF15	9606.ENSP00000254108,9606.ENSP00000260665,9606.ENSP00000274054,9606.ENSP00000283179,9606.ENSP00000345571,9606.ENSP00000451291,9606.ENSP00000474096
GO Process	GO:0032774	RNA biosynthetic process	0.0221	25	579	NR3C1,CCNB1,CDK4,BAX,C10orf2,WDR33,CSTF2T,GTF2F2,E2F1,POLR3H,PRIM1,E2F2,TFB2M,PARP1,INTS7,RBMX,JUN,TFDP1,PTTG1,POLR3G,SLBP,GTF2H3,POLRMT,TAF15,PRIM2	9606.ENSP00000231509,9606.ENSP00000256442,9606.ENSP00000257904,9606.ENSP00000293288,9606.ENSP00000309595,9606.ENSP00000325377,9606.ENSP00000332444,9606.ENSP00000340823,9606.ENSP00000345571,9606.ENSP00000347345,9606.ENSP00000350491,9606.ENSP00000355249,9606.ENSP00000355471,9606.ENSP00000355759,9606.ENSP00000355961,9606.ENSP00000359645,9606.ENSP00000360266,9606.ENSP00000364519,9606.ENSP00000377536,…
GO Process	GO:0006309	Apoptotic dna fragmentation	0.0226	4	16	EXOG,HMGB2,H1F0,HMGB1	9606.ENSP00000287675,9606.ENSP00000296503,9606.ENSP00000344504,9606.ENSP00000345347
GO Process	GO:0006513	Protein monoubiquitination	0.0226	7	65	DDB2,RAD18,CUL1,DTL,ATXN7L3,NEDD4,UHRF1	9606.ENSP00000256996,9606.ENSP00000264926,9606.ENSP00000326804,9606.ENSP00000355958,9606.ENSP00000397259,9606.ENSP00000424827,9606.ENSP00000479617
GO Process	GO:0046831	Regulation of rna export from nucleus	0.0226	4	16	CPSF6,RIOK2,KHDRBS1,NUP153	9606.ENSP00000266679,9606.ENSP00000283109,9606.ENSP00000313829,9606.ENSP00000444029
GO Process	GO:0090306	Spindle assembly involved in meiosis	0.0229	3	6	AURKA,FBXO5,ASPM	9606.ENSP00000216911,9606.ENSP00000229758,9606.ENSP00000356379
GO Process	GO:0007143	Female meiotic nuclear division	0.0234	5	30	AURKA,FBXO5,CDC25B,PLK1,TOP2A	9606.ENSP00000216911,9606.ENSP00000229758,9606.ENSP00000245960,9606.ENSP00000300093,9606.ENSP00000411532
GO Process	GO:0045132	Meiotic chromosome segregation	0.0245	8	87	BRIP1,NUF2,PLK1,BUB1,RMI1,PTTG1,TOP2A,CCNE2	9606.ENSP00000259008,9606.ENSP00000271452,9606.ENSP00000300093,9606.ENSP00000302530,9606.ENSP00000317039,9606.ENSP00000377536,9606.ENSP00000411532,9606.ENSP00000429089
GO Process	GO:0051225	Spindle assembly	0.0262	8	88	AURKA,FBXO5,HAUS1,BIRC5,NEK2,ASPM,PRC1,TUBGCP5	9606.ENSP00000216911,9606.ENSP00000229758,9606.ENSP00000282058,9606.ENSP00000301633,9606.ENSP00000355966,9606.ENSP00000356379,9606.ENSP00000377793,9606.ENSP00000480316
GO Process	GO:0034248	Regulation of cellular amide metabolic process	0.0269	21	456	HNRNPL,FASTKD2,DHX29,NAT10,CDK4,LRPPRC,ZFP36L2,EIF5B,GTPBP2,KHDRBS1,NCL,PRKAA1,PUS7,PTBP1,PASK,EIF2B3,EIF3A,KIAA0020,NOLC1,HNRNPLL,WBSCR16	9606.ENSP00000221419,9606.ENSP00000236980,9606.ENSP00000251636,9606.ENSP00000257829,9606.ENSP00000257904,9606.ENSP00000260665,9606.ENSP00000282388,9606.ENSP00000289371,9606.ENSP00000303997,9606.ENSP00000313829,9606.ENSP00000318195,9606.ENSP00000346148,9606.ENSP00000348722,9606.ENSP00000349428,9606.ENSP00000351475,9606.ENSP00000353575,9606.ENSP00000358140,9606.ENSP00000380982,9606.ENSP00000385410,…
GO Process	GO:0030490	Maturation of ssu-rrna	0.0294	6	49	NAT10,UTP20,RIOK2,WDR3,CIRH1A,RPP40	9606.ENSP00000257829,9606.ENSP00000261637,9606.ENSP00000283109,9606.ENSP00000308179,9606.ENSP00000327179,9606.ENSP00000369391
GO Process	GO:0031297	Replication fork processing	0.0298	5	32	MMS22L,DNA2,PCNA,TONSL,DDX11	9606.ENSP00000275053,9606.ENSP00000351185,9606.ENSP00000368458,9606.ENSP00000386239,9606.ENSP00000440402
GO Process	GO:0032268	Regulation of cellular protein metabolic process	0.0298	79	2693	CAMKK1,CDC6,AURKA,HNRNPL,CAV2,KITLG,FBXO5,FASTKD2,CDC25B,DLGAP5,DHX29,SMARCC1,CCNB1,IRAK2,NAT10,CDK4,LRPPRC,EED,CENPE,NBN,PM20D2,ZFP36L2,FZD1,CCNB2,EIF5B,BAX,PLK1,BIRC5,CDC25A,GTPBP2,ARL6IP1,CLSPN,KHDRBS1,TLK2,NCL,F2R,CDC25C,DBF4B,STK25,PMAIP1,NDNL2,COL7A1,CDKN3,HMGB1,SVIP,PRKAA1,PUS7,PTBP1,PASK,MAP3K5,EIF2B3,IQGAP3,SH3BP5L,KIF14,EIF3A,PSRC1,JUN,CDKN2D,PTTG1,CCNF,KIAA0020,PAXIP1,PSME4,NRG1,NOLC1,…	9606.ENSP00000158166,9606.ENSP00000209728,9606.ENSP00000216911,9606.ENSP00000221419,9606.ENSP00000222693,9606.ENSP00000228280,9606.ENSP00000229758,9606.ENSP00000236980,9606.ENSP00000245960,9606.ENSP00000247191,9606.ENSP00000251636,9606.ENSP00000254480,9606.ENSP00000256442,9606.ENSP00000256458,9606.ENSP00000257829,9606.ENSP00000257904,9606.ENSP00000260665,9606.ENSP00000263360,9606.ENSP00000265148,…
GO Process	GO:0050685	Positive regulation of mrna processing	0.0298	5	32	CCNB1,TRA2A,NCL,RBMX,SNRNP70	9606.ENSP00000256442,9606.ENSP00000297071,9606.ENSP00000318195,9606.ENSP00000359645,9606.ENSP00000472998
GO Process	GO:0044806	G-quadruplex DNA unwinding	0.0313	3	7	HNRNPA2B1,DNA2,DDX11	9606.ENSP00000346694,9606.ENSP00000351185,9606.ENSP00000440402
GO Process	GO:0060717	Chorion development	0.0313	3	7	E2F7,PAXIP1,E2F8	9606.ENSP00000323246,9606.ENSP00000384048,9606.ENSP00000481103
GO Process	GO:0051383	Kinetochore organization	0.0316	4	18	CENPE,NUF2,CDT1,CENPF	9606.ENSP00000265148,9606.ENSP00000271452,9606.ENSP00000301019,9606.ENSP00000355922
GO Process	GO:0042274	Ribosomal small subunit biogenesis	0.0325	7	70	NAT10,UTP20,RIOK2,WDR3,CIRH1A,SURF6,RPP40	9606.ENSP00000257829,9606.ENSP00000261637,9606.ENSP00000283109,9606.ENSP00000308179,9606.ENSP00000327179,9606.ENSP00000361092,9606.ENSP00000369391
GO Process	GO:0043549	Regulation of kinase activity	0.0334	34	918	CAMKK1,CDC6,KITLG,CDC25B,CCNB1,IRAK2,CDK4,CENPE,NBN,HNRNPU,CCNB2,PLK1,CDC25A,CLSPN,F2R,CDC25C,DBF4B,STK25,CDKN3,PRKAA1,MAP3K5,IQGAP3,SH3BP5L,KIF14,PSRC1,RBL1,CDKN2D,CCNF,NRG1,PILRB,CDK12,PDGFC,CCNE2,BORA	9606.ENSP00000158166,9606.ENSP00000209728,9606.ENSP00000228280,9606.ENSP00000245960,9606.ENSP00000256442,9606.ENSP00000256458,9606.ENSP00000257904,9606.ENSP00000265148,9606.ENSP00000265433,9606.ENSP00000283179,9606.ENSP00000288207,9606.ENSP00000300093,9606.ENSP00000303706,9606.ENSP00000312995,9606.ENSP00000321326,9606.ENSP00000321656,9606.ENSP00000323663,9606.ENSP00000325748,9606.ENSP00000335357,…
GO Process	GO:0006333	Chromatin assembly or disassembly	0.0341	12	193	SMARCC1,NASP,MCM2,HMGB2,CHAF1A,CHAF1B,H1FX,CENPQ,H1F0,HELLS,BEND3,NAP1L1	9606.ENSP00000254480,9606.ENSP00000255120,9606.ENSP00000265056,9606.ENSP00000296503,9606.ENSP00000301280,9606.ENSP00000315700,9606.ENSP00000329662,9606.ENSP00000337289,9606.ENSP00000344504,9606.ENSP00000377601,9606.ENSP00000411268,9606.ENSP00000477538
GO Process	GO:0032206	Positive regulation of telomere maintenance	0.0345	6	51	NBN,NAF1,HNRNPA1,HNRNPA2B1,NEK2,GNL3	9606.ENSP00000265433,9606.ENSP00000274054,9606.ENSP00000341826,9606.ENSP00000346694,9606.ENSP00000355966,9606.ENSP00000395772
GO Process	GO:0072332	Intrinsic apoptotic signaling pathway by p53 class mediator	0.0345	6	51	MSH2,BAX,ATAD5,PMAIP1,E2F1,E2F2	9606.ENSP00000233146,9606.ENSP00000293288,9606.ENSP00000313171,9606.ENSP00000326119,9606.ENSP00000345571,9606.ENSP00000355249
GO Process	GO:0045859	Regulation of protein kinase activity	0.0348	31	812	CAMKK1,CDC6,KITLG,CDC25B,CCNB1,IRAK2,CDK4,CENPE,CCNB2,PLK1,CDC25A,CLSPN,F2R,CDC25C,DBF4B,STK25,CDKN3,PRKAA1,MAP3K5,IQGAP3,SH3BP5L,KIF14,PSRC1,CDKN2D,CCNF,NRG1,PILRB,CDK12,PDGFC,CCNE2,BORA	9606.ENSP00000158166,9606.ENSP00000209728,9606.ENSP00000228280,9606.ENSP00000245960,9606.ENSP00000256442,9606.ENSP00000256458,9606.ENSP00000257904,9606.ENSP00000265148,9606.ENSP00000288207,9606.ENSP00000300093,9606.ENSP00000303706,9606.ENSP00000312995,9606.ENSP00000321326,9606.ENSP00000321656,9606.ENSP00000323663,9606.ENSP00000325748,9606.ENSP00000335357,9606.ENSP00000346148,9606.ENSP00000351908,…
GO Process	GO:0000460	Maturation of 5.8s rrna	0.0369	5	34	UTP20,RRP15,EXOSC9,RPP40,URB1	9606.ENSP00000261637,9606.ENSP00000355899,9606.ENSP00000368984,9606.ENSP00000369391,9606.ENSP00000372199
GO Process	GO:0009168	Purine ribonucleoside monophosphate biosynthetic process	0.0369	4	19	PPAT,IMPDH2,GART,GMPS	9606.ENSP00000264220,9606.ENSP00000321584,9606.ENSP00000371253,9606.ENSP00000419851
GO Process	GO:0031935	Regulation of chromatin silencing	0.0369	4	19	ATAD2,H1FX,H1F0,CDC45	9606.ENSP00000287394,9606.ENSP00000329662,9606.ENSP00000344504,9606.ENSP00000405726
GO Process	GO:0043489	RNA stabilization	0.037	6	52	FUS,NAF1,HNRNPU,E2F1,HNRNPC,TAF15	9606.ENSP00000254108,9606.ENSP00000274054,9606.ENSP00000283179,9606.ENSP00000345571,9606.ENSP00000451291,9606.ENSP00000474096
GO Process	GO:0048146	Positive regulation of fibroblast proliferation	0.037	6	52	CDC6,CCNB1,CDK4,E2F1,JUN,PDGFC	9606.ENSP00000209728,9606.ENSP00000256442,9606.ENSP00000257904,9606.ENSP00000345571,9606.ENSP00000360266,9606.ENSP00000422464
GO Process	GO:0097711	Ciliary basal body-plasma membrane docking	0.039	8	95	CEP164,HAUS1,PLK1,PCNT,NEK2,CNTRL,ODF2,CKAP5	9606.ENSP00000278935,9606.ENSP00000282058,9606.ENSP00000300093,9606.ENSP00000352572,9606.ENSP00000355966,9606.ENSP00000362962,9606.ENSP00000403453,9606.ENSP00000432768
GO Process	GO:0000381	Regulation of alternative mrna splicing, via spliceosome	0.0392	7	73	HNRNPL,HNRNPU,KHDRBS1,HNRNPA1,PTBP1,RBMX,SRSF10	9606.ENSP00000221419,9606.ENSP00000283179,9606.ENSP00000313829,9606.ENSP00000341826,9606.ENSP00000349428,9606.ENSP00000359645,9606.ENSP00000420195
GO Process	GO:0007144	Female meiosis i	0.0402	3	8	AURKA,FBXO5,CDC25B	9606.ENSP00000216911,9606.ENSP00000229758,9606.ENSP00000245960
GO Process	GO:0032075	Positive regulation of nuclease activity	0.0402	3	8	HMGB2,PCNA,DDX11	9606.ENSP00000296503,9606.ENSP00000368458,9606.ENSP00000440402
GO Process	GO:0046833	Positive regulation of rna export from nucleus	0.0402	3	8	CPSF6,RIOK2,KHDRBS1	9606.ENSP00000266679,9606.ENSP00000283109,9606.ENSP00000313829
GO Process	GO:0051299	Centrosome separation	0.0402	3	8	AURKA,NEK2,CNTROB	9606.ENSP00000216911,9606.ENSP00000355966,9606.ENSP00000369614
GO Process	GO:1902275	Regulation of chromatin organization	0.0402	12	198	CCNB1,EED,HNRNPU,ATAD2,TLK2,H1FX,H1F0,PAXIP1,CHEK1,CDC45,BRCA1,PHF19	9606.ENSP00000256442,9606.ENSP00000263360,9606.ENSP00000283179,9606.ENSP00000287394,9606.ENSP00000316512,9606.ENSP00000329662,9606.ENSP00000344504,9606.ENSP00000384048,9606.ENSP00000388648,9606.ENSP00000405726,9606.ENSP00000418960,9606.ENSP00000483946
GO Process	GO:0045892	Negative regulation of transcription, dna-templated	0.0417	43	1273	ERF,NR3C1,PRRX1,KLF2,EED,ZNF215,HNRNPU,FZD1,CIART,HMGB2,PLK1,BIRC5,CBX2,KHDRBS1,BASP1,E2F7,MTDH,H1F0,HMGB1,E2F1,HNRNPA2B1,DLX1,E2F2,IRF2BP2,PARP1,CENPF,JUN,RBL1,PCNA,RFC1,HELLS,CBX6,NRG1,MXD3,BEND3,BAP1,BRCA1,NEDD4,SAMD1,RITA1,DPF3,UHRF1,E2F8	9606.ENSP00000222329,9606.ENSP00000231509,9606.ENSP00000239461,9606.ENSP00000248071,9606.ENSP00000263360,9606.ENSP00000278319,9606.ENSP00000283179,9606.ENSP00000287934,9606.ENSP00000290363,9606.ENSP00000296503,9606.ENSP00000300093,9606.ENSP00000301633,9606.ENSP00000308750,9606.ENSP00000313829,9606.ENSP00000319281,9606.ENSP00000323246,9606.ENSP00000338235,9606.ENSP00000344504,9606.ENSP00000345347,…
GO Process	GO:0031497	Chromatin assembly	0.042	11	172	NASP,MCM2,HMGB2,CHAF1A,CHAF1B,H1FX,CENPQ,H1F0,HELLS,BEND3,NAP1L1	9606.ENSP00000255120,9606.ENSP00000265056,9606.ENSP00000296503,9606.ENSP00000301280,9606.ENSP00000315700,9606.ENSP00000329662,9606.ENSP00000337289,9606.ENSP00000344504,9606.ENSP00000377601,9606.ENSP00000411268,9606.ENSP00000477538
GO Process	GO:0033120	Positive regulation of rna splicing	0.0445	5	36	TRA2A,NCL,RBMX,HNRNPLL,SNRNP70	9606.ENSP00000297071,9606.ENSP00000318195,9606.ENSP00000359645,9606.ENSP00000390625,9606.ENSP00000472998
GO Process	GO:0012501	Programmed cell death	0.0478	37	1054	KITLG,NR3C1,MSH2,MSH6,MCM2,NBN,EXOG,BAX,HMGB2,RAD21,BIRC5,BUB1,ARL6IP1,CDCA7,ATAD5,STK25,PMAIP1,CUL1,H1F0,HMGB1,E2F1,MAP3K5,NAE1,E2F2,PARP1,MLLT11,SMNDC1,BLOC1S2,JUN,TFDP1,CIT,CDKN2D,CHEK1,TOP2A,BRCA1,API5,TRAF3	9606.ENSP00000228280,9606.ENSP00000231509,9606.ENSP00000233146,9606.ENSP00000234420,9606.ENSP00000265056,9606.ENSP00000265433,9606.ENSP00000287675,9606.ENSP00000293288,9606.ENSP00000296503,9606.ENSP00000297338,9606.ENSP00000301633,9606.ENSP00000302530,9606.ENSP00000306788,9606.ENSP00000306968,9606.ENSP00000313171,9606.ENSP00000325748,9606.ENSP00000326119,9606.ENSP00000326804,9606.ENSP00000344504,…
GO Process	GO:0034728	Nucleosome organization	0.0496	11	176	SMARCC1,NASP,MCM2,HMGB2,CHAF1A,CHAF1B,H1FX,CENPQ,H1F0,PSME4,NAP1L1	9606.ENSP00000254480,9606.ENSP00000255120,9606.ENSP00000265056,9606.ENSP00000296503,9606.ENSP00000301280,9606.ENSP00000315700,9606.ENSP00000329662,9606.ENSP00000337289,9606.ENSP00000344504,9606.ENSP00000384211,9606.ENSP00000477538
GO Process	GO:0051130	Positive regulation of cellular component organization	0.0498	41	1209	AURKA,DLGAP5,CCNB1,DDB2,MESDC2,EED,NBN,SH3GL1,NAF1,HNRNPU,FZD1,BAX,RAD21,CDT1,BIRC5,FEN1,MMP1,STK25,PMAIP1,HNRNPA1,E2F1,PRKAA1,HNRNPA2B1,PARP1,NEK2,NES,MLLT11,PSRC1,TFDP1,HNRNPK,SDC1,FSCN1,PAXIP1,NRG1,GNL3,BAP1,BRCA1,CKAP5,DDX11,GTF2H3,PHF19	9606.ENSP00000216911,9606.ENSP00000247191,9606.ENSP00000256442,9606.ENSP00000256996,9606.ENSP00000261758,9606.ENSP00000263360,9606.ENSP00000265433,9606.ENSP00000269886,9606.ENSP00000274054,9606.ENSP00000283179,9606.ENSP00000287934,9606.ENSP00000293288,9606.ENSP00000297338,9606.ENSP00000301019,9606.ENSP00000301633,9606.ENSP00000305480,9606.ENSP00000322788,9606.ENSP00000325748,9606.ENSP00000326119,…
GO Function	GO:0003676	Nucleic acid binding	1.69e-22	176	3947	TARBP1,CDC6,MCM5,POLE2,HNRNPL,ERF,FRG1,NR3C1,RRP9,MSH2,MSH6,FASTKD2,PRRX1,UNG,SNRPA,KLF2,DHX29,FUS,SMARCC1,DDB2,NAT10,BRIP1,LRPPRC,PPIG,LOC81691,RNF138,UTP20,TIPIN,MCM4,EED,WDR76,MCM6,RAD18,MRPL3,MCM2,NBN,HNRNPH3,SLC2A4RG,CPSF6,NAF1,ZNF215,FARSB,ZFP36L2,HNRNPU,TSEN2,EXOG,EIF5B,CIART,HMGB2,TRA2A,NOL6,CDT1,HNRNPUL2,GTPBP2,FEN1,MCM7,WDR3,CBX2,C10orf2,RMI2,CLSPN,ATAD5,KHDRBS1,SNRNP200,NCL,BASP1,IMPDH…	9606.ENSP00000040877,9606.ENSP00000209728,9606.ENSP00000216122,9606.ENSP00000216367,9606.ENSP00000221419,9606.ENSP00000222329,9606.ENSP00000226798,9606.ENSP00000231509,9606.ENSP00000232888,9606.ENSP00000233146,9606.ENSP00000234420,9606.ENSP00000236980,9606.ENSP00000239461,9606.ENSP00000242576,9606.ENSP00000243563,9606.ENSP00000248071,9606.ENSP00000251636,9606.ENSP00000254108,9606.ENSP00000254480,…
GO Function	GO:0097159	Organic cyclic compound binding	7.71e-19	216	5916	TARBP1,CAMKK1,CDC6,MCM5,POLE2,AURKA,HNRNPL,ERF,FRG1,NR3C1,RRP9,MSH2,MSH6,FASTKD2,PRRX1,UNG,SNRPA,KLF2,DHX29,FUS,SMARCC1,IRAK2,DDB2,NAT10,CDK4,BRIP1,LRPPRC,PPIG,LOC81691,RNF138,UTP20,MPP5,TIPIN,MCM4,EED,WDR76,MCM6,RAD18,MRPL3,MCM2,CENPE,NBN,HNRNPH3,SLC2A4RG,CPSF6,NAF1,ZNF215,FARSB,ZFP36L2,RIOK2,HNRNPU,TSEN2,DCK,ATAD2,EXOG,EIF5B,CIART,HMGB2,ABCE1,TRA2A,NOL6,PLK1,CDT1,HNRNPUL2,BUB1,MAT2A,GTPBP2,FEN1…	9606.ENSP00000040877,9606.ENSP00000158166,9606.ENSP00000209728,9606.ENSP00000216122,9606.ENSP00000216367,9606.ENSP00000216911,9606.ENSP00000221419,9606.ENSP00000222329,9606.ENSP00000226798,9606.ENSP00000231509,9606.ENSP00000232888,9606.ENSP00000233146,9606.ENSP00000234420,9606.ENSP00000236980,9606.ENSP00000239461,9606.ENSP00000242576,9606.ENSP00000243563,9606.ENSP00000248071,9606.ENSP00000251636,…
GO Function	GO:1901363	Heterocyclic compound binding	7.71e-19	214	5831	TARBP1,CAMKK1,CDC6,MCM5,POLE2,AURKA,HNRNPL,ERF,FRG1,NR3C1,RRP9,MSH2,MSH6,FASTKD2,PRRX1,UNG,SNRPA,KLF2,DHX29,FUS,SMARCC1,IRAK2,DDB2,NAT10,CDK4,BRIP1,LRPPRC,PPIG,LOC81691,RNF138,UTP20,MPP5,TIPIN,MCM4,EED,WDR76,MCM6,RAD18,MRPL3,MCM2,CENPE,NBN,HNRNPH3,SLC2A4RG,CPSF6,NAF1,ZNF215,FARSB,ZFP36L2,RIOK2,HNRNPU,TSEN2,DCK,ATAD2,EXOG,EIF5B,CIART,HMGB2,ABCE1,TRA2A,NOL6,PLK1,CDT1,HNRNPUL2,BUB1,MAT2A,GTPBP2,FEN1…	9606.ENSP00000040877,9606.ENSP00000158166,9606.ENSP00000209728,9606.ENSP00000216122,9606.ENSP00000216367,9606.ENSP00000216911,9606.ENSP00000221419,9606.ENSP00000222329,9606.ENSP00000226798,9606.ENSP00000231509,9606.ENSP00000232888,9606.ENSP00000233146,9606.ENSP00000234420,9606.ENSP00000236980,9606.ENSP00000239461,9606.ENSP00000242576,9606.ENSP00000243563,9606.ENSP00000248071,9606.ENSP00000251636,…
GO Function	GO:0003723	RNA binding	1.05e-15	93	1649	TARBP1,HNRNPL,FRG1,NR3C1,RRP9,FASTKD2,SNRPA,DHX29,FUS,NAT10,LRPPRC,PPIG,LOC81691,UTP20,MRPL3,HNRNPH3,CPSF6,NAF1,FARSB,ZFP36L2,HNRNPU,EIF5B,HMGB2,TRA2A,NOL6,HNRNPUL2,GTPBP2,WDR3,KHDRBS1,SNRNP200,NCL,IMPDH2,WDR33,CIRH1A,H1FX,CSTF2T,MTDH,ZNF326,HNRNPA1,SRP72,H1F0,HMGB1,HNRNPA2B1,CGI-74,PUS7,HNRNPH1,PTBP1,DNA2,EIF2B3,TFB2M,PARP1,EIF3A,ASCC3,SMNDC1,RBMX,JUN,NOC3L,SURF6,GNL2,HNRNPK,EXOSC9,RPP40,FSCN1,U…	9606.ENSP00000040877,9606.ENSP00000221419,9606.ENSP00000226798,9606.ENSP00000231509,9606.ENSP00000232888,9606.ENSP00000236980,9606.ENSP00000243563,9606.ENSP00000251636,9606.ENSP00000254108,9606.ENSP00000257829,9606.ENSP00000260665,9606.ENSP00000260970,9606.ENSP00000261377,9606.ENSP00000261637,9606.ENSP00000264995,9606.ENSP00000265866,9606.ENSP00000266679,9606.ENSP00000274054,9606.ENSP00000281828,…
GO Function	GO:0005488	Binding	1.45e-13	333	12516	RALBP1,MRI1,TARBP1,CAMKK1,CDC6,TIMM13,MCM5,POLE2,AURKA,HNRNPL,PLIN3,ERF,CAV2,FRG1,KITLG,FBXO5,NR3C1,RRP9,MSH2,MSH6,FASTKD2,PRRX1,UNG,SNRPA,CDC25B,YEATS4,KLF2,DHX29,SNX4,FUS,SMARCC1,NASP,CCNB1,IRAK2,DDB2,NAT10,CDK4,USP37,RSAD1,TEX2,BRIP1,RANBP6,ARHGAP29,LRPPRC,PPIG,LOC81691,RNF138,UTP20,MPP5,MESDC2,TIPIN,MCM4,EED,WDR76,MCM6,PPAT,RAD18,MRPL3,MCM2,CENPE,NBN,HNRNPH3,SLC2A4RG,CPSF6,CDH11,TRIM65,SH3GL1…	9606.ENSP00000019317,9606.ENSP00000040663,9606.ENSP00000040877,9606.ENSP00000158166,9606.ENSP00000209728,9606.ENSP00000215570,9606.ENSP00000216122,9606.ENSP00000216367,9606.ENSP00000216911,9606.ENSP00000221419,9606.ENSP00000221957,9606.ENSP00000222329,9606.ENSP00000222693,9606.ENSP00000226798,9606.ENSP00000228280,9606.ENSP00000229758,9606.ENSP00000231509,9606.ENSP00000232888,9606.ENSP00000233146,…
GO Function	GO:0003677	DNA binding	1.76e-13	113	2470	CDC6,MCM5,POLE2,HNRNPL,ERF,NR3C1,MSH2,MSH6,PRRX1,UNG,KLF2,FUS,SMARCC1,DDB2,BRIP1,LRPPRC,RNF138,TIPIN,MCM4,EED,WDR76,MCM6,RAD18,MCM2,NBN,SLC2A4RG,ZNF215,ZFP36L2,HNRNPU,CIART,HMGB2,CDT1,FEN1,MCM7,CBX2,C10orf2,RMI2,CLSPN,ATAD5,KHDRBS1,NCL,BASP1,IMPDH2,DSCC1,E2F7,PIF1,H1FX,C17orf70,ZNF326,GTF2F2,HNRNPA1,LIN54,H1F0,PTGES2,HMGB1,E2F1,HNRNPA2B1,POLR3H,PRIM1,DNA2,XRCC2,WDHD1,DLX1,FAN1,E2F2,EXO1,PARP1,DCL…	9606.ENSP00000209728,9606.ENSP00000216122,9606.ENSP00000216367,9606.ENSP00000221419,9606.ENSP00000222329,9606.ENSP00000231509,9606.ENSP00000233146,9606.ENSP00000234420,9606.ENSP00000239461,9606.ENSP00000242576,9606.ENSP00000248071,9606.ENSP00000254108,9606.ENSP00000254480,9606.ENSP00000256996,9606.ENSP00000259008,9606.ENSP00000260665,9606.ENSP00000261593,9606.ENSP00000261881,9606.ENSP00000262105,…
[truncated: 644 more rows]

## Sheet: Rhythmic w MESOR Increased
STRINGoutput_Genes rhythmic (weighted BIC > 0.75) in young and old with mesor increased (q < 0.05)
#category	term ID	term description	false discovery rate	observed gene count	background gene count	matching proteins in your network (labels)	matching proteins in your network (IDs)
[truncated: 272 more rows]

## Sheet: Rhythmic w Phase Advanced
STRINGoutput_Genes rhythmic (weighted BIC > 0.75) in young and old with phase advanced (q < 0.05)
[truncated: 1 more rows]

## Sheet: Rhythmic w Phase Delayed
STRINGoutput_with phase delayed (q < 0.05)
[truncated: 105 more rows]

## Sheet: Rhythmic in Old not Young
STRINGoutput_Genes rhythmic in old but not in young (weighted BIC > 0.75)
[truncated: 358 more rows]

## Sheet: Rhythmic in Young and Old
STRINGoutput_Genes rhythmic in young and old (weighted BIC > 0.75)
[truncated: 1,040 more rows]

[truncated: 2 more sheets: Rhythmic in Young not Old, Rhythmicity Diff Young vs Old]
