# Supplementary material for: Evidence for a role of human blood-borne factors in mediating age-associated changes in molecular circadian rhythms
Source: eLife. 2024 Nov 1;12:RP88322. doi: 10.7554/eLife.88322 (PMC11530234; doi:10.7554/eLife.88322)
Supplement: Figure 3—source data 2. [file elife-88322-fig3-data2.xlsx]

## Sheet: Venn Diagram Results
Names	total	elements
Decrease in MESOR GOR Increase in MESOR LOR Phase delay	26	YAP1
		T
		RB1
		E2F7
		RFX5
		POLR2B
		RCOR1
		CEBPB
		HIRA
		MYC
		SUMO2
		BRD4
		CTCF
		GTF2I
		MXI1
		NEUROG2
		RBL2
		ERCC6
		SMC3
		TP53
		MAFK
		NFE2L2
		MAZ
		KDM6B
		BHLHE40
		MITF
Decrease in MESOR GOR Increase in MESOR LOR	2	SOX4
		H2AFX
Decrease in MESOR GOR LOR Phase delay	6	GTF2B
		LMNA
		RELA
		SUMO1
		PHF8
		CHD1
GOR Increase in MESOR LOR Phase delay	6	RAD21
		MECP2
		NR2F2
		BRD7
		POU5F1
		NR2C2
Decrease in MESOR Increase in MESOR LOR	1	SOX2
Decrease in MESOR GOR LOR	2	RBL1
		RNF2
Increase in MESOR LOR Phase delay	1	SMAD3
GOR Increase in MESOR Phase delay	1	POLR3D
GOR Increase in MESOR LOR	1	POLR2M
GOR LOR Phase delay	4	ELK1
		UBE2I
		PRKDC
		AR
Decrease in MESOR LOR	2	LMNB1
		ASCL1
Increase in MESOR LOR	1	KLF4
GOR Phase delay	1	SNAPC5
Increase in MESOR	2	SNAPC1
		BDP1
LOR	1	PIAS4
GOR	2	PCGF2
		RING1

## Sheet:  systemic analysis of the Fibro
systemic analysis of the Fibroblast TFs q<0.05
Decrease in MESOR	Increase in MESOR	Phase advance	Phase delay	LOR	GOR
CTCF	CTCF	ND	CTCF	CTCF	CTCF
BRD4	BRD4		BRD4	BRD4	BRD4
RBL2	BHLHE40		TP53	TP53	MXI1
MXI1	POLR2B		POLR2B	POLR2B	TP53
RB1	MAZ		MAZ	MAZ	MAZ
POLR2B	NEUROG2		MXI1	MXI1	POLR2B
TP53	YAP1		ERCC6	T	BHLHE40
MAZ	T		MYC	MECP2	MECP2
BHLHE40	MXI1		BHLHE40	PHF8	ERCC6
E2F7	CEBPB		MECP2	GTF2B	RCOR1
RNF2	TP53		PHF8	RB1	CEBPB
T	NFE2L2		GTF2B	BHLHE40	T
GTF2B	E2F7		SUMO2	RBL2	MITF
RBL1	MITF		NEUROG2	CEBPB	GTF2B
CEBPB	MECP2		RAD21	ERCC6	MYC
SOX4	ERCC6		E2F7	MITF	E2F7
NEUROG2	KDM6B		NR2C2	E2F7	CHD1
ERCC6	SUMO2		SMC3	MYC	PHF8
KDM6B	RAD21		CEBPB	KDM6B	NFE2L2
MITF	POLR3D		T	NEUROG2	NEUROG2
MYC	GTF2I		GTF2I	SOX4	YAP1
GTF2I	MAFK		RBL2	NFE2L2	RAD21
MAFK	POLR2M		MITF	GTF2I	SMC3
H2AFX	NR2F2		ELK1	RCOR1	RBL2
SOX2	MYC		RFX5	AR	SUMO2
PHF8	H2AFX		RCOR1	YAP1	RB1
LMNB1	HIRA		BRD7	SUMO2	PRKDC
SUMO2	KLF4		HIRA	MAFK	RFX5
YAP1	SMC3		RB1	RBL1	KDM6B
HIRA	NR2C2		PRKDC	RAD21	SUMO1
RCOR1	BRD7		YAP1	H2AFX	NR2F2
SMC3	SOX2		LMNA	RELA	MAFK
NFE2L2	POU5F1		SUMO1	HIRA	RELA
RELA	RCOR1		NFE2L2	SMC3	RNF2
SUMO1	RB1		CHD1	BRD7	H2AFX
RFX5	SMAD3		NR2F2	NR2C2	GTF2I
LMNA	SOX4		MAFK	CHD1	AR
ASCL1	RFX5		SNAPC5	SOX2	POU5F1
CHD1	BDP1		KDM6B	RFX5	ELK1
	SNAPC1		SMAD3	PRKDC	NR2C2
	RBL2		POLR3D	RNF2	POLR2M
			UBE2I	LMNB1	SOX4
			RELA	POLR2M	BRD7
			POU5F1	POU5F1	HIRA
			AR	PIAS4	UBE2I
				SUMO1	LMNA
				NR2F2	PCGF2
				ELK1	RING1
				UBE2I	POLR3D
				SMAD3	SNAPC5
				LMNA	RBL1
				KLF4
				ASCL1
Decrease in MESOR	Increase in MESOR	Phase delay	LOR	GOR
ASCL1	BDP1	AR	AR	AR
BHLHE40	BHLHE40	BHLHE40	ASCL1	BHLHE40
BRD4	BRD4	BRD4	BHLHE40	BRD4
CEBPB	BRD7	BRD7	BRD4	BRD7
CHD1	CEBPB	CEBPB	BRD7	CEBPB
CTCF	CTCF	CHD1	CEBPB	CHD1
E2F7	E2F7	CTCF	CHD1	CTCF
ERCC6	ERCC6	E2F7	CTCF	E2F7
GTF2B	GTF2I	ELK1	E2F7	ELK1
GTF2I	H2AFX	ERCC6	ELK1	ERCC6
H2AFX	HIRA	GTF2B	ERCC6	GTF2B
HIRA	KDM6B	GTF2I	GTF2B	GTF2I
KDM6B	KLF4	HIRA	GTF2I	H2AFX
LMNA	MAFK	KDM6B	H2AFX	HIRA
LMNB1	MAZ	LMNA	HIRA	KDM6B
MAFK	MECP2	MAFK	KDM6B	LMNA
MAZ	MITF	MAZ	KLF4	MAFK
MITF	MXI1	MECP2	LMNA	MAZ
MXI1	MYC	MITF	LMNB1	MECP2
MYC	NEUROG2	MXI1	MAFK	MITF
NEUROG2	NFE2L2	MYC	MAZ	MXI1
NFE2L2	NR2C2	NEUROG2	MECP2	MYC
PHF8	NR2F2	NFE2L2	MITF	NEUROG2
POLR2B	POLR2B	NR2C2	MXI1	NFE2L2
RB1	POLR2M	NR2F2	MYC	NR2C2
RBL1	POLR3D	PHF8	NEUROG2	NR2F2
RBL2	POU5F1	POLR2B	NFE2L2	PCGF2
RCOR1	RAD21	POLR3D	NR2C2	PHF8
RELA	RB1	POU5F1	NR2F2	POLR2B
RFX5	RBL2	PRKDC	PHF8	POLR2M
RNF2	RCOR1	RAD21	PIAS4	POLR3D
SMC3	RFX5	RB1	POLR2B	POU5F1
SOX2	SMAD3	RBL2	POLR2M	PRKDC
SOX4	SMC3	RCOR1	POU5F1	RAD21
SUMO1	SNAPC1	RELA	PRKDC	RB1
SUMO2	SOX2	RFX5	RAD21	RBL1
T	SOX4	SMAD3	RB1	RBL2
TP53	SUMO2	SMC3	RBL1	RCOR1
YAP1	T	SNAPC5	RBL2	RELA
	TP53	SUMO1	RCOR1	RFX5
	YAP1	SUMO2	RELA	RING1
		T	RFX5	RNF2
		TP53	RNF2	SMC3
		UBE2I	SMAD3	SNAPC5
		YAP1	SMC3	SOX4
			SOX2	SUMO1
			SOX4	SUMO2
			SUMO1	T
			SUMO2	TP53
			T	UBE2I
			TP53	YAP1
			UBE2I
			YAP1

## Sheet: All Genes w Amplitude Decrease
LISA_All genes with amplitude decreased (q - 0.05)
Rank	sample_id	factor	cell_line	cell_type	tissue	DNase_p_value	ChIP-seq_p_value	H3K27ac_p_value	summary_p_value	q_value
1	70799	TCF7L1	HCT-116	Colon cancer cell	Colon	1.06515e-10	1.03574e-10	1.03574e-10	1.04536e-10	7.22551e-07
2	64420	PRDM12	HEK293	Epithelium	Embryonic Kidney	5.90181e-09	6.18477e-09	6.25754e-09	6.1108e-09	2.11189e-05
3	44492	LMNA	None	Fibroblast	None	5.70804e-06	5.62865e-06	5.62865e-06	5.65487e-06	0.0130288
4	51613	THAP11	HUES64	Embryonic Stem Cell	Embryo	1.02984e-05	1.09246e-05	1.16352e-05	1.09256e-05	0.0188794
5	56251	MYBL2	None	Epithelium	Mammary Gland	2.25002e-05	2.20274e-05	2.16572e-05	2.20562e-05	0.0304905
6	54050	ESR1	T47D	Epithelium	Mammary Gland	3.00795e-05	3.10714e-05	3.10057e-05	3.07121e-05	0.0353804
7	72802	LMNA	None	Fibroblast	None	9.35555e-05	9.16128e-05	9.25794e-05	9.25758e-05	0.0845997
8	64918	IKZF1	K562	Erythroblast	Bone Marrow	0.000106857	6.96741e-05	0.000144352	9.79164e-05	0.0845997
9	73947	ZNF419	293T	None	None	0.000218275	0.00021503	0.000219367	0.000217542	0.165976
10	44693	LANA	iSLK-219	Epithelium	Kidney	0.000245283	0.000260418	0.000247974	0.000251055	0.165976
11	41288	STAT1	None	Monocyte	Blood	0.00121219	0.000105846	0.000921651	0.00026414	0.165976
12	46109	BATF	GM12878	B Lymphocyte	Blood	0.000287298	0.000738939	0.000191823	0.000298593	0.171989
13	73716	KMT2A	SEM	B Lymphocyte	None	0.00162919	0.000211527	0.000270742	0.000332046	0.176546
14	73721	CREBBP	None	B Lymphocyte	Tonsil	0.000761425	0.000289577	0.000670018	0.0004793	0.225728
15	47100	CBFA2T3	CAL-1	Dendritic Cell	None	0.000480225	0.00046138	0.000570075	0.000499674	0.225728
16	64584	RNF2	K562	Erythroblast	Bone Marrow	0.000497404	0.0005427	0.000544756	0.000527355	0.225728
17	32790	BRD4	P493-6	B cell lymphoma	None	0.00128117	0.000260869	0.00126612	0.000555176	0.225728
18	49737	CEBPA	Kasumi-1	Myeloblast	Blood	0.000621084	0.000590939	0.00058745	0.000599451	0.230189
19	49741	RUNX1	Kasumi-1	Myeloblast	Blood	0.00108808	0.00038299	0.000902557	0.000646824	0.231521
20	38483	FAIRE	None	None	Pancreatic Islet	0.000703695	0.000666001	0.000743387	0.000702944	0.231521
21	47549	MYC	P493-6	B cell lymphoma	None	0.000700038	0.000710708	0.000775762	0.000727344	0.231521
22	35517	BCL6	OCI-Ly1	B cell lymphoma	Bone Marrow	0.00725366	0.000318878	0.00131165	0.000743267	0.231521
23	35287	BRDU	HeLa-S3	Epithelium	Cervix	0.000831415	0.000689202	0.000806208	0.000770397	0.231521
24	63133	PBX2	K562	Erythroblast	Bone Marrow	0.00122062	0.000878911	0.000655116	0.00086121	0.232676
25	51512	NR5A2	HUES64	Embryonic Stem Cell	Embryo	0.00086763	0.000992229	0.000884019	0.000911412	0.232676
26	65103	ZNF419	HEK293	Epithelium	Embryonic Kidney	0.000935971	0.000928863	0.000935971	0.000933589	0.232676
27	63240	FOXK2	K562	Erythroblast	Bone Marrow	0.00106374	0.000719783	0.0013485	0.000976896	0.232676
28	55784	CTCFL	MCF-7	Epithelium	Breast	0.00145479	0.000883307	0.00080351	0.000979101	0.232676
29	35525	NCOR2	OCI-Ly1	B cell lymphoma	Bone Marrow	0.000868473	0.000732707	0.00184391	0.00098085	0.232676
30	76964	CNOT3	HCT-116	Colorectal cancer cell line	None	0.00765258	0.00217254	0.000420219	0.00100988	0.232676
31	4400	MEIS1	None	Haematopoietic Progenitor Cell	Cord blood	0.00104315	0.00148993	0.00115131	0.00120078	0.23936
32	56534	YAP1	None	None	None	0.0013076	0.00107598	0.00127208	0.00120955	0.23936
33	51750	FOXP1	LNCaP	Epithelium	Prostate	0.0017269	0.0008985	0.00138881	0.00124374	0.23936
34	63734	ELF1	K562	Erythroblast	Bone Marrow	0.00151326	0.0010126	0.00138461	0.0012655	0.23936
35	62978	YBX1	GM12878	B Lymphocyte	Blood	0.00119644	0.00127495	0.00133814	0.00126718	0.23936
36	73941	ZNF549	293T	None	None	0.00134696	0.0011918	0.00128074	0.00126996	0.23936
37	45965	MYC	K562	Erythroblast	Bone Marrow	0.0020109	0.000720431	0.00260775	0.00132228	0.23936
38	53630	STAT5B	None	T Lymphocyte	Blood	0.00169873	0.00181944	0.000975106	0.00138644	0.23936
39	58343	MED1	LNCaP-abl	Epithelium	Prostate	0.00172698	0.00104528	0.00160319	0.00138922	0.23936
40	46121	PBX3	GM12878	B Lymphocyte	Blood	0.00156212	0.00128759	0.00135803	0.0013933	0.23936
41	4945	RELA	GM18505	Lymphoblastoid	Blood	0.00135809	0.00142729	0.00152904	0.00143475	0.23936
42	76819	NEUROG2	None	Fibroblast	Fetal Lung	0.00183655	0.00127196	0.00139574	0.00146545	0.23936
43	73708	KMT2A	None	Monocyte	Cord blood	0.00399072	0.00080349	0.00192483	0.00148908	0.23936
44	53592	MED1	None	Adipocyte	None	0.00209342	0.00152047	0.0013191	0.00158439	0.24676
45	44698	LANA	BEC	Endothelial Cell	Blood	0.00162859	0.00165141	0.00162859	0.00163613	0.24676
46	71243	CEBPB	None	Osteoblast	None	0.00230076	0.00108097	0.00249969	0.00170476	0.24676
47	33459	ERG	None	Hematopoietic Cell	None	0.00812299	0.00863968	0.00066012	0.00171068	0.24676
48	49697	DEK	U937	None	Pleura	0.00166076	0.00164452	0.00191468	0.00173161	0.24676
49	59345	EBF1	LCL	Lymphoblastoid	Blood	0.00142452	0.00151473	0.00344134	0.00181515	0.24676
50	72976	DNMT3A	HEK293T	Epithelium	Embryonic Kidney	0.00188799	0.00195274	0.00193261	0.00192406	0.24676
51	57167	CDK8	MOLM-14	Myeloid Cell	None	0.0168106	0.000771695	0.005052	0.00193147	0.24676
52	64996	NR2F1	K562	Erythroblast	Bone Marrow	0.00106699	0.00874824	0.00207269	0.00195571	0.24676
53	50691	MED1	hMADS-3	Adipocyte	Adipose	0.00245537	0.00141253	0.00242324	0.00196349	0.24676
54	71925	GTF2B	K562	None	Haematopoietic and lymphoid	0.00199568	0.00201194	0.00192903	0.00197822	0.24676
55	65078	ZNF317	HEK293	Epithelium	Embryonic Kidney	0.00318873	0.00126265	0.00249323	0.00199114	0.24676
56	58872	GATA2	TF-1	Erythroblast	Bone Marrow	0.00114443	0.00208957	0.0074229	0.00201739	0.24676
57	72356	TAL1	Kasumi-1	Acute myeloid leukemia	None	0.00339923	0.00110722	0.00361108	0.00203491	0.24676
58	34394	MECP2	IMR90	Fibroblast	Lung	0.00283935	0.00149749	0.00259047	0.0021337	0.251433
59	64738	ZBTB33	K562	Erythroblast	Bone Marrow	0.0015125	0.00330496	0.00237015	0.00216506	0.251433
60	76820	NEUROG2	None	Fibroblast	Fetal Lung	0.0018644	0.00479987	0.00158775	0.00218258	0.251433
61	59006	JMJD1C	THP-1	Monocyte	Blood	0.00188273	0.00186006	0.00379743	0.00225209	0.255188
62	52495	TCF21	None	None	Coronary artery smooth muscle	0.00144047	0.00612718	0.00245951	0.00237342	0.264598
63	77264	DPF1	K562	Erythroblast	Bone Marrow	0.002618	0.00212741	0.00275106	0.00246808	0.270783
64	65111	SP4	HEK293	Epithelium	Embryonic Kidney	0.00762852	0.00383736	0.00132249	0.00261367	0.273267
65	64861	EGR2	HEK293	Epithelium	Embryonic Kidney	0.00803566	0.00443343	0.00125995	0.00262314	0.273267
66	77183	ZKSCAN5	293T	None	None	0.00259116	0.00343112	0.00218708	0.00264409	0.273267
67	62964	EED	GM12878	B Lymphocyte	Blood	0.00277344	0.00194249	0.00407347	0.00267653	0.273267
68	53650	LEF1	None	Embryonic Stem Cell	None	0.00261714	0.00269059	0.00276132	0.00268839	0.273267
69	76403	RELB	GM12878	Lymphoblastoid	None	0.00187141	0.00663734	0.00302913	0.00295526	0.29596
70	57165	CDK8	MOLM-14	Myeloid Cell	None	0.0168877	0.00129472	0.00608748	0.00301264	0.29596
71	43165	NR2F2	None	Stromal Cell	None	0.00324923	0.00176074	0.00970708	0.00306527	0.29596
72	63303	ZBTB11	K562	Erythroblast	Bone Marrow	0.00385266	0.00213627	0.0043783	0.00313787	0.29596
73	46158	PAX5	GM12891	Lymphoblastoid	Blood	0.00913773	0.00183082	0.00345901	0.00317553	0.29596
74	44699	LANA	BEC	Endothelial Cell	Blood	0.00328774	0.00316335	0.0033098	0.00325234	0.29596
75	72351	BRD4	CAL-1	Plasmacytoid dendritic cell	None	0.00356493	0.00291884	0.00354507	0.00331421	0.29596
76	56997	DACOR1	None	None	Colon	0.00470237	0.00159825	0.0170421	0.00334457	0.29596
77	72352	RUNX1	Kasumi-1	Acute myeloid leukemia	None	0.0135796	0.0020906	0.00292322	0.00335559	0.29596
78	73720	CREBBP	None	B Lymphocyte	Tonsil	0.00725902	0.00207388	0.00375194	0.00338422	0.29596
79	47407	ERG	VCaP	Epithelium	Prostate	0.00335149	0.00313414	0.00379518	0.00340547	0.29596
80	53593	MED1	None	Adipocyte	None	0.0104446	0.00380665	0.00193285	0.00342546	0.29596
81	73535	CEBPB	SUM159PT	None	Breast	0.00476637	0.00249002	0.00401518	0.00348651	0.297516
82	54076	ESR1	MCF-7	Epithelium	Breast	0.00351884	0.0035719	0.00351884	0.00353635	0.298088
83	68048	NFKB1	L1236	Hodgkin Lymphoma Cell	None	0.00391639	0.00330486	0.00367678	0.0036149	0.301038
84	77299	TRIM25	BT-549	None	Breast	0.0176746	0.0126629	0.00148895	0.00371703	0.305858
85	70162	TEAD4	BE2-C	Neuroblastoma cell	Bone Marrow	0.00295504	0.00307439	0.00945885	0.00389923	0.312294
86	70118	NEUROD1	NCI-H524	None	None	0.00346252	0.00545535	0.00347539	0.00394815	0.312294
87	69218	BIRA	BJAB	GCB DLBCL cells	None	0.00456498	0.00293569	0.00519432	0.00398825	0.312294
88	48621	BATF	OCI-Ly3	B Lymphocyte	Bone Marrow	0.00413855	0.00427714	0.00382292	0.00407049	0.312294
89	73714	AFF1	SEM	B Lymphocyte	None	0.00508229	0.0204598	0.002072	0.00411967	0.312294
90	45234	SAP30	H1	Embryonic Stem Cell	Embryo	0.00396401	0.00653509	0.00324319	0.00420389	0.312294
91	8821	SAP30	H1	Embryonic Stem Cell	Embryo	0.00396401	0.00653509	0.00324319	0.00420389	0.312294
92	43894	HOXC9	BE2-C	Neuroblast	Brain	0.00568231	0.00586957	0.00278269	0.00425101	0.312294
93	40216	MED1	None	B Lymphocyte	Blood	0.01345	0.00285427	0.00358906	0.00426559	0.312294
94	46153	YY1	GM12891	Lymphoblastoid	Blood	0.011307	0.00417764	0.00297249	0.00451663	0.312294
95	74354	OTX2	D-341	None	None	0.00205332	0.0189414	0.00835449	0.00454921	0.312294
96	73713	AFF1	SEM	B Lymphocyte	None	0.0112382	0.00372137	0.00337118	0.00458493	0.312294
97	49036	ERCC6	None	Fibroblast	Skin	0.00811292	0.00418816	0.00352021	0.00464327	0.312294
98	63362	C11orf30	K562	Erythroblast	Bone Marrow	0.0248324	0.00194201	0.012855	0.00474003	0.312294
99	62530	ZNF175	K562	Erythroblast	Bone Marrow	0.00403662	0.00446263	0.00631726	0.00476107	0.312294
100	39777	REPIN1	Kasumi-1	Myeloblast	Blood	0.00295861	0.0313151	0.00401084	0.00484515	0.312294
101	37596	TAL1	ME-1	Leukemia Cell	None	0.00738299	0.0151272	0.00239947	0.00485219	0.312294
102	55729	GATA1	K562	Erythroblast	Bone Marrow	0.0134647	0.00217651	0.0123321	0.00487991	0.312294
103	54125	CEBPB	None	Mesenchymal Stem Cell	None	0.00622883	0.00298674	0.00842537	0.00488571	0.312294
104	51245	BCL6	None	Pre-B Lymphocyte	None	0.00314232	0.00759652	0.00746782	0.00513897	0.312294
105	73707	KMT2A	None	Monocyte	Bone Marrow	0.00578572	0.00464374	0.00525225	0.00518514	0.312294
106	63365	ZNF318	K562	Erythroblast	Bone Marrow	0.00459151	0.00513073	0.00609545	0.00520153	0.312294
107	37169	MYC	MM1.S	B Lymphocyte	Blood	0.0310192	0.00287564	0.00519164	0.00523992	0.312294
108	64866	ZFX	K562	Erythroblast	Bone Marrow	0.0065808	0.00604002	0.00398889	0.00527971	0.312294
109	55730	GATA1	K562	Erythroblast	Bone Marrow	0.0230483	0.00207926	0.0241994	0.00530465	0.312294
110	59170	SETD1A	SEM	Pre-B Lymphocyte	None	0.0148732	0.00327486	0.00526271	0.00533254	0.312294
111	69220	SLC22A2	HBL1	B cell lymphoma	None	0.00759414	0.00333004	0.00803646	0.0053918	0.312294
112	62680	CREB3	K562	Erythroblast	Bone Marrow	0.00572642	0.00410858	0.00742419	0.00542777	0.312294
113	71242	CEBPB	None	Osteoblast	None	0.00663742	0.00384201	0.00709752	0.00543644	0.312294
114	48640	IRF4	OCI-Ly3	B Lymphocyte	Bone Marrow	0.00599253	0.00421949	0.00683967	0.00545382	0.312294
115	54026	ESR1	MCF-7	Epithelium	Breast	0.00526273	0.00567342	0.00545532	0.00545868	0.312294
116	36324	RELA	GM19099	Lymphoblastoid	Blood	0.00531929	0.00466822	0.00702531	0.00550913	0.312294
117	64958	ATF2	GM12878	B Lymphocyte	Blood	0.0104433	0.00297994	0.00915551	0.00555004	0.312294
118	33125	CDK9	MM1.S	B Lymphocyte	Blood	0.0406304	0.00226309	0.0142335	0.00559065	0.312294
119	42314	CTCF	GM12891	Lymphoblastoid	Blood	0.0151982	0.0261603	0.00231559	0.0055992	0.312294
120	74906	POLR3D	THP-1	Macrophage	None	0.0145631	0.0199951	0.00244925	0.00569365	0.312294
121	77069	ZNF627	293T	None	None	0.0056846	0.00539075	0.00611986	0.00571625	0.312294
122	72366	TCF4	Gen2.2	Plasmacytoid dendritic cell	None	0.0431675	0.00312475	0.005762	0.00580689	0.312294
123	4963	RELA	GM18951	Lymphoblastoid	Blood	0.0121021	0.00347101	0.00731702	0.00591272	0.312294
124	53296	ERG	TSU-1621-MT	None	None	0.011434	0.0402938	0.00254534	0.00594023	0.312294
125	63533	CEBPB	K562	Erythroblast	Bone Marrow	0.00536328	0.0135075	0.00415115	0.00598365	0.312294
126	76929	CD74	None	B Lymphocyte	None	0.00606158	0.0060259	0.00626117	0.00611448	0.312294
127	52091	TP53	IMR90	Fibroblast	Lung	0.00987663	0.00362145	0.00886815	0.0061208	0.312294
128	55291	YAP1	MDA-MB-231	Epithelium	Breast	0.0101365	0.00342794	0.0106775	0.00619822	0.312294
129	72089	AFF1	None	Leukemic cells	Bone Marrow	0.0111004	0.00500226	0.00530276	0.00626869	0.312294
130	59347	RBPJ	LCL	Lymphoblastoid	Blood	0.00551812	0.00514531	0.00985605	0.00628894	0.312294
131	46272	SPI1	K562	Erythroblast	Bone Marrow	0.0132331	0.00328924	0.0104398	0.00631113	0.312294
132	33124	MED1	MM1.S	B Lymphocyte	Blood	0.0332171	0.00356304	0.00607889	0.00631328	0.312294
133	50371	EED	None	Proerythroblast	Fetal Liver	0.00637247	0.00636303	0.00629807	0.00634435	0.312294
134	53596	RELA	None	Adipocyte	None	0.0141473	0.00424203	0.00653252	0.00652907	0.312294
135	5047	CTCF	GM19240	Lymphoblastoid	Blood	0.0112554	0.0470316	0.00287097	0.00654614	0.312294
136	49977	BRD4	90-8TL	Schwann Cell	Brain	0.0224583	0.00501711	0.00471883	0.00658297	0.312294
137	69874	RELA	None	Th1	None	0.0220652	0.00376294	0.00711884	0.00664453	0.312294
138	67768	NFE2	F5	Erythroid Progenitor Cell	Fetal Liver	0.0173222	0.0126834	0.00318501	0.00665926	0.312294
139	71281	WDR5	BGC823	human gastric cancer cells	None	0.00665941	0.00672936	0.0067294	0.00670589	0.312294
140	59168	MLLT1	SEM	Pre-B Lymphocyte	None	0.00680847	0.00637151	0.00704578	0.00673018	0.312294
141	41289	STAT1	None	Monocyte	Blood	0.0104356	0.00655183	0.00509571	0.00674624	0.312294
142	8448	TCF7L2	U937	None	Pleura	0.00684935	0.00616665	0.00743343	0.00677677	0.312294
143	50178	HIRA	IMR90	Fibroblast	Lung	0.0104645	0.00695869	0.0049382	0.00679098	0.312294
144	68825	SPI1	K562	Leukemia Cell	None	0.00479089	0.0114825	0.00693754	0.00681892	0.312294
145	73886	DNMT3B	LCL	B Lymphocyte	None	0.00690722	0.00676464	0.00680004	0.00682343	0.312294
146	8494	RUNX1	Kasumi-1	Myeloblast	Blood	0.0064415	0.00534043	0.0106741	0.006878	0.312294
147	71064	ESR1	MCF-7	None	Breast	0.00686001	0.00689913	0.00693875	0.00689915	0.312294
148	77182	ZNF100	293T	None	None	0.00705019	0.00695702	0.00689975	0.00696843	0.312294
149	49740	SPI1	Kasumi-1	Myeloblast	Blood	0.00563297	0.00634847	0.0105509	0.00697971	0.312294
150	58341	MED1	LNCaP-abl	Epithelium	Prostate	0.00719165	0.00626255	0.00763519	0.00698159	0.312294
151	45664	RELA	GM12892	Lymphoblastoid	Blood	0.00784074	0.00555776	0.00842298	0.00703915	0.312294
152	72359	ERG	Kasumi-1	Acute myeloid leukemia	None	0.0180409	0.00576421	0.00510871	0.00706493	0.312294
153	52303	BCL6	None	T Lymphocyte	Tonsil	0.00701663	0.0073889	0.00705122	0.00714837	0.312294
154	63743	FOXK2	K562	Erythroblast	Bone Marrow	0.00782639	0.00675127	0.00726738	0.00725524	0.312294
155	74432	TFAP4	SNU175	Colorectal cancer cell line	None	0.0201422	0.03723	0.00297761	0.00727766	0.312294
156	49480	E2F4	None	Retinal pigment cell	None	0.00775678	0.00658322	0.00764893	0.00728938	0.312294
157	57169	CDK8	MOLM-14	Myeloid Cell	None	0.0156496	0.00369121	0.013663	0.00735352	0.312294
158	46160	PAX5	GM12892	Lymphoblastoid	Blood	0.0106284	0.0139332	0.00419749	0.00742436	0.312294
159	53298	SPI1	TSU-1621-MT	None	None	0.0227385	0.0287778	0.0030941	0.00746609	0.312294
160	35524	BCL6	OCI-Ly1	B cell lymphoma	Bone Marrow	0.0067598	0.0059931	0.012155	0.00755562	0.312294
161	50409	PPARG	hMADS-3	Adipocyte	Adipose	0.0145833	0.00599819	0.00620069	0.00756529	0.312294
162	4974	RELA	GM12891	Lymphoblastoid	Blood	0.0124254	0.00517421	0.0081852	0.00757751	0.312294
163	39357	NFE2	None	Erythroid Cell	None	0.0184487	0.00447302	0.00864343	0.00762519	0.312294
164	75562	BRD4	None	None	Retina	0.00985446	0.0311139	0.00389221	0.00768308	0.312294
165	45647	IKZF1	GM12878	B Lymphocyte	Blood	0.00693876	0.00794976	0.00843491	0.00772276	0.312294
166	62762	PKNOX1	K562	Erythroblast	Bone Marrow	0.00896582	0.00769303	0.00696901	0.00779193	0.312294
167	33458	ERG	None	Hematopoietic Cell	None	0.0296776	0.0430297	0.00308037	0.00786577	0.312294
168	72360	FLI1	Kasumi-1	Acute myeloid leukemia	None	0.00885192	0.0225756	0.00452556	0.00793247	0.312294
169	62587	MCM7	K562	Erythroblast	Bone Marrow	0.00825466	0.00697502	0.00880248	0.00793407	0.312294
170	39002	BRD4	MM1.S	B Lymphocyte	Blood	0.0209563	0.00738263	0.00514958	0.0079506	0.312294
171	72367	TCF4	CAL-1	Plasmacytoid dendritic cell	None	0.0207511	0.00696585	0.00548297	0.00801923	0.312294
172	45400	KDM1A	K562	Erythroblast	Bone Marrow	0.00650167	0.0107269	0.00834254	0.00817674	0.312294
173	8783	KDM1A	K562	Erythroblast	Bone Marrow	0.00650167	0.0107269	0.00834254	0.00817674	0.312294
174	40233	MED1	None	B Lymphocyte	Blood	0.0477162	0.00434163	0.00869774	0.00819361	0.312294
175	68456	USF1	None	Erythroid Cell	None	0.022148	0.0054818	0.00721597	0.00819402	0.312294
176	46131	RUNX3	GM12878	B Lymphocyte	Blood	0.00996783	0.0110995	0.00573533	0.0082244	0.312294
177	4970	RELA	GM12878	B Lymphocyte	Blood	0.00682149	0.00908534	0.00929368	0.00823585	0.312294
178	58807	MAF	None	Th1	None	0.00866543	0.0108677	0.00640975	0.00825479	0.312294
179	41303	IRF1	None	Monocyte	Blood	0.00923866	0.00698658	0.00895005	0.00826214	0.312294
180	6576	CTCF	MCF-7	Epithelium	Breast	0.0115423	0.011735	0.00531461	0.00833328	0.312294
181	70962	E2F1	Raji	B Lymphocyte	Blood	0.0115333	0.00725409	0.00740936	0.00834448	0.312294
182	77079	ZNF605	293T	None	None	0.00887573	0.00767223	0.00862814	0.00835872	0.312294
183	71024	ARNTL	U2OS	Osteosarcoma cell	None	0.00881306	0.00781378	0.00852026	0.00836087	0.312294
184	34929	SPI1	None	Monocyte	None	0.00606761	0.0095881	0.0111657	0.00836447	0.312294
185	65155	ZBTB48	HEK293	Epithelium	Embryonic Kidney	0.0118229	0.0298066	0.00418091	0.00839757	0.312294
186	48997	AFF4	HeLa	Epithelium	Cervix	0.0082933	0.0088032	0.00821989	0.00843098	0.312294
187	35528	BCOR	OCI-Ly1	B cell lymphoma	Bone Marrow	0.010696	0.00673045	0.00922694	0.00856051	0.312294
188	64819	TRIM24	K562	Erythroblast	Bone Marrow	0.00530553	0.0116285	0.0136418	0.00862646	0.312294
189	69870	BRD4	None	Th1	None	0.0189477	0.00643986	0.00717021	0.008633	0.312294
190	46148	SRF	GM12878	B Lymphocyte	Blood	0.0310711	0.00413564	0.0136036	0.00863509	0.312294
191	52153	FAIRE	None	Macrophage	None	0.0127046	0.00676718	0.00833791	0.0086602	0.312294
192	76402	RELB	GM12878	Lymphoblastoid	None	0.00567343	0.0218853	0.00807062	0.00867484	0.312294
193	62861	ZNF584	K562	Erythroblast	Bone Marrow	0.00975478	0.00584717	0.0148101	0.00879649	0.314439
194	36356	POLR2B	IMR90	Fibroblast	Lung	0.0219139	0.00643689	0.00719577	0.00882539	0.314439
195	55682	PAF1	MCF-7	Epithelium	Breast	0.00983892	0.00826445	0.00873517	0.008899	0.315435
196	64865	ZFX	K562	Erythroblast	Bone Marrow	0.011383	0.00927743	0.0072254	0.00898107	0.315795
197	38389	BRD4	None	T Lymphocyte	Blood	0.01217	0.0058413	0.0125365	0.00900577	0.315795
198	51864	HSF1	451Lu	Melanoma Cell	None	0.0108646	0.0229274	0.00512154	0.00906692	0.315795
199	76817	NEUROG2	None	Fibroblast	Fetal Lung	0.0082843	0.0183929	0.00645864	0.0090939	0.315795
200	54047	ESR1	T47D	Epithelium	Mammary Gland	0.00901974	0.00897783	0.00943312	0.00913902	0.315795
201	33123	CDK9	MM1.S	B Lymphocyte	Blood	0.0396384	0.00398333	0.0199072	0.00919148	0.315795
202	38841	CREB3	LoVo	None	Colon	0.00969137	0.00856284	0.00974437	0.00929969	0.315795
203	40227	CDK9	None	B Lymphocyte	Blood	0.0343362	0.0043974	0.0152277	0.00931344	0.315795
204	73950	ZNF3	293T	None	None	0.00920597	0.00930702	0.00946042	0.0093233	0.315795
205	76965	CNOT3	None	None	Snap-frozen tissue	0.0311355	0.101995	0.00358752	0.00936603	0.315795
206	64860	EGR2	HEK293	Epithelium	Embryonic Kidney	0.026481	0.0197439	0.00443226	0.00955542	0.317257
207	70755	MYC	LNCaP	None	LNCaP cells	0.020922	0.00494957	0.0166537	0.00968253	0.317257
208	73697	PAF1	SEM	B Lymphocyte	None	0.0128442	0.00692141	0.0115385	0.0097089	0.317257
209	37608	MYH11	ME-1	Leukemia Cell	None	0.0142626	0.0341395	0.00479992	0.00975093	0.317257
210	63534	CEBPB	K562	Erythroblast	Bone Marrow	0.00658105	0.0283038	0.00849688	0.00983842	0.317257
211	73406	RBPJ	None	Neurosphere	None	0.0115191	0.00879918	0.00987918	0.00994429	0.317257
212	48450	BRD4	MCF-7	Epithelium	Breast	0.0112102	0.00894876	0.00995575	0.0099537	0.317257
213	73715	KMT2A	SEM	B Lymphocyte	None	0.0245174	0.0619429	0.00409675	0.0099725	0.317257
214	72347	BRD4	Gen2.2	Plasmacytoid dendritic cell	None	0.0102313	0.0098229	0.0100205	0.0100221	0.317257
215	72049	MYC	Gen2.2	None	None	0.0284477	0.00455599	0.0230229	0.0100673	0.317257
216	45824	SREBF1	HepG2	Epithelium	Liver	0.0102483	0.00990965	0.0101055	0.0100859	0.317257
217	63241	FOXK2	K562	Erythroblast	Bone Marrow	0.0112219	0.010123	0.0091577	0.0100978	0.317257
218	5574	GATA1	None	Erythroblast	Blood	0.00910936	0.00809753	0.0160946	0.0101559	0.317257
219	64735	IKZF1	GM12878	B Lymphocyte	Blood	0.00872121	0.0137767	0.00927461	0.0101672	0.317257
220	73967	ZNF225	293T	None	None	0.0102445	0.0102989	0.0100829	0.0102079	0.317257
221	44435	TAL1	None	None	Cord blood	0.0125022	0.00598589	0.0223486	0.0102825	0.317257
222	74315	MLLT1	MV4;11	Acute myeloid leukemia	None	0.0097879	0.011629	0.00978145	0.0103308	0.317257
223	74907	POLR3D	THP-1	Macrophage	None	0.0305934	0.0263746	0.00459076	0.0104047	0.317257
224	53419	NCOR1	Kasumi-1	Myeloblast	Blood	0.0117752	0.00732838	0.0153289	0.0104673	0.317257
225	53599	RELA	None	Adipocyte	None	0.0114128	0.0650668	0.00545583	0.0104853	0.317257
226	4492	PPARG	SGBS	Adipocyte	Adipose	0.0128964	0.00703079	0.0154566	0.0105464	0.317257
227	44697	LANA	None	Endothelial Cell	None	0.0107798	0.0105802	0.0102981	0.010549	0.317257
228	4610	TAL1	None	Proerythroblast	Bone Marrow	0.0129232	0.00792551	0.0124983	0.0105797	0.317257
229	68823	SPI1	K562	Leukemia Cell	None	0.0220294	0.00486184	0.0313374	0.0106044	0.317257
230	45895	CCNT2	K562	Erythroblast	Bone Marrow	0.0246312	0.0101063	0.00699869	0.0106233	0.317257
231	58638	MED1	LNCaP-abl	Epithelium	Prostate	0.0107871	0.0104459	0.0107172	0.010648	0.317257
232	54243	FOXO1	None	Stromal Cell	Endometrium	0.0139536	0.00714571	0.014882	0.0107607	0.317257
233	54127	CEBPB	None	Mesenchymal Stem Cell	None	0.0123183	0.00958104	0.0107477	0.0107683	0.317257
234	62679	CREB3	K562	Erythroblast	Bone Marrow	0.00962248	0.00917	0.0154883	0.0108095	0.317257
235	69761	BRD4	MV4;11	Leukemia Cell	Blood	0.0238647	0.00874589	0.00826445	0.0108219	0.317257
236	45960	STAT2	K562	Erythroblast	Bone Marrow	0.0125066	0.00852905	0.0125393	0.0108323	0.317257
237	77155	ZNF248	293T	None	None	0.0107756	0.00984076	0.0124095	0.010909	0.318155
238	9324	MEIS1	SEM	Pre-B Lymphocyte	None	0.0104994	0.0114661	0.0109787	0.0109672	0.31851
239	58636	MED1	LNCaP-abl	Epithelium	Prostate	0.0111384	0.0110632	0.011129	0.0111101	0.319132
240	63177	ETV1	K562	Erythroblast	Bone Marrow	0.0143295	0.00830094	0.0125444	0.0111125	0.319132
241	37057	FLI1	U937	None	Pleura	0.0266936	0.0117635	0.00679444	0.0111271	0.319132
242	33934	CTCF	MM1.S	B Lymphocyte	Blood	0.0369393	0.0133179	0.00608309	0.0112581	0.31969
243	67829	BRD4	SUM159R	None	None	0.012145	0.00830794	0.0158356	0.0112847	0.31969
244	73542	MED1	SUM159PT	mammary carcinoma cell line	Breast	0.0117354	0.0105614	0.0116367	0.0112854	0.31969
245	37945	ETS1	None	Endothelial Cell	Umbilical Vein	0.0102019	0.0128767	0.0112452	0.0113376	0.319858
246	34400	MECP2	HCT-116	None	Colon	0.0159812	0.00696675	0.0175223	0.0113998	0.320308
247	54104	DAXX	PC-3	Epithelium	Prostate	0.0138778	0.0183569	0.00750181	0.0115466	0.322291
248	46141	CREB1	GM12878	B Lymphocyte	Blood	0.0254896	0.00597054	0.0189522	0.0115637	0.322291
249	45961	UBTF	K562	Erythroblast	Bone Marrow	0.0167689	0.0183283	0.00695542	0.0116304	0.32285
250	76519	SETD1A	None	Erythroid Cell	None	0.0292297	0.00725765	0.0118537	0.0117043	0.323469
251	45674	RELA	GM18951	Lymphoblastoid	Blood	0.0133873	0.00967706	0.0129498	0.011753	0.323469
252	62930	ZNF341	HEK293	Epithelium	Embryonic Kidney	0.00946626	0.0237736	0.00937147	0.0117932	0.323469
253	56351	CDK8	MOLM-14	Myeloid Cell	None	0.0122765	0.0104813	0.0130783	0.0118424	0.323538
254	72627	ETS1	None	Endothelial Cell	Umbilical Vein	0.0132193	0.00905911	0.0155118	0.0119763	0.324543
255	54573	HSF1	U2OS	None	Bone	0.0155125	0.00918474	0.0130445	0.0120002	0.324543
256	67720	CREB1	LNCaP	Epithelium	Prostate	0.0607479	0.00673953	0.0122348	0.0121738	0.324543
257	58083	KDM2B	None	Stem cell	Blood	0.0204275	0.046678	0.00575285	0.0122908	0.324543
258	40016	MED1	MM1.S	B Lymphocyte	Blood	0.0263938	0.007465	0.0138826	0.012303	0.324543
259	63028	MBD2	K562	Erythroblast	Bone Marrow	0.0316113	0.00616552	0.0205266	0.0123725	0.324543
260	35308	TCF12	Kasumi-1	Myeloblast	Blood	0.0130638	0.012622	0.0115479	0.0123778	0.324543
261	62705	ZNF24	K562	Erythroblast	Bone Marrow	0.00956298	0.0109882	0.0220206	0.0124496	0.324543
262	46156	SPI1	GM12891	Lymphoblastoid	Blood	0.0240594	0.00590381	0.0363371	0.0125854	0.324543
263	45882	UBTF	K562	Erythroblast	Bone Marrow	0.0188806	0.0153045	0.00837515	0.0126215	0.324543
264	36248	LMO2	None	Haematopoietic Progenitor Cell	Blood	0.0126015	0.0127361	0.0125385	0.0126249	0.324543
265	70752	MYC	LNCaP	None	LNCaP cells	0.0181657	0.0103024	0.0122714	0.0128427	0.324543
266	38746	RFX5	LoVo	None	Colon	0.0132092	0.0121431	0.0132867	0.0128579	0.324543
267	45812	SREBF2	HepG2	Epithelium	Liver	0.0130682	0.0128443	0.0127165	0.0128747	0.324543
268	49262	SCML2	293T-Rex	None	None	0.0128328	0.0133738	0.0124639	0.0128794	0.324543
269	49266	SCML2	293T-Rex	None	None	0.0199357	0.00994106	0.0122653	0.0129158	0.324543
270	64997	NR2F1	K562	Erythroblast	Bone Marrow	0.00723458	0.0397895	0.0145882	0.0129405	0.324543
271	33194	MAX	P493-6	B cell lymphoma	None	0.0284097	0.00718101	0.0174765	0.0129518	0.324543
272	65156	ZSCAN22	HEK293	Epithelium	Embryonic Kidney	0.0279729	0.0120553	0.00889439	0.0129815	0.324543
273	34564	CEBPB	None	Macrophage	None	0.0095483	0.0184147	0.0139113	0.0129921	0.324543
274	45641	RELA	GM12878	B Lymphocyte	Blood	0.0103913	0.0145763	0.0151352	0.0129923	0.324543
275	35739	FAIRE	MCF-7	Epithelium	Breast	0.011207	0.0356199	0.00882009	0.013008	0.324543
276	46009	CTCF	None	None	Brain	0.057489	0.00560232	0.0302019	0.0131105	0.324543
277	69767	BRD4	MV4;11	Leukemia Cell	Blood	0.0143718	0.00872901	0.0224042	0.0131144	0.324543
278	37604	CBFB	ME-1	Leukemia Cell	None	0.0303104	0.0543615	0.00565962	0.0131631	0.324543
279	8459	GATA1	K562	Erythroblast	Bone Marrow	0.0113208	0.0107629	0.0214749	0.0131696	0.324543
280	1795	SND1	IB4	Lymphocyte	Blood	0.0119095	0.0134419	0.0144664	0.0131876	0.324543
281	54078	ESR1	MCF-7	Epithelium	Breast	0.0139937	0.012259	0.0134515	0.0131941	0.324543
282	77300	TRIM25	BT-549	None	Breast	0.0412489	0.0348717	0.00582552	0.0133666	0.324543
283	69201	TRIM24	LNCaP	Epithelium	Prostate	0.036737	0.0745273	0.00543367	0.0133676	0.324543
284	77128	ZNF425	293T	None	None	0.0134676	0.012284	0.0152697	0.0135656	0.324543
285	71252	BRD4	None	Osteoblast	None	0.0126345	0.0152439	0.0132454	0.0136212	0.324543
286	3274	GATA1	None	Megakaryocyte	Cord blood	0.0138562	0.0122309	0.0151595	0.013643	0.324543
287	49484	MED1	None	Myoblast	None	0.0206475	0.00880194	0.0180182	0.0137917	0.324543
288	64691	CBFB	GM12878	B Lymphocyte	Blood	0.018644	0.0118495	0.0126011	0.0138006	0.324543
289	50411	PPARG	hMADS-3	Adipocyte	Adipose	0.0310774	0.00975542	0.0121446	0.0138257	0.324543
290	50413	KLF11	hMADS-3	Adipocyte	Adipose	0.029148	0.0267048	0.00690214	0.0138525	0.324543
291	41301	IRF1	None	Monocyte	Blood	0.0147374	0.00967546	0.0222973	0.0138863	0.324543
292	1309	PHF8	HeLa	Epithelium	Cervix	0.0206152	0.00806815	0.0231199	0.01391	0.324543
293	45656	EBF1	GM12878	B Lymphocyte	Blood	0.0154918	0.0262116	0.00885474	0.0139143	0.324543
294	55292	YAP1	MDA-MB-231	Epithelium	Breast	0.020683	0.00853216	0.0199748	0.0139152	0.324543
295	64082	PBX2	K562	Erythroblast	Bone Marrow	0.0151801	0.0138401	0.0130719	0.0139776	0.324543
296	69217	BIRA	BJAB	GCB DLBCL cells	None	0.0258222	0.0163864	0.00877621	0.0140405	0.324543
297	41476	BRD4	OCI-Ly1	B cell lymphoma	Bone Marrow	0.0372724	0.00719341	0.0214758	0.0141288	0.324543
298	64575	MAFG	K562	Erythroblast	Bone Marrow	0.0244228	0.00757104	0.0260262	0.0141911	0.324543
299	75838	MYOG	Rh4	rhabdomyosarcoma	None	0.0148211	0.010638	0.0202797	0.0142332	0.324543
300	54077	ESR1	MCF-7	Epithelium	Breast	0.014115	0.0144964	0.0141839	0.0142632	0.324543
301	49468	598-SKD	MCF-7	Epithelium	Breast	0.0165778	0.0173408	0.0108686	0.0142863	0.324543
302	74431	TFAP4	COLO-320	Colorectal cancer cell line	None	0.0265468	0.00844849	0.0186679	0.0143153	0.324543
303	69616	MYC	Jurkat	T Lymphocyte	Blood	0.0270439	0.00760497	0.0256055	0.01446	0.324543
304	49536	RUNX1	None	Leukemic Blast Cell	None	0.0294453	0.0220176	0.00784405	0.0145059	0.324543
305	55493	RUNX1	None	Stem cell	Blood	0.0294453	0.0220176	0.00784405	0.0145059	0.324543
306	77449	NFKB2	L1236	Hodgkin Lymphoma Cell	None	0.0286617	0.00727605	0.0292566	0.0145323	0.324543
307	5045	CTCF	GM12892	Lymphoblastoid	Blood	0.0420288	0.0278549	0.00681131	0.0145349	0.324543
308	8418	TCF7L2	None	Haematopoietic Progenitor Cell	Blood	0.0130476	0.0145921	0.0163476	0.0145389	0.324543
309	69542	RUNX1	Kasumi-1	Myeloblast	Blood	0.0135669	0.0157174	0.0145024	0.0145429	0.324543
310	53598	RELA	None	Adipocyte	None	0.0176102	0.0121888	0.0150695	0.014621	0.324543
311	49739	LMO2	Kasumi-1	Myeloblast	Blood	0.0152435	0.0138344	0.0148833	0.0146288	0.324543
312	37638	RUNX1	SKNO-1	Myeloblast	Bone Marrow	0.0365045	0.0203184	0.00783656	0.0146951	0.324543
313	36075	MYOD1	None	Myoblast	None	0.0141957	0.0616315	0.00858601	0.0147779	0.324543
314	58639	MED1	LNCaP-abl	Epithelium	Prostate	0.0155782	0.0137968	0.0154285	0.0148892	0.324543
315	64107	KDM4B	K562	Erythroblast	Bone Marrow	0.014619	0.0142722	0.0159221	0.0149049	0.324543
316	63441	ZNF24	K562	Erythroblast	Bone Marrow	0.0165775	0.0107442	0.0210265	0.0149295	0.324543
317	45579	CTCF	None	None	Brain	0.0402412	0.0130217	0.0100966	0.0149531	0.324543
318	46119	SPI1	GM12878	B Lymphocyte	Blood	0.0158686	0.0111419	0.0214489	0.0150466	0.324543
319	45667	CTCF	GM13977	Lymphoblastoid	Blood	0.0340765	0.01372	0.0103307	0.0150763	0.324543
320	46138	PAX5	GM12878	B Lymphocyte	Blood	0.0226882	0.0130564	0.0128224	0.0151024	0.324543
321	49467	598-SKD	MCF-7	Epithelium	Breast	0.0317703	0.0552733	0.00670232	0.015105	0.324543
322	74308	CDK9	MV4;11	Acute myeloid leukemia	None	0.0151204	0.0127039	0.0188261	0.0151541	0.324543
323	73407	RBPJ	None	Neurosphere	None	0.0278253	0.010882	0.0146278	0.0152927	0.324543
324	71066	ESR1	MCF-7	None	Breast	0.0149629	0.0156765	0.0152767	0.0152998	0.324543
325	53300	RARA	TSU-1621-MT	None	None	0.035399	0.0199305	0.00852861	0.0153361	0.324543
326	55293	WWTR1	MDA-MB-231	Epithelium	Breast	0.0219776	0.00915448	0.0247927	0.0153815	0.324543
327	62764	ZNF24	K562	Erythroblast	Bone Marrow	0.0176327	0.0118624	0.0185101	0.0153822	0.324543
328	55779	CTCFL	Ovcar8	None	None	0.040915	0.0465966	0.00670905	0.0154007	0.324543
329	46026	GATA1	PBDE	Erythroblast	Blood	0.0171279	0.015618	0.0140304	0.015489	0.325411
330	62653	RAD51	HepG2	Epithelium	Liver	0.0158014	0.0155938	0.0154077	0.0155993	0.325766
331	77262	HMG20A	GM12878	B Lymphocyte	Blood	0.0159533	0.0143954	0.0166401	0.0156051	0.325766
332	64537	JUNB	K562	Erythroblast	Bone Marrow	0.0221071	0.00983072	0.0226989	0.0157079	0.325766
333	45562	CTCF	AG04449	Fibroblast	Skin	0.0342157	0.0136854	0.0113628	0.0157676	0.325766
334	59004	JMJD1C	NB4	Promyelocytic cell	Blood	0.01237	0.0254757	0.0143564	0.0158117	0.325766
335	45861	CEBPB	IMR90	Fibroblast	Lung	0.0315196	0.00981629	0.0178344	0.0158202	0.325766
336	77103	ZNF519	293T	None	None	0.0312615	0.0119331	0.0136024	0.01585	0.325766
337	52497	TCF21	None	None	Coronary artery smooth muscle	0.0136557	0.0173855	0.0172014	0.015883	0.325766
338	48628	IRF4	OCI-Ly10	B Lymphocyte	Bone Marrow	0.014741	0.0113615	0.0323555	0.0160662	0.32744
339	57659	BAHD1	HEK293	Epithelium	Embryonic Kidney	0.0183036	0.0114487	0.0225929	0.0161092	0.32744
340	52092	TP53	IMR90	Fibroblast	Lung	0.0175627	0.0161549	0.0150197	0.0161797	0.32744
341	59447	FOXP1	None	B Lymphocyte	None	0.019239	0.0111921	0.0228214	0.0162049	0.32744
342	45866	MXI1	IMR90	Fibroblast	Lung	0.033357	0.0114088	0.0148761	0.0162323	0.32744
343	55785	CTCFL	MCF-7	Epithelium	Breast	0.0188151	0.0174473	0.0134882	0.0162513	0.32744
344	35300	RUNX1T1	Kasumi-1	Myeloblast	Blood	0.0154905	0.016717	0.0167456	0.0162962	0.32744
345	48344	SNAI2	None	Keratinocyte	None	0.053188	0.00948985	0.0169788	0.0163958	0.328487
346	68016	KDM2B	HPB-ALL	Leukemia Cell	None	0.016793	0.016516	0.016793	0.0166997	0.332758
347	37602	TCF12	ME-1	Leukemia Cell	None	0.0309787	0.0372015	0.00838431	0.0168213	0.332758
348	46265	NR2F2	K562	Erythroblast	Bone Marrow	0.0134561	0.013375	0.0344428	0.0168463	0.332758
349	73446	RUNX1	THP-1	AML cell line	None	0.0159321	0.0202611	0.0152711	0.0168916	0.332758
350	33130	ESR1	ZR-75-1	Epithelium	Mammary Gland	0.0168725	0.0168725	0.0170119	0.0169187	0.332758
351	46120	TCF12	GM12878	B Lymphocyte	Blood	0.0280892	0.0138712	0.014398	0.0169369	0.332758
352	43065	BRD4	HEK293T	Epithelium	Embryonic Kidney	0.018052	0.0172685	0.0156915	0.016946	0.332758
353	44095	RUNX1	None	T Lymphocyte	Blood	0.0165041	0.0177887	0.0170517	0.0170987	0.334806
354	76520	BPTF	None	Erythroid Cell	None	0.045572	0.00900582	0.0242188	0.0172232	0.335282
355	2811	RARA	UPR9	Promyelocytic cell	Bone Marrow	0.0230154	0.0211764	0.0120299	0.0172629	0.335282
356	33177	MAX	H128	Epithelium	Lung	0.0437936	0.0344091	0.00821793	0.0172943	0.335282
357	661	MAX	GM12878	B Lymphocyte	Blood	0.0349061	0.0104927	0.0202707	0.0173171	0.335282
358	71216	FOXA1	LNCaP	Epithelium	Prostate	0.0285632	0.0178962	0.0124129	0.0175	0.337015
359	37607	CBFB	ME-1	Leukemia Cell	None	0.0661355	0.0195941	0.00949008	0.0175041	0.337015
360	2078	JUN	K562	Erythroblast	Bone Marrow	0.0211884	0.0142926	0.0189206	0.0176461	0.337495
361	45874	JUN	K562	Erythroblast	Bone Marrow	0.0211884	0.0142926	0.0189206	0.0176461	0.337495
362	64052	CEBPG	K562	Erythroblast	Bone Marrow	0.0135886	0.0259546	0.0173554	0.0176755	0.337495
363	50412	KLF11	hMADS-3	Adipocyte	Adipose	0.0506936	0.0455131	0.00789788	0.0178415	0.338285
364	39025	BRD4	U87	None	Brain	0.0192809	0.0183008	0.016278	0.0178636	0.338285
365	55543	RAG2	None	Thymocyte	None	0.0247535	0.0133274	0.0190444	0.0178647	0.338285
366	58881	RAD21	TF-1	Erythroblast	Bone Marrow	0.0144046	0.0174805	0.0244743	0.0179127	0.338285
367	41482	BCL6	OCI-Ly1	B cell lymphoma	Bone Marrow	0.0144088	0.0205633	0.0207879	0.0180579	0.339403
368	46135	SP1	GM12878	B Lymphocyte	Blood	0.0318516	0.0139133	0.0159297	0.0180701	0.339403
369	63845	MCM7	K562	Erythroblast	Bone Marrow	0.017906	0.0180881	0.0184882	0.0181575	0.339801
370	40053	CDK7	None	B Lymphocyte	Blood	0.0448644	0.00944425	0.0272928	0.0182122	0.339801
371	58808	MAF	None	Th1	None	0.0281284	0.0129077	0.0195562	0.0182771	0.339801
372	64395	NR2C2	K562	Erythroblast	Bone Marrow	0.0147144	0.0277477	0.0167219	0.0183164	0.339801
373	63176	ETV1	K562	Erythroblast	Bone Marrow	0.0203025	0.0137434	0.0242113	0.01837	0.339801
374	67715	CREB1	LNCaP	Epithelium	Prostate	0.0437921	0.00966307	0.0270802	0.0183862	0.339801
375	38289	MAX	H128	Epithelium	Lung	0.0392382	0.0217341	0.0111164	0.0185874	0.342603
376	63425	DDX20	K562	Erythroblast	Bone Marrow	0.0183688	0.017594	0.0201389	0.0186414	0.342684
377	53594	MED1	None	Adipocyte	None	0.0272647	0.0430654	0.00994786	0.0187099	0.342897
378	39350	KLF1	None	Erythroid Cell	None	0.0445614	0.0125707	0.0173333	0.0187942	0.342897
379	54234	RUNX1	Jurkat	T Lymphocyte	Blood	0.0197837	0.0216325	0.0161847	0.0189206	0.342897
380	59416	RUNX1	Jurkat	T Lymphocyte	Blood	0.0197837	0.0216325	0.0161847	0.0189206	0.342897
381	67764	SPI1	None	Hematopoietic stem and progenitor cell	Bone Marrow	0.0494936	0.00807281	0.0687402	0.01894	0.342897
382	45928	MYC	K562	Erythroblast	Bone Marrow	0.0187792	0.0174369	0.0209612	0.0189506	0.342897
383	1219	GATAD1	HeLa	Epithelium	Cervix	0.0176279	0.0176463	0.0226639	0.0190455	0.343154
384	33543	GATA1	None	Proerythroblast	Fetal Liver	0.0221356	0.0128481	0.0290885	0.0190641	0.343154
385	63132	PBX2	K562	Erythroblast	Bone Marrow	0.0353799	0.0111642	0.02601	0.0192019	0.34389
386	74304	CDK9	MV4;11	Acute myeloid leukemia	None	0.0150184	0.0178177	0.0304505	0.0192888	0.34389
387	37056	FLI1	U937	None	Pleura	0.0418718	0.0157714	0.0146813	0.0193107	0.34389
388	70808	MYC	HCT-116	Colon cancer cell	Colon	0.0216541	0.0450301	0.0116616	0.0194711	0.34389
389	58809	MAF	None	Th2	None	0.0537479	0.00950037	0.0330136	0.0194767	0.34389
390	74508	ETS1	DU145	Epithelium	Prostate	0.0192235	0.0196085	0.0196087	0.0194785	0.34389
391	44097	RUNX1	None	T Lymphocyte	Blood	0.0227934	0.0158986	0.0213084	0.0195191	0.34389
392	8417	TCF7L2	None	Haematopoietic Progenitor Cell	Blood	0.0224971	0.0139552	0.0270392	0.0195981	0.34389
393	47774	LDB1	None	Erythroid Progenitor Cell	Blood	0.0275488	0.0126077	0.0271178	0.0196766	0.34389
394	55555	SPI1	None	B Lymphocyte	None	0.0608194	0.00867167	0.0483967	0.0197072	0.34389
395	36230	TTF2	HEK293	Epithelium	Embryonic Kidney	0.0425188	0.0136575	0.0184118	0.0198673	0.34389
396	32814	MAX	P493-6	B cell lymphoma	None	0.0276087	0.0189107	0.0162253	0.0199041	0.34389
397	70754	MYC	LNCaP	None	LNCaP cells	0.0278985	0.0195659	0.015702	0.0199165	0.34389
398	33284	TAL1	None	Proerythroblast	Fetal Liver	0.0210946	0.0202538	0.0189543	0.0200619	0.34389
399	39047	BRD4	MM1.S	B Lymphocyte	Blood	0.030143	0.018472	0.0162101	0.0201361	0.34389
400	74318	MLLT1	MV4;11	Acute myeloid leukemia	None	0.0206123	0.0208298	0.0191774	0.0201793	0.34389
401	46290	GATA2	K562	Erythroblast	Bone Marrow	0.0154049	0.018001	0.0355008	0.0201874	0.34389
402	4493	PPARG	SGBS	Adipocyte	Adipose	0.0216555	0.0168079	0.0236824	0.0202847	0.34389
403	8118	MYC	K562	Erythroblast	Bone Marrow	0.0218265	0.0160906	0.0252099	0.0203219	0.34389
404	41166	PPARG	SGBS	Adipocyte	Adipose	0.0166417	0.020888	0.0252628	0.0203331	0.34389
405	52057	GATA2	LNCaP	Epithelium	Prostate	0.0326031	0.0240864	0.0133259	0.0203802	0.34389
406	44090	ETS1	None	T Lymphocyte	Blood	0.0181092	0.0198177	0.024177	0.0204027	0.34389
407	45421	RBBP5	K562	Erythroblast	Bone Marrow	0.0174046	0.0193241	0.0265723	0.0204316	0.34389
408	62811	COPS2	K562	Erythroblast	Bone Marrow	0.0203153	0.0204065	0.0206359	0.0204517	0.34389
409	46163	YY1	GM12892	Lymphoblastoid	Blood	0.0291295	0.0318691	0.0123463	0.0204549	0.34389
410	1375	CEBPA	HepG2	Epithelium	Liver	0.0144036	0.0604934	0.0166048	0.0205363	0.34389
411	45625	NFYB	GM12878	B Lymphocyte	Blood	0.0263366	0.0218569	0.0160561	0.0205486	0.34389
412	63825	GLIS2	HEK293	Epithelium	Embryonic Kidney	0.0291472	0.0516499	0.0108456	0.0205798	0.34389
413	8416	SMAD1	None	Haematopoietic Progenitor Cell	Blood	0.02057	0.0136173	0.0420938	0.0205819	0.34389
414	4973	RELA	GM12891	Lymphoblastoid	Blood	0.0238388	0.0181862	0.0205274	0.0205976	0.34389
415	46025	GATA1	PBDE	Erythroblast	Blood	0.0191943	0.0191936	0.0244765	0.0206822	0.344471
416	5928	ETS1	RWPE1	Epithelium	Prostate	0.0204319	0.0209602	0.0211046	0.0208282	0.345388
417	56538	YAP1	HuCCT1	None	None	0.020612	0.0208395	0.02109	0.0208454	0.345388
418	38684	EGR1	LoVo	None	Colon	0.022857	0.0181504	0.0223286	0.0208872	0.345388
419	46017	CTCF	NHEK	Keratinocyte	Skin	0.0527056	0.021062	0.0132307	0.0211333	0.348579
420	64083	PBX2	K562	Erythroblast	Bone Marrow	0.0231608	0.0203748	0.0204101	0.0212388	0.348579
421	45973	MYC	K562	Erythroblast	Bone Marrow	0.019834	0.0169377	0.0315951	0.0212625	0.348579
422	8776	HDAC2	K562	Erythroblast	Bone Marrow	0.0222161	0.0213402	0.0205097	0.0213327	0.348579
423	70815	SP1	HCT-116	Colon cancer cell	Colon	0.031351	0.0758196	0.0104644	0.0213567	0.348579
424	73237	IKZF1	None	B cell precursor	None	0.0218015	0.0173791	0.0271016	0.0213828	0.348579
425	50898	PAX6	6540 cells	Epithelium	None	0.0245668	0.0190842	0.0215184	0.0214939	0.349567
426	42413	STAG1	GM18951	Lymphoblastoid	Blood	0.0469197	0.0144131	0.0207886	0.0216231	0.35004
427	45676	RELA	GM19099	Lymphoblastoid	Blood	0.0321202	0.0120745	0.0402487	0.0216243	0.35004
428	42272	CTCF	GM12878	B Lymphocyte	Blood	0.0292039	0.108017	0.0105165	0.0216898	0.35028
429	74207	BRD4	SF8628	None	Pontine	0.0282001	0.0172796	0.0225669	0.0217966	0.350618
430	55585	MEF2B	None	B Lymphocyte	None	0.0221404	0.0196264	0.024142	0.0218122	0.350618
431	43447	TAL1	None	Proerythroblast	Bone Marrow	0.0214993	0.0137142	0.0564439	0.021888	0.351021
432	46278	ETS1	K562	Erythroblast	Bone Marrow	0.018256	0.0267272	0.0229333	0.0220928	0.352925
433	73970	ZNF202	293T	None	None	0.030309	0.0340853	0.0136741	0.0221526	0.352925
434	68222	NR3C1	BEAS-2B	Epithelium	Lung	0.0256499	0.0163393	0.0284621	0.0221713	0.352925
435	49277	MYC	LS174T	Epithelium	Colon	0.0231456	0.0219132	0.0216314	0.022211	0.352925
436	51542	POU5F1	HUES64	Embryonic Stem Cell	Embryo	0.0230152	0.0218645	0.022327	0.0223923	0.354227
437	45885	MYC	K562	Erythroblast	Bone Marrow	0.0396281	0.0111674	0.0518341	0.0223954	0.354227
438	77181	ZNF100	293T	None	None	0.021524	0.0253406	0.0209584	0.0224494	0.354269
439	73701	KDM2B	SEM	B Lymphocyte	None	0.0526356	0.0675267	0.0100552	0.0225476	0.354534
440	38591	E2F7	IMR90	Fibroblast	Lung	0.022307	0.0185864	0.0291517	0.0225687	0.354534
441	53549	SPI1	TSU-1621-MT	None	None	0.043665	0.0112123	0.0534038	0.0229561	0.35594
442	56902	ESR1	MCF-7	Epithelium	Breast	0.0220367	0.0236486	0.023437	0.0230182	0.35594
443	54024	ESR1	MCF-7	Epithelium	Breast	0.022405	0.0232839	0.0233931	0.0230187	0.35594
444	73236	IKZF1	None	B cell precursor	None	0.0238226	0.0169846	0.0340982	0.0230482	0.35594
445	35309	FLI1	SKNO-1	Myeloblast	Bone Marrow	0.0401239	0.0257858	0.0150383	0.0230483	0.35594
446	9317	SMC1A	BCBL1	B cell lymphoma	None	0.0577467	0.0321026	0.0122903	0.023126	0.35594
447	73533	CEBPB	SUM159PT	None	Breast	0.0224044	0.0210159	0.0266778	0.0231304	0.35594
448	48061	BRD4	None	Endothelial Cell	Umbilical Vein	0.0168694	0.0333729	0.024841	0.0231694	0.35594
449	54126	CEBPB	None	Mesenchymal Stem Cell	None	0.0239571	0.0237987	0.0220765	0.0232456	0.35594
450	33932	BRD4	MM1.S	B Lymphocyte	Blood	0.0551045	0.0133416	0.0277664	0.0232507	0.35594
451	36247	LYL1	None	Haematopoietic Progenitor Cell	Blood	0.0229652	0.0239742	0.0229279	0.0232792	0.35594
452	65049	MCM3	K562	Erythroblast	Bone Marrow	0.0217408	0.0246082	0.0237637	0.0233076	0.35594
453	32812	BRD4	P493-6	B cell lymphoma	None	0.0246566	0.0213152	0.0244778	0.0233783	0.35594
454	42688	LHX4	LoVo	None	Colon	0.0235542	0.0233774	0.0233774	0.023436	0.35594
455	52087	TRIM28	None	Hematopoietic Stem Cell	None	0.054824	0.0906686	0.010103	0.0234435	0.35594
456	48314	SPI1	GM12878	B Lymphocyte	Blood	0.0313491	0.0257383	0.0175942	0.0235156	0.35594
457	62697	ZNF207	MCF-7	Epithelium	Breast	0.0230622	0.0240663	0.0239618	0.0236881	0.35594
458	32848	TERC	HeLa	Epithelium	Cervix	0.0122404	0.159496	0.0256027	0.0236965	0.35594
459	77097	ZNF540	293T	None	None	0.023732	0.023732	0.0238214	0.0237617	0.35594
460	56291	LMNA	None	Adipocyte	None	0.0238214	0.023732	0.023732	0.0237617	0.35594
461	58871	GATA2	TF-1	Erythroblast	Bone Marrow	0.0199207	0.017562	0.0521575	0.023762	0.35594
462	45941	USF2	K562	Erythroblast	Bone Marrow	0.0247997	0.0221492	0.0246143	0.0237911	0.35594
463	62704	ZNF24	K562	Erythroblast	Bone Marrow	0.0190175	0.0249925	0.0303198	0.0238914	0.356668
464	45428	HDAC1	K562	Erythroblast	Bone Marrow	0.020815	0.0403711	0.0191223	0.0239847	0.357076
465	46222	REST	HeLa-S3	Epithelium	Cervix	0.0274196	0.0225309	0.0228824	0.024086	0.357076
466	58139	RUNX1	U937	None	Pleura	0.0354136	0.0267689	0.0169984	0.0241156	0.357076
467	51611	THAP11	HUES64	Embryonic Stem Cell	Embryo	0.0242517	0.0236786	0.0244593	0.0241254	0.357076
468	67828	BRD4	None	None	None	0.0238913	0.0208502	0.0294472	0.0242382	0.357979
469	72625	ETS1	None	Endothelial Cell	Umbilical Vein	0.0197508	0.0395325	0.0211107	0.0243366	0.358666
470	36300	BRD4	None	T Lymphocyte	Blood	0.0348662	0.0170209	0.0289097	0.0245903	0.361634
471	64300	NR2F6	K562	Erythroblast	Bone Marrow	0.0197693	0.0313988	0.0256094	0.0246973	0.362436
472	57171	CDK8	MOLM-14	Myeloid Cell	None	0.0221771	0.0275901	0.0255065	0.024888	0.364461
473	46200	ZBTB33	HCT-116	None	Colon	0.0240046	0.0376616	0.0192482	0.02497	0.364505
474	72626	ETS1	None	Endothelial Cell	Umbilical Vein	0.020976	0.0255195	0.0301538	0.0249965	0.364505
475	39560	MYC	BJ	Fibroblast	Skin	0.0229056	0.0216497	0.0334301	0.0250519	0.364545
476	45864	MAFK	IMR90	Fibroblast	Lung	0.042104	0.0117345	0.0938505	0.0251288	0.364896
477	77060	ZNF684	293T	None	None	0.0251678	0.0249762	0.0254379	0.0251926	0.365054
478	68309	NR4A1	Kasumi-1	Acute myeloid leukemia	None	0.0463667	0.0122519	0.0657729	0.025374	0.366728
479	62965	EED	GM12878	B Lymphocyte	Blood	0.0219954	0.0198296	0.0450737	0.0254141	0.366728
480	52496	TCF21	None	None	Coronary artery smooth muscle	0.0296015	0.0308905	0.0194265	0.025506	0.367
481	59344	EBF1	MutuI	B Lymphocyte	None	0.0208758	0.110997	0.0165094	0.0255875	0.367
482	68826	SPI1	K562	Leukemia Cell	None	0.0238902	0.0315449	0.0229527	0.0256143	0.367
483	73453	T	None	Th1	None	0.0770119	0.0169758	0.0221153	0.0256454	0.367
484	55405	KMT2D	OCI-Ly7	B cell lymphoma	Blood	0.0423696	0.0178738	0.0270483	0.0257538	0.367595
485	5048	CTCF	GM19238	Lymphoblastoid	Blood	0.0396076	0.0406825	0.0150285	0.0257933	0.367595
486	48332	SNAI2	None	Keratinocyte	None	0.0389199	0.0404515	0.0152673	0.0258937	0.36769
487	3006	CEBPA	None	Adipocyte	Adipose	0.0392416	0.0151736	0.0408628	0.0259064	0.36769
488	75854	BRD4	7250	Fibroblast	None	0.027603	0.0249667	0.0255006	0.025975	0.367818
489	77081	ZNF585A	293T	None	None	0.0328496	0.0198471	0.0290083	0.0260218	0.367818
490	45923	CEBPB	K562	Erythroblast	Bone Marrow	0.0327523	0.0228132	0.0251156	0.0262752	0.368653
491	49746	BRD4	None	Fibroblast	None	0.0264003	0.0264003	0.0264958	0.026432	0.368653
492	36321	RELA	GM15510	Lymphoblastoid	Blood	0.0357132	0.018683	0.0315805	0.0265089	0.368653
493	8478	RUNX1	Kasumi-1	Myeloblast	Blood	0.0243801	0.0266514	0.0293777	0.0266486	0.368653
494	76814	NEUROG2	None	Fibroblast	Fetal Lung	0.0390584	0.0196035	0.0281005	0.026743	0.368653
495	77117	ZNF445	293T	None	None	0.027337	0.0258572	0.0272016	0.0267817	0.368653
496	46127	ELF1	GM12878	B Lymphocyte	Blood	0.0601773	0.0155121	0.0322544	0.0267868	0.368653
497	73239	IKZF1	None	B cell precursor	None	0.0251876	0.0218875	0.0379882	0.0268578	0.368653
498	42217	STAT3	SU-DHL2	B Lymphocyte	None	0.0520333	0.0146742	0.0411465	0.0268869	0.368653
499	1628	PHF8	Hs68	Fibroblast	Foreskin	0.026536	0.0286997	0.025754	0.0269405	0.368653
500	42445	CTCF	GM19238	Lymphoblastoid	Blood	0.0496018	0.108434	0.0121841	0.0269881	0.368653
501	64414	HMBOX1	K562	Erythroblast	Bone Marrow	0.0401323	0.0139057	0.0692921	0.0269973	0.368653
502	74381	IL1B	MCF-7	None	Breast	0.022409	0.031711	0.0286738	0.02702	0.368653
503	44433	TAL1	None	None	Cord blood	0.0472758	0.0146728	0.046311	0.0270735	0.368653
504	33864	POU5F1	NCCIT	None	Embryo	0.0289711	0.0200608	0.0381556	0.0271358	0.368653
505	8415	SMAD1	None	Haematopoietic Progenitor Cell	Blood	0.0730496	0.0145161	0.0356581	0.0271532	0.368653
506	73935	ZNF667	293T	None	None	0.0271729	0.026978	0.0274675	0.0272046	0.368653
507	71670	CTCF	786-O	Epithelium	Kidney	0.0660687	0.0685745	0.0124093	0.0272512	0.368653
508	5041	CTCF	GM12878	B Lymphocyte	Blood	0.0749049	0.0145389	0.0356493	0.0272631	0.368653
509	35854	CTCF	GM12891	Lymphoblastoid	Blood	0.034094	0.0867035	0.0144265	0.0272717	0.368653
510	75942	KDM1A	PC-3M-luc	None	Prostate	0.0378343	0.0198774	0.0303151	0.0273457	0.368653
511	67573	JUN	BT-549	None	Breast	0.0253811	0.0252912	0.0325256	0.0273523	0.368653
512	35091	NCOR1	OCI-Ly1	B cell lymphoma	Bone Marrow	0.0243517	0.0250171	0.0349984	0.0273716	0.368653
513	36245	FLI1	None	Haematopoietic Progenitor Cell	Blood	0.0336963	0.0245374	0.0255721	0.0273896	0.368653
514	41287	STAT1	None	Monocyte	Blood	0.0647079	0.0133198	0.052705	0.0274364	0.368653
515	37055	FLI1	NB4	Promyelocytic cell	Blood	0.0259058	0.0229458	0.0369707	0.0274676	0.368653
516	9198	TCF12	RPMI-8402	T cell leukemia	Blood	0.0473367	0.0252921	0.0207522	0.0275696	0.369304
517	45837	CTCF	None	Epithelium	Mammary Gland	0.0707984	0.0296761	0.0164969	0.027694	0.370253
518	37597	HDAC1	ME-1	Leukemia Cell	None	0.0282285	0.0410965	0.0206835	0.0277563	0.37037
519	64919	IKZF1	K562	Erythroblast	Bone Marrow	0.0336813	0.0193232	0.0394401	0.028098	0.373485
520	50988	CTCF	H1	Embryonic Stem Cell	Embryo	0.0401196	0.0899043	0.0141308	0.0281379	0.373485
521	43684	KDM4C	KYSE-150	Epitheloid Cell	Esophagus	0.0249454	0.0346474	0.0267549	0.0282166	0.373485
522	48448	BRD4	MCF-7	Epithelium	Breast	0.0255571	0.036474	0.0252521	0.0282653	0.373485
523	77135	ZNF337	293T	None	None	0.027035	0.0282302	0.0296569	0.028267	0.373485
524	77025	ZNF823	293T	None	None	0.029827	0.0280458	0.0271941	0.0283139	0.373485
525	669	NR2C2	GM12878	B Lymphocyte	Blood	0.0283559	0.0288175	0.028533	0.0285675	0.376112
526	46335	SIN3A	PFSK-1	Neuron	Brain	0.0364463	0.0222304	0.0312011	0.0287194	0.376864
527	3272	GATA1	None	Proerythroblast	Bone Marrow	0.030286	0.0187901	0.0556449	0.028805	0.376864
528	73517	BRD4	SUM159PT	mammary carcinoma cell line	Breast	0.0432352	0.0182734	0.0380968	0.0288297	0.376864
529	38796	ZFAT	LoVo	None	Colon	0.0310036	0.0246694	0.0320841	0.0288588	0.376864
530	76849	EBF3	SK-N-SH	Neuroblastoma cell	Brain	0.0247432	0.0344462	0.0291684	0.0289228	0.376864
531	45576	CTCF	BJ	Fibroblast	Skin	0.0600706	0.0184745	0.0305051	0.02899	0.376864
532	48316	SPI1	GM12878	B Lymphocyte	Blood	0.0277138	0.028776	0.0308367	0.0290521	0.376864
533	53307	GATA2	TSU-1621-MT	None	None	0.0273373	0.0287119	0.0314231	0.0290608	0.376864
534	63363	C11orf30	K562	Erythroblast	Bone Marrow	0.193679	0.0108692	0.167889	0.0293656	0.379193
535	44093	ETS1	None	T Lymphocyte	Blood	0.0285565	0.0255346	0.0359049	0.0294042	0.379193
536	46259	SPI1	HL-60	Promyeloblast	Blood	0.0473007	0.0152837	0.0652974	0.0294827	0.379193
537	65131	ZNF350	HEK293	Epithelium	Embryonic Kidney	0.0310822	0.0290426	0.0284538	0.0294843	0.379193
538	56375	CDK8	MV4-11	Macrophage	Blood	0.0249331	0.03223	0.0327712	0.0295147	0.379193
539	64053	CEBPG	K562	Erythroblast	Bone Marrow	0.0180854	0.0485984	0.0393579	0.029638	0.379919
540	55294	WWTR1	MDA-MB-231	Epithelium	Breast	0.0421859	0.0178198	0.046952	0.029685	0.379919
541	42333	CTCF	GM12892	Lymphoblastoid	Blood	0.0448286	0.072256	0.0154555	0.0297897	0.379919
542	36317	RELA	GM12892	Lymphoblastoid	Blood	0.0314515	0.0252055	0.034886	0.0299616	0.379919
543	55542	RAG1	Ramos	Thymocyte	None	0.0297396	0.0305217	0.0298429	0.0300308	0.379919
544	50381	NFE2	None	Proerythroblast	Fetal Liver	0.0395483	0.0735911	0.0163838	0.0300662	0.379919
545	45974	CTCF	None	Epithelium	Kidney	0.0758158	0.0176698	0.0332208	0.0300709	0.379919
546	48692	H3F3B	None	Spermatid	None	0.0317427	0.0252802	0.0352203	0.0301668	0.379919
547	33175	MAX	P493-6	B cell lymphoma	None	0.0661078	0.0182562	0.0337745	0.0301752	0.379919
548	40217	BRD4	U87	None	Brain	0.0437411	0.0330353	0.0218328	0.0303306	0.379919
549	33680	GATA3	None	Th2	None	0.0390682	0.0231124	0.0335192	0.0304008	0.379919
550	46285	CEBPB	K562	Erythroblast	Bone Marrow	0.0468688	0.0236822	0.028531	0.0304304	0.379919
551	33197	MAX	U87	None	Brain	0.0438758	0.026555	0.0263181	0.030479	0.379919
552	6561	ESR1	MCF-7	Epithelium	Breast	0.0312734	0.026941	0.0341282	0.0304901	0.379919
553	70223	DNMT3B	None	Stem cell	Foreskin	0.0306802	0.0304691	0.030364	0.0305039	0.379919
554	4975	RELA	GM12891	Lymphoblastoid	Blood	0.0255474	0.0397396	0.0294395	0.0305299	0.379919
555	38299	MYC	H128	Epithelium	Lung	0.0380369	0.0248035	0.0316288	0.0305454	0.379919
556	45585	CTCF	GM10266	Lymphoblastoid	Blood	0.0509311	0.0209103	0.0325668	0.0305742	0.379919
557	3038	CREBBP	None	T Lymphocyte	Blood	0.0355281	0.02593	0.0319918	0.0306232	0.379919
558	45575	CTCF	BJ	Fibroblast	Skin	0.0917851	0.0177285	0.032596	0.0306706	0.379919
559	39352	GATA1	None	Erythroid Cell	None	0.0569298	0.0199613	0.033562	0.0308014	0.379965
560	36244	RUNX1	None	Haematopoietic Progenitor Cell	Blood	0.0252688	0.0350619	0.034164	0.0308137	0.379965
561	45612	STAT3	GM12878	B Lymphocyte	Blood	0.0356948	0.0226648	0.0399711	0.0308846	0.379965
562	64761	POLR2AphosphoS5	None	Neuron	None	0.0497901	0.0351167	0.0205816	0.0308942	0.379965
563	72700	NUP98	HEK293FT	None	Kidney	0.0312133	0.0306802	0.0311061	0.0309982	0.380535
564	63407	POLR2AphosphoS5	None	iPSC	None	0.0376262	0.0343583	0.0245195	0.0311024	0.380535
565	42704	NR4A2	LoVo	None	Colon	0.0313209	0.0309992	0.0309992	0.0311057	0.380535
566	9316	CTCF	BCBL1	B cell lymphoma	None	0.0348459	0.119911	0.0168158	0.0311705	0.380655
567	73526	BRD4	SUM159PT	mammary carcinoma cell line	Breast	0.037182	0.0336003	0.0256409	0.0313647	0.381307
568	64688	H2AFZ	DOHH-2	None	None	0.0399692	0.043954	0.0210383	0.0314901	0.381307
569	59165	KMT2A	SEM	Pre-B Lymphocyte	None	0.0533876	0.0227586	0.0306669	0.0315	0.381307
570	72630	BRD4	None	Endothelial Cell	Umbilical Vein	0.0297847	0.032761	0.0323779	0.0315846	0.381307
571	58937	NRF1	None	Epithelium	None	0.0554289	0.0500325	0.0175399	0.0315963	0.381307
572	67928	SPI1	None	Macrophage	Blood	0.115607	0.0136229	0.0754742	0.031599	0.381307
573	48626	BATF	OCI-Ly10	B Lymphocyte	Bone Marrow	0.0397573	0.0243616	0.0352778	0.0317348	0.381307
574	32899	RELA	None	Endothelial Cell	Umbilical Vein	0.0389679	0.0325262	0.0263088	0.0317768	0.381307
575	76811	NEUROG2	None	Fibroblast	Fetal Lung	0.049037	0.0270789	0.0270212	0.0318119	0.381307
576	33035	AHR	MCF-7	Epithelium	Breast	0.0226556	0.0797203	0.0265616	0.0318402	0.381307
577	65110	SP4	HEK293	Epithelium	Embryonic Kidney	0.0433781	0.0458951	0.0202615	0.0318639	0.381307
578	41831	ZBTB17	MDA-MD-231	Epithelium	Mammary Gland	0.052277	0.0270476	0.0264802	0.031972	0.381307
579	36771	ZNF143	HeLa-S3	Epithelium	Cervix	0.0316481	0.0302573	0.0347255	0.0321049	0.381307
580	4551	SPI1	None	Haematopoietic Progenitor Cell	Cord blood	0.0251052	0.0336196	0.0419706	0.0321237	0.381307
581	77039	ZNF783	293T	None	None	0.0308374	0.0362528	0.0301073	0.0321803	0.381307
582	5365	SMAD2	H9	Embryonic Stem Cell	Embryo	0.0318191	0.0304989	0.0344815	0.0321834	0.381307
583	65108	OSR2	HEK293	Epithelium	Embryonic Kidney	0.0474102	0.0301707	0.025674	0.0322009	0.381307
584	48755	CBX8	PC-3	Epithelium	Prostate	0.0370981	0.034596	0.0271551	0.0323693	0.381307
585	5439	FLI1	EWS502	Small Round Tumor Cell	None	0.0315904	0.0418806	0.0269255	0.032376	0.381307
586	68051	NFKB1	L1236	Hodgkin Lymphoma Cell	None	0.0340654	0.0360624	0.028149	0.0323951	0.381307
587	53597	RELA	None	Adipocyte	None	0.103645	0.0141808	0.0785688	0.0324099	0.381307
588	55512	YAP1	IMR90	Fibroblast	Lung	0.0557507	0.016982	0.0645944	0.0325475	0.381307
589	32889	FOXM1	U2OS	None	Bone	0.0326034	0.0326651	0.0325407	0.032603	0.381307
590	33467	ELF5	T47D	Epithelium	Mammary Gland	0.0315529	0.0333517	0.0330444	0.0326305	0.381307
591	40226	CDK9	None	B Lymphocyte	Blood	0.0777727	0.016604	0.0528316	0.0326621	0.381307
592	73699	MED1	SEM	B Lymphocyte	None	0.0482219	0.0429315	0.0209664	0.0327227	0.381307
593	35851	CTCF	GM12892	Lymphoblastoid	Blood	0.0512071	0.0446721	0.0200952	0.0327445	0.381307
594	5044	CTCF	GM12892	Lymphoblastoid	Blood	0.0533247	0.0456977	0.0197828	0.0329241	0.381307
595	62638	RNF2	K562	Erythroblast	Bone Marrow	0.0286497	0.0512846	0.0272872	0.0329587	0.381307
596	63098	SMAD5	GM12878	B Lymphocyte	Blood	0.0334243	0.032058	0.0336421	0.0330264	0.381307
597	4939	RELA	GM19193	Lymphoblastoid	Blood	0.0585438	0.0195097	0.0444144	0.0330484	0.381307
598	72918	MED1	MHH-MED-1	Cardiomyocyte	None	0.0330087	0.032943	0.0333287	0.0330926	0.381307
599	45411	PHF8	K562	Erythroblast	Bone Marrow	0.0345869	0.0399523	0.0273167	0.0331338	0.381307
600	46274	CREB1	K562	Erythroblast	Bone Marrow	0.0390561	0.0298308	0.0319213	0.0331677	0.381307
601	46333	FOXP2	PFSK-1	Neuron	Brain	0.0389728	0.0783331	0.0191942	0.0331853	0.381307
602	69894	ESR1	None	None	endometrioid adenocarcinoma	0.0229842	0.0662175	0.0314522	0.0332099	0.381307
603	45582	CTCF	GM06990	B Lymphocyte	Blood	0.0913142	0.0176566	0.0450026	0.0334708	0.381645
604	5043	CTCF	GM12891	Lymphoblastoid	Blood	0.0368245	0.10505	0.0188217	0.0334804	0.381645
605	3273	GATA1	None	Proerythroblast	Bone Marrow	0.0686557	0.0200509	0.0396178	0.0334868	0.381645
606	65147	EGR2	HEK293	Epithelium	Embryonic Kidney	0.0799868	0.0725376	0.0157551	0.0335065	0.381645
607	55517	ATF4	HAP-1	None	None	0.018426	0.0530369	0.0610711	0.0335589	0.381645
608	76810	NEUROG2	None	Fibroblast	Fetal Lung	0.0461918	0.0237134	0.039105	0.0335706	0.381645
609	55738	SPI1	K562	Erythroblast	Bone Marrow	0.0418425	0.0242482	0.0427083	0.0338866	0.382112
610	57093	CDK9	HCT-116	None	Colon	0.0337592	0.0726561	0.0221122	0.0338907	0.382112
611	71280	WDR5	BGC823	human gastric cancer cells	None	0.0338756	0.0340447	0.0338756	0.0339317	0.382112
612	73454	T	None	Th1	None	0.0820112	0.0399972	0.0195217	0.0339794	0.382112
613	32875	FAIRE	MCF7-LTED	Epithelium	Mammary Gland	0.0488413	0.0309825	0.0281239	0.0339798	0.382112
614	45668	RELA	GM15510	Lymphoblastoid	Blood	0.0527095	0.027461	0.0303946	0.0339907	0.382112
615	68972	ESR1	T47D	None	Breast	0.0337373	0.0317065	0.0371124	0.034043	0.382112
616	46033	GATA3	SH-SY5Y	None	Bone Marrow	0.0369358	0.0311461	0.0345823	0.0340539	0.382112
617	58316	MED1	LNCaP-abl	Epithelium	Prostate	0.0388925	0.0300253	0.034896	0.0342193	0.382564
618	39786	RUNX1T1	Kasumi-1	Myeloblast	Blood	0.0358992	0.0256917	0.0478552	0.034226	0.382564
619	40234	MED1	None	B Lymphocyte	Blood	0.0910753	0.0192803	0.0401971	0.0342603	0.382564
620	75559	BRD4	None	None	Retina	0.0538235	0.0440885	0.0216757	0.0343482	0.382587
621	50380	EZH2	None	Proerythroblast	Fetal Liver	0.0347934	0.0342675	0.0341371	0.034397	0.382587
622	77486	KMT2A	MV4-11	Leukemia Cell	None	0.0544357	0.106855	0.016764	0.0344307	0.382587
623	64621	NRF1	K562	Erythroblast	Bone Marrow	0.0353188	0.0428811	0.0282965	0.0344971	0.382587
624	73516	BRD4	SUM159PT	mammary carcinoma cell line	Breast	0.0328574	0.0741831	0.0232386	0.0345391	0.382587
625	45392	CHD7	K562	Erythroblast	Bone Marrow	0.0349738	0.0332494	0.0360626	0.0347232	0.383397
626	8771	CHD7	K562	Erythroblast	Bone Marrow	0.0349738	0.0332494	0.0360626	0.0347232	0.383397
627	59002	LYL1	HL-60	Promyeloblast	Blood	0.0398566	0.0354564	0.0308085	0.0349861	0.385616
628	65071	KLF12	HEK293	Epithelium	Embryonic Kidney	0.0404643	0.0404795	0.0276308	0.0350479	0.385616
629	67518	GATA3	MDA-MB-231	Epithelium	Mammary Gland	0.0422817	0.0424088	0.0262985	0.0351956	0.385616
630	44317	E2F1	LNCaP	Epithelium	Prostate	0.0684378	0.0294256	0.0272683	0.0352097	0.385616
631	45670	RELA	GM18505	Lymphoblastoid	Blood	0.0470213	0.0271355	0.0369159	0.0352155	0.385616
632	73508	BRD4	SUM159PT	mammary carcinoma cell line	Breast	0.0355182	0.0317543	0.0393061	0.0352589	0.385616
633	77109	ZNF484	293T	None	None	0.0350152	0.0360067	0.0353597	0.0354558	0.385629
634	45857	MYC	None	Endothelial Cell	Umbilical Vein	0.0437529	0.0233041	0.0531649	0.0354902	0.385629
635	8112	MYC	None	Endothelial Cell	Umbilical Vein	0.0437529	0.0233041	0.0531649	0.0354902	0.385629
636	40221	BRD4	U87	None	Brain	0.0472006	0.0652158	0.0208138	0.0355128	0.385629
637	65209	ZNF680	HEK293	Epithelium	Embryonic Kidney	0.0378362	0.0333161	0.0357527	0.035539	0.385629
638	72947	GATA4	None	Cardiomyocyte	None	0.0364083	0.0321963	0.0392204	0.0357056	0.38683
639	45618	TBP	GM12878	B Lymphocyte	Blood	0.0682106	0.0240221	0.0364447	0.0358604	0.387648
640	68053	RELB	L1236	Hodgkin Lymphoma Cell	None	0.0425593	0.0380439	0.0295794	0.0358933	0.387648
641	36311	RELA	GM15510	Lymphoblastoid	Blood	0.0407029	0.0289506	0.0413451	0.0360201	0.387968
642	56598	GATA3	BE2-C	Neuroblast	Brain	0.0256998	0.0435467	0.0469914	0.0360886	0.387968
643	50571	MYB	Jurkat	T Lymphocyte	Blood	0.0439818	0.0337357	0.0325202	0.0360914	0.387968
644	45762	CEBPB	HeLa-S3	Epithelium	Cervix	0.0686634	0.0278426	0.0313286	0.0364351	0.390886
645	49243	ETS1	PANC-1	None	Pancreas	0.0344975	0.0393475	0.0359129	0.0364759	0.390886
646	77110	ZNF483	293T	None	None	0.0369698	0.0357318	0.0370724	0.0365811	0.391099
647	65139	ZBTB42	HEK293	Epithelium	Embryonic Kidney	0.03978	0.0532567	0.0262721	0.036609	0.391099
648	77165	ZNF182	293T	None	None	0.0420085	0.0358514	0.033309	0.0367125	0.391186
649	45754	E2F1	HeLa-S3	Epithelium	Cervix	0.0515933	0.0385529	0.0274874	0.0367303	0.391186
650	69773	BRD4	MV4;11	Leukemia Cell	Blood	0.0517602	0.0367527	0.0288166	0.0369415	0.392345
651	65178	ZNF22	HEK293	Epithelium	Embryonic Kidney	0.0504662	0.0241544	0.0504662	0.0370441	0.392345
652	32850	TERC	HeLa	Epithelium	Cervix	0.025484	0.193593	0.0270127	0.0370528	0.392345
653	45472	CTCF	NHDF-Ad	Fibroblast	Skin	0.0964676	0.0199297	0.0486078	0.0370661	0.392345
654	52360	MYC	P493-6	B cell lymphoma	None	0.0362615	0.0369596	0.0382188	0.0371291	0.392411
655	37583	ERG	ME-1	Leukemia Cell	None	0.102485	0.110377	0.0160973	0.0372444	0.392462
656	39779	REPIN1	Kasumi-1	Myeloblast	Blood	0.0228135	0.0431043	0.0735246	0.0372475	0.392462
657	70810	MYC	HCT-116	Colon cancer cell	Colon	0.0499348	0.0615198	0.0226844	0.037364	0.392869
658	38729	HOXB13	LoVo	None	Colon	0.0456828	0.0277134	0.0456828	0.0375739	0.392869
659	36246	ERG	None	Haematopoietic Progenitor Cell	Blood	0.0383058	0.0378796	0.0366545	0.0376002	0.392869
660	77450	NFKB2	L1236	Hodgkin Lymphoma Cell	None	0.0573269	0.0227512	0.0544422	0.0376439	0.392869
661	8770	CHD1	K562	Erythroblast	Bone Marrow	0.0457442	0.031856	0.0378846	0.0376697	0.392869
662	44320	E2F1	LNCaP	Epithelium	Prostate	0.0729441	0.0337141	0.0276004	0.0377208	0.392869
663	8795	RBBP5	K562	Erythroblast	Bone Marrow	0.0371193	0.0388009	0.037371	0.0377495	0.392869
664	44337	E2F1	LNCaP	Epithelium	Prostate	0.0680206	0.0494498	0.0225032	0.0378432	0.392869
665	8447	SMAD1	U937	None	Pleura	0.0395287	0.0299953	0.0484513	0.0378495	0.392869
666	64555	IKZF2	HEK293	Epithelium	Embryonic Kidney	0.0621267	0.0636316	0.0210309	0.0378546	0.392869
667	44336	E2F1	LNCaP	Epithelium	Prostate	0.0851905	0.0342841	0.0262114	0.0379976	0.393762
668	46282	TAF1	K562	Erythroblast	Bone Marrow	0.0493072	0.0385919	0.0308294	0.0381603	0.394501
669	73506	BRD4	SUM159PT	mammary carcinoma cell line	Breast	0.0598082	0.0203603	0.0776994	0.0381866	0.394501
670	48636	IRF4	OCI-Ly3	B Lymphocyte	Bone Marrow	0.0431445	0.0288155	0.0488566	0.0382995	0.394501
671	56448	EHMT2	HEK293T	Epithelium	Embryonic Kidney	0.0353037	0.0337865	0.049197	0.0383441	0.394501
672	64008	ZNF589	K562	Erythroblast	Bone Marrow	0.0340723	0.0339996	0.0514853	0.038378	0.394501
673	63733	ELF1	K562	Erythroblast	Bone Marrow	0.0432052	0.0385386	0.0344688	0.0384114	0.394501
674	56664	HOXB13	LNCaP	Epithelium	Prostate	0.0490022	0.029104	0.043263	0.0385296	0.394602
675	62852	CTCF	None	None	gastroesophageal sphincter	0.0960979	0.0226449	0.0429413	0.0386095	0.394602
676	45932	GTF2B	K562	Erythroblast	Bone Marrow	0.0441464	0.0319106	0.0423233	0.0386553	0.394602
677	65214	GLIS1	HEK293	Epithelium	Embryonic Kidney	0.0964131	0.441204	0.0150283	0.0387027	0.394602
678	1991	FOS	K562	Erythroblast	Bone Marrow	0.0304797	0.0612223	0.0352122	0.0387066	0.394602
679	45711	CTCF	None	Epithelium	Heart	0.0694068	0.0294059	0.0346396	0.0388464	0.395122
680	56369	CDK8	SET2	Megakaryoblastic	Blood	0.0324412	0.0429501	0.0434087	0.0388915	0.395122
681	55774	CTCF	Delta47	None	None	0.0927912	0.0249329	0.0380111	0.0389291	0.395122
682	76682	ASXL1	HEK293	None	None	0.0993661	0.0331055	0.0272131	0.0390243	0.395507
683	45976	CTCF	LNCaP	Epithelium	Prostate	0.101687	0.0206152	0.0537365	0.0390851	0.395543
684	51554	SMAD1	HUES64	Embryonic Stem Cell	Embryo	0.0401452	0.0430505	0.0354349	0.0392895	0.395698
685	46092	SRF	ECC-1	Epithelium	Endometrium	0.0406135	0.0479052	0.0324786	0.0393306	0.395698
686	36320	RELA	GM15510	Lymphoblastoid	Blood	0.0547993	0.0256708	0.053134	0.0394876	0.395698
687	36303	RELA	GM19099	Lymphoblastoid	Blood	0.0436503	0.0282236	0.056645	0.0394938	0.395698
688	70967	MED12	None	Progenitor Cells	None	0.03294	0.0453003	0.0430102	0.0396428	0.395698
689	67494	GATA3	MDA-MB-231	Epithelium	Mammary Gland	0.0289256	0.0513561	0.0462461	0.0396606	0.395698
690	45567	CTCF	AG09319	Fibroblast	Gingiva	0.079555	0.0256393	0.0415108	0.0396978	0.395698
691	52614	RELA	MCF-7	Epithelium	Breast	0.04058	0.0365815	0.0424135	0.0397063	0.395698
692	5753	POU5F1	H9	Embryonic Stem Cell	Embryo	0.0411481	0.0377261	0.0406278	0.039776	0.395698
693	1792	RBPJ	IB4	Lymphocyte	Blood	0.0446901	0.0275032	0.0599676	0.0398041	0.395698
694	51591	SRF	HUES64	Embryonic Stem Cell	Embryo	0.0577243	0.12335	0.0199244	0.0398153	0.395698
695	54609	YAP1	SF268	None	None	0.0414967	0.030898	0.0529029	0.0398163	0.395698
696	8790	PHF8	K562	Erythroblast	Bone Marrow	0.037544	0.0612018	0.0309726	0.0398788	0.395698
697	46126	EGR1	GM12878	B Lymphocyte	Blood	0.0908607	0.0504249	0.0225045	0.0399326	0.395698
698	34568	RUNX1	SEM	Pre-B Lymphocyte	None	0.0508083	0.0859437	0.0228518	0.0400287	0.395698
699	43763	BRD4	DND-41	T Lymphocyte	Blood	0.0660459	0.0232845	0.0590286	0.0400345	0.395698
700	58188	BANF1	None	Keratinocyte	None	0.0384673	0.0396503	0.0422899	0.0400736	0.395698
701	50565	MYB	Jurkat	T Lymphocyte	Blood	0.0473038	0.0523233	0.0290232	0.0401713	0.396097
702	62980	ZBED1	GM12878	B Lymphocyte	Blood	0.0353459	0.0424148	0.0441003	0.0402467	0.396275
703	70756	MYC	LNCaP	None	LNCaP cells	0.0486185	0.0318468	0.0446995	0.0403624	0.396849
704	65079	ZNF317	HEK293	Epithelium	Embryonic Kidney	0.0268055	0.0378687	0.0941079	0.0404237	0.396887
705	4965	RELA	GM18951	Lymphoblastoid	Blood	0.0680572	0.0238995	0.0572302	0.0405856	0.397912
706	58342	MED1	LNCaP-abl	Epithelium	Prostate	0.0436892	0.0376006	0.0417671	0.040858	0.399021
707	50367	SPI1	None	Monocyte	None	0.0365442	0.0333225	0.0624478	0.0408968	0.399021
708	46269	YY1	K562	Erythroblast	Bone Marrow	0.0525449	0.0489202	0.0295425	0.0409304	0.399021
709	46300	SP1	K562	Erythroblast	Bone Marrow	0.043803	0.0381668	0.0413147	0.0409649	0.399021
710	48641	SPI1	OCI-Ly3	B Lymphocyte	Bone Marrow	0.0430941	0.0348057	0.0470948	0.0410042	0.399021
711	1374	CEBPA	HepG2	Epithelium	Liver	0.022895	0.118498	0.0475436	0.0411348	0.399021
712	37578	ELF1	ME-1	Leukemia Cell	None	0.112909	0.0475828	0.0231542	0.0411745	0.399021
713	68712	BRD4	IMR90	None	None	0.0640153	0.0292045	0.0435222	0.0412111	0.399021
714	42462	STAG1	GM19238	Lymphoblastoid	Blood	0.0727564	0.0257759	0.0496717	0.0413268	0.399021
715	69619	CTCF	None	Erythroid Cell	None	0.0738358	0.0481843	0.0261213	0.041379	0.399021
716	63479	CTCF	MM.1S	B Lymphoblast	Blood	0.100366	0.0222285	0.0565247	0.0414025	0.399021
717	35855	CTCF	GM19238	Lymphoblastoid	Blood	0.0731291	0.0493941	0.0259233	0.0414279	0.399021
718	63038	ZNF121	HEK293	Epithelium	Embryonic Kidney	0.030769	0.0454922	0.0557998	0.0414493	0.399021
719	69800	NR1H3	HT29	colorectal adenocarcinoma	None	0.0303031	0.08366	0.0370456	0.0417472	0.400393
720	57092	HEXIM1	HCT-116	None	Colon	0.0583866	0.233304	0.0196694	0.0418912	0.400393
721	45801	MAFF	HepG2	Epithelium	Liver	0.0582114	0.0269176	0.0578301	0.0419204	0.400393
722	1742	GATA2	None	Endothelial Cell	Umbilical Vein	0.0334654	0.0392197	0.0618093	0.041941	0.400393
723	51603	TAL1	HUES64	Embryonic Stem Cell	Embryo	0.0405257	0.0427635	0.0426763	0.0419627	0.400393
724	73932	ZNF680	293T	None	None	0.0436806	0.0366482	0.0469287	0.0419672	0.400393
725	33597	FAIRE	K562	Erythroblast	Bone Marrow	0.0441223	0.0504132	0.0346636	0.0420527	0.400393
726	46347	USF1	SK-N-SH	Neuroblastoma cell	Brain	0.0435768	0.0346483	0.0511872	0.0420552	0.400393
727	74904	CTCF	THP-1	Monocyte	None	0.0634813	0.0526303	0.0275324	0.0422429	0.40077
728	42312	STAG1	GM12890	Lymphoblastoid	Blood	0.130897	0.0222439	0.0537307	0.0422898	0.40077
729	64279	ZNF592	MCF-7	Epithelium	Breast	0.0415611	0.0437703	0.0419491	0.0424054	0.40077
730	63826	GLIS2	HEK293	Epithelium	Embryonic Kidney	0.0448918	0.0636656	0.0304936	0.0424104	0.40077
731	8122	MYC	NHEK	Keratinocyte	Skin	0.0372151	0.0472577	0.04415	0.0424465	0.40077
732	65162	ZNF549	HEK293	Epithelium	Embryonic Kidney	0.0365649	0.0486102	0.0439496	0.0424521	0.40077
733	65041	DNMT1	K562	Erythroblast	Bone Marrow	0.0419649	0.040548	0.0452559	0.0425006	0.40077
734	58189	TP63	None	Keratinocyte	None	0.0384024	0.0317715	0.0772512	0.042617	0.40092
735	38173	SND1	Mutu III	B Lymphocyte	None	0.0490893	0.0427632	0.0375683	0.0426326	0.40092
736	8789	PHF8	K562	Erythroblast	Bone Marrow	0.0456169	0.0453725	0.0380533	0.0427122	0.401124
737	36250	GATA2	None	Haematopoietic Progenitor Cell	Blood	0.0465929	0.0369558	0.0462831	0.0427819	0.401233
738	69456	TP53	None	None	Foreskin	0.0475633	0.0374184	0.0451016	0.0429079	0.40187
739	43741	CDK9	MM1.S	B Lymphocyte	Blood	0.039546	0.0398656	0.052552	0.0432323	0.403523
740	52637	ESR1	MCF-7	Epithelium	Breast	0.048886	0.0336384	0.0520524	0.0432408	0.403523
741	65204	YY1	HEK293	Epithelium	Embryonic Kidney	0.0758738	0.137294	0.0203369	0.0432975	0.403523
742	67801	BRD4	SUM1315MO2	None	None	0.0436973	0.042706	0.0435641	0.043318	0.403523
743	48451	BRD4	MCF-7	Epithelium	Breast	0.049373	0.0406675	0.041387	0.0434767	0.40412
744	42707	ARNT2	LoVo	None	Colon	0.0493389	0.034613	0.0505457	0.0435225	0.40412
745	70811	SP1	HCT-116	Colon cancer cell	Colon	0.0606204	0.137623	0.0220266	0.0435656	0.40412
746	67458	E2F1	None	Mesenchymal Stem Cell	Umbilical Cord	0.0550735	0.0352749	0.0449077	0.0436302	0.40412
747	62931	ZNF341	HEK293	Epithelium	Embryonic Kidney	0.0592893	0.0292504	0.056647	0.0436933	0.40412
748	1226	TRRAP	HeLa	Epithelium	Cervix	0.0415663	0.0513574	0.0400495	0.0438	0.40412
749	50991	CTCF	H1	Embryonic Stem Cell	Embryo	0.0665617	0.122258	0.0220256	0.043898	0.40412
750	47276	KDM5B	SUM185PE	Epithelium	Mammary Gland	0.0788269	0.16681	0.0199903	0.0439534	0.40412
751	5459	CEBPB	LS180	Epithelium	Colon	0.0687717	0.0585117	0.0273136	0.0440087	0.40412
752	65115	MAZ	HEK293	Epithelium	Embryonic Kidney	0.0830166	0.0782142	0.0230353	0.0440724	0.40412
753	36312	RELA	GM12892	Lymphoblastoid	Blood	0.046974	0.0363213	0.051934	0.0440751	0.40412
754	52615	RELA	MCF-7	Epithelium	Breast	0.0441991	0.0425499	0.0458505	0.044159	0.40412
755	69541	RUNX1	Kasumi-1	Myeloblast	Blood	0.0447689	0.0374202	0.053245	0.0442266	0.40412
756	45938	JUN	K562	Erythroblast	Bone Marrow	0.0476706	0.0451869	0.0406095	0.0442932	0.40412
757	71873	SMC1A	HepG2	hepatocellular carcinoma	None	0.0543401	0.0331458	0.0523396	0.0443421	0.40412
758	44144	PHF6	Jurkat	T Lymphocyte	Blood	0.0461134	0.0424801	0.04469	0.0443774	0.40412
759	45867	MAZ	IMR90	Fibroblast	Lung	0.103369	0.0586836	0.0243851	0.0444142	0.40412
760	45750	E2F1	HeLa-S3	Epithelium	Cervix	0.0525916	0.0642303	0.0303235	0.0444344	0.40412
761	53633	STAT5B	None	T Lymphocyte	Blood	0.0472539	0.041823	0.0448452	0.04453	0.404456
762	53013	E2F1	LNCaP-abl	Epithelium	Prostate	0.0831642	0.0438233	0.0307994	0.0446217	0.404758
763	70753	MYC	LNCaP	None	LNCaP cells	0.106756	0.0257336	0.0529519	0.0448151	0.405802
764	44333	E2F1	LNCaP	Epithelium	Prostate	0.0563576	0.0478946	0.0353644	0.0448543	0.405802
765	42900	RELA	AC16	Cardiomyocyte	None	0.046971	0.0407008	0.0482312	0.0450516	0.406605
766	69813	NELFE	MCF-7	Human Breast Cancer Cell	Breast	0.0546888	0.0377987	0.045948	0.0451164	0.406605
767	71212	FOXA1	LNCaP	Epithelium	Prostate	0.223789	0.0186004	0.111056	0.0451196	0.406605
768	45920	HMGN3	K562	Erythroblast	Bone Marrow	0.0735249	0.0387439	0.0373153	0.0453413	0.408071
769	74688	GRHL3	NHEK	Keratinocyte	Skin	0.0607596	0.203904	0.0222281	0.0455667	0.409252
770	45814	CEBPB	HepG2	Epithelium	Liver	0.0435804	0.116114	0.029151	0.0456698	0.409252
771	58319	MED1	LNCaP-abl	Epithelium	Prostate	0.0500042	0.036192	0.0553725	0.0456807	0.409252
772	42505	CTCF	GM2255	Lymphoblastoid	Blood	0.0658663	0.0970351	0.0248419	0.0457496	0.409252
773	50690	MED1	hMADS-3	Adipocyte	Adipose	0.0459019	0.0353088	0.0646479	0.0457685	0.409252
774	45894	MYC	K562	Erythroblast	Bone Marrow	0.0479553	0.0364596	0.0585186	0.0459055	0.409517
775	65179	EGR2	HEK293	Epithelium	Embryonic Kidney	0.09604	0.0724157	0.0242909	0.0460074	0.409517
776	71197	RELA	LNCaP	Epithelium	Prostate	0.0463313	0.0459304	0.0457708	0.0460096	0.409517
777	43756	BRD4	DND-41	T Lymphocyte	Blood	0.0515063	0.0388455	0.0499579	0.0460351	0.409517
778	46150	RAD21	GM12878	B Lymphocyte	Blood	0.0820924	0.034452	0.0421967	0.0462681	0.410223
779	58334	MED1	LNCaP-abl	Epithelium	Prostate	0.0471873	0.0451469	0.0465217	0.0462697	0.410223
780	53467	KDM1A	SH-SY5Y	None	Bone Marrow	0.055304	0.0344354	0.0567747	0.0463603	0.410223
781	75275	ZBTB48	U2OS	None	None	0.0472292	0.207558	0.02551	0.0463627	0.410223
782	73544	MED1	SUM159PT	mammary carcinoma cell line	Breast	0.0440758	0.0483327	0.0470523	0.0464178	0.410223
783	74358	OTX2	D-341	None	None	0.0342365	0.0507044	0.0642291	0.0465345	0.410223
784	55492	RUNX1	None	Myeloid Cell	None	0.0528189	0.071679	0.0316506	0.0465665	0.410223
785	42722	HOXA6	LoVo	None	Colon	0.0740028	0.0296576	0.0580245	0.0465893	0.410223
786	45888	JUN	K562	Erythroblast	Bone Marrow	0.0792429	0.0300175	0.0542926	0.0466753	0.410458
787	67765	SPI1	None	Hematopoietic stem and progenitor cell	Fetal Liver	0.0482803	0.0385999	0.0571806	0.0468051	0.410965
788	73696	LEO1	SEM	B Lymphocyte	None	0.0744191	0.0344222	0.046832	0.0470272	0.410965
789	9320	NIPBL	LCL	Lymphoblastoid	Blood	0.0486499	0.0600814	0.0375998	0.0470384	0.410965
790	48634	SPIB	H929	B Lymphocyte	Bone Marrow	0.0898494	0.0260663	0.0695972	0.047085	0.410965
791	9322	MEIS1	SEM	Pre-B Lymphocyte	None	0.0436234	0.0532069	0.0455007	0.0471014	0.410965
792	36765	NOTCH1	HPB-ALL	T Lymphocyte	Blood	0.0898331	0.030467	0.05045	0.0471122	0.410965
793	55775	CTCFL	Delta47	None	None	0.128455	0.0545627	0.0264945	0.0471492	0.410965
794	5194	HMGN1	None	T Lymphocyte	Blood	0.0409151	0.0540862	0.0486868	0.0472716	0.411513
795	42353	CTCF	GM18486	Lymphoblastoid	Blood	0.124723	0.0384247	0.0340083	0.0474211	0.412296
796	46268	GABPA	K562	Erythroblast	Bone Marrow	0.0758908	0.0346977	0.0471686	0.0475082	0.412533
797	64987	RFX1	K562	Erythroblast	Bone Marrow	0.04074	0.0489169	0.0553669	0.0475869	0.412699
798	43364	EBNA3C	None	B Lymphocyte	None	0.0433659	0.0522689	0.0482939	0.0476984	0.413147
799	50878	SPI1	None	None	None	0.0589912	0.0494084	0.0395984	0.0480523	0.415365
800	55338	SUMO2	K562	Erythroblast	Bone Marrow	0.0367835	0.0875016	0.0419365	0.0480871	0.415365
801	45934	CUX1	K562	Erythroblast	Bone Marrow	0.0598381	0.0322217	0.0683461	0.0481347	0.415365
802	77142	ZNF300	293T	None	None	0.0484893	0.0479224	0.0483471	0.0482517	0.415611
803	46340	FOXP2	SK-N-MC	None	Brain	0.0504757	0.0382326	0.0617872	0.0482835	0.415611
804	670	NR2C2	GM12878	B Lymphocyte	Blood	0.0486592	0.0490924	0.0476955	0.0484753	0.416
805	70561	MYC	U2OS	None	Bone	0.0754499	0.0742335	0.0283747	0.0484972	0.416
806	67495	GATA3	MDA-MB-231	Epithelium	Mammary Gland	0.0509322	0.0458754	0.0489893	0.0485093	0.416
807	73235	IKZF1	None	B cell precursor	None	0.0501438	0.0421689	0.0559555	0.0487634	0.417284
808	65170	ZNF121	HEK293	Epithelium	Embryonic Kidney	0.0395136	0.0477964	0.0653922	0.0487797	0.417284
809	65040	DNMT1	K562	Erythroblast	Bone Marrow	0.0492232	0.048371	0.04995	0.049173	0.419935
810	45688	ZNF143	H1	Embryonic Stem Cell	Embryo	0.0869862	0.0656701	0.0291106	0.0492112	0.419935
811	36710	CDX2	COLO-320	Epithelium	Colon	0.0497264	0.0479634	0.0504114	0.0493455	0.420362
812	76815	NEUROG2	None	Fibroblast	Fetal Lung	0.0433784	0.0903432	0.0375443	0.0494393	0.420362
813	54051	ESR1	T47D	Epithelium	Mammary Gland	0.0488543	0.0496202	0.0498985	0.0494537	0.420362
814	64290	ZBTB11	K562	Erythroblast	Bone Marrow	0.0537367	0.0368985	0.0670224	0.0495044	0.420362
815	69798	PPARG	HT29	colorectal adenocarcinoma	None	0.051475	0.0790429	0.0353333	0.0497309	0.421522
816	45790	HNF4A	HepG2	Epithelium	Liver	0.0420408	0.0537849	0.0558204	0.049763	0.421522
817	64871	ZBTB49	HEK293	Epithelium	Embryonic Kidney	0.05011	0.0492735	0.0501943	0.0498558	0.421791
818	44695	LANA	None	Endothelial Cell	None	0.0526763	0.0496873	0.047861	0.0499977	0.422474
819	8116	MYC	K562	Erythroblast	Bone Marrow	0.0455373	0.0412321	0.0742431	0.0502947	0.424014
820	52158	FAIRE	None	Macrophage	None	0.0570335	0.043602	0.0521458	0.0503026	0.424014
821	73507	BRD4	SUM159PT	mammary carcinoma cell line	Breast	0.0697461	0.0376293	0.0547645	0.0507274	0.424637
822	58348	MED1	LNCaP-abl	Epithelium	Prostate	0.0510168	0.0475093	0.0541611	0.0507512	0.424637
823	50876	SPI1	None	None	None	0.0802378	0.034799	0.0557024	0.0507695	0.424637
824	57640	IKZF1	Nalm6	B cell precursor	Blood	0.059784	0.0383131	0.0615943	0.050814	0.424637
825	46337	REST	PFSK-1	Neuron	Brain	0.0535999	0.0782538	0.0361855	0.0508308	0.424637
826	68969	PR	T47D	None	Breast	0.048977	0.0524224	0.0513199	0.0508658	0.424637
827	67929	SPI1	None	Macrophage	Blood	0.0922881	0.0324793	0.057477	0.0509127	0.424637
828	49183	EMX1	HeLa	Epithelium	Cervix	0.0494808	0.0528757	0.0507036	0.050982	0.424637
829	7060	YY1	GM12878	B Lymphocyte	Blood	0.0768498	0.077154	0.0303643	0.051018	0.424637
830	55297	TEAD4	MDA-MB-231	Epithelium	Breast	0.0711016	0.0323345	0.0722522	0.0510581	0.424637
831	46140	TCF7L1	GM12878	B Lymphocyte	Blood	0.0757164	0.0317414	0.0708094	0.0510632	0.424637
832	73234	IKZF1	None	B cell precursor	None	0.0536521	0.0390776	0.0690042	0.0511138	0.424637
833	45752	E2F4	HeLa-S3	Epithelium	Cervix	0.08393	0.0357023	0.0534733	0.0512293	0.424918
834	55298	TEAD4	MDA-MB-231	Epithelium	Breast	0.0648614	0.0365618	0.0637722	0.051359	0.424918
835	41291	STAT1	None	Monocyte	Blood	0.0555452	0.0473244	0.0519324	0.0513807	0.424918
836	48315	SPI1	GM12878	B Lymphocyte	Blood	0.0666628	0.0453314	0.0468862	0.0513934	0.424918
837	77536	REL	GM12878	Lymphoblastoid	None	0.0578457	0.0432338	0.0567793	0.051706	0.425017
838	71021	CLOCK	U2OS	Osteosarcoma cell	None	0.0522843	0.0516794	0.0513053	0.0517532	0.425017
839	45713	CTCF	None	Epithelium	None	0.063376	0.0520399	0.0439696	0.0519694	0.425017
840	2655	PAX3	Rh4	None	Muscle	0.056004	0.0424118	0.0615565	0.0520233	0.425017
841	57671	CBX2	K562	Erythroblast	Bone Marrow	0.0518907	0.0492101	0.0554253	0.0520531	0.425017
842	53595	MED1	None	Adipocyte	None	0.0596783	0.0402027	0.0627044	0.0521217	0.425017
843	74651	BATF3	GM12878	B Lymphocyte	Blood	0.0564376	0.0506008	0.0498136	0.0521245	0.425017
844	52616	RELA	MCF-7	Epithelium	Breast	0.0529597	0.0483347	0.0556922	0.0521509	0.425017
845	58936	NRF1	None	Epithelium	None	0.0918721	0.068148	0.0314335	0.0523948	0.425017
846	58031	RUNX1	Kasumi-1	Myeloblast	Blood	0.0486493	0.0499178	0.0600574	0.0524161	0.425017
847	75561	BRD4	None	None	Retina	0.0588852	0.0875655	0.0347271	0.0525215	0.425017
848	62529	ZNF175	K562	Erythroblast	Bone Marrow	0.0518598	0.049852	0.0564238	0.0525728	0.425017
849	72949	MED1	MHH-MED-1	Cardiomyocyte	None	0.0519493	0.0519208	0.0539771	0.0525985	0.425017
850	45504	CTCF	NHLF	Fibroblast	Lung	0.119627	0.0300453	0.0642209	0.0526078	0.425017
851	33602	FAIRE	HepG2	Epithelium	Liver	0.0558576	0.0510077	0.051273	0.0526223	0.425017
852	38785	NIPBL	LoVo	None	Colon	0.0520029	0.0531303	0.0531427	0.0527532	0.425017
853	69758	BRD4	MV4;11	Leukemia Cell	Blood	0.0873394	0.0381672	0.0519586	0.0527868	0.425017
854	4961	RELA	GM10847	Lymphoblastoid	Blood	0.0588568	0.0374077	0.0761607	0.0528109	0.425017
855	50382	TAL1	None	Proerythroblast	Fetal Liver	0.0399796	0.0458056	0.100168	0.0528766	0.425017
856	59005	LYL1	NB4	Promyelocytic cell	Blood	0.0479138	0.0556009	0.055937	0.0528814	0.425017
857	65084	SP2	HEK293	Epithelium	Embryonic Kidney	0.0924788	0.0946727	0.0281814	0.0529364	0.425017
858	64350	SP1	MCF-7	Epithelium	Breast	0.0526616	0.0528862	0.0533075	0.0529504	0.425017
859	45228	KDM4A	H1	Embryonic Stem Cell	Embryo	0.0495916	0.0892858	0.0395134	0.0529962	0.425017
860	8816	KDM4A	H1	Embryonic Stem Cell	Embryo	0.0495916	0.0892858	0.0395134	0.0529962	0.425017
861	73984	CD34	None	None	Thymus	0.080345	0.0444908	0.046249	0.0530921	0.425017
862	76925	CD74	None	B Lymphocyte	None	0.0518849	0.0512764	0.0567091	0.0531836	0.425017
863	4940	RELA	GM19193	Lymphoblastoid	Blood	0.0663092	0.0352145	0.0781202	0.0533675	0.425017
864	65129	ZNF341	HEK293	Epithelium	Embryonic Kidney	0.0609783	0.0564356	0.045349	0.0534174	0.425017
865	45999	FOS	MCF-10A	Epithelium	Breast	0.0600347	0.0588412	0.0444319	0.05343	0.425017
866	77130	ZNF398	293T	None	None	0.053349	0.0538874	0.053081	0.0534371	0.425017
867	54676	YAP1	NCI-H2052	Epithelium	Lung	0.0576406	0.0342559	0.103567	0.0534954	0.425017
868	69811	NELFE	MCF-7	Human Breast Cancer Cell	Breast	0.0653553	0.0431695	0.0567383	0.0535003	0.425017
869	45836	CTCF	None	Epithelium	Mammary Gland	0.0963264	0.0428541	0.0445931	0.0535107	0.425017
870	68819	GATA2	None	Erythroid progenitor	Bone Marrow	0.0554137	0.0433279	0.067259	0.053594	0.425017
871	73710	KMT2A	None	None	Spleen	0.0598669	0.0466122	0.0561243	0.0536012	0.425017
872	69878	CDK9	None	Th2	None	0.0733779	0.045618	0.04909	0.0536707	0.425017
873	1743	GATA2	None	Endothelial Cell	Umbilical Vein	0.0357953	0.0536381	0.106193	0.0536854	0.425017
874	49951	KLF9	GBM1B	Glioblastoma Stem Cell	None	0.0579808	0.0484887	0.0556952	0.0537421	0.425017
875	77065	ZNF674	293T	None	None	0.0551207	0.0530098	0.0536505	0.0539128	0.425329
876	67585	MYC	None	Fibroblast	Foreskin	0.0504921	0.0583809	0.0536704	0.0539915	0.425329
877	62639	RNF2	K562	Erythroblast	Bone Marrow	0.0526459	0.0467853	0.0657853	0.0539964	0.425329
878	46196	TAF1	H1	Embryonic Stem Cell	Embryo	0.062832	0.0850169	0.0358149	0.0540276	0.425329
879	4514	RUNX1	None	Megakaryocyte	Cord blood	0.101591	0.0288621	0.0898925	0.0541304	0.425654
880	48127	MBD2	MCF-7	Epithelium	Breast	0.0615748	0.0588642	0.0452946	0.054253	0.425721
881	5042	CTCF	GM12891	Lymphoblastoid	Blood	0.0566433	0.120999	0.0338618	0.0542622	0.425721
882	45746	MAFK	HeLa-S3	Epithelium	Cervix	0.15346	0.0239126	0.136139	0.0543741	0.426086
883	42775	NPAT	LoVo	None	Colon	0.06522	0.0442936	0.0581121	0.0544433	0.426086
884	69764	BRD4	MV4;11	Leukemia Cell	Blood	0.0609114	0.0479531	0.0562221	0.0544937	0.426086
885	37305	CREB1	A549	Epithelium	Lung	0.0535475	0.0673795	0.0466778	0.0546177	0.426546
886	67836	BRD4	LP-1	None	None	0.0583731	0.0482828	0.0587676	0.0546905	0.426546
887	67714	CREB1	LNCaP	Epithelium	Prostate	0.0950947	0.0530625	0.0391806	0.0547375	0.426546
888	42637	CREBBP	HEK293	Epithelium	Embryonic Kidney	0.0576112	0.160688	0.0321049	0.0551062	0.428183
889	50415	KLF11	hMADS-3	Adipocyte	Adipose	0.09469	0.072172	0.0332614	0.0551815	0.428183
890	47601	KLF5	KATO III	None	Stomach	0.0738593	0.0834214	0.0346133	0.0552183	0.428183
891	62761	PKNOX1	K562	Erythroblast	Bone Marrow	0.0798499	0.0376137	0.0655304	0.0552364	0.428183
892	45847	CTCF	None	Epithelium	None	0.105804	0.0376809	0.0543224	0.0552574	0.428183
893	2090	MYC	K562	Erythroblast	Bone Marrow	0.0645066	0.0409098	0.0705282	0.0554598	0.42879
894	45870	MYC	K562	Erythroblast	Bone Marrow	0.0645066	0.0409098	0.0705282	0.0554598	0.42879
895	36839	FAIRE	K562	Erythroblast	Bone Marrow	0.0576639	0.0617237	0.0490466	0.055631	0.428945
896	69617	BRD4	Jurkat	T Lymphocyte	Blood	0.0872551	0.0421628	0.0532711	0.0556611	0.428945
897	2685	ZNF711	SH-SY5Y	None	Bone Marrow	0.0545985	0.0557562	0.0566824	0.0556661	0.428945
898	54052	ESR1	T47D	Epithelium	Mammary Gland	0.0554272	0.056042	0.056042	0.0558356	0.429426
899	72358	RUNX1	Kasumi-1	Acute myeloid leukemia	None	0.081339	0.0486483	0.0478535	0.0558528	0.429426
900	48757	CTCF	PC-3	Epithelium	Prostate	0.184036	0.0271698	0.0847908	0.0559728	0.429871
901	62919	ZSCAN29	K562	Erythroblast	Bone Marrow	0.0498731	0.0658219	0.0547593	0.0560771	0.430194
902	35832	CTCF	GM19240	Lymphoblastoid	Blood	0.11023	0.0814345	0.0311434	0.0563053	0.430881
903	46303	YY1	K562	Erythroblast	Bone Marrow	0.0696075	0.0495048	0.0534197	0.0563126	0.430881
904	56252	E2F1	None	Epithelium	Mammary Gland	0.0888234	0.0595234	0.0396197	0.0563537	0.430881
905	57283	CTCF	None	None	Embryonic Kidney	0.240282	0.0216892	0.248463	0.0564921	0.431204
906	48343	SNAI2	None	Keratinocyte	None	0.103864	0.0502312	0.0423153	0.0565206	0.431204
907	46334	TAF1	PFSK-1	Neuron	Brain	0.128817	0.0342507	0.0615974	0.056594	0.431287
908	75273	ZBTB48	U2OS	None	None	0.0568503	0.0967039	0.0401021	0.0568292	0.432077
909	65085	ZNF134	HEK293	Epithelium	Embryonic Kidney	0.0646414	0.0494422	0.058522	0.0568437	0.432077
910	64576	MAFG	K562	Erythroblast	Bone Marrow	0.128193	0.0307679	0.0792006	0.0569238	0.432077
911	65137	ZBTB18	HEK293	Epithelium	Embryonic Kidney	0.0577705	0.0561794	0.0569151	0.0569477	0.432077
912	35298	ERG	SKNO-1	Myeloblast	Bone Marrow	0.0588594	0.0934668	0.0402643	0.0571927	0.433461
913	37621	CBFB	U937	None	Pleura	0.0678659	0.0645822	0.0453606	0.0574205	0.43471
914	63916	H3F3A	MM.1S	B Lymphoblast	Blood	0.0585279	0.0584003	0.0556766	0.0575047	0.434872
915	37639	ERG	K562	Erythroblast	Bone Marrow	0.0700184	0.111254	0.0344993	0.0575682	0.434875
916	45622	CTCF	GM12878	B Lymphocyte	Blood	0.0961804	0.0487332	0.047315	0.0577057	0.435071
917	5454	BCAT1	LS180	Epithelium	Colon	0.0688895	0.0407237	0.0780241	0.0578687	0.435071
918	69869	MED1	MHH-MED-1	Th1	None	0.0763303	0.0505786	0.0527657	0.0579106	0.435071
919	46000	E2F4	MCF-10A	Epithelium	Breast	0.123349	0.05	0.041992	0.057936	0.435071
920	49738	LMO2	Kasumi-1	Myeloblast	Blood	0.0586844	0.0553508	0.0599796	0.057939	0.435071
921	62647	MCM5	K562	Erythroblast	Bone Marrow	0.0579189	0.0580775	0.0579189	0.0579716	0.435071
922	2464	RARA	NB4	Promyelocytic cell	Blood	0.059623	0.0545348	0.0604228	0.0580744	0.435369
923	73513	BRD4	SUM159PT	mammary carcinoma cell line	Breast	0.10455	0.0299959	0.112203	0.0581699	0.435612
924	45871	ATF1	K562	Erythroblast	Bone Marrow	0.053996	0.0849705	0.0471516	0.0582985	0.435856
925	5050	CTCF	GM19239	Lymphoblastoid	Blood	0.118274	0.108054	0.0294588	0.058383	0.435856
926	41283	CTCF	IMR90	Fibroblast	Lung	0.102728	0.0450095	0.0515224	0.0585008	0.435856
927	33875	MED1	None	Plasma Cell	None	0.0832854	0.0403886	0.068666	0.0585098	0.435856
928	33150	GATA3	MCF-7	Epithelium	Breast	0.0646283	0.0411288	0.0873662	0.058622	0.435856
929	8479	RUNX1	Kasumi-1	Myeloblast	Blood	0.0529803	0.0556049	0.0698138	0.0586231	0.435856
930	58806	MYB	None	Th2	None	0.0614079	0.058677	0.0560849	0.0586438	0.435856
931	54029	ESR1	MCF-7	Epithelium	Breast	0.0544819	0.0535301	0.0719878	0.0589203	0.43744
932	5458	CEBPB	LS180	Epithelium	Colon	0.189334	0.0285312	0.0916666	0.0590678	0.438065
933	33595	FAIRE	GM12878	B Lymphocyte	Blood	0.0626748	0.0584884	0.0567669	0.0592094	0.438644
934	58999	LYL1	Kasumi-1	Myeloblast	Blood	0.0515312	0.0624869	0.066256	0.0594115	0.439671
935	53256	FOXM1	HEK293	Epithelium	Embryonic Kidney	0.0715981	0.0578629	0.0521713	0.0595162	0.439974
936	76468	PHF2	None	N8-CTx	None	0.0612352	0.0678803	0.0520958	0.0597007	0.440545
937	46298	EGR1	K562	Erythroblast	Bone Marrow	0.100205	0.0537979	0.0460564	0.0597487	0.440545
938	35290	BRDU	HeLa-S3	Epithelium	Cervix	0.061913	0.0585206	0.0594415	0.059925	0.440545
939	71748	SOX4	None	Fibroblast	Fetal Lung	0.0766643	0.0573375	0.051043	0.0599302	0.440545
940	64446	OVOL3	HEK293	Epithelium	Embryonic Kidney	0.05965	0.0586788	0.0617188	0.0599896	0.440545
941	45904	STAT1	K562	Erythroblast	Bone Marrow	0.0599567	0.0476609	0.0808922	0.0600072	0.440545
942	71229	RELA	LNCaP	Epithelium	Prostate	0.0512088	0.0660517	0.0658994	0.0602003	0.440545
943	46029	CTCF	RPTEC	Epithelium	Kidney	0.110832	0.0391346	0.0652364	0.0602545	0.440545
944	65151	SP1	HEK293	Epithelium	Embryonic Kidney	0.0883762	0.083799	0.0375716	0.0602799	0.440545
945	72406	PARP1	MCF-7	Human Breast Cancer Cell	Breast	0.0666956	0.0586149	0.0566512	0.0603586	0.440545
946	46338	REST	PFSK-1	Neuron	Brain	0.0632596	0.0919889	0.043333	0.0603654	0.440545
947	46329	SIN3A	PANC-1	None	Pancreas	0.0642014	0.0643113	0.0538751	0.0603832	0.440545
948	4632	KAT5	None	T Lymphocyte	Blood	0.0652062	0.062914	0.0544179	0.0604798	0.440545
949	68711	BRD4	IMR90	None	None	0.074217	0.071529	0.045095	0.0604858	0.440545
950	74647	ETV6	GM12878	B Lymphocyte	Blood	0.0779808	0.040869	0.0821939	0.0607342	0.440607
951	46323	ELF1	MCF-7	Epithelium	Breast	0.0717064	0.0647691	0.0501369	0.0608311	0.440607
952	45884	GATA1	K562	Erythroblast	Bone Marrow	0.0931117	0.0318148	0.136917	0.0609636	0.440607
953	53305	RUNX1	TSU-1621-MT	None	None	0.101621	0.0357707	0.0867389	0.0609912	0.440607
954	67802	BRD4	SUM1315MO2	None	None	0.0612864	0.0606463	0.0611463	0.0610251	0.440607
955	37584	TBP	ME-1	Leukemia Cell	None	0.132398	0.0552949	0.0422317	0.0610272	0.440607
956	49870	ELF1	SK-N-MC	None	Brain	0.0909195	0.04305	0.0669284	0.0610875	0.440607
957	48778	MYC	P493-6	B cell lymphoma	None	0.0529228	0.0702338	0.0625776	0.0610929	0.440607
958	75848	CTCF	Rh4	rhabdomyosarcoma	None	0.0804667	0.057934	0.051739	0.0612311	0.440607
959	63406	POLR2AphosphoS5	None	iPSC	None	0.0704925	0.108569	0.0389586	0.0612866	0.440607
960	43099	RUNX1	CUTLL1	T Lymphocyte	Blood	0.0842319	0.0607993	0.0484092	0.0612936	0.440607
961	48826	MBD2	MCF-7	Epithelium	Breast	0.0702647	0.0597214	0.0564864	0.061634	0.440607
962	64047	CTCF	None	Neuron	None	0.094204	0.0409977	0.0730995	0.0617165	0.440607
963	34476	PAX5	Namalwa	B Lymphocyte	None	0.0740733	0.0489039	0.0681381	0.0617225	0.440607
964	36077	MYOD1	None	None	Muscle	0.0472001	0.0907547	0.0609149	0.061759	0.440607
965	75840	MYCN	Rh4	rhabdomyosarcoma	None	0.0687632	0.0499045	0.0715574	0.0618051	0.440607
966	64820	TRIM24	K562	Erythroblast	Bone Marrow	0.0448015	0.0699512	0.0839884	0.0618825	0.440607
967	38489	RB1	IMR90	Fibroblast	Lung	0.0615668	0.0624265	0.0617578	0.0619149	0.440607
968	50398	MYB	Jurkat	T Lymphocyte	Blood	0.06156	0.0767566	0.0522142	0.061972	0.440607
969	58302	BCL6	None	B Lymphocyte	Tonsil	0.0568598	0.0581432	0.0734209	0.0619862	0.440607
970	64319	DPF2	K562	Erythroblast	Bone Marrow	0.0551889	0.0476587	0.107189	0.0620463	0.440607
971	71219	FOXA1	LNCaP	Epithelium	Prostate	0.149671	0.0359486	0.0711343	0.0620885	0.440607
972	36301	BRD4	None	T Lymphocyte	Blood	0.0618189	0.0616717	0.0628437	0.0621071	0.440607
973	45949	IRF1	K562	Erythroblast	Bone Marrow	0.100467	0.0460608	0.0598697	0.0621123	0.440607
974	8444	CEBPA	U937	None	Pleura	0.092114	0.0340681	0.120745	0.0621275	0.440607
975	49989	BRD4	GM12878	B Lymphocyte	Blood	0.0595532	0.0655191	0.0619267	0.0622386	0.440607
976	46358	PBX3	SK-N-SH	Neuroblastoma cell	Brain	0.0732005	0.123371	0.0377015	0.0623289	0.440607
977	64867	SIN3A	K562	Erythroblast	Bone Marrow	0.07444	0.0490514	0.0709102	0.0626291	0.440607
978	4931	SOX2	H1	Embryonic Stem Cell	Embryo	0.0669972	0.0669625	0.0555759	0.0626981	0.440607
979	42518	STAG1	GM2255	Lymphoblastoid	Blood	0.265682	0.0258506	0.158917	0.0627265	0.440607
980	64675	IRF1	K562	Erythroblast	Bone Marrow	0.0577518	0.0522614	0.0879365	0.0627751	0.440607
981	41475	BRD4	OCI-Ly1	B cell lymphoma	Bone Marrow	0.0919915	0.0345051	0.123106	0.0628019	0.440607
982	64654	FOXJ2	K562	Erythroblast	Bone Marrow	0.0694302	0.0554975	0.0652496	0.0628378	0.440607
983	36812	E2F4	MCF-7	Epithelium	Breast	0.0651529	0.0605517	0.0629921	0.0628433	0.440607
984	42689	LHX5	LoVo	None	Colon	0.0632979	0.0626322	0.0627981	0.0629082	0.440607
985	48825	MBD2	MCF-7	Epithelium	Breast	0.0771199	0.0644161	0.0520839	0.0629267	0.440607
986	57809	BRD4	LX2	Hepatic Stellate Cell	None	0.0834847	0.0478029	0.0676692	0.0629701	0.440607
987	74838	JMJD6	None	3565 cells	None	0.0604122	0.0845336	0.0520561	0.0630696	0.440607
988	40164	RUNX1T1	Kasumi-1	Myeloblast	Blood	0.0980924	0.0487751	0.0590987	0.0630764	0.440607
989	49949	KLF9	GBM1A	Glioblastoma Stem Cell	None	0.156392	0.159094	0.0283159	0.0631945	0.440607
990	56049	CREB1	HepG2	Epithelium	Liver	0.05964	0.0742572	0.0581909	0.0632761	0.440607
991	5049	CTCF	GM19238	Lymphoblastoid	Blood	0.0740193	0.0872693	0.0445417	0.0633356	0.440607
992	63105	ATF1	HepG2	Epithelium	Liver	0.0611054	0.0750074	0.0566463	0.063369	0.440607
993	39017	MED1	MM1.S	B Lymphocyte	Blood	0.147029	0.0465201	0.0520237	0.063383	0.440607
994	70812	SP1	HCT-116	Colon cancer cell	Colon	0.0842779	0.0780554	0.0441604	0.0634681	0.440607
995	73408	RBPJ	None	Neurosphere	None	0.0644901	0.0665455	0.0599104	0.0635271	0.440607
996	34392	MECP2	IMR90	Fibroblast	Lung	0.0647192	0.0742752	0.0546381	0.0635498	0.440607
997	50414	KLF11	hMADS-3	Adipocyte	Adipose	0.0769369	0.0750702	0.0479486	0.0636349	0.440607
998	62531	ZNF585B	HEK293	Epithelium	Embryonic Kidney	0.0665506	0.0539519	0.0737732	0.0636869	0.440607
999	45655	JUND	GM12878	B Lymphocyte	Blood	0.0677072	0.0586741	0.0655652	0.0637452	0.440607
1000	660	JUND	GM12878	B Lymphocyte	Blood	0.0677072	0.0586741	0.0655652	0.0637452	0.440607
1001	70928	RBBP4	T98G	Glioblastoma cell	None	0.0598005	0.0601828	0.0734787	0.0639088	0.441296
1002	45561	CTCF	AG04449	Fibroblast	Skin	0.164552	0.0338529	0.086478	0.0640134	0.441577
1003	38860	CASP8AP2	LoVo	None	Colon	0.0676072	0.0580543	0.0677767	0.064147	0.441656
1004	58315	MED1	LNCaP-abl	Epithelium	Prostate	0.066705	0.0641562	0.0625292	0.0644186	0.441656
1005	42331	STAG1	GM12891	Lymphoblastoid	Blood	0.133467	0.0356519	0.0892564	0.0644796	0.441656
1006	68230	NR3C1	BEAS-2B	Epithelium	Lung	0.0610139	0.0528458	0.0894139	0.0645654	0.441656
1007	2002	GATA2	K562	Erythroblast	Bone Marrow	0.0474707	0.0664338	0.0964478	0.0646119	0.441656
1008	45944	GATA2	K562	Erythroblast	Bone Marrow	0.0474707	0.0664338	0.0964478	0.0646119	0.441656
1009	64009	ZNF589	K562	Erythroblast	Bone Marrow	0.0565084	0.0856169	0.0588874	0.0647455	0.441656
1010	45592	CTCF	GM12865	B Lymphocyte	Blood	0.117429	0.043188	0.0676733	0.0647492	0.441656
1011	46283	MEF2A	K562	Erythroblast	Bone Marrow	0.0569546	0.0580192	0.086709	0.0647923	0.441656
1012	44875	5HMC	None	Erythroid Cell	None	0.119429	0.0347838	0.106526	0.0648134	0.441656
1013	45662	RELA	GM12891	Lymphoblastoid	Blood	0.0987892	0.0773681	0.042997	0.0649023	0.441656
1014	47577	SMAD3	NCI-H441	Epithelium	Lung	0.0626108	0.073884	0.0601042	0.0650208	0.441656
1015	67710	CREB1	LNCaP	Epithelium	Prostate	0.15075	0.0615037	0.0427669	0.0651149	0.441656
1016	45631	CTCF	GM12878	B Lymphocyte	Blood	0.105771	0.0790263	0.0416005	0.0651567	0.441656
1017	46164	RAD21	H1	Embryonic Stem Cell	Embryo	0.0709434	0.101003	0.0453429	0.0652482	0.441656
1018	71935	MYC	U2OS	None	Bone	0.0819939	0.0597707	0.0586744	0.0652821	0.441656
1019	45636	ELK1	GM12878	B Lymphocyte	Blood	0.0753673	0.0616773	0.0608518	0.0653468	0.441656
1020	68227	NR3C1	BEAS-2B	Epithelium	Lung	0.065975	0.0596746	0.0717955	0.0654457	0.441656
1021	76509	CREB1	KG1	Acute myeloid leukemia	None	0.0682385	0.0661079	0.0622712	0.0654463	0.441656
1022	8493	RUNX1	Kasumi-1	Myeloblast	Blood	0.0781608	0.0503025	0.0768913	0.0657148	0.441656
1023	44324	E2F1	LNCaP	Epithelium	Prostate	0.0946987	0.0646638	0.0509156	0.065759	0.441656
1024	45587	RELA	GM10847	Lymphoblastoid	Blood	0.0830981	0.0475002	0.080325	0.0659454	0.441656
1025	45892	JUN	K562	Erythroblast	Bone Marrow	0.0645321	0.10159	0.0494997	0.0659599	0.441656
1026	45633	MXI1	GM12878	B Lymphocyte	Blood	0.0930272	0.0436032	0.0843606	0.0659915	0.441656
1027	62841	SP3	HEK293	Epithelium	Embryonic Kidney	0.101479	0.0732493	0.0455226	0.06608	0.441656
1028	42442	STAG1	GM19193	Lymphoblastoid	Blood	0.182088	0.0316382	0.114445	0.0660871	0.441656
1029	55577	SPI1	None	B Lymphocyte	None	0.0883767	0.0439344	0.0878881	0.0661066	0.441656
1030	62981	ZBED1	GM12878	B Lymphocyte	Blood	0.06196	0.0664218	0.070598	0.0661411	0.441656
1031	63150	SRSF3	K562	Erythroblast	Bone Marrow	0.0614526	0.0682843	0.0692543	0.0661448	0.441656
1032	77119	ZNF442	293T	None	None	0.0660539	0.0662241	0.0662241	0.0661673	0.441656
1033	50077	ZFX	Daoy	Polygonal	Cerebellum	0.0610517	0.0794255	0.0611253	0.0661964	0.441656
1034	69884	T	None	Th1	None	0.10446	0.0421983	0.0824207	0.0662229	0.441656
1035	74903	CTCF	THP-1	Macrophage	None	0.0783229	0.102854	0.0437623	0.0662933	0.441656
1036	58640	MED1	LNCaP-abl	Epithelium	Prostate	0.0669175	0.0658545	0.0662332	0.0663322	0.441656
1037	73999	ESR1	None	None	endometrioid adenocarcinoma	0.0544278	0.0833466	0.0677494	0.0665024	0.441656
1038	59001	JMJD1C	HL-60	Promyeloblast	Blood	0.0868174	0.0476798	0.0790375	0.0665231	0.441656
1039	67749	GATA2	LNCaP	Epithelium	Prostate	0.0713559	0.0795177	0.0541166	0.0665909	0.441656
1040	46375	ESR1	T47D	Epithelium	Mammary Gland	0.0665414	0.0474985	0.110847	0.0666388	0.441656
1041	41481	E2F1	OCI-Ly1	B cell lymphoma	Bone Marrow	0.0944028	0.0579064	0.0582691	0.0666837	0.441656
1042	45950	MAFF	K562	Erythroblast	Bone Marrow	0.154432	0.0313542	0.143643	0.0668246	0.441656
1043	44316	E2F1	LNCaP	Epithelium	Prostate	0.122263	0.059404	0.0501393	0.0668863	0.441656
1044	33491	ESR1	MCF-7	Epithelium	Breast	0.0809966	0.0714802	0.0539581	0.0668901	0.441656
1045	38650	NFYA	LoVo	None	Colon	0.0725397	0.0627774	0.066136	0.0669152	0.441656
1046	74937	CUX1	K562	Leukemia Cell	None	0.0663915	0.0624141	0.0728939	0.0669642	0.441656
1047	45956	YY1	K562	Erythroblast	Bone Marrow	0.0532309	0.0987684	0.0628973	0.0670193	0.441656
1048	77173	ZNF141	293T	None	None	0.0637005	0.082103	0.059187	0.067023	0.441656
1049	38820	BARX2	LoVo	None	Colon	0.0697722	0.0636369	0.0681626	0.0670896	0.441656
1050	77131	ZNF383	293T	None	None	0.068185	0.0658304	0.0677246	0.0672313	0.441656
1051	45444	CTCF	None	Monocyte	Blood	0.103111	0.0506317	0.0656895	0.0672459	0.441656
1052	9199	TAL1	RPMI-8402	T cell leukemia	Blood	0.0643454	0.072142	0.0658108	0.0672704	0.441656
1053	45851	CTCF	None	Endothelial Cell	Umbilical Vein	0.109496	0.0546317	0.0581737	0.0673271	0.441656
1054	62908	NR2F2	None	None	Liver	0.0621005	0.0744582	0.0667647	0.0674043	0.441656
1055	45611	USF2	GM12878	B Lymphocyte	Blood	0.0751467	0.0680865	0.0607161	0.0674771	0.441656
1056	48299	REST	GM12878	B Lymphocyte	Blood	0.0790131	0.0593118	0.0672512	0.0676033	0.441656
1057	71319	RAD21	HCT-116	Colon cancer cell	Colon	0.0752234	0.0982284	0.0477502	0.0676361	0.441656
1058	75137	MYB	PF382	None	Blood	0.0868515	0.158692	0.0373139	0.0676531	0.441656
1059	77098	ZNF534	293T	None	None	0.0942798	0.0544862	0.0648901	0.0676669	0.441656
1060	73238	IKZF1	None	B cell precursor	None	0.0615145	0.0644629	0.0815024	0.0681378	0.443532
1061	2255	CTCF	MCF-7	Epithelium	Breast	0.10757	0.0605706	0.0547082	0.0681468	0.443532
1062	6574	CTCF	MCF-7	Epithelium	Breast	0.10757	0.0605706	0.0547082	0.0681468	0.443532
1063	37633	ERG	MCF-7	Epithelium	Breast	0.0947593	0.175754	0.0356117	0.0682165	0.443567
1064	50693	MED1	hMADS-3	Adipocyte	Adipose	0.120957	0.0403561	0.0909674	0.0683668	0.443816
1065	52436	WDR5	HEK293	Epithelium	Embryonic Kidney	0.146834	0.0427324	0.072198	0.0683831	0.443816
1066	36770	ZNF143	FLP143HA	Epithelium	Embryonic Kidney	0.0565155	0.0598762	0.105657	0.0684868	0.444072
1067	42352	STAG1	GM12892	Lymphoblastoid	Blood	0.188126	0.0422274	0.0667081	0.0686898	0.444633
1068	36834	ESR1	MCF-7	Epithelium	Breast	0.0481153	0.0721484	0.110231	0.0687538	0.444633
1069	71679	CTCF	MCF-7	None	Breast	0.135496	0.0523008	0.0580155	0.0688019	0.444633
1070	8791	KDM5B	K562	Erythroblast	Bone Marrow	0.0939946	0.0626689	0.0587562	0.0688307	0.444633
1071	40166	TCF7L1	Kasumi-1	Myeloblast	Blood	0.067369	0.0778969	0.0635089	0.0690896	0.445889
1072	53347	CDK9	HeLa	Epithelium	Cervix	0.074243	0.0767629	0.0595836	0.0693307	0.446213
1073	33171	MED1	H2171	Epithelium	Lung	0.106626	0.0787214	0.0470549	0.0693616	0.446213
1074	276	SMAD3	BG03	Embryonic Stem Cell	Embryo	0.0691358	0.13416	0.0465928	0.0693815	0.446213
1075	43081	CDK9	HEK293T	Epithelium	Embryonic Kidney	0.0779216	0.074588	0.0588665	0.0694163	0.446213
1076	65061	ZNF554	HEK293	Epithelium	Embryonic Kidney	0.0791538	0.0950372	0.0498479	0.0695012	0.446213
1077	51597	STAT3	HUES64	Embryonic Stem Cell	Embryo	0.0687216	0.0705401	0.0693439	0.0695272	0.446213
1078	67711	CREB1	LNCaP	Epithelium	Prostate	0.0943781	0.0684709	0.0559157	0.0696835	0.446802
1079	56901	PBX3	SMMC-7721	None	Liver	0.0893082	0.052882	0.0774722	0.0697989	0.447025
1080	1629	PHF8	Hs68	Fibroblast	Foreskin	0.0684931	0.0695878	0.0715281	0.0698476	0.447025
1081	73515	BRD4	SUM159PT	mammary carcinoma cell line	Breast	0.0659977	0.12165	0.0519027	0.0705145	0.450875
1082	64377	BACH1	K562	Erythroblast	Bone Marrow	0.0755719	0.0668283	0.0706587	0.0708434	0.452397
1083	67926	SPI1	None	Macrophage	Blood	0.108585	0.038778	0.132811	0.0709232	0.452397
1084	8777	HDAC2	K562	Erythroblast	Bone Marrow	0.0693058	0.0805828	0.0650255	0.0710711	0.452397
1085	32984	FAIRE	H9	Embryonic Stem Cell	Embryo	0.0829661	0.0759226	0.0588313	0.071078	0.452397
1086	53297	ERG	TSU-1621-MT	None	None	0.0759269	0.0606907	0.079651	0.0711029	0.452397
1087	42368	STAG1	GM18486	Lymphoblastoid	Blood	0.145604	0.0461499	0.0724465	0.0711452	0.452397
1088	64771	SRSF3	HepG2	Epithelium	Liver	0.0684083	0.0750653	0.0708776	0.0713476	0.452763
1089	67927	SPI1	None	Macrophage	Blood	0.0921333	0.0431053	0.12314	0.0713867	0.452763
1090	44312	E2F1	LNCaP	Epithelium	Prostate	0.15041	0.0660404	0.0490412	0.0714164	0.452763
1091	45845	CTCF	HRE	Epithelium	None	0.209323	0.0320517	0.1512	0.0714652	0.452763
1092	71213	FOXA1	LNCaP	Epithelium	Prostate	0.342557	0.0319529	0.114877	0.0715688	0.452763
1093	75836	RAD21	Rh4	rhabdomyosarcoma	None	0.1687	0.0341532	0.140232	0.0715957	0.452763
1094	39058	BRD4	MM1.S	B Lymphocyte	Blood	0.125009	0.0440892	0.0888953	0.0717941	0.453213
1095	45419	SAP30	K562	Erythroblast	Bone Marrow	0.0751149	0.080175	0.0624757	0.071798	0.453213
1096	42483	CTCF	GM19240	Lymphoblastoid	Blood	0.100421	0.100421	0.0458356	0.0720621	0.453449
1097	5573	GATA1	None	Erythroblast	Blood	0.0818956	0.0462805	0.126828	0.0721629	0.453449
1098	53417	RUNX1	Kasumi-1	Myeloblast	Blood	0.139016	0.0388319	0.113459	0.0722764	0.453449
1099	62880	SMARCE1	K562	Erythroblast	Bone Marrow	0.0676434	0.0512201	0.136584	0.0722935	0.453449
1100	58939	NRF1	HCC1954	Epithelium	Mammary Gland	0.127379	0.0814235	0.0466917	0.0724288	0.453449
1101	1228	CCDC101	HeLa	Epithelium	Cervix	0.0733344	0.0677122	0.0770065	0.072484	0.453449
1102	56355	MED1	MOLM-14	Myeloid Cell	None	0.0653139	0.0785074	0.0749605	0.0724912	0.453449
1103	64739	ZBTB33	K562	Erythroblast	Bone Marrow	0.0765444	0.0519438	0.111466	0.07279	0.453449
1104	56535	TEAD1	None	None	None	0.118535	0.037092	0.163107	0.0728391	0.453449
1105	4611	TAL1	None	Proerythroblast	Bone Marrow	0.0640266	0.0913796	0.068354	0.0728612	0.453449
1106	67584	MYC	None	Fibroblast	Foreskin	0.0673129	0.0738219	0.0783102	0.0728703	0.453449
1107	38196	CTCF	FB0167P	Fibroblast	None	0.115498	0.0698339	0.0550433	0.0730399	0.453449
1108	73965	ZNF263	293T	None	None	0.0777529	0.0805971	0.0634131	0.073117	0.453449
1109	33866	POU5F1	NCCIT	None	Embryo	0.0732519	0.0745375	0.0717211	0.0731523	0.453449
1110	6570	FOXA1	T47D	Epithelium	Mammary Gland	0.0844848	0.0482077	0.117345	0.0731727	0.453449
1111	70804	TCF7L1	HCT-116	Colon cancer cell	Colon	0.110562	0.117841	0.042303	0.0731757	0.453449
1112	45679	RELA	GM19193	Lymphoblastoid	Blood	0.0799508	0.0490134	0.12267	0.073252	0.453449
1113	1990	FOS	K562	Erythroblast	Bone Marrow	0.139055	0.0467894	0.0797935	0.0732767	0.453449
1114	62923	CUX1	K562	Erythroblast	Bone Marrow	0.0733835	0.0681875	0.0791648	0.0733108	0.453449
1115	5461	CDX2	LS180	Epithelium	Colon	0.0559736	0.0789371	0.0962178	0.0733678	0.453449
1116	70760	HDAC2	MM1.S	B Lymphocyte	Blood	0.086126	0.06764	0.0692141	0.0734677	0.453449
1117	46032	GATA2	SH-SY5Y	None	Bone Marrow	0.0778791	0.0623794	0.0839375	0.0735775	0.453449
1118	45386	SETDB1	K562	Erythroblast	Bone Marrow	0.0797189	0.0679269	0.0743217	0.0736781	0.453449
1119	8772	SETDB1	K562	Erythroblast	Bone Marrow	0.0797189	0.0679269	0.0743217	0.0736781	0.453449
1120	70763	HDAC1	MM1.S	B Lymphocyte	Blood	0.181711	0.0443881	0.0772446	0.0737186	0.453449
1121	72878	MYF5	Rh18	rhabdomyosarcoma	None	0.0780555	0.0923068	0.0586012	0.0737403	0.453449
1122	71138	BRD4	MCF-10A	Epithelium	None	0.0594019	0.0931585	0.0765843	0.0738894	0.453449
1123	34102	NANOG	HUES64	Embryonic Stem Cell	Embryo	0.0977064	0.0482071	0.103225	0.0739386	0.453449
1124	71936	MYC	U2OS	None	Bone	0.0697739	0.0729403	0.0803017	0.0740881	0.453449
1125	73514	BRD4	SUM159PT	mammary carcinoma cell line	Breast	0.0715375	0.0934798	0.0632774	0.0741475	0.453449
1126	55895	T	None	Fibroblast	None	0.0694262	0.0711492	0.0834805	0.0741974	0.453449
1127	46276	ATF3	K562	Erythroblast	Bone Marrow	0.081297	0.0633698	0.0810143	0.0742309	0.453449
1128	45568	CTCF	AG09319	Fibroblast	Gingiva	0.134115	0.0454569	0.0902353	0.0742969	0.453449
1129	42571	CTCF	MS1	Lymphoblastoid	Blood	0.122609	0.0559745	0.0693597	0.0743413	0.453449
1130	46116	PAX5	GM12878	B Lymphocyte	Blood	0.0765074	0.0873413	0.0633289	0.0744461	0.453449
1131	71063	ESR1	MCF-7	None	Breast	0.0727508	0.0744165	0.0763227	0.0744686	0.453449
1132	72500	ESR1	None	None	Breast	0.0752648	0.0716938	0.0768946	0.0745549	0.453449
1133	53306	LMO2	TSU-1621-MT	None	None	0.0672721	0.0674107	0.0947457	0.0745626	0.453449
1134	33888	CDK9	None	Plasma Cell	None	0.0797888	0.114222	0.0526161	0.0745964	0.453449
1135	42715	GLI2	LoVo	None	Colon	0.0898816	0.0647142	0.0733445	0.0746289	0.453449
1136	50174	HIRA	IMR90	Fibroblast	Lung	0.0749818	0.0704279	0.0794267	0.0747683	0.453449
1137	76928	CD74	None	B Lymphocyte	None	0.0752821	0.0720012	0.0773188	0.0748039	0.453449
1138	56379	CDK8	K562	Erythroblast	Bone Marrow	0.0714274	0.0688158	0.0863563	0.0748049	0.453449
1139	45969	IRF1	K562	Erythroblast	Bone Marrow	0.0705145	0.0811142	0.073558	0.0748093	0.453449
1140	64101	BCL3	A549	Epithelium	Lung	0.0740254	0.0813092	0.0700815	0.0748616	0.453449
1141	73725	NR3C1	HepG2	Epithelium	Liver	0.0665551	0.0941165	0.0693233	0.0748923	0.453449
1142	46360	SIN3A	SK-N-SH	Neuroblastoma cell	Brain	0.109739	0.0753603	0.05644	0.0749188	0.453449
1143	50692	MED1	hMADS-3	Adipocyte	Adipose	0.107876	0.050561	0.0908341	0.0750454	0.453744
1144	8792	KDM5B	K562	Erythroblast	Bone Marrow	0.068086	0.0796603	0.0786751	0.0750989	0.453744
1145	64946	BHLHE40	IMR90	Fibroblast	Lung	0.120461	0.0383595	0.171105	0.0752634	0.454341
1146	41788	EZH2	None	iPSC	None	0.0728103	0.181954	0.0480673	0.0754321	0.45441
1147	77255	DPF1	MCF-7	None	None	0.0722919	0.085472	0.0702279	0.0754408	0.45441
1148	39359	SMAD3	LX2	Hepatic Stellate Cell	None	0.102765	0.0568912	0.0802136	0.0755096	0.45441
1149	45666	CTCF	GM13976	Lymphoblastoid	Blood	0.110284	0.0668581	0.0636781	0.0756028	0.45441
1150	46023	CTCF	None	None	Pancreas	0.109589	0.0637528	0.0670418	0.0756035	0.45441
1151	46182	CREB1	H1	Embryonic Stem Cell	Embryo	0.0890709	0.145516	0.0461358	0.0757713	0.455023
1152	50039	FOXA1	LNCaP	Epithelium	Prostate	0.138489	0.0659577	0.0578572	0.0758578	0.455147
1153	45629	ZNF143	GM12878	B Lymphocyte	Blood	0.170261	0.0488919	0.0751037	0.0761123	0.456003
1154	65116	FEZF1	HEK293	Epithelium	Embryonic Kidney	0.0599156	0.0699669	0.117816	0.0761324	0.456003
1155	50256	FOXP1	VCaP	Epithelium	Prostate	0.0743634	0.0681386	0.0897109	0.076413	0.457287
1156	48313	SPI1	GM12878	B Lymphocyte	Blood	0.120465	0.0513233	0.0869471	0.0765531	0.457366
1157	33504	ESR1	MCF-7	Epithelium	Breast	0.0537148	0.0809233	0.120515	0.0765585	0.457366
1158	8807	CHD1	H1	Embryonic Stem Cell	Embryo	0.0766401	0.123251	0.0553215	0.0766249	0.457367
1159	53634	STAT5B	None	T Lymphocyte	Blood	0.103525	0.0571838	0.0832231	0.0766946	0.457389
1160	45890	HCFC1	K562	Erythroblast	Bone Marrow	0.0664197	0.102487	0.0703149	0.076911	0.457652
1161	37619	RUNX1	ME-1	Leukemia Cell	None	0.133934	0.11839	0.0429019	0.0769158	0.457652
1162	52498	TCF21	None	None	Coronary artery smooth muscle	0.0714279	0.0793843	0.0806593	0.0769375	0.457652
1163	77179	ZNF10	293T	None	None	0.0759957	0.079715	0.0757204	0.0771022	0.458124
1164	77114	ZNF460	293T	None	None	0.0815426	0.0759016	0.0745301	0.0772107	0.458124
1165	32939	ERG	RWPE1	Epithelium	Prostate	0.0654911	0.0940531	0.0773202	0.077284	0.458124
1166	38340	BRD4	None	T Lymphocyte	Blood	0.0622262	0.102241	0.0772578	0.0773942	0.458124
1167	56353	CDK8	MOLM-14	Myeloid Cell	None	0.0711177	0.0836159	0.0786625	0.0774598	0.458124
1168	72099	SMARCC1	HCT-116	colorectal carcinoma derived cell line	None	0.0752928	0.0765601	0.0809905	0.0775404	0.458124
1169	44686	LANA	iSLK-219	Epithelium	Kidney	0.0775825	0.0775825	0.0775825	0.0775825	0.458124
1170	62550	TFDP1	K562	Erythroblast	Bone Marrow	0.0776127	0.0917301	0.0673121	0.0776602	0.458124
1171	45222	HDAC2	H1	Embryonic Stem Cell	Embryo	0.103215	0.0579263	0.0853694	0.0776796	0.458124
1172	8810	HDAC2	H1	Embryonic Stem Cell	Embryo	0.103215	0.0579263	0.0853694	0.0776796	0.458124
1173	43095	CDK8	MM1.S	B Lymphocyte	Blood	0.0767927	0.0793079	0.0774503	0.0778361	0.458656
1174	42464	CTCF	GM19239	Lymphoblastoid	Blood	0.12197	0.0680729	0.0638006	0.0779329	0.458756
1175	64801	BCL3	A549	Epithelium	Lung	0.0821507	0.0779678	0.0742321	0.0779859	0.458756
1176	2654	PAX3	Rh4	None	Muscle	0.0783513	0.0730282	0.0838121	0.0781548	0.459218
1177	54028	ESR1	MCF-7	Epithelium	Breast	0.0770994	0.0796377	0.0779752	0.0782236	0.459218
1178	65176	ZNF22	HEK293	Epithelium	Embryonic Kidney	0.0797263	0.0748112	0.080497	0.0782638	0.459218
1179	42484	CTCF	GM19240	Lymphoblastoid	Blood	0.0816335	0.163806	0.0496857	0.0783787	0.459294
1180	73449	RUNX1	MV4-11	AML cell line	None	0.100685	0.0921657	0.0570807	0.078428	0.459294
1181	42696	MYF6	LoVo	None	Colon	0.0792765	0.0785202	0.0787088	0.0788339	0.459294
1182	36712	CDX2	COLO-320	Epithelium	Colon	0.0816422	0.0677472	0.0904996	0.0788481	0.459294
1183	53302	T	TSU-1621-MT	None	None	0.086187	0.299406	0.0420755	0.078907	0.459294
1184	69871	BRD4	None	Th1	None	0.086774	0.0920254	0.0642341	0.0790738	0.459294
1185	5884	SPI1	THP-1	Monocyte	Blood	0.0853914	0.0594832	0.105766	0.0790891	0.459294
1186	1303	NR3C1	HeLa	Epithelium	Cervix	0.0791227	0.0777388	0.0804817	0.0790989	0.459294
1187	64734	IKZF1	GM12878	B Lymphocyte	Blood	0.0694768	0.0755353	0.0972699	0.0791628	0.459294
1188	39780	RUNX1	Kasumi-1	Myeloblast	Blood	0.0903819	0.0590297	0.101035	0.0792405	0.459294
1189	47551	MYC	P493-6	B cell lymphoma	None	0.0676577	0.0804898	0.0939822	0.0793016	0.459294
1190	63814	L3MBTL2	K562	Erythroblast	Bone Marrow	0.0940591	0.0939717	0.0603736	0.0793612	0.459294
1191	36777	ZNF143	FLP143HA	Epithelium	Embryonic Kidney	0.0845791	0.0644358	0.0955052	0.0793825	0.459294
1192	394	RBPJ	CUTLL1	T Lymphocyte	Blood	0.100802	0.0650289	0.0799678	0.079412	0.459294
1193	69872	AFF4	None	Th1	None	0.128241	0.055541	0.0829541	0.0794471	0.459294
1194	8446	CEBPA	U937	None	Pleura	0.0667163	0.0802807	0.096997	0.0794993	0.459294
1195	74359	OTX2	D-341	None	None	0.0589207	0.103476	0.0898289	0.0795287	0.459294
1196	4969	RELA	GM12878	B Lymphocyte	Blood	0.0737198	0.0809471	0.0848616	0.079576	0.459294
1197	36314	RELA	GM19099	Lymphoblastoid	Blood	0.133403	0.0402932	0.173895	0.0795904	0.459294
1198	38772	CLOCK	LoVo	None	Colon	0.0990352	0.0620854	0.0876789	0.0798337	0.459294
1199	55344	SUMO2	K562	Erythroblast	Bone Marrow	0.0894658	0.067504	0.0864857	0.0799117	0.459294
1200	63451	HDAC1	K562	Erythroblast	Bone Marrow	0.0690327	0.144299	0.0616979	0.0799913	0.459294
1201	46008	MYC	MCF-10A	Epithelium	Breast	0.0795405	0.166579	0.0523231	0.0800276	0.459294
1202	68715	BRD4	IMR90	fibrobasts	None	0.0978487	0.0608053	0.0923481	0.0800893	0.459294
1203	46377	REST	U87	None	Brain	0.0997658	0.129172	0.0504821	0.0801244	0.459294
1204	45925	IRF1	K562	Erythroblast	Bone Marrow	0.0692597	0.134499	0.0638713	0.0801345	0.459294
1205	67317	SOX2	None	Neuronal Progenitor cell	None	0.118503	0.054025	0.0946504	0.0801637	0.459294
1206	46266	ELF1	K562	Erythroblast	Bone Marrow	0.112168	0.0702238	0.0699733	0.0801997	0.459294
1207	50569	MYB	Jurkat	T Lymphocyte	Blood	0.115172	0.0621504	0.0788341	0.0802036	0.459294
1208	69558	PSIP1	MV4-11	Leukemia Cell	None	0.0887665	0.0708758	0.0832955	0.0802719	0.459304
1209	48305	REST	GM12878	B Lymphocyte	Blood	0.113875	0.0565528	0.0918099	0.0804598	0.459686
1210	72629	BRD4	None	Endothelial Cell	Umbilical Vein	0.0752063	0.0862146	0.0809582	0.0805471	0.459686
1211	49099	PPARG	NCI-H1993	None	Lung	0.0812342	0.079305	0.0815782	0.0806936	0.459686
1212	36349	PTPN11	A549	Epithelium	Lung	0.0724871	0.091914	0.0799793	0.0807083	0.459686
1213	64800	BCL3	A549	Epithelium	Lung	0.0929105	0.0831857	0.0694747	0.0807178	0.459686
1214	67699	CTCF	SK-N-SH	Neuroblastoma cell	Brain	0.186102	0.0421616	0.119619	0.0808834	0.459686
1215	48827	MBD2	MCF-7	Epithelium	Breast	0.10278	0.0750089	0.0713872	0.0809756	0.459686
1216	64060	CSDE1	K562	Erythroblast	Bone Marrow	0.0801599	0.0806345	0.0821595	0.0809759	0.459686
1217	46043	CTCF	SK-N-SH_RA	Neuron	Brain	0.100089	0.0855618	0.0653386	0.0811727	0.459686
1218	5460	CDX2	LS180	Epithelium	Colon	0.122595	0.05924	0.0835823	0.0812392	0.459686
1219	70857	E2F1	U2OS	osteosarcoma	None	0.0829064	0.0824014	0.0786706	0.0812825	0.459686
1220	48276	ZBTB33	GM12878	B Lymphocyte	Blood	0.0807767	0.0817445	0.0813512	0.0812889	0.459686
1221	48298	REST	GM12878	B Lymphocyte	Blood	0.0905009	0.0681443	0.0895519	0.0813514	0.459686
1222	46004	FOS	MCF-10A	Epithelium	Breast	0.104872	0.0914363	0.0608217	0.0813682	0.459686
1223	33195	MYC	P493-6	B cell lymphoma	None	0.18247	0.045884	0.101397	0.0814266	0.459686
1224	54089	ESR1	MCF-7	Epithelium	Breast	0.0855237	0.0726654	0.087815	0.0814415	0.459686
1225	45385	REST	K562	Erythroblast	Bone Marrow	0.0761239	0.0996559	0.0733252	0.0815358	0.459686
1226	8796	REST	K562	Erythroblast	Bone Marrow	0.0761239	0.0996559	0.0733252	0.0815358	0.459686
1227	72345	BRD4	Gen2.2	Plasmacytoid dendritic cell	None	0.0812733	0.0806834	0.0831067	0.0816752	0.460097
1228	50408	PPARG	hMADS-3	Adipocyte	Adipose	0.151507	0.0477221	0.107426	0.081843	0.460667
1229	63319	NR2F2	None	None	Liver	0.065814	0.126391	0.0737666	0.0819798	0.461062
1230	69816	NELFE	MCF-7	Human Breast Cancer Cell	Breast	0.0926639	0.0786824	0.0767454	0.0821347	0.461557
1231	5497	ESR1	MCF-7	Epithelium	Breast	0.0805493	0.0822697	0.0839003	0.0822175	0.461647
1232	9216	POLR2B	HeLa	Epithelium	Cervix	0.111373	0.0616236	0.0893372	0.082531	0.463031
1233	64778	REST	HEK293	Epithelium	Embryonic Kidney	0.0642004	0.115111	0.0829871	0.082723	0.463355
1234	9211	THAP1	HeLa	Epithelium	Cervix	0.080987	0.0846627	0.0826977	0.0827559	0.463355
1235	62756	MTA2	K562	Erythroblast	Bone Marrow	0.0739165	0.0801328	0.09792	0.0828525	0.463355
1236	50379	EZH2	None	Proerythroblast	Fetal Liver	0.0819617	0.0845573	0.0825348	0.0830034	0.463355
1237	35945	FOXA1	Huh7	Epithelium	Liver	0.118677	0.0585521	0.0933955	0.0830127	0.463355
1238	58506	WDR5	BE2-C	Neuroblast	Brain	0.11844	0.0989381	0.0566272	0.0830438	0.463355
1239	55299	JUN	MDA-MB-231	Epithelium	Breast	0.0867546	0.0676425	0.101768	0.0830723	0.463355
1240	37934	ETS1	None	Endothelial Cell	Umbilical Vein	0.0811003	0.0865179	0.0821177	0.0831815	0.463355
1241	39572	BCL6	OCI-Ly7	B cell lymphoma	Blood	0.095221	0.0767567	0.0797552	0.0831921	0.463355
1242	74663	ZNF18	K562	Erythroblast	Bone Marrow	0.081305	0.0699038	0.105926	0.0832857	0.463438
1243	68052	RELB	L1236	Hodgkin Lymphoma Cell	None	0.0740105	0.105151	0.0769493	0.083341	0.463438
1244	50877	SPI1	None	None	None	0.097488	0.0790419	0.0774567	0.0837741	0.465228
1245	2774	VDR	THP-1	Monocyte	Blood	0.0833441	0.0804469	0.0881407	0.0838613	0.465228
1246	68714	BRD4	IMR90	fibrobasts	None	0.0826417	0.0825281	0.0865704	0.0838729	0.465228
1247	58877	RUNX1	TF-1	Erythroblast	Bone Marrow	0.0910147	0.0650656	0.106133	0.0839321	0.465228
1248	74052	NKX2-1	A549	Epithelium	Lung	0.109376	0.106567	0.0579924	0.0840421	0.465464
1249	76818	NEUROG2	None	Fibroblast	Fetal Lung	0.0785628	0.114814	0.0703208	0.084219	0.465896
1250	48302	REST	GM12878	B Lymphocyte	Blood	0.100439	0.0687677	0.0898507	0.0842549	0.465896
1251	2447	PML	MR4	Promyelocytic cell	Bone Marrow	0.0680355	0.0943349	0.0981627	0.084595	0.467403
1252	70803	TCF7L1	HCT-116	Colon cancer cell	Colon	0.0962625	0.0800023	0.0798898	0.084749	0.46775
1253	41793	JARID2	None	iPSC	None	0.122489	0.123836	0.0518714	0.0848195	0.46775
1254	74357	NEUROD1	D-341	None	None	0.0754427	0.193021	0.0582516	0.0848609	0.46775
1255	70813	SP1	HCT-116	Colon cancer cell	Colon	0.116513	0.0950992	0.0614725	0.0849763	0.467998
1256	33147	ESR1	ZR-75-1	Epithelium	Mammary Gland	0.0853286	0.0805637	0.0901012	0.0851576	0.467998
1257	4964	RELA	GM18951	Lymphoblastoid	Blood	0.0836904	0.084268	0.0877374	0.0851959	0.467998
1258	76995	GLI2	THP-1	None	None	0.0775327	0.10854	0.0762132	0.0852045	0.467998
1259	64061	CSDE1	K562	Erythroblast	Bone Marrow	0.0851307	0.0842399	0.0863894	0.0852444	0.467998
1260	52432	WDR5	HEK293	Epithelium	Embryonic Kidney	0.103009	0.115882	0.0591991	0.085337	0.468135
1261	65076	ZNF382	HEK293	Epithelium	Embryonic Kidney	0.0785226	0.0977437	0.0827865	0.0856216	0.468928
1262	45620	SREBF1	GM12878	B Lymphocyte	Blood	0.0945863	0.0772375	0.0868752	0.0856548	0.468928
1263	55739	SPI1	K562	Erythroblast	Bone Marrow	0.180568	0.0413837	0.17404	0.0857855	0.468928
1264	3056	CTCF	None	Stromal Cell	Adipose	0.124521	0.0622394	0.0918904	0.0859366	0.468928
1265	46305	TRIM28	K562	Erythroblast	Bone Marrow	0.0769062	0.0903528	0.0924817	0.0860146	0.468928
1266	4968	RELA	GM18526	Lymphoblastoid	Blood	0.0896175	0.0736459	0.0985082	0.0860193	0.468928
1267	46367	CTCF	SK-N-SH_RA	Neuron	Brain	0.214528	0.0460379	0.113854	0.0862959	0.468928
1268	42298	CTCF	GM12890	Lymphoblastoid	Blood	0.174515	0.062199	0.0761058	0.0863042	0.468928
1269	68572	POU3F2	None	Neural Progenitor Cell	None	0.0875971	0.0859128	0.085436	0.0863056	0.468928
1270	37349	CREB1	A549	Epithelium	Lung	0.142768	0.126075	0.049973	0.0863473	0.468928
1271	53629	STAT5B	None	T Lymphocyte	Blood	0.126148	0.0845711	0.066471	0.0863706	0.468928
1272	65208	ZNF680	HEK293	Epithelium	Embryonic Kidney	0.0984112	0.0749025	0.089506	0.0865213	0.468928
1273	42710	CREB1	LoVo	None	Colon	0.114977	0.0608891	0.104025	0.0865426	0.468928
1274	75276	ZBTB48	U2OS	None	None	0.0757214	0.220188	0.0579919	0.0865544	0.468928
1275	34396	MECP2	IMR90	Fibroblast	Lung	0.123518	0.0994886	0.0602883	0.0865696	0.468928
1276	1880	RBL2	IMR90	Fibroblast	Lung	0.0853007	0.0850641	0.089563	0.0865953	0.468928
1277	45919	ZMIZ1	K562	Erythroblast	Bone Marrow	0.0937809	0.068931	0.105463	0.0866439	0.468928
1278	46123	MEF2A	GM12878	B Lymphocyte	Blood	0.103368	0.0602162	0.119301	0.0867395	0.468928
1279	63744	FOXK2	K562	Erythroblast	Bone Marrow	0.0913564	0.0933687	0.0775246	0.0868318	0.468928
1280	5039	CTCF	GM12878	B Lymphocyte	Blood	0.163509	0.054363	0.0977958	0.0868386	0.468928
1281	73405	NOTCH1	None	Neurosphere	None	0.0825266	0.0909019	0.0880648	0.087027	0.4692
1282	74666	NRF1	K562	Erythroblast	Bone Marrow	0.102815	0.0768568	0.085157	0.0870378	0.4692
1283	47602	GATA4	KATO III	None	Stomach	0.0944444	0.0833669	0.0844626	0.087158	0.4692
1284	64111	SMARCA4	K562	Erythroblast	Bone Marrow	0.091876	0.0587994	0.150808	0.0872448	0.4692
1285	46095	CREB1	ECC-1	Epithelium	Endometrium	0.0981521	0.0750895	0.0920808	0.0873251	0.4692
1286	65100	ZNF669	HEK293	Epithelium	Embryonic Kidney	0.0887691	0.0868363	0.0868363	0.0874714	0.4692
1287	76282	EHF	None	Epithelium	None	0.0990534	0.0743492	0.0931018	0.0875317	0.4692
1288	62702	PRDM1	HEK293	Epithelium	Embryonic Kidney	0.0915409	0.0648493	0.12547	0.0875926	0.4692
1289	37927	ETS1	None	Endothelial Cell	Umbilical Vein	0.0847744	0.0771781	0.105193	0.0876048	0.4692
1290	50059	AR	None	Epithelium	Prostate	0.101698	0.0701443	0.0982993	0.0876226	0.4692
1291	70927	SUPT5H	BJAB	B Lymphocyte	None	0.118147	0.0676349	0.090667	0.0876356	0.4692
1292	57808	BRD4	LX2	Hepatic Stellate Cell	None	0.134415	0.0619985	0.0935666	0.0878066	0.469752
1293	64669	CEBPB	A549	Epithelium	Lung	0.0811587	0.092319	0.0913926	0.0879963	0.470402
1294	67771	TAL1	F5	Erythroid Progenitor Cell	Fetal Liver	0.0751405	0.0682982	0.16057	0.0881285	0.470413
1295	63318	NR2F2	None	None	Liver	0.0671524	0.100482	0.109591	0.088423	0.470413
1296	45815	MAFK	HepG2	Epithelium	Liver	0.0618183	0.140417	0.0932637	0.0884503	0.470413
1297	68824	SPI1	K562	Leukemia Cell	None	0.0684389	0.105956	0.101027	0.0884597	0.470413
1298	64400	CEBPB	A549	Epithelium	Lung	0.08492	0.0768513	0.109572	0.0885098	0.470413
1299	56543	TEAD4	HuCCT1	None	None	0.0963864	0.0731595	0.101376	0.0885224	0.470413
1300	73511	BRD4	SUM159PT	mammary carcinoma cell line	Breast	0.0885795	0.0892144	0.0877885	0.0885237	0.470413
1301	33437	SMARCA4	None	None	Blood	0.12535	0.0814013	0.0732807	0.0886001	0.470413
1302	48267	REST	GM12878	B Lymphocyte	Blood	0.0854765	0.0879327	0.0930366	0.088708	0.470413
1303	6567	FOXA1	MCF-7	Epithelium	Breast	0.0944011	0.176704	0.0562693	0.0887242	0.470413
1304	42850	GRHL1	LoVo	None	Colon	0.0866044	0.0882502	0.0915223	0.0887469	0.470413
1305	75849	BRD4	Rh4	rhabdomyosarcoma	None	0.0948872	0.0814257	0.0912277	0.0888156	0.470417
1306	68226	RELA	BEAS-2B	Epithelium	Lung	0.0964909	0.0825163	0.0887279	0.0888908	0.470454
1307	42215	STAT3	OCI-Ly7	B cell lymphoma	Blood	0.137528	0.06254	0.0950969	0.0890707	0.471046
1308	42506	CTCF	GM2255	Lymphoblastoid	Blood	0.226494	0.045934	0.126195	0.0891484	0.471096
1309	69875	RELA	None	Th1	None	0.11215	0.0979458	0.0688032	0.089226	0.471146
1310	45975	CTCF	LNCaP	Epithelium	Prostate	0.272232	0.0382177	0.215076	0.0893475	0.471427
1311	52222	LMNA	HeLa	Epithelium	Cervix	0.0892491	0.0890258	0.0899964	0.0894219	0.47146
1312	71321	RAD21	HCT-116	Colon cancer cell	Colon	0.0976297	0.154546	0.0593561	0.0897772	0.472031
1313	9321	HOXA9	SEM	Pre-B Lymphocyte	None	0.0872758	0.0869036	0.0957105	0.0897899	0.472031
1314	76673	ZMYND8	DU145	Epithelium	Prostate	0.0820423	0.0868022	0.103327	0.0898778	0.472031
1315	70816	SP1	HCT-116	Colon cancer cell	Colon	0.0999626	0.144927	0.0602887	0.089903	0.472031
1316	56247	BIRA	CClp1	None	None	0.0885889	0.092489	0.0891104	0.0900309	0.472031
1317	73712	AFF1	SEM	B Lymphocyte	None	0.113602	0.142846	0.0566128	0.0900347	0.472031
1318	2110	PRAME	K562	Erythroblast	Bone Marrow	0.123661	0.0639166	0.103708	0.0900825	0.472031
1319	46011	MYC	NB4	Promyelocytic cell	Blood	0.0855612	0.117591	0.0761391	0.0901042	0.472031
1320	72094	RUNX1	NB4	Leukemic cells	None	0.127688	0.0569706	0.124574	0.0901448	0.472031
1321	71807	FOXA1	None	None	Breast	0.0604257	0.163479	0.0938555	0.090467	0.47336
1322	62734	TAL1	K562	Erythroblast	Bone Marrow	0.114501	0.0622922	0.119639	0.090736	0.474408
1323	63314	HDAC2	HepG2	Epithelium	Liver	0.0905682	0.0901562	0.0917735	0.0908277	0.474528
1324	46218	CTCF	HCT-116	None	Colon	0.162982	0.0660356	0.0846024	0.0910223	0.474713
1325	76405	RELA	GM12878	Lymphoblastoid	None	0.0882908	0.0776473	0.114071	0.0910524	0.474713
1326	63311	SP1	HepG2	Epithelium	Liver	0.0920759	0.0897138	0.0915879	0.0911147	0.474713
1327	54048	ESR1	T47D	Epithelium	Mammary Gland	0.0904346	0.0917471	0.0912408	0.0911377	0.474713
1328	41138	ESR1	None	Epithelium	Mammary Gland	0.0910464	0.0913643	0.0917745	0.0913941	0.475249
1329	69819	NELFE	MCF-7	Human Breast Cancer Cell	Breast	0.0943059	0.0887447	0.0913095	0.0913986	0.475249
1330	45684	TBP	H1	Embryonic Stem Cell	Embryo	0.10664	0.280391	0.0489628	0.0915004	0.475249
1331	64399	CEBPB	A549	Epithelium	Lung	0.0827918	0.0893709	0.105246	0.0915745	0.475249
1332	8800	SAP30	K562	Erythroblast	Bone Marrow	0.0912097	0.125061	0.0722345	0.0915844	0.475249
1333	52617	RELA	MCF-7	Epithelium	Breast	0.0927777	0.0854818	0.0978254	0.0917534	0.475769
1334	64376	TBX21	GM12878	B Lymphocyte	Blood	0.0848459	0.107401	0.0864408	0.0918693	0.476012
1335	53493	SOX9	HT29	Epithelium	Colon	0.160504	0.062604	0.0952276	0.0921361	0.476833
1336	65119	PATZ1	HEK293	Epithelium	Embryonic Kidney	0.0938605	0.100332	0.0840374	0.0922634	0.476833
1337	47849	REST	GM12878	B Lymphocyte	Blood	0.0957389	0.0860272	0.0960891	0.0923819	0.476833
1338	33137	FOXA1	MCF-7	Epithelium	Breast	0.0773289	0.132309	0.0831324	0.0924058	0.476833
1339	42481	STAG1	GM19239	Lymphoblastoid	Blood	0.147761	0.0647421	0.0966684	0.0924526	0.476833
1340	45951	E2F4	K562	Erythroblast	Bone Marrow	0.110383	0.105832	0.0716806	0.0925242	0.476833
1341	1870	RB1	IMR90	Fibroblast	Lung	0.0968042	0.0887062	0.092742	0.0926363	0.476833
1342	62713	ZNF175	HEK293	Epithelium	Embryonic Kidney	0.0894241	0.0934049	0.0955228	0.0927163	0.476833
1343	54086	ESR1	MCF-7	Epithelium	Breast	0.0879639	0.104876	0.0873268	0.0927416	0.476833
1344	50176	HIRA	IMR90	Fibroblast	Lung	0.0913827	0.0932919	0.0936242	0.092756	0.476833
1345	65186	EGR3	HEK293	Epithelium	Embryonic Kidney	0.257986	0.113108	0.0497263	0.0928184	0.476833
1346	62732	ZNF366	HEK293	Epithelium	Embryonic Kidney	0.0744403	0.126213	0.0909411	0.0928555	0.476833
1347	46014	CTCF	NHDF-neo	Fibroblast	Skin	0.149825	0.0615526	0.106752	0.093292	0.478413
1348	38185	CTCF	H54	Glial Cell	Brain	0.141623	0.0742973	0.0854187	0.0933017	0.478413
1349	49980	BRD4	90-8TL	Schwann Cell	Brain	0.247986	0.0460602	0.145305	0.0935554	0.479335
1350	74667	MED1	K562	Erythroblast	Bone Marrow	0.0931988	0.083159	0.107529	0.0936202	0.479335
1351	45940	SMARCB1	K562	Erythroblast	Bone Marrow	0.107699	0.0735995	0.109867	0.0939201	0.479647
1352	48576	KDM6B	CUTLL1	T Lymphocyte	Blood	0.111924	0.139102	0.0629206	0.0940212	0.479647
1353	67746	GATA2	LNCaP	Epithelium	Prostate	0.0736601	0.111886	0.106207	0.0940544	0.479647
1354	46012	MAX	NB4	Promyelocytic cell	Blood	0.0996724	0.116747	0.0751014	0.0940964	0.479647
1355	35837	MYC	H1	Embryonic Stem Cell	Embryo	0.09607	0.089678	0.0968719	0.0940973	0.479647
1356	8096	MYC	H1	Embryonic Stem Cell	Embryo	0.09607	0.089678	0.0968719	0.0940973	0.479647
1357	5924	ETV4	PC-3	Epithelium	Prostate	0.0933959	0.0928019	0.0973396	0.0944714	0.481061
1358	57960	JMJD1C	Kasumi-1	Myeloblast	Blood	0.0940451	0.0910116	0.0990197	0.0945815	0.481061
1359	49626	GATA3	MCF-7	Epithelium	Breast	0.0776118	0.118338	0.0961474	0.0946148	0.481061
1360	52147	PDX1	CyT49	Embryonic Stem Cell	Embryo	0.0947887	0.076207	0.124059	0.0946531	0.481061
1361	68379	DUX4	LHCN-M2	Myoblast	Skeletal Muscle	0.0970235	0.0802793	0.112237	0.0947713	0.481145
1362	33191	MAX	MM1.S	B Lymphocyte	Blood	0.115231	0.0755217	0.102529	0.0948089	0.481145
1363	77108	ZNF485	293T	None	None	0.107365	0.0719566	0.119393	0.0951132	0.482335
1364	45881	TBP	K562	Erythroblast	Bone Marrow	0.173004	0.0645661	0.0962319	0.0952581	0.482716
1365	76204	AR	None	None	None	0.0969323	0.0925785	0.0968033	0.0953958	0.482717
1366	69803	NR1H2	HT29	colorectal adenocarcinoma	None	0.126414	0.0704091	0.106469	0.095398	0.482717
1367	57806	BRD3	LX2	Hepatic Stellate Cell	None	0.0979442	0.0841656	0.107066	0.0954748	0.482752
1368	8785	NCOR1	K562	Erythroblast	Bone Marrow	0.099844	0.0897479	0.0981196	0.0957013	0.48279
1369	64559	SP2	HEK293	Epithelium	Embryonic Kidney	0.133714	0.147727	0.0579011	0.0957243	0.48279
1370	43572	RNF2	None	Fibroblast	Foreskin	0.107446	0.0847034	0.097739	0.0957391	0.48279
1371	46359	REST	SK-N-SH	Neuroblastoma cell	Brain	0.125862	0.116087	0.0673696	0.0957618	0.48279
1372	45863	RFX5	IMR90	Fibroblast	Lung	0.117605	0.0745531	0.106599	0.0959686	0.483239
1373	5443	FLI1	None	Endothelial Cell	Umbilical Vein	0.0845615	0.0784194	0.148478	0.0960546	0.483239
1374	41188	EED	DU145	Epithelium	Prostate	0.121663	0.0727663	0.107357	0.0960606	0.483239
1375	45638	CHD2	GM12878	B Lymphocyte	Blood	0.0883922	0.0909898	0.112313	0.0961656	0.483416
1376	46361	GATA3	SK-N-SH	Neuroblastoma cell	Brain	0.182232	0.0607793	0.106101	0.0962882	0.483558
1377	64375	TBX21	GM12878	B Lymphocyte	Blood	0.0847836	0.105828	0.101009	0.0963532	0.483558
1378	64760	POLR2AphosphoS5	None	Neuron	None	0.14503	0.0812699	0.0835073	0.0964501	0.483558
1379	67457	E2F1	None	Mesenchymal Stem Cell	Umbilical Cord	0.113867	0.0811583	0.0999325	0.0964884	0.483558
1380	76401	NFKB1	GM12878	Lymphoblastoid	None	0.103411	0.0876439	0.100171	0.0965935	0.483558
1381	67516	GATA3	MDA-MB-231	Epithelium	Mammary Gland	0.10853	0.0835349	0.101233	0.0966137	0.483558
1382	45760	CTCF	HeLa-S3	Epithelium	Cervix	0.139059	0.0869322	0.0812807	0.0969589	0.484584
1383	8087	CTCF	HeLa	Epithelium	Cervix	0.139059	0.0869322	0.0812807	0.0969589	0.484584
1384	46211	SRF	HCT-116	None	Colon	0.149318	0.0831637	0.0821504	0.0973509	0.486029
1385	56558	SMC1A	HuCCT1	None	None	0.164504	0.0951554	0.0697093	0.0973886	0.486029
1386	63089	PRPF4	HepG2	Epithelium	Liver	0.0953872	0.0935666	0.105387	0.0978558	0.48742
1387	38824	MNT	LoVo	None	Colon	0.105552	0.0985527	0.0906151	0.0978705	0.48742
1388	5983	SUPT20H	GM12878	B Lymphocyte	Blood	0.0963111	0.0999559	0.0974378	0.0978788	0.48742
1389	64759	TCF7L2	K562	Erythroblast	Bone Marrow	0.0978258	0.102334	0.0942796	0.0980398	0.48787
1390	67427	RARA	SK-N-SH	Neuroblastoma cell	Brain	0.0976867	0.101155	0.0957041	0.0981322	0.487978
1391	39975	CTCF	GM12866	B Lymphocyte	Blood	0.149764	0.0842735	0.0827954	0.0982172	0.48805
1392	55126	PPARG	None	None	Adipose	0.100648	0.0954411	0.0992668	0.0984037	0.488625
1393	46038	MXI1	SK-N-SH	Neuroblastoma cell	Brain	0.125903	0.0925327	0.0853399	0.0985558	0.489029
1394	69807	NELFE	MCF-7	Human Breast Cancer Cell	Breast	0.0995401	0.101059	0.0958912	0.0987837	0.489809
1395	56359	BRD4	MOLM-14	Myeloid Cell	None	0.102825	0.0892625	0.10639	0.0989387	0.490051
1396	62757	MTA2	K562	Erythroblast	Bone Marrow	0.0975191	0.0914617	0.109548	0.0989743	0.490051
1397	37936	ETS1	None	Endothelial Cell	Umbilical Vein	0.0891645	0.0917899	0.122438	0.0991516	0.490345
1398	71040	ZNF143	MCF-7	MCF 7 Cells	None	0.116208	0.122814	0.0738612	0.0992243	0.490345
1399	5395	SP1	HCT-116	None	Colon	0.105869	0.294163	0.0556828	0.0992466	0.490345
1400	2001	GATA1	K562	Erythroblast	Bone Marrow	0.113978	0.068467	0.146085	0.099594	0.491102
1401	45970	GATA1	K562	Erythroblast	Bone Marrow	0.113978	0.068467	0.146085	0.099594	0.491102
1402	45719	CTCF	None	Epithelium	Esophagus	0.214526	0.0497422	0.171542	0.0996129	0.491102
1403	35046	ESR1	MCF-7	Epithelium	Breast	0.0713854	0.191502	0.0908351	0.099836	0.491218
1404	45178	CTCF	None	B Lymphocyte	Blood	0.162861	0.0575973	0.14753	0.0998511	0.491218
1405	42369	CTCF	GM18505	Lymphoblastoid	Blood	0.185409	0.0649896	0.105802	0.0998829	0.491218
1406	77149	ZNF282	293T	None	None	0.108393	0.121381	0.0796632	0.100049	0.491218
1407	53192	MYC	MCF-10A	Epithelium	Breast	0.106264	0.100317	0.094356	0.100084	0.491218
1408	45635	KAT2B	GM12878	B Lymphocyte	Blood	0.0985568	0.102898	0.0994432	0.100266	0.491218
1409	71677	CTCF	MCF-7	None	Breast	0.29533	0.0502659	0.13709	0.10028	0.491218
1410	62814	NR4A1	K562	Erythroblast	Bone Marrow	0.0988037	0.0737487	0.158499	0.100381	0.491218
1411	52618	RELA	MCF-7	Epithelium	Breast	0.101233	0.0969762	0.103177	0.100397	0.491218
1412	44762	TP53	None	Keratinocyte	Foreskin	0.0952848	0.0983614	0.108476	0.100412	0.491218
1413	77063	ZNF681	293T	None	None	0.101548	0.0987138	0.101548	0.100586	0.491218
1414	64424	KLF16	K562	Erythroblast	Bone Marrow	0.119651	0.0758437	0.120453	0.100681	0.491218
1415	8775	HDAC1	K562	Erythroblast	Bone Marrow	0.0779557	0.166792	0.0904077	0.100773	0.491218
1416	49196	DDX5	NTERA-2	None	Testis	0.205287	0.0474508	0.225276	0.10078	0.491218
1417	45930	JUN	K562	Erythroblast	Bone Marrow	0.100608	0.0950145	0.107587	0.100818	0.491218
1418	58333	MED1	LNCaP-abl	Epithelium	Prostate	0.108169	0.0928581	0.102976	0.100939	0.491218
1419	2121	RUNX1	K562	Erythroblast	Bone Marrow	0.100349	0.111344	0.092773	0.100943	0.491218
1420	45952	JUN	K562	Erythroblast	Bone Marrow	0.128724	0.0720476	0.122896	0.100962	0.491218
1421	62862	ZNF584	K562	Erythroblast	Bone Marrow	0.104219	0.0960485	0.103076	0.100987	0.491218
1422	57173	BRD4	MOLM-14	Myeloid Cell	None	0.142958	0.0609649	0.155459	0.101219	0.491858
1423	36764	ZNF76	FLP76	Epithelium	Embryonic Kidney	0.102153	0.082864	0.128327	0.101292	0.491858
1424	36111	ESR1	None	Epithelium	Mammary Gland	0.102205	0.098474	0.103605	0.101383	0.491858
1425	73524	BRD4	SUM159PT	mammary carcinoma cell line	Breast	0.157221	0.0691227	0.112676	0.101412	0.491858
1426	42538	CTCF	GM2610	Lymphoblastoid	Blood	0.16763	0.0677477	0.111496	0.101527	0.491858
1427	44026	AGO1	PC-3	Epithelium	Prostate	0.131003	0.0857962	0.0975095	0.101653	0.491858
1428	44874	5HMC	None	Erythroid Cell	None	0.366308	0.0397945	0.314314	0.101745	0.491858
1429	67719	FOXA1	LNCaP	Epithelium	Prostate	0.0884996	0.133718	0.0932206	0.101797	0.491858
1430	64321	ZNF362	HEK293	Epithelium	Embryonic Kidney	0.10565	0.0725031	0.15836	0.101816	0.491858
1431	73510	BRD4	SUM159PT	mammary carcinoma cell line	Breast	0.206191	0.0531136	0.161658	0.10183	0.491858
1432	73548	BRD4	SUM159PT	mammary carcinoma cell line	Breast	0.10266	0.103429	0.100214	0.102083	0.492736
1433	50135	TCF7	DLD-1	Epithelium	Colon	0.101805	0.099715	0.105907	0.102414	0.493613
1434	46210	TEAD4	HCT-116	None	Colon	0.236795	0.0523671	0.155317	0.102478	0.493613
1435	70860	E2F1	hTERT-RPE1	Epithelium	None	0.108172	0.0982952	0.101442	0.102479	0.493613
1436	62840	SP3	HEK293	Epithelium	Embryonic Kidney	0.157783	0.116964	0.0696328	0.103	0.495466
1437	73505	BRD4	SUM159PT	mammary carcinoma cell line	Breast	0.159989	0.0600358	0.155402	0.103046	0.495466
1438	34017	SMAD3	BG03	Embryonic Stem Cell	Embryo	0.10305	0.115528	0.0930044	0.103079	0.495466
1439	43051	BRD3	MM1.S	B Lymphocyte	Blood	0.143871	0.0794834	0.104343	0.103257	0.495469
1440	47599	GATA6	AGS	Epithelium	Stomach	0.0951992	0.106832	0.1088	0.103262	0.495469
1441	35845	CTCF	GM19239	Lymphoblastoid	Blood	0.169669	0.155254	0.0589759	0.103322	0.495469
1442	72929	TBX5	None	Cardiomyocyte	None	0.103047	0.103438	0.103832	0.103438	0.495469
1443	72954	TBX5	None	Cardiomyocyte	None	0.103047	0.103438	0.103832	0.103438	0.495469
1444	76809	NEUROG2	None	Fibroblast	Fetal Lung	0.0987452	0.0964556	0.117782	0.103532	0.495576
1445	37623	MYH11	ME-1	Leukemia Cell	None	0.0907766	0.178812	0.0801726	0.103643	0.495763
1446	4609	TAL1	None	Haematopoietic Progenitor Cell	Blood	0.105072	0.108903	0.098096	0.103835	0.496228
1447	45849	MAX	None	Endothelial Cell	Umbilical Vein	0.0839469	0.160425	0.092419	0.103883	0.496228
1448	43399	XBP1	MDA-MB-231	Epithelium	Breast	0.105013	0.102421	0.104712	0.104036	0.496615
1449	55321	FOXA2	Caco-2	Epithelium	Colon	0.231281	0.0557753	0.144604	0.104347	0.497201
1450	45945	NFYA	K562	Erythroblast	Bone Marrow	0.100227	0.105744	0.107344	0.104351	0.497201
1451	64671	CEBPB	A549	Epithelium	Lung	0.102846	0.0882307	0.129674	0.104375	0.497201
1452	45389	WHSC1	K562	Erythroblast	Bone Marrow	0.105286	0.105362	0.103386	0.10467	0.497602
1453	8786	WHSC1	K562	Erythroblast	Bone Marrow	0.105286	0.105362	0.103386	0.10467	0.497602
1454	55770	CTCF	K562	Erythroblast	Bone Marrow	0.0994336	0.102587	0.112887	0.104675	0.497602
1455	42569	CTCF	MS1	Lymphoblastoid	Blood	0.123068	0.117564	0.0831146	0.104782	0.497768
1456	46170	YY1	H1	Embryonic Stem Cell	Embryo	0.122848	0.120618	0.0819492	0.104907	0.49802
1457	37580	FAIRE	None	Epithelium	Mammary Gland	0.0809717	0.110982	0.137675	0.104993	0.498084
1458	56555	MED1	HuCCT1	None	None	0.115574	0.0894318	0.115197	0.105264	0.498927
1459	48443	KDM6B	BJ	Fibroblast	Skin	0.174305	0.0552943	0.197906	0.105315	0.498927
1460	48280	CEBPA	GM12878	B Lymphocyte	Blood	0.132853	0.0728155	0.138048	0.105591	0.499291
1461	67455	E2F1	None	Mesenchymal Stem Cell	Umbilical Cord	0.109603	0.101004	0.106792	0.105681	0.499291
1462	71042	ZNF143	MCF-7	MCF 7 Cells	None	0.119598	0.161919	0.0716011	0.105712	0.499291
1463	68820	GATA2	None	Erythroid progenitor	Bone Marrow	0.103164	0.0952711	0.122029	0.105734	0.499291
1464	74683	ZBTB2	GM12878	B Lymphocyte	Blood	0.163602	0.0741468	0.112728	0.1058	0.499291
1465	50990	CTCF	H1	Embryonic Stem Cell	Embryo	0.145709	0.110559	0.0800096	0.105851	0.499291
1466	45610	JUND	GM12878	B Lymphocyte	Blood	0.133667	0.0960566	0.0955669	0.105897	0.499291
1467	35878	BRD2	HEK293	Epithelium	Embryonic Kidney	0.120331	0.138595	0.0785021	0.106378	0.500638
1468	63310	ZNF318	K562	Erythroblast	Bone Marrow	0.105832	0.106137	0.107363	0.10644	0.500638
1469	46352	MEF2A	SK-N-SH	Neuroblastoma cell	Brain	0.117843	0.0988822	0.104258	0.106441	0.500638
1470	46145	ZBTB33	GM12878	B Lymphocyte	Blood	0.103619	0.111409	0.104705	0.106472	0.500638
1471	69814	NELFE	MCF-7	Human Breast Cancer Cell	Breast	0.11877	0.0972986	0.106085	0.106699	0.50136
1472	55782	CTCF	MCF-7	Epithelium	Breast	0.15173	0.0812988	0.107976	0.106833	0.501376
1473	45971	IRF1	K562	Erythroblast	Bone Marrow	0.112727	0.102393	0.106032	0.106888	0.501376
1474	46230	CEBPD	HepG2	Epithelium	Liver	0.105157	0.136879	0.0886715	0.10692	0.501376
1475	8410	GATA1	None	Proerythroblast	Blood	0.130935	0.0751039	0.139745	0.107054	0.501665
1476	55127	PPARG	None	None	Adipose	0.113542	0.0975324	0.111862	0.107162	0.501834
1477	45907	MAX	K562	Erythroblast	Bone Marrow	0.127984	0.0841209	0.120665	0.107329	0.501955
1478	33174	MYC	U87	None	Brain	0.158579	0.0729413	0.124203	0.107334	0.501955
1479	2305	ESR1	MCF-7	Epithelium	Breast	0.134386	0.0761874	0.134749	0.107491	0.502352
1480	71669	CTCF	786-O	Epithelium	Kidney	0.223152	0.0834512	0.0856708	0.107572	0.502389
1481	47603	GATA6	KATO III	None	Stomach	0.106815	0.102525	0.114682	0.107785	0.503044
1482	69623	STAG1	None	Erythroid Cell	None	0.159513	0.118105	0.0761795	0.108068	0.503824
1483	47084	HIF1A	None	Macrophage	None	0.107311	0.110119	0.107137	0.108172	0.503824
1484	4932	NANOG	H1	Embryonic Stem Cell	Embryo	0.113369	0.0989569	0.114125	0.108367	0.503824
1485	63049	ZNF292	HEK293	Epithelium	Embryonic Kidney	0.105209	0.109005	0.111242	0.10843	0.503824
1486	47078	TAL1	None	Erythroid Cell	None	0.11228	0.102182	0.111512	0.108466	0.503824
1487	2280	E2F1	MCF-7	Epithelium	Breast	0.138524	0.153033	0.0714097	0.108583	0.503824
1488	50879	SPI1	None	None	None	0.125874	0.111089	0.0934738	0.108584	0.503824
1489	63304	ZBTB11	K562	Erythroblast	Bone Marrow	0.124247	0.0865633	0.124774	0.108762	0.503824
1490	45558	CTCF	A549	Epithelium	Lung	0.176158	0.0956333	0.0866357	0.108838	0.503824
1491	55124	PPARG	None	None	Adipose	0.122883	0.097408	0.10909	0.10885	0.503824
1492	8105	MYC	HepG2	Epithelium	Liver	0.106395	0.115876	0.104912	0.108859	0.503824
1493	63001	BCL3	A549	Epithelium	Lung	0.117923	0.0895578	0.126147	0.108895	0.503824
1494	69815	NELFE	MCF-7	Human Breast Cancer Cell	Breast	0.115647	0.112355	0.100078	0.108951	0.503824
1495	1992	FOS	K562	Erythroblast	Bone Marrow	0.117663	0.0932459	0.120441	0.109045	0.503824
1496	45959	FOS	K562	Erythroblast	Bone Marrow	0.117663	0.0932459	0.120441	0.109045	0.503824
1497	2000	GATA1	K562	Erythroblast	Bone Marrow	0.0920556	0.0894748	0.179672	0.109145	0.50395
1498	46304	HDAC2	K562	Erythroblast	Bone Marrow	0.147543	0.0846272	0.112284	0.109318	0.504408
1499	48632	IRF4	H929	B Lymphocyte	Bone Marrow	0.099867	0.117636	0.112445	0.109481	0.504823
1500	74352	OTX2	D-341	None	None	0.0922592	0.146222	0.103696	0.109975	0.50631
1501	46270	ZBTB33	K562	Erythroblast	Bone Marrow	0.115828	0.107558	0.107027	0.11	0.50631
1502	47597	KLF5	AGS	Epithelium	Stomach	0.117319	0.10277	0.110914	0.110023	0.50631
1503	45710	CTCF	None	Myocyte	Heart	0.281528	0.0566261	0.151238	0.110096	0.50631
1504	75839	MYOD1	Rh4	rhabdomyosarcoma	None	0.131704	0.0863566	0.124133	0.110335	0.506947
1505	64320	DPF2	K562	Erythroblast	Bone Marrow	0.100581	0.0956862	0.146501	0.110381	0.506947
1506	68324	ESR1	LY2	None	Breast	0.0996349	0.102015	0.136493	0.110527	0.507279
1507	562	VDR	GM10855	Lymphocyte	Blood	0.132863	0.0951257	0.110261	0.110752	0.507975
1508	56843	KRAB	K562	Erythroblast	Bone Marrow	0.109343	0.102031	0.123472	0.110952	0.508358
1509	72449	NCOA1	U2OS	None	Bone	0.110904	0.111128	0.111128	0.111053	0.508358
1510	65107	ZNF418	HEK293	Epithelium	Embryonic Kidney	0.111996	0.108694	0.112554	0.111056	0.508358
1511	75139	RELA	Huh7	Epithelium	Liver	0.153825	0.0751088	0.137251	0.111162	0.508506
1512	45426	CHD1	K562	Erythroblast	Bone Marrow	0.121999	0.0965558	0.118716	0.111256	0.508598
1513	1794	SND1	IB4	Lymphocyte	Blood	0.126148	0.0927923	0.122064	0.111627	0.509557
1514	33487	ESR1	None	Epithelium	Mammary Gland	0.102447	0.104475	0.1324	0.111647	0.509557
1515	46136	GABPA	GM12878	B Lymphocyte	Blood	0.127937	0.0999236	0.110518	0.111687	0.509557
1516	64978	WT1	HEK293	Epithelium	Embryonic Kidney	0.105034	0.127553	0.105525	0.111824	0.509682
1517	1878	RBL2	IMR90	Fibroblast	Lung	0.114437	0.117409	0.104691	0.11192	0.509682
1518	64912	BCL3	A549	Epithelium	Lung	0.100997	0.129669	0.108692	0.111935	0.509682
1519	45838	CTCF	None	Epithelium	Mammary Gland	0.323615	0.0506036	0.211218	0.11246	0.509893
1520	34078	CDK8	None	Epithelium	Colon	0.136213	0.0953816	0.112758	0.112485	0.509893
1521	46104	YY1	ECC-1	Epithelium	Endometrium	0.137721	0.117219	0.0916646	0.112487	0.509893
1522	56427	MYC	None	Epithelium	Breast	0.11749	0.0977814	0.126079	0.112541	0.509893
1523	59542	MYC	IMEC	Epithelium	Breast	0.11749	0.0977814	0.126079	0.112541	0.509893
1524	43448	GFI1B	None	Proerythroblast	Bone Marrow	0.116308	0.108546	0.113055	0.11255	0.509893
1525	45872	TAL1	K562	Erythroblast	Bone Marrow	0.100669	0.0959851	0.157353	0.112571	0.509893
1526	35087	BCOR	None	B Lymphocyte	None	0.118622	0.137291	0.0914289	0.1127	0.509893
1527	53299	SPI1	TSU-1621-MT	None	None	0.141836	0.0788368	0.144187	0.11287	0.509893
1528	73518	BRD4	SUM159PT	mammary carcinoma cell line	Breast	0.112829	0.108231	0.117958	0.112873	0.509893
1529	49869	GABPA	SK-N-MC	None	Brain	0.12225	0.109168	0.108223	0.11288	0.509893
1530	4972	RELA	GM12878	B Lymphocyte	Blood	0.10332	0.12279	0.114163	0.112882	0.509893
1531	38204	CTCF	FB8470	Fibroblast	None	0.181251	0.140074	0.0710319	0.113002	0.509893
1532	45704	CTCF	HA-sp	Astrocyte	Spinal Cord	0.235565	0.0635898	0.14429	0.113075	0.509893
1533	2750	CREBBP	T98G	None	Brain	0.112388	0.113019	0.113971	0.113122	0.509893
1534	42536	CTCF	GM2610	Lymphoblastoid	Blood	0.163227	0.127642	0.0792508	0.113319	0.509893
1535	1958	BCL6	JURL_MK1	Haematopoietic Progenitor Cell	Bone Marrow	0.178604	0.102402	0.0892512	0.113368	0.509893
1536	48337	SNAI2	None	Keratinocyte	None	0.0793862	0.184153	0.116639	0.11338	0.509893
1537	74939	CUX1	K562	Leukemia Cell	None	0.102204	0.110754	0.130756	0.113425	0.509893
1538	55860	BRD4	293T-Rex	None	None	0.114292	0.114403	0.112043	0.113569	0.509893
1539	8414	SMAD1	None	Proerythroblast	Blood	0.123442	0.103513	0.115535	0.113589	0.509893
1540	38590	E2F7	IMR90	Fibroblast	Lung	0.122389	0.104108	0.11598	0.113666	0.509893
1541	46297	E2F6	K562	Erythroblast	Bone Marrow	0.155016	0.0972604	0.103013	0.113678	0.509893
1542	67519	GATA3	MDA-MB-231	Epithelium	Mammary Gland	0.113883	0.116161	0.111324	0.113757	0.509913
1543	42708	ATF2	LoVo	None	Colon	0.131988	0.0883066	0.133425	0.113838	0.509947
1544	63364	ZNF318	K562	Erythroblast	Bone Marrow	0.113267	0.105948	0.124907	0.114207	0.51127
1545	77133	ZNF343	293T	None	None	0.127178	0.112058	0.105635	0.114301	0.511356
1546	44761	TP63	None	Keratinocyte	Foreskin	0.12618	0.0694901	0.236473	0.114389	0.511421
1547	46007	FOS	MCF-10A	Epithelium	Breast	0.087004	0.114286	0.166077	0.114581	0.511766
1548	73933	ZNF680	293T	None	None	0.088403	0.109503	0.171873	0.11463	0.511766
1549	77022	ZNF879	293T	None	None	0.113802	0.110099	0.120634	0.114688	0.511766
1550	33610	FAIRE	None	Endothelial Cell	Umbilical Vein	0.104313	0.118949	0.122829	0.114814	0.511998
1551	62547	CUX1	MCF-7	Epithelium	Breast	0.108004	0.118963	0.118506	0.114938	0.512221
1552	76247	CTCF	MCF10CA1a	Epithelium	Breast	0.354705	0.0469229	0.308416	0.115357	0.513437
1553	7487	JUNB	K562	Erythroblast	Bone Marrow	0.154995	0.0692378	0.187671	0.115413	0.513437
1554	54240	PGR	None	Stromal Cell	Endometrium	0.128254	0.0854989	0.152342	0.115436	0.513437
1555	73523	BRD4	SUM159PT	mammary carcinoma cell line	Breast	0.164703	0.0771294	0.141568	0.115508	0.513437
1556	46284	TEAD4	K562	Erythroblast	Bone Marrow	0.222396	0.0542827	0.267332	0.115603	0.513526
1557	72612	SP1	A375	Melanoma Cell	None	0.126259	0.107221	0.115207	0.115734	0.513777
1558	42570	CTCF	MS1	Lymphoblastoid	Blood	0.113023	0.171997	0.0887665	0.116109	0.514836
1559	46015	CTCF	NHDF-neo	Fibroblast	Skin	0.236016	0.0659024	0.147411	0.116121	0.514836
1560	63415	CEBPB	A549	Epithelium	Lung	0.0914921	0.12854	0.140023	0.116226	0.514971
1561	2282	E2F1	MCF-7	Epithelium	Breast	0.130902	0.13496	0.0928836	0.116362	0.515225
1562	46279	USF1	K562	Erythroblast	Bone Marrow	0.0934894	0.121908	0.144829	0.116432	0.515225
1563	72977	CTCF	COLO-829	None	None	0.266264	0.0594323	0.175274	0.116536	0.515353
1564	63554	MIER1	K562	Erythroblast	Bone Marrow	0.111412	0.127229	0.112907	0.116785	0.515778
1565	33496	FOXA1	MCF-7	Epithelium	Breast	0.156475	0.0832248	0.136457	0.116973	0.515778
1566	45936	NFYB	K562	Erythroblast	Bone Marrow	0.114344	0.109785	0.128272	0.116982	0.515778
1567	2749	CREBBP	T98G	None	Brain	0.122847	0.1125	0.116177	0.117027	0.515778
1568	38183	MYC	MCF-7	Epithelium	Breast	0.178277	0.0830136	0.123873	0.117143	0.515778
1569	7485	GATA2	K562	Erythroblast	Bone Marrow	0.10006	0.116038	0.14265	0.117201	0.515778
1570	74671	ZNF639	K562	Erythroblast	Bone Marrow	0.114078	0.113427	0.124755	0.117207	0.515778
1571	63756	ZBTB33	None	None	Liver	0.136428	0.103338	0.116289	0.117229	0.515778
1572	46177	E2F6	H1	Embryonic Stem Cell	Embryo	0.100472	0.274989	0.0810628	0.117454	0.516441
1573	42551	STAG1	GM2610	Lymphoblastoid	Blood	0.273051	0.0773258	0.107798	0.117715	0.516962
1574	8460	CEBPA	U937	None	Pleura	0.11695	0.11832	0.118091	0.117784	0.516962
1575	56290	LMNA	None	Adipocyte	None	0.118652	0.116572	0.118187	0.117797	0.516962
1576	56264	AR	CWR22Pc	Epithelium	Prostate	0.179287	0.15456	0.0736391	0.117926	0.5172
1577	38200	MYC	H54	Glial Cell	Brain	0.122574	0.113285	0.119981	0.118488	0.519335
1578	45899	CTCF	K562	Erythroblast	Bone Marrow	0.147333	0.0954538	0.123858	0.11858	0.519409
1579	42383	STAG1	GM18505	Lymphoblastoid	Blood	0.313662	0.0614003	0.155748	0.118811	0.520083
1580	64556	IKZF2	HEK293	Epithelium	Embryonic Kidney	0.160936	0.240591	0.0656868	0.119043	0.520083
1581	64465	RELA	K562	Erythroblast	Bone Marrow	0.117426	0.119414	0.120417	0.119073	0.520083
1582	54080	ESR1	MCF-7	Epithelium	Breast	0.115172	0.126812	0.115935	0.119088	0.520083
1583	65171	ZNF18	HEK293	Epithelium	Embryonic Kidney	0.123704	0.107254	0.128429	0.119111	0.520083
1584	58940	NRF1	HCC1954	Epithelium	Mammary Gland	0.165468	0.148041	0.0800783	0.119233	0.520289
1585	69809	NELFE	MCF-7	Human Breast Cancer Cell	Breast	0.120325	0.121719	0.116722	0.119553	0.521105
1586	53874	MEF2B	HEK293A	None	None	0.160279	0.0699911	0.206656	0.119571	0.521105
1587	48279	CEBPA	GM12878	B Lymphocyte	Blood	0.144487	0.0929251	0.13455	0.119668	0.521199
1588	7527	HEY1	K562	Erythroblast	Bone Marrow	0.157372	0.103267	0.111578	0.120195	0.523166
1589	8820	RBBP5	H1	Embryonic Stem Cell	Embryo	0.098528	0.334868	0.0809059	0.120435	0.523566
1590	49481	RPE	None	Retinal pigment cell	None	0.14258	0.101415	0.124091	0.120438	0.523566
1591	38832	TP73	LoVo	None	Colon	0.123323	0.109739	0.130617	0.120623	0.523676
1592	73525	BRD4	SUM159PT	mammary carcinoma cell line	Breast	0.176057	0.0812774	0.142941	0.120744	0.523676
1593	63213	MTA2	GM12878	B Lymphocyte	Blood	0.10017	0.107783	0.176589	0.120749	0.523676
1594	42918	CTCF	GP5d	None	Colon	0.336707	0.0527139	0.253737	0.12078	0.523676
1595	70568	MYC	U2OS	None	Bone	0.111502	0.117762	0.135672	0.120858	0.523676
1596	64538	JUNB	K562	Erythroblast	Bone Marrow	0.123814	0.107722	0.134447	0.121028	0.523676
1597	42212	STAT3	OCI-Ly10	B Lymphocyte	Bone Marrow	0.194744	0.0715391	0.169821	0.121227	0.523676
1598	48301	REST	GM12878	B Lymphocyte	Blood	0.126817	0.11201	0.125994	0.121231	0.523676
1599	63426	DDX20	K562	Erythroblast	Bone Marrow	0.124698	0.11597	0.1234	0.121238	0.523676
1600	45640	SMC3	GM12878	B Lymphocyte	Blood	0.241033	0.0619793	0.202081	0.12132	0.523676
1601	71214	FOXA1	LNCaP	Epithelium	Prostate	0.462644	0.0497344	0.247323	0.12137	0.523676
1602	4598	STAT6	None	T Lymphocyte	Cord blood	0.122063	0.121732	0.120428	0.121404	0.523676
1603	74382	RELA	MCF-7	None	Breast	0.107646	0.118595	0.14292	0.121449	0.523676
1604	44325	E2F1	LNCaP	Epithelium	Prostate	0.186618	0.126121	0.0871369	0.121747	0.524637
1605	8455	CEBPA	K562	Erythroblast	Bone Marrow	0.118765	0.102498	0.154744	0.121938	0.524749
1606	51360	PSIP1	None	T Lymphocyte	None	0.137357	0.0920635	0.153673	0.122001	0.524749
1607	45755	ELK4	HeLa-S3	Epithelium	Cervix	0.122269	0.127912	0.116517	0.122064	0.524749
1608	63665	CEBPB	A549	Epithelium	Lung	0.113775	0.141739	0.114548	0.122141	0.524749
1609	49010	CPSF3L	HeLa	Epithelium	Cervix	0.108886	0.137031	0.123795	0.122207	0.524749
1610	45995	CTCF	MCF-7	Epithelium	Breast	0.23811	0.0715663	0.14948	0.122289	0.524749
1611	50397	MYB	Jurkat	T Lymphocyte	Blood	0.143039	0.109166	0.119574	0.122454	0.524749
1612	39767	PR	T47D	Epithelium	Mammary Gland	0.112933	0.150664	0.110833	0.122497	0.524749
1613	73512	BRD4	SUM159PT	mammary carcinoma cell line	Breast	0.114827	0.13484	0.119597	0.122546	0.524749
1614	52574	CHRM2	None	Stromal Cell	Endometrium	0.11166	0.112755	0.149933	0.122594	0.524749
1615	47847	REST	GM12878	B Lymphocyte	Blood	0.120503	0.115873	0.132566	0.122608	0.524749
1616	74140	ESR1	T47D	None	Breast	0.118423	0.112111	0.141335	0.122813	0.5253
1617	41574	BRD1	RKO	Epithelium	Colon	0.138647	0.119423	0.114006	0.123208	0.526664
1618	68121	KDM1A	SKNO-1	Myeloblast	Bone Marrow	0.122169	0.10645	0.147825	0.123346	0.526929
1619	62802	PTRF	K562	Erythroblast	Bone Marrow	0.125128	0.121537	0.123991	0.123535	0.527378
1620	67735	FOXA1	LNCaP	Epithelium	Prostate	0.159492	0.0880865	0.148469	0.123612	0.527378
1621	72383	SIX1	None	Cortex	Embryonic Kidney	0.119616	0.122833	0.128932	0.123681	0.527378
1622	38719	DLX1	LoVo	None	Colon	0.171595	0.0813464	0.161018	0.124046	0.528516
1623	52632	ESR1	MCF-7	Epithelium	Breast	0.130028	0.121891	0.120764	0.1241	0.528516
1624	74007	ESR1	None	None	endometrioid adenocarcinoma	0.139436	0.0974688	0.147825	0.124204	0.528593
1625	32874	FAIRE	MCF7-LTED	Epithelium	Mammary Gland	0.126682	0.131573	0.115604	0.124271	0.528593
1626	50573	MYB	None	None	None	0.17715	0.118305	0.0991183	0.124424	0.528918
1627	33148	GATA3	MCF-7	Epithelium	Breast	0.120877	0.0937156	0.19055	0.124586	0.52928
1628	50987	CTCF	H1	Embryonic Stem Cell	Embryo	0.150548	0.281944	0.0698671	0.124826	0.529676
1629	64209	ZNF207	HepG2	Epithelium	Liver	0.1233	0.124021	0.127373	0.124874	0.529676
1630	64704	YBX1	MCF-7	Epithelium	Breast	0.121455	0.126651	0.126763	0.124909	0.529676
1631	48318	ZBTB33	GM12878	B Lymphocyte	Blood	0.124069	0.12389	0.127713	0.125201	0.530587
1632	39654	CREBBP	LS180	Epithelium	Colon	0.127225	0.123912	0.125273	0.125456	0.531279
1633	57188	NANOG	None	Embryonic Stem Cell	None	0.13393	0.107694	0.139565	0.125518	0.531279
1634	45230	CTCF	H1	Embryonic Stem Cell	Embryo	0.176523	0.11361	0.105472	0.12562	0.531309
1635	5969	MYC	Ramos	B Lymphocyte	None	0.125979	0.116004	0.136743	0.125704	0.531309
1636	74341	NEUROD1	D283 Med	None	None	0.138688	0.11458	0.126175	0.125755	0.531309
1637	63951	ZNF641	HEK293	Epithelium	Embryonic Kidney	0.126255	0.124483	0.127006	0.125906	0.53162
1638	7484	FOS	K562	Erythroblast	Bone Marrow	0.116169	0.109099	0.165046	0.126101	0.532117
1639	55668	PAF1	HCT-116	None	Colon	0.122649	0.146348	0.114678	0.12662	0.533981
1640	45645	CTCF	GM12878	B Lymphocyte	Blood	0.180227	0.0867454	0.149588	0.126928	0.534763
1641	49417	RB1	IMR90	Fibroblast	Lung	0.132058	0.128316	0.121178	0.127031	0.534763
1642	68223	NR3C1	BEAS-2B	Epithelium	Lung	0.13371	0.107835	0.145301	0.12704	0.534763
1643	46082	PBX3	A549	Epithelium	Lung	0.120329	0.12429	0.137953	0.127114	0.534763
1644	71808	FOXA1	MCF-7	None	Breast	0.158167	0.108415	0.124159	0.127286	0.53491
1645	36231	DCP1A	HeLa	Epithelium	Cervix	0.14005	0.112934	0.132198	0.127394	0.53491
1646	46129	EBF1	GM12878	B Lymphocyte	Blood	0.146988	0.109041	0.131683	0.127396	0.53491
1647	71320	RAD21	HCT-116	Colon cancer cell	Colon	0.200947	0.171472	0.077122	0.127459	0.53491
1648	55339	SUMO2	K562	Erythroblast	Bone Marrow	0.163921	0.130631	0.102019	0.12761	0.535071
1649	71069	MBD3	HeLa	Epithelium	Cervix	0.210111	0.105369	0.106804	0.127809	0.535071
1650	45646	CHD1	GM12878	B Lymphocyte	Blood	0.134951	0.11894	0.130778	0.127874	0.535071
1651	55172	RUNX1	None	Myeloid Cell	None	0.115156	0.117522	0.158887	0.127884	0.535071
1652	8481	RUNX1	None	Myeloblast	Blood	0.115156	0.117522	0.158887	0.127884	0.535071
1653	58805	MYB	None	Th1	None	0.120062	0.196636	0.0990601	0.128216	0.535154
1654	46365	USF1	SK-N-SH_RA	Neuron	Brain	0.203544	0.100992	0.114879	0.128234	0.535154
1655	45771	STAT3	HeLa-S3	Epithelium	Cervix	0.107949	0.139659	0.143462	0.128352	0.535154
1656	55342	SUMO2	K562	Erythroblast	Bone Marrow	0.0977335	0.137908	0.167923	0.128353	0.535154
1657	6573	CTCF	MCF-7	Epithelium	Breast	0.18529	0.115604	0.106411	0.128394	0.535154
1658	47872	REST	Jurkat	T Lymphocyte	Blood	0.131189	0.123769	0.130552	0.128419	0.535154
1659	50365	SPI1	None	Monocyte	None	0.12774	0.106244	0.162477	0.128446	0.535154
1660	42947	HNF4A	LoVo	None	Colon	0.129961	0.120168	0.137597	0.128867	0.536342
1661	46103	ESR1	ECC-1	Epithelium	Endometrium	0.0954356	0.155803	0.15507	0.128887	0.536342
1662	62671	ATF1	K562	Erythroblast	Bone Marrow	0.130787	0.110297	0.152383	0.12902	0.536572
1663	46115	POU2F2	GM12878	B Lymphocyte	Blood	0.129434	0.151739	0.112216	0.129266	0.537275
1664	69770	BRD4	MV4;11	Leukemia Cell	Blood	0.157843	0.109476	0.129146	0.1294	0.537318
1665	76812	NEUROG2	None	Fibroblast	Fetal Lung	0.148977	0.0968682	0.161082	0.129432	0.537318
1666	4971	RELA	GM12878	B Lymphocyte	Blood	0.136233	0.122209	0.131219	0.129638	0.537851
1667	70965	BRD4	Raji	B Lymphocyte	Blood	0.125088	0.133069	0.131462	0.129785	0.537898
1668	38174	EBNA3	Mutu III	B Lymphocyte	None	0.129539	0.106816	0.164877	0.129841	0.537898
1669	35717	UBE2I	WI-38	Fibroblast	Lung	0.126905	0.139603	0.124101	0.129883	0.537898
1670	45742	KAT2B	HeLa-S3	Epithelium	Cervix	0.129032	0.130942	0.130956	0.130304	0.539317
1671	393	NOTCH1	CUTLL1	T Lymphocyte	Blood	0.12771	0.117174	0.152054	0.130858	0.541192
1672	64369	MYNN	K562	Erythroblast	Bone Marrow	0.144049	0.101872	0.161086	0.130913	0.541192
1673	8411	GATA1	None	Proerythroblast	Blood	0.140745	0.0887653	0.212761	0.131036	0.541375
1674	64917	CBX1	K562	Erythroblast	Bone Marrow	0.199691	0.0914024	0.14216	0.131334	0.54146
1675	63112	HNRNPLL	HepG2	Epithelium	Liver	0.137207	0.131225	0.126803	0.131616	0.54146
1676	64560	SP2	HEK293	Epithelium	Embryonic Kidney	0.164574	0.155191	0.0966833	0.131653	0.54146
1677	64374	ZNF740	K562	Erythroblast	Bone Marrow	0.13382	0.137819	0.124378	0.131774	0.54146
1678	45893	RFX5	K562	Erythroblast	Bone Marrow	0.137227	0.124634	0.13438	0.131868	0.54146
1679	63884	BCL3	A549	Epithelium	Lung	0.17919	0.116801	0.115674	0.131979	0.54146
1680	51522	OTX2	HUES64	Embryonic Stem Cell	Embryo	0.103714	0.205021	0.120564	0.132184	0.54146
1681	63686	ZBTB8A	HEK293	Epithelium	Embryonic Kidney	0.127075	0.265627	0.0879782	0.132218	0.54146
1682	63874	MTA2	MCF-7	Epithelium	Breast	0.131757	0.132969	0.131999	0.13224	0.54146
1683	5388	RELA	A549	Epithelium	Lung	0.14719	0.159235	0.103579	0.132264	0.54146
1684	55348	SUMO2	K562	Erythroblast	Bone Marrow	0.145047	0.12771	0.125668	0.132295	0.54146
1685	42520	CTCF	GM2588	Lymphoblastoid	Blood	0.160379	0.132837	0.111834	0.132298	0.54146
1686	33180	MYC	H128	Epithelium	Lung	0.15368	0.12413	0.123071	0.132307	0.54146
1687	42255	CTCF	GM10847	Lymphoblastoid	Blood	0.238204	0.0856801	0.141791	0.132318	0.54146
1688	74346	NEUROD1	D-341	None	None	0.150961	0.144568	0.10924	0.132344	0.54146
1689	62672	HES1	K562	Erythroblast	Bone Marrow	0.14784	0.103661	0.158772	0.132375	0.54146
1690	73952	ZNF382	293T	None	None	0.120325	0.143108	0.135763	0.132407	0.54146
1691	45390	KDM5B	K562	Erythroblast	Bone Marrow	0.161296	0.121609	0.121483	0.132564	0.54146
1692	63383	USF2	K562	Erythroblast	Bone Marrow	0.116871	0.156413	0.129989	0.132606	0.54146
1693	46070	MAX	A549	Epithelium	Lung	0.138157	0.245207	0.0865386	0.132685	0.54146
1694	63525	ZFP2	HEK293	Epithelium	Embryonic Kidney	0.148839	0.168911	0.0996374	0.132701	0.54146
1695	54081	ESR1	MCF-7	Epithelium	Breast	0.131371	0.135124	0.132116	0.132852	0.541754
1696	46064	USF1	A549	Epithelium	Lung	0.125134	0.1508	0.126093	0.133077	0.54235
1697	42271	CTCF	GM12878	B Lymphocyte	Blood	0.19208	0.122708	0.108236	0.133267	0.542607
1698	63207	GABPA	K562	Erythroblast	Bone Marrow	0.145252	0.126461	0.129552	0.133297	0.542607
1699	67718	CREB1	LNCaP	Epithelium	Prostate	0.195991	0.108377	0.121196	0.133398	0.542679
1700	38115	MYC	HeLa	Epithelium	Cervix	0.173066	0.158519	0.0955469	0.133576	0.542679
1701	54675	YAP1	NCI-H2052	Epithelium	Lung	0.125672	0.0930095	0.250355	0.133616	0.542679
1702	42876	YBX1	LoVo	None	Colon	0.132603	0.135418	0.132898	0.133629	0.542679
1703	43104	NOTCH1	CUTLL1	T Lymphocyte	Blood	0.141812	0.135347	0.126084	0.13412	0.544255
1704	42588	STAG1	MS1	Lymphoblastoid	Blood	0.233797	0.0946088	0.12985	0.134253	0.544255
1705	35740	FAIRE	MCF-7	Epithelium	Breast	0.109504	0.3685	0.0896629	0.134267	0.544255
1706	38589	E2F7	IMR90	Fibroblast	Lung	0.129946	0.135273	0.138109	0.134362	0.544255
1707	33127	ESR1	MCF-7	Epithelium	Breast	0.104177	0.161137	0.153013	0.134596	0.544255
1708	33611	FAIRE	None	Endothelial Cell	Umbilical Vein	0.102653	0.166208	0.151799	0.134612	0.544255
1709	1218	GATAD1	HeLa	Epithelium	Cervix	0.127703	0.128847	0.149258	0.134622	0.544255
1710	45661	MAZ	GM12878	B Lymphocyte	Blood	0.25689	0.0775733	0.170934	0.134735	0.544255
1711	42552	CTCF	GM2630	Lymphoblastoid	Blood	0.152642	0.162074	0.10432	0.134798	0.544255
1712	8458	GATA1	K562	Erythroblast	Bone Marrow	0.181968	0.105638	0.135854	0.134804	0.544255
1713	35085	BCL6	None	B Lymphocyte	None	0.133394	0.13468	0.137424	0.135146	0.544436
1714	54088	ESR1	MCF-7	Epithelium	Breast	0.132618	0.138539	0.134511	0.135181	0.544436
1715	64619	TRIM22	GM12878	B Lymphocyte	Blood	0.182656	0.110873	0.128893	0.135184	0.544436
1716	71207	PIAS1	LNCaP	Epithelium	Prostate	0.281726	0.0738574	0.179509	0.13523	0.544436
1717	41290	STAT1	None	Monocyte	Blood	0.141432	0.118559	0.149467	0.135243	0.544436
1718	45865	CTCF	IMR90	Fibroblast	Lung	0.263992	0.0833413	0.149335	0.135434	0.544888
1719	46258	TAF1	HepG2	Epithelium	Liver	0.107863	0.231238	0.115098	0.13568	0.545107
1720	71863	ESR1	MCF-7	None	Breast	0.144388	0.123522	0.141	0.135702	0.545107
1721	74830	T	T47D	None	None	0.14265	0.107373	0.171495	0.135725	0.545107
1722	1222	TRRAP	HeLa	Epithelium	Cervix	0.132554	0.136926	0.138049	0.135804	0.545109
1723	68054	ESR1	LTED	None	Breast	0.133567	0.137701	0.136732	0.135978	0.545492
1724	32808	BRD4	P493-6	B cell lymphoma	None	0.143227	0.109106	0.168519	0.136134	0.545599
1725	62635	HDAC2	K562	Erythroblast	Bone Marrow	0.148065	0.108069	0.164763	0.136163	0.545599
1726	48249	WDR5	LNCaP	Epithelium	Prostate	0.135253	0.13745	0.136229	0.136305	0.545853
1727	2916	ERG	VCaP	Epithelium	Prostate	0.164378	0.137316	0.115558	0.136418	0.545989
1728	39577	BACH2	OCI-Ly7	B cell lymphoma	Blood	0.1526	0.103099	0.173485	0.136682	0.546728
1729	37384	RUNX1	Jurkat E6-1	T Lymphocyte	Blood	0.118496	0.158166	0.139243	0.136836	0.547027
1730	6572	CTCF	MCF-7	Epithelium	Breast	0.272535	0.069744	0.226133	0.137255	0.548384
1731	55667	PAF1	HCT-116	None	Colon	0.135636	0.205228	0.103147	0.137452	0.548757
1732	45926	MAX	K562	Erythroblast	Bone Marrow	0.146307	0.143909	0.124368	0.137507	0.548757
1733	55513	YAP1	IMR90	Fibroblast	Lung	0.249428	0.0699135	0.248678	0.1378	0.54961
1734	55284	5MC	LNCaP	Epithelium	Prostate	0.161157	0.144005	0.115831	0.13789	0.54965
1735	38852	ATF1	LoVo	None	Colon	0.143995	0.129555	0.141701	0.138137	0.550318
1736	2393	STAG1	MCF-7	Epithelium	Breast	0.237348	0.0986174	0.132562	0.13825	0.550362
1737	65197	KLF15	HEK293	Epithelium	Embryonic Kidney	0.149454	0.246733	0.0892867	0.138337	0.550362
1738	41127	ESR1	None	Epithelium	Mammary Gland	0.139051	0.138446	0.138223	0.138572	0.550362
1739	5046	CTCF	GM19240	Lymphoblastoid	Blood	0.179365	0.179179	0.0941365	0.138583	0.550362
1740	58079	KDM2B	None	Myeloid Cell	None	0.153567	0.187724	0.101027	0.138616	0.550362
1741	69799	NR1H3	HT29	colorectal adenocarcinoma	None	0.19784	0.120298	0.119712	0.138626	0.550362
1742	33707	SOX2	BJ	Fibroblast	Skin	0.274624	0.0664367	0.274388	0.138862	0.550398
1743	33032	ARNT	MCF-7	Epithelium	Breast	0.0633207	0.420791	0.219185	0.138962	0.550398
1744	559	VDR	GM10855	Lymphocyte	Blood	0.18318	0.132999	0.115621	0.139054	0.550398
1745	43163	GATA6	HUG1N	None	Stomach	0.143291	0.125761	0.150567	0.139121	0.550398
1746	32856	TERC	HeLa	Epithelium	Cervix	0.205235	0.315817	0.070594	0.139186	0.550398
1747	63411	CBX5	GM12878	B Lymphocyte	Blood	0.189672	0.0813337	0.233001	0.139227	0.550398
1748	51054	FOXA1	VCaP	Epithelium	Prostate	0.154559	0.168282	0.108915	0.139249	0.550398
1749	68632	KMT2D	None	patient derived xenograft cells	None	0.146454	0.116193	0.163024	0.139272	0.550398
1750	38724	GMEB2	LoVo	None	Colon	0.131806	0.168199	0.125352	0.139623	0.550874
1751	45924	MAZ	K562	Erythroblast	Bone Marrow	0.194013	0.180931	0.0918318	0.140152	0.550874
1752	8549	RNF2	HEK293T	Epithelium	Embryonic Kidney	0.147568	0.125448	0.150392	0.140266	0.550874
1753	38586	E2F7	IMR90	Fibroblast	Lung	0.13238	0.13243	0.159104	0.14032	0.550874
1754	38736	NKX2-2	LoVo	None	Colon	0.143326	0.136298	0.141573	0.140339	0.550874
1755	65196	ZNF586	HEK293	Epithelium	Embryonic Kidney	0.148534	0.129122	0.144979	0.140388	0.550874
1756	62681	ZNF16	HEK293	Epithelium	Embryonic Kidney	0.143428	0.13514	0.142945	0.140406	0.550874
1757	77263	NFIA	K562	Erythroblast	Bone Marrow	0.137779	0.14985	0.134441	0.140406	0.550874
1758	62533	BCL3	A549	Epithelium	Lung	0.187642	0.112331	0.138948	0.140417	0.550874
1759	55866	BRD4	293T-Rex	None	None	0.14018	0.140429	0.140679	0.140429	0.550874
1760	50021	BMI1	K562	Erythroblast	Bone Marrow	0.165095	0.107804	0.164663	0.14052	0.550874
1761	71137	BRD4	MCF-10A	Epithelium	None	0.145105	0.185879	0.109392	0.140544	0.550874
1762	67686	ZBTB7A	None	Erythroblast	None	0.142534	0.164004	0.121228	0.140577	0.550874
1763	49494	CDK7	Jurkat	T Lymphocyte	Blood	0.236031	0.091726	0.155739	0.140612	0.550874
1764	37334	CREB1	A549	Epithelium	Lung	0.150846	0.136751	0.135659	0.140779	0.550874
1765	46362	TCF12	SK-N-SH	Neuroblastoma cell	Brain	0.136089	0.186022	0.115903	0.14087	0.550874
1766	45966	RAD21	K562	Erythroblast	Bone Marrow	0.379042	0.0561278	0.402114	0.140891	0.550874
1767	62593	RFX1	K562	Erythroblast	Bone Marrow	0.124691	0.141066	0.161391	0.140917	0.550874
1768	39783	RUNX1	Kasumi-1	Myeloblast	Blood	0.133777	0.131819	0.160462	0.140965	0.550874
1769	70814	SP1	HCT-116	Colon cancer cell	Colon	0.154177	0.293776	0.0847433	0.140986	0.550874
1770	67748	GATA2	LNCaP	Epithelium	Prostate	0.171837	0.0958754	0.194424	0.141146	0.550948
1771	75287	ZBTB48	HeLa	None	None	0.147498	0.146048	0.131265	0.141236	0.550948
1772	54136	CEBPB	None	Mesenchymal Stem Cell	None	0.120201	0.120295	0.212313	0.141267	0.550948
1773	45954	MAFK	K562	Erythroblast	Bone Marrow	0.294411	0.0748729	0.199929	0.141397	0.550948
1774	45189	CTCF	DND-41	T Lymphocyte	Blood	0.214976	0.0804354	0.223577	0.141411	0.550948
1775	63463	IKZF1	K562	Erythroblast	Bone Marrow	0.247175	0.0758046	0.22624	0.141483	0.550948
1776	45596	CTCF	GM12872	B Lymphocyte	Blood	0.280257	0.0820345	0.17137	0.141576	0.550999
1777	37177	STAT4	None	Monocyte	Blood	0.189147	0.0833853	0.23851	0.141767	0.55125
1778	7341	HEY1	HepG2	Epithelium	Liver	0.176171	0.113489	0.148901	0.1418	0.55125
1779	46111	NFIC	GM12878	B Lymphocyte	Blood	0.135989	0.104386	0.230487	0.142121	0.552188
1780	45584	CTCF	GM10248	Lymphoblastoid	Blood	0.228714	0.113433	0.124272	0.142255	0.552266
1781	45573	CTCF	BE2-C	Neuroblast	Brain	0.276456	0.0804148	0.183914	0.142376	0.552266
1782	74831	T	T47D	None	None	0.12839	0.130538	0.177195	0.142442	0.552266
1783	64823	KDM1A	K562	Erythroblast	Bone Marrow	0.158688	0.126851	0.14531	0.142486	0.552266
1784	45414	HDAC2	K562	Erythroblast	Bone Marrow	0.14053	0.149667	0.137914	0.142541	0.552266
1785	33162	MAX	P493-6	B cell lymphoma	None	0.243367	0.101283	0.138132	0.14272	0.552298
1786	45880	JUND	K562	Erythroblast	Bone Marrow	0.154977	0.200533	0.103424	0.142865	0.552298
1787	65086	ZSCAN16	HEK293	Epithelium	Embryonic Kidney	0.169367	0.0938032	0.217721	0.143054	0.552298
1788	51471	GATA4	HUES64	Embryonic Stem Cell	Embryo	0.150737	0.124797	0.157849	0.143079	0.552298
1789	45578	CTCF	Caco-2	Epithelium	Colon	0.229189	0.0797327	0.225225	0.143095	0.552298
1790	33508	ESR1	T47D	Epithelium	Mammary Gland	0.128666	0.126876	0.186784	0.143126	0.552298
1791	76252	CTCF	MCF-10A	Epithelium	None	0.339657	0.0624333	0.321112	0.143174	0.552298
1792	54612	TEAD1	SF268	None	None	0.177358	0.0999597	0.184368	0.143188	0.552298
1793	58804	MYB	None	Th1	None	0.14662	0.154621	0.131151	0.143501	0.552991
1794	34475	PAX5	Raji	B Lymphocyte	Blood	0.158451	0.120387	0.158759	0.143595	0.552991
1795	42744	RELA	LoVo	None	Colon	0.229652	0.0979814	0.153633	0.143639	0.552991
1796	46047	CTCF	WERI-Rb-1	None	Eye	0.148363	0.218699	0.103388	0.143925	0.552991
1797	75847	CTCF	Rh4	rhabdomyosarcoma	None	0.159404	0.153051	0.124647	0.14414	0.552991
1798	44599	BRD3	VCaP	Epithelium	Prostate	0.144604	0.145463	0.142427	0.144154	0.552991
1799	63902	ZXDB	HEK293	Epithelium	Embryonic Kidney	0.210881	0.117469	0.130988	0.144285	0.552991
1800	54381	LMTK3	MDA-MB-231	Epithelium	Breast	0.144595	0.145188	0.143111	0.144293	0.552991
1801	77080	ZNF587	293T	None	None	0.144726	0.144726	0.143476	0.144307	0.552991
1802	48763	EZH2	NTKO	Multiple myeloma cell	None	0.238746	0.0886213	0.179142	0.14432	0.552991
1803	43363	EBNA3C	None	B Lymphocyte	None	0.134013	0.144806	0.155981	0.144417	0.552991
1804	5453	RXRA	LS180	Epithelium	Colon	0.162331	0.131667	0.142643	0.144544	0.552991
1805	53325	SUPT5H	HeLa	Epithelium	Cervix	0.152562	0.138876	0.142832	0.144548	0.552991
1806	46228	TCF12	HepG2	Epithelium	Liver	0.124503	0.179801	0.13899	0.144553	0.552991
1807	70759	OGT	HEK293	HEK 293 Cell Line	None	0.185257	0.129228	0.130673	0.144595	0.552991
1808	46280	STAT5A	K562	Erythroblast	Bone Marrow	0.161028	0.110091	0.181481	0.144669	0.552991
1809	73719	BRD4	SEM	B Lymphocyte	None	0.162811	0.107998	0.18613	0.144963	0.552991
1810	46134	FOXM1	GM12878	B Lymphocyte	Blood	0.16796	0.123878	0.149495	0.14498	0.552991
1811	50112	MAFB	None	Keratinocyte	Foreskin	0.144056	0.149533	0.14214	0.14518	0.552991
1812	72978	CTCF	COLO-829	None	None	0.279132	0.0756385	0.227698	0.14525	0.552991
1813	63225	HNF4G	None	None	Liver	0.183017	0.110345	0.161475	0.145271	0.552991
1814	58349	MED1	LNCaP-abl	Epithelium	Prostate	0.14883	0.143167	0.144125	0.145335	0.552991
1815	33100	ESR1	MCF-7	Epithelium	Breast	0.133752	0.151661	0.15209	0.145349	0.552991
1816	54621	ESR1	MCF-7	Epithelium	Breast	0.133752	0.151661	0.15209	0.145349	0.552991
1817	64689	H2AFZ	DOHH-2	None	None	0.133598	0.237134	0.109893	0.145368	0.552991
1818	76250	CTCF	None	Epithelium	Breast	0.336419	0.0646271	0.310783	0.145531	0.553284
1819	45614	RAD21	GM12878	B Lymphocyte	Blood	0.190724	0.105201	0.168003	0.145605	0.553284
1820	45905	CHD2	K562	Erythroblast	Bone Marrow	0.14161	0.170652	0.130165	0.145735	0.553474
1821	75136	MYB	DU-528	None	Blood	0.152942	0.116261	0.185378	0.146487	0.555599
1822	5051	CTCF	GM19239	Lymphoblastoid	Blood	0.152525	0.202355	0.110328	0.14656	0.555599
1823	9237	CBX3	HCT-116	None	Colon	0.147669	0.144361	0.148026	0.146668	0.555599
1824	42883	ZNF143	LoVo	None	Colon	0.143145	0.136288	0.163106	0.146729	0.555599
1825	5451	VDR	LS180	Epithelium	Colon	0.14877	0.141549	0.150215	0.146753	0.555599
1826	62551	TFDP1	K562	Erythroblast	Bone Marrow	0.158026	0.148447	0.135535	0.146794	0.555599
1827	50161	PR	None	None	Prostate	0.148609	0.145746	0.146441	0.146922	0.555599
1828	72993	ESR1	MCF-7	None	Breast	0.159227	0.122281	0.167048	0.146938	0.555599
1829	43831	CTCF	THP-1	Monocyte	Blood	0.316152	0.0689278	0.282176	0.147305	0.556593
1830	73545	BRD4	SUM159PT	mammary carcinoma cell line	Breast	0.148961	0.129037	0.169111	0.147362	0.556593
1831	45623	CTCF	GM12878	B Lymphocyte	Blood	0.183743	0.111897	0.166026	0.147538	0.556758
1832	64982	PATZ1	HEK293	Epithelium	Embryonic Kidney	0.15459	0.272614	0.0954579	0.147675	0.556758
1833	64091	KLF8	HEK293	Epithelium	Embryonic Kidney	0.183247	0.129362	0.139783	0.147726	0.556758
1834	73509	BRD4	SUM159PT	mammary carcinoma cell line	Breast	0.1952	0.100651	0.18568	0.14774	0.556758
1835	68229	NR3C1	BEAS-2B	Epithelium	Lung	0.118516	0.16546	0.170978	0.147861	0.556758
1836	73718	BRD4	SEM	B Lymphocyte	None	0.147004	0.148401	0.148713	0.148036	0.556758
1837	48824	MBD2	MCF-7	Epithelium	Breast	0.164433	0.169341	0.120299	0.148048	0.556758
1838	42934	HNF4A	GP5d	None	Colon	0.150647	0.143261	0.150467	0.14805	0.556758
1839	67500	GATA3	MDA-MB-231	Epithelium	Mammary Gland	0.15435	0.116572	0.190377	0.148155	0.556852
1840	75274	ZBTB48	U2OS	None	None	0.153694	0.241319	0.102252	0.148248	0.556898
1841	43045	BRD2	MM1.S	B Lymphocyte	Blood	0.163971	0.11943	0.172971	0.148418	0.557165
1842	42293	STAG1	GM12878	B Lymphocyte	Blood	0.278227	0.0804333	0.214974	0.148481	0.557165
1843	63068	ZBTB40	K562	Erythroblast	Bone Marrow	0.172336	0.106743	0.196611	0.148867	0.558313
1844	65125	PRDM6	HEK293	Epithelium	Embryonic Kidney	0.157733	0.121482	0.179117	0.149142	0.558787
1845	62909	NR2F2	None	None	Liver	0.149749	0.131133	0.171594	0.149155	0.558787
1846	32898	RELA	None	Endothelial Cell	Umbilical Vein	0.151422	0.147723	0.148613	0.149237	0.558791
1847	49461	598-SKD	MCF-7	Epithelium	Breast	0.172387	0.138636	0.141339	0.149443	0.559257
1848	7301	ATF3	HepG2	Epithelium	Liver	0.150511	0.156391	0.142837	0.149722	0.559457
1849	77120	ZNF441	293T	None	None	0.129726	0.179369	0.147563	0.149749	0.559457
1850	62504	SMC3	IMR90	Fibroblast	Lung	0.418667	0.0585754	0.417842	0.149779	0.559457
1851	63514	PYGO2	K562	Erythroblast	Bone Marrow	0.15181	0.142344	0.155913	0.14982	0.559457
1852	43823	BCL11A	CAL-1	Dendritic Cell	None	0.149626	0.15155	0.14867	0.14994	0.559466
1853	4929	TAFII	H1	Embryonic Stem Cell	Embryo	0.154202	0.156612	0.140394	0.150078	0.559466
1854	68058	POLR3D	IMR90hTert	Fibroblast	Fetal Lung	0.149898	0.148317	0.15213	0.1501	0.559466
1855	53673	NIPBL	None	Embryonic Stem Cell	None	0.1335	0.210022	0.128098	0.150146	0.559466
1856	56542	TEAD1	HuCCT1	None	None	0.214875	0.093531	0.207405	0.150499	0.559935
1857	67747	GATA2	LNCaP	Epithelium	Prostate	0.131774	0.238666	0.120521	0.150533	0.559935
1858	48704	SPI1	None	Epithelium	Liver	0.151089	0.140216	0.162072	0.150638	0.559935
1859	49955	KDM3A	Jurkat	T Lymphocyte	Blood	0.152829	0.15682	0.142939	0.15065	0.559935
1860	49651	MED1	MCF-7	Epithelium	Breast	0.198346	0.109381	0.171733	0.150693	0.559935
1861	36632	CTCF	H1	Embryonic Stem Cell	Embryo	0.195304	0.147604	0.124099	0.150758	0.559935
1862	77148	ZNF282	293T	None	None	0.157752	0.15519	0.141257	0.151069	0.560788
1863	73938	ZNF584	293T	None	None	0.149723	0.152007	0.152262	0.151323	0.561339
1864	5389	RELA	A549	Epithelium	Lung	0.184135	0.183816	0.11068	0.15138	0.561339
1865	64266	HCFC1	MCF-7	Epithelium	Breast	0.142852	0.180019	0.13767	0.151536	0.56156
1866	51472	GATA4	HUES64	Embryonic Stem Cell	Embryo	0.138091	0.128633	0.206566	0.151602	0.56156
1867	46345	TAF1	SK-N-SH	Neuroblastoma cell	Brain	0.167897	0.176545	0.122001	0.151699	0.561566
1868	53418	RUNX1	Kasumi-1	Myeloblast	Blood	0.188196	0.108663	0.18699	0.151809	0.561566
1869	74209	BRD2	SF8628	None	Pontine	0.166399	0.163218	0.130919	0.151847	0.561566
1870	51590	SRF	HUES64	Embryonic Stem Cell	Embryo	0.505572	0.0595862	0.345234	0.152157	0.561857
1871	70095	TET2	293T	None	None	0.182361	0.212285	0.103506	0.152245	0.561857
1872	35840	CTCF	NHEK	Keratinocyte	Skin	0.230084	0.223087	0.0894471	0.152318	0.561857
1873	8090	CTCF	NHEK	Keratinocyte	Skin	0.230084	0.223087	0.0894471	0.152318	0.561857
1874	68966	PR	T47D	None	Breast	0.161437	0.211999	0.112628	0.152403	0.561857
1875	76495	BRPF3	RKO	Epithelium	Colon	0.19543	0.127101	0.148194	0.152413	0.561857
1876	77160	ZNF211	293T	None	None	0.153419	0.148479	0.155847	0.152525	0.561967
1877	42351	STAG1	GM12892	Lymphoblastoid	Blood	0.21821	0.116086	0.152581	0.152709	0.561996
1878	55516	ATF4	HAP-1	None	None	0.127994	0.146466	0.198846	0.152935	0.561996
1879	67763	RUNX1	None	Hematopoietic stem and progenitor cell	Fetal Liver	0.152572	0.146946	0.159809	0.152943	0.561996
1880	56056	RAD21	MCF-7	Epithelium	Breast	0.30603	0.083814	0.2033	0.152971	0.561996
1881	45834	CTCF	None	Embryonic Fibroblast	Foreskin	0.392374	0.0681913	0.285022	0.153096	0.561996
1882	4943	RELA	GM18505	Lymphoblastoid	Blood	0.169389	0.126431	0.17207	0.153111	0.561996
1883	55664	PAF1	HCT-116	None	Colon	0.15758	0.157237	0.145154	0.153117	0.561996
1884	75570	SMC1A	None	None	None	0.203704	0.128824	0.143408	0.153183	0.561996
1885	65123	ZFP64	HEK293	Epithelium	Embryonic Kidney	0.176569	0.189471	0.11483	0.153267	0.562007
1886	39513	POU5F1	None	Fibroblast	None	0.15356	0.152824	0.154421	0.153599	0.562733
1887	46349	MAX	SK-N-SH	Neuroblastoma cell	Brain	0.184375	0.216965	0.103591	0.153643	0.562733
1888	45405	NCOR1	K562	Erythroblast	Bone Marrow	0.159619	0.145005	0.157261	0.153709	0.562733
1889	71251	BRD4	None	Osteoblast	None	0.152257	0.155542	0.15402	0.153929	0.563237
1890	56043	GABPA	HepG2	Epithelium	Liver	0.159126	0.149057	0.154359	0.154079	0.56349
1891	48296	REST	GM12878	B Lymphocyte	Blood	0.178877	0.128615	0.163338	0.15418	0.563561
1892	5569	POLR2M	HeLa	Epithelium	Cervix	0.156712	0.152346	0.154616	0.154539	0.564575
1893	46173	NANOG	H1	Embryonic Stem Cell	Embryo	0.133063	0.224724	0.13271	0.154629	0.564604
1894	46130	BCL3	GM12878	B Lymphocyte	Blood	0.131904	0.123439	0.257111	0.154726	0.564659
1895	69270	ERG	VCaP	Epithelium	Prostate	0.155998	0.152152	0.156838	0.154971	0.565256
1896	69873	AFF4	None	Th1	None	0.198171	0.120925	0.164936	0.155336	0.565561
1897	64486	FOSL2	A549	Epithelium	Lung	0.150633	0.155903	0.159752	0.155346	0.565561
1898	72553	ZNF143	U937	Monocyte	None	0.151719	0.151291	0.16365	0.155365	0.565561
1899	35846	CTCF	H1	Embryonic Stem Cell	Embryo	0.143814	0.309536	0.105572	0.155464	0.565561
1900	8086	CTCF	H1	Embryonic Stem Cell	Embryo	0.143814	0.309536	0.105572	0.155464	0.565561
1901	1308	PHF8	HeLa	Epithelium	Cervix	0.155251	0.143934	0.171106	0.156044	0.567203
1902	69774	JUND	HT29	colorectal adenocarcinoma	None	0.124893	0.176439	0.178894	0.156079	0.567203
1903	36766	ZNF143	HEK293T	Epithelium	Embryonic Kidney	0.157583	0.148045	0.163954	0.156274	0.567613
1904	74571	MAZ	T778	None	None	0.21344	0.150101	0.12676	0.156575	0.568214
1905	37391	GATA3	Jurkat E6-1	T Lymphocyte	Blood	0.144503	0.169164	0.158151	0.156673	0.568214
1906	47776	CTCF	None	Erythroid Progenitor Cell	Blood	0.207511	0.236044	0.0966339	0.156686	0.568214
1907	52090	TP53	IMR90	Fibroblast	Lung	0.168397	0.149983	0.153151	0.156811	0.56837
1908	1741	FOS	None	Endothelial Cell	Umbilical Vein	0.14645	0.185212	0.144884	0.156994	0.568588
1909	63077	FOSL1	K562	Erythroblast	Bone Marrow	0.151376	0.125087	0.217888	0.157036	0.568588
1910	45590	CTCF	GM12864	B Lymphocyte	Blood	0.235405	0.110564	0.169143	0.157505	0.569988
1911	33605	FAIRE	HepG2	Epithelium	Liver	0.145529	0.184056	0.148301	0.15765	0.570213
1912	64488	CTCF	None	None	Stomach	0.157413	0.158189	0.15793	0.157844	0.570614
1913	63097	SMAD5	GM12878	B Lymphocyte	Blood	0.182653	0.114183	0.205655	0.15797	0.570664
1914	43097	ETS1	CUTLL1	T Lymphocyte	Blood	0.218233	0.132922	0.143745	0.158022	0.570664
1915	63111	HNRNPLL	HepG2	Epithelium	Liver	0.160857	0.16036	0.15494	0.158677	0.572552
1916	63883	BCL3	A549	Epithelium	Lung	0.171431	0.182026	0.131489	0.158728	0.572552
1917	2398	STAG1	MCF-7	Epithelium	Breast	0.28032	0.0908394	0.212039	0.158794	0.572552
1918	55518	ATF4	HAP-1	None	None	0.121334	0.192175	0.182237	0.159028	0.573097
1919	49263	BMI1	293T-Rex	None	None	0.164539	0.156547	0.157205	0.159356	0.573981
1920	39736	CTCF	PrEC	Epithelium	Prostate	0.403517	0.0725967	0.275776	0.159656	0.574524
1921	63410	CBX5	GM12878	B Lymphocyte	Blood	0.220066	0.111098	0.185789	0.159673	0.574524
1922	56953	SPI1	RS4	B Lymphocyte	None	0.167224	0.139082	0.178203	0.159882	0.574821
1923	76419	MAML3	SK-N-SH	Neuroblastoma cell	Brain	0.161922	0.157119	0.160798	0.159922	0.574821
1924	51585	SOX2	HUES64	Embryonic Stem Cell	Embryo	0.160003	0.160392	0.159874	0.160089	0.575124
1925	76248	CTCF	MCF10CA1a	Epithelium	Breast	0.392011	0.0672045	0.371339	0.160258	0.575432
1926	49652	MED1	MCF-7	Epithelium	Breast	0.208373	0.156254	0.132275	0.16042	0.575682
1927	45817	MAFK	HepG2	Epithelium	Liver	0.20694	0.106567	0.215973	0.160666	0.575682
1928	65153	ZSCAN22	HEK293	Epithelium	Embryonic Kidney	0.198272	0.152126	0.141364	0.160803	0.575682
1929	71204	PIAS1	LNCaP	Epithelium	Prostate	0.261717	0.126155	0.141235	0.160853	0.575682
1930	45906	NFE2	K562	Erythroblast	Bone Marrow	0.175368	0.156858	0.152054	0.160875	0.575682
1931	48278	CEBPA	GM12878	B Lymphocyte	Blood	0.168174	0.147816	0.168305	0.160884	0.575682
1932	68970	ESR1	T47D	None	Breast	0.163659	0.169183	0.150917	0.160914	0.575682
1933	65106	ZNF384	HEK293	Epithelium	Embryonic Kidney	0.28688	0.0829182	0.271652	0.161026	0.575682
1934	45816	SMC3	HepG2	Epithelium	Liver	0.310562	0.0966754	0.182778	0.161078	0.575682
1935	68974	ESR1	T47D	None	Breast	0.158485	0.15949	0.166649	0.161468	0.576778
1936	564	VDR	GM10861	Lymphocyte	Blood	0.183592	0.147606	0.157444	0.161643	0.576821
1937	63480	CTCF	MM.1S	B Lymphoblast	Blood	0.437653	0.0707735	0.291685	0.161693	0.576821
1938	37175	MYC	H2171	Epithelium	Lung	0.228013	0.201349	0.106594	0.161751	0.576821
1939	395	RBPJ	CUTLL1	T Lymphocyte	Blood	0.186735	0.137728	0.168136	0.161835	0.576821
1940	56456	EHMT2	HEK293T	Epithelium	Embryonic Kidney	0.165156	0.14954	0.172591	0.161897	0.576821
1941	33904	BRD4	None	Plasma Cell	None	0.191294	0.14731	0.154284	0.162372	0.577577
1942	55783	CTCF	MCF-7	Epithelium	Breast	0.227066	0.131983	0.151868	0.162372	0.577577
1943	63294	ZNF335	HEK293	Epithelium	Embryonic Kidney	0.218886	0.221537	0.104252	0.162479	0.577577
1944	56904	ESR1	MCF-7	Epithelium	Breast	0.145442	0.146901	0.207318	0.162504	0.577577
1945	34466	PAX5	Namalwa	B Lymphocyte	None	0.19956	0.111691	0.215595	0.162527	0.577577
1946	50893	RELA	None	None	None	0.186357	0.159705	0.146589	0.16275	0.577987
1947	63433	ELK1	MCF-7	Epithelium	Breast	0.168355	0.159413	0.160938	0.162818	0.577987
1948	50163	TBP	K562	Erythroblast	Bone Marrow	0.177104	0.147025	0.167256	0.162893	0.577987
1949	62920	ZSCAN29	K562	Erythroblast	Bone Marrow	0.159944	0.131438	0.21659	0.162986	0.578017
1950	64634	SMARCA4	None	Neuron	None	0.145591	0.17176	0.175618	0.16328	0.578765
1951	33494	ESR1	None	Epithelium	Mammary Gland	0.207888	0.0991201	0.266379	0.163544	0.579236
1952	58490	CTCF	None	Embryonic Stem Cell	Embryo	0.343265	0.0764784	0.307093	0.163665	0.579236
1953	72913	HDAC2	None	Cardiomyocyte	None	0.159391	0.190834	0.146485	0.163751	0.579236
1954	39972	CTCF	GM12871	B Lymphocyte	Blood	0.202468	0.163162	0.137162	0.163789	0.579236
1955	47267	KDM5B	MCF-7	Epithelium	Breast	0.24903	0.17005	0.116536	0.163832	0.579236
1956	45682	MAX	H1	Embryonic Stem Cell	Embryo	0.175383	0.167675	0.150912	0.164064	0.579428
1957	64112	SMARCA4	K562	Erythroblast	Bone Marrow	0.205165	0.119884	0.193741	0.164114	0.579428
1958	48331	SNAI2	None	Keratinocyte	None	0.212148	0.102542	0.246015	0.164138	0.579428
1959	77059	ZNF695	293T	None	None	0.190871	0.140241	0.168833	0.164239	0.579428
1960	53254	FOXM1	HEK293	Epithelium	Embryonic Kidney	0.175542	0.176686	0.144796	0.164396	0.579428
1961	63808	HLF	HepG2	Epithelium	Liver	0.111632	0.315982	0.154752	0.164514	0.579428
1962	54611	TEAD1	SF268	None	None	0.215114	0.112036	0.207794	0.164523	0.579428
1963	46226	YY1	HepG2	Epithelium	Liver	0.189676	0.161419	0.147538	0.16459	0.579428
1964	44562	EMX1	293FT	None	Embryonic Kidney	0.169176	0.313164	0.105452	0.164641	0.579428
1965	45823	RFX5	HepG2	Epithelium	Liver	0.157876	0.194257	0.148504	0.164893	0.580021
1966	46275	RAD21	K562	Erythroblast	Bone Marrow	0.154836	0.135678	0.225862	0.165048	0.580021
1967	42521	CTCF	GM2588	Lymphoblastoid	Blood	0.205234	0.167252	0.135655	0.165061	0.580021
1968	55548	MEF2B	None	B Lymphocyte	None	0.170007	0.157847	0.168405	0.165257	0.580085
1969	50989	CTCF	H1	Embryonic Stem Cell	Embryo	0.386435	0.090112	0.193345	0.165277	0.580085
1970	72628	ETS1	None	Endothelial Cell	Umbilical Vein	0.159971	0.177011	0.160033	0.165331	0.580085
1971	68310	NR4A1	Kasumi-1	Acute myeloid leukemia	None	0.22127	0.095435	0.283841	0.165485	0.580332
1972	36098	ESR1	None	Epithelium	Mammary Gland	0.16785	0.16076	0.168653	0.165684	0.5805
1973	39785	RUNX1	Kasumi-1	Myeloblast	Blood	0.164315	0.16704	0.165999	0.165778	0.5805
1974	42256	CTCF	GM10847	Lymphoblastoid	Blood	0.36555	0.0787019	0.281693	0.165785	0.5805
1975	63264	PTTG1	K562	Erythroblast	Bone Marrow	0.168242	0.163197	0.167091	0.166151	0.581206
1976	76931	CD74	None	B Lymphocyte	None	0.167213	0.1608	0.171095	0.16627	0.581206
1977	72855	TRAF7	None	None	meningioma	0.177184	0.16193	0.160864	0.166366	0.581206
1978	69881	CDK9	None	Th1	None	0.175706	0.154138	0.170785	0.166398	0.581206
1979	666	MYC	GM12878	B Lymphocyte	Blood	0.17874	0.168266	0.15446	0.166613	0.581206
1980	50100	AR	LNCaP	Epithelium	Prostate	0.183801	0.129859	0.204161	0.166888	0.581206
1981	42269	STAG1	GM10847	Lymphoblastoid	Blood	0.400952	0.0717596	0.351527	0.16695	0.581206
1982	76249	CTCF	None	Epithelium	Breast	0.327972	0.0794739	0.314104	0.167027	0.581206
1983	62871	ZBTB11	MCF-7	Epithelium	Breast	0.167643	0.158691	0.175952	0.167159	0.581206
1984	73547	BRD4	SUM159PT	mammary carcinoma cell line	Breast	0.206032	0.122867	0.198097	0.167163	0.581206
1985	54663	TCF4	HCT-116	None	Colon	0.160187	0.169703	0.172108	0.167187	0.581206
1986	73711	AFF1	SEM	B Lymphocyte	None	0.169228	0.163911	0.168574	0.167207	0.581206
1987	74353	OTX2	D-341	None	None	0.130842	0.196886	0.189737	0.167273	0.581206
1988	565	VDR	GM10861	Lymphocyte	Blood	0.178791	0.152958	0.17264	0.16745	0.581206
1989	45600	CTCF	GM12873	B Lymphocyte	Blood	0.319996	0.0960451	0.206597	0.167479	0.581206
1990	62532	ZNF585B	HEK293	Epithelium	Embryonic Kidney	0.183333	0.144455	0.180016	0.167481	0.581206
1991	63956	ZNF197	K562	Erythroblast	Bone Marrow	0.188338	0.122421	0.220342	0.167499	0.581206
1992	58879	RAD21	TF-1	Erythroblast	Bone Marrow	0.177831	0.133433	0.206256	0.1675	0.581206
1993	72498	ESR1	None	None	Breast	0.165769	0.159703	0.178254	0.167592	0.581234
1994	33518	FOXA1	MCF-7	Epithelium	Breast	0.183419	0.148091	0.176218	0.167928	0.582104
1995	52784	CIITA	Raji	B Lymphocyte	Blood	0.167723	0.165215	0.171285	0.168041	0.582205
1996	36650	CTCF	None	Myoblast	Skeletal Muscle	0.316188	0.0950702	0.216931	0.168375	0.582664
1997	42714	ETV5	LoVo	None	Colon	0.194203	0.133958	0.190451	0.168394	0.582664
1998	74664	NRF1	K562	Erythroblast	Bone Marrow	0.215415	0.13767	0.167676	0.168426	0.582664
[truncated: 4,914 more rows]

## Sheet: Genes Rhythmic MESOR Decrease
LISA_Genes rhythmic (weighted BIC - 0.75) in young and old with mesor decreased (q - 0.05)
Rank	sample_id	factor	cell_line	cell_type	tissue	DNase_p_value	ChIP-seq_p_value	H3K27ac_p_value	summary_p_value	q_value
1	49480	E2F4	None	Retinal pigment cell	None	8.96035e-49	1.7031e-49	6.85689e-50	1.39072e-49	9.61267e-46
2	67459	E2F1	None	Mesenchymal Stem Cell	Umbilical Cord	9.58415e-44	8.81366e-45	7.21976e-44	2.17794e-44	7.52695e-41
3	70860	E2F1	hTERT-RPE1	Epithelium	None	3.6437e-42	4.6474e-44	6.18899e-44	7.90522e-44	1.82136e-40
4	67454	E2F1	None	Mesenchymal Stem Cell	Umbilical Cord	6.87057e-41	2.64893e-43	2.43579e-42	7.1425e-43	1.23422e-39
5	3225	E2F4	None	Adipocyte	Adipose	8.23658e-41	7.25653e-42	2.87651e-42	6.02905e-42	8.33455e-39
6	67457	E2F1	None	Mesenchymal Stem Cell	Umbilical Cord	2.76284e-40	2.51376e-41	1.80683e-41	3.0381e-41	3.49989e-38
7	70857	E2F1	U2OS	osteosarcoma	None	1.00113e-40	1.4827e-40	1.60677e-40	1.3068e-40	1.29037e-37
8	36812	E2F4	MCF-7	Epithelium	Breast	1.28213e-37	2.20894e-37	2.36571e-37	1.81229e-37	1.56582e-34
9	67455	E2F1	None	Mesenchymal Stem Cell	Umbilical Cord	4.71662e-34	4.87174e-36	2.52556e-35	1.21467e-35	9.32865e-33
10	45752	E2F4	HeLa-S3	Epithelium	Cervix	3.93679e-31	1.01646e-35	1.32468e-34	2.832e-35	1.95748e-32
11	67458	E2F1	None	Mesenchymal Stem Cell	Umbilical Cord	1.07961e-30	3.41603e-33	2.87947e-32	9.1354e-33	5.74035e-30
12	36807	E2F4	MCF-7	Epithelium	Breast	5.38294e-31	1.07981e-31	1.89004e-32	4.68549e-32	2.69884e-29
13	70962	E2F1	Raji	B Lymphocyte	Blood	1.09656e-29	3.94957e-31	3.52356e-30	1.03202e-30	5.48717e-28
14	77535	TFDP1	MM1.S	B Lymphocyte	Blood	4.51808e-29	2.93069e-30	3.27456e-30	4.48609e-30	2.21485e-27
15	44332	E2F1	LNCaP	Epithelium	Prostate	2.44849e-29	2.08678e-28	2.70172e-30	7.21556e-30	3.32493e-27
16	67456	E2F1	None	Mesenchymal Stem Cell	Umbilical Cord	1.09992e-27	7.18766e-30	4.60355e-29	1.85461e-29	8.01192e-27
17	41481	E2F1	OCI-Ly1	B cell lymphoma	Bone Marrow	8.44994e-26	5.95956e-28	4.69597e-28	7.85485e-28	3.19369e-25
18	1880	RBL2	IMR90	Fibroblast	Lung	1.02069e-27	2.2306e-27	1.68358e-26	2.0169e-27	7.74489e-25
19	1212	E2F1	HeLa	Epithelium	Cervix	6.41211e-26	1.39784e-27	1.00506e-26	3.61236e-27	1.31414e-24
20	44333	E2F1	LNCaP	Epithelium	Prostate	2.05335e-26	1.24168e-25	1.39075e-27	3.86702e-27	1.33644e-24
21	70755	MYC	LNCaP	None	LNCaP cells	1.51463e-20	1.37796e-27	4.66968e-20	4.13388e-27	1.36064e-24
22	77534	TFDP1	U266B1	None	None	3.05803e-27	3.81692e-26	7.56624e-27	6.18082e-27	1.9419e-24
23	45754	E2F1	HeLa-S3	Epithelium	Cervix	6.39746e-26	1.73716e-25	2.57997e-27	7.33517e-27	2.20438e-24
24	45617	E2F4	GM12878	B Lymphocyte	Blood	2.87591e-26	8.81228e-27	2.27366e-26	1.56062e-26	4.49458e-24
25	45776	E2F6	HeLa-S3	Epithelium	Cervix	3.53901e-25	7.44216e-27	3.9385e-26	1.84518e-26	5.10156e-24
26	62550	TFDP1	K562	Erythroblast	Bone Marrow	1.70097e-25	4.84371e-25	7.72605e-27	2.18379e-26	5.80552e-24
27	62551	TFDP1	K562	Erythroblast	Bone Marrow	6.67428e-25	4.77751e-24	1.22924e-26	3.6119e-26	9.24646e-24
28	70756	MYC	LNCaP	None	LNCaP cells	7.0496e-20	1.38084e-26	3.88253e-19	4.14253e-26	1.02261e-23
29	51750	FOXP1	LNCaP	Epithelium	Prostate	2.85311e-23	2.68917e-26	6.78569e-23	8.05674e-26	1.92028e-23
30	75924	E2F1	MM1.S	Multiple myeloma cell	None	1.14307e-23	7.55502e-26	1.01551e-25	1.29472e-25	2.98304e-23
31	2282	E2F1	MCF-7	Epithelium	Breast	1.98149e-24	6.40637e-24	4.86178e-26	1.41314e-25	3.15084e-23
32	45866	MXI1	IMR90	Fibroblast	Lung	1.6661e-25	4.20332e-22	1.09026e-25	1.97674e-25	4.26975e-23
33	8657	HDAC1	VCaP	Epithelium	Prostate	2.31473e-25	1.30057e-24	3.68417e-25	3.8445e-25	8.05247e-23
34	1870	RB1	IMR90	Fibroblast	Lung	9.18736e-24	5.1868e-25	1.16003e-24	1.03489e-24	2.10387e-22
35	63739	E2F4	MCF-7	Epithelium	Breast	1.46321e-24	3.15421e-24	2.17412e-24	2.0542e-24	4.05676e-22
36	36356	POLR2B	IMR90	Fibroblast	Lung	1.25577e-23	1.1801e-24	2.10604e-24	2.14004e-24	4.10887e-22
37	44336	E2F1	LNCaP	Epithelium	Prostate	7.96829e-23	1.6767e-22	7.62987e-25	2.25708e-24	4.21646e-22
38	1874	RBL2	IMR90	Fibroblast	Lung	1.23396e-22	9.57029e-25	1.51171e-23	2.6806e-24	4.87586e-22
39	44339	E2F1	LNCaP	Epithelium	Prostate	9.72705e-23	4.74018e-23	2.91392e-24	8.00945e-24	1.41952e-21
40	49416	RB1	IMR90	Fibroblast	Lung	1.71395e-22	5.95835e-24	5.35821e-24	8.3265e-24	1.43882e-21
41	56961	GTF2B	HeLa	Epithelium	Cervix	1.56769e-22	1.94339e-23	7.39317e-24	1.55364e-23	2.61921e-21
42	38731	TFDP1	LoVo	None	Colon	4.26606e-23	1.19199e-23	1.50649e-23	1.72698e-23	2.84211e-21
43	56252	E2F1	None	Epithelium	Mammary Gland	1.01664e-21	5.29949e-22	9.72729e-24	2.83891e-23	4.56339e-21
44	44317	E2F1	LNCaP	Epithelium	Prostate	5.91732e-22	1.89299e-19	1.26118e-23	3.70435e-23	5.8192e-21
45	32889	FOXM1	U2OS	None	Bone	2.34296e-23	8.26022e-23	8.64546e-23	4.5212e-23	6.94456e-21
46	1872	RB1	IMR90	Fibroblast	Lung	4.78645e-23	1.22466e-22	8.29253e-23	7.29627e-23	1.09634e-20
47	45750	E2F1	HeLa-S3	Epithelium	Cervix	5.12827e-21	8.55914e-21	2.80363e-23	8.33801e-23	1.22622e-20
48	70953	E2F1	Raji	B Lymphocyte	Blood	3.9529e-22	4.30528e-23	1.22276e-22	8.84036e-23	1.27301e-20
49	44337	E2F1	LNCaP	Epithelium	Prostate	9.7033e-21	1.64099e-19	3.55754e-23	1.06313e-22	1.49967e-20
50	93	PHF8	HEK293T	Epithelium	Embryonic Kidney	1.4912e-21	6.50963e-23	1.99154e-22	1.42493e-22	1.9331e-20
51	1878	RBL2	IMR90	Fibroblast	Lung	1.50596e-21	6.16433e-23	2.41164e-22	1.42633e-22	1.9331e-20
52	68822	HDAC1	None	Erythroid progenitor	Bone Marrow	1.37609e-22	9.51208e-22	2.62054e-22	2.47234e-22	3.28631e-20
53	44325	E2F1	LNCaP	Epithelium	Prostate	9.83553e-21	1.25417e-19	9.23083e-23	2.7415e-22	3.57533e-20
54	70753	MYC	LNCaP	None	LNCaP cells	3.48411e-16	1.05312e-22	1.15775e-15	3.15936e-22	4.04399e-20
55	34997	FOXM1	MDA-MB-231	Epithelium	Breast	3.99876e-20	1.59723e-20	1.72593e-22	5.10067e-22	6.41014e-20
56	45951	E2F4	K562	Erythroblast	Bone Marrow	1.34937e-19	6.88881e-19	2.02039e-22	6.05034e-22	7.46785e-20
57	2090	MYC	K562	Erythroblast	Bone Marrow	1.01052e-19	2.70747e-16	2.14694e-22	6.42717e-22	7.65941e-20
58	45870	MYC	K562	Erythroblast	Bone Marrow	1.01052e-19	2.70747e-16	2.14694e-22	6.42717e-22	7.65941e-20
59	44316	E2F1	LNCaP	Epithelium	Prostate	2.14236e-20	9.86563e-19	2.40702e-22	7.1391e-22	8.36363e-20
60	9216	POLR2B	HeLa	Epithelium	Cervix	3.56337e-21	4.42656e-22	8.08851e-22	7.94481e-22	9.15243e-20
61	45991	E2F1	MCF-7	Epithelium	Breast	1.6175e-20	1.33963e-15	2.81514e-22	8.30096e-22	9.40594e-20
62	46329	SIN3A	PANC-1	None	Pancreas	2.09295e-20	1.91089e-21	3.53817e-22	8.83023e-22	9.84428e-20
63	55465	NELFA	HeLa	Epithelium	Cervix	3.83159e-21	5.84033e-22	9.52154e-22	9.92237e-22	1.08863e-19
64	44320	E2F1	LNCaP	Epithelium	Prostate	7.89822e-20	2.1661e-17	3.5587e-22	1.0628e-21	1.14783e-19
65	49977	BRD4	90-8TL	Schwann Cell	Brain	5.30921e-19	4.51451e-22	9.85431e-19	1.35258e-21	1.43832e-19
66	45745	MYC	HeLa-S3	Epithelium	Cervix	1.18596e-18	1.19215e-15	4.93271e-22	1.4792e-21	1.54912e-19
67	46221	TAF1	HeLa-S3	Epithelium	Cervix	1.3922e-20	2.09971e-19	5.94644e-22	1.70622e-21	1.76021e-19
68	50876	SPI1	None	None	None	6.01932e-21	3.22865e-21	8.62504e-22	1.83456e-21	1.86477e-19
69	2684	PHF8	SH-SY5Y	None	Bone Marrow	4.28914e-20	1.71178e-21	1.97383e-21	2.69268e-21	2.69736e-19
70	69874	RELA	None	Th1	None	6.41228e-19	2.03842e-20	1.00833e-21	2.87809e-21	2.84191e-19
71	41572	ING2	RKO	Epithelium	Colon	8.58101e-21	2.52563e-20	1.38612e-21	3.41853e-21	3.32801e-19
72	70752	MYC	LNCaP	None	LNCaP cells	2.80321e-15	1.97481e-21	1.4236e-14	5.92443e-21	5.68745e-19
73	49417	RB1	IMR90	Fibroblast	Lung	6.59566e-20	2.93088e-21	7.52951e-21	6.13288e-21	5.80691e-19
74	40016	MED1	MM1.S	B Lymphocyte	Blood	4.43937e-19	5.91301e-19	2.18897e-21	6.5107e-21	6.07582e-19
75	43742	BRD4	KOPT-K1	T Lymphocyte	Blood	3.13936e-20	4.13265e-19	2.37656e-21	6.59269e-21	6.07582e-19
76	42899	RELA	AC16	Cardiomyocyte	None	5.46983e-21	8.27809e-21	9.02761e-21	7.2395e-21	6.58414e-19
77	69870	BRD4	None	Th1	None	7.86624e-19	2.14078e-18	2.95156e-21	8.80947e-21	7.90793e-19
78	49852	WDR5	SK-N-MC	None	Brain	1.83504e-20	1.3579e-20	6.57308e-21	1.07038e-20	9.48524e-19
79	46077	TAF1	A549	Epithelium	Lung	1.27178e-19	7.13831e-21	1.13981e-20	1.27288e-20	1.11369e-18
80	8658	HDAC1	VCaP	Epithelium	Prostate	1.28108e-20	1.63239e-20	1.0965e-20	1.30141e-20	1.12442e-18
81	45885	MYC	K562	Erythroblast	Bone Marrow	1.2649e-16	5.51493e-13	4.54999e-21	1.36495e-20	1.16476e-18
82	43081	CDK9	HEK293T	Epithelium	Embryonic Kidney	3.7262e-20	1.49707e-18	5.87223e-21	1.5167e-20	1.27847e-18
83	46349	MAX	SK-N-SH	Neuroblastoma cell	Brain	5.62123e-19	2.26724e-13	5.927e-21	1.75955e-20	1.4653e-18
84	46106	TAF1	ECC-1	Epithelium	Endometrium	4.25958e-20	8.41792e-20	8.82806e-21	2.01842e-20	1.66087e-18
85	44324	E2F1	LNCaP	Epithelium	Prostate	8.11924e-19	1.68374e-17	6.94578e-21	2.06522e-20	1.67938e-18
86	50879	SPI1	None	None	None	3.62133e-19	1.01498e-16	8.52155e-21	2.49749e-20	2.00728e-18
87	36230	TTF2	HEK293	Epithelium	Embryonic Kidney	5.81487e-20	1.33016e-17	1.07843e-20	2.72727e-20	2.16677e-18
88	46345	TAF1	SK-N-SH	Neuroblastoma cell	Brain	2.50554e-19	6.18041e-20	1.46053e-20	3.38449e-20	2.63334e-18
89	71934	MYC	U2OS	None	Bone	8.26463e-19	6.55626e-20	1.38862e-20	3.39073e-20	2.63334e-18
90	73716	KMT2A	SEM	B Lymphocyte	None	7.57312e-20	1.0874e-19	1.59901e-20	3.53192e-20	2.71251e-18
91	8789	PHF8	K562	Erythroblast	Bone Marrow	6.30014e-19	1.34952e-16	1.21989e-20	3.58983e-20	2.72669e-18
92	39017	MED1	MM1.S	B Lymphocyte	Blood	4.64282e-17	6.24672e-14	1.59511e-20	4.78368e-20	3.594e-18
93	46282	TAF1	K562	Erythroblast	Bone Marrow	1.31737e-18	4.61846e-17	1.81913e-20	5.38097e-20	3.99928e-18
94	46277	SIN3A	K562	Erythroblast	Bone Marrow	2.94265e-19	7.8541e-19	2.02423e-20	5.54805e-20	4.07959e-18
95	38193	MYC	MCF-7	Epithelium	Breast	9.46614e-19	7.82917e-11	1.97174e-20	5.79453e-20	4.21598e-18
96	50877	SPI1	None	None	None	1.29155e-19	2.09634e-19	2.67947e-20	6.02003e-20	4.30087e-18
97	74838	JMJD6	None	3565 cells	None	6.1256e-20	1.14843e-19	4.05316e-20	6.03566e-20	4.30087e-18
98	68632	KMT2D	None	patient derived xenograft cells	None	9.216e-17	2.13878e-20	2.43945e-18	6.35911e-20	4.48512e-18
99	46071	E2F6	A549	Epithelium	Lung	2.63744e-19	3.17582e-17	2.50334e-20	6.85406e-20	4.78538e-18
100	53300	RARA	TSU-1621-MT	None	None	1.1936e-18	1.59228e-14	2.57859e-20	7.57219e-20	5.2339e-18
101	40233	MED1	None	B Lymphocyte	Blood	1.60982e-16	9.52574e-15	2.90421e-20	8.71104e-20	5.96146e-18
102	1309	PHF8	HeLa	Epithelium	Cervix	2.31632e-18	4.03555e-20	1.2663e-19	9.06112e-20	6.14024e-18
103	53347	CDK9	HeLa	Epithelium	Cervix	2.17648e-19	9.62607e-19	3.85612e-20	9.50382e-20	6.37771e-18
104	8800	SAP30	K562	Erythroblast	Bone Marrow	2.46149e-19	1.52529e-18	3.95795e-20	1.00054e-19	6.64975e-18
105	38119	MAX	HeLa	Epithelium	Cervix	7.0721e-18	2.71692e-13	3.47642e-20	1.03783e-19	6.76741e-18
106	45749	MAX	HeLa-S3	Epithelium	Cervix	7.0721e-18	2.71692e-13	3.47642e-20	1.03783e-19	6.76741e-18
107	33888	CDK9	None	Plasma Cell	None	5.61588e-19	5.42469e-18	4.18095e-20	1.15906e-19	7.48731e-18
108	46153	YY1	GM12891	Lymphoblastoid	Blood	3.09151e-17	3.7114e-17	4.23156e-20	1.26629e-19	8.10426e-18
109	50878	SPI1	None	None	None	1.14577e-18	2.15862e-17	4.51186e-20	1.29966e-19	8.20988e-18
110	46360	SIN3A	SK-N-SH	Neuroblastoma cell	Brain	5.24196e-19	7.37224e-19	5.07688e-20	1.30655e-19	8.20988e-18
111	72913	HDAC2	None	Cardiomyocyte	None	9.38693e-20	1.53014e-18	8.92186e-20	1.33244e-19	8.27297e-18
112	45778	MAX	HeLa-S3	Epithelium	Cervix	5.12096e-18	1.03738e-14	4.50778e-20	1.34053e-19	8.27297e-18
113	1314	PHF8	HeLa	Epithelium	Cervix	1.74802e-18	1.71759e-18	5.69527e-20	1.60319e-19	9.8064e-18
114	45791	TBP	HepG2	Epithelium	Liver	6.04552e-19	5.28638e-17	6.31255e-20	1.71287e-19	1.03854e-17
115	38585	TAF3	None	Epithelium	Colon	1.69971e-18	2.58796e-16	6.06739e-20	1.75708e-19	1.05608e-17
116	46000	E2F4	MCF-10A	Epithelium	Breast	3.9635e-18	2.65036e-16	7.42191e-20	2.18504e-19	1.30198e-17
117	33904	BRD4	None	Plasma Cell	None	4.90104e-18	5.34281e-18	7.629e-20	2.22237e-19	1.31291e-17
118	43109	BRD4	CUTLL1	T Lymphocyte	Blood	1.34279e-18	1.33079e-15	8.87606e-20	2.49756e-19	1.46298e-17
119	70964	MYC	Raji	B Lymphocyte	Blood	4.09423e-19	2.16266e-19	2.12886e-19	2.55021e-19	1.47073e-17
120	33124	MED1	MM1.S	B Lymphocyte	Blood	4.90793e-17	6.53927e-16	8.52706e-20	2.55335e-19	1.47073e-17
121	45849	MAX	None	Endothelial Cell	Umbilical Vein	1.34758e-17	2.49965e-14	9.35321e-20	2.78661e-19	1.59182e-17
122	2280	E2F1	MCF-7	Epithelium	Breast	2.18836e-17	7.54282e-14	9.40883e-20	2.81056e-19	1.59234e-17
123	38115	MYC	HeLa	Epithelium	Cervix	2.72029e-17	7.68003e-16	9.68086e-20	2.8936e-19	1.62261e-17
124	43110	MED1	CUTLL1	T Lymphocyte	Blood	5.96956e-18	4.26121e-18	1.00972e-19	2.91094e-19	1.62261e-17
125	40227	CDK9	None	B Lymphocyte	Blood	2.1402e-17	2.52914e-17	9.87296e-20	2.93688e-19	1.62397e-17
126	72405	PARP1	MCF-7	Human Breast Cancer Cell	Breast	3.1939e-18	1.17258e-17	1.06507e-19	3.06515e-19	1.67202e-17
127	72407	PARP1	MCF-7	Human Breast Cancer Cell	Breast	1.27605e-18	7.29455e-19	1.31395e-19	3.07214e-19	1.67202e-17
128	45857	MYC	None	Endothelial Cell	Umbilical Vein	4.19348e-18	2.6781e-16	1.09518e-19	3.20065e-19	1.71495e-17
129	8112	MYC	None	Endothelial Cell	Umbilical Vein	4.19348e-18	2.6781e-16	1.09518e-19	3.20065e-19	1.71495e-17
130	33174	MYC	U87	None	Brain	7.70852e-18	8.538e-19	1.25427e-19	3.23495e-19	1.72e-17
131	49266	SCML2	293T-Rex	None	None	2.08635e-16	1.16381e-19	2.88458e-17	3.47546e-19	1.83377e-17
132	41574	BRD1	RKO	Epithelium	Colon	1.51421e-19	7.39031e-18	8.74015e-19	3.80539e-19	1.99264e-17
133	70759	OGT	HEK293	HEK 293 Cell Line	None	2.04247e-17	1.96034e-14	1.33271e-19	3.97218e-19	2.06434e-17
134	45774	MXI1	HeLa-S3	Epithelium	Cervix	2.34769e-18	1.38729e-18	1.64566e-19	4.15319e-19	2.1423e-17
135	48824	MBD2	MCF-7	Epithelium	Breast	4.78472e-18	4.1641e-17	1.50144e-19	4.35206e-19	2.22826e-17
136	39460	FOXM1	MDA-MB-231	Epithelium	Breast	7.25745e-18	2.13322e-19	5.01029e-19	4.3979e-19	2.23517e-17
137	72612	SP1	A375	Melanoma Cell	None	3.53079e-18	9.6172e-19	1.89826e-19	4.55166e-19	2.29643e-17
138	45419	SAP30	K562	Erythroblast	Bone Marrow	1.7265e-18	7.42903e-18	1.7556e-19	4.68027e-19	2.34421e-17
139	51864	HSF1	451Lu	Melanoma Cell	None	3.68571e-18	1.96807e-14	1.79033e-19	5.12214e-19	2.54706e-17
140	64865	ZFX	K562	Erythroblast	Bone Marrow	1.43996e-18	9.14107e-19	2.61818e-19	5.34962e-19	2.64118e-17
141	76682	ASXL1	HEK293	None	None	9.1604e-18	2.25269e-14	1.91854e-19	5.63751e-19	2.76358e-17
142	45920	HMGN3	K562	Erythroblast	Bone Marrow	3.59528e-17	1.01083e-13	2.15485e-19	6.42601e-19	3.12793e-17
143	70561	MYC	U2OS	None	Bone	3.02676e-18	2.40308e-11	2.42921e-19	6.74619e-19	3.26082e-17
144	42725	IRF1	LoVo	None	Colon	1.01738e-18	1.31468e-15	3.16853e-19	7.24692e-19	3.47852e-17
145	56353	CDK8	MOLM-14	Myeloid Cell	None	9.44027e-18	1.13952e-18	4.07812e-19	8.7321e-19	4.1625e-17
146	45239	PHF8	H1	Embryonic Stem Cell	Embryo	1.21874e-18	1.02885e-15	3.91518e-19	8.88729e-19	4.17884e-17
147	8818	PHF8	H1	Embryonic Stem Cell	Embryo	1.21874e-18	1.02885e-15	3.91518e-19	8.88729e-19	4.17884e-17
148	40022	BRD4	None	B Lymphocyte	Blood	6.54623e-18	1.25699e-18	4.20023e-19	9.01136e-19	4.20855e-17
149	69616	MYC	Jurkat	T Lymphocyte	Blood	7.37571e-18	3.42034e-16	3.18581e-19	9.15354e-19	4.24626e-17
150	2283	E2F1	MCF-7	Epithelium	Breast	4.81132e-17	7.90691e-13	3.33354e-19	9.9318e-19	4.57657e-17
151	37623	MYH11	ME-1	Leukemia Cell	None	2.13056e-17	3.70407e-19	3.63258e-17	1.08139e-18	4.95007e-17
152	58506	WDR5	BE2-C	Neuroblast	Brain	1.34915e-18	3.69129e-14	6.0239e-19	1.24933e-18	5.68116e-17
153	36226	DCP1A	HEK293	Epithelium	Embryonic Kidney	3.81591e-18	3.09958e-18	5.8469e-19	1.30719e-18	5.90544e-17
154	45428	HDAC1	K562	Erythroblast	Bone Marrow	1.16956e-18	3.55721e-17	7.94696e-19	1.4009e-18	6.28767e-17
155	34318	MYC	HEK293T	Epithelium	Embryonic Kidney	4.51605e-18	5.75844e-16	5.30231e-19	1.42238e-18	6.34291e-17
156	8775	HDAC1	K562	Erythroblast	Bone Marrow	4.8049e-18	2.59307e-15	5.44767e-19	1.4676e-18	6.50261e-17
157	45928	MYC	K562	Erythroblast	Bone Marrow	8.87376e-17	2.29995e-13	5.02704e-19	1.49961e-18	6.60211e-17
158	53324	NELFE	HeLa	Epithelium	Cervix	6.81092e-18	5.88712e-18	6.07162e-19	1.52773e-18	6.68336e-17
159	49877	WDR5	A673	Polygonal	Muscle	1.28044e-17	3.85805e-18	6.26679e-19	1.55198e-18	6.74674e-17
160	45881	TBP	K562	Erythroblast	Bone Marrow	3.76914e-17	4.21359e-14	5.50933e-19	1.62897e-18	7.03713e-17
161	46334	TAF1	PFSK-1	Neuron	Brain	4.23718e-18	5.79369e-18	7.19763e-19	1.66856e-18	7.16342e-17
162	46377	REST	U87	None	Brain	7.85849e-17	1.44771e-12	5.91097e-19	1.76005e-18	7.50955e-17
163	44312	E2F1	LNCaP	Epithelium	Prostate	6.49184e-17	6.02796e-15	6.40222e-19	1.90171e-18	8.06419e-17
164	40234	MED1	None	B Lymphocyte	Blood	2.53059e-16	3.01813e-16	6.65408e-19	1.98662e-18	8.37288e-17
165	46303	YY1	K562	Erythroblast	Bone Marrow	2.25566e-15	2.74522e-10	7.32418e-19	2.19655e-18	9.20154e-17
166	34396	MECP2	IMR90	Fibroblast	Lung	3.33861e-17	8.93694e-16	8.0142e-19	2.34585e-18	9.76776e-17
167	33191	MAX	MM1.S	B Lymphocyte	Blood	5.169e-18	9.80771e-18	1.07357e-18	2.44521e-18	1.01205e-16
168	46162	TAF1	GM12892	Lymphoblastoid	Blood	2.51212e-16	4.69721e-18	1.13684e-18	2.73597e-18	1.12566e-16
169	7527	HEY1	K562	Erythroblast	Bone Marrow	3.54166e-17	1.55356e-15	9.55153e-19	2.78856e-18	1.14051e-16
170	69813	NELFE	MCF-7	Human Breast Cancer Cell	Breast	1.11304e-16	1.22614e-18	4.09079e-18	2.80634e-18	1.14103e-16
171	45411	PHF8	K562	Erythroblast	Bone Marrow	4.74204e-17	1.1883e-13	9.6097e-19	2.82562e-18	1.14215e-16
172	58842	XRN2	HEK293	Epithelium	Embryonic Kidney	2.36348e-18	8.74782e-17	1.81194e-18	3.04127e-18	1.22217e-16
173	48825	MBD2	MCF-7	Epithelium	Breast	9.40171e-17	7.42382e-16	1.05045e-18	3.11217e-18	1.24343e-16
174	46208	SIN3A	HCT-116	None	Colon	9.16142e-16	6.0381e-14	1.12466e-18	3.36977e-18	1.33861e-16
175	46160	PAX5	GM12892	Lymphoblastoid	Blood	2.37648e-16	2.90469e-14	1.14313e-18	3.41285e-18	1.34649e-16
176	52436	WDR5	HEK293	Epithelium	Embryonic Kidney	6.04166e-18	1.20816e-14	1.40964e-18	3.42857e-18	1.34649e-16
177	2278	E2F1	MCF-7	Epithelium	Breast	6.10026e-16	9.1541e-12	1.24415e-18	3.72486e-18	1.45182e-16
178	43066	BRD4	HEK293T	Epithelium	Embryonic Kidney	5.59695e-17	1.6805e-18	5.27775e-18	3.73876e-18	1.45182e-16
179	8795	RBBP5	K562	Erythroblast	Bone Marrow	8.40878e-18	1.1317e-16	1.76331e-18	4.31732e-18	1.66542e-16
180	48755	CBX8	PC-3	Epithelium	Prostate	2.98861e-16	2.07566e-15	1.45373e-18	4.33704e-18	1.66542e-16
181	70809	MYC	HCT-116	Colon cancer cell	Colon	2.41717e-17	6.39404e-17	1.73653e-18	4.74029e-18	1.81022e-16
182	55468	NELFA	HeLa	Epithelium	Cervix	3.33608e-16	4.84045e-18	2.48577e-18	4.90293e-18	1.86088e-16
183	69872	AFF4	None	Th1	None	4.56711e-17	1.92631e-17	1.8688e-18	4.92682e-18	1.86088e-16
184	45895	CCNT2	K562	Erythroblast	Bone Marrow	5.66131e-16	2.19769e-12	1.67971e-18	5.02423e-18	1.88736e-16
185	45764	CHD2	HeLa-S3	Epithelium	Cervix	2.53917e-16	3.0349e-14	1.73333e-18	5.16445e-18	1.92104e-16
186	37169	MYC	MM1.S	B Lymphocyte	Blood	2.46497e-16	1.16242e-13	1.73531e-18	5.16946e-18	1.92104e-16
187	47551	MYC	P493-6	B cell lymphoma	None	4.42018e-17	1.64355e-15	1.83142e-18	5.27026e-18	1.94802e-16
188	46365	USF1	SK-N-SH_RA	Neuron	Brain	1.68856e-16	4.38308e-14	1.85389e-18	5.50104e-18	2.01559e-16
189	45390	KDM5B	K562	Erythroblast	Bone Marrow	5.86252e-18	8.56378e-17	2.76185e-18	5.51138e-18	2.01559e-16
190	68490	KAT5	K562	Lymphoblast	None	4.12176e-17	3.67394e-18	4.55094e-18	5.81188e-18	2.1143e-16
191	33123	CDK9	MM1.S	B Lymphocyte	Blood	2.89128e-16	3.92734e-15	1.99898e-18	5.95278e-18	2.15422e-16
192	48827	MBD2	MCF-7	Epithelium	Breast	8.12497e-17	5.67884e-15	2.07422e-18	6.0656e-18	2.18362e-16
193	8791	KDM5B	K562	Erythroblast	Bone Marrow	7.62825e-17	1.02596e-14	2.29437e-18	6.68067e-18	2.39106e-16
194	38289	MAX	H128	Epithelium	Lung	6.45962e-17	1.23074e-09	2.31725e-18	6.71101e-18	2.39106e-16
195	45553	MAX	A549	Epithelium	Lung	3.69212e-17	4.00235e-16	2.57021e-18	7.16577e-18	2.53999e-16
196	8790	PHF8	K562	Erythroblast	Bone Marrow	5.87827e-17	1.42006e-13	2.55541e-18	7.34672e-18	2.59084e-16
197	68456	USF1	None	Erythroid Cell	None	1.39489e-15	3.11604e-11	2.5408e-18	7.60892e-18	2.66969e-16
198	7341	HEY1	HepG2	Epithelium	Liver	9.42448e-17	2.49289e-13	2.80888e-18	8.18267e-18	2.85649e-16
199	70955	MYC	Raji	B Lymphocyte	Blood	1.22237e-17	5.50603e-18	1.18438e-17	8.62416e-18	2.99549e-16
200	69873	AFF4	None	Th1	None	3.91628e-16	6.23167e-18	5.76927e-18	8.91912e-18	3.08245e-16
201	53346	CDK9	HeLa	Epithelium	Cervix	3.5435e-17	1.38374e-17	4.27967e-18	8.97796e-18	3.08735e-16
202	42950	MYC	LoVo	None	Colon	1.1771e-17	1.15556e-17	6.92223e-18	9.49503e-18	3.24899e-16
203	45810	MXI1	HepG2	Epithelium	Liver	3.3675e-16	1.13868e-12	3.49917e-18	1.03895e-17	3.53755e-16
204	73696	LEO1	SEM	B Lymphocyte	None	2.88207e-17	4.68211e-18	6.13012e-17	1.13383e-17	3.84169e-16
205	50573	MYB	None	None	None	8.70839e-16	1.56523e-12	4.06358e-18	1.21341e-17	4.09126e-16
206	36844	MYC	MDA-MB-453	Epithelium	Mammary Gland	1.03111e-15	3.82597e-12	4.26466e-18	1.27436e-17	4.27592e-16
207	32814	MAX	P493-6	B cell lymphoma	None	4.07628e-16	1.14463e-17	7.66614e-18	1.36202e-17	4.54795e-16
208	70816	SP1	HCT-116	Colon cancer cell	Colon	4.9047e-16	4.88437e-14	4.83258e-18	1.43549e-17	4.77024e-16
209	70812	SP1	HCT-116	Colon cancer cell	Colon	4.04658e-15	1.31873e-10	4.92233e-18	1.47491e-17	4.85462e-16
210	56357	BRD4	MOLM-14	Myeloid Cell	None	8.99894e-17	4.20397e-17	5.93471e-18	1.47493e-17	4.85462e-16
211	34392	MECP2	IMR90	Fibroblast	Lung	1.06505e-16	3.06534e-15	5.3234e-18	1.51848e-17	4.97428e-16
212	45894	MYC	K562	Erythroblast	Bone Marrow	9.82063e-14	9.80537e-08	5.5897e-18	1.67682e-17	5.46705e-16
213	68635	KMT2D	None	patient derived xenograft cells	None	6.08097e-16	6.01184e-18	1.44261e-16	1.71512e-17	5.56569e-16
214	69871	BRD4	None	Th1	None	3.03287e-15	4.89139e-16	5.86855e-18	1.7364e-17	5.60841e-16
215	33197	MAX	U87	None	Brain	3.60428e-17	7.47846e-08	7.24568e-18	1.80987e-17	5.81851e-16
216	45797	MAX	HepG2	Epithelium	Liver	3.33516e-16	5.70731e-14	6.21646e-18	1.83062e-17	5.85798e-16
217	43763	BRD4	DND-41	T Lymphocyte	Blood	1.54703e-16	9.01744e-18	2.47469e-17	1.90151e-17	6.05679e-16
218	72406	PARP1	MCF-7	Human Breast Cancer Cell	Breast	6.25121e-17	2.17753e-16	7.4122e-18	1.92923e-17	6.11691e-16
219	67714	CREB1	LNCaP	Epithelium	Prostate	2.11103e-16	2.2452e-13	7.00996e-18	2.03534e-17	6.42386e-16
220	48576	KDM6B	CUTLL1	T Lymphocyte	Blood	2.8393e-16	1.32601e-09	7.16961e-18	2.09791e-17	6.59124e-16
221	1875	RBL2	IMR90	Fibroblast	Lung	1.6516e-17	2.62628e-17	2.56392e-17	2.17981e-17	6.81757e-16
222	40221	BRD4	U87	None	Brain	7.04722e-15	1.95945e-11	7.61338e-18	2.28156e-17	7.10368e-16
223	67768	NFE2	F5	Erythroid Progenitor Cell	Fetal Liver	5.67985e-13	3.9333e-08	8.55716e-18	2.56711e-17	7.95688e-16
224	46127	ELF1	GM12878	B Lymphocyte	Blood	6.56078e-16	5.01988e-13	8.73532e-18	2.58612e-17	7.98002e-16
225	8482	KAT7	RKO	Epithelium	Colon	1.09929e-17	3.03617e-15	2.03601e-16	3.11829e-17	9.57938e-16
226	45421	RBBP5	K562	Erythroblast	Bone Marrow	1.20148e-16	5.08463e-15	1.19217e-17	3.24678e-17	9.92996e-16
227	70813	SP1	HCT-116	Colon cancer cell	Colon	8.71531e-15	4.74257e-11	1.1094e-17	3.32398e-17	1.01213e-15
228	43195	FOXM1	HeLa	Epithelium	Cervix	1.57527e-16	2.21789e-17	2.95239e-17	3.51672e-17	1.06612e-15
229	46278	ETS1	K562	Erythroblast	Bone Marrow	7.87195e-17	8.95686e-17	1.66395e-17	3.57288e-17	1.07842e-15
230	39047	BRD4	MM1.S	B Lymphocyte	Blood	1.69046e-15	2.01677e-15	1.31333e-17	3.88473e-17	1.16745e-15
231	58939	NRF1	HCC1954	Epithelium	Mammary Gland	4.19632e-15	1.8577e-12	1.47604e-17	4.41279e-17	1.3204e-15
232	8799	SAP30	K562	Erythroblast	Bone Marrow	4.02609e-17	3.3867e-17	8.41988e-17	4.52885e-17	1.34929e-15
233	43684	KDM4C	KYSE-150	Epitheloid Cell	Esophagus	4.3256e-17	2.47559e-15	2.47767e-17	4.69633e-17	1.39318e-15
234	74209	BRD2	SF8628	None	Pontine	2.03095e-16	4.22065e-17	3.15266e-17	4.97215e-17	1.4687e-15
235	65164	ZNF770	HEK293	Epithelium	Embryonic Kidney	7.20946e-17	2.18594e-17	1.72277e-14	5.02717e-17	1.47863e-15
236	69816	NELFE	MCF-7	Human Breast Cancer Cell	Breast	6.15452e-16	5.22871e-17	2.5908e-17	5.05492e-17	1.48049e-15
237	75559	BRD4	None	None	Retina	1.55722e-16	2.29642e-12	1.92796e-17	5.14663e-17	1.49674e-15
238	73526	BRD4	SUM159PT	mammary carcinoma cell line	Breast	3.62606e-15	1.93539e-10	1.72609e-17	5.15372e-17	1.49674e-15
239	46258	TAF1	HepG2	Epithelium	Liver	3.6716e-16	2.0583e-09	1.9145e-17	5.45886e-17	1.57873e-15
240	36234	XRN2	HEK293	Epithelium	Embryonic Kidney	6.40965e-17	9.39116e-16	2.75713e-17	5.66723e-17	1.63216e-15
241	39350	KLF1	None	Erythroid Cell	None	8.43787e-12	3.46333e-06	1.90172e-17	5.70514e-17	1.63626e-15
242	3273	GATA1	None	Proerythroblast	Bone Marrow	4.55276e-15	1.78649e-14	1.95775e-17	5.8417e-17	1.6685e-15
243	46012	MAX	NB4	Promyelocytic cell	Blood	4.7466e-13	7.35231e-08	1.97713e-17	5.93114e-17	1.68708e-15
244	73453	T	None	Th1	None	6.3535e-14	3.54637e-10	1.98977e-17	5.96745e-17	1.69045e-15
245	41831	ZBTB17	MDA-MD-231	Epithelium	Mammary Gland	8.45436e-17	1.08078e-15	2.74801e-17	6.10447e-17	1.72221e-15
246	45761	MAZ	HeLa-S3	Epithelium	Cervix	4.94016e-15	1.55007e-14	2.06908e-17	6.17328e-17	1.73454e-15
247	36845	AR	MDA-MB-453	Epithelium	Mammary Gland	4.93078e-15	6.72644e-10	2.09146e-17	6.24807e-17	1.74845e-15
248	59170	SETD1A	SEM	Pre-B Lymphocyte	None	3.35408e-17	9.94806e-16	6.15061e-17	6.37237e-17	1.77604e-15
249	53325	SUPT5H	HeLa	Epithelium	Cervix	2.7576e-16	5.44467e-16	2.43701e-17	6.45205e-17	1.79103e-15
250	70804	TCF7L1	HCT-116	Colon cancer cell	Colon	8.23841e-16	1.29426e-08	2.24849e-17	6.56625e-17	1.81544e-15
251	43634	MED1	OCI-Ly1	B cell lymphoma	Bone Marrow	2.17567e-14	2.29543e-15	2.45647e-17	7.28278e-17	2.00552e-15
252	52358	MYC	P493-6	B cell lymphoma	None	5.59332e-16	2.66408e-16	3.02382e-17	7.76955e-17	2.13108e-15
253	53013	E2F1	LNCaP-abl	Epithelium	Prostate	1.22486e-15	1.55629e-11	2.86541e-17	8.39911e-17	2.29465e-15
254	39352	GATA1	None	Erythroid Cell	None	1.43021e-12	1.89073e-08	3.26679e-17	9.80014e-17	2.66687e-15
255	55338	SUMO2	K562	Erythroblast	Bone Marrow	1.44948e-14	8.22356e-11	3.30296e-17	9.88636e-17	2.67979e-15
256	76149	MYC	LNCaP	Epithelium	Prostate	9.2841e-16	9.34094e-13	3.5743e-17	1.0325e-16	2.78775e-15
257	37056	FLI1	U937	None	Pleura	2.04643e-14	3.58331e-11	3.46108e-17	1.03657e-16	2.78786e-15
258	74666	NRF1	K562	Erythroblast	Bone Marrow	3.51385e-15	1.40677e-12	3.54799e-17	1.05364e-16	2.82277e-15
259	33189	MYC	P493-6	B cell lymphoma	None	1.26613e-15	1.51278e-15	3.74218e-17	1.06528e-16	2.84295e-15
260	58808	MAF	None	Th1	None	1.44741e-15	1.77818e-15	3.89981e-17	1.11525e-16	2.96484e-15
261	69770	BRD4	MV4;11	Leukemia Cell	Blood	1.86363e-14	3.932e-13	3.75735e-17	1.12484e-16	2.97888e-15
262	38183	MYC	MCF-7	Epithelium	Breast	3.34813e-15	6.88237e-09	4.51189e-17	1.33553e-16	3.52336e-15
263	43104	NOTCH1	CUTLL1	T Lymphocyte	Blood	2.16649e-15	3.48621e-16	5.74807e-17	1.44802e-16	3.80559e-15
264	69201	TRIM24	LNCaP	Epithelium	Prostate	1.44123e-15	2.4065e-09	5.08165e-17	1.47229e-16	3.85472e-15
265	73454	T	None	Th1	None	9.46262e-13	8.26361e-09	5.35548e-17	1.60655e-16	4.18066e-15
266	70093	TET2	293T	None	None	6.43292e-17	3.94495e-13	3.22685e-16	1.60887e-16	4.18066e-15
267	46108	TAF1	GM12878	B Lymphocyte	Blood	1.12858e-14	2.37524e-16	7.02105e-17	1.61796e-16	4.18853e-15
268	43305	CDK6	None	None	None	1.1536e-15	5.25378e-15	5.87716e-17	1.66e-16	4.28132e-15
269	55405	KMT2D	OCI-Ly7	B cell lymphoma	Blood	1.73365e-15	2.79613e-15	6.00525e-17	1.70501e-16	4.38106e-15
270	45650	MAX	GM12878	B Lymphocyte	Blood	3.04689e-15	5.27634e-15	5.91456e-17	1.72193e-16	4.40814e-15
271	37621	CBFB	U937	None	Pleura	6.11041e-15	5.44854e-14	6.24974e-17	1.8538e-16	4.72821e-15
272	46008	MYC	MCF-10A	Epithelium	Breast	2.89959e-14	1.36619e-09	6.33988e-17	1.89781e-16	4.80678e-15
273	73699	MED1	SEM	B Lymphocyte	None	4.01407e-15	1.10981e-11	6.42891e-17	1.89851e-16	4.80678e-15
274	45767	HCFC1	HeLa-S3	Epithelium	Cervix	6.74484e-15	1.1664e-16	1.43973e-16	1.91497e-16	4.83075e-15
275	45793	SREBF1	HepG2	Epithelium	Liver	1.86249e-16	3.43058e-15	1.1038e-16	2.03861e-16	5.12397e-15
276	37607	CBFB	ME-1	Leukemia Cell	None	7.56297e-15	5.16548e-10	7.17504e-17	2.13233e-16	5.34011e-15
277	37578	ELF1	ME-1	Leukemia Cell	None	9.27424e-15	6.6804e-11	7.41253e-17	2.20613e-16	5.50497e-15
278	46196	TAF1	H1	Embryonic Stem Cell	Embryo	6.63808e-16	1.08171e-08	8.36709e-17	2.22915e-16	5.5424e-15
279	56265	AR	CWR22Pc	Epithelium	Prostate	3.67199e-15	1.13784e-09	7.71718e-17	2.26779e-16	5.60156e-15
280	37633	ERG	MCF-7	Epithelium	Breast	1.07996e-14	4.68003e-06	7.61702e-17	2.26915e-16	5.60156e-15
281	58940	NRF1	HCC1954	Epithelium	Mammary Gland	1.39864e-14	9.19736e-12	7.77426e-17	2.31939e-16	5.70521e-15
282	48994	AFF4	HeLa	Epithelium	Cervix	4.36667e-15	3.29371e-13	8.0026e-17	2.35735e-16	5.77801e-15
283	74052	NKX2-1	A549	Epithelium	Lung	1.23461e-13	1.45528e-09	7.92982e-17	2.37742e-16	5.80662e-15
284	8117	MYC	K562	Erythroblast	Bone Marrow	1.6132e-15	1.04902e-15	9.28804e-17	2.4389e-16	5.93581e-15
285	40216	MED1	None	B Lymphocyte	Blood	1.44539e-15	2.99036e-14	9.02105e-17	2.53884e-16	6.15736e-15
286	63655	SIN3A	MCF-7	Epithelium	Breast	1.14067e-15	1.68083e-15	1.01512e-16	2.65412e-16	6.40893e-15
287	70927	SUPT5H	BJAB	B Lymphocyte	None	7.80079e-16	4.7997e-15	1.02204e-16	2.66111e-16	6.40893e-15
288	46038	MXI1	SK-N-SH	Neuroblastoma cell	Brain	8.13735e-16	4.71487e-11	1.00339e-16	2.67973e-16	6.43134e-15
289	33177	MAX	H128	Epithelium	Lung	1.43871e-15	6.26116e-07	9.60423e-17	2.7003e-16	6.45829e-15
290	45883	MYC	K562	Erythroblast	Bone Marrow	3.88638e-13	2.35638e-08	9.10065e-17	2.72956e-16	6.50576e-15
291	72408	PARP1	MCF-7	Human Breast Cancer Cell	Breast	1.25736e-15	1.62875e-15	1.04898e-16	2.74848e-16	6.52539e-15
292	36104	ESR1	None	Epithelium	Mammary Gland	3.39868e-15	5.06608e-10	1.10931e-16	2.77556e-16	6.52539e-15
293	42712	E2F3	LoVo	None	Colon	4.71773e-16	1.79459e-13	1.45063e-16	2.77556e-16	6.52539e-15
294	46140	TCF7L1	GM12878	B Lymphocyte	Blood	1.67983e-14	1.87402e-13	1.09007e-16	2.77556e-16	6.52539e-15
295	33875	MED1	None	Plasma Cell	None	4.29927e-15	1.19116e-14	9.88355e-17	2.87463e-16	6.7354e-15
296	2279	E2F1	MCF-7	Epithelium	Breast	1.51393e-14	1.34693e-08	9.83071e-17	2.93019e-16	6.8424e-15
297	50413	KLF11	hMADS-3	Adipocyte	Adipose	1.54671e-14	1.54094e-09	1.04174e-16	3.10434e-16	7.22465e-15
298	37057	FLI1	U937	None	Pleura	1.93996e-14	2.30375e-12	1.159e-16	3.33067e-16	7.52339e-15
299	38724	GMEB2	LoVo	None	Colon	2.50775e-15	1.89432e-16	3.15013e-16	3.33067e-16	7.52339e-15
300	47283	KDM5B	MDA-MB-231	Epithelium	Breast	1.87033e-13	3.85572e-09	1.14898e-16	3.33067e-16	7.52339e-15
301	50163	TBP	K562	Erythroblast	Bone Marrow	6.20444e-16	3.81701e-13	1.4763e-16	3.33067e-16	7.52339e-15
302	58809	MAF	None	Th2	None	5.92207e-15	3.59922e-14	1.35231e-16	3.33067e-16	7.52339e-15
303	65186	EGR3	HEK293	Epithelium	Embryonic Kidney	9.86323e-14	0.0022737	1.35874e-16	3.33067e-16	7.52339e-15
304	70814	SP1	HCT-116	Colon cancer cell	Colon	4.35843e-14	5.56484e-07	1.31778e-16	3.33067e-16	7.52339e-15
305	74346	NEUROD1	D-341	None	None	5.63037e-16	4.90659e-16	2.02862e-16	3.33067e-16	7.52339e-15
306	8116	MYC	K562	Erythroblast	Bone Marrow	1.49227e-15	7.88835e-16	1.64628e-16	3.33067e-16	7.52339e-15
307	43749	BRD4	KOPT-K1	T Lymphocyte	Blood	7.79862e-16	1.27296e-15	1.92915e-16	4.44089e-16	9.86992e-15
308	46070	MAX	A549	Epithelium	Lung	5.86698e-15	2.04413e-08	1.4174e-16	4.44089e-16	9.86992e-15
309	50381	NFE2	None	Proerythroblast	Fetal Liver	2.27788e-12	1.71813e-08	1.41857e-16	4.44089e-16	9.86992e-15
310	5388	RELA	A549	Epithelium	Lung	8.27147e-15	1.99544e-09	1.4431e-16	4.44089e-16	9.86992e-15
311	67720	CREB1	LNCaP	Epithelium	Prostate	1.52399e-14	1.50055e-11	1.57069e-16	4.44089e-16	9.86992e-15
312	37349	CREB1	A549	Epithelium	Lung	4.30567e-14	3.98111e-11	1.64859e-16	4.996e-16	1.07577e-14
313	39058	BRD4	MM1.S	B Lymphocyte	Blood	3.90973e-15	8.94949e-16	2.09919e-16	4.996e-16	1.07577e-14
314	45781	TBP	HeLa-S3	Epithelium	Cervix	1.06594e-15	1.93603e-14	2.1544e-16	4.996e-16	1.07577e-14
315	45949	IRF1	K562	Erythroblast	Bone Marrow	8.67034e-13	3.36863e-10	1.73996e-16	4.996e-16	1.07577e-14
316	46236	SIN3A	HepG2	Epithelium	Liver	2.59238e-15	3.74201e-11	1.74246e-16	4.996e-16	1.07577e-14
317	46297	E2F6	K562	Erythroblast	Bone Marrow	7.51247e-14	5.14359e-06	1.70284e-16	4.996e-16	1.07577e-14
318	50414	KLF11	hMADS-3	Adipocyte	Adipose	4.30486e-15	6.03027e-12	1.74808e-16	4.996e-16	1.07577e-14
319	58844	XRN2	HEK293	Epithelium	Embryonic Kidney	4.14584e-16	1.88211e-14	2.69962e-16	4.996e-16	1.07577e-14
320	67710	CREB1	LNCaP	Epithelium	Prostate	2.43864e-15	3.19466e-12	1.84333e-16	4.996e-16	1.07577e-14
321	73507	BRD4	SUM159PT	mammary carcinoma cell line	Breast	2.73037e-15	4.57057e-12	1.71245e-16	4.996e-16	1.07577e-14
322	37638	RUNX1	SKNO-1	Myeloblast	Bone Marrow	2.28569e-11	2.65459e-07	2.03964e-16	5.55112e-16	1.17697e-14
323	45633	MXI1	GM12878	B Lymphocyte	Blood	8.43452e-15	1.4602e-15	2.39809e-16	5.55112e-16	1.17697e-14
324	49493	CDK7	Jurkat	T Lymphocyte	Blood	4.68955e-15	2.56637e-16	9.39219e-16	5.55112e-16	1.17697e-14
325	50398	MYB	Jurkat	T Lymphocyte	Blood	1.32883e-13	4.85687e-10	1.97749e-16	5.55112e-16	1.17697e-14
326	55543	RAG2	None	Thymocyte	None	4.77221e-14	4.45655e-09	1.84297e-16	5.55112e-16	1.17697e-14
327	33125	CDK9	MM1.S	B Lymphocyte	Blood	1.23241e-13	7.06846e-13	2.22761e-16	6.10623e-16	1.27127e-14
328	46324	MAX	MCF-7	Epithelium	Breast	6.56226e-15	4.37245e-06	2.26949e-16	6.10623e-16	1.27127e-14
329	49481	RPE	None	Retinal pigment cell	None	6.14914e-15	5.69241e-14	2.34737e-16	6.10623e-16	1.27127e-14
330	71040	ZNF143	MCF-7	MCF 7 Cells	None	1.46705e-13	3.56622e-09	2.08799e-16	6.10623e-16	1.27127e-14
331	74432	TFAP4	SNU175	Colorectal cancer cell line	None	4.36053e-14	4.6726e-08	2.07899e-16	6.10623e-16	1.27127e-14
332	75043	E2F1	MDA-MB-231	None	Breast	1.53422e-15	7.69704e-12	2.46677e-16	6.10623e-16	1.27127e-14
333	43756	BRD4	DND-41	T Lymphocyte	Blood	7.97827e-15	2.94361e-16	1.53744e-15	7.21645e-16	1.48012e-14
334	46154	TAF1	GM12891	Lymphoblastoid	Blood	6.82129e-15	1.07406e-15	3.26833e-16	7.21645e-16	1.48012e-14
335	46269	YY1	K562	Erythroblast	Bone Marrow	3.7095e-13	1.15546e-10	2.4183e-16	7.21645e-16	1.48012e-14
336	73514	BRD4	SUM159PT	mammary carcinoma cell line	Breast	1.08071e-14	3.22227e-11	2.46372e-16	7.21645e-16	1.48012e-14
337	73713	AFF1	SEM	B Lymphocyte	None	1.80984e-15	1.22836e-14	2.79395e-16	7.21645e-16	1.48012e-14
338	38287	MAX	H2171	Epithelium	Lung	2.34588e-14	0.000860121	3.01402e-16	8.32667e-16	1.69276e-14
339	69869	MED1	MHH-MED-1	Th1	None	5.06247e-15	5.69475e-16	6.07661e-16	8.32667e-16	1.69276e-14
340	76520	BPTF	None	Erythroid Cell	None	1.60943e-13	5.59537e-13	2.84541e-16	8.32667e-16	1.69276e-14
341	53192	MYC	MCF-10A	Epithelium	Breast	1.84272e-14	6.89678e-12	3.14128e-16	9.4369e-16	1.90725e-14
342	7060	YY1	GM12878	B Lymphocyte	Blood	1.06222e-12	7.06807e-12	3.07706e-16	9.4369e-16	1.90725e-14
343	68051	NFKB1	L1236	Hodgkin Lymphoma Cell	None	1.45674e-14	2.13773e-11	3.32915e-16	9.99201e-16	2.01355e-14
344	69807	NELFE	MCF-7	Human Breast Cancer Cell	Breast	1.3777e-14	2.2388e-15	4.40703e-16	1.05471e-15	2.11924e-14
345	32812	BRD4	P493-6	B cell lymphoma	None	7.92262e-14	1.0412e-13	3.78418e-16	1.11022e-15	2.21788e-14
346	47273	KDM5B	T47D	Epithelium	Mammary Gland	1.15739e-12	1.01325e-05	3.75318e-16	1.11022e-15	2.21788e-14
347	33934	CTCF	MM1.S	B Lymphocyte	Blood	2.34923e-12	2.21155e-07	4.05494e-16	1.22125e-15	2.4187e-14
348	45973	MYC	K562	Erythroblast	Bone Marrow	3.27484e-15	2.40313e-14	4.89202e-16	1.22125e-15	2.4187e-14
349	8118	MYC	K562	Erythroblast	Bone Marrow	1.15758e-15	4.64614e-15	7.13551e-16	1.22125e-15	2.4187e-14
350	33175	MAX	P493-6	B cell lymphoma	None	5.60335e-14	3.66777e-10	4.34399e-16	1.27676e-15	2.51423e-14
351	33195	MYC	P493-6	B cell lymphoma	None	7.08021e-14	4.78402e-14	4.37169e-16	1.27676e-15	2.51423e-14
352	53076	RBP2	U937	None	Pleura	7.65712e-15	5.52472e-16	3.23731e-15	1.33227e-15	2.58669e-14
353	70568	MYC	U2OS	None	Bone	3.58441e-14	1.24245e-15	7.18238e-16	1.33227e-15	2.58669e-14
354	70811	SP1	HCT-116	Colon cancer cell	Colon	3.26699e-13	6.48866e-07	4.6526e-16	1.33227e-15	2.58669e-14
355	72366	TCF4	Gen2.2	Plasmacytoid dendritic cell	None	2.15866e-11	2.62378e-08	4.59111e-16	1.33227e-15	2.58669e-14
356	73715	KMT2A	SEM	B Lymphocyte	None	1.29386e-15	3.88144e-06	7.15231e-16	1.33227e-15	2.58669e-14
357	56251	MYBL2	None	Epithelium	Mammary Gland	1.09593e-15	1.62052e-15	1.71291e-15	1.38778e-15	2.67942e-14
358	71936	MYC	U2OS	None	Bone	5.05231e-15	1.61482e-15	7.68891e-16	1.38778e-15	2.67942e-14
359	45989	MYC	MCF-7	Epithelium	Breast	2.65033e-14	1.51981e-07	5.17895e-16	1.4988e-15	2.86973e-14
360	46141	CREB1	GM12878	B Lymphocyte	Blood	9.57381e-14	1.38774e-12	4.9904e-16	1.4988e-15	2.86973e-14
361	72049	MYC	Gen2.2	None	None	2.49962e-14	1.64878e-14	5.31658e-16	1.4988e-15	2.86973e-14
362	39978	TFAP2C	A375	None	Skin	2.73428e-13	3.04741e-09	5.14781e-16	1.55431e-15	2.95149e-14
363	43400	XBP1	T47D	Epithelium	Mammary Gland	1.45642e-14	2.93283e-15	6.71668e-16	1.55431e-15	2.95149e-14
364	63656	SIN3A	MCF-7	Epithelium	Breast	7.52071e-14	2.15217e-14	5.41165e-16	1.55431e-15	2.95149e-14
365	37175	MYC	H2171	Epithelium	Lung	4.04149e-14	0.000330674	5.62049e-16	1.60982e-15	3.02367e-14
366	38288	MYC	H2171	Epithelium	Lung	2.29737e-15	5.83374e-11	7.19368e-16	1.60982e-15	3.02367e-14
367	63407	POLR2AphosphoS5	None	iPSC	None	1.15986e-14	2.7486e-08	5.88198e-16	1.60982e-15	3.02367e-14
368	9198	TCF12	RPMI-8402	T cell leukemia	Blood	6.37625e-13	3.60359e-11	5.44507e-16	1.60982e-15	3.02367e-14
369	45965	MYC	K562	Erythroblast	Bone Marrow	2.23522e-14	4.37354e-13	6.21899e-16	1.77636e-15	3.31843e-14
370	73517	BRD4	SUM159PT	mammary carcinoma cell line	Breast	1.90776e-15	4.44443e-13	8.42746e-16	1.77636e-15	3.31843e-14
371	33932	BRD4	MM1.S	B Lymphocyte	Blood	6.06728e-14	1.67292e-13	6.28159e-16	1.83187e-15	3.3765e-14
372	45827	MYC	HepG2	Epithelium	Liver	8.27921e-15	1.77597e-11	6.67224e-16	1.83187e-15	3.3765e-14
373	46120	TCF12	GM12878	B Lymphocyte	Blood	4.29072e-13	4.571e-11	6.08679e-16	1.83187e-15	3.3765e-14
374	58936	NRF1	None	Epithelium	None	1.95545e-14	3.85046e-11	6.45125e-16	1.83187e-15	3.3765e-14
375	64667	NRF1	HepG2	Epithelium	Liver	7.51813e-15	3.12587e-11	6.7905e-16	1.83187e-15	3.3765e-14
376	5570	POLR2M	HeLa	Epithelium	Cervix	2.60976e-14	2.30123e-12	6.5433e-16	1.88738e-15	3.46036e-14
377	72352	RUNX1	Kasumi-1	Acute myeloid leukemia	None	7.41432e-13	3.27388e-09	6.49467e-16	1.88738e-15	3.46036e-14
378	43097	ETS1	CUTLL1	T Lymphocyte	Blood	4.18885e-14	1.003e-09	7.04226e-16	2.05391e-15	3.74582e-14
379	74431	TFAP4	COLO-320	Colorectal cancer cell line	None	3.86417e-14	1.55493e-11	7.03079e-16	2.05391e-15	3.74582e-14
380	64760	POLR2AphosphoS5	None	Neuron	None	3.71546e-15	1.26392e-08	8.65035e-16	2.10942e-15	3.83693e-14
381	64913	BCL3	A549	Epithelium	Lung	6.66929e-14	7.48003e-12	7.67921e-16	2.27596e-15	4.12898e-14
382	46094	MAX	ECC-1	Epithelium	Endometrium	2.20982e-14	1.25674e-06	8.35974e-16	2.38698e-15	4.30778e-14
383	58841	XRN2	HEK293	Epithelium	Embryonic Kidney	2.85342e-15	4.63398e-13	1.12845e-15	2.38698e-15	4.30778e-14
384	74357	NEUROD1	D-341	None	None	1.87038e-15	3.43759e-09	1.40081e-15	2.498e-15	4.4964e-14
385	46204	YY1	HCT-116	None	Colon	3.95457e-13	7.1764e-11	9.26954e-16	2.77556e-15	4.98303e-14
386	64866	ZFX	K562	Erythroblast	Bone Marrow	5.55691e-15	7.37463e-14	1.13872e-15	2.83107e-15	5.06952e-14
387	70569	MYC	U2OS	None	Bone	7.51665e-15	1.73778e-11	1.1755e-15	2.94209e-15	5.25471e-14
388	53256	FOXM1	HEK293	Epithelium	Embryonic Kidney	5.67871e-15	2.43436e-14	1.27525e-15	3.05311e-15	5.42497e-14
389	63028	MBD2	K562	Erythroblast	Bone Marrow	2.44374e-14	3.40257e-13	1.05032e-15	3.05311e-15	5.42497e-14
390	74202	BRD2	None	None	Pontine	1.1257e-14	3.33043e-13	1.13854e-15	3.10862e-15	5.50944e-14
391	37584	TBP	ME-1	Leukemia Cell	None	6.55486e-14	3.42091e-14	1.09844e-15	3.27516e-15	5.78974e-14
392	45714	TCF7L2	HCT-116	None	Colon	1.94112e-13	5.48661e-11	1.09116e-15	3.38618e-15	5.94043e-14
393	69815	NELFE	MCF-7	Human Breast Cancer Cell	Breast	1.42075e-14	3.09208e-15	2.04881e-15	3.38618e-15	5.94043e-14
394	76965	CNOT3	None	None	Snap-frozen tissue	8.61195e-14	0.00076624	1.16199e-15	3.38618e-15	5.94043e-14
395	45762	CEBPB	HeLa-S3	Epithelium	Cervix	1.16e-12	2.2464e-11	1.14451e-15	3.44169e-15	6.02252e-14
396	35851	CTCF	GM12892	Lymphoblastoid	Blood	1.52951e-13	4.7082e-07	1.2356e-15	3.60822e-15	6.25064e-14
397	58937	NRF1	None	Epithelium	None	1.13053e-13	3.34057e-11	1.24742e-15	3.60822e-15	6.25064e-14
398	69820	NELFE	MCF-7	Human Breast Cancer Cell	Breast	9.93424e-15	7.09929e-15	1.68975e-15	3.60822e-15	6.25064e-14
399	70095	TET2	293T	None	None	1.60347e-15	1.97334e-10	4.60025e-15	3.60822e-15	6.25064e-14
400	53298	SPI1	TSU-1621-MT	None	None	1.09578e-12	3.66007e-06	1.28112e-15	3.83027e-15	6.61871e-14
401	5395	SP1	HCT-116	None	Colon	8.44714e-15	0.000277694	1.53785e-15	3.94129e-15	6.77667e-14
402	55718	SUMO2	VCaP	Epithelium	Prostate	7.0771e-14	2.75139e-06	1.31476e-15	3.94129e-15	6.77667e-14
403	65204	YY1	HEK293	Epithelium	Embryonic Kidney	1.3613e-13	4.55144e-05	1.34098e-15	4.05231e-15	6.95027e-14
404	70808	MYC	HCT-116	Colon cancer cell	Colon	1.01117e-14	2.21978e-11	1.55982e-15	4.10783e-15	7.02804e-14
405	46338	REST	PFSK-1	Neuron	Brain	7.26782e-14	4.57712e-09	1.44692e-15	4.16334e-15	7.10543e-14
406	36765	NOTCH1	HPB-ALL	T Lymphocyte	Blood	8.32253e-13	1.77056e-10	1.42911e-15	4.21885e-15	7.12975e-14
407	46216	MAX	HCT-116	None	Colon	4.9719e-13	1.69246e-06	1.37976e-15	4.21885e-15	7.12975e-14
408	46341	REST	SK-N-SH	Neuroblastoma cell	Brain	1.51409e-14	1.59241e-08	1.55651e-15	4.21885e-15	7.12975e-14
409	73701	KDM2B	SEM	B Lymphocyte	None	1.51808e-14	6.64069e-08	1.5555e-15	4.21885e-15	7.12975e-14
410	76673	ZMYND8	DU145	Epithelium	Prostate	2.48256e-15	1.00351e-13	3.58071e-15	4.38538e-15	7.39311e-14
411	45560	MYC	A549	Epithelium	Lung	2.37866e-14	3.02203e-15	3.35841e-15	4.44089e-15	7.45035e-14
412	666	MYC	GM12878	B Lymphocyte	Blood	9.52884e-14	3.48559e-14	1.53291e-15	4.44089e-15	7.45035e-14
413	46335	SIN3A	PFSK-1	Neuron	Brain	7.68718e-15	1.61752e-14	2.32116e-15	4.82947e-15	8.08264e-14
414	5389	RELA	A549	Epithelium	Lung	1.5276e-13	2.48912e-08	1.62884e-15	4.88498e-15	8.15579e-14
415	46327	SIN3A	MCF-7	Epithelium	Breast	4.00217e-14	6.91186e-12	1.8069e-15	5.27356e-15	8.78334e-14
416	50894	SPI1	None	None	None	1.76926e-14	4.66105e-15	3.63451e-15	5.4956e-15	9.10926e-14
417	52432	WDR5	HEK293	Epithelium	Embryonic Kidney	5.23715e-15	2.47646e-10	2.83149e-15	5.4956e-15	9.10926e-14
418	74348	NEUROD1	D-341	None	None	2.70452e-15	2.34477e-12	6.90062e-15	5.77316e-15	9.54643e-14
419	46266	ELF1	K562	Erythroblast	Bone Marrow	1.36864e-12	1.42442e-07	1.97566e-15	5.93969e-15	9.72871e-14
420	46268	GABPA	K562	Erythroblast	Bone Marrow	5.56739e-13	1.26864e-11	1.98918e-15	5.93969e-15	9.72871e-14
421	47285	KDM5B	HCC2157	Epithelium	Mammary Gland	1.2882e-12	2.23149e-07	2.00333e-15	5.93969e-15	9.72871e-14
422	67711	CREB1	LNCaP	Epithelium	Prostate	2.38538e-14	1.01255e-13	2.22061e-15	5.93969e-15	9.72871e-14
423	45907	MAX	K562	Erythroblast	Bone Marrow	7.42688e-12	4.45355e-06	2.06084e-15	6.21725e-15	1.01592e-13
424	46292	MAX	K562	Erythroblast	Bone Marrow	1.09012e-12	0.00345234	2.1375e-15	6.55032e-15	1.06531e-13
425	6710	SRC	OCI-Ly2	Epithelium	Mammary Gland	4.80921e-13	2.95838e-11	2.23231e-15	6.55032e-15	1.06531e-13
426	38663	MYC	LoVo	None	Colon	3.29477e-15	1.95092e-11	7.28014e-15	6.77236e-15	1.09627e-13
427	57173	BRD4	MOLM-14	Myeloid Cell	None	5.72906e-14	9.86463e-12	2.31839e-15	6.77236e-15	1.09627e-13
428	38653	MED12	LoVo	None	Colon	1.0288e-14	2.13731e-12	2.92101e-15	6.93889e-15	1.1206e-13
429	37173	MAX	H2171	Epithelium	Lung	2.65448e-12	0.00289789	2.3184e-15	6.99441e-15	1.12693e-13
430	39357	NFE2	None	Erythroid Cell	None	3.61353e-11	6.29496e-06	2.36747e-15	7.27196e-15	1.16893e-13
431	55339	SUMO2	K562	Erythroblast	Bone Marrow	2.25678e-13	7.63051e-11	2.42344e-15	7.32747e-15	1.1724e-13
432	64773	SUPT5H	K562	Erythroblast	Bone Marrow	1.69369e-14	5.01123e-14	3.05536e-15	7.32747e-15	1.1724e-13
433	57175	BRD4	MOLM-14	Myeloid Cell	None	2.88167e-14	3.24917e-14	3.24668e-15	8.04912e-15	1.28488e-13
434	72359	ERG	Kasumi-1	Acute myeloid leukemia	None	6.18571e-11	6.18025e-06	2.70711e-15	8.10463e-15	1.29076e-13
435	5969	MYC	Ramos	B Lymphocyte	None	4.45495e-14	8.75341e-15	4.3728e-15	8.27116e-15	1.31426e-13
436	72356	TAL1	Kasumi-1	Acute myeloid leukemia	None	9.02833e-14	5.15299e-15	7.82722e-15	9.04832e-15	1.43445e-13
437	46306	THAP1	K562	Erythroblast	Bone Marrow	4.87909e-14	8.88552e-15	5.15149e-15	9.21485e-15	1.45751e-13
438	38698	E2F7	LoVo	None	Colon	6.84595e-14	4.37165e-15	1.29494e-14	9.38138e-15	1.47709e-13
439	46226	YY1	HepG2	Epithelium	Liver	1.98108e-13	5.99105e-09	3.1819e-15	9.38138e-15	1.47709e-13
440	58840	XRN2	HEK293	Epithelium	Embryonic Kidney	1.43815e-14	3.37104e-12	3.98575e-15	9.49241e-15	1.49117e-13
441	46195	TAF7	H1	Embryonic Stem Cell	Embryo	9.44487e-15	1.38701e-12	4.84097e-15	9.54792e-15	1.49649e-13
442	75942	KDM1A	PC-3M-luc	None	Prostate	9.67876e-14	1.09785e-14	4.69209e-15	9.60343e-15	1.50179e-13
443	50412	KLF11	hMADS-3	Adipocyte	Adipose	8.2335e-13	1.55637e-07	3.2898e-15	9.76996e-15	1.52438e-13
444	56379	CDK8	K562	Erythroblast	Bone Marrow	5.28946e-14	4.28161e-15	1.94674e-14	9.82547e-15	1.52959e-13
445	276	SMAD3	BG03	Embryonic Stem Cell	Embryo	1.26569e-13	7.5176e-05	3.49321e-15	1.01585e-14	1.57788e-13
446	53593	MED1	None	Adipocyte	None	5.31806e-14	3.38157e-11	3.65062e-15	1.03251e-14	1.59658e-13
447	8659	HDAC2	VCaP	Epithelium	Prostate	6.47326e-15	4.72878e-13	7.36406e-15	1.03251e-14	1.59658e-13
448	51103	CHD8	None	Neural Stem Cell	None	6.55556e-15	2.62068e-14	1.10631e-14	1.06581e-14	1.64074e-13
449	71935	MYC	U2OS	None	Bone	2.02881e-13	1.26138e-14	5.11283e-15	1.06581e-14	1.64074e-13
450	49949	KLF9	GBM1A	Glioblastoma Stem Cell	None	4.3168e-13	3.71428e-05	3.67317e-15	1.09357e-14	1.67972e-13
451	52092	TP53	IMR90	Fibroblast	Lung	1.19961e-14	1.24023e-14	9.51136e-15	1.11022e-14	1.70152e-13
452	74349	OTX2	D-341	None	None	4.21293e-15	1.26244e-12	3.52964e-14	1.13798e-14	1.7402e-13
453	40053	CDK7	None	B Lymphocyte	Blood	4.12965e-13	9.74383e-15	6.42186e-15	1.15463e-14	1.76177e-13
454	70754	MYC	LNCaP	None	LNCaP cells	1.77361e-10	4.02687e-15	1.52348e-10	1.21569e-14	1.85085e-13
455	35517	BCL6	OCI-Ly1	B cell lymphoma	Bone Marrow	1.75678e-13	2.55818e-10	4.21442e-15	1.24345e-14	1.88895e-13
456	72360	FLI1	Kasumi-1	Acute myeloid leukemia	None	1.01132e-11	8.43388e-08	4.16374e-15	1.249e-14	1.89322e-13
457	75137	MYB	PF382	None	Blood	8.731e-13	2.73979e-09	4.20901e-15	1.27121e-14	1.92266e-13
458	33506	ESR1	None	Epithelium	Mammary Gland	4.7738e-14	1.3758e-07	4.79114e-15	1.31561e-14	1.98549e-13
459	56978	GTF2B	HeLa	Epithelium	Cervix	3.54613e-14	6.79484e-15	2.31944e-14	1.37113e-14	2.06475e-13
460	75284	ZBTB48	HeLa	None	None	5.41446e-15	5.42657e-12	3.41668e-14	1.40443e-14	2.11031e-13
461	64772	SUPT5H	K562	Erythroblast	Bone Marrow	2.40246e-14	1.03466e-14	1.36085e-14	1.41553e-14	2.12238e-13
462	1219	GATAD1	HeLa	Epithelium	Cervix	2.64842e-13	8.93264e-15	1.09459e-14	1.44884e-14	2.16762e-13
463	34999	FOXM1	MDA-MB-231	Epithelium	Breast	3.07064e-13	9.08815e-15	1.07908e-14	1.45439e-14	2.17122e-13
464	71042	ZNF143	MCF-7	MCF 7 Cells	None	4.41813e-12	1.21621e-06	4.89209e-15	1.46549e-14	2.18308e-13
465	45618	TBP	GM12878	B Lymphocyte	Blood	9.67298e-14	2.18475e-13	5.34098e-15	1.4766e-14	2.19489e-13
466	69761	BRD4	MV4;11	Leukemia Cell	Blood	1.18533e-12	4.16157e-11	4.98931e-15	1.50435e-14	2.23135e-13
467	73708	KMT2A	None	Monocyte	Cord blood	6.84374e-13	3.84153e-09	5.11917e-15	1.52101e-14	2.25122e-13
468	45628	MYC	GM12878	B Lymphocyte	Blood	1.11305e-13	1.49218e-14	8.33544e-15	1.53211e-14	2.26281e-13
469	65056	TGIF2	HepG2	Epithelium	Liver	4.10348e-14	1.11937e-12	5.97336e-15	1.57097e-14	2.31525e-13
470	73518	BRD4	SUM159PT	mammary carcinoma cell line	Breast	2.04445e-13	2.82631e-12	5.63808e-15	1.65423e-14	2.43278e-13
471	39002	BRD4	MM1.S	B Lymphocyte	Blood	5.25263e-13	5.01345e-09	5.63043e-15	1.65978e-14	2.43576e-13
472	37583	ERG	ME-1	Leukemia Cell	None	8.79971e-11	0.00190861	5.74586e-15	1.74305e-14	2.55253e-13
473	50569	MYB	Jurkat	T Lymphocyte	Blood	3.87938e-13	1.49813e-12	6.1591e-15	1.80966e-14	2.64448e-13
474	69809	NELFE	MCF-7	Human Breast Cancer Cell	Breast	8.7014e-14	1.38132e-14	1.28667e-14	1.85962e-14	2.71175e-13
475	42926	MYC	GP5d	None	Colon	1.52633e-14	3.133e-14	1.67071e-14	1.90958e-14	2.77875e-13
476	49536	RUNX1	None	Leukemic Blast Cell	None	2.83325e-12	1.62261e-07	6.41367e-15	1.93179e-14	2.79341e-13
477	53296	ERG	TSU-1621-MT	None	None	5.44284e-12	5.78995e-05	6.41902e-15	1.93179e-14	2.79341e-13
478	55493	RUNX1	None	Stem cell	Blood	2.83325e-12	1.62261e-07	6.41367e-15	1.93179e-14	2.79341e-13
479	73714	AFF1	SEM	B Lymphocyte	None	1.42652e-14	2.19353e-11	1.18109e-14	1.93734e-14	2.79411e-13
480	47276	KDM5B	SUM185PE	Epithelium	Mammary Gland	1.74044e-12	2.41377e-05	6.4731e-15	1.94844e-14	2.79411e-13
481	70731	FOXK1	HEK293	HEK 293 Cell Line	None	2.08901e-13	3.85255e-14	8.16847e-15	1.94844e-14	2.79411e-13
482	73707	KMT2A	None	Monocyte	Bone Marrow	9.08058e-12	6.08435e-08	6.4899e-15	1.94844e-14	2.79411e-13
483	50107	CHRM2	U937	None	Pleura	2.45681e-14	3.37159e-14	1.26619e-14	2.0095e-14	2.87571e-13
484	32791	MYC	P493-6	B cell lymphoma	None	1.04187e-13	1.81065e-13	7.53586e-15	2.03726e-14	2.90941e-13
485	67718	CREB1	LNCaP	Epithelium	Prostate	1.07029e-13	3.49786e-11	7.27045e-15	2.04836e-14	2.91323e-13
486	72089	AFF1	None	Leukemic cells	Bone Marrow	2.32812e-13	5.82441e-14	8.01452e-15	2.04836e-14	2.91323e-13
487	50415	KLF11	hMADS-3	Adipocyte	Adipose	6.64053e-14	8.91958e-10	8.01103e-15	2.14273e-14	3.04118e-13
488	43050	BRD3	MM1.S	B Lymphocyte	Blood	1.07373e-12	2.04901e-13	7.48196e-15	2.15383e-14	3.05067e-13
489	45632	BHLHE40	GM12878	B Lymphocyte	Blood	1.26238e-12	9.56185e-12	7.37415e-15	2.19269e-14	3.09936e-13
490	65084	SP2	HEK293	Epithelium	Embryonic Kidney	7.40172e-14	1.28555e-08	8.14853e-15	2.19824e-14	3.10087e-13
491	53493	SOX9	HT29	Epithelium	Colon	1.09519e-13	3.33556e-11	7.97205e-15	2.23155e-14	3.14144e-13
492	394	RBPJ	CUTLL1	T Lymphocyte	Blood	4.21414e-14	5.05295e-14	1.18385e-14	2.33702e-14	3.28323e-13
493	71138	BRD4	MCF-10A	Epithelium	None	3.45658e-14	2.40836e-14	1.74349e-14	2.34812e-14	3.29213e-13
494	63451	HDAC1	K562	Erythroblast	Bone Marrow	2.27068e-13	2.55831e-10	8.14233e-15	2.35922e-14	3.301e-13
495	64621	NRF1	K562	Erythroblast	Bone Marrow	4.33194e-13	1.34553e-09	8.18748e-15	2.39808e-14	3.34859e-13
496	72367	TCF4	CAL-1	Plasmacytoid dendritic cell	None	2.55191e-11	1.86367e-09	8.48867e-15	2.54241e-14	3.54297e-13
497	59165	KMT2A	SEM	Pre-B Lymphocyte	None	1.45176e-14	2.88777e-14	7.40489e-14	2.56462e-14	3.56672e-13
498	58845	XRN2	HEK293	Epithelium	Embryonic Kidney	6.39352e-14	8.59199e-13	1.04597e-14	2.67009e-14	3.70595e-13
499	33458	ERG	None	Hematopoietic Cell	None	5.28678e-12	0.00597814	9.01058e-15	2.69229e-14	3.72928e-13
500	46230	CEBPD	HepG2	Epithelium	Liver	9.10525e-14	4.39123e-11	1.04763e-14	2.81997e-14	3.89832e-13
501	73511	BRD4	SUM159PT	mammary carcinoma cell line	Breast	2.27354e-13	6.41342e-11	1.01195e-14	2.90323e-14	4.00542e-13
502	41289	STAT1	None	Monocyte	Blood	4.77324e-11	1.40574e-07	9.83768e-15	2.94764e-14	4.05859e-13
503	43631	BRD4	OCI-Ly1	B cell lymphoma	Bone Marrow	1.40763e-12	2.23942e-14	1.91667e-14	3.07532e-14	4.22596e-13
504	40217	BRD4	U87	None	Brain	5.90773e-12	8.16028e-10	1.04058e-14	3.11418e-14	4.26241e-13
505	45990	MYC	MCF-7	Epithelium	Breast	4.41991e-13	9.40932e-13	1.0738e-14	3.11418e-14	4.26241e-13
506	46060	SP1	A549	Epithelium	Lung	4.62208e-13	1.1448e-09	1.17501e-14	3.45834e-14	4.72413e-13
507	45684	TBP	H1	Embryonic Stem Cell	Embryo	7.59296e-14	6.39485e-08	1.39031e-14	3.51941e-14	4.79616e-13
508	9317	SMC1A	BCBL1	B cell lymphoma	None	2.51541e-12	1.68834e-08	1.18065e-14	3.52496e-14	4.79616e-13
509	34962	KMT2A	RS4	B Lymphocyte	None	2.31817e-14	6.94517e-14	3.82443e-14	3.58602e-14	4.86966e-13
510	69884	T	None	Th1	None	1.67915e-12	3.14809e-11	1.24224e-14	3.70259e-14	5.0181e-13
511	46237	GABPA	HepG2	Epithelium	Liver	1.01569e-13	8.76108e-11	1.4359e-14	3.77476e-14	5.1059e-13
512	74645	USF2	GM12878	B Lymphocyte	Blood	1.61703e-13	6.07563e-10	1.44869e-14	3.99125e-14	5.38819e-13
513	64622	NRF1	K562	Erythroblast	Bone Marrow	9.52326e-13	1.68235e-10	1.35824e-14	4.01346e-14	5.4076e-13
514	46011	MYC	NB4	Promyelocytic cell	Blood	5.30284e-11	3.2875e-06	1.38094e-14	4.15779e-14	5.59117e-13
515	46180	MAX	H1	Embryonic Stem Cell	Embryo	1.97952e-13	0.0039879	1.52226e-14	4.2355e-14	5.6736e-13
516	46215	SP1	HCT-116	None	Colon	4.72423e-12	1.1976e-08	1.41355e-14	4.2355e-14	5.6736e-13
517	74664	NRF1	K562	Erythroblast	Bone Marrow	4.87348e-13	8.22338e-11	1.45928e-14	4.26326e-14	5.69973e-13
518	45234	SAP30	H1	Embryonic Stem Cell	Embryo	1.56916e-14	9.44171e-10	2.09944e-13	4.37983e-14	5.83302e-13
519	8821	SAP30	H1	Embryonic Stem Cell	Embryo	1.56916e-14	9.44171e-10	2.09944e-13	4.37983e-14	5.83302e-13
520	40164	RUNX1T1	Kasumi-1	Myeloblast	Blood	1.73962e-12	4.27095e-10	1.47603e-14	4.39648e-14	5.84394e-13
521	69758	BRD4	MV4;11	Leukemia Cell	Blood	5.6822e-11	1.17611e-08	1.54907e-14	4.64628e-14	6.16413e-13
522	392	NOTCH1	CUTLL1	T Lymphocyte	Blood	3.09526e-13	1.47006e-12	1.68081e-14	4.7351e-14	6.26993e-13
523	50565	MYB	Jurkat	T Lymphocyte	Blood	1.2726e-12	1.60184e-10	1.80052e-14	5.31242e-14	7.02092e-13
524	35298	ERG	SKNO-1	Myeloblast	Bone Marrow	4.59373e-11	2.91633e-05	1.77114e-14	5.32352e-14	7.02217e-13
525	52359	MYC	P493-6	B cell lymphoma	None	9.4569e-14	3.76893e-13	2.32751e-14	5.33462e-14	7.02341e-13
526	69868	MED1	MHH-MED-1	Th1	None	3.02938e-12	2.94128e-14	5.35142e-14	5.66214e-14	7.44044e-13
527	44562	EMX1	293FT	None	Embryonic Kidney	1.1056e-13	2.6732e-07	2.30143e-14	5.7232e-14	7.50641e-13
528	45867	MAZ	IMR90	Fibroblast	Lung	1.57255e-12	6.73586e-10	1.95404e-14	5.78426e-14	7.57212e-13
529	8820	RBBP5	H1	Embryonic Stem Cell	Embryo	2.83366e-14	5.35414e-07	6.10773e-14	5.81202e-14	7.59408e-13
530	8774	HDAC1	K562	Erythroblast	Bone Marrow	5.01734e-14	7.29849e-14	6.0116e-14	5.973e-14	7.78969e-13
531	46244	MAX	HepG2	Epithelium	Liver	8.57851e-13	6.87033e-06	2.09039e-14	6.12843e-14	7.97735e-13
532	40226	CDK9	None	B Lymphocyte	Blood	3.4166e-13	4.04797e-14	4.82164e-14	6.20615e-14	8.06332e-13
533	73512	BRD4	SUM159PT	mammary carcinoma cell line	Breast	5.67547e-13	3.17782e-11	2.15515e-14	6.22835e-14	8.07699e-13
534	63431	YY1	None	None	Liver	6.30976e-13	1.00953e-09	2.18193e-14	6.33382e-14	8.19839e-13
535	47267	KDM5B	MCF-7	Epithelium	Breast	1.02785e-12	2.6442e-08	2.18842e-14	6.41709e-14	8.29064e-13
536	76519	SETD1A	None	Erythroid Cell	None	8.02006e-13	1.81845e-12	2.24976e-14	6.4837e-14	8.36107e-13
537	64556	IKZF2	HEK293	Epithelium	Embryonic Kidney	4.50699e-13	4.2271e-05	2.35047e-14	6.69464e-14	8.61702e-13
538	46340	FOXP2	SK-N-MC	None	Brain	1.56843e-13	4.7267e-13	2.8107e-14	6.80012e-14	8.73651e-13
539	74430	ELF1	None	Colorectal cancer cell line	None	6.37078e-13	2.26717e-11	2.48594e-14	7.18314e-14	9.21148e-13
540	4974	RELA	GM12891	Lymphoblastoid	Blood	1.61603e-12	1.23536e-12	2.56247e-14	7.42739e-14	9.50706e-13
541	76859	IRAK1	HEK293	Epithelium	Embryonic Kidney	3.79843e-14	2.01855e-13	1.3197e-13	7.71605e-14	9.85829e-13
542	46132	EGR1	GM12878	B Lymphocyte	Blood	7.62711e-14	1.27944e-13	6.78295e-14	8.40994e-14	1.0725e-12
543	45924	MAZ	K562	Erythroblast	Bone Marrow	2.53384e-10	1.49788e-05	2.88675e-14	8.64864e-14	1.10091e-12
544	69755	BRD4	MV4;11	Leukemia Cell	Blood	3.70439e-13	9.69622e-13	3.34576e-14	8.93174e-14	1.13486e-12
545	73516	BRD4	SUM159PT	mammary carcinoma cell line	Breast	8.17538e-13	2.84671e-09	3.3482e-14	9.65339e-14	1.2243e-12
546	43052	BRD3	MM1.S	B Lymphocyte	Blood	7.46548e-13	3.95255e-14	2.682e-13	9.88098e-14	1.25087e-12
547	49447	HIF1A	T47D	Epithelium	Mammary Gland	1.50472e-11	0.000138331	3.59757e-14	1.07692e-13	1.36081e-12
548	41287	STAT1	None	Monocyte	Blood	1.08195e-11	4.74225e-10	3.75636e-14	1.12466e-13	1.41666e-12
549	56051	CREB1	HepG2	Epithelium	Liver	8.16604e-13	9.92542e-09	3.9312e-14	1.12521e-13	1.41666e-12
550	47266	KDM5B	MCF-7	Epithelium	Breast	1.14393e-11	8.07177e-08	3.88405e-14	1.1624e-13	1.46082e-12
551	70763	HDAC1	MM1.S	B Lymphocyte	Blood	1.16054e-12	1.00394e-10	4.04441e-14	1.17406e-13	1.4728e-12
552	661	MAX	GM12878	B Lymphocyte	Blood	8.11037e-13	1.41218e-12	4.27149e-14	1.18294e-13	1.48125e-12
553	67532	BRD4	COLO-741	None	None	7.12906e-14	4.14578e-11	9.00964e-14	1.19238e-13	1.48837e-12
554	65156	ZSCAN22	HEK293	Epithelium	Embryonic Kidney	6.59131e-14	3.78839e-13	1.36589e-13	1.19293e-13	1.48837e-12
555	55779	CTCFL	Ovcar8	None	None	1.05509e-12	3.3574e-09	4.26527e-14	1.22902e-13	1.53062e-12
556	64946	BHLHE40	IMR90	Fibroblast	Lung	1.76622e-13	1.70966e-13	7.91079e-14	1.24178e-13	1.54374e-12
557	63450	HDAC1	K562	Erythroblast	Bone Marrow	1.36005e-12	7.19533e-08	4.50474e-14	1.30951e-13	1.62501e-12
558	46126	EGR1	GM12878	B Lymphocyte	Blood	5.54913e-12	3.68543e-12	4.69836e-14	1.3789e-13	1.70805e-12
559	45661	MAZ	GM12878	B Lymphocyte	Blood	3.35958e-12	1.9927e-11	4.83228e-14	1.42719e-13	1.76471e-12
560	38591	E2F7	IMR90	Fibroblast	Lung	1.55764e-13	8.6097e-14	3.44705e-13	1.43274e-13	1.76841e-12
561	55667	PAF1	HCT-116	None	Colon	1.55285e-12	1.03165e-10	5.08174e-14	1.47604e-13	1.81861e-12
562	56982	GTF2B	HeLa	Epithelium	Cervix	5.60339e-13	1.29544e-13	9.39281e-14	1.48936e-13	1.83176e-12
563	74571	MAZ	T778	None	None	1.52622e-12	1.52022e-09	5.31082e-14	1.54154e-13	1.89257e-12
564	74343	NEUROD1	D283 Med	None	None	1.10838e-13	7.16589e-10	1.09788e-13	1.65479e-13	2.02799e-12
565	64560	SP2	HEK293	Epithelium	Embryonic Kidney	3.14385e-13	7.06963e-09	6.74937e-14	1.66755e-13	2.04002e-12
566	47413	GABPA	Jurkat	T Lymphocyte	Blood	6.70842e-12	6.53459e-09	5.6327e-14	1.67644e-13	2.04727e-12
567	44876	5HMC	None	Erythroid Cell	None	1.25576e-09	5.64737e-14	8.3606e-09	1.6942e-13	2.0637e-12
568	63406	POLR2AphosphoS5	None	iPSC	None	8.14847e-13	1.84825e-06	6.07546e-14	1.69587e-13	2.0637e-12
569	47488	MYC	U2OS	None	Bone	2.72698e-13	9.39511e-14	3.03594e-13	1.70419e-13	2.07019e-12
570	56819	TFAP2A	None	Neural crest cell	Cranial	3.00261e-12	0.00194027	5.79984e-14	1.70808e-13	2.07127e-12
571	1345	SMARCB1	HeLa	Epithelium	Cervix	3.18147e-13	1.12081e-12	7.42516e-14	1.71474e-13	2.07208e-12
572	45779	SMARCB1	HeLa-S3	Epithelium	Cervix	3.18147e-13	1.12081e-12	7.42516e-14	1.71474e-13	2.07208e-12
573	64761	POLR2AphosphoS5	None	Neuron	None	7.17061e-13	2.38297e-06	6.65791e-14	1.82798e-13	2.20506e-12
574	45980	MYC	MCF-7	Epithelium	Breast	1.80158e-12	2.36544e-05	6.42416e-14	1.86184e-13	2.242e-12
575	65197	KLF15	HEK293	Epithelium	Embryonic Kidney	7.08231e-13	9.40799e-09	6.99178e-14	1.91069e-13	2.29682e-12
576	46231	CREB1	HepG2	Epithelium	Liver	3.78021e-12	4.37333e-07	6.81816e-14	2.00784e-13	2.40941e-12
577	47601	KLF5	KATO III	None	Stomach	1.56491e-12	2.96433e-09	7.42083e-14	2.12608e-13	2.54687e-12
578	36842	FOXA1	MDA-MB-453	Epithelium	Mammary Gland	1.93827e-11	0.000617491	7.31393e-14	2.18658e-13	2.61482e-12
579	42708	ATF2	LoVo	None	Colon	1.11679e-12	1.14085e-12	8.68976e-14	2.25875e-13	2.69645e-12
580	37602	TCF12	ME-1	Leukemia Cell	None	1.56835e-11	2.21113e-09	7.60133e-14	2.26874e-13	2.70371e-12
581	43572	RNF2	None	Fibroblast	Foreskin	6.99863e-12	9.45392e-14	4.77856e-13	2.34257e-13	2.78606e-12
582	56052	CREB1	HepG2	Epithelium	Liver	1.37439e-12	3.51928e-09	8.29347e-14	2.3459e-13	2.78606e-12
583	62932	BCL3	A549	Epithelium	Lung	2.56521e-12	3.33734e-11	8.19778e-14	2.3781e-13	2.81945e-12
584	36231	DCP1A	HeLa	Epithelium	Cervix	8.11351e-13	1.30312e-13	2.79341e-13	2.40252e-13	2.84353e-12
585	55665	PAF1	HCT-116	None	Colon	1.95668e-12	9.81315e-14	6.17863e-13	2.43638e-13	2.87868e-12
586	69773	BRD4	MV4;11	Leukemia Cell	Blood	2.78681e-10	3.51179e-07	8.20003e-14	2.4597e-13	2.90127e-12
587	45638	CHD2	GM12878	B Lymphocyte	Blood	4.01727e-12	3.31508e-13	1.17221e-13	2.54352e-13	2.99503e-12
588	49494	CDK7	Jurkat	T Lymphocyte	Blood	7.47128e-13	6.64904e-12	1.07098e-13	2.77056e-13	3.25682e-12
589	43099	RUNX1	CUTLL1	T Lymphocyte	Blood	1.37387e-12	9.55883e-11	9.99578e-14	2.79443e-13	3.27931e-12
590	45890	HCFC1	K562	Erythroblast	Bone Marrow	2.35442e-12	4.23279e-11	9.8779e-14	2.83717e-13	3.32382e-12
591	63002	BCL3	A549	Epithelium	Lung	1.53682e-12	1.42688e-11	1.03886e-13	2.89879e-13	3.39026e-12
592	45903	RCOR1	K562	Erythroblast	Bone Marrow	2.53735e-09	2.03822e-05	9.90015e-14	2.96874e-13	3.4662e-12
593	37354	JUN	A549	Epithelium	Lung	4.82992e-12	4.33971e-10	1.03743e-13	3.04701e-13	3.55159e-12
594	33194	MAX	P493-6	B cell lymphoma	None	3.96404e-11	1.52858e-09	1.03906e-13	3.10918e-13	3.61795e-12
595	33162	MAX	P493-6	B cell lymphoma	None	9.41252e-12	2.05509e-09	1.05534e-13	3.13083e-13	3.63702e-12
596	8107	MYC	HepG2	Epithelium	Liver	4.26557e-13	4.51667e-13	2.05684e-13	3.18467e-13	3.69337e-12
597	77300	TRIM25	BT-549	None	Breast	4.06816e-13	3.31999e-05	1.44052e-13	3.19189e-13	3.69554e-12
598	73506	BRD4	SUM159PT	mammary carcinoma cell line	Breast	1.39838e-12	4.7593e-11	1.18737e-13	3.27571e-13	3.78624e-12
599	63295	ZNF335	HEK293	Epithelium	Embryonic Kidney	1.28052e-13	5.26815e-08	8.25624e-13	3.32623e-13	3.83821e-12
600	64555	IKZF2	HEK293	Epithelium	Embryonic Kidney	4.28941e-13	1.01183e-06	1.50363e-13	3.34122e-13	3.84587e-12
601	53630	STAT5B	None	T Lymphocyte	Blood	2.70273e-12	3.04778e-11	1.16694e-13	3.34399e-13	3.84587e-12
602	56047	CREB1	HepG2	Epithelium	Liver	1.59709e-11	1.42353e-05	1.15145e-13	3.43003e-13	3.93827e-12
603	46320	TAF1	MCF-7	Epithelium	Breast	1.29792e-12	5.72036e-13	1.63904e-13	3.47999e-13	3.98901e-12
604	75287	ZBTB48	HeLa	None	None	3.16665e-13	8.31252e-13	2.45174e-13	3.55493e-13	4.06816e-12
605	63884	BCL3	A549	Epithelium	Lung	3.12917e-12	1.11996e-12	1.45568e-13	3.71148e-13	4.24028e-12
606	68711	BRD4	IMR90	None	None	2.98309e-13	1.01522e-11	2.16887e-13	3.72202e-13	4.24532e-12
607	64868	SIN3A	K562	Erythroblast	Bone Marrow	1.52056e-12	2.52053e-13	2.98805e-13	3.76366e-13	4.28573e-12
608	39025	BRD4	U87	None	Brain	1.43811e-12	2.38864e-12	1.47488e-13	3.80085e-13	4.32096e-12
609	73515	BRD4	SUM159PT	mammary carcinoma cell line	Breast	1.20831e-12	8.68716e-10	1.41807e-13	3.80806e-13	4.32206e-12
610	57092	HEXIM1	HCT-116	None	Colon	1.84138e-12	2.85434e-05	1.43877e-13	4.00457e-13	4.53764e-12
611	55664	PAF1	HCT-116	None	Colon	7.62181e-12	3.68544e-12	1.45506e-13	4.12503e-13	4.66649e-12
612	46135	SP1	GM12878	B Lymphocyte	Blood	1.2719e-10	2.31051e-10	1.41838e-13	4.24827e-13	4.79804e-12
613	9508	TFAP2C	BT-474	Epithelium	Mammary Gland	2.37294e-11	0.0286277	1.44931e-13	4.32265e-13	4.86865e-12
614	46104	YY1	ECC-1	Epithelium	Endometrium	1.90324e-12	2.32329e-10	1.56035e-13	4.32487e-13	4.86865e-12
615	74681	SMAD4	HepG2	Epithelium	Liver	2.27411e-11	2.18182e-08	1.51432e-13	4.51417e-13	5.07348e-12
616	55895	T	None	Fibroblast	None	1.04213e-12	2.04495e-13	1.81478e-12	4.68681e-13	5.25896e-12
617	64914	BCL3	A549	Epithelium	Lung	6.32949e-12	1.34354e-11	1.72962e-13	4.98879e-13	5.58838e-12
618	46025	GATA1	PBDE	Erythroblast	Blood	2.06483e-11	1.79395e-13	2.61784e-12	4.99656e-13	5.58838e-12
619	77486	KMT2A	MV4-11	Leukemia Cell	None	1.85662e-12	7.42839e-05	1.94971e-13	5.29243e-13	5.90974e-12
620	1873	RB1	IMR90	Fibroblast	Lung	3.38923e-13	7.86069e-13	7.08683e-13	5.32574e-13	5.93734e-12
621	67829	BRD4	SUM159R	None	None	4.2785e-11	3.13444e-13	4.29532e-13	5.41345e-13	6.0254e-12
622	71069	MBD3	HeLa	Epithelium	Cervix	1.28958e-12	1.12355e-09	2.19824e-13	5.63327e-13	6.26e-12
623	74342	NEUROD1	D283 Med	None	None	1.01396e-12	6.4143e-10	2.32314e-13	5.66935e-13	6.28998e-12
624	47329	FOXA1	DU145	Epithelium	Prostate	1.02252e-11	1.9588e-13	4.3395e-10	5.76539e-13	6.38628e-12
625	50892	RELA	None	None	None	1.04886e-12	2.76161e-12	2.60738e-13	5.82479e-13	6.44175e-12
626	47411	GABPA	VCaP	Epithelium	Prostate	7.37285e-13	7.76494e-12	2.74504e-13	5.85088e-13	6.46026e-12
627	37619	RUNX1	ME-1	Leukemia Cell	None	5.66818e-11	2.79662e-06	1.99211e-13	5.9569e-13	6.56684e-12
628	73525	BRD4	SUM159PT	mammary carcinoma cell line	Breast	9.18309e-12	3.78615e-09	2.08421e-13	6.11455e-13	6.7299e-12
629	35309	FLI1	SKNO-1	Myeloblast	Bone Marrow	2.4078e-10	0.000106927	2.38179e-13	7.13929e-13	7.84527e-12
630	46163	YY1	GM12892	Lymphoblastoid	Blood	9.2761e-12	1.26557e-11	2.49861e-13	7.16205e-13	7.85779e-12
631	71136	BRD4	MCF-10A	Epithelium	None	4.53143e-13	6.44706e-12	5.5902e-13	7.22755e-13	7.91709e-12
632	43051	BRD3	MM1.S	B Lymphocyte	Blood	3.11055e-12	3.53379e-13	1.04394e-12	7.30138e-13	7.98531e-12
633	46295	ZBTB7A	K562	Erythroblast	Bone Marrow	3.48569e-11	3.83696e-06	2.52427e-13	7.51788e-13	8.20909e-12
634	56048	CREB1	HepG2	Epithelium	Liver	1.27166e-12	9.30409e-11	3.22306e-13	7.69274e-13	8.38678e-12
635	64867	SIN3A	K562	Erythroblast	Bone Marrow	9.83649e-13	2.18143e-12	4.14585e-13	7.71772e-13	8.40076e-12
636	46136	GABPA	GM12878	B Lymphocyte	Blood	4.86196e-12	4.58724e-13	7.52964e-13	8.07854e-13	8.77969e-12
637	63813	L3MBTL2	K562	Erythroblast	Bone Marrow	2.87347e-12	8.57871e-09	3.06569e-13	8.31113e-13	9.01829e-12
638	57169	CDK8	MOLM-14	Myeloid Cell	None	3.33598e-11	1.59145e-09	2.86084e-13	8.5093e-13	9.20264e-12
639	37604	CBFB	ME-1	Leukemia Cell	None	1.73923e-12	0.00117973	3.3926e-13	8.51708e-13	9.20264e-12
640	8660	HDAC2	VCaP	Epithelium	Prostate	3.7389e-13	1.38402e-11	1.29207e-12	8.52096e-13	9.20264e-12
641	37597	HDAC1	ME-1	Leukemia Cell	None	1.55438e-11	4.71923e-09	2.91728e-13	8.5898e-13	9.26251e-12
642	46177	E2F6	H1	Embryonic Stem Cell	Embryo	1.13465e-12	0.000330482	3.93218e-13	8.76132e-13	9.43275e-12
643	33180	MYC	H128	Epithelium	Lung	1.53263e-12	2.35489e-12	4.302e-13	8.82017e-13	9.48134e-12
644	56050	CREB1	HepG2	Epithelium	Liver	4.20661e-12	2.64349e-09	3.29588e-13	9.16822e-13	9.84018e-12
645	58316	MED1	LNCaP-abl	Epithelium	Prostate	1.22498e-12	6.02408e-13	1.51628e-12	9.56624e-13	1.02514e-11
646	42722	HOXA6	LoVo	None	Colon	7.38792e-13	3.47148e-11	5.99135e-13	9.83158e-13	1.05195e-11
647	35878	BRD2	HEK293	Epithelium	Embryonic Kidney	5.42933e-13	4.13706e-08	8.83218e-13	1.00875e-12	1.07766e-11
648	42720	HOXA4	LoVo	None	Colon	8.3323e-13	1.59862e-11	6.25398e-13	1.04833e-12	1.11822e-11
649	74207	BRD4	SF8628	None	Pontine	2.28399e-12	1.24175e-12	6.34016e-13	1.06365e-12	1.13281e-11
650	64039	HBP1	HepG2	Epithelium	Liver	2.05897e-12	1.98257e-12	5.91691e-13	1.11944e-12	1.19039e-11
651	38489	RB1	IMR90	Fibroblast	Lung	1.09913e-12	1.20545e-12	1.14881e-12	1.14952e-12	1.22051e-11
652	56821	TFAP2A	None	Neural crest cell	Cranial	1.8701e-11	0.0136299	3.93886e-13	1.15735e-12	1.22694e-11
653	75275	ZBTB48	U2OS	None	None	3.35954e-12	7.73678e-10	4.48431e-13	1.18622e-12	1.25533e-11
654	52555	SMARCA4	501-Mel	Melanoma Cell	None	5.02856e-12	4.50214e-12	4.75114e-13	1.18777e-12	1.25533e-11
655	71933	MYC	U2OS	None	Bone	6.02089e-12	1.29303e-11	4.58539e-13	1.2374e-12	1.30579e-11
656	35011	FOXM1	MDA-MB-231	Epithelium	Breast	4.84103e-12	9.44211e-13	9.55885e-13	1.29774e-12	1.36737e-11
657	58083	KDM2B	None	Stem cell	Blood	2.5121e-12	1.50878e-06	5.45143e-13	1.34381e-12	1.41377e-11
658	74308	CDK9	MV4;11	Acute myeloid leukemia	None	3.28807e-10	1.13881e-08	4.60792e-13	1.38051e-12	1.45016e-11
659	45788	MAZ	HepG2	Epithelium	Liver	1.97868e-11	3.41319e-10	4.80068e-13	1.40415e-12	1.47276e-11
660	58843	XRN2	HEK293	Epithelium	Embryonic Kidney	3.18538e-12	4.51837e-12	6.35268e-13	1.4222e-12	1.48943e-11
661	45629	ZNF143	GM12878	B Lymphocyte	Blood	9.98903e-10	7.84103e-08	4.89729e-13	1.46849e-12	1.53558e-11
662	42638	CREBBP	HEK293	Epithelium	Embryonic Kidney	2.62185e-12	1.96997e-06	6.18235e-13	1.5008e-12	1.56579e-11
663	50372	SUZ12	None	Proerythroblast	Fetal Liver	5.26162e-12	3.11796e-12	6.72619e-13	1.50191e-12	1.56579e-11
664	73710	KMT2A	None	None	Spleen	1.02036e-11	1.11721e-09	5.32686e-13	1.51817e-12	1.58036e-11
665	46333	FOXP2	PFSK-1	Neuron	Brain	1.55586e-12	2.72267e-09	7.89676e-13	1.57119e-12	1.63309e-11
666	45639	SIN3A	GM12878	B Lymphocyte	Blood	6.61126e-12	1.64959e-12	9.64838e-13	1.67233e-12	1.73561e-11
667	67715	CREB1	LNCaP	Epithelium	Prostate	2.95177e-12	2.37189e-11	7.22974e-13	1.70058e-12	1.76228e-11
668	36819	ESR1	MCF-7	Epithelium	Breast	2.09444e-12	7.79968e-07	7.93268e-13	1.72601e-12	1.78595e-11
669	1958	BCL6	JURL_MK1	Haematopoietic Progenitor Cell	Bone Marrow	4.71684e-11	3.9875e-09	5.86261e-13	1.737e-12	1.79464e-11
670	47487	MYC	U2OS	None	Bone	4.49709e-11	2.50875e-11	6.15512e-13	1.77852e-12	1.8348e-11
671	46214	EGR1	HCT-116	None	Colon	8.16042e-11	2.08927e-08	6.21774e-13	1.85113e-12	1.90686e-11
672	1938	ETS1	Jurkat E6-1	T Lymphocyte	Blood	1.06057e-12	4.54397e-11	1.75235e-12	1.95366e-12	2.00948e-11
673	57171	CDK8	MOLM-14	Myeloid Cell	None	7.02288e-12	1.88961e-11	7.48401e-13	1.95893e-12	2.01191e-11
674	64738	ZBTB33	K562	Erythroblast	Bone Marrow	3.46176e-09	6.57185e-13	8.0198e-08	1.97115e-12	2.02145e-11
675	42901	RELA	AC16	Cardiomyocyte	None	1.0006e-12	3.7644e-12	4.37498e-12	2.00856e-12	2.05677e-11
676	74350	OTX2	D-341	None	None	8.30571e-13	1.18993e-11	6.96334e-12	2.09549e-12	2.1395e-11
677	57177	BRD4	MOLM-14	Myeloid Cell	None	8.41031e-12	1.28925e-10	7.66321e-13	2.09555e-12	2.1395e-11
678	43633	BRD4	OCI-Ly1	B cell lymphoma	Bone Marrow	3.65393e-11	7.41645e-12	8.12296e-13	2.15322e-12	2.19514e-11
679	50516	NIPBL	Ramos	B Lymphocyte	None	3.21284e-10	7.6951e-13	1.03509e-10	2.28606e-12	2.32714e-11
680	62934	BCL3	A549	Epithelium	Lung	1.11211e-11	1.83657e-11	8.8324e-13	2.35001e-12	2.38872e-11
681	53323	INTS3	HeLa	Epithelium	Cervix	2.11895e-11	9.5765e-13	1.09951e-11	2.53725e-12	2.57525e-11
682	57167	CDK8	MOLM-14	Myeloid Cell	None	1.66875e-09	5.43356e-07	8.5037e-13	2.54996e-12	2.58069e-11
683	73524	BRD4	SUM159PT	mammary carcinoma cell line	Breast	4.40341e-10	8.06283e-09	8.51781e-13	2.55007e-12	2.58069e-11
684	33168	MYC	P493-6	B cell lymphoma	None	1.07798e-11	2.33854e-12	1.56623e-12	2.58876e-12	2.61601e-11
685	52091	TP53	IMR90	Fibroblast	Lung	7.07489e-12	3.3819e-12	1.40473e-12	2.61119e-12	2.63482e-11
686	42212	STAT3	OCI-Ly10	B Lymphocyte	Bone Marrow	1.75863e-11	1.80125e-12	1.96456e-12	2.67603e-12	2.69631e-11
687	46307	PML	MCF-7	Epithelium	Breast	5.29017e-11	1.05353e-12	7.35781e-12	2.71749e-12	2.73411e-11
688	45662	RELA	GM12891	Lymphoblastoid	Blood	1.4415e-10	4.62289e-10	9.15363e-13	2.72349e-12	2.73616e-11
689	45775	STAT1	HeLa-S3	Epithelium	Cervix	3.44506e-11	3.10255e-10	9.40782e-13	2.73936e-12	2.74811e-11
690	49652	MED1	MCF-7	Epithelium	Breast	1.68681e-11	4.35709e-10	9.80739e-13	2.77472e-12	2.77955e-11
691	65147	EGR2	HEK293	Epithelium	Embryonic Kidney	4.61348e-12	7.21252e-07	1.16578e-12	2.79188e-12	2.79269e-11
692	34399	MECP2	HCT-116	None	Colon	1.01894e-11	5.92711e-12	1.24953e-12	2.81125e-12	2.808e-11
693	46158	PAX5	GM12891	Lymphoblastoid	Blood	2.65053e-11	1.43774e-12	3.41855e-12	2.92461e-12	2.91701e-11
694	9320	NIPBL	LCL	Lymphoblastoid	Blood	1.2873e-11	4.2191e-12	1.43689e-12	2.96846e-12	2.95648e-11
695	45926	MAX	K562	Erythroblast	Bone Marrow	3.84426e-12	7.53078e-11	1.37133e-12	2.99211e-12	2.97575e-11
696	62931	ZNF341	HEK293	Epithelium	Embryonic Kidney	1.34837e-12	7.49661e-10	3.97881e-12	3.01714e-12	2.99633e-11
697	63097	SMAD5	GM12878	B Lymphocyte	Blood	6.98561e-12	4.14037e-12	1.64681e-12	3.02447e-12	2.9993e-11
698	56820	TFAP2A	None	Neural crest cell	Cranial	2.20541e-11	0.00853413	1.07816e-12	3.0837e-12	3.05366e-11
699	46298	EGR1	K562	Erythroblast	Bone Marrow	2.13892e-10	1.10651e-05	1.04669e-12	3.12478e-12	3.08991e-11
700	46355	ELF1	SK-N-SH	Neuroblastoma cell	Brain	4.0772e-11	1.32346e-12	5.71621e-12	3.14121e-12	3.10172e-11
701	50397	MYB	Jurkat	T Lymphocyte	Blood	1.93708e-11	1.33714e-10	1.14601e-12	3.22009e-12	3.17476e-11
702	49778	CHD8	None	iPSC	None	7.92964e-12	2.22838e-12	2.81257e-12	3.22437e-12	3.17476e-11
703	42715	GLI2	LoVo	None	Colon	4.67512e-12	7.17101e-11	1.53459e-12	3.4111e-12	3.35385e-11
704	42940	MYC	GP5d	None	Colon	3.8844e-12	3.40924e-12	3.26551e-12	3.50059e-12	3.43694e-11
705	74347	NEUROD1	D-341	None	None	1.40032e-11	2.88702e-12	2.39191e-12	3.58907e-12	3.51882e-11
706	75281	ZBTB48	HeLa	None	None	2.30522e-12	3.12075e-09	2.6768e-12	3.71425e-12	3.63504e-11
707	46138	PAX5	GM12878	B Lymphocyte	Blood	1.2666e-10	4.04033e-09	1.25201e-12	3.71814e-12	3.63504e-11
708	36362	GTF2B	IMR90	Fibroblast	Lung	1.62179e-11	2.84282e-12	2.72309e-12	3.84298e-12	3.75179e-11
709	5574	GATA1	None	Erythroblast	Blood	6.04306e-10	1.37042e-12	2.0741e-10	4.07507e-12	3.97277e-11
710	45730	RFX5	HeLa-S3	Epithelium	Cervix	4.90365e-11	1.25774e-10	1.43006e-12	4.12304e-12	4.01386e-11
711	73523	BRD4	SUM159PT	mammary carcinoma cell line	Breast	2.43951e-10	3.15874e-09	1.40133e-12	4.17827e-12	4.05631e-11
712	45753	TFAP2A	HeLa-S3	Epithelium	Cervix	1.35322e-11	1.32036e-10	1.57107e-12	4.17838e-12	4.05631e-11
713	55666	PAF1	HCT-116	None	Colon	2.32327e-11	1.9896e-12	6.04502e-12	4.21896e-12	4.08996e-11
714	71137	BRD4	MCF-10A	Epithelium	None	5.22358e-12	4.05756e-12	3.70986e-12	4.24066e-12	4.10525e-11
715	69812	NELFE	MCF-7	Human Breast Cancer Cell	Breast	1.44554e-11	2.46482e-12	4.50676e-12	4.30556e-12	4.16224e-11
716	74907	POLR3D	THP-1	Macrophage	None	1.42374e-10	0.00774585	1.56734e-12	4.65095e-12	4.48985e-11
717	46344	GABPA	SK-N-SH	Neuroblastoma cell	Brain	7.11985e-11	1.80368e-12	1.75439e-11	4.79644e-12	4.62385e-11
718	76856	ZMYND8	HEK293	None	Kidney	2.30721e-12	2.19159e-11	6.88261e-12	4.8051e-12	4.62575e-11
719	74682	FOXO3	HepG2	Epithelium	Liver	2.53002e-11	7.57885e-08	1.72163e-12	4.83563e-12	4.64866e-11
720	63430	YY1	None	None	Liver	4.29482e-11	7.91224e-06	1.69966e-12	4.90474e-12	4.70855e-11
721	8092	MYC	GM12878	B Lymphocyte	Blood	2.63854e-11	3.56136e-12	3.85612e-12	5.19018e-12	4.97566e-11
722	62610	H2AFZ	MCF-7	Epithelium	Breast	3.98839e-12	7.01473e-09	3.09531e-12	5.22704e-12	5.00406e-11
723	53299	SPI1	TSU-1621-MT	None	None	3.36767e-11	3.83297e-09	1.85985e-12	5.28516e-12	5.0527e-11
724	69818	NELFE	MCF-7	Human Breast Cancer Cell	Breast	1.36013e-11	6.07401e-12	3.22194e-12	5.46913e-12	5.22135e-11
725	72354	HDAC1	Kasumi-1	Acute myeloid leukemia	None	1.71706e-10	1.50765e-08	1.93483e-12	5.73913e-12	5.47157e-11
726	48998	AFF4	HeLa	Epithelium	Cervix	1.32503e-11	3.52417e-12	6.41123e-12	5.82301e-12	5.54389e-11
727	62840	SP3	HEK293	Epithelium	Embryonic Kidney	1.15201e-11	1.39542e-08	2.40699e-12	5.97211e-12	5.6755e-11
728	52170	PRDM11	U-2932	B Lymphocyte	None	1.32633e-11	4.98066e-12	4.43075e-12	5.97766e-12	5.6755e-11
729	46034	NRF1	SK-N-SH	Neuroblastoma cell	Brain	6.11675e-12	1.91305e-11	3.51266e-12	5.99465e-12	5.68382e-11
730	53671	NIPBL	None	Embryonic Stem Cell	None	3.68757e-12	1.90636e-11	6.01103e-12	6.12244e-12	5.79702e-11
731	36228	XRN2	HEK293	Epithelium	Embryonic Kidney	7.30645e-12	9.67436e-12	4.07179e-12	6.17506e-12	5.83885e-11
732	53302	T	TSU-1621-MT	None	None	6.00886e-12	3.33913e-06	3.14738e-12	6.19649e-12	5.85111e-11
733	46358	PBX3	SK-N-SH	Neuroblastoma cell	Brain	1.17244e-11	9.71552e-10	2.52504e-12	6.21947e-12	5.8648e-11
734	45770	TFAP2C	HeLa-S3	Epithelium	Cervix	6.41228e-12	1.77723e-09	3.29614e-12	6.52317e-12	6.1428e-11
735	64559	SP2	HEK293	Epithelium	Embryonic Kidney	6.98409e-12	1.9583e-08	3.50678e-12	7.00279e-12	6.58548e-11
736	64038	HBP1	HepG2	Epithelium	Liver	5.44852e-12	3.53392e-10	4.22548e-12	7.09177e-12	6.6601e-11
737	56958	GTF2B	HeLa	Epithelium	Cervix	1.0791e-11	5.16681e-12	7.64271e-12	7.1933e-12	6.74628e-11
738	75282	ZBTB48	HeLa	None	None	3.7654e-12	1.30777e-10	7.69512e-12	7.44088e-12	6.96902e-11
739	73508	BRD4	SUM159PT	mammary carcinoma cell line	Breast	2.93517e-11	1.35255e-11	3.45537e-12	7.54885e-12	7.06058e-11
740	35002	FOXM1	MCF-7	Epithelium	Breast	2.50845e-11	1.24309e-11	3.72137e-12	7.71155e-12	7.20301e-11
741	67806	BRD4	HCC1395	None	None	2.40008e-11	3.14508e-11	3.40277e-12	8.16691e-12	7.61804e-11
742	68871	FOXA1	MCF-7	Embryonic Stem Cell	Breast	1.11341e-10	1.21466e-08	2.81095e-12	8.22342e-12	7.66042e-11
743	36804	NR2F2	MCF-7	Epithelium	Breast	7.95642e-11	8.08906e-05	2.9113e-12	8.42559e-12	7.83818e-11
744	42798	RAD21	LoVo	None	Colon	2.15629e-10	4.3643e-08	2.88376e-12	8.53662e-12	7.93079e-11
745	45228	KDM4A	H1	Embryonic Stem Cell	Embryo	1.19011e-11	8.94232e-05	3.95504e-12	8.9056e-12	8.25141e-11
746	8816	KDM4A	H1	Embryonic Stem Cell	Embryo	1.19011e-11	8.94232e-05	3.95504e-12	8.9056e-12	8.25141e-11
747	55721	SUMO2	VCaP	Epithelium	Prostate	8.76982e-11	9.28041e-06	3.08634e-12	8.94429e-12	8.27616e-11
748	38658	SOX2	LoVo	None	Colon	1.14123e-11	2.79434e-11	4.73306e-12	8.96344e-12	8.28279e-11
749	47265	KDM5B	MCF-7	Epithelium	Breast	3.26764e-10	1.12004e-06	3.18219e-12	9.45444e-12	8.72484e-11
750	76995	GLI2	THP-1	None	None	8.5551e-12	6.80538e-11	5.65373e-12	9.72583e-12	8.96333e-11
751	49446	HIF1A	T47D	Epithelium	Mammary Gland	4.89465e-09	0.0722948	3.33857e-12	1.00088e-11	9.2118e-11
752	4610	TAL1	None	Proerythroblast	Bone Marrow	1.1201e-11	4.31176e-11	5.52481e-12	1.02225e-11	9.39599e-11
753	46148	SRF	GM12878	B Lymphocyte	Blood	2.06234e-10	5.43285e-11	3.73958e-12	1.03211e-11	9.47406e-11
754	45769	NFYA	HeLa-S3	Epithelium	Cervix	5.36827e-11	2.87022e-11	4.24168e-12	1.03726e-11	9.50867e-11
755	64581	CBX1	HepG2	Epithelium	Liver	3.77372e-11	1.62956e-09	3.93774e-12	1.06737e-11	9.77177e-11
756	46286	REST	K562	Erythroblast	Bone Marrow	2.29071e-10	1.71296e-07	3.62133e-12	1.06947e-11	9.77798e-11
757	46143	PML	GM12878	B Lymphocyte	Blood	7.72853e-11	2.25808e-11	4.55936e-12	1.08478e-11	9.90491e-11
758	8770	CHD1	K562	Erythroblast	Bone Marrow	2.41234e-11	5.40301e-12	2.25034e-11	1.10711e-11	1.00955e-10
759	75273	ZBTB48	U2OS	None	None	3.48042e-11	1.33474e-09	4.31138e-12	1.14757e-11	1.04506e-10
760	63814	L3MBTL2	K562	Erythroblast	Bone Marrow	6.3093e-10	9.64859e-06	4.09344e-12	1.22012e-11	1.10967e-10
761	38824	MNT	LoVo	None	Colon	2.89901e-11	2.55716e-11	5.94142e-12	1.24012e-11	1.12638e-10
762	65214	GLIS1	HEK293	Epithelium	Embryonic Kidney	2.34264e-10	0.000260435	4.23698e-12	1.24852e-11	1.13252e-10
763	46182	CREB1	H1	Embryonic Stem Cell	Embryo	4.79704e-11	8.32104e-07	4.61057e-12	1.2619e-11	1.14315e-10
764	56054	ATF1	HepG2	Epithelium	Liver	1.80142e-10	6.2737e-07	4.50447e-12	1.31836e-11	1.19274e-10
765	45699	SIN3A	H1	Embryonic Stem Cell	Embryo	1.78401e-11	1.11004e-06	5.96575e-12	1.34121e-11	1.21182e-10
766	43083	CDK9	HEK293T	Epithelium	Embryonic Kidney	3.07411e-11	9.9437e-12	1.22377e-11	1.39658e-11	1.26021e-10
767	50571	MYB	Jurkat	T Lymphocyte	Blood	6.23498e-11	1.32724e-09	5.14523e-12	1.42081e-11	1.28039e-10
768	71041	ZNF143	MCF-7	MCF 7 Cells	None	5.18092e-11	5.84033e-09	5.67511e-12	1.53311e-11	1.3798e-10
769	65115	MAZ	HEK293	Epithelium	Embryonic Kidney	3.58398e-11	7.82085e-07	6.11252e-12	1.56657e-11	1.40808e-10
770	40215	IRF4	None	B Lymphocyte	Blood	3.48589e-09	8.83661e-08	5.2514e-12	1.57295e-11	1.41198e-10
771	71039	ZNF143	MCF-7	MCF 7 Cells	None	7.14223e-11	2.14268e-09	5.95855e-12	1.64571e-11	1.47537e-10
772	73719	BRD4	SEM	B Lymphocyte	None	2.0553e-11	1.94368e-11	1.27544e-11	1.68061e-11	1.50471e-10
773	9230	CBX3	HCT-116	None	Colon	3.08369e-10	5.74815e-12	1.11201e-09	1.68435e-11	1.50611e-10
774	64689	H2AFZ	DOHH-2	None	None	6.05643e-11	4.86803e-11	7.44594e-12	1.75076e-11	1.56347e-10
775	46124	USF1	GM12878	B Lymphocyte	Blood	1.17626e-11	9.72137e-10	1.1871e-11	1.76177e-11	1.57127e-10
776	2094	NFYA	K562	Erythroblast	Bone Marrow	1.68938e-10	7.04054e-09	6.10665e-12	1.76661e-11	1.57356e-10
777	37639	ERG	K562	Erythroblast	Bone Marrow	1.22071e-10	9.7311e-08	6.39735e-12	1.82351e-11	1.62215e-10
778	62715	TFAP4	HepG2	Epithelium	Liver	7.08785e-11	3.97814e-07	7.29096e-12	1.98325e-11	1.76198e-10
779	44028	BRCA1	MCF-10A	Epithelium	Breast	8.34392e-11	1.40379e-11	1.4874e-11	1.99399e-11	1.76925e-10
780	69875	RELA	None	Th1	None	6.11735e-11	1.07541e-10	8.15479e-12	2.0233e-11	1.79295e-10
781	9510	TFAP2C	SKBR-3	None	Mammary Gland	5.97086e-10	0.0229503	6.91975e-12	2.05215e-11	1.81619e-10
782	45984	CTCF	MCF-7	Epithelium	Breast	1.05867e-09	0.00291913	7.08387e-12	2.11104e-11	1.86592e-10
783	38784	RFX1	LoVo	None	Colon	5.30442e-11	3.01938e-11	1.19067e-11	2.20657e-11	1.94787e-10
784	62800	KLF9	MCF-7	Epithelium	Breast	5.05916e-11	1.54045e-09	8.72773e-12	2.22234e-11	1.95929e-10
785	36841	TCF7L2	MDA-MB-453	Epithelium	Mammary Gland	3.53906e-10	1.05473e-09	7.77449e-12	2.26587e-11	1.99512e-10
786	42744	RELA	LoVo	None	Colon	1.58154e-11	3.87113e-10	1.50708e-11	2.26987e-11	1.9961e-10
787	63410	CBX5	GM12878	B Lymphocyte	Blood	3.25316e-10	4.2937e-10	8.20193e-12	2.35618e-11	2.06936e-10
788	46359	REST	SK-N-SH	Neuroblastoma cell	Brain	1.14848e-10	3.24618e-10	8.90274e-12	2.41717e-11	2.12024e-10
789	45878	GTF2F1	K562	Erythroblast	Bone Marrow	3.72772e-11	1.50385e-11	3.39084e-11	2.44273e-11	2.13994e-10
790	69814	NELFE	MCF-7	Human Breast Cancer Cell	Breast	6.46845e-11	1.71919e-11	2.29745e-11	2.56075e-11	2.2405e-10
791	76857	ZMYND8	HEK293	None	Kidney	1.21827e-11	1.05236e-09	3.15659e-11	2.61521e-11	2.28525e-10
792	46211	SRF	HCT-116	None	Colon	6.18975e-10	9.32439e-09	8.88998e-12	2.62677e-11	2.29245e-10
793	8106	MYC	HepG2	Epithelium	Liver	1.64724e-11	3.56416e-11	4.21154e-11	2.66645e-11	2.32127e-10
794	8091	MYC	GM12878	B Lymphocyte	Blood	9.64253e-11	1.75069e-11	2.22142e-11	2.6665e-11	2.32127e-10
795	34568	RUNX1	SEM	Pre-B Lymphocyte	None	5.36229e-09	1.50137e-06	8.93169e-12	2.67504e-11	2.3254e-10
796	64102	BCL3	A549	Epithelium	Lung	8.83706e-11	7.96088e-10	1.0055e-11	2.67798e-11	2.3254e-10
797	46337	REST	PFSK-1	Neuron	Brain	3.28666e-11	4.19876e-08	1.23899e-11	2.69879e-11	2.34053e-10
798	45880	JUND	K562	Erythroblast	Bone Marrow	1.75775e-08	1.9194e-05	9.22545e-12	2.76619e-11	2.39598e-10
799	46209	CBX3	HCT-116	None	Colon	2.47174e-09	1.61409e-05	9.30902e-12	2.78222e-11	2.40685e-10
800	70815	SP1	HCT-116	Colon cancer cell	Colon	1.69599e-10	3.74081e-05	9.9547e-12	2.82085e-11	2.43721e-10
801	46234	SP1	HepG2	Epithelium	Liver	2.92267e-10	1.85794e-06	9.91146e-12	2.8759e-11	2.48168e-10
802	57165	CDK8	MOLM-14	Myeloid Cell	None	5.15277e-09	6.85508e-07	9.81516e-12	2.9389e-11	2.53288e-10
803	74360	NEUROD1	D283 Med	None	None	3.40111e-11	1.7443e-10	1.5114e-11	2.96154e-11	2.54921e-10
804	73509	BRD4	SUM159PT	mammary carcinoma cell line	Breast	3.82225e-10	1.32797e-08	1.02751e-11	2.99957e-11	2.57874e-10
805	69617	BRD4	Jurkat	T Lymphocyte	Blood	4.6711e-11	4.03687e-09	1.28968e-11	3.02436e-11	2.59682e-10
806	48779	MYC	P493-6	B cell lymphoma	None	1.32664e-10	1.32812e-11	6.25668e-11	3.03597e-11	2.60355e-10
807	46364	YY1	SK-N-SH_RA	Neuron	Brain	7.97562e-11	1.64673e-09	1.18701e-11	3.08038e-11	2.63836e-10
808	62486	YY1	None	None	Liver	2.3759e-10	7.12384e-09	1.08753e-11	3.11525e-11	2.66492e-10
809	55555	SPI1	None	B Lymphocyte	None	7.88911e-10	6.12709e-11	1.28191e-11	3.13817e-11	2.68122e-10
810	46361	GATA3	SK-N-SH	Neuroblastoma cell	Brain	1.80935e-11	5.51057e-11	6.34807e-11	3.36443e-11	2.87098e-10
811	72337	MYC	None	Glioblastoma Stem Cell	None	1.6804e-10	1.9445e-11	3.44079e-11	3.47057e-11	2.9579e-10
812	8458	GATA1	K562	Erythroblast	Bone Marrow	2.96934e-11	3.08759e-09	1.9838e-11	3.5541e-11	3.02536e-10
813	76469	PHF2	None	Mesenchymal Cell	None	6.7726e-11	2.08645e-11	4.8672e-11	3.60406e-11	3.06412e-10
814	46044	CTCF	None	None	Spleen	9.74437e-09	4.17352e-07	1.21283e-11	3.63387e-11	3.08567e-10
815	35854	CTCF	GM12891	Lymphoblastoid	Blood	3.39901e-09	0.000181994	1.22863e-11	3.67263e-11	3.11475e-10
816	42217	STAT3	SU-DHL2	B Lymphocyte	None	4.06976e-11	8.73429e-11	2.2436e-11	3.72247e-11	3.15315e-10
817	45780	MYC	HeLa-S3	Epithelium	Cervix	8.2258e-11	1.88211e-11	7.65982e-11	3.82928e-11	3.23965e-10
818	53672	NIPBL	None	Embryonic Stem Cell	None	3.48876e-11	2.29992e-09	2.0958e-11	3.9056e-11	3.30019e-10
819	50152	ARRB1	C4-2	Epithelium	None	3.64752e-11	3.25719e-10	2.19607e-11	3.94623e-11	3.33045e-10
820	64107	KDM4B	K562	Erythroblast	Bone Marrow	1.08278e-10	8.35033e-11	2.13543e-11	4.40917e-11	3.71661e-10
821	38488	RBL2	IMR90	Fibroblast	Lung	2.82268e-11	8.79889e-11	5.00986e-11	4.49418e-11	3.78365e-10
822	56264	AR	CWR22Pc	Epithelium	Prostate	3.89796e-11	5.31496e-07	2.50007e-11	4.56933e-11	3.83916e-10
823	65179	EGR2	HEK293	Epithelium	Embryonic Kidney	7.15334e-11	7.8222e-06	1.93617e-11	4.57123e-11	3.83916e-10
824	72878	MYF5	Rh18	rhabdomyosarcoma	None	1.86318e-10	6.69676e-11	2.26759e-11	4.65842e-11	3.90765e-10
825	69878	CDK9	None	Th2	None	5.06597e-10	9.0528e-10	1.64315e-11	4.69209e-11	3.93112e-10
826	65120	ZBTB26	HEK293	Epithelium	Embryonic Kidney	4.46251e-11	7.04609e-09	2.42935e-11	4.70853e-11	3.94012e-10
827	69767	BRD4	MV4;11	Leukemia Cell	Blood	1.28902e-07	1.9405e-06	1.61108e-11	4.83259e-11	4.03661e-10
828	63294	ZNF335	HEK293	Epithelium	Embryonic Kidney	4.74953e-11	1.99495e-06	2.43988e-11	4.83553e-11	4.03661e-10
829	58086	KDM2B	None	Myeloid Cell	None	4.84987e-11	3.66228e-08	2.44255e-11	4.87115e-11	4.06144e-10
830	50893	RELA	None	None	None	1.16788e-10	5.19129e-11	2.97687e-11	4.88458e-11	4.06773e-10
831	33545	GATA1	None	Proerythroblast	Bone Marrow	1.64781e-10	4.82921e-08	1.82124e-11	4.91827e-11	4.08594e-10
832	43446	GATA1	None	Proerythroblast	Bone Marrow	1.64781e-10	4.82921e-08	1.82124e-11	4.91827e-11	4.08594e-10
833	73513	BRD4	SUM159PT	mammary carcinoma cell line	Breast	1.62473e-09	2.49617e-08	1.67327e-11	4.96535e-11	4.12011e-10
834	40055	CDK7	None	B Lymphocyte	Blood	3.31825e-10	2.10395e-11	1.29648e-10	5.14965e-11	4.26791e-10
835	45961	UBTF	K562	Erythroblast	Bone Marrow	1.22177e-10	2.29201e-07	2.01133e-11	5.18067e-11	4.28848e-10
836	53305	RUNX1	TSU-1621-MT	None	None	7.10268e-08	4.72285e-06	1.74755e-11	5.24135e-11	4.33352e-10
837	45807	BHLHE40	HepG2	Epithelium	Liver	1.7971e-10	6.69434e-09	1.98471e-11	5.3477e-11	4.41453e-10
838	8807	CHD1	H1	Embryonic Stem Cell	Embryo	3.52863e-11	3.53157e-09	3.64564e-11	5.3521e-11	4.41453e-10
839	37334	CREB1	A549	Epithelium	Lung	2.82158e-10	8.70024e-11	2.465e-11	5.39511e-11	4.4447e-10
840	46347	USF1	SK-N-SH	Neuroblastoma cell	Brain	2.26871e-10	5.40759e-11	3.25506e-11	5.59475e-11	4.60368e-10
841	42775	NPAT	LoVo	None	Colon	1.16506e-10	1.26703e-10	2.72173e-11	5.63729e-11	4.63317e-10
842	45996	MYC	MCF-7	Epithelium	Breast	4.20256e-10	2.8879e-06	1.99351e-11	5.70965e-11	4.68707e-10
843	62933	BCL3	A549	Epithelium	Lung	2.38289e-10	6.76031e-11	3.03919e-11	5.7812e-11	4.74018e-10
844	71320	RAD21	HCT-116	Colon cancer cell	Colon	9.7514e-10	1.91563e-05	2.01116e-11	5.91155e-11	4.84131e-10
845	3038	CREBBP	None	T Lymphocyte	Blood	8.33629e-11	7.01825e-11	4.1198e-11	5.93856e-11	4.85767e-10
846	45789	CEBPB	HepG2	Epithelium	Liver	7.23213e-11	2.09021e-08	2.92566e-11	6.2428e-11	5.1005e-10
847	47550	MYC	P493-6	B cell lymphoma	None	9.358e-11	5.99175e-11	5.07355e-11	6.37136e-11	5.19939e-10
848	64901	MBD2	MCF-7	Epithelium	Breast	3.48352e-10	3.70975e-10	2.43778e-11	6.43955e-11	5.24884e-10
849	42895	XBP1	T47D	Epithelium	Mammary Gland	2.86472e-10	6.75839e-11	3.66986e-11	6.58817e-11	5.36366e-10
850	1226	TRRAP	HeLa	Epithelium	Cervix	2.46429e-10	6.04511e-11	4.29252e-11	6.83424e-11	5.55745e-10
851	8105	MYC	HepG2	Epithelium	Liver	1.05501e-10	4.57687e-10	3.27706e-11	7.1126e-11	5.77302e-10
852	9316	CTCF	BCBL1	B cell lymphoma	None	3.77116e-09	1.42328e-07	2.38743e-11	7.11605e-11	5.77302e-10
853	8564	TBL1X	HEK293T	Epithelium	Embryonic Kidney	2.36896e-10	5.23993e-08	2.66691e-11	7.18788e-11	5.82446e-10
854	5439	FLI1	EWS502	Small Round Tumor Cell	None	1.27786e-10	5.04667e-10	3.14431e-11	7.20971e-11	5.83531e-10
855	55717	SUMO2	VCaP	Epithelium	Prostate	1.02798e-10	1.49289e-06	3.1696e-11	7.26775e-11	5.8754e-10
856	63105	ATF1	HepG2	Epithelium	Liver	6.21e-11	4.12122e-10	4.41263e-11	7.28302e-11	5.88087e-10
857	43592	CDK7	Jurkat	T Lymphocyte	Blood	5.38347e-11	2.79254e-10	5.27472e-11	7.29665e-11	5.885e-10
858	75562	BRD4	None	None	Retina	9.93942e-11	4.1899e-08	3.23979e-11	7.32582e-11	5.90164e-10
859	73698	MED1	SEM	B Lymphocyte	None	1.60675e-10	8.40852e-11	4.57216e-11	7.50227e-11	6.03675e-10
860	73984	CD34	None	None	Thymus	2.57644e-10	4.91535e-10	2.95501e-11	7.54592e-11	6.06482e-10
861	64945	BHLHE40	IMR90	Fibroblast	Lung	4.6238e-10	2.9021e-11	4.2696e-10	7.69969e-11	6.18121e-10
862	74304	CDK9	MV4;11	Acute myeloid leukemia	None	3.98799e-09	2.60074e-07	2.61027e-11	7.77913e-11	6.23774e-10
863	48996	AFF4	HeLa	Epithelium	Cervix	1.85514e-10	2.08024e-10	3.58142e-11	7.87e-11	6.30329e-10
864	42727	JUN	LoVo	None	Colon	8.19606e-11	1.39211e-08	3.88184e-11	7.88772e-11	6.31017e-10
865	42637	CREBBP	HEK293	Epithelium	Embryonic Kidney	1.729e-10	2.60406e-07	3.11976e-11	7.92784e-11	6.33494e-10
866	64688	H2AFZ	DOHH-2	None	None	1.91463e-10	8.6134e-11	5.17609e-11	8.2982e-11	6.62323e-10
867	56962	GTF2B	HeLa	Epithelium	Cervix	1.91457e-10	1.35894e-10	4.42657e-11	8.52935e-11	6.79987e-10
868	62639	RNF2	K562	Erythroblast	Bone Marrow	7.96837e-10	6.64037e-09	3.1512e-11	9.05263e-11	7.20873e-10
869	47330	FOXA1	DU145	Epithelium	Prostate	6.75518e-08	3.15373e-11	2.86514e-07	9.45575e-11	7.52107e-10
870	56053	ATF1	HepG2	Epithelium	Liver	3.14104e-10	1.98301e-06	3.51047e-11	9.47259e-11	7.52581e-10
871	69879	CDK9	None	Th1	None	1.08902e-09	2.73915e-09	3.31945e-11	9.55148e-11	7.57977e-10
872	62841	SP3	HEK293	Epithelium	Embryonic Kidney	6.37503e-11	4.80784e-08	6.4039e-11	9.57778e-11	7.59193e-10
873	74658	NRF1	HepG2	Epithelium	Liver	1.91087e-10	6.9568e-10	4.19025e-11	9.8246e-11	7.77865e-10
874	63730	H2AFZ	KMS11	None	None	8.58707e-10	5.91695e-11	9.2988e-11	1.04097e-10	8.23249e-10
875	5573	GATA1	None	Erythroblast	Blood	7.09422e-09	3.64553e-11	2.30939e-09	1.07124e-10	8.46222e-10
876	8412	GATA2	None	Haematopoietic Progenitor Cell	Blood	8.98127e-11	3.1918e-08	6.02552e-11	1.08063e-10	8.52658e-10
877	63208	GABPA	K562	Erythroblast	Bone Marrow	3.02027e-09	2.11447e-08	3.66953e-11	1.08578e-10	8.5575e-10
878	49870	ELF1	SK-N-MC	None	Brain	1.48324e-10	1.26538e-10	8.2337e-11	1.11982e-10	8.81574e-10
879	51863	HSF1	451Lu	Melanoma Cell	None	1.09127e-10	9.41956e-07	5.70665e-11	1.1241e-10	8.83931e-10
880	59346	RBPJ	MutuI	B Lymphocyte	None	1.0908e-10	8.03131e-11	2.19116e-10	1.1458e-10	8.99971e-10
881	49021	CPSF3L	HeLa	Epithelium	Cervix	1.69927e-10	8.28001e-11	1.22473e-10	1.14823e-10	9.00856e-10
882	73721	CREBBP	None	B Lymphocyte	Tonsil	5.33583e-10	5.1057e-11	2.42903e-10	1.17293e-10	9.19195e-10
883	46183	SIN3A	H1	Embryonic Stem Cell	Embryo	6.61563e-11	4.75395e-08	9.61235e-11	1.17463e-10	9.19482e-10
884	4118	HDAC1	None	T Lymphocyte	Blood	3.34124e-10	2.49411e-10	5.51966e-11	1.1943e-10	9.3382e-10
885	49669	PROX1	SW480	None	Colon	3.90505e-10	2.99024e-06	4.45517e-11	1.19967e-10	9.3696e-10
886	8549	RNF2	HEK293T	Epithelium	Embryonic Kidney	9.12293e-11	3.42429e-09	7.55302e-11	1.22483e-10	9.55535e-10
887	74906	POLR3D	THP-1	Macrophage	None	3.87637e-10	0.00121016	4.63505e-11	1.24201e-10	9.6784e-10
888	8656	ERG	VCaP	Epithelium	Prostate	8.63384e-11	2.74685e-09	8.23174e-11	1.2451e-10	9.69158e-10
889	4975	RELA	GM12891	Lymphoblastoid	Blood	2.63339e-10	1.08763e-10	9.37858e-11	1.26827e-10	9.86083e-10
890	75836	RAD21	Rh4	rhabdomyosarcoma	None	7.05528e-10	1.60865e-07	4.51087e-11	1.2716e-10	9.87564e-10
891	46342	YY1	SK-N-SH	Neuroblastoma cell	Brain	4.70325e-10	1.04316e-10	8.65571e-11	1.28946e-10	1.00031e-09
892	64917	CBX1	K562	Erythroblast	Bone Marrow	1.36046e-10	1.32519e-10	1.20122e-10	1.29191e-10	1.00109e-09
893	54609	YAP1	SF268	None	None	3.9194e-10	1.2115e-10	8.12758e-11	1.29817e-10	1.00481e-09
894	41788	EZH2	None	iPSC	None	6.4575e-11	0.000141657	1.39653e-10	1.32471e-10	1.02421e-09
895	58805	MYB	None	Th1	None	1.1104e-10	3.29422e-10	9.79275e-11	1.34813e-10	1.04115e-09
896	74638	NRF1	MCF-7	None	None	1.53183e-10	2.93332e-09	6.68056e-11	1.37376e-10	1.05976e-09
897	45802	CHD2	HepG2	Epithelium	Liver	2.67254e-10	2.50641e-10	7.13099e-11	1.379e-10	1.06262e-09
898	72343	MYC	U87	Glioblastoma cell	None	1.49881e-10	1.29976e-10	1.39726e-10	1.39389e-10	1.07289e-09
899	42535	STAG1	GM2588	Lymphoblastoid	Blood	1.3723e-08	5.45751e-07	4.8717e-11	1.45621e-10	1.11961e-09
900	38496	RBL1	IMR90	Fibroblast	Lung	9.07318e-11	9.69527e-10	1.26588e-10	1.50357e-10	1.15474e-09
901	46301	PML	K562	Erythroblast	Bone Marrow	2.83321e-10	6.87393e-10	6.85762e-11	1.53322e-10	1.17621e-09
902	56558	SMC1A	HuCCT1	None	None	5.86937e-08	0.000182096	5.17975e-11	1.55256e-10	1.18972e-09
903	46123	MEF2A	GM12878	B Lymphocyte	Blood	2.00642e-09	5.89964e-11	5.46397e-10	1.55612e-10	1.19113e-09
904	49651	MED1	MCF-7	Epithelium	Breast	2.96092e-09	9.96448e-11	1.19981e-10	1.60359e-10	1.22611e-09
905	46274	CREB1	K562	Erythroblast	Bone Marrow	2.89772e-10	1.50201e-09	6.91392e-11	1.61461e-10	1.23317e-09
906	5443	FLI1	None	Endothelial Cell	Umbilical Vein	1.81676e-10	1.38732e-08	7.85894e-11	1.63928e-10	1.25063e-09
907	46254	ELF1	HepG2	Epithelium	Liver	6.83475e-10	5.16067e-09	6.08499e-11	1.6583e-10	1.26375e-09
908	46036	JUND	SK-N-SH	Neuroblastoma cell	Brain	2.75507e-09	6.1115e-11	8.25032e-10	1.67246e-10	1.27313e-09
909	33171	MED1	H2171	Epithelium	Lung	9.18164e-10	4.11313e-07	6.05029e-11	1.70264e-10	1.29465e-09
910	4963	RELA	GM18951	Lymphoblastoid	Blood	1.37168e-09	4.6284e-09	6.00394e-11	1.70447e-10	1.29465e-09
911	35046	ESR1	MCF-7	Epithelium	Breast	1.91351e-10	1.29527e-06	8.19543e-11	1.7213e-10	1.306e-09
912	68821	HDAC2	None	Erythroid progenitor	Bone Marrow	4.72314e-10	3.85389e-10	8.10717e-11	1.75986e-10	1.33379e-09
913	48277	CEBPA	GM12878	B Lymphocyte	Blood	6.85806e-10	1.4308e-10	1.19625e-10	1.785e-10	1.35136e-09
914	62533	BCL3	A549	Epithelium	Lung	3.00124e-10	7.41306e-10	8.5606e-11	1.83348e-10	1.38654e-09
915	71322	RAD21	HCT-116	Colon cancer cell	Colon	1.01637e-09	5.46158e-06	6.66661e-11	1.87685e-10	1.41779e-09
916	45742	KAT2B	HeLa-S3	Epithelium	Cervix	1.92311e-10	1.77214e-10	2.01378e-10	1.8977e-10	1.43198e-09
917	65146	ZBTB14	HEK293	Epithelium	Embryonic Kidney	2.10903e-10	5.06768e-08	9.42285e-11	1.95138e-10	1.47088e-09
918	47412	GABPA	VCaP	Epithelium	Prostate	1.90923e-10	1.20669e-09	1.09071e-10	1.96918e-10	1.48267e-09
919	45625	NFYB	GM12878	B Lymphocyte	Blood	1.04154e-09	8.70731e-10	7.7128e-11	1.99018e-10	1.49686e-09
920	46323	ELF1	MCF-7	Epithelium	Breast	1.95569e-10	1.08544e-07	1.06626e-10	2.06882e-10	1.55358e-09
921	36300	BRD4	None	T Lymphocyte	Blood	2.73184e-10	2.48718e-09	9.58814e-11	2.07009e-10	1.55358e-09
922	45606	FOS	GM12878	B Lymphocyte	Blood	4.05346e-10	1.94851e-10	1.58925e-10	2.1596e-10	1.619e-09
923	33198	MED1	U87	None	Brain	4.86721e-10	2.12505e-08	8.58831e-11	2.18256e-10	1.63443e-09
924	45426	CHD1	K562	Erythroblast	Bone Marrow	6.36434e-10	9.55846e-11	6.06049e-10	2.19247e-10	1.64008e-09
925	5044	CTCF	GM12892	Lymphoblastoid	Blood	2.62556e-09	1.15414e-05	7.87997e-11	2.29509e-10	1.71499e-09
926	46191	JUND	H1	Embryonic Stem Cell	Embryo	1.02353e-09	1.02888e-06	8.28673e-11	2.29965e-10	1.71654e-09
927	52087	TRIM28	None	Hematopoietic Stem Cell	None	9.94249e-07	0.207433	7.98367e-11	2.39491e-10	1.78572e-09
928	8794	RBBP5	K562	Erythroblast	Bone Marrow	1.80062e-10	2.91459e-10	3.30567e-10	2.49797e-10	1.86056e-09
929	46157	POU2F2	GM12891	Lymphoblastoid	Blood	1.67702e-09	1.15884e-10	3.72339e-10	2.51861e-10	1.87391e-09
930	72351	BRD4	CAL-1	Plasmacytoid dendritic cell	None	2.83268e-10	2.40669e-10	2.64638e-10	2.61687e-10	1.94493e-09
931	43046	BRD2	MM1.S	B Lymphocyte	Blood	2.04978e-09	1.24949e-10	3.57575e-10	2.65776e-10	1.97319e-09
932	42215	STAT3	OCI-Ly7	B cell lymphoma	Blood	1.03229e-09	1.65945e-10	2.43306e-10	2.70152e-10	2.00353e-09
933	43105	RBPJ	CUTLL1	T Lymphocyte	Blood	6.30512e-10	2.17359e-09	1.14002e-10	2.7732e-10	2.05449e-09
934	73504	BRD4	SUM159PT	mammary carcinoma cell line	Breast	1.49771e-09	4.70367e-08	9.91655e-11	2.78471e-10	2.06081e-09
935	53594	MED1	None	Adipocyte	None	1.82502e-10	4.39217e-07	2.0819e-10	2.91687e-10	2.1563e-09
936	57808	BRD4	LX2	Hepatic Stellate Cell	None	5.95027e-10	1.68913e-09	1.26239e-10	2.94288e-10	2.1732e-09
937	58315	MED1	LNCaP-abl	Epithelium	Prostate	9.83663e-10	6.8157e-10	1.40994e-10	3.13273e-10	2.31093e-09
938	35832	CTCF	GM19240	Lymphoblastoid	Blood	2.23557e-08	7.43734e-05	1.05215e-10	3.14166e-10	2.31505e-09
939	39035	BRD4	H2171	Epithelium	Lung	8.53194e-09	0.000223694	1.07204e-10	3.17621e-10	2.33595e-09
940	73697	PAF1	SEM	B Lymphocyte	None	1.93607e-10	5.78058e-10	3.92391e-10	3.17678e-10	2.33595e-09
941	76496	BRPF3	RKO	Epithelium	Colon	1.49408e-10	1.67805e-08	4.794e-10	3.3942e-10	2.49093e-09
942	46202	ELF1	HCT-116	None	Colon	1.58145e-08	9.41831e-08	1.14167e-10	3.39636e-10	2.49093e-09
943	75561	BRD4	None	None	Retina	7.09062e-10	4.83913e-08	1.35355e-10	3.40176e-10	2.49093e-09
944	52683	FOXA2	CyT49	Embryonic Stem Cell	Embryo	1.84423e-10	1.13868e-07	2.95217e-10	3.40197e-10	2.49093e-09
945	41573	ING5	RKO	Epithelium	Colon	3.70527e-10	4.56242e-10	2.56874e-10	3.41544e-10	2.49815e-09
946	58079	KDM2B	None	Myeloid Cell	None	1.10572e-09	3.72456e-07	1.30878e-10	3.50968e-10	2.56437e-09
947	53253	FOXM1	HEK293	Epithelium	Embryonic Kidney	3.36585e-10	9.54871e-10	2.27314e-10	3.56401e-10	2.60132e-09
948	4973	RELA	GM12891	Lymphoblastoid	Blood	1.2821e-09	8.24127e-10	1.65923e-10	3.74052e-10	2.72727e-09
949	54234	RUNX1	Jurkat	T Lymphocyte	Blood	1.67148e-09	1.83364e-07	1.37942e-10	3.82011e-10	2.77745e-09
950	59416	RUNX1	Jurkat	T Lymphocyte	Blood	1.67148e-09	1.83364e-07	1.37942e-10	3.82011e-10	2.77745e-09
951	48340	SNAI2	None	Keratinocyte	None	3.08119e-10	4.73347e-08	2.18155e-10	3.8214e-10	2.77745e-09
952	74665	NRF1	K562	Erythroblast	Bone Marrow	4.30784e-10	5.60066e-09	1.87419e-10	3.82871e-10	2.77984e-09
953	76151	MYC	LNCaP	Epithelium	Prostate	8.1145e-10	3.86063e-09	1.59619e-10	3.86783e-10	2.80529e-09
954	65123	ZFP64	HEK293	Epithelium	Embryonic Kidney	1.48488e-10	1.52381e-07	1.13539e-09	3.93604e-10	2.85177e-09
955	46170	YY1	H1	Embryonic Stem Cell	Embryo	1.66392e-09	2.1408e-05	1.46886e-10	4.04911e-10	2.93062e-09
956	68464	ATF3	HCT-116	Colon cancer cell	Colon	3.43518e-10	6.33379e-09	2.31664e-10	4.062e-10	2.93687e-09
957	67927	SPI1	None	Macrophage	Blood	3.0474e-07	0.000276661	1.36177e-10	4.08348e-10	2.94932e-09
958	63362	C11orf30	K562	Erythroblast	Bone Marrow	2.6021e-09	1.55898e-10	2.03868e-09	4.11565e-10	2.96945e-09
959	46131	RUNX3	GM12878	B Lymphocyte	Blood	1.78491e-09	2.39358e-07	1.50257e-10	4.15529e-10	2.99493e-09
960	53260	FOXM1	HEK293	Epithelium	Embryonic Kidney	5.05491e-09	2.58801e-10	3.19882e-10	4.17365e-10	3.00503e-09
961	52153	FAIRE	None	Macrophage	None	3.87655e-09	3.75608e-08	1.47761e-10	4.25394e-10	3.05851e-09
962	46287	SP2	K562	Erythroblast	Bone Marrow	1.95388e-09	1.75694e-10	1.18474e-09	4.25679e-10	3.05851e-09
963	53297	ERG	TSU-1621-MT	None	None	2.15448e-07	3.26836e-05	1.46383e-10	4.38849e-10	3.14987e-09
964	64317	ETV4	HepG2	Epithelium	Liver	1.68609e-09	4.3954e-07	1.60815e-10	4.4029e-10	3.15694e-09
965	1362	STAT1	HeLa-S3	Epithelium	Cervix	2.1895e-09	2.91762e-08	1.6012e-10	4.45347e-10	3.18988e-09
966	45664	RELA	GM12892	Lymphoblastoid	Blood	1.63318e-09	7.72301e-10	2.14924e-10	4.57321e-10	3.27226e-09
967	42774	NFYC	LoVo	None	Colon	1.02265e-09	4.43534e-10	3.50373e-10	4.92889e-10	3.5219e-09
968	1012	FOXP1	H9	Embryonic Stem Cell	Embryo	3.36881e-09	9.79184e-08	1.73151e-10	4.9323e-10	3.5219e-09
969	41496	TP53	GM06993, GM11992	Lymphoblastoid	Blood	2.40364e-09	3.02174e-10	4.70146e-10	5.12611e-10	3.65652e-09
970	40166	TCF7L1	Kasumi-1	Myeloblast	Blood	9.01857e-08	2.60947e-06	1.73221e-10	5.18633e-10	3.69566e-09
971	69811	NELFE	MCF-7	Human Breast Cancer Cell	Breast	6.4882e-10	5.68872e-10	4.62498e-10	5.4932e-10	3.9103e-09
972	62637	KLF9	HEK293	Epithelium	Embryonic Kidney	1.13107e-09	6.93124e-08	2.29684e-10	5.71173e-10	4.06168e-09
973	45222	HDAC2	H1	Embryonic Stem Cell	Embryo	5.03075e-10	6.90133e-07	3.08139e-10	5.73119e-10	4.06714e-09
974	8810	HDAC2	H1	Embryonic Stem Cell	Embryo	5.03075e-10	6.90133e-07	3.08139e-10	5.73119e-10	4.06714e-09
975	63664	BCL3	A549	Epithelium	Lung	1.41441e-09	5.25594e-09	2.39328e-10	5.91059e-10	4.19015e-09
976	38200	MYC	H54	Glial Cell	Brain	5.40204e-10	6.1674e-10	6.70322e-10	6.04302e-10	4.27965e-09
977	43194	FOXM1	HeLa	Epithelium	Cervix	7.08044e-09	3.01711e-10	6.87324e-10	6.10926e-10	4.32213e-09
978	75283	ZBTB48	HeLa	None	None	7.1201e-10	3.19784e-09	3.27112e-10	6.28372e-10	4.44101e-09
979	38654	NFATC1	None	Endothelial Cell	Umbilical Vein	3.46515e-09	2.14354e-09	2.5831e-10	6.4845e-10	4.57823e-09
980	46326	HDAC2	MCF-7	Epithelium	Breast	4.06168e-10	2.40171e-07	4.64649e-10	6.49581e-10	4.58154e-09
981	74351	OTX2	D-341	None	None	2.84714e-10	1.69181e-08	9.88523e-10	6.54591e-10	4.61217e-09
982	65125	PRDM6	HEK293	Epithelium	Embryonic Kidney	2.03116e-09	2.52679e-10	1.94836e-08	6.66482e-10	4.69116e-09
983	33679	GATA3	None	Th1	None	4.2385e-09	2.73146e-09	2.61924e-10	6.78742e-10	4.7726e-09
984	47416	ERG	Jurkat	T Lymphocyte	Blood	1.39404e-09	3.78102e-10	1.0752e-09	6.98944e-10	4.90965e-09
985	74352	OTX2	D-341	None	None	5.2241e-10	9.11384e-10	7.83758e-10	6.99734e-10	4.91022e-09
986	46235	HDAC2	HepG2	Epithelium	Liver	1.14476e-08	9.37366e-06	2.42061e-10	7.11129e-10	4.98511e-09
987	45861	CEBPB	IMR90	Fibroblast	Lung	8.67446e-08	2.54589e-10	4.06643e-09	7.16788e-10	5.01969e-09
988	45932	GTF2B	K562	Erythroblast	Bone Marrow	8.16827e-10	4.91934e-10	1.18263e-09	7.31241e-10	5.11573e-09
989	45967	STAT2	K562	Erythroblast	Bone Marrow	3.47146e-09	1.12991e-09	3.45216e-10	7.37132e-10	5.15072e-09
990	35308	TCF12	Kasumi-1	Myeloblast	Blood	5.93502e-09	5.44515e-09	2.69225e-10	7.37733e-10	5.15072e-09
991	53673	NIPBL	None	Embryonic Stem Cell	None	2.25769e-09	1.2672e-08	2.83247e-10	7.40315e-10	5.16304e-09
992	57809	BRD4	LX2	Hepatic Stellate Cell	None	1.83066e-09	6.51394e-10	5.08334e-10	7.40991e-10	5.16304e-09
993	52550	SMARCA4	501-Mel	Melanoma Cell	None	5.62486e-09	2.72002e-10	7.79865e-09	7.53304e-10	5.24354e-09
994	955	NANOG	H1	Embryonic Stem Cell	Embryo	5.05054e-10	2.2225e-06	5.21793e-10	7.69842e-10	5.35327e-09
995	62964	EED	GM12878	B Lymphocyte	Blood	1.7034e-08	2.88503e-10	3.54709e-09	7.88064e-10	5.47447e-09
996	72854	TRAF7	None	None	meningioma	1.55045e-09	1.9925e-09	3.80889e-10	7.95273e-10	5.519e-09
997	46057	SIN3A	A549	Epithelium	Lung	5.78105e-10	8.31712e-10	1.28157e-09	8.08097e-10	5.60238e-09
998	54243	FOXO1	None	Stromal Cell	Endometrium	3.39618e-09	4.35284e-09	3.17789e-10	8.17233e-10	5.66003e-09
999	45790	HNF4A	HepG2	Epithelium	Liver	5.61242e-10	3.32409e-08	6.2049e-10	8.76303e-10	6.06307e-09
1000	53259	FOXM1	HEK293	Epithelium	Embryonic Kidney	1.23747e-08	3.76443e-10	1.55207e-09	8.87167e-10	6.1321e-09
1001	65155	ZBTB48	HEK293	Epithelium	Embryonic Kidney	3.17367e-10	8.97695e-08	9.57349e-09	9.18409e-10	6.3417e-09
1002	63035	PRDM10	HEK293	Epithelium	Embryonic Kidney	9.61976e-10	2.65622e-05	4.57037e-10	9.29491e-10	6.41182e-09
1003	2110	PRAME	K562	Erythroblast	Bone Marrow	8.0907e-09	7.13182e-09	3.45494e-10	9.49903e-10	6.54609e-09
1004	36321	RELA	GM15510	Lymphoblastoid	Blood	4.62621e-09	4.08946e-10	2.67741e-09	9.88478e-10	6.80514e-09
1005	68913	KDM5C	ZR-75-30	None	None	6.16486e-10	1.48297e-09	1.39975e-09	9.96403e-10	6.85287e-09
1006	46255	ZBTB33	HepG2	Epithelium	Liver	6.02418e-10	1.67147e-09	1.48702e-09	1.02363e-09	7.03315e-09
1007	71748	SOX4	None	Fibroblast	Fetal Lung	4.1944e-09	9.91199e-08	3.79876e-10	1.04133e-09	7.14762e-09
1008	46190	SP1	H1	Embryonic Stem Cell	Embryo	6.56115e-09	6.32853e-06	3.6888e-10	1.04768e-09	7.18407e-09
1009	76964	CNOT3	HCT-116	Colorectal cancer cell line	None	6.05139e-09	0.0182937	3.73376e-10	1.05503e-09	7.22733e-09
1010	68048	NFKB1	L1236	Hodgkin Lymphoma Cell	None	7.58521e-10	3.51957e-09	8.1704e-10	1.06142e-09	7.26387e-09
1011	76499	ZMYND8	ZR-75-30	None	None	1.12664e-09	5.73329e-09	6.02213e-10	1.1019e-09	7.53349e-09
1012	55775	CTCFL	Delta47	None	None	6.26364e-09	6.68078e-07	3.95302e-10	1.11488e-09	7.61471e-09
1013	64302	E2F5	K562	Erythroblast	Bone Marrow	1.33244e-08	2.82357e-09	4.53595e-10	1.13903e-09	7.77194e-09
1014	68309	NR4A1	Kasumi-1	Acute myeloid leukemia	None	2.04719e-08	2.34422e-09	4.66257e-10	1.14496e-09	7.80473e-09
1015	47598	GATA4	AGS	Epithelium	Stomach	2.51454e-08	2.30816e-05	3.88134e-10	1.14668e-09	7.80873e-09
1016	63207	GABPA	K562	Erythroblast	Bone Marrow	1.1992e-08	3.12141e-09	4.58911e-10	1.16152e-09	7.90198e-09
1017	69220	SLC22A2	HBL1	B cell lymphoma	None	7.35223e-10	5.93755e-09	9.95422e-10	1.1843e-09	8.04902e-09
1018	34078	CDK8	None	Epithelium	Colon	4.60547e-09	4.23259e-09	4.9028e-10	1.20335e-09	8.17047e-09
1019	47327	FOXA1	DU145	Epithelium	Prostate	2.19475e-07	4.06909e-10	6.63256e-07	1.21772e-09	8.25997e-09
1020	67794	BRD4	T47D	None	None	2.57552e-09	1.01935e-09	9.49003e-10	1.23812e-09	8.3901e-09
1021	55351	SUMO2	VCaP	Epithelium	Prostate	3.00682e-09	7.99962e-07	4.91533e-10	1.26674e-09	8.57564e-09
1022	42738	NFYA	LoVo	None	Colon	2.22983e-09	1.5794e-09	7.81059e-10	1.27015e-09	8.59028e-09
1023	68966	PR	T47D	None	Breast	8.75297e-10	9.20986e-08	9.85142e-10	1.3835e-09	9.34777e-09
1024	75044	MYC	MDA-MB-231	None	Breast	1.86049e-09	8.80212e-10	2.13399e-09	1.40044e-09	9.45295e-09
1025	76498	ZMYND8	ZR-75-30	None	None	1.27994e-08	5.37552e-10	5.63308e-09	1.41781e-09	9.5609e-09
1026	38811	SMC3	LoVo	None	Colon	2.03804e-08	1.7134e-06	4.85544e-10	1.42234e-09	9.5821e-09
1027	42588	STAG1	MS1	Lymphoblastoid	Blood	9.86659e-08	2.79889e-07	4.90812e-10	1.4626e-09	9.84368e-09
1028	46117	ETS1	GM12878	B Lymphocyte	Blood	8.70849e-09	1.17148e-08	5.66936e-10	1.52745e-09	1.02702e-08
1029	56427	MYC	None	Epithelium	Breast	5.20928e-09	1.03799e-09	1.25452e-09	1.53651e-09	1.0311e-08
1030	59542	MYC	IMEC	Epithelium	Breast	5.20928e-09	1.03799e-09	1.25452e-09	1.53651e-09	1.0311e-08
1031	42352	STAG1	GM12892	Lymphoblastoid	Blood	7.9816e-08	3.72342e-06	5.19868e-10	1.5493e-09	1.03868e-08
1032	49467	598-SKD	MCF-7	Epithelium	Breast	2.24137e-08	0.00760067	5.33823e-10	1.56421e-09	1.04766e-08
1033	38704	HINFP	LoVo	None	Colon	1.60255e-09	3.17382e-09	1.06302e-09	1.59591e-09	1.06786e-08
1034	45691	MYC	H1	Embryonic Stem Cell	Embryo	3.08934e-09	1.39831e-09	1.2436e-09	1.62781e-09	1.08815e-08
1035	46213	JUND	HCT-116	None	Colon	8.37504e-09	1.24206e-06	5.81806e-10	1.63133e-09	1.08944e-08
1036	76812	NEUROG2	None	Fibroblast	Fetal Lung	1.91834e-09	8.22184e-10	1.99578e-08	1.67817e-09	1.11964e-08
1037	64860	EGR2	HEK293	Epithelium	Embryonic Kidney	7.40915e-10	0.000141203	2.39118e-09	1.69694e-09	1.13107e-08
1038	45905	CHD2	K562	Erythroblast	Bone Marrow	2.49569e-09	4.23335e-09	9.11362e-10	1.72993e-09	1.15196e-08
1039	42368	STAG1	GM18486	Lymphoblastoid	Blood	1.10917e-07	4.88673e-07	5.80947e-10	1.73171e-09	1.15203e-08
1040	46085	TCF12	ECC-1	Epithelium	Endometrium	1.17066e-08	8.05584e-08	6.21901e-10	1.7587e-09	1.16886e-08
1041	53252	FOXM1	HEK293	Epithelium	Embryonic Kidney	4.1041e-09	1.5615e-09	1.41835e-09	1.88785e-09	1.25349e-08
1042	34081	CDK8	None	Epithelium	Colon	6.85971e-09	2.61935e-09	9.50387e-10	1.89903e-09	1.2597e-08
1043	1013	FOXP1	H9	Embryonic Stem Cell	Embryo	1.2845e-08	9.32519e-06	6.84924e-10	1.95062e-09	1.29268e-08
1044	62852	CTCF	None	None	gastroesophageal sphincter	2.02814e-08	5.6908e-09	8.09641e-10	2.05459e-09	1.36028e-08
1045	49002	ELL2	HeLa	Epithelium	Cervix	7.01924e-09	1.29073e-09	1.88652e-09	2.07283e-09	1.37104e-08
1046	46095	CREB1	ECC-1	Epithelium	Endometrium	3.55478e-08	8.25009e-10	4.90166e-09	2.0772e-09	1.37262e-08
1047	38635	FOXD2	LoVo	None	Colon	1.58086e-09	2.42476e-09	2.77941e-09	2.13558e-09	1.40985e-08
1048	5046	CTCF	GM19240	Lymphoblastoid	Blood	2.78931e-08	5.6682e-05	7.76009e-10	2.26498e-09	1.49385e-08
1049	39777	REPIN1	Kasumi-1	Myeloblast	Blood	2.40252e-07	4.82185e-08	7.7657e-10	2.28551e-09	1.50595e-08
1050	49649	MED1	MCF-7	Epithelium	Breast	6.30125e-09	7.92664e-09	9.80405e-10	2.29913e-09	1.51348e-08
1051	43045	BRD2	MM1.S	B Lymphocyte	Blood	1.82362e-08	1.18629e-09	2.65438e-09	2.3538e-09	1.548e-08
1052	73970	ZNF202	293T	None	None	1.54277e-09	1.80187e-08	1.76151e-09	2.35965e-09	1.55037e-08
1053	43053	BRD3	MM1.S	B Lymphocyte	Blood	3.93651e-09	1.94928e-09	1.9914e-09	2.36369e-09	1.55155e-08
1054	63885	BCL3	A549	Epithelium	Lung	8.82313e-09	2.25423e-09	1.42071e-09	2.3794e-09	1.56038e-08
1055	65111	SP4	HEK293	Epithelium	Embryonic Kidney	6.64927e-09	8.157e-06	9.08772e-10	2.39827e-09	1.57127e-08
1056	69615	CDK7	Jurkat	T Lymphocyte	Blood	3.92993e-09	3.65059e-08	1.03965e-09	2.41213e-09	1.57885e-08
1057	56046	GABPA	HepG2	Epithelium	Liver	4.24292e-09	2.20183e-06	9.94918e-10	2.41692e-09	1.58049e-08
1058	77536	REL	GM12878	Lymphoblastoid	None	6.53121e-09	1.30276e-08	1.03395e-09	2.50618e-09	1.63731e-08
1059	45751	TCF7L2	HeLa-S3	Epithelium	Cervix	1.77324e-08	1.03874e-09	5.72355e-09	2.51296e-09	1.64019e-08
1060	46037	RFX5	SK-N-SH	Neuroblastoma cell	Brain	1.31869e-08	1.45818e-09	2.36329e-09	2.53217e-09	1.65116e-08
1061	46062	USF1	A549	Epithelium	Lung	4.53777e-09	6.10963e-08	1.06341e-09	2.54861e-09	1.66032e-08
1062	40230	BRD4	None	Plasma Cell	None	7.40039e-09	1.31012e-09	3.68982e-09	2.56535e-09	1.66965e-08
1063	44877	5HMC	None	Erythroid Cell	None	1.1573e-07	8.79259e-10	9.87091e-07	2.61557e-09	1.70074e-08
1064	65106	ZNF384	HEK293	Epithelium	Embryonic Kidney	9.73964e-09	9.67615e-10	0.00022181	2.6405e-09	1.71533e-08
1065	75276	ZBTB48	U2OS	None	None	4.19586e-09	3.19073e-08	1.18997e-09	2.70264e-09	1.75405e-08
1066	46257	REST	HepG2	Epithelium	Liver	4.36243e-09	6.8673e-06	1.16111e-09	2.75072e-09	1.78358e-08
1067	47576	SMAD3	NCI-H441	Epithelium	Lung	2.93565e-09	3.59334e-08	1.38747e-09	2.75429e-09	1.78423e-08
1068	56267	AR	CWR22Pc	Epithelium	Prostate	3.55096e-09	2.93507e-09	2.16466e-09	2.7668e-09	1.79065e-08
1069	62638	RNF2	K562	Erythroblast	Bone Marrow	1.9127e-08	1.59876e-08	1.03479e-09	2.77467e-09	1.79406e-08
1070	1877	RBL2	IMR90	Fibroblast	Lung	2.15768e-09	3.37108e-09	3.24042e-09	2.80714e-09	1.81336e-08
1071	63363	C11orf30	K562	Erythroblast	Bone Marrow	1.27493e-08	3.20478e-09	1.49072e-09	2.82676e-09	1.82433e-08
1072	42752	BARX1	LoVo	None	Colon	8.90063e-09	2.87534e-09	1.68151e-09	2.84403e-09	1.83376e-08
1073	53629	STAT5B	None	T Lymphocyte	Blood	6.5842e-09	3.16963e-09	1.75165e-09	2.88944e-09	1.86131e-08
1074	8099	MYC	HeLa	Epithelium	Cervix	2.88042e-09	2.25626e-09	4.17836e-09	2.91344e-09	1.87502e-08
1075	8806	CHD1	H1	Embryonic Stem Cell	Embryo	2.7487e-09	8.85476e-09	1.878e-09	2.97258e-09	1.91085e-08
1076	2916	ERG	VCaP	Epithelium	Prostate	6.8199e-09	5.36098e-06	1.16049e-09	2.97465e-09	1.91085e-08
1077	64303	E2F5	K562	Erythroblast	Bone Marrow	1.64123e-08	1.13001e-07	1.08808e-09	3.03389e-09	1.9471e-08
1078	53670	NIPBL	None	Embryonic Stem Cell	None	4.57885e-09	4.74298e-08	1.35349e-09	3.06651e-09	1.96556e-08
1079	42462	STAG1	GM19238	Lymphoblastoid	Blood	8.33035e-08	3.55703e-06	1.03579e-09	3.06834e-09	1.96556e-08
1080	46368	FOXA1	T47D	Epithelium	Mammary Gland	6.44788e-08	1.66596e-06	1.04814e-09	3.0922e-09	1.97901e-08
1081	41475	BRD4	OCI-Ly1	B cell lymphoma	Bone Marrow	4.10268e-08	1.1703e-09	1.23378e-08	3.1253e-09	1.99834e-08
1082	47328	FOXA1	DU145	Epithelium	Prostate	2.93303e-07	1.04986e-09	3.90656e-06	3.13751e-09	2.00429e-08
1083	46362	TCF12	SK-N-SH	Neuroblastoma cell	Brain	4.56035e-09	1.73979e-07	1.50323e-09	3.36978e-09	2.15069e-08
1084	43101	NOTCH1	CUTLL1	T Lymphocyte	Blood	1.52693e-08	3.22268e-09	2.08214e-09	3.5044e-09	2.23454e-08
1085	46115	POU2F2	GM12878	B Lymphocyte	Blood	2.46684e-08	1.70221e-08	1.32297e-09	3.50812e-09	2.23485e-08
1086	64103	BCL3	A549	Epithelium	Lung	2.21744e-08	1.68869e-09	4.83424e-09	3.55396e-09	2.26197e-08
1087	35855	CTCF	GM19238	Lymphoblastoid	Blood	4.36167e-08	0.000237143	1.24172e-09	3.62202e-09	2.30317e-08
1088	46233	CEBPB	HepG2	Epithelium	Liver	2.70394e-09	2.57204e-09	2.21117e-08	3.73203e-09	2.37094e-08
1089	8777	HDAC2	K562	Erythroblast	Bone Marrow	2.36417e-09	1.28992e-08	3.35077e-09	3.75496e-09	2.38331e-08
1090	41476	BRD4	OCI-Ly1	B cell lymphoma	Bone Marrow	2.40548e-08	1.44613e-09	1.86409e-08	3.8133e-09	2.41812e-08
1091	278	SMAD3	BG03	Embryonic Stem Cell	Embryo	2.76694e-09	6.7323e-09	3.91097e-09	3.9183e-09	2.48243e-08
1092	45737	GTF2F1	HeLa-S3	Epithelium	Cervix	1.77845e-08	5.26787e-09	1.93521e-09	3.93289e-09	2.48939e-08
1093	46205	USF1	HCT-116	None	Colon	4.90364e-08	1.64083e-06	1.36242e-09	3.97356e-09	2.51283e-08
1094	62535	BCL3	A549	Epithelium	Lung	1.52517e-08	4.91878e-08	1.52442e-09	4.04375e-09	2.55488e-08
1095	67928	SPI1	None	Macrophage	Blood	2.13175e-07	9.43396e-06	1.36708e-09	4.07453e-09	2.57198e-08
1096	55577	SPI1	None	B Lymphocyte	None	1.22047e-07	1.40016e-09	2.44025e-07	4.12941e-09	2.60424e-08
1097	48995	AFF4	HeLa	Epithelium	Cervix	2.85172e-08	3.49515e-09	2.50216e-09	4.16185e-09	2.6219e-08
1098	49010	CPSF3L	HeLa	Epithelium	Cervix	6.42365e-09	3.12561e-09	4.08705e-09	4.165e-09	2.6219e-08
1099	39014	BRD4	MM1.S	B Lymphocyte	Blood	1.88955e-08	2.1696e-09	4.91376e-09	4.18208e-09	2.63026e-08
1100	1082	SMAD2/3	H9	Embryonic Stem Cell	Embryo	8.63956e-09	1.1461e-07	1.81802e-09	4.44761e-09	2.79472e-08
1101	63792	RNF2	HepG2	Epithelium	Liver	3.46157e-09	8.60148e-09	3.81531e-09	4.49608e-09	2.82261e-08
1102	63305	CREB1	HepG2	Epithelium	Liver	9.46413e-09	2.0954e-06	1.82084e-09	4.57779e-09	2.8713e-08
1103	45414	HDAC2	K562	Erythroblast	Bone Marrow	2.82326e-09	9.90464e-09	5.19403e-09	4.63183e-09	2.90256e-08
1104	64752	H2AFZ	None	Hepatocyte	None	7.48619e-09	4.31108e-09	3.84591e-09	4.79573e-09	3.00255e-08
1105	45983	CTCF	MCF-7	Epithelium	Breast	7.88584e-09	0.00297016	2.06156e-09	4.90292e-09	3.06688e-08
1106	75847	CTCF	Rh4	rhabdomyosarcoma	None	1.94555e-07	3.32654e-05	1.69726e-09	5.0475e-09	3.15446e-08
1107	45765	NRF1	HeLa-S3	Epithelium	Cervix	5.73216e-09	4.40965e-09	5.27894e-09	5.07905e-09	3.17131e-08
1108	58807	MAF	None	Th1	None	2.13408e-08	2.26195e-09	9.93381e-09	5.08801e-09	3.17404e-08
1109	74663	ZNF18	K562	Erythroblast	Bone Marrow	1.49111e-08	2.51652e-09	8.15549e-09	5.11026e-09	3.18504e-08
1110	42367	STAG1	GM18486	Lymphoblastoid	Blood	1.00281e-07	1.83723e-05	1.73693e-09	5.1216e-09	3.18923e-08
1111	4939	RELA	GM19193	Lymphoblastoid	Blood	1.77093e-08	5.07541e-08	1.97476e-09	5.14967e-09	3.20383e-08
1112	37305	CREB1	A549	Epithelium	Lung	3.37258e-08	2.90443e-09	4.85981e-09	5.17489e-09	3.21662e-08
1113	42567	STAG1	GM2630	Lymphoblastoid	Blood	2.64344e-07	5.65145e-06	1.7502e-09	5.21447e-09	3.23831e-08
1114	48339	SNAI2	None	Keratinocyte	None	2.60428e-09	1.00127e-07	5.81853e-09	5.3019e-09	3.28965e-08
1115	49449	NRF1	T47D	Epithelium	Mammary Gland	5.18814e-09	6.06621e-09	4.8831e-09	5.33445e-09	3.30688e-08
1116	42587	STAG1	MS1	Lymphoblastoid	Blood	1.77391e-07	1.78928e-06	1.82176e-09	5.40428e-09	3.34717e-08
1117	63034	PRDM10	HEK293	Epithelium	Embryonic Kidney	5.70489e-09	5.55569e-05	2.64572e-09	5.42226e-09	3.3553e-08
1118	42312	STAG1	GM12890	Lymphoblastoid	Blood	1.71718e-07	4.32401e-07	1.86414e-09	5.50887e-09	3.40584e-08
1119	63975	GATA4	HepG2	Epithelium	Liver	5.74911e-09	7.22761e-08	2.83789e-09	5.55401e-09	3.43068e-08
1120	49036	ERCC6	None	Fibroblast	Skin	4.32771e-09	1.81775e-08	4.11402e-09	5.66943e-09	3.49885e-08
1121	42927	NIPBL	GP5d	None	Colon	1.3852e-08	3.75297e-09	5.30453e-09	5.69082e-09	3.50891e-08
1122	45649	RFX5	GM12878	B Lymphocyte	Blood	1.94774e-08	3.52407e-09	5.37033e-09	5.75471e-09	3.54515e-08
1123	3272	GATA1	None	Proerythroblast	Bone Marrow	6.84217e-08	2.3871e-09	1.34424e-08	5.90637e-09	3.63534e-08
1124	67771	TAL1	F5	Erythroid Progenitor Cell	Fetal Liver	7.81396e-07	2.03616e-09	1.61857e-06	6.08497e-09	3.73897e-08
1125	46001	MYC	MCF-10A	Epithelium	Breast	2.97112e-09	1.80401e-08	9.90457e-09	6.08557e-09	3.73897e-08
1126	68976	ESR1	T47D	None	Breast	6.8077e-09	1.36608e-08	3.70464e-09	6.12212e-09	3.75809e-08
1127	74358	OTX2	D-341	None	None	4.52039e-09	4.82062e-09	2.41722e-08	6.38254e-09	3.91447e-08
1128	43102	RBPJ	CUTLL1	T Lymphocyte	Blood	1.68948e-08	5.22381e-09	4.65875e-09	6.44786e-09	3.95103e-08
1129	75274	ZBTB48	U2OS	None	None	1.52296e-08	9.09255e-08	2.58508e-09	6.47257e-09	3.96266e-08
1130	38758	JUND	LoVo	None	Colon	3.60515e-09	4.58397e-07	5.49073e-09	6.4979e-09	3.97464e-08
1131	63883	BCL3	A549	Epithelium	Lung	2.2488e-08	8.05122e-09	3.45628e-09	6.5502e-09	4.00309e-08
1132	50039	FOXA1	LNCaP	Epithelium	Prostate	3.88605e-09	4.50589e-07	5.43188e-09	6.76211e-09	4.12895e-08
1133	45886	NRF1	K562	Erythroblast	Bone Marrow	1.03777e-08	4.85853e-09	7.24168e-09	6.81395e-09	4.15693e-08
1134	63825	GLIS2	HEK293	Epithelium	Embryonic Kidney	1.01396e-08	3.11331e-06	2.97327e-09	6.8922e-09	4.20096e-08
1135	47102	MYC	HeLa	Epithelium	Cervix	1.07424e-08	1.1208e-08	4.39342e-09	7.31842e-09	4.45682e-08
1136	63525	ZFP2	HEK293	Epithelium	Embryonic Kidney	4.64907e-09	1.05167e-07	5.98121e-09	7.65705e-09	4.65894e-08
1137	53301	FLI1	TSU-1621-MT	None	None	9.8575e-09	2.41388e-05	3.47338e-09	7.70434e-09	4.68359e-08
1138	74673	RUVBL1	HepG2	Epithelium	Liver	3.81918e-08	4.06852e-09	9.8453e-09	8.03117e-09	4.87798e-08
1139	46116	PAX5	GM12878	B Lymphocyte	Blood	9.36363e-08	8.6751e-09	4.07898e-09	8.08383e-09	4.90566e-08
1140	46212	FOSL1	HCT-116	None	Colon	4.42347e-08	1.69915e-06	2.89847e-09	8.14763e-09	4.94004e-08
1141	76811	NEUROG2	None	Fibroblast	Fetal Lung	3.63353e-08	3.08005e-09	1.04744e-07	8.29329e-09	5.02394e-08
1142	56351	CDK8	MOLM-14	Myeloid Cell	None	2.54464e-08	4.44232e-09	1.27865e-08	8.75623e-09	5.29974e-08
1143	46279	USF1	K562	Erythroblast	Bone Marrow	3.35475e-08	2.88161e-05	3.23257e-09	8.84449e-09	5.34848e-08
1144	75560	BRD4	None	None	Retina	1.04355e-08	1.15639e-08	6.54727e-09	8.9542e-09	5.41009e-08
1145	67712	FOXA1	LNCaP	Epithelium	Prostate	1.74648e-08	1.26825e-08	5.16263e-09	9.09624e-09	5.49111e-08
1146	50077	ZFX	Daoy	Polygonal	Cerebellum	7.80938e-09	6.13185e-09	2.71922e-08	9.14887e-09	5.51806e-08
1147	74359	OTX2	D-341	None	None	4.47854e-09	1.12278e-08	9.7572e-08	9.29943e-09	5.60398e-08
1148	46134	FOXM1	GM12878	B Lymphocyte	Blood	4.29295e-06	3.2216e-09	1.7109e-06	9.63943e-09	5.80381e-08
1149	46229	ZBTB33	HepG2	Epithelium	Liver	4.75295e-09	1.50108e-08	3.00134e-08	9.66705e-09	5.81538e-08
1150	45674	RELA	GM18951	Lymphoblastoid	Blood	1.13075e-07	4.82182e-08	3.65072e-09	9.88465e-09	5.93417e-08
1151	56045	GABPA	HepG2	Epithelium	Liver	1.39549e-08	3.38634e-06	4.32061e-09	9.88782e-09	5.93417e-08
1152	73510	BRD4	SUM159PT	mammary carcinoma cell line	Breast	2.67957e-08	1.24353e-06	3.77068e-09	9.89029e-09	5.93417e-08
1153	1208	DDX5	HeLa	Epithelium	Cervix	6.23257e-08	7.53201e-09	6.75942e-09	1.01094e-08	6.06022e-08
1154	72857	TRAF7	None	None	meningioma	1.02665e-08	1.40835e-08	7.80667e-09	1.01179e-08	6.06022e-08
1155	63685	ZBTB8A	HEK293	Epithelium	Embryonic Kidney	9.86429e-09	3.6941e-07	5.44178e-09	1.04222e-08	6.2371e-08
1156	35845	CTCF	GM19239	Lymphoblastoid	Blood	1.09284e-07	8.52438e-05	3.59946e-09	1.04536e-08	6.25048e-08
1157	63155	GABP	HepG2	Epithelium	Liver	1.50419e-08	2.12069e-07	4.72932e-09	1.06141e-08	6.34093e-08
1158	68712	BRD4	IMR90	None	None	3.57242e-08	8.12925e-09	8.0196e-09	1.08814e-08	6.49502e-08
1159	48344	SNAI2	None	Keratinocyte	None	1.11912e-08	2.35346e-08	6.99136e-09	1.09139e-08	6.50876e-08
1160	64797	CREM	HepG2	Epithelium	Liver	9.06396e-09	2.40274e-08	8.22058e-09	1.09652e-08	6.53377e-08
1161	53254	FOXM1	HEK293	Epithelium	Embryonic Kidney	2.58865e-08	8.80796e-09	8.31004e-09	1.10092e-08	6.55429e-08
1162	47414	GABPA	Jurkat	T Lymphocyte	Blood	3.43942e-08	5.99221e-08	4.4232e-09	1.10358e-08	6.56448e-08
1163	49243	ETS1	PANC-1	None	Pancreas	4.51616e-08	6.21446e-09	1.13367e-08	1.10592e-08	6.57277e-08
1164	55337	SUMO2	K562	Erythroblast	Bone Marrow	4.74297e-07	0.000107129	3.7219e-09	1.10784e-08	6.5785e-08
1165	46241	MYBL2	HepG2	Epithelium	Liver	1.42108e-08	1.61532e-08	7.50239e-09	1.12966e-08	6.70091e-08
1166	46093	FOXM1	ECC-1	Epithelium	Endometrium	5.85555e-08	1.56553e-08	5.42179e-09	1.13039e-08	6.70091e-08
1167	72625	ETS1	None	Endothelial Cell	Umbilical Vein	1.63752e-08	1.86034e-08	6.7256e-09	1.13849e-08	6.74314e-08
1168	48443	KDM6B	BJ	Fibroblast	Skin	7.32751e-07	4.13083e-09	5.97019e-08	1.15297e-08	6.82308e-08
1169	64802	BCL3	A549	Epithelium	Lung	8.85491e-08	2.95009e-08	4.7443e-09	1.17201e-08	6.92982e-08
1170	52427	MYC	HEK293	Epithelium	Embryonic Kidney	4.52307e-08	8.87397e-09	8.5076e-09	1.18887e-08	7.02349e-08
1171	62671	ATF1	K562	Erythroblast	Bone Marrow	1.88668e-08	5.58083e-08	5.63741e-09	1.20818e-08	7.13144e-08
1172	64668	NRF1	HepG2	Epithelium	Liver	1.77197e-08	8.22033e-08	5.64382e-09	1.22058e-08	7.19852e-08
1173	33459	ERG	None	Hematopoietic Cell	None	1.05447e-07	0.00559343	4.32073e-09	1.2452e-08	7.33742e-08
1174	63200	BCL3	A549	Epithelium	Lung	4.90206e-08	5.45806e-09	2.73076e-08	1.24878e-08	7.35227e-08
1175	45682	MAX	H1	Embryonic Stem Cell	Embryo	1.10574e-08	8.26085e-07	6.79438e-09	1.25613e-08	7.38926e-08
1176	68869	FOXA1	MCF-7	Embryonic Stem Cell	Breast	4.8131e-08	2.6801e-06	4.66582e-09	1.27402e-08	7.48813e-08
1177	42179	MITF	COLO-829	Fibroblast	Skin	2.10661e-08	1.80045e-07	5.65323e-09	1.30484e-08	7.66273e-08
1178	46350	FOXM1	SK-N-SH	Neuroblastoma cell	Brain	1.77993e-07	5.57556e-09	2.28643e-08	1.31171e-08	7.69657e-08
1179	37945	ETS1	None	Endothelial Cell	Umbilical Vein	1.86998e-08	2.63538e-08	7.34376e-09	1.31815e-08	7.72527e-08
1180	46144	MEF2C	GM12878	B Lymphocyte	Blood	4.05145e-07	4.57854e-09	1.51647e-07	1.31884e-08	7.72527e-08
1181	45947	NELFE	K562	Erythroblast	Bone Marrow	1.31446e-08	1.35695e-08	1.34206e-08	1.33759e-08	7.82846e-08
1182	63306	CREB1	HepG2	Epithelium	Liver	4.47684e-08	3.13964e-07	5.11538e-09	1.3574e-08	7.93767e-08
1183	67536	BRD4	HCT-15	Epithelium	Colon	1.73964e-08	2.01909e-08	8.80555e-09	1.36008e-08	7.94664e-08
1184	2095	NFYB	K562	Erythroblast	Bone Marrow	3.47352e-08	2.9822e-08	6.43445e-09	1.37782e-08	8.04349e-08
1185	2078	JUN	K562	Erythroblast	Bone Marrow	6.46277e-08	2.064e-06	4.96575e-09	1.38034e-08	8.04463e-08
1186	45874	JUN	K562	Erythroblast	Bone Marrow	6.46277e-08	2.064e-06	4.96575e-09	1.38034e-08	8.04463e-08
1187	67929	SPI1	None	Macrophage	Blood	8.29972e-07	0.000258374	4.6371e-09	1.38338e-08	8.05551e-08
1188	42482	STAG1	GM19239	Lymphoblastoid	Blood	4.60012e-07	2.77301e-06	4.68194e-09	1.38811e-08	8.07627e-08
1189	50021	BMI1	K562	Erythroblast	Bone Marrow	3.60706e-08	7.28725e-09	2.05131e-08	1.40385e-08	8.16096e-08
1190	71067	GATAD2B	HeLa	Epithelium	Cervix	3.22488e-08	8.31432e-07	5.55075e-09	1.41265e-08	8.20521e-08
1191	63210	MAZ	HEK293	Epithelium	Embryonic Kidney	1.13368e-08	1.32353e-06	8.20472e-09	1.42285e-08	8.25752e-08
1192	46022	TCF7L2	PANC-1	None	Pancreas	1.40982e-08	1.59392e-08	1.75036e-08	1.57232e-08	9.11735e-08
1193	52428	MYC	HEK293	Epithelium	Embryonic Kidney	2.08585e-08	2.28722e-08	1.0337e-08	1.59233e-08	9.22565e-08
1194	45634	ZNF384	GM12878	B Lymphocyte	Blood	7.55873e-07	5.45956e-09	8.60722e-07	1.61595e-08	9.35462e-08
1195	55492	RUNX1	None	Myeloid Cell	None	2.03412e-08	3.11868e-07	7.54033e-09	1.62173e-08	9.38023e-08
1196	45871	ATF1	K562	Erythroblast	Bone Marrow	1.99954e-07	4.7419e-07	5.75842e-09	1.65958e-08	9.59114e-08
1197	42762	GMEB2	LoVo	None	Colon	2.33584e-08	1.14942e-08	2.0223e-08	1.67355e-08	9.66378e-08
1198	67738	FOXA1	LNCaP	Epithelium	Prostate	4.16556e-08	3.8933e-07	6.88546e-09	1.74613e-08	1.00745e-07
1199	52681	FOXA2	CyT49	Embryonic Stem Cell	Embryo	2.93165e-08	2.88368e-07	7.7324e-09	1.79744e-08	1.03619e-07
1200	45992	CTCF	MCF-7	Epithelium	Breast	1.4013e-07	0.00147725	6.30785e-09	1.81083e-08	1.04304e-07
1201	46232	JUND	HepG2	Epithelium	Liver	9.41261e-08	9.28248e-05	6.4701e-09	1.81607e-08	1.04519e-07
1202	45823	RFX5	HepG2	Epithelium	Liver	2.20046e-08	1.74727e-08	1.6403e-08	1.83327e-08	1.05365e-07
1203	9509	TFAP2C	MDA-MB-453	Epithelium	Mammary Gland	6.81661e-08	0.000133451	6.71528e-09	1.83383e-08	1.05365e-07
1204	43065	BRD4	HEK293T	Epithelium	Embryonic Kidney	2.39029e-08	1.3325e-08	2.15329e-08	1.83684e-08	1.05393e-07
1205	39484	FOXM1	MCF-7	Epithelium	Breast	1.33294e-08	2.22336e-08	2.31063e-08	1.83737e-08	1.05393e-07
1206	62609	H2AFZ	MCF-7	Epithelium	Breast	4.14146e-08	3.01674e-07	7.54983e-09	1.87601e-08	1.0752e-07
1207	45758	NFYB	HeLa-S3	Epithelium	Cervix	1.70392e-07	1.90165e-08	9.94357e-09	1.88653e-08	1.08034e-07
1208	57960	JMJD1C	Kasumi-1	Myeloblast	Blood	2.3103e-07	5.7394e-07	6.64975e-09	1.91752e-08	1.09718e-07
1209	36301	BRD4	None	T Lymphocyte	Blood	6.6724e-08	4.83171e-08	8.3304e-09	1.92646e-08	1.10138e-07
1210	45969	IRF1	K562	Erythroblast	Bone Marrow	1.25612e-07	1.56385e-08	1.2101e-08	1.9412e-08	1.10889e-07
1211	65129	ZNF341	HEK293	Epithelium	Embryonic Kidney	9.65712e-09	1.4924e-07	2.59901e-08	2.01711e-08	1.1513e-07
1212	38742	NFATC1	None	Endothelial Cell	Umbilical Vein	7.11242e-08	3.47911e-08	9.60195e-09	2.04153e-08	1.16428e-07
1213	45611	USF2	GM12878	B Lymphocyte	Blood	3.48977e-08	1.37731e-08	2.2943e-08	2.07116e-08	1.1802e-07
1214	33720	MYC	BJ	Fibroblast	Skin	2.80464e-08	4.05343e-08	1.2002e-08	2.08848e-08	1.18909e-07
1215	49980	BRD4	90-8TL	Schwann Cell	Brain	4.19273e-08	3.21588e-08	1.1562e-08	2.12109e-08	1.20666e-07
1216	68783	BRD4	HCT-116	Colon cancer cell	Colon	1.07356e-07	1.74129e-08	1.37729e-08	2.15286e-08	1.22373e-07
1217	68932	KDM5C	ZR-75-30	None	None	5.25602e-08	1.76033e-08	1.67144e-08	2.21138e-08	1.25596e-07
1218	57806	BRD3	LX2	Hepatic Stellate Cell	None	1.14128e-07	1.31821e-08	1.98944e-08	2.22407e-08	1.26213e-07
1219	53251	FOXM1	HEK293	Epithelium	Embryonic Kidney	9.4044e-08	1.99551e-08	1.49733e-08	2.35237e-08	1.33384e-07
1220	64270	H2AFZ	MM.1S	B Lymphoblast	Blood	3.61761e-07	8.96675e-09	7.98037e-08	2.36559e-08	1.34024e-07
1221	48778	MYC	P493-6	B cell lymphoma	None	4.90955e-08	1.33806e-08	3.19652e-08	2.37365e-08	1.34371e-07
1222	64266	HCFC1	MCF-7	Epithelium	Breast	6.86059e-08	4.58675e-08	1.14028e-08	2.41789e-08	1.36763e-07
1223	56122	AR	None	None	Prostate	1.15529e-08	5.89263e-08	4.90127e-08	2.4207e-08	1.3681e-07
1224	64092	KLF8	HEK293	Epithelium	Embryonic Kidney	1.02483e-07	4.00183e-06	8.82494e-09	2.43264e-08	1.37373e-07
1225	64691	CBFB	GM12878	B Lymphocyte	Blood	5.56276e-08	1.20707e-08	4.71196e-08	2.45812e-08	1.38698e-07
1226	76851	ZMYND8	HEK293	Epithelium	Embryonic Kidney	1.44249e-08	7.43709e-08	2.66644e-08	2.49431e-08	1.40625e-07
1227	52429	MYC	HEK293	Epithelium	Embryonic Kidney	1.30786e-07	1.76889e-08	1.79645e-08	2.50326e-08	1.41015e-07
1228	36958	TFAP2A	None	Neural crest cell	Cranial	1.97069e-08	0.000105996	1.59575e-08	2.64504e-08	1.4888e-07
1229	57115	LEF1	RL95-2	None	Uterus	5.30223e-08	2.13488e-08	2.17288e-08	2.68521e-08	1.51019e-07
1230	64112	SMARCA4	K562	Erythroblast	Bone Marrow	4.60729e-08	2.69058e-08	2.07513e-08	2.80214e-08	1.57466e-07
1231	76999	PITX3	SH-SY5Y	Neuron	Midbrain	4.59593e-08	1.37575e-08	8.64556e-08	2.82985e-08	1.58895e-07
1232	39782	RUNX1	Kasumi-1	Myeloblast	Blood	6.69848e-07	1.30419e-08	3.70462e-08	2.85274e-08	1.6005e-07
1233	62965	EED	GM12878	B Lymphocyte	Blood	4.82284e-07	1.03342e-08	2.20123e-07	2.90184e-08	1.62673e-07
1234	8793	RBBP5	K562	Erythroblast	Bone Marrow	3.19992e-08	3.02826e-08	2.60678e-08	2.92299e-08	1.63725e-07
1235	39372	ETV1	LNCaP	Epithelium	Prostate	5.67605e-08	8.57455e-08	1.36753e-08	2.92955e-08	1.6396e-07
1236	45683	GTF2F1	H1	Embryonic Stem Cell	Embryo	3.22699e-08	2.4948e-08	3.4041e-08	2.98661e-08	1.67018e-07
1237	76205	AR	None	Fibroblast	Prostate	2.0532e-08	4.77109e-08	3.31325e-08	3.00463e-08	1.6789e-07
1238	46248	USF1	HepG2	Epithelium	Liver	5.60395e-08	5.69107e-05	1.24138e-08	3.04824e-08	1.70055e-07
1239	46065	YY1	A549	Epithelium	Lung	5.14737e-08	2.32274e-08	2.78276e-08	3.0483e-08	1.70055e-07
1240	63302	NKRF	K562	Erythroblast	Bone Marrow	2.97614e-08	5.35375e-08	2.192e-08	3.06436e-08	1.70814e-07
1241	49448	EGLN2	T47D	Epithelium	Mammary Gland	6.38038e-08	1.17168e-05	1.21959e-08	3.06894e-08	1.70931e-07
1242	76206	AR	None	Fibroblast	Prostate	2.2625e-08	1.96841e-07	2.07803e-08	3.08003e-08	1.7129e-07
1243	45925	IRF1	K562	Erythroblast	Bone Marrow	1.19803e-07	1.29076e-08	8.64233e-08	3.08035e-08	1.7129e-07
1244	34473	PAX5	Raji	B Lymphocyte	Blood	5.88974e-07	1.05784e-08	1.32935e-06	3.09334e-08	1.71874e-07
1245	45777	RCOR1	HeLa-S3	Epithelium	Cervix	1.14142e-06	1.25455e-08	7.23924e-08	3.17799e-08	1.76436e-07
1246	34394	MECP2	IMR90	Fibroblast	Lung	2.31897e-08	3.40758e-08	4.57592e-08	3.18058e-08	1.76438e-07
1247	50699	GTF2I	None	Fibroblast	None	2.29347e-08	5.87399e-08	2.97828e-08	3.18462e-08	1.76521e-07
1248	63686	ZBTB8A	HEK293	Epithelium	Embryonic Kidney	2.53207e-08	7.54703e-07	1.93759e-08	3.24574e-08	1.79764e-07
1249	59001	JMJD1C	HL-60	Promyeloblast	Blood	9.1439e-06	1.40868e-05	1.10253e-08	3.30104e-08	1.8268e-07
1250	52158	FAIRE	None	Macrophage	None	6.87202e-08	5.30347e-08	1.74379e-08	3.30565e-08	1.82789e-07
1251	38389	BRD4	None	T Lymphocyte	Blood	1.0318e-07	3.62846e-08	1.90165e-08	3.33936e-08	1.84506e-07
1252	64692	CBFB	GM12878	B Lymphocyte	Blood	6.91677e-08	2.28371e-08	3.35805e-08	3.40811e-08	1.88154e-07
1253	72347	BRD4	Gen2.2	Plasmacytoid dendritic cell	None	4.03442e-08	3.16301e-08	3.44609e-08	3.51204e-08	1.93737e-07
1254	42295	STAG1	GM12878	B Lymphocyte	Blood	1.04327e-06	7.57436e-05	1.19017e-08	3.5297e-08	1.94556e-07
1255	43561	RNF2	None	Epithelium	Mammary Gland	2.93999e-08	3.34644e-08	5.18764e-08	3.60695e-08	1.98655e-07
1256	65114	ZNF121	HEK293	Epithelium	Embryonic Kidney	3.29898e-06	1.21515e-08	6.86882e-06	3.62569e-08	1.99528e-07
1257	63826	GLIS2	HEK293	Epithelium	Embryonic Kidney	5.19199e-08	3.40598e-06	1.68369e-08	3.80001e-08	2.08955e-07
1258	76527	EPC1	K562	Lymphoblast	None	4.49272e-08	3.18963e-08	3.98469e-08	3.81166e-08	2.09429e-07
1259	74429	ELF1	None	Colorectal cancer cell line	None	1.01492e-07	2.59455e-08	3.31787e-08	3.81995e-08	2.09718e-07
1260	74688	GRHL3	NHEK	Keratinocyte	Skin	6.67893e-08	1.85452e-05	1.58244e-08	3.83534e-08	2.10396e-07
1261	71747	SOX4	None	Fibroblast	Fetal Lung	8.22075e-08	8.78993e-06	1.51799e-08	3.83853e-08	2.10404e-07
1262	62819	NRF1	MCF-7	Epithelium	Breast	4.52787e-08	3.86775e-08	3.33601e-08	3.85029e-08	2.10881e-07
1263	46314	GABPA	MCF-7	Epithelium	Breast	2.81462e-07	8.87058e-08	1.59975e-08	3.87917e-08	2.12295e-07
1264	47578	TTF1	NCI-H441	Epithelium	Lung	3.3886e-08	1.22359e-06	2.23545e-08	3.99671e-08	2.18554e-07
1265	63902	ZXDB	HEK293	Epithelium	Embryonic Kidney	3.68861e-08	4.30364e-07	2.36378e-08	4.18182e-08	2.28496e-07
1266	77299	TRIM25	BT-549	None	Breast	2.44552e-07	0.0108336	1.48176e-08	4.19132e-08	2.28834e-07
1267	72094	RUNX1	NB4	Leukemic cells	None	8.63874e-07	0.000108155	1.44089e-08	4.2512e-08	2.3192e-07
1268	54511	MYC	MCF-10A	Epithelium	Breast	1.75193e-07	2.61034e-08	3.86547e-08	4.29263e-08	2.33996e-07
1269	55467	NELFA	HeLa	Epithelium	Cervix	7.57251e-08	2.75752e-08	5.06169e-08	4.33361e-08	2.36043e-07
1270	1085	SMAD3	H9	Embryonic Stem Cell	Embryo	5.37185e-08	6.26795e-08	2.96156e-08	4.39009e-08	2.38932e-07
1271	48632	IRF4	H929	B Lymphocyte	Bone Marrow	2.46586e-07	3.85598e-08	2.62925e-08	4.41028e-08	2.39842e-07
1272	74637	NRF1	MCF-7	None	None	5.78692e-08	2.79478e-08	7.12603e-08	4.47131e-08	2.42853e-07
1273	34929	SPI1	None	Monocyte	None	6.11936e-06	1.23731e-06	1.51281e-08	4.47268e-08	2.42853e-07
1274	37596	TAL1	ME-1	Leukemia Cell	None	9.47785e-08	2.40208e-05	1.83979e-08	4.61918e-08	2.5061e-07
1275	38182	MYC	FB0167P	Fibroblast	None	7.81908e-08	3.33257e-08	4.91802e-08	4.75214e-08	2.57622e-07
1276	42332	STAG1	GM12891	Lymphoblastoid	Blood	1.48366e-06	3.35443e-05	1.60968e-08	4.77494e-08	2.58655e-07
1277	46293	CTCFL	K562	Erythroblast	Bone Marrow	6.40867e-08	3.05496e-07	2.3142e-08	4.8318e-08	2.6153e-07
1278	50517	NIPBL	Ramos	B Lymphocyte	None	1.94282e-07	2.01551e-08	1.78847e-07	4.97069e-08	2.68837e-07
1279	1992	FOS	K562	Erythroblast	Bone Marrow	6.6203e-08	1.73389e-07	2.60051e-08	5.05677e-08	2.73066e-07
1280	45959	FOS	K562	Erythroblast	Bone Marrow	6.6203e-08	1.73389e-07	2.60051e-08	5.05677e-08	2.73066e-07
1281	45879	MXI1	K562	Erythroblast	Bone Marrow	1.39178e-07	7.69823e-08	2.75593e-08	5.31346e-08	2.86703e-07
1282	35474	NKX2-1	NCI-H3122	None	Lung	6.88376e-08	3.01207e-05	2.41531e-08	5.36071e-08	2.88986e-07
1283	73407	RBPJ	None	Neurosphere	None	6.04878e-08	3.44001e-07	2.74065e-08	5.36414e-08	2.88986e-07
1284	52303	BCL6	None	T Lymphocyte	Tonsil	3.04604e-07	2.4503e-08	9.72966e-08	5.51754e-08	2.96976e-07
1285	62937	ZBTB40	GM12878	B Lymphocyte	Blood	4.32885e-07	2.14894e-08	1.82049e-07	5.52104e-08	2.96976e-07
1286	46357	ZBTB33	SK-N-SH	Neuroblastoma cell	Brain	2.58332e-07	2.88139e-08	6.37044e-08	5.52752e-08	2.97093e-07
1287	1313	PHF8	HeLa	Epithelium	Cervix	7.29249e-08	4.64541e-08	5.62247e-08	5.65769e-08	3.03854e-07
1288	43447	TAL1	None	Proerythroblast	Bone Marrow	1.05147e-05	1.96417e-08	2.26937e-05	5.87644e-08	3.15357e-07
1289	64800	BCL3	A549	Epithelium	Lung	1.71438e-07	1.79789e-07	2.64518e-08	6.09759e-08	3.26971e-07
1290	67713	FOXA1	LNCaP	Epithelium	Prostate	2.33101e-07	2.40509e-08	3.23692e-07	6.12773e-08	3.28332e-07
1291	73712	AFF1	SEM	B Lymphocyte	None	2.97855e-08	2.86768e-06	7.01133e-08	6.22604e-08	3.33342e-07
1292	44094	ETS1	None	T Lymphocyte	Blood	1.00812e-07	5.53148e-08	4.96947e-08	6.23432e-08	3.33527e-07
1293	63791	RNF2	HepG2	Epithelium	Liver	5.11661e-08	9.36923e-08	5.61067e-08	6.24471e-08	3.33824e-07
1294	65203	YY1	HEK293	Epithelium	Embryonic Kidney	6.30482e-08	5.66779e-07	3.34514e-08	6.31321e-08	3.37225e-07
1295	46098	USF1	ECC-1	Epithelium	Endometrium	2.34667e-07	5.31212e-05	2.42451e-08	6.58971e-08	3.51722e-07
1296	75288	ZBTB48	HeLa	None	None	4.60812e-08	9.55357e-07	4.45484e-08	6.6379e-08	3.54021e-07
1297	75285	ZBTB48	HeLa	None	None	2.8616e-08	5.73206e-07	1.21258e-07	6.67603e-08	3.5578e-07
1298	45609	IRF3	GM12878	B Lymphocyte	Blood	7.70384e-07	6.08328e-08	4.04306e-08	7.06376e-08	3.76153e-07
1299	70928	RBBP4	T98G	Glioblastoma cell	None	4.82022e-08	6.97853e-08	1.53254e-07	7.21141e-08	3.8372e-07
1300	46078	USF1	A549	Epithelium	Lung	1.41956e-07	8.45186e-07	3.01733e-08	7.25172e-08	3.85568e-07
1301	72426	ORC2	K562	Erythroblast	Bone Marrow	2.08585e-07	6.28891e-08	4.88657e-08	7.28872e-08	3.87238e-07
1302	54513	MYC	MCF-10A	Epithelium	Breast	2.26582e-07	3.62676e-08	1.1005e-07	7.30407e-08	3.87755e-07
1303	565	VDR	GM10861	Lymphocyte	Blood	4.43493e-07	2.66615e-08	9.40701e-07	7.34842e-08	3.89811e-07
1304	45916	BHLHE40	K562	Erythroblast	Bone Marrow	7.25804e-07	4.96809e-06	2.56114e-08	7.38476e-08	3.91438e-07
1305	70761	HDAC3	MM1.S	B Lymphocyte	Blood	1.5404e-07	3.77472e-08	1.4273e-07	7.50186e-08	3.9734e-07
1306	49484	MED1	None	Myoblast	None	8.10751e-08	6.20184e-07	3.87249e-08	7.5434e-08	3.99234e-07
1307	69819	NELFE	MCF-7	Human Breast Cancer Cell	Breast	1.56765e-07	5.82257e-08	6.19088e-08	7.55547e-08	3.99567e-07
1308	68229	NR3C1	BEAS-2B	Epithelium	Lung	1.02273e-07	2.67988e-07	3.89665e-08	7.65846e-08	4.04704e-07
1309	46156	SPI1	GM12891	Lymphoblastoid	Blood	6.50148e-07	2.75234e-07	2.98976e-08	7.76822e-08	4.10191e-07
1310	48343	SNAI2	None	Keratinocyte	None	8.09286e-08	4.64555e-07	4.77766e-08	8.46503e-08	4.46643e-07
1311	4611	TAL1	None	Proerythroblast	Bone Marrow	2.13698e-07	4.12896e-08	1.59009e-07	8.52572e-08	4.49502e-07
1312	64916	CBX1	K562	Erythroblast	Bone Marrow	2.42766e-07	1.17316e-06	3.33124e-08	8.57377e-08	4.51691e-07
1313	76468	PHF2	None	N8-CTx	None	6.90146e-08	9.04128e-08	1.07921e-07	8.61671e-08	4.53608e-07
1314	42551	STAG1	GM2610	Lymphoblastoid	Blood	2.00727e-06	1.60558e-05	2.93796e-08	8.67111e-08	4.56124e-07
1315	5045	CTCF	GM12892	Lymphoblastoid	Blood	3.8814e-07	0.000182668	3.14444e-08	8.72498e-08	4.58609e-07
1316	69881	CDK9	None	Th1	None	3.20415e-07	9.94668e-08	4.93445e-08	8.97123e-08	4.71005e-07
1317	42219	STAT3	SU-DHL6	B Lymphocyte	Lymph Node	7.45884e-07	3.41601e-08	3.55411e-07	8.97444e-08	4.71005e-07
1318	69810	NELFE	MCF-7	Human Breast Cancer Cell	Breast	2.20006e-07	5.65431e-08	9.03858e-08	9.01046e-08	4.72536e-07
1319	57090	TRIM28	HCT-116	None	Colon	7.34692e-08	9.83859e-06	5.1678e-08	9.07348e-08	4.75481e-07
1320	71321	RAD21	HCT-116	Colon cancer cell	Colon	8.21703e-07	0.000251041	3.15e-08	9.10001e-08	4.7651e-07
1321	71746	SOX4	None	Fibroblast	Fetal Lung	1.7024e-07	6.06368e-07	3.94526e-08	9.12684e-08	4.77553e-07
1322	65086	ZSCAN16	HEK293	Epithelium	Embryonic Kidney	8.15426e-05	3.08112e-08	0.00146389	9.23968e-08	4.83091e-07
1323	46130	BCL3	GM12878	B Lymphocyte	Blood	1.12683e-06	1.23526e-05	3.18765e-08	9.27658e-08	4.84654e-07
1324	5195	YY1	None	T Lymphocyte	Blood	2.5122e-07	8.47977e-08	6.10325e-08	9.32892e-08	4.87021e-07
1325	33680	GATA3	None	Th2	None	1.47631e-07	4.86672e-08	2.43536e-07	9.54577e-08	4.97965e-07
1326	35740	FAIRE	MCF-7	Epithelium	Breast	1.12472e-07	2.25814e-06	4.6278e-08	9.6954e-08	5.05389e-07
1327	38778	SMC1A	LoVo	None	Colon	7.19842e-07	1.88538e-05	3.42482e-08	9.79086e-08	5.0998e-07
1328	46111	NFIC	GM12878	B Lymphocyte	Blood	2.94847e-06	3.33681e-08	5.37838e-06	9.83806e-08	5.12053e-07
1329	48279	CEBPA	GM12878	B Lymphocyte	Blood	1.72787e-07	8.75462e-08	7.88431e-08	1.00356e-07	5.21944e-07
1330	67717	FOXA1	LNCaP	Epithelium	Prostate	3.0974e-06	3.40936e-08	6.74535e-06	1.00664e-07	5.2315e-07
1331	59004	JMJD1C	NB4	Promyelocytic cell	Blood	1.27704e-05	1.90668e-05	3.53587e-08	1.05588e-07	5.48328e-07
1332	34995	FOXM1	MCF-7	Epithelium	Breast	8.60145e-07	6.19401e-08	9.50152e-08	1.0779e-07	5.59343e-07
1333	42519	STAG1	GM2255	Lymphoblastoid	Blood	4.80611e-06	2.09461e-05	3.63918e-08	1.08168e-07	5.60886e-07
1334	5050	CTCF	GM19239	Lymphoblastoid	Blood	1.21351e-06	8.46699e-05	3.86509e-08	1.12324e-07	5.81996e-07
1335	53599	RELA	None	Adipocyte	None	1.81742e-07	4.06854e-06	4.91126e-08	1.14901e-07	5.94903e-07
1336	58030	RUNX1	Kasumi-1	Myeloblast	Blood	1.93476e-06	1.90825e-06	4.05527e-08	1.16731e-07	6.03924e-07
1337	46125	RXRA	GM12878	B Lymphocyte	Blood	2.19943e-07	6.21223e-08	2.14672e-07	1.18567e-07	6.12965e-07
1338	33437	SMARCA4	None	None	Blood	2.19817e-07	6.01963e-07	5.30823e-08	1.19765e-07	6.18694e-07
1339	55164	VDR	LNCaP	Epithelium	Prostate	1.14132e-07	8.28066e-08	3.83156e-07	1.27942e-07	6.60447e-07
1340	43313	RELA	None	None	None	1.09117e-07	2.29612e-07	1.07926e-07	1.31664e-07	6.79152e-07
1341	55669	PAF1	HCT-116	None	Colon	5.37579e-07	2.45021e-07	6.1657e-08	1.35378e-07	6.97785e-07
1342	8532	VEZF1	HeLa-S3	Epithelium	Cervix	1.76931e-07	9.53363e-08	1.71327e-07	1.36501e-07	7.0305e-07
1343	65180	ZNF35	HEK293	Epithelium	Embryonic Kidney	7.4097e-07	5.17144e-08	9.78334e-07	1.38193e-07	7.11238e-07
1344	45736	BRCA1	HeLa-S3	Epithelium	Cervix	1.49996e-06	5.2176e-08	5.44413e-07	1.38444e-07	7.11997e-07
1345	67744	FOXA1	LNCaP	Epithelium	Prostate	5.92306e-08	6.78333e-06	2.21109e-07	1.3919e-07	7.15303e-07
1346	36028	RB1	None	Epithelium	Cervix	2.05039e-07	1.16361e-07	1.42197e-07	1.46316e-07	7.51365e-07
1347	56044	GABPA	HepG2	Epithelium	Liver	1.73916e-07	2.0812e-07	1.05526e-07	1.49766e-07	7.68512e-07
1348	75850	BRD4	Rh4	rhabdomyosarcoma	None	1.89542e-07	1.94251e-07	1.05021e-07	1.50408e-07	7.71231e-07
1349	74401	ESR1	MCF-7	None	Breast	2.54478e-07	2.47516e-06	6.44657e-08	1.51166e-07	7.74542e-07
1350	63411	CBX5	GM12878	B Lymphocyte	Blood	9.01665e-07	6.81784e-08	2.61399e-07	1.53045e-07	7.83593e-07
1351	72626	ETS1	None	Endothelial Cell	Umbilical Vein	1.25689e-07	8.78918e-07	9.88429e-08	1.56161e-07	7.98952e-07
1352	73449	RUNX1	MV4-11	AML cell line	None	7.04884e-06	1.60178e-05	5.30504e-08	1.57445e-07	8.04925e-07
1353	70810	MYC	HCT-116	Colon cancer cell	Colon	1.12069e-07	2.71011e-06	1.02715e-07	1.57664e-07	8.05451e-07
1354	65013	ELF1	K562	Erythroblast	Bone Marrow	4.84397e-07	1.17655e-07	1.23173e-07	1.60578e-07	8.1973e-07
1355	45741	USF2	HeLa-S3	Epithelium	Cervix	4.44551e-07	8.40928e-08	2.2324e-07	1.61112e-07	8.2185e-07
1356	63056	RAD21	None	None	Liver	5.0811e-06	0.00072215	5.44266e-08	1.61537e-07	8.23411e-07
1357	36320	RELA	GM15510	Lymphoblastoid	Blood	1.88103e-07	2.60819e-07	1.11991e-07	1.65933e-07	8.44657e-07
1358	65110	SP4	HEK293	Epithelium	Embryonic Kidney	3.05143e-07	5.04665e-05	6.76553e-08	1.6595e-07	8.44657e-07
1359	35268	SNAPC1	MCF-10A	Epithelium	Breast	1.56209e-07	1.59018e-07	1.90082e-07	1.6712e-07	8.4999e-07
1360	64094	CTBP1	MCF-7	Epithelium	Breast	1.7943e-07	2.14288e-07	1.35089e-07	1.70046e-07	8.64232e-07
1361	46171	USF1	H1	Embryonic Stem Cell	Embryo	1.36291e-07	0.0102802	9.82402e-08	1.71268e-07	8.69803e-07
1362	48997	AFF4	HeLa	Epithelium	Cervix	2.06773e-07	2.03201e-07	1.36982e-07	1.75874e-07	8.92542e-07
1363	41290	STAT1	None	Monocyte	Blood	4.4144e-07	1.96145e-07	1.12214e-07	1.84331e-07	9.34772e-07
1364	38785	NIPBL	LoVo	None	Colon	1.61994e-07	3.80942e-06	1.04879e-07	1.87848e-07	9.51909e-07
1365	65178	ZNF22	HEK293	Epithelium	Embryonic Kidney	0.000334727	6.3156e-08	0.00125437	1.89423e-07	9.59187e-07
1366	36077	MYOD1	None	None	Muscle	3.17223e-07	6.8718e-06	8.25273e-08	1.94615e-07	9.84756e-07
1367	46219	GABPA	HeLa-S3	Epithelium	Cervix	5.78708e-07	9.60558e-08	3.07945e-07	1.94983e-07	9.85899e-07
1368	52360	MYC	P493-6	B cell lymphoma	None	2.25522e-07	1.58169e-07	2.16848e-07	1.9521e-07	9.86325e-07
1369	62632	ZNF76	HEK293	Epithelium	Embryonic Kidney	1.4694e-07	4.50812e-07	1.57953e-07	1.9538e-07	9.86461e-07
1370	48317	ZBTB33	GM12878	B Lymphocyte	Blood	2.85576e-07	2.40853e-07	1.36872e-07	2.00539e-07	1.01177e-06
1371	47324	FOXA1	DU145	Epithelium	Prostate	1.09728e-06	7.88024e-08	8.22395e-07	2.02466e-07	1.02075e-06
1372	48993	AFF4	HeLa	Epithelium	Cervix	3.49099e-07	2.3244e-07	1.32676e-07	2.04028e-07	1.02787e-06
1373	4929	TAFII	H1	Embryonic Stem Cell	Embryo	5.47148e-07	1.27001e-07	2.08079e-07	2.0679e-07	1.04103e-06
1374	42760	FOXP1	LoVo	None	Colon	2.61802e-07	3.4852e-07	1.2813e-07	2.06989e-07	1.04127e-06
1375	50161	PR	None	None	Prostate	4.43527e-07	1.18911e-07	2.99465e-07	2.14231e-07	1.07692e-06
1376	46210	TEAD4	HCT-116	None	Colon	1.20618e-06	5.78694e-07	8.77597e-08	2.15025e-07	1.08013e-06
1377	42714	ETV5	LoVo	None	Colon	1.9897e-07	6.22859e-07	1.37452e-07	2.15724e-07	1.08285e-06
1378	48450	BRD4	MCF-7	Epithelium	Breast	2.48456e-07	2.2498e-07	2.04725e-07	2.24647e-07	1.12682e-06
1379	56817	NR2F1	None	Neural crest cell	Cranial	2.5125e-07	0.0471122	1.11609e-07	2.3184e-07	1.16206e-06
1380	53419	NCOR1	Kasumi-1	Myeloblast	Blood	1.08988e-06	1.3183e-07	2.3394e-07	2.34785e-07	1.17597e-06
1381	76529	MBTD1	K562	Lymphoblast	None	4.22381e-07	3.75868e-07	1.29883e-07	2.35714e-07	1.17976e-06
1382	46139	ZEB1	GM12878	B Lymphocyte	Blood	2.06543e-07	7.9007e-07	1.60844e-07	2.43417e-07	1.21744e-06
1383	32874	FAIRE	MCF7-LTED	Epithelium	Mammary Gland	2.46389e-07	5.29646e-07	1.66541e-07	2.51021e-07	1.25456e-06
1384	55563	MEF2B	None	B Lymphocyte	None	1.26658e-06	9.42171e-08	1.86449e-06	2.51264e-07	1.25487e-06
1385	47281	CTCF	SUM159PT	Epithelium	Mammary Gland	1.19235e-06	1.19244e-06	1.04162e-07	2.66012e-07	1.32756e-06
1386	45679	RELA	GM19193	Lymphoblastoid	Blood	1.77344e-06	7.07105e-07	1.08209e-07	2.67393e-07	1.33349e-06
1387	51542	POU5F1	HUES64	Embryonic Stem Cell	Embryo	2.23935e-07	2.84624e-07	3.1742e-07	2.69557e-07	1.34331e-06
1388	74655	USF2	HepG2	Epithelium	Liver	3.4629e-07	1.29598e-05	1.22644e-07	2.69817e-07	1.34364e-06
1389	36075	MYOD1	None	Myoblast	None	4.65088e-07	1.56169e-07	4.1034e-07	2.72964e-07	1.35834e-06
1390	63602	BCL3	A549	Epithelium	Lung	5.86288e-07	1.82991e-07	2.62677e-07	2.7329e-07	1.35898e-06
1391	53418	RUNX1	Kasumi-1	Myeloblast	Blood	1.83989e-06	5.48238e-06	9.88527e-08	2.76702e-07	1.37496e-06
1392	41301	IRF1	None	Monocyte	Blood	1.56317e-06	8.90022e-07	1.10632e-07	2.7772e-07	1.37902e-06
1393	64739	ZBTB33	K562	Erythroblast	Bone Marrow	1.23675e-05	9.38109e-08	0.00024678	2.79209e-07	1.38542e-06
1394	38737	MED1	LoVo	None	Colon	2.85892e-07	2.92519e-07	2.6486e-07	2.80584e-07	1.39125e-06
1395	38865	E2F2	LoVo	None	Colon	5.14169e-07	2.60614e-07	2.12615e-07	2.86115e-07	1.41765e-06
1396	53263	FOXM1	HEK293	Epithelium	Embryonic Kidney	6.07632e-07	2.44284e-07	2.13618e-07	2.87892e-07	1.42544e-06
1397	5042	CTCF	GM12891	Lymphoblastoid	Blood	2.48693e-06	0.000255445	1.00721e-07	2.90292e-07	1.43629e-06
1398	68627	KMT2D	None	patient derived xenograft cells	None	3.19283e-07	2.4094e-07	3.66453e-07	2.99662e-07	1.48159e-06
1399	36314	RELA	GM19099	Lymphoblastoid	Blood	3.09136e-06	1.16544e-07	9.17541e-07	3.00186e-07	1.48312e-06
1400	45882	UBTF	K562	Erythroblast	Bone Marrow	7.38217e-07	5.4596e-07	1.48085e-07	3.01838e-07	1.49022e-06
1401	70760	HDAC2	MM1.S	B Lymphocyte	Blood	5.00216e-07	2.62861e-07	2.4872e-07	3.05374e-07	1.5066e-06
1402	65014	ELF1	K562	Erythroblast	Bone Marrow	7.38669e-07	5.41239e-07	1.60774e-07	3.18427e-07	1.56988e-06
1403	38590	E2F7	IMR90	Fibroblast	Lung	6.33159e-07	1.75673e-07	4.94066e-07	3.22726e-07	1.58994e-06
1404	65057	TGIF2	HepG2	Epithelium	Liver	2.12187e-07	1.14427e-06	2.72018e-07	3.2387e-07	1.59444e-06
1405	64981	PATZ1	HEK293	Epithelium	Embryonic Kidney	1.97282e-07	9.58532e-05	2.42162e-07	3.25776e-07	1.60268e-06
1406	55722	SUMO2	VCaP	Epithelium	Prostate	2.39148e-07	7.81306e-05	2.02046e-07	3.28096e-07	1.61294e-06
1407	43082	CDK9	HEK293T	Epithelium	Embryonic Kidney	3.13144e-07	3.42529e-07	3.47064e-07	3.33549e-07	1.63834e-06
1408	46207	RAD21	HCT-116	None	Colon	6.59353e-06	0.00151822	1.13163e-07	3.33735e-07	1.63834e-06
1409	46312	SRF	MCF-7	Epithelium	Breast	1.01917e-06	4.83209e-07	1.74865e-07	3.421e-07	1.67821e-06
1410	5194	HMGN1	None	T Lymphocyte	Blood	8.12929e-07	2.05088e-07	3.88816e-07	3.45703e-07	1.69468e-06
1411	47776	CTCF	None	Erythroid Progenitor Cell	Blood	1.88629e-06	0.00161893	1.24381e-07	3.50034e-07	1.7147e-06
1412	38719	DLX1	LoVo	None	Colon	4.08008e-07	7.2759e-07	2.13385e-07	3.52456e-07	1.72534e-06
1413	55821	BRD4	TC-797	None	None	7.18306e-07	2.85316e-07	2.94877e-07	3.61956e-07	1.77059e-06
1414	64395	NR2C2	K562	Erythroblast	Bone Marrow	3.83416e-07	5.05112e-06	1.82961e-07	3.6268e-07	1.77288e-06
1415	56818	NR2F1	None	Neural crest cell	Cranial	3.68386e-07	8.68541e-05	1.84014e-07	3.67627e-07	1.79579e-06
1416	46343	NFIC	SK-N-SH	Neuroblastoma cell	Brain	7.4415e-07	1.7198e-07	1.01009e-06	3.68167e-07	1.79716e-06
1417	63689	GLIS1	HEK293	Epithelium	Embryonic Kidney	7.98841e-07	0.00152688	1.46764e-07	3.71925e-07	1.81422e-06
1418	73854	LMO1	Jurkat	T Lymphocyte	Blood	4.17782e-07	7.91413e-07	2.28121e-07	3.73098e-07	1.81866e-06
1419	47577	SMAD3	NCI-H441	Epithelium	Lung	3.17602e-07	4.48204e-05	2.07202e-07	3.75135e-07	1.8273e-06
1420	56369	CDK8	SET2	Megakaryoblastic	Blood	5.5381e-07	2.98825e-07	3.69644e-07	3.81804e-07	1.85847e-06
1421	64982	PATZ1	HEK293	Epithelium	Embryonic Kidney	2.76987e-07	7.92936e-06	2.47708e-07	3.85931e-07	1.87724e-06
1422	71013	MYC	None	Hematopoietic stem and progenitor cell	Bone Marrow	1.36434e-06	3.44873e-07	2.55439e-07	3.97488e-07	1.93079e-06
1423	46249	NR2F2	HepG2	Epithelium	Liver	2.05334e-07	4.38184e-06	4.08354e-07	3.97499e-07	1.93079e-06
1424	67317	SOX2	None	Neuronal Progenitor cell	None	3.63012e-07	1.05047e-06	2.64294e-07	4.00515e-07	1.94408e-06
1425	46092	SRF	ECC-1	Epithelium	Endometrium	1.10232e-06	2.36094e-07	4.35158e-07	4.03183e-07	1.95565e-06
1426	35228	HSF1	M0-91	Leukemia Cell	None	1.08899e-06	1.99986e-07	8.68637e-07	4.24336e-07	2.05681e-06
1427	76817	NEUROG2	None	Fibroblast	Fetal Lung	8.57515e-07	1.76642e-07	1.6263e-05	4.35488e-07	2.10939e-06
1428	64798	CREM	HepG2	Epithelium	Liver	4.17912e-07	2.68119e-06	2.43092e-07	4.36079e-07	2.11077e-06
1429	50382	TAL1	None	Proerythroblast	Fetal Liver	3.75598e-05	1.47862e-07	7.95757e-05	4.41031e-07	2.13325e-06
1430	64861	EGR2	HEK293	Epithelium	Embryonic Kidney	2.65859e-07	0.000103204	3.33922e-07	4.43408e-07	2.14287e-06
1431	45558	CTCF	A549	Epithelium	Lung	8.26816e-07	0.000362628	1.8018e-07	4.43641e-07	2.14287e-06
1432	52684	FOXA2	CyT49	Embryonic Stem Cell	Embryo	2.4803e-07	9.26476e-06	3.82566e-07	4.44205e-07	2.1441e-06
1433	46197	TAF1	H1	Embryonic Stem Cell	Embryo	5.45091e-07	9.56138e-07	2.61261e-07	4.47226e-07	2.15717e-06
1434	65116	FEZF1	HEK293	Epithelium	Embryonic Kidney	8.19879e-07	2.04756e-07	2.17718e-06	4.57117e-07	2.20334e-06
1435	48314	SPI1	GM12878	B Lymphocyte	Blood	0.000113831	1.535e-07	0.000186981	4.59502e-07	2.21329e-06
1436	64787	ZNF687	MCF-7	Epithelium	Breast	6.24628e-07	5.56974e-07	3.25739e-07	4.63943e-07	2.23313e-06
1437	48263	CEBPA	GM12878	B Lymphocyte	Blood	9.79882e-07	3.02293e-07	4.78062e-07	4.67263e-07	2.24755e-06
1438	45729	ELK1	HeLa-S3	Epithelium	Cervix	1.82015e-06	2.01559e-07	1.14902e-06	4.70142e-07	2.25982e-06
1439	53264	FOXM1	HEK293	Epithelium	Embryonic Kidney	1.06704e-06	3.8373e-07	3.53969e-07	4.71085e-07	2.26278e-06
1440	38691	RAD21	LoVo	None	Colon	5.67726e-06	0.000194508	1.64594e-07	4.79476e-07	2.30149e-06
1441	5188	GABPA	None	Haematopoietic Progenitor Cell	Blood	5.35616e-07	4.07111e-07	6.06505e-07	5.02333e-07	2.40953e-06
1442	63824	ETS1	None	iPSC	None	6.51156e-07	8.1801e-07	3.14102e-07	5.0489e-07	2.42011e-06
1443	55822	BRD4	TC-797	None	None	9.88791e-07	3.64646e-07	4.81647e-07	5.14586e-07	2.46488e-06
1444	70965	BRD4	Raji	B Lymphocyte	Blood	4.72465e-07	5.05424e-07	5.80566e-07	5.15681e-07	2.46841e-06
1445	44026	AGO1	PC-3	Epithelium	Prostate	2.50361e-06	3.17896e-07	4.59924e-07	5.24533e-07	2.50905e-06
1446	71670	CTCF	786-O	Epithelium	Kidney	1.67919e-06	0.000135929	2.00145e-07	5.35784e-07	2.56109e-06
1447	46173	NANOG	H1	Embryonic Stem Cell	Embryo	5.32079e-07	4.76085e-05	2.72352e-07	5.38393e-07	2.57178e-06
1448	45676	RELA	GM19099	Lymphoblastoid	Blood	2.13e-06	4.79589e-07	3.52911e-07	5.56774e-07	2.65775e-06
1449	35840	CTCF	NHEK	Keratinocyte	Skin	2.93277e-06	0.00560512	2.02244e-07	5.67573e-07	2.70556e-06
1450	8090	CTCF	NHEK	Keratinocyte	Skin	2.93277e-06	0.00560512	2.02244e-07	5.67573e-07	2.70556e-06
1451	41288	STAT1	None	Monocyte	Blood	2.72335e-06	2.19659e-06	2.28575e-07	5.77214e-07	2.74962e-06
1452	74643	NFATC3	HepG2	Epithelium	Liver	4.12032e-07	8.50306e-07	6.41702e-07	5.81238e-07	2.76688e-06
1453	33611	FAIRE	None	Endothelial Cell	Umbilical Vein	3.46773e-06	2.27158e-07	2.29396e-06	5.85192e-07	2.78379e-06
1454	64101	BCL3	A549	Epithelium	Lung	9.91201e-07	1.34057e-06	3.09038e-07	6.01121e-07	2.8576e-06
1455	57641	HDAC1	Nalm6	B cell precursor	Blood	4.82316e-07	1.22955e-06	4.92669e-07	6.10203e-07	2.89878e-06
1456	53468	KDM1A	SH-SY5Y	None	Bone Marrow	5.15648e-07	6.32175e-07	7.24967e-07	6.1218e-07	2.90617e-06
1457	58302	BCL6	None	B Lymphocyte	Tonsil	9.74941e-07	2.88745e-07	2.46634e-06	6.12943e-07	2.9078e-06
1458	46260	REST	HL-60	Promyeloblast	Blood	9.11902e-07	2.04904e-06	3.04665e-07	6.16405e-07	2.92222e-06
1459	33988	TET3	HEK293T	Epithelium	Embryonic Kidney	5.99674e-07	8.21296e-07	5.11524e-07	6.19822e-07	2.9364e-06
1460	74117	RUNX2	MCF-7	None	None	2.79374e-06	3.66744e-05	2.25904e-07	6.23458e-07	2.9516e-06
1461	74116	RUNX2	MCF-7	None	None	1.93134e-06	3.53517e-05	2.39087e-07	6.34433e-07	3.00151e-06
1462	65062	ZNF467	HEK293	Epithelium	Embryonic Kidney	3.25671e-07	6.56613e-06	6.65751e-07	6.34929e-07	3.0018e-06
1463	37608	MYH11	ME-1	Leukemia Cell	None	4.65588e-07	0.000154519	3.92534e-07	6.38047e-07	3.01448e-06
1464	46200	ZBTB33	HCT-116	None	Colon	2.61976e-06	2.96796e-07	1.0823e-06	6.41713e-07	3.02973e-06
1465	46243	FOSL2	HepG2	Epithelium	Liver	2.65842e-06	0.000398803	2.36081e-07	6.50125e-07	3.06735e-06
1466	32790	BRD4	P493-6	B cell lymphoma	None	3.35012e-06	3.12823e-07	9.01717e-07	6.51581e-07	3.07212e-06
1467	74318	MLLT1	MV4;11	Acute myeloid leukemia	None	6.37897e-07	5.87476e-07	7.58866e-07	6.53936e-07	3.08112e-06
1468	46119	SPI1	GM12878	B Lymphocyte	Blood	1.42529e-05	2.46976e-07	2.24316e-06	6.57184e-07	3.09354e-06
1469	67802	BRD4	SUM1315MO2	None	None	6.87262e-06	3.38612e-07	6.82955e-07	6.57467e-07	3.09354e-06
1470	68638	KMT2D	None	patient derived xenograft cells	None	5.65961e-06	2.99608e-07	1.00436e-06	6.65182e-07	3.12771e-06
1471	76415	PMEL	None	None	None	1.08092e-06	6.09729e-07	5.64269e-07	6.91656e-07	3.24998e-06
1472	64753	H2AFZ	None	Hepatocyte	None	1.03002e-06	7.9727e-07	4.76404e-07	6.93771e-07	3.25553e-06
1473	1308	PHF8	HeLa	Epithelium	Cervix	1.61739e-06	3.95891e-07	8.49037e-07	6.94117e-07	3.25553e-06
1474	70966	MED12	None	Progenitor Cells	None	2.16741e-06	6.78853e-07	4.18978e-07	6.94249e-07	3.25553e-06
1475	4514	RUNX1	None	Megakaryocyte	Cord blood	8.24975e-07	1.11685e-05	3.36017e-07	7.01306e-07	3.28639e-06
1476	38207	MYC	H54	Glial Cell	Brain	1.29695e-06	3.88357e-07	1.17166e-06	7.14374e-07	3.34536e-06
1477	63150	SRSF3	K562	Erythroblast	Bone Marrow	7.4013e-07	7.13838e-07	7.06583e-07	7.19898e-07	3.36895e-06
1478	45668	RELA	GM15510	Lymphoblastoid	Blood	2.03432e-06	1.79803e-06	3.22379e-07	7.22949e-07	3.38094e-06
1479	64375	TBX21	GM12878	B Lymphocyte	Blood	6.7201e-05	2.4941e-07	1.03287e-05	7.27949e-07	3.40202e-06
1480	49238	ETS1	DU145	Epithelium	Prostate	2.52802e-06	5.07152e-07	5.81711e-07	7.34137e-07	3.42862e-06
1481	70560	MYC	U2OS	None	Bone	9.0805e-07	7.09161e-07	6.91643e-07	7.5811e-07	3.53819e-06
1482	64290	ZBTB11	K562	Erythroblast	Bone Marrow	1.32872e-06	3.60869e-06	3.47333e-07	7.67501e-07	3.5796e-06
1483	1227	C17orf49	HeLa	Epithelium	Cervix	1.64794e-06	3.78724e-07	1.74477e-06	7.85257e-07	3.65994e-06
1484	72353	HDAC2	Kasumi-1	Acute myeloid leukemia	None	1.77697e-05	3.90157e-05	2.74529e-07	8.05476e-07	3.75165e-06
1485	9319	SMC1A	LCL	Lymphoblastoid	Blood	3.0522e-06	4.53039e-07	8.66471e-07	8.13217e-07	3.78515e-06
1486	76810	NEUROG2	None	Fibroblast	Fetal Lung	5.17392e-07	7.47346e-07	2.47391e-06	8.16313e-07	3.79701e-06
1487	72358	RUNX1	Kasumi-1	Acute myeloid leukemia	None	3.94776e-06	7.75975e-06	3.17325e-07	8.49011e-07	3.94645e-06
1488	44604	ERG	VCaP	Epithelium	Prostate	6.17515e-07	5.04213e-06	6.13175e-07	8.69924e-07	4.04094e-06
1489	45697	NRF1	H1	Embryonic Stem Cell	Embryo	9.62087e-07	1.09983e-06	6.75585e-07	8.74933e-07	4.06148e-06
1490	8122	MYC	NHEK	Keratinocyte	Skin	1.56345e-06	5.89539e-07	9.32337e-07	8.80171e-07	4.08305e-06
1491	55352	SUMO2	VCaP	Epithelium	Prostate	8.30334e-07	3.85961e-05	4.61459e-07	8.83058e-07	4.0937e-06
1492	1935	CREBBP	Jurkat E6-1	T Lymphocyte	Blood	1.56163e-06	5.65699e-07	1.042e-06	8.90797e-07	4.1268e-06
1493	64735	IKZF1	GM12878	B Lymphocyte	Blood	5.59997e-06	4.70466e-07	1.02234e-06	9.14e-07	4.23146e-06
1494	48999	AFF4	HeLa	Epithelium	Cervix	2.59179e-06	7.02315e-07	6.81695e-07	9.15576e-07	4.23592e-06
1495	45631	CTCF	GM12878	B Lymphocyte	Blood	6.5941e-06	2.89011e-05	3.28891e-07	9.29722e-07	4.29849e-06
1496	53330	CPSF3L	HeLa	Epithelium	Cervix	1.36467e-06	7.78781e-07	8.56552e-07	9.4212e-07	4.3529e-06
1497	55289	5MC	BicR	Epithelium	Prostate	0.0183586	3.19605e-07	0.0637118	9.58792e-07	4.42697e-06
1498	45726	ZNF263	HEK293T	Epithelium	Embryonic Kidney	5.53563e-07	0.00128721	7.58124e-07	9.596e-07	4.42774e-06
1499	67716	FOXA1	LNCaP	Epithelium	Prostate	2.7956e-06	4.06552e-07	3.69965e-06	9.71593e-07	4.48009e-06
1500	45693	CTBP2	H1	Embryonic Stem Cell	Embryo	5.57676e-07	2.09998e-05	8.23934e-07	9.82168e-07	4.52583e-06
1501	47579	TTF1	NCI-H441	Epithelium	Lung	1.2192e-06	1.4301e-05	4.69179e-07	9.92879e-07	4.57214e-06
1502	44435	TAL1	None	None	Cord blood	8.28484e-05	3.34252e-07	0.000455456	9.97998e-07	4.59265e-06
1503	7343	HNF4A	HepG2	Epithelium	Liver	1.35047e-06	5.70661e-05	4.48973e-07	1.00492e-06	4.62143e-06
1504	75286	ZBTB48	HeLa	None	None	8.24732e-07	9.16277e-07	1.73286e-06	1.04132e-06	4.78563e-06
1505	54104	DAXX	PC-3	Epithelium	Prostate	7.44104e-07	4.7795e-06	7.55121e-07	1.0426e-06	4.78835e-06
1506	74344	OTX2	D283 Med	None	None	4.30837e-07	9.10501e-06	2.52765e-06	1.06138e-06	4.87134e-06
1507	5043	CTCF	GM12891	Lymphoblastoid	Blood	3.4966e-06	0.000634597	3.96386e-07	1.06748e-06	4.8961e-06
1508	46346	FOSL2	SK-N-SH	Neuroblastoma cell	Brain	6.78623e-05	3.60494e-07	0.000100704	1.07195e-06	4.91335e-06
1509	9228	CBX3	HCT-116	None	Colon	6.32134e-06	4.28113e-07	3.98791e-06	1.09298e-06	5.00642e-06
1510	73533	CEBPB	SUM159PT	None	Breast	0.000235245	3.70197e-07	0.000619657	1.10818e-06	5.07269e-06
1511	48826	MBD2	MCF-7	Epithelium	Breast	1.15553e-06	8.15776e-07	1.63215e-06	1.1095e-06	5.07474e-06
1512	46300	SP1	K562	Erythroblast	Bone Marrow	1.38975e-06	3.23943e-06	5.97296e-07	1.1101e-06	5.07474e-06
1513	53549	SPI1	TSU-1621-MT	None	None	2.11722e-05	6.34141e-05	3.8834e-07	1.1372e-06	5.19519e-06
1514	42351	STAG1	GM12892	Lymphoblastoid	Blood	1.51657e-05	5.36465e-06	4.25796e-07	1.15345e-06	5.26597e-06
1515	56557	SMC1A	HuCCT1	None	None	6.36067e-05	0.00403054	3.89405e-07	1.16099e-06	5.29689e-06
1516	44563	EMX1	293FT	None	Embryonic Kidney	6.95877e-07	1.66789e-05	9.95707e-07	1.19937e-06	5.46839e-06
1517	32875	FAIRE	MCF7-LTED	Epithelium	Mammary Gland	1.332e-06	7.00684e-07	3.28086e-06	1.20835e-06	5.50567e-06
1518	44603	ERG	VCaP	Epithelium	Prostate	5.99591e-07	6.23643e-06	1.77054e-06	1.25368e-06	5.70846e-06
1519	56049	CREB1	HepG2	Epithelium	Liver	1.11985e-06	2.02329e-06	1.01842e-06	1.26629e-06	5.76206e-06
1520	46102	ZBTB7A	ECC-1	Epithelium	Endometrium	8.51826e-07	0.000341894	8.86833e-07	1.30181e-06	5.91982e-06
1521	54125	CEBPB	None	Mesenchymal Stem Cell	None	7.64583e-05	4.37139e-07	0.00072541	1.30318e-06	5.92215e-06
1522	8444	CEBPA	U937	None	Pleura	4.59401e-05	4.63252e-07	8.55173e-06	1.30585e-06	5.93038e-06
1523	45936	NFYB	K562	Erythroblast	Bone Marrow	3.4497e-06	4.17259e-06	5.67131e-07	1.30844e-06	5.93825e-06
1524	39359	SMAD3	LX2	Hepatic Stellate Cell	None	4.6898e-06	1.24685e-06	8.29116e-07	1.35053e-06	6.12523e-06
1525	55172	RUNX1	None	Myeloid Cell	None	6.56853e-06	0.000175379	4.88567e-07	1.3607e-06	6.16328e-06
1526	8481	RUNX1	None	Myeloblast	Blood	6.56853e-06	0.000175379	4.88567e-07	1.3607e-06	6.16328e-06
1527	45864	MAFK	IMR90	Fibroblast	Lung	0.000116269	4.63296e-07	0.00022193	1.3815e-06	6.25339e-06
1528	67585	MYC	None	Fibroblast	Foreskin	7.8804e-07	2.02714e-06	2.49631e-06	1.38705e-06	6.27439e-06
1529	65153	ZSCAN22	HEK293	Epithelium	Embryonic Kidney	8.87612e-07	9.19179e-06	1.08096e-06	1.38856e-06	6.27711e-06
1530	45701	CHD2	H1	Embryonic Stem Cell	Embryo	1.10982e-06	4.29658e-06	9.85526e-07	1.39634e-06	6.30816e-06
1531	67926	SPI1	None	Macrophage	Blood	7.74152e-05	0.000196907	4.71648e-07	1.40303e-06	6.33427e-06
1532	44092	ETS1	None	T Lymphocyte	Blood	3.12416e-06	2.80384e-06	6.90672e-07	1.41203e-06	6.37071e-06
1533	77098	ZNF534	293T	None	None	1.60452e-06	6.24688e-05	6.84112e-07	1.42789e-06	6.4381e-06
1534	46109	BATF	GM12878	B Lymphocyte	Blood	0.000155363	4.87788e-07	0.00017316	1.4547e-06	6.55468e-06
1535	39001	BRD4	MM1.S	B Lymphocyte	Blood	2.17516e-06	1.22364e-06	1.29198e-06	1.46272e-06	6.58652e-06
1536	47334	FOXA1	DU145	Epithelium	Prostate	0.000440607	4.89065e-07	0.000658394	1.46448e-06	6.59016e-06
1537	68777	BRD4	HCT-116	Colon cancer cell	Colon	1.4828e-06	1.59041e-06	1.34891e-06	1.46735e-06	6.59877e-06
1538	46066	TCF12	A549	Epithelium	Lung	5.53042e-06	5.55825e-06	5.98361e-07	1.47641e-06	6.63518e-06
1539	73720	CREBBP	None	B Lymphocyte	Tonsil	3.36173e-06	7.64952e-07	2.52389e-06	1.49929e-06	6.73364e-06
1540	70133	KDM2B	OCI-Ly1	B cell lymphoma	Bone Marrow	2.53743e-06	1.66431e-06	1.01898e-06	1.51797e-06	6.81312e-06
1541	46080	GABPA	A549	Epithelium	Lung	3.42083e-06	1.23657e-06	1.17835e-06	1.53873e-06	6.90182e-06
1542	38712	ETS2	LoVo	None	Colon	1.42919e-06	2.1102e-06	1.32821e-06	1.55725e-06	6.98035e-06
1543	42890	ZNF83	LoVo	None	Colon	2.11773e-06	2.22124e-06	1.01076e-06	1.56924e-06	7.02954e-06
1544	63823	ETS1	None	iPSC	None	2.9879e-06	1.00679e-06	1.7765e-06	1.5866e-06	7.10269e-06
1545	75139	RELA	Huh7	Epithelium	Liver	3.2054e-06	1.52268e-06	1.11722e-06	1.60962e-06	7.20111e-06
1546	67828	BRD4	None	None	None	6.62788e-06	4.16345e-06	6.8352e-07	1.61805e-06	7.23415e-06
1547	58334	MED1	LNCaP-abl	Epithelium	Prostate	1.77756e-06	1.29879e-06	1.94064e-06	1.62354e-06	7.254e-06
1548	33543	GATA1	None	Proerythroblast	Fetal Liver	2.65331e-05	6.00156e-07	1.3228e-05	1.68585e-06	7.52751e-06
1549	49008	ELL2	HeLa	Epithelium	Cervix	3.88725e-06	1.33798e-06	1.31877e-06	1.70171e-06	7.59002e-06
1550	74362	OTX2	D283 Med	None	None	1.65518e-06	1.05002e-06	4.85285e-06	1.70204e-06	7.59002e-06
1551	63478	POLR2H	K562	Erythroblast	Bone Marrow	1.16724e-06	3.48534e-06	1.65421e-06	1.71609e-06	7.64773e-06
1552	42800	STAT2	LoVo	None	Colon	4.75734e-06	1.5542e-06	1.12099e-06	1.71852e-06	7.65363e-06
1553	42503	STAG1	GM19240	Lymphoblastoid	Blood	6.94811e-06	2.69614e-05	6.41617e-07	1.72456e-06	7.67556e-06
1554	38586	E2F7	IMR90	Fibroblast	Lung	3.3769e-06	8.08973e-07	4.86356e-06	1.72625e-06	7.67813e-06
1555	46166	TCF12	H1	Embryonic Stem Cell	Embryo	8.80154e-07	0.000675205	1.72805e-06	1.74791e-06	7.7695e-06
1556	46217	ATF3	HCT-116	None	Colon	1.04266e-05	1.78954e-06	9.48159e-07	1.75502e-06	7.79606e-06
1557	76152	MYC	LNCaP	Epithelium	Prostate	3.22138e-06	1.20609e-06	1.79327e-06	1.76762e-06	7.84702e-06
1558	45945	NFYA	K562	Erythroblast	Bone Marrow	4.40071e-06	3.03889e-06	8.81717e-07	1.77467e-06	7.87325e-06
1559	46348	TEAD4	SK-N-SH	Neuroblastoma cell	Brain	6.85433e-06	6.93142e-07	3.54199e-05	1.85548e-06	8.22648e-06
1560	42213	STAT3	OCI-Ly19	B cell lymphoma	Bone Marrow	3.51265e-06	1.21669e-06	2.02841e-06	1.87549e-06	8.30985e-06
1561	71872	NIPBL	A549	Epithelium	Lung	1.95208e-06	2.12945e-06	1.6538e-06	1.8909e-06	8.37278e-06
1562	77255	DPF1	MCF-7	None	None	3.34731e-06	1.90561e-06	1.35658e-06	1.92226e-06	8.50618e-06
1563	68846	ESR1	T47D	Embryonic Stem Cell	Breast	3.78639e-06	1.44293e-06	1.69559e-06	1.93936e-06	8.57636e-06
1564	45922	ZNF384	K562	Erythroblast	Bone Marrow	4.12355e-05	7.00203e-07	1.13177e-05	1.94708e-06	8.60502e-06
1565	45636	ELK1	GM12878	B Lymphocyte	Blood	6.95549e-06	9.64664e-07	3.04728e-06	1.98865e-06	8.78309e-06
1566	63903	ZXDB	HEK293	Epithelium	Embryonic Kidney	1.26418e-06	1.35761e-05	1.58832e-06	2.00765e-06	8.86135e-06
1567	33895	MYC	None	Plasma Cell	None	8.08953e-06	1.63219e-06	1.39668e-06	2.06573e-06	9.11188e-06
1568	67518	GATA3	MDA-MB-231	Epithelium	Mammary Gland	0.00051046	6.96798e-07	0.00202133	2.08683e-06	9.19907e-06
1569	67686	ZBTB7A	None	Erythroblast	None	7.05391e-06	1.14812e-06	2.76704e-06	2.18316e-06	9.61761e-06
1570	62930	ZNF341	HEK293	Epithelium	Embryonic Kidney	1.02036e-06	2.22686e-05	2.97099e-06	2.20338e-06	9.7005e-06
1571	4631	KAT5	None	T Lymphocyte	Blood	3.31221e-06	1.4669e-06	2.67262e-06	2.20948e-06	9.72114e-06
1572	56359	BRD4	MOLM-14	Myeloid Cell	None	1.96862e-06	2.23615e-06	2.6478e-06	2.25084e-06	9.89529e-06
1573	43234	CHRM2	HeLa	Epithelium	Cervix	5.97941e-06	1.06938e-06	4.35092e-06	2.25192e-06	9.89529e-06
1574	39911	OGT	HEK293T	Epithelium	Embryonic Kidney	2.50623e-06	2.12135e-06	2.34651e-06	2.3138e-06	1.01607e-05
1575	38831	KLF5	LoVo	None	Colon	1.92441e-06	5.09654e-06	1.73093e-06	2.31916e-06	1.01778e-05
1576	45695	MXI1	H1	Embryonic Stem Cell	Embryo	3.86675e-06	2.92485e-06	1.44847e-06	2.32397e-06	1.01924e-05
1577	62799	KLF9	MCF-7	Epithelium	Breast	1.75123e-06	4.15106e-06	2.14552e-06	2.34739e-06	1.02886e-05
1578	1374	CEBPA	HepG2	Epithelium	Liver	3.77089e-05	8.06349e-07	0.000337692	2.36288e-06	1.03499e-05
1579	75042	TP53	MDA-MB-231	None	Breast	5.04179e-06	1.61654e-05	1.00415e-06	2.38841e-06	1.04552e-05
1580	51522	OTX2	HUES64	Embryonic Stem Cell	Embryo	9.22599e-07	0.00072976	5.92109e-06	2.39205e-06	1.04645e-05
1581	58333	MED1	LNCaP-abl	Epithelium	Prostate	3.77346e-06	1.60438e-06	3.10566e-06	2.47873e-06	1.08368e-05
1582	2395	STAG1	MCF-7	Epithelium	Breast	1.10406e-05	0.000572422	9.2457e-07	2.55557e-06	1.11657e-05
1583	45974	CTCF	None	Epithelium	Kidney	5.51817e-06	1.21758e-05	1.10219e-06	2.56272e-06	1.11898e-05
1584	46276	ATF3	K562	Erythroblast	Bone Marrow	5.04688e-06	2.21655e-06	2.0883e-06	2.65921e-06	1.16038e-05
1585	65108	OSR2	HEK293	Epithelium	Embryonic Kidney	2.43564e-05	9.46795e-07	3.63972e-05	2.66732e-06	1.16319e-05
1586	46129	EBF1	GM12878	B Lymphocyte	Blood	2.09274e-06	1.08925e-05	1.82938e-06	2.68749e-06	1.17124e-05
1587	42710	CREB1	LoVo	None	Colon	2.42422e-06	3.30598e-06	2.58102e-06	2.72126e-06	1.18521e-05
1588	41793	JARID2	None	iPSC	None	2.0674e-06	0.00341679	1.61965e-06	2.72378e-06	1.18557e-05
1589	51587	SP1	HUES64	Embryonic Stem Cell	Embryo	1.85889e-05	2.54293e-06	1.55162e-06	2.74843e-06	1.19554e-05
1590	65170	ZNF121	HEK293	Epithelium	Embryonic Kidney	1.91996e-05	1.04837e-06	1.99802e-05	2.84091e-06	1.23499e-05
1591	35087	BCOR	None	B Lymphocyte	None	5.77907e-06	2.30813e-06	2.23642e-06	2.84783e-06	1.23722e-05
1592	63663	BCL3	A549	Epithelium	Lung	3.81327e-06	2.60488e-06	2.48211e-06	2.85981e-06	1.24165e-05
1593	71680	CTCF	MCF-7	None	Breast	1.12497e-05	9.1693e-05	1.06975e-06	2.89969e-06	1.25817e-05
1594	64895	ZNF143	GM12878	B Lymphocyte	Blood	6.60009e-06	1.47562e-05	1.23419e-06	2.91396e-06	1.26357e-05
1595	45958	ZNF263	K562	Erythroblast	Bone Marrow	2.35498e-06	7.29137e-06	2.18028e-06	2.93991e-06	1.27402e-05
1596	45641	RELA	GM12878	B Lymphocyte	Blood	1.47412e-05	1.19392e-06	8.91924e-06	2.94832e-06	1.27687e-05
1597	50162	ARRB1	C4-2	Epithelium	None	3.02903e-06	4.74583e-06	2.12972e-06	2.96913e-06	1.28508e-05
1598	42331	STAG1	GM12891	Lymphoblastoid	Blood	5.40318e-05	1.96402e-05	1.09295e-06	3.0476e-06	1.31821e-05
1599	77120	ZNF441	293T	None	None	4.39874e-05	1.09521e-06	0.000132554	3.18017e-06	1.37469e-05
1600	76402	RELB	GM12878	Lymphoblastoid	None	1.46252e-05	1.20788e-06	2.25078e-05	3.18912e-06	1.3777e-05
1601	2401	TFAP2A	MCF-7	Epithelium	Breast	2.00361e-06	0.000691982	2.2913e-06	3.20178e-06	1.3823e-05
1602	64582	CBX1	HepG2	Epithelium	Liver	6.20765e-06	2.47657e-05	1.37176e-06	3.22422e-06	1.39112e-05
1603	56375	CDK8	MV4-11	Macrophage	Blood	4.55931e-06	3.29643e-06	2.52629e-06	3.2661e-06	1.40831e-05
1604	9212	GABPA	HeLa	Epithelium	Cervix	6.35099e-06	1.811e-06	4.93818e-06	3.28897e-06	1.41729e-05
1605	46253	REST	HepG2	Epithelium	Liver	4.36187e-06	1.16849e-05	1.72409e-06	3.3525e-06	1.44377e-05
1606	33610	FAIRE	None	Endothelial Cell	Umbilical Vein	1.85794e-05	1.4122e-06	7.93283e-06	3.37839e-06	1.45401e-05
1607	74354	OTX2	D-341	None	None	8.75538e-06	1.33527e-06	4.5874e-05	3.39012e-06	1.45802e-05
1608	48313	SPI1	GM12878	B Lymphocyte	Blood	0.000167389	1.1481e-06	0.000138332	3.39288e-06	1.45802e-05
1609	69365	FOXA1	LNCaP	Epithelium	Prostate	0.000133965	1.14362e-06	0.000494638	3.39403e-06	1.45802e-05
1610	34001	OGT	HEK293T	Epithelium	Embryonic Kidney	6.32083e-06	4.87578e-06	1.93164e-06	3.40523e-06	1.46192e-05
1611	39920	ICE1	HCT-116	None	Colon	2.2702e-05	1.23882e-05	1.32732e-06	3.41621e-06	1.46573e-05
1612	77059	ZNF695	293T	None	None	3.73273e-06	2.48061e-06	5.06722e-06	3.45473e-06	1.48133e-05
1613	37936	ETS1	None	Endothelial Cell	Umbilical Vein	4.03287e-06	4.73685e-06	2.51563e-06	3.50226e-06	1.50078e-05
1614	47078	TAL1	None	Erythroid Cell	None	1.38006e-05	1.34167e-06	4.88658e-05	3.57883e-06	1.53264e-05
1615	77448	H2AFX	IMR90	Fibroblast	Lung	4.4277e-06	2.56369e-06	4.99677e-06	3.67628e-06	1.5734e-05
1616	73986	CD34	None	None	Thymus	1.79115e-05	2.40892e-06	3.01085e-06	3.73559e-06	1.5978e-05
1617	68223	NR3C1	BEAS-2B	Epithelium	Lung	5.55534e-06	3.01491e-05	1.69882e-06	3.74149e-06	1.59918e-05
1618	5458	CEBPB	LS180	Epithelium	Colon	7.67133e-06	1.71001e-06	1.15937e-05	3.74345e-06	1.59918e-05
1619	63104	ATF1	HepG2	Epithelium	Liver	3.88004e-06	6.52105e-06	2.57529e-06	3.75289e-06	1.60222e-05
1620	72855	TRAF7	None	None	meningioma	1.36305e-05	3.81648e-06	2.17844e-06	3.77629e-06	1.61122e-05
1621	42770	JUNB	LoVo	None	Colon	9.56593e-06	2.9496e-06	3.11113e-06	3.9216e-06	1.67219e-05
1622	64144	NFRKB	K562	Erythroblast	Bone Marrow	3.10849e-06	4.62637e-06	4.49003e-06	3.94442e-06	1.68083e-05
1623	64649	ZNF639	K562	Erythroblast	Bone Marrow	9.13453e-06	3.07967e-05	1.61767e-06	3.94674e-06	1.68083e-05
1624	77256	ZXDC	MCF-7	None	None	4.96811e-06	4.64263e-06	2.95518e-06	3.97315e-06	1.69104e-05
1625	39495	FOXM1	MCF-7	Epithelium	Breast	4.81011e-06	6.30318e-06	2.58958e-06	3.98561e-06	1.69529e-05
1626	47287	FOSL1	BT-549	Epithelium	Mammary Gland	4.63772e-05	1.68701e-06	7.36561e-06	3.99951e-06	1.70016e-05
1627	77264	DPF1	K562	Erythroblast	Bone Marrow	4.1631e-06	3.68788e-06	4.27262e-06	4.02462e-06	1.70978e-05
1628	38773	NFAT5	LoVo	None	Colon	8.78954e-06	5.08489e-06	2.45043e-06	4.17523e-06	1.77268e-05
1629	63744	FOXK2	K562	Erythroblast	Bone Marrow	1.12063e-05	4.18365e-06	2.63647e-06	4.23995e-06	1.79905e-05
1630	64648	ZNF639	K562	Erythroblast	Bone Marrow	1.11253e-05	5.03142e-06	2.40476e-06	4.25847e-06	1.80383e-05
1631	68828	HEXIM1	A375	melanoma	None	1.64577e-05	4.17079e-06	2.4761e-06	4.25904e-06	1.80383e-05
1632	72604	HEXIM1	A375	Melanoma Cell	None	1.64577e-05	4.17079e-06	2.4761e-06	4.25904e-06	1.80383e-05
1633	67719	FOXA1	LNCaP	Epithelium	Prostate	3.10958e-05	1.55565e-06	0.000112984	4.38707e-06	1.85691e-05
1634	64291	ZBTB11	K562	Erythroblast	Bone Marrow	7.35148e-06	5.87651e-06	2.65919e-06	4.39721e-06	1.86007e-05
1635	534	ETV1	GIST48	Mesenchymal Stem Cell	Stomach	1.42445e-05	2.70591e-06	4.24798e-06	4.44332e-06	1.87753e-05
1636	63029	MBD2	K562	Erythroblast	Bone Marrow	6.97478e-06	2.85512e-06	5.51097e-06	4.44393e-06	1.87753e-05
1637	56478	KMT2D	None	B Lymphocyte	Tonsil	1.08446e-05	2.66227e-06	4.8709e-06	4.45677e-06	1.88181e-05
1638	47774	LDB1	None	Erythroid Progenitor Cell	Blood	0.000502941	1.49797e-06	0.000844625	4.47266e-06	1.88737e-05
1639	63477	POLR2H	K562	Erythroblast	Bone Marrow	4.24095e-06	5.72038e-06	3.89261e-06	4.49433e-06	1.89535e-05
1640	2402	TFAP2A	MCF-7	Epithelium	Breast	3.41675e-06	0.000856871	2.78032e-06	4.59057e-06	1.93476e-05
1641	63690	GLIS1	HEK293	Epithelium	Embryonic Kidney	6.08762e-06	0.000187795	2.08751e-06	4.62512e-06	1.94813e-05
1642	64269	H2AFZ	MM.1S	B Lymphoblast	Blood	1.567e-05	2.77992e-06	4.83186e-06	4.75814e-06	2.00294e-05
1643	72856	TRAF7	None	None	meningioma	1.17755e-05	1.24422e-05	2.17326e-06	4.79668e-06	2.01793e-05
1644	48061	BRD4	None	Endothelial Cell	Umbilical Vein	2.18261e-05	2.14603e-06	9.21444e-06	4.83622e-06	2.03333e-05
1645	64184	BCL3	A549	Epithelium	Lung	5.93902e-06	4.05017e-06	5.26345e-06	4.95646e-06	2.08262e-05
1646	64376	TBX21	GM12878	B Lymphocyte	Blood	0.000138152	1.70333e-06	0.000197154	5.00504e-06	2.10175e-05
1647	68974	ESR1	T47D	None	Breast	5.38933e-06	8.81377e-06	3.431e-06	5.08069e-06	2.13222e-05
1648	70108	FOXA1	LNCaP	Epithelium	Prostate	0.000199724	1.74755e-06	0.00018113	5.14795e-06	2.15914e-05
1649	48634	SPIB	H929	B Lymphocyte	Bone Marrow	5.22868e-06	5.49425e-05	2.70427e-06	5.17921e-06	2.17093e-05
1650	8447	SMAD1	U937	None	Pleura	5.58118e-05	3.68083e-05	1.87633e-06	5.18996e-06	2.17412e-05
1651	55345	SUMO2	K562	Erythroblast	Bone Marrow	7.34681e-06	4.05651e-06	5.18083e-06	5.2115e-06	2.18182e-05
1652	49860	GABPA	SK-N-MC	None	Brain	1.78668e-05	3.01134e-06	5.67868e-06	5.31778e-06	2.22497e-05
1653	45813	NRF1	HepG2	Epithelium	Liver	1.5032e-05	3.61313e-06	4.61115e-06	5.35562e-06	2.23945e-05
1654	35475	NKX2-1	NCI-H2087	None	Lung	4.71586e-06	3.89257e-06	1.11698e-05	5.37175e-06	2.24483e-05
1655	73999	ESR1	None	None	endometrioid adenocarcinoma	3.0041e-05	2.38379e-06	9.60437e-06	5.38689e-06	2.2498e-05
1656	58018	CHD1	LNCaP	Epithelium	Prostate	5.65392e-06	5.20898e-06	5.86876e-06	5.56341e-06	2.32212e-05
1657	74680	FOXO3	K562	Erythroblast	Bone Marrow	5.01776e-06	4.65445e-06	8.58951e-06	5.65439e-06	2.35867e-05
1658	55353	SUMO2	VCaP	Epithelium	Prostate	1.02209e-05	7.6188e-05	2.40802e-06	5.70078e-06	2.37659e-05
1659	67808	BRD4	None	None	None	1.53103e-05	3.60989e-06	5.48924e-06	5.71966e-06	2.38302e-05
1660	73462	MLLT3	THP-1	AML cell line	None	8.62866e-06	3.57291e-06	8.34538e-06	5.81843e-06	2.42271e-05
1661	46069	REST	A549	Epithelium	Lung	9.17699e-06	1.59985e-05	2.92203e-06	5.83997e-06	2.43021e-05
1662	76816	NEUROG2	None	Fibroblast	Fetal Lung	3.49826e-05	2.11625e-06	8.88027e-05	5.85503e-06	2.43502e-05
1663	63321	ELK1	K562	Erythroblast	Bone Marrow	2.16394e-05	4.53501e-06	4.29475e-06	6.00527e-06	2.496e-05
1664	46189	TEAD4	H1	Embryonic Stem Cell	Embryo	6.36044e-06	0.00048928	3.10719e-06	6.23571e-06	2.59022e-05
1665	46206	CEBPB	HCT-116	None	Colon	9.24023e-06	3.35544e-05	2.99046e-06	6.35026e-06	2.63621e-05
1666	67516	GATA3	MDA-MB-231	Epithelium	Mammary Gland	0.00074354	2.1713e-06	0.00087331	6.47887e-06	2.68799e-05
1667	59344	EBF1	MutuI	B Lymphocyte	None	8.61482e-06	3.56369e-06	1.53989e-05	6.49876e-06	2.69463e-05
1668	42220	STAT3	U-2932	B Lymphocyte	None	3.00355e-05	2.913e-06	1.26653e-05	6.58561e-06	2.729e-05
1669	48319	ZBTB33	GM12878	B Lymphocyte	Blood	7.18172e-06	5.65477e-06	7.3608e-06	6.63806e-06	2.74909e-05
1670	55812	BRD4	TC-797	None	None	4.49281e-06	8.6646e-06	9.28493e-06	6.73112e-06	2.78596e-05
1671	39572	BCL6	OCI-Ly7	B cell lymphoma	Blood	8.64537e-06	5.30996e-06	7.566e-06	6.87814e-06	2.8451e-05
1672	64786	ZNF687	MCF-7	Epithelium	Breast	7.5564e-06	1.66846e-05	4.13984e-06	6.91517e-06	2.85871e-05
1673	51603	TAL1	HUES64	Embryonic Stem Cell	Embryo	6.5552e-06	7.592e-06	6.93991e-06	7.00341e-06	2.89346e-05
1674	63974	GATA4	HepG2	Epithelium	Liver	4.04287e-06	1.3137e-05	9.73048e-06	7.03829e-06	2.90613e-05
1675	54573	HSF1	U2OS	None	Bone	1.35983e-05	8.89996e-06	4.17161e-06	7.04864e-06	2.90867e-05
1676	42293	STAG1	GM12878	B Lymphocyte	Blood	3.5827e-05	6.32835e-05	2.65443e-06	7.13534e-06	2.94269e-05
1677	68968	PR	T47D	None	Breast	1.26446e-05	9.44603e-06	4.36953e-06	7.24975e-06	2.98809e-05
1678	58019	CHD1	LNCaP	Epithelium	Prostate	7.84656e-06	7.3424e-06	6.8744e-06	7.33305e-06	3.02062e-05
1679	34563	EGR2	None	Macrophage	None	7.05289e-06	7.30998e-06	7.72244e-06	7.35154e-06	3.02644e-05
1680	42941	NIPBL	GP5d	None	Colon	1.66507e-05	5.34598e-06	6.47359e-06	7.47034e-06	3.07351e-05
1681	34074	CDK8	None	Epithelium	Colon	2.48553e-05	9.3979e-06	4.0392e-06	7.61009e-06	3.12915e-05
1682	73408	RBPJ	None	Neurosphere	None	1.10075e-05	5.54627e-06	8.37847e-06	7.68241e-06	3.157e-05
1683	55290	5HMC	BicR	Epithelium	Prostate	4.93884e-05	2.74295e-06	0.000657831	7.76522e-06	3.18914e-05
1684	72628	ETS1	None	Endothelial Cell	Umbilical Vein	1.22256e-05	4.07395e-06	1.75169e-05	7.80549e-06	3.20377e-05
1685	8769	CHD1	K562	Erythroblast	Bone Marrow	7.80461e-06	8.43718e-06	7.45211e-06	7.87727e-06	3.23132e-05
1686	42518	STAG1	GM2255	Lymphoblastoid	Blood	5.9846e-05	9.73365e-06	3.95982e-06	8.0649e-06	3.30632e-05
1687	67750	FOXA1	LNCaP	Epithelium	Prostate	3.9588e-05	3.15647e-06	4.93641e-05	8.2798e-06	3.39241e-05
1688	74341	NEUROD1	D283 Med	None	None	2.71595e-05	3.54421e-06	2.59889e-05	8.39283e-06	3.43668e-05
1689	39779	REPIN1	Kasumi-1	Myeloblast	Blood	0.00257799	2.85007e-06	0.000258309	8.44768e-06	3.4567e-05
1690	39560	MYC	BJ	Fibroblast	Skin	2.95865e-05	4.65581e-06	9.4009e-06	8.45171e-06	3.4567e-05
1691	44097	RUNX1	None	T Lymphocyte	Blood	7.13075e-06	1.13366e-05	8.13214e-06	8.53689e-06	3.48947e-05
1692	67537	BRD4	COLO 205	None	None	9.35147e-06	7.93367e-06	9.0431e-06	8.73206e-06	3.56714e-05
1693	64143	NFRKB	K562	Erythroblast	Bone Marrow	1.57208e-05	5.80017e-06	9.83944e-06	8.88492e-06	3.62744e-05
1694	46021	YY1	NT2-D1	None	Embryo	8.97377e-06	6.93604e-06	1.27645e-05	8.98331e-06	3.66544e-05
1695	45804	USF2	HepG2	Epithelium	Liver	1.01469e-05	8.70791e-06	8.34591e-06	9.00334e-06	3.67145e-05
1696	77449	NFKB2	L1236	Hodgkin Lymphoma Cell	None	9.90418e-06	1.50514e-05	6.10888e-06	9.06064e-06	3.69264e-05
1697	76818	NEUROG2	None	Fibroblast	Fetal Lung	3.14217e-05	3.45671e-06	0.000125701	9.11653e-06	3.71323e-05
1698	56115	AR	None	None	Prostate	7.81014e-06	6.78627e-06	1.97428e-05	9.20114e-06	3.74548e-05
1699	36032	SPI1	None	Epithelium	Cervix	1.2636e-05	6.73258e-06	1.02023e-05	9.21127e-06	3.7474e-05
1700	62485	YY1	None	None	Liver	4.53628e-05	1.48034e-05	4.2941e-06	9.30307e-06	3.78252e-05
1701	77298	TRIM25	None	None	Breast	6.50573e-06	1.29691e-05	1.0992e-05	9.32278e-06	3.7883e-05
1702	63156	GABP	HepG2	Epithelium	Liver	1.07094e-05	7.78216e-06	1.01877e-05	9.37405e-06	3.8069e-05
1703	2396	STAG1	MCF-7	Epithelium	Breast	2.03244e-05	4.07189e-05	4.12996e-06	9.49687e-06	3.85451e-05
1704	566	VDR	GM10861	Lymphocyte	Blood	2.41007e-05	5.11103e-06	1.32111e-05	9.58951e-06	3.88942e-05
1705	57640	IKZF1	Nalm6	B cell precursor	Blood	1.11539e-05	5.74059e-06	2.04756e-05	9.59412e-06	3.88942e-05
1706	2394	STAG1	MCF-7	Epithelium	Breast	2.34379e-05	0.000346447	3.80165e-06	9.72144e-06	3.93872e-05
1707	74686	KLF10	HepG2	Epithelium	Liver	7.3481e-06	2.4024e-05	7.72026e-06	9.76423e-06	3.95374e-05
1708	46128	IRF4	GM12878	B Lymphocyte	Blood	0.000423102	3.43811e-06	0.000260879	1.00992e-05	4.08696e-05
1709	46224	ZBTB7A	HepG2	Epithelium	Liver	7.29994e-06	0.00022295	6.43733e-06	1.01073e-05	4.08785e-05
1710	33164	MED1	P493-6	B cell lymphoma	None	1.70962e-05	9.09347e-06	7.81022e-06	1.01181e-05	4.08983e-05
1711	76686	CCND2	MM1.S	B Lymphocyte	Blood	1.60622e-05	6.08641e-06	1.4386e-05	1.01327e-05	4.09335e-05
1712	55576	PAX5	None	B Lymphocyte	None	2.12686e-05	4.37078e-06	5.4253e-05	1.01957e-05	4.11639e-05
1713	67798	BRD4	SUM149	None	None	9.09815e-06	1.2042e-05	1.04819e-05	1.04038e-05	4.19794e-05
1714	53592	MED1	None	Adipocyte	None	4.88346e-05	4.17372e-06	3.66913e-05	1.04411e-05	4.21055e-05
1715	32890	FOXM1	U2OS	None	Bone	8.35244e-06	1.14265e-05	1.2961e-05	1.05487e-05	4.25145e-05
1716	33707	SOX2	BJ	Fibroblast	Skin	0.000299947	3.5996e-06	0.00133894	1.06425e-05	4.28638e-05
1717	1375	CEBPA	HepG2	Epithelium	Liver	0.000488142	3.57991e-06	0.00274346	1.06477e-05	4.28638e-05
1718	63241	FOXK2	K562	Erythroblast	Bone Marrow	5.106e-05	4.54448e-06	2.79623e-05	1.08935e-05	4.38275e-05
1719	67496	SMARCA4	MDA-MB-231	Epithelium	Mammary Gland	4.34585e-06	7.39517e-05	3.71715e-05	1.10894e-05	4.45898e-05
1720	55668	PAF1	HCT-116	None	Colon	2.3397e-05	1.46875e-05	6.58022e-06	1.14157e-05	4.58689e-05
1721	42747	SOX9	LoVo	None	Colon	2.20446e-05	1.10093e-05	7.90609e-06	1.14208e-05	4.58689e-05
1722	75840	MYCN	Rh4	rhabdomyosarcoma	None	1.08076e-05	1.00658e-05	1.44254e-05	1.14856e-05	4.61026e-05
1723	46172	REST	H1	Embryonic Stem Cell	Embryo	8.54236e-06	0.000488969	7.11993e-06	1.1558e-05	4.63663e-05
1724	63301	NKRF	K562	Erythroblast	Bone Marrow	1.05291e-05	1.22644e-05	1.26844e-05	1.17487e-05	4.71037e-05
1725	48280	CEBPA	GM12878	B Lymphocyte	Blood	3.64629e-05	6.79221e-06	1.24727e-05	1.17726e-05	4.71601e-05
1726	7488	JUND	K562	Erythroblast	Bone Marrow	0.0002119	0.00120706	4.01285e-06	1.17764e-05	4.71601e-05
1727	38299	MYC	H128	Epithelium	Lung	1.82356e-05	9.38136e-06	1.11501e-05	1.19466e-05	4.78142e-05
1728	47275	KDM5B	SUM185PE	Epithelium	Mammary Gland	1.00671e-05	1.14792e-05	1.61096e-05	1.20714e-05	4.82629e-05
1729	71015	MYC	None	Hematopoietic stem and progenitor cell	Bone Marrow	2.42857e-05	1.02503e-05	9.11079e-06	1.20727e-05	4.82629e-05
1730	55682	PAF1	MCF-7	Epithelium	Breast	1.2549e-05	9.75507e-06	1.55672e-05	1.21735e-05	4.86379e-05
1731	54657	TLX1	ALL-SIL	T Lymphocyte	Blood	9.35055e-05	4.28942e-06	0.000629896	1.22243e-05	4.88123e-05
1732	44584	BRD4	VCaP	Epithelium	Prostate	3.6914e-05	8.61693e-06	1.0183e-05	1.24304e-05	4.96067e-05
1733	53469	KDM1A	SH-SY5Y	None	Bone Marrow	3.32928e-05	7.0762e-06	1.53493e-05	1.26847e-05	5.05665e-05
1734	62979	CTCF	None	None	gastroesophageal sphincter	0.000268473	4.54188e-06	7.94143e-05	1.26855e-05	5.05665e-05
1735	71016	MYC	None	Hematopoietic stem and progenitor cell	Bone Marrow	2.17211e-05	9.33545e-06	1.23112e-05	1.27995e-05	5.09916e-05
1736	51056	FOXA1	VCaP	Epithelium	Prostate	4.98497e-06	0.000140127	4.26442e-05	1.29764e-05	5.16663e-05
1737	69802	NR1H3	HT29	colorectal adenocarcinoma	None	3.78175e-05	0.000998711	5.00879e-06	1.32105e-05	5.2568e-05
1738	35524	BCL6	OCI-Ly1	B cell lymphoma	Bone Marrow	8.25158e-05	4.98062e-06	8.98389e-05	1.33912e-05	5.32565e-05
1739	54126	CEBPB	None	Mesenchymal Stem Cell	None	0.00015136	4.63034e-06	0.00155311	1.34398e-05	5.34192e-05
1740	9205	HCFC1	HeLa	Epithelium	Cervix	2.83067e-05	8.28657e-06	1.50216e-05	1.34786e-05	5.35424e-05
1741	63537	ZNF692	HEK293	Epithelium	Embryonic Kidney	1.66064e-05	4.57859e-05	7.26e-06	1.36488e-05	5.41875e-05
1742	46068	ETS1	A549	Epithelium	Lung	1.77122e-05	1.24264e-05	1.22449e-05	1.37238e-05	5.4454e-05
1743	49000	AFF4	HeLa	Epithelium	Cervix	3.158e-05	1.16739e-05	9.91147e-06	1.37476e-05	5.45172e-05
1744	63433	ELK1	MCF-7	Epithelium	Breast	1.91186e-05	1.20111e-05	1.24824e-05	1.39099e-05	5.5129e-05
1745	48633	SPI1	H929	B Lymphocyte	Bone Marrow	3.45476e-05	2.91614e-05	6.67541e-06	1.40818e-05	5.57784e-05
1746	41307	ZFX	NOMO-1	Myeloid Cell	None	1.31152e-05	1.50527e-05	1.44808e-05	1.41685e-05	5.60896e-05
1747	53417	RUNX1	Kasumi-1	Myeloblast	Blood	6.36944e-05	3.13435e-05	6.22976e-06	1.44145e-05	5.70308e-05
1748	50108	CHRM2	U937	None	Pleura	1.32654e-05	1.49828e-05	1.52843e-05	1.44541e-05	5.71548e-05
1749	75136	MYB	DU-528	None	Blood	1.5386e-05	2.4262e-05	9.95512e-06	1.45165e-05	5.73688e-05
1750	50981	TET2	HCT-116	None	Colon	4.95328e-05	8.55415e-06	1.47143e-05	1.46304e-05	5.77689e-05
1751	38194	CTCF	MCF-7	Epithelium	Breast	2.88994e-05	0.0273369	5.87005e-06	1.46345e-05	5.77689e-05
1752	56555	MED1	HuCCT1	None	None	1.85101e-05	1.62476e-05	1.14313e-05	1.47746e-05	5.82888e-05
1753	42568	CTCF	MS1	Lymphoblastoid	Blood	5.44961e-05	0.00014726	5.75293e-06	1.5078e-05	5.94519e-05
1754	62636	KLF9	HEK293	Epithelium	Embryonic Kidney	3.1262e-05	0.000210094	6.18104e-06	1.51109e-05	5.95475e-05
1755	2403	TFAP2C	MCF-7	Epithelium	Breast	1.67668e-05	0.0102087	7.23073e-06	1.51486e-05	5.96282e-05
1756	9507	TFAP2C	MCF-7	Epithelium	Breast	1.67668e-05	0.0102087	7.23073e-06	1.51486e-05	5.96282e-05
1757	49543	BRD2	H9	Embryonic Stem Cell	Embryo	1.43305e-05	1.59206e-05	1.56508e-05	1.52681e-05	6.00645e-05
1758	55348	SUMO2	K562	Erythroblast	Bone Marrow	3.46686e-05	1.15968e-05	1.30736e-05	1.56604e-05	6.15728e-05
1759	76186	MYC	HCT-116	Colon cancer cell	Colon	1.4209e-05	1.61268e-05	1.71687e-05	1.57372e-05	6.18393e-05
1760	36349	PTPN11	A549	Epithelium	Lung	1.52476e-05	1.5584e-05	1.67435e-05	1.5833e-05	6.21806e-05
1761	57111	EPO	RL95-2	None	Uterus	1.58222e-05	1.60326e-05	1.62621e-05	1.6037e-05	6.29458e-05
1762	49739	LMO2	Kasumi-1	Myeloblast	Blood	3.61187e-05	9.30243e-06	1.93821e-05	1.60618e-05	6.30073e-05
1763	76295	YY1	LCL	Lymphoblastoid	Blood	2.19199e-05	1.26156e-05	1.64741e-05	1.61648e-05	6.33754e-05
1764	73503	BRD4	SUM229	mammary carcinoma cell line	Breast	1.76129e-05	0.000163347	8.21464e-06	1.62485e-05	6.36676e-05
1765	53598	RELA	None	Adipocyte	None	4.79708e-05	6.5231e-06	0.000145647	1.65734e-05	6.49037e-05
1766	50020	SCML2	K562	Erythroblast	Bone Marrow	2.53521e-05	1.22393e-05	1.68091e-05	1.66076e-05	6.5001e-05
1767	73547	BRD4	SUM159PT	mammary carcinoma cell line	Breast	4.64416e-05	1.43597e-05	1.13432e-05	1.67289e-05	6.54385e-05
1768	65122	ZFP64	HEK293	Epithelium	Embryonic Kidney	8.16044e-06	8.35259e-05	2.39305e-05	1.70162e-05	6.65249e-05
1769	77150	ZNF273	293T	None	None	3.10876e-05	2.30955e-05	1.00842e-05	1.71791e-05	6.71237e-05
1770	63757	ZBTB33	None	None	Liver	1.25954e-05	3.66807e-05	1.52032e-05	1.73982e-05	6.79413e-05
1771	58875	RUNX1	TF-1	Erythroblast	Bone Marrow	1.98252e-05	1.67028e-05	1.8588e-05	1.82805e-05	7.13237e-05
1772	65072	KLF15	HEK293	Epithelium	Embryonic Kidney	1.02475e-05	8.20474e-05	1.84311e-05	1.82895e-05	7.13237e-05
1773	65151	SP1	HEK293	Epithelium	Embryonic Kidney	1.26901e-05	0.00384523	1.17765e-05	1.82953e-05	7.13237e-05
1774	76405	RELA	GM12878	Lymphoblastoid	None	2.24743e-05	1.38973e-05	2.14781e-05	1.84037e-05	7.17059e-05
1775	46121	PBX3	GM12878	B Lymphocyte	Blood	2.19801e-05	6.39483e-05	9.93035e-06	1.85374e-05	7.21863e-05
1776	70162	TEAD4	BE2-C	Neuroblastoma cell	Bone Marrow	0.000170639	6.58377e-06	0.000519371	1.87882e-05	7.31218e-05
1777	46133	ATF3	GM12878	B Lymphocyte	Blood	2.48361e-05	1.27723e-05	2.45654e-05	1.88364e-05	7.32679e-05
1778	63972	RUNX1	K562	Erythroblast	Bone Marrow	3.33057e-05	1.07925e-05	2.74874e-05	1.88606e-05	7.33207e-05
1779	5048	CTCF	GM19238	Lymphoblastoid	Blood	9.2744e-05	0.00172464	6.78234e-06	1.88912e-05	7.33986e-05
1780	34472	PAX5	L428-PAX5	B Lymphocyte	None	0.000141758	6.95527e-06	0.000248352	1.93728e-05	7.52272e-05
1781	46198	REST	H1	Embryonic Stem Cell	Embryo	3.10549e-05	0.000309583	8.7567e-06	2.00495e-05	7.78116e-05
1782	38864	RXRA	LoVo	None	Colon	1.39771e-05	2.53752e-05	2.67487e-05	2.02239e-05	7.84442e-05
1783	57091	LARP7	HCT-116	None	Colon	1.29049e-05	0.00630244	1.47958e-05	2.06561e-05	8.00757e-05
1784	46319	EGR1	MCF-7	Epithelium	Breast	4.68765e-05	1.74228e-05	1.55194e-05	2.0955e-05	8.11887e-05
1785	46107	TEAD4	ECC-1	Epithelium	Endometrium	5.06777e-05	0.000100971	8.92186e-06	2.11684e-05	8.19697e-05
1786	52774	BCL6	None	T Lymphocyte	Tonsil	3.90442e-05	1.66216e-05	1.82485e-05	2.13411e-05	8.25923e-05
1787	8409	GATA1	None	Proerythroblast	Blood	0.000318446	7.44697e-06	0.000425084	2.1463e-05	8.30174e-05
1788	58636	MED1	LNCaP-abl	Epithelium	Prostate	2.73708e-05	1.76522e-05	2.17966e-05	2.15728e-05	8.33488e-05
1789	55344	SUMO2	K562	Erythroblast	Bone Marrow	2.24128e-05	1.6052e-05	3.11048e-05	2.15728e-05	8.33488e-05
1790	42566	STAG1	GM2630	Lymphoblastoid	Blood	9.25981e-05	4.00684e-05	9.70046e-06	2.16069e-05	8.33947e-05
1791	63176	ETV1	K562	Erythroblast	Bone Marrow	4.75546e-05	1.82955e-05	1.58364e-05	2.16088e-05	8.33947e-05
1792	72627	ETS1	None	Endothelial Cell	Umbilical Vein	4.30383e-05	1.19427e-05	3.26129e-05	2.17974e-05	8.40758e-05
1793	71319	RAD21	HCT-116	Colon cancer cell	Colon	3.75707e-05	0.00318266	9.05017e-06	2.18299e-05	8.41543e-05
1794	45892	JUN	K562	Erythroblast	Bone Marrow	5.65957e-05	9.32772e-05	9.24458e-06	2.19681e-05	8.46398e-05
1795	63055	RAD21	None	None	Liver	4.6792e-05	0.00421153	9.00178e-06	2.26078e-05	8.70556e-05
1796	77133	ZNF343	293T	None	None	2.09158e-05	3.30746e-05	1.83826e-05	2.26509e-05	8.71733e-05
1797	68977	PR	T47D	None	Breast	3.38918e-05	4.52377e-05	1.24405e-05	2.27284e-05	8.73977e-05
1798	46294	CEBPD	K562	Erythroblast	Bone Marrow	3.47859e-05	3.23045e-05	1.38399e-05	2.27345e-05	8.73977e-05
1799	64298	NFE2L2	HeLa-S3	Epithelium	Cervix	0.00011036	9.55146e-06	6.62239e-05	2.32815e-05	8.94508e-05
1800	45786	ZKSCAN1	HeLa-S3	Epithelium	Cervix	0.000167646	8.4161e-06	0.000257644	2.33162e-05	8.9534e-05
1801	38650	NFYA	LoVo	None	Colon	4.26025e-05	2.14552e-05	1.76743e-05	2.36853e-05	9.0901e-05
1802	7322	FOXA1	HepG2	Epithelium	Liver	1.47072e-05	0.00136888	1.7302e-05	2.37114e-05	9.09507e-05
1803	67499	GATA3	MDA-MB-231	Epithelium	Mammary Gland	4.41876e-05	1.02255e-05	0.000173184	2.37719e-05	9.11323e-05
1804	53262	FOXM1	HEK293	Epithelium	Embryonic Kidney	3.8454e-05	1.57377e-05	2.88248e-05	2.4147e-05	9.25187e-05
1805	44600	BRD4	VCaP	Epithelium	Prostate	2.45537e-05	0.000188313	1.28523e-05	2.42239e-05	9.27621e-05
1806	76814	NEUROG2	None	Fibroblast	Fetal Lung	3.18907e-05	1.24956e-05	8.46645e-05	2.43513e-05	9.31984e-05
1807	46259	SPI1	HL-60	Promyeloblast	Blood	0.000600462	0.000461599	8.39177e-06	2.4391e-05	9.32986e-05
1808	68975	PR	T47D	None	Breast	2.5249e-05	6.28702e-05	1.49177e-05	2.44806e-05	9.35896e-05
1809	65133	PRDM1	HEK293	Epithelium	Embryonic Kidney	2.27726e-05	1.74561e-05	5.01223e-05	2.47626e-05	9.46154e-05
1810	64857	RAD21	None	None	Liver	7.03106e-05	0.000228722	9.81507e-06	2.49006e-05	9.50901e-05
1811	64614	CTCF	None	None	Colon	0.000209347	9.77413e-06	9.9497e-05	2.56108e-05	9.7748e-05
1812	32784	ATF3	None	Glioblastoma Multiforme Stem Like	None	0.000409984	9.0635e-06	0.000264719	2.57402e-05	9.81877e-05
1813	39443	FOXM1	MCF-7	Epithelium	Breast	3.78653e-05	1.96835e-05	2.68715e-05	2.62175e-05	9.99533e-05
1814	33678	TBX21	None	Th1	None	2.37319e-05	1.82142e-05	5.95167e-05	2.63524e-05	0.000100412
1815	54105	DAXX	PC-3	Epithelium	Prostate	2.31211e-05	2.25432e-05	3.83339e-05	2.63861e-05	0.000100485
1816	63729	H2AFZ	KMS11	None	None	3.1893e-05	1.98644e-05	3.15263e-05	2.64514e-05	0.000100678
1817	8819	RBBP5	H1	Embryonic Stem Cell	Embryo	1.75433e-05	0.000179553	2.002e-05	2.66616e-05	0.000101423
1818	45232	RBBP5	H1	Embryonic Stem Cell	Embryo	1.6206e-05	0.000136764	2.30221e-05	2.66776e-05	0.000101428
1819	40379	CTCF	BCBL1	B cell lymphoma	None	0.000283841	9.65965e-06	0.000496776	2.75079e-05	0.000104527
1820	63322	ELK1	K562	Erythroblast	Bone Marrow	4.28323e-05	2.45035e-05	2.48319e-05	2.87279e-05	0.000109103
1821	45656	EBF1	GM12878	B Lymphocyte	Blood	3.13439e-05	2.7056e-05	2.83328e-05	2.88021e-05	0.000109325
1822	64770	SRSF3	HepG2	Epithelium	Liver	2.4307e-05	3.21667e-05	3.16323e-05	2.88901e-05	0.000109598
1823	63743	FOXK2	K562	Erythroblast	Bone Marrow	0.000109285	1.61335e-05	3.12574e-05	2.90907e-05	0.000110299
1824	39767	PR	T47D	Epithelium	Mammary Gland	1.4736e-05	0.000193842	3.36244e-05	2.91941e-05	0.00011063
1825	67519	GATA3	MDA-MB-231	Epithelium	Mammary Gland	0.00144409	1.0185e-05	0.00759999	3.03006e-05	0.000114761
1826	63756	ZBTB33	None	None	Liver	3.40485e-05	6.07447e-05	1.95503e-05	3.09335e-05	0.000117093
1827	56042	GABPA	HepG2	Epithelium	Liver	6.63412e-05	1.92151e-05	3.37166e-05	3.09997e-05	0.00011728
1828	67503	GATA3	MDA-MB-231	Epithelium	Mammary Gland	0.000736642	1.05144e-05	0.00639448	3.10491e-05	0.000117402
1829	49003	ELL2	HeLa	Epithelium	Cervix	0.000121894	1.66798e-05	3.53319e-05	3.11011e-05	0.000117535
1830	42505	CTCF	GM2255	Lymphoblastoid	Blood	9.2733e-05	0.00105957	1.18215e-05	3.11465e-05	0.000117611
1831	63524	ZFP2	HEK293	Epithelium	Embryonic Kidney	1.63661e-05	0.000420118	3.04787e-05	3.11553e-05	0.000117611
1832	50434	ELK3	None	Endothelial Cell	Umbilical Vein	8.19734e-05	1.84336e-05	3.36613e-05	3.11995e-05	0.000117713
1833	56481	KMT2D	None	B Lymphocyte	Tonsil	3.90941e-05	2.64239e-05	3.08123e-05	3.12896e-05	0.000117989
1834	45562	CTCF	AG04449	Fibroblast	Skin	7.17226e-05	0.000199065	1.30771e-05	3.14348e-05	0.000118472
1835	74139	FOXA1	T47D	None	Breast	4.53513e-05	1.62163e-05	9.29671e-05	3.17552e-05	0.000119614
1836	46330	REST	PANC-1	None	Pancreas	5.93164e-05	5.79337e-05	1.67409e-05	3.19646e-05	0.000120337
1837	36031	FAIRE	None	Epithelium	Cervix	3.77452e-05	2.49319e-05	3.71415e-05	3.20764e-05	0.000120692
1838	45386	SETDB1	K562	Erythroblast	Bone Marrow	4.41809e-05	2.32087e-05	3.88058e-05	3.27902e-05	0.000123244
1839	8772	SETDB1	K562	Erythroblast	Bone Marrow	4.41809e-05	2.32087e-05	3.88058e-05	3.27902e-05	0.000123244
1840	57670	PCGF1	K562	Erythroblast	Bone Marrow	3.30728e-05	3.40912e-05	3.16664e-05	3.29133e-05	0.00012364
1841	39914	ICE1	HCT-116	None	Colon	6.9351e-05	2.32569e-05	3.04101e-05	3.32221e-05	0.000124732
1842	8460	CEBPA	U937	None	Pleura	3.3809e-05	3.26078e-05	3.3331e-05	3.32419e-05	0.000124738
1843	48448	BRD4	MCF-7	Epithelium	Breast	6.09291e-05	3.36998e-05	2.32094e-05	3.36427e-05	0.000126174
1844	46112	ATF2	GM12878	B Lymphocyte	Blood	0.00136521	1.14937e-05	0.00186226	3.39853e-05	0.000127389
1845	2448	PML	MR4	Promyelocytic cell	Bone Marrow	7.8834e-05	3.44622e-05	2.17475e-05	3.42135e-05	0.000128176
1846	46351	JUND	SK-N-SH	Neuroblastoma cell	Brain	0.000533544	1.18262e-05	0.00173342	3.44791e-05	0.000129101
1847	7323	FOXA1	HepG2	Epithelium	Liver	1.48265e-05	0.000424965	5.89638e-05	3.45783e-05	0.000129402
1848	36312	RELA	GM12892	Lymphoblastoid	Blood	2.40667e-05	3.98416e-05	5.73299e-05	3.56745e-05	0.000133432
1849	55284	5MC	LNCaP	Epithelium	Prostate	0.0059095	1.21399e-05	0.0311784	3.63309e-05	0.000135813
1850	45237	CHD1	H1	Embryonic Stem Cell	Embryo	2.04811e-05	9.35153e-05	4.38906e-05	3.64508e-05	0.000136188
1851	36843	TCF7L2	MDA-MB-453	Epithelium	Mammary Gland	4.85536e-05	6.37736e-05	2.32287e-05	3.78184e-05	0.000141221
1852	48085	AR	HEK293	Epithelium	Embryonic Kidney	0.000511411	1.30358e-05	0.0165784	3.8106e-05	0.000142219
1853	58640	MED1	LNCaP-abl	Epithelium	Prostate	5.69172e-05	2.56002e-05	4.81576e-05	3.87613e-05	0.000144586
1854	42272	CTCF	GM12878	B Lymphocyte	Blood	0.000127945	0.00266541	1.45269e-05	3.89464e-05	0.000145198
1855	47325	FOXA1	DU145	Epithelium	Prostate	5.66189e-05	2.07373e-05	9.04974e-05	3.89943e-05	0.000145298
1856	46086	EGR1	ECC-1	Epithelium	Endometrium	8.22008e-05	0.00011785	1.78642e-05	3.91499e-05	0.0001458
1857	63122	MBD1_isoform2	HepG2	Epithelium	Liver	4.75573e-05	4.52355e-05	3.15533e-05	4.00929e-05	0.000149231
1858	35739	FAIRE	MCF-7	Epithelium	Breast	6.33443e-05	2.46041e-05	5.44843e-05	4.01153e-05	0.000149234
1859	68080	AR	C4-2	None	Prostate	0.000206365	1.51331e-05	0.000315278	4.04871e-05	0.000150536
1860	1628	PHF8	Hs68	Fibroblast	Foreskin	6.71681e-05	2.59997e-05	5.04147e-05	4.09918e-05	0.000152331
1861	5459	CEBPB	LS180	Epithelium	Colon	8.60832e-05	1.67897e-05	0.000601039	4.11857e-05	0.000152969
1862	34017	SMAD3	BG03	Embryonic Stem Cell	Embryo	7.90727e-05	4.19922e-05	2.75434e-05	4.12276e-05	0.000153042
1863	34236	STAT3	MCF-10A	Epithelium	Breast	2.91767e-05	0.000109442	3.45166e-05	4.14463e-05	0.000153772
1864	77271	L3MBTL4	HepG2	Epithelium	Liver	3.53201e-05	5.07479e-05	4.25244e-05	4.19383e-05	0.000155514
1865	69558	PSIP1	MV4-11	Leukemia Cell	None	0.000129041	3.20221e-05	3.08764e-05	4.20373e-05	0.000155716
1866	49869	GABPA	SK-N-MC	None	Brain	0.00028733	1.8229e-05	7.67682e-05	4.20378e-05	0.000155716
1867	32856	TERC	HeLa	Epithelium	Cervix	1.74956e-05	0.159276	7.33247e-05	4.23722e-05	0.00015687
1868	75848	CTCF	Rh4	rhabdomyosarcoma	None	0.000190493	0.000687597	1.56228e-05	4.24251e-05	0.000156982
1869	73446	RUNX1	THP-1	AML cell line	None	0.000105295	2.08971e-05	7.64057e-05	4.25902e-05	0.000157509
1870	1990	FOS	K562	Erythroblast	Bone Marrow	0.000199706	0.000133468	1.74774e-05	4.30313e-05	0.000159055
1871	73965	ZNF263	293T	None	None	3.7435e-05	0.000171681	2.72017e-05	4.329e-05	0.000159925
1872	45713	CTCF	None	Epithelium	None	5.76977e-05	0.00030882	2.05939e-05	4.33978e-05	0.000160238
1873	45743	JUND	HeLa-S3	Epithelium	Cervix	0.000112492	1.96659e-05	0.000115443	4.38588e-05	0.000161854
1874	69799	NR1H3	HT29	colorectal adenocarcinoma	None	0.000135814	0.00167677	1.65952e-05	4.39768e-05	0.000162203
1875	68227	NR3C1	BEAS-2B	Epithelium	Lung	4.49938e-05	4.52178e-05	4.88067e-05	4.62753e-05	0.000170589
1876	41303	IRF1	None	Monocyte	Blood	8.18269e-05	2.39875e-05	9.89116e-05	4.68608e-05	0.000172655
1877	8563	GPS2	HEK293T	Epithelium	Embryonic Kidney	4.28064e-05	4.69538e-05	5.18394e-05	4.69125e-05	0.000172754
1878	74143	FOXA1	T47D	None	Breast	0.000117259	5.54556e-05	2.70178e-05	4.71897e-05	0.000173682
1879	45999	FOS	MCF-10A	Epithelium	Breast	1.91683e-05	0.000363641	0.000120498	4.74546e-05	0.000174564
1880	62534	BCL3	A549	Epithelium	Lung	0.000212124	2.3556e-05	6.61697e-05	4.81704e-05	0.000177103
1881	68967	PR	T47D	None	Breast	4.06302e-05	0.000514639	2.80635e-05	4.82402e-05	0.000177265
1882	38340	BRD4	None	T Lymphocyte	Blood	0.000109613	2.94249e-05	5.32512e-05	4.84757e-05	0.000178036
1883	51333	ASH2L	VCaP	Epithelium	Prostate	5.21632e-05	2.67429e-05	0.000206456	4.88541e-05	0.000179331
1884	55869	BRD4	293T-Rex	None	None	4.93012e-05	4.98888e-05	4.84005e-05	4.91892e-05	0.000180465
1885	52090	TP53	IMR90	Fibroblast	Lung	6.45598e-05	3.44825e-05	6.33385e-05	4.97695e-05	0.000182497
1886	39577	BACH2	OCI-Ly7	B cell lymphoma	Blood	0.000243113	1.98984e-05	0.000176303	4.9966e-05	0.000183121
1887	62707	CTCF	None	None	Colon	9.90045e-05	6.34191e-05	2.95298e-05	5.02237e-05	0.000183967
1888	58341	MED1	LNCaP-abl	Epithelium	Prostate	8.35043e-05	3.97043e-05	4.44282e-05	5.02766e-05	0.000184064
1889	72611	SP1	A375	Melanoma Cell	None	6.83585e-05	5.98398e-05	3.61932e-05	5.08737e-05	0.000186151
1890	74670	ZNF639	K562	Erythroblast	Bone Marrow	0.000112565	4.18496e-05	3.90455e-05	5.13786e-05	0.000187899
1891	43165	NR2F2	None	Stromal Cell	None	6.93928e-05	2.48576e-05	0.000570482	5.31983e-05	0.000194451
1892	8654	ERG	VCaP	Epithelium	Prostate	3.96247e-05	6.17339e-05	7.10703e-05	5.40483e-05	0.000197377
1893	50411	PPARG	hMADS-3	Adipocyte	Adipose	9.38523e-05	0.00581792	2.23858e-05	5.40559e-05	0.000197377
1894	46002	STAT3	MCF-10A	Epithelium	Breast	4.56187e-05	8.62308e-05	4.56921e-05	5.41484e-05	0.00019761
1895	36774	ZNF143	K562	Erythroblast	Bone Marrow	5.66466e-05	4.68048e-05	6.21158e-05	5.44291e-05	0.00019853
1896	67539	BRD4	HCT-116	Colon cancer cell	Colon	5.71026e-05	5.56718e-05	5.10381e-05	5.44781e-05	0.000198604
1897	74671	ZNF639	K562	Erythroblast	Bone Marrow	7.02387e-05	4.5098e-05	5.41374e-05	5.46621e-05	0.00019917
1898	71024	ARNTL	U2OS	Osteosarcoma cell	None	4.0768e-05	6.8059e-05	6.66011e-05	5.53128e-05	0.000201434
1899	50373	EZH1	None	Proerythroblast	Fetal Liver	5.60802e-05	5.8094e-05	5.30091e-05	5.56486e-05	0.00020255
1900	42314	CTCF	GM12891	Lymphoblastoid	Blood	0.000155416	0.00676012	2.12755e-05	5.59861e-05	0.000203671
1901	62762	PKNOX1	K562	Erythroblast	Bone Marrow	4.5688e-05	0.0003368	3.5609e-05	5.66685e-05	0.000206046
1902	45888	JUN	K562	Erythroblast	Bone Marrow	9.66909e-05	0.000105156	3.04511e-05	5.69352e-05	0.000206906
1903	43397	FOXA1	LNCaP	Epithelium	Prostate	0.0013352	1.9369e-05	0.0039246	5.69987e-05	0.000207028
1904	34467	PAX5	L428-PAX5	B Lymphocyte	None	0.000334921	2.22425e-05	0.000272346	5.81209e-05	0.000210994
1905	1447	HNF4A	HepG2	Epithelium	Liver	2.70406e-05	0.000209408	0.000104053	5.8403e-05	0.000211906
1906	71243	CEBPB	None	Osteoblast	None	0.000605409	2.04386e-05	0.00137631	5.84735e-05	0.000212051
1907	76403	RELB	GM12878	Lymphoblastoid	None	9.39146e-05	3.8103e-05	7.09701e-05	5.88431e-05	0.000213279
1908	2685	ZNF711	SH-SY5Y	None	Bone Marrow	5.62982e-05	6.33302e-05	5.88233e-05	5.93438e-05	0.000214981
1909	64299	NFE2L2	HeLa-S3	Epithelium	Cervix	0.000102446	3.43627e-05	8.78104e-05	5.97006e-05	0.000216067
1910	74356	OTX2	D-341	None	None	0.000189019	2.2444e-05	0.0024986	5.97061e-05	0.000216067
1911	65139	ZBTB42	HEK293	Epithelium	Embryonic Kidney	4.67085e-05	5.00346e-05	0.000132962	6.13289e-05	0.000221824
1912	1087	SMAD4	H9	Embryonic Stem Cell	Embryo	0.000150044	4.54524e-05	5.22205e-05	6.27414e-05	0.000226814
1913	73548	BRD4	SUM159PT	mammary carcinoma cell line	Breast	9.8797e-05	0.000142293	3.34247e-05	6.37382e-05	0.000230297
1914	64321	ZNF362	HEK293	Epithelium	Embryonic Kidney	0.000306601	2.39078e-05	0.000537806	6.39001e-05	0.000230761
1915	53632	STAT5B	None	T Lymphocyte	Blood	0.00012395	8.69348e-05	3.66626e-05	6.40391e-05	0.000231143
1916	58339	MED1	LNCaP-abl	Epithelium	Prostate	8.06263e-05	5.18235e-05	6.94854e-05	6.50891e-05	0.00023481
1917	69764	BRD4	MV4;11	Leukemia Cell	Blood	0.0001143	6.32384e-05	4.8265e-05	6.62529e-05	0.000238884
1918	68839	FOXA1	T47D	Embryonic Stem Cell	Breast	0.000245415	2.55095e-05	0.000539275	6.64744e-05	0.000239557
1919	45587	RELA	GM10847	Lymphoblastoid	Blood	0.000202513	3.25046e-05	0.000124039	6.85483e-05	0.000246903
1920	56037	RAD21	HepG2	Epithelium	Liver	0.000483356	0.0110092	2.40995e-05	6.87218e-05	0.000247398
1921	47326	FOXA1	DU145	Epithelium	Prostate	0.000186132	3.46922e-05	0.000107443	6.89582e-05	0.00024812
1922	64183	BCL3	A549	Epithelium	Lung	0.000101266	6.96017e-05	5.42258e-05	7.02841e-05	0.00025276
1923	36324	RELA	GM19099	Lymphoblastoid	Blood	9.25298e-05	5.21559e-05	8.48282e-05	7.18233e-05	0.000258161
1924	50122	LMNB1	IMR90	Fibroblast	Lung	0.000140176	3.5051e-05	0.000167947	7.20841e-05	0.000258963
1925	63304	ZBTB11	K562	Erythroblast	Bone Marrow	0.000135939	4.21176e-05	9.56686e-05	7.21986e-05	0.00025924
1926	65063	ZNF574	HEK293	Epithelium	Embryonic Kidney	0.000112166	6.19418e-05	6.17501e-05	7.27204e-05	0.000260978
1927	8410	GATA1	None	Proerythroblast	Blood	0.000838976	2.54143e-05	0.00146219	7.27737e-05	0.000261034
1928	65071	KLF12	HEK293	Epithelium	Embryonic Kidney	5.14219e-05	0.000218703	5.83447e-05	7.28883e-05	0.000261309
1929	76809	NEUROG2	None	Fibroblast	Fetal Lung	8.10566e-05	3.74612e-05	0.000495631	7.30835e-05	0.000261828
1930	38589	E2F7	IMR90	Fibroblast	Lung	0.000153782	3.34294e-05	0.000216534	7.31089e-05	0.000261828
1931	72382	SIX1	None	Cortex	Embryonic Kidney	0.000226762	2.92471e-05	0.00043149	7.33158e-05	0.000262433
1932	64746	ZKSCAN1	K562	Erythroblast	Bone Marrow	6.80726e-05	5.20525e-05	0.000150843	7.40174e-05	0.000264808
1933	35704	SUMO2	WI-38	Fibroblast	Lung	0.000524671	2.77995e-05	0.000400592	7.43051e-05	0.000265699
1934	74361	OTX2	D283 Med	None	None	5.37904e-05	5.69455e-05	0.000293416	7.58352e-05	0.00027103
1935	56043	GABPA	HepG2	Epithelium	Liver	0.000202839	3.84298e-05	0.000119599	7.6311e-05	0.00027259
1936	63182	NBN	GM12878	B Lymphocyte	Blood	8.01458e-05	5.66478e-05	0.000110785	7.66153e-05	0.000273535
1937	74426	MAX	MDA-MB-468	None	Breast	6.24993e-05	8.82698e-05	8.50365e-05	7.67485e-05	0.000273641
1938	5049	CTCF	GM19238	Lymphoblastoid	Blood	0.000262901	0.00386926	2.85504e-05	7.675e-05	0.000273641
1939	64074	ZBTB17	HEK293	Epithelium	Embryonic Kidney	5.25594e-05	0.00491693	5.03737e-05	7.67634e-05	0.000273641
1940	54633	NCAPG	MCF-7	Epithelium	Breast	6.81928e-05	6.95161e-05	0.000108054	7.83206e-05	0.000279048
1941	67517	GATA3	MDA-MB-231	Epithelium	Mammary Gland	0.00230296	2.6685e-05	0.00392069	7.8609e-05	0.000279931
1942	621	FOS	GM12878	B Lymphocyte	Blood	0.000230043	6.5038e-05	5.45862e-05	7.88596e-05	0.000280678
1943	43825	TERF1	LCL	Lymphoblastoid	Blood	0.000177248	3.39577e-05	0.000350413	7.90639e-05	0.000281261
1944	56997	DACOR1	None	None	Colon	0.000967487	2.7381e-05	0.00368891	7.93098e-05	0.000281964
1945	64414	HMBOX1	K562	Erythroblast	Bone Marrow	0.000323271	3.3491e-05	0.000205832	7.9343e-05	0.000281964
1946	46099	NR3C1	ECC-1	Epithelium	Endometrium	6.1824e-05	0.00019282	6.13058e-05	7.96331e-05	0.000282849
1947	42483	CTCF	GM19240	Lymphoblastoid	Blood	0.000143843	0.000793491	3.44742e-05	8.06031e-05	0.000286147
1948	48315	SPI1	GM12878	B Lymphocyte	Blood	0.00164997	2.86003e-05	0.000948483	8.19111e-05	0.000290642
1949	44602	BRD4	VCaP	Epithelium	Prostate	4.41391e-05	0.000299188	9.49266e-05	8.21186e-05	0.000291228
1950	45901	GTF3C2	K562	Erythroblast	Bone Marrow	0.000175601	3.91409e-05	0.00019189	8.22937e-05	0.0002917
1951	5666	AR	VCaP	Epithelium	Prostate	5.90889e-05	0.000163051	7.54867e-05	8.26354e-05	0.00029276
1952	45379	HDAC6	K562	Erythroblast	Bone Marrow	0.000164975	7.60333e-05	5.93827e-05	8.32095e-05	0.000294644
1953	43826	TERF2	LCL	Lymphoblastoid	Blood	0.000100804	4.46789e-05	0.000284262	8.37518e-05	0.000296412
1954	63098	SMAD5	GM12878	B Lymphocyte	Blood	0.000175331	5.45121e-05	8.96897e-05	8.52331e-05	0.0003015
1955	53075	RBP2	U937	None	Pleura	9.89534e-05	8.46741e-05	7.61904e-05	8.56146e-05	0.000302695
1956	38203	CTCF	MCF-7	Epithelium	Breast	0.000172513	0.0202139	3.43664e-05	8.5851e-05	0.000303375
1957	74345	OTX2	D283 Med	None	None	0.000123725	4.3157e-05	0.000289536	8.64367e-05	0.000305289
1958	55771	CTCFL	K562	Erythroblast	Bone Marrow	7.06277e-05	0.000120987	8.92921e-05	8.92238e-05	0.000314972
1959	44875	5HMC	None	Erythroid Cell	None	0.000164605	3.70434e-05	0.00194842	8.93289e-05	0.000315182
1960	4970	RELA	GM12878	B Lymphocyte	Blood	0.000218259	4.0384e-05	0.000243244	8.96724e-05	0.000316232
1961	37134	HSF1	None	Epithelium	Mammary Gland	0.00042482	4.98428e-05	9.68939e-05	9.16378e-05	0.000322999
1962	45923	CEBPB	K562	Erythroblast	Bone Marrow	0.00149351	3.19091e-05	0.00149539	9.18068e-05	0.000323429
1963	42218	STAT3	SU-DHL4	B Lymphocyte	Peritoneal Effusion	0.000310984	4.4454e-05	0.000159569	9.38155e-05	0.000330338
1964	34466	PAX5	Namalwa	B Lymphocyte	None	0.000611198	3.4967e-05	0.000643504	9.43737e-05	0.000332134
1965	64281	CEBPB	A549	Epithelium	Lung	0.000254232	3.69839e-05	0.00132255	9.45528e-05	0.000332595
1966	74138	FOXA1	T47D	None	Breast	0.000419038	3.53124e-05	0.00103592	9.47257e-05	0.000333034
1967	51591	SRF	HUES64	Embryonic Stem Cell	Embryo	0.000129494	0.0182292	4.19422e-05	9.4878e-05	0.0003334
1968	68972	ESR1	T47D	None	Breast	0.000139604	8.61674e-05	7.91175e-05	9.55175e-05	0.000335476
1969	396	ZNF143	CUTLL1	T Lymphocyte	Blood	0.000143635	4.98237e-05	0.000231596	9.56916e-05	0.000335917
1970	55300	JUN	MDA-MB-231	Epithelium	Breast	0.000627487	3.47455e-05	0.00108032	9.58466e-05	0.00033629
1971	64751	ZBTB11	HEK293	Epithelium	Embryonic Kidney	5.21524e-05	0.000279612	0.000117786	9.60278e-05	0.000336755
1972	48442	KDM6B	BJ	Fibroblast	Skin	9.44485e-05	8.22549e-05	0.000118008	9.6095e-05	0.00033682
1973	52495	TCF21	None	None	Coronary artery smooth muscle	0.000374079	3.65429e-05	0.00112091	9.69918e-05	0.000339641
1974	45748	IRF3	HeLa-S3	Epithelium	Cervix	0.000152073	8.81477e-05	7.68757e-05	9.69982e-05	0.000339641
1975	38820	BARX2	LoVo	None	Colon	0.000204478	8.38326e-05	7.12327e-05	9.7221e-05	0.000340249
1976	46304	HDAC2	K562	Erythroblast	Bone Marrow	0.000232174	4.56491e-05	0.000218215	9.74153e-05	0.000340756
1977	34389	SMARCA4	None	None	None	0.000298996	4.42476e-05	0.00022181	9.85125e-05	0.00034442
1978	58342	MED1	LNCaP-abl	Epithelium	Prostate	0.00012038	9.47147e-05	9.18963e-05	0.000100851	0.000352418
1979	68570	POU3F2	None	Neural Progenitor Cell	None	7.65325e-05	0.000120082	0.000120503	0.000101035	0.000352884
1980	46242	RXRA	HepG2	Epithelium	Liver	6.83086e-05	0.000430084	7.9005e-05	0.000101276	0.000353546
1981	4961	RELA	GM10847	Lymphoblastoid	Blood	0.000218279	5.1949e-05	0.000182068	0.000102307	0.000356966
1982	57114	LEF1	RL95-2	None	Uterus	0.000116383	8.39968e-05	0.000118084	0.00010357	0.000361187
1983	45814	CEBPB	HepG2	Epithelium	Liver	0.0006776	3.73655e-05	0.00381725	0.000105262	0.000366903
1984	42445	CTCF	GM19238	Lymphoblastoid	Blood	0.000287122	0.00326761	4.07525e-05	0.000105905	0.00036896
1985	1740	FOS	None	Endothelial Cell	Umbilical Vein	0.00113751	3.74054e-05	0.00279499	0.000107254	0.000373471
1986	46270	ZBTB33	K562	Erythroblast	Bone Marrow	0.000162778	7.0986e-05	0.000132625	0.000108028	0.000375975
1987	41619	RELA	None	Endothelial Cell	Umbilical Vein	0.000283173	5.44487e-05	0.000173638	0.000108474	0.000377339
1988	45557	BHLHE40	A549	Epithelium	Lung	9.62189e-05	0.000122522	0.000111428	0.000108975	0.000378892
1989	43047	BRD2	MM1.S	B Lymphocyte	Blood	0.000274343	6.67233e-05	0.000113048	0.000109178	0.000379405
1990	32899	RELA	None	Endothelial Cell	Umbilical Vein	0.000138339	7.75477e-05	0.000137487	0.0001095	0.000380332
1991	72606	CDK9	A375	Melanoma Cell	None	0.00127217	4.35163e-05	0.000322299	0.000111654	0.000387621
1992	40220	BRD4	H2171	Epithelium	Lung	0.000186809	0.000262448	5.72328e-05	0.00011263	0.000390813
1993	45801	MAFF	HepG2	Epithelium	Liver	0.0055028	3.81268e-05	0.00860576	0.000113096	0.000392233
1994	63285	OSR2	HEK293	Epithelium	Embryonic Kidney	0.000616398	4.11246e-05	0.00190807	0.000113367	0.000392975
1995	41411	ERCC3	HT1080	None	Connective Tissue	0.000210143	6.02184e-05	0.000213056	0.000115126	0.000398871
1996	58639	MED1	LNCaP-abl	Epithelium	Prostate	0.000146171	8.92391e-05	0.000127159	0.00011578	0.000400936
1997	52682	FOXA2	CyT49	Embryonic Stem Cell	Embryo	0.000158027	0.00123524	5.42015e-05	0.000117246	0.00040564
1998	62947	ZNF766	K562	Erythroblast	Bone Marrow	0.000401367	5.77095e-05	0.000173444	0.000117255	0.00040564
[truncated: 4,914 more rows]

## Sheet: Genes Rhythmic Phase Delay
LISA_Genes rhythmic (weighted BIC - 0.75) in young and old with phase delayed (q - 0.05)
Rank	sample_id	factor	cell_line	cell_type	tissue	DNase_p_value	ChIP-seq_p_value	H3K27ac_p_value	summary_p_value	q_value
1	57111	EPO	RL95-2	None	Uterus	2.59002e-11	5.43458e-11	4.99002e-11	3.89355e-11	2.69122e-07
2	71066	ESR1	MCF-7	None	Breast	0.0196257	5.26608e-07	5.83207e-07	8.30185e-07	0.00286912
3	72611	SP1	A375	Melanoma Cell	None	2.85256e-06	1.4804e-06	1.99183e-06	1.96321e-06	0.00354609
4	50973	NR2C2	WI-38	Fibroblast	Lung	0.000361671	1.93252e-06	1.6245e-06	2.64132e-06	0.00354609
5	6588	ESR1	T47D	Epithelium	Mammary Gland	0.0518732	1.85415e-06	2.01728e-06	2.89836e-06	0.00354609
6	71022	CLOCK	U2OS	Osteosarcoma cell	None	1.43567e-06	7.20952e-06	7.1761e-06	3.07821e-06	0.00354609
7	35224	HSF1	M0-91	Leukemia Cell	None	2.96525e-06	5.0462e-06	6.00565e-06	4.274e-06	0.00384373
8	52787	CIITA	Raji	B Lymphocyte	Blood	2.85825e-06	6.19469e-06	6.13304e-06	4.44876e-06	0.00384373
9	36032	SPI1	None	Epithelium	Cervix	0.00498041	2.19461e-06	1.96874e-05	5.92116e-06	0.00454745
10	58921	ESR1	MCF-7	Epithelium	Breast	0.628624	4.97651e-06	5.62564e-06	7.92183e-06	0.00536334
11	57115	LEF1	RL95-2	None	Uterus	6.61572e-06	9.77281e-06	1.02044e-05	8.53541e-06	0.00536334
12	38163	SUZ12	None	None	Bone Marrow	3.50413e-06	0.000133655	0.00014637	1.00103e-05	0.00576593
13	56252	E2F1	None	Epithelium	Mammary Gland	0.000241884	4.50143e-06	3.20643e-05	1.16517e-05	0.00608323
14	3225	E2F4	None	Adipocyte	Adipose	4.24843e-05	6.13278e-06	1.76473e-05	1.23324e-05	0.00608323
15	56961	GTF2B	HeLa	Epithelium	Cervix	5.90721e-05	5.24842e-06	0.000233352	1.41678e-05	0.00608323
16	57114	LEF1	RL95-2	None	Uterus	1.19143e-05	1.47992e-05	1.89926e-05	1.46946e-05	0.00608323
17	67807	BRD4	None	None	None	1.10166e-05	1.82756e-05	1.82793e-05	1.49853e-05	0.00608323
18	54051	ESR1	T47D	Epithelium	Mammary Gland	0.0328329	1.13293e-05	9.89358e-06	1.58418e-05	0.00608323
19	46036	JUND	SK-N-SH	Neuroblastoma cell	Brain	1.23881e-05	3.74539e-05	1.61236e-05	1.77051e-05	0.00625912
20	69364	MYCN	SK-N-BE(2)-C	Neuroblastoma cell	None	1.76287e-05	1.83628e-05	1.97442e-05	1.85378e-05	0.00625912
21	35628	NR2F1	None	Neural crest cell	Cranial	0.013118	1.56021e-05	1.06851e-05	1.90164e-05	0.00625912
22	71933	MYC	U2OS	None	Bone	0.000674394	9.67869e-06	0.000261855	2.76189e-05	0.00840412
23	50877	SPI1	None	None	None	2.34459e-05	1.65204e-05	0.000324012	2.82302e-05	0.00840412
24	71067	GATAD2B	HeLa	Epithelium	Cervix	0.00331613	1.16562e-05	7.34809e-05	3.00898e-05	0.00840412
25	63449	DEAF1	K562	Erythroblast	Bone Marrow	4.33393e-05	2.52191e-05	2.82412e-05	3.057e-05	0.00840412
26	64946	BHLHE40	IMR90	Fibroblast	Lung	0.000775309	1.10172e-05	0.000438424	3.18005e-05	0.00840412
27	2094	NFYA	K562	Erythroblast	Bone Marrow	0.00333694	1.36822e-05	6.39677e-05	3.37001e-05	0.00840412
28	38299	MYC	H128	Epithelium	Lung	1.77644e-05	4.98744e-05	8.49081e-05	3.40445e-05	0.00840412
29	62932	BCL3	A549	Epithelium	Lung	6.77196e-05	1.7517e-05	0.000109323	3.70364e-05	0.00882744
30	45750	E2F1	HeLa-S3	Epithelium	Cervix	7.50049e-05	1.88427e-05	0.000137876	4.07297e-05	0.00905601
31	46000	E2F4	MCF-10A	Epithelium	Breast	0.00441704	1.88835e-05	5.29213e-05	4.16212e-05	0.00905601
32	45866	MXI1	IMR90	Fibroblast	Lung	0.000724062	1.56459e-05	0.000223982	4.30043e-05	0.00905601
33	46274	CREB1	K562	Erythroblast	Bone Marrow	0.000235492	1.71928e-05	0.00014335	4.32361e-05	0.00905601
34	77457	SON	K562	Leukemia	None	3.23262e-05	5.25458e-05	6.30124e-05	4.55681e-05	0.00926372
35	36075	MYOD1	None	Myoblast	None	0.000933781	2.61292e-05	5.86009e-05	5.31851e-05	0.0105033
36	44325	E2F1	LNCaP	Epithelium	Prostate	0.000312827	2.05698e-05	0.000419276	5.53539e-05	0.0106279
37	77077	ZNF613	293T	None	None	0.00414086	3.7614e-05	3.99359e-05	5.78397e-05	0.0108051
38	63322	ELK1	K562	Erythroblast	Bone Marrow	5.71262e-05	8.13407e-05	5.33687e-05	6.1809e-05	0.0108502
39	38485	FAIRE	None	None	Pancreatic Islet	2.7216e-05	0.000177098	0.00017838	6.25056e-05	0.0108502
40	68961	RNF2	NCCIT	Embryonal carcinoma cell	None	0.116651	4.49037e-05	4.49984e-05	6.7414e-05	0.0108502
41	50879	SPI1	None	None	None	0.000891509	2.40198e-05	0.000670024	6.78019e-05	0.0108502
42	1298	NR2C2	HeLa-S3	Epithelium	Cervix	0.000665377	4.20668e-05	5.55735e-05	6.9334e-05	0.0108502
43	46302	SIX5	K562	Erythroblast	Bone Marrow	4.80813e-05	8.4931e-05	9.75755e-05	7.00593e-05	0.0108502
44	59377	ESR1	T47D	Epithelium	Mammary Gland	0.0518313	4.86359e-05	5.18982e-05	7.52851e-05	0.0108502
45	74838	JMJD6	None	3565 cells	None	0.000100776	3.41593e-05	0.00196333	7.55536e-05	0.0108502
46	49267	BMI1	293T-Rex	None	None	0.19077	4.15694e-05	7.0417e-05	7.84071e-05	0.0108502
47	67710	CREB1	LNCaP	Epithelium	Prostate	0.00245651	3.62412e-05	0.000136734	8.49535e-05	0.0108502
48	64290	ZBTB11	K562	Erythroblast	Bone Marrow	0.000149867	8.01735e-05	6.48227e-05	8.67748e-05	0.0108502
49	46347	USF1	SK-N-SH	Neuroblastoma cell	Brain	0.000435296	3.44029e-05	0.000331551	8.72581e-05	0.0108502
50	5555	ESR1	H3396	Epithelium	Mammary Gland	0.10311	5.19043e-05	6.75806e-05	8.8047e-05	0.0108502
51	45951	E2F4	K562	Erythroblast	Bone Marrow	0.000365365	3.41234e-05	0.000515758	8.82839e-05	0.0108502
52	74573	SPIN1	T778	None	None	4.99608e-05	0.000133104	0.000167018	8.95095e-05	0.0108502
53	50878	SPI1	None	None	None	6.81163e-05	6.42726e-05	0.000325691	9.00633e-05	0.0108502
54	50876	SPI1	None	None	None	7.34353e-05	5.95788e-05	0.0004411	9.18302e-05	0.0108502
55	46001	MYC	MCF-10A	Epithelium	Breast	0.0126161	0.000149682	3.88691e-05	9.23434e-05	0.0108502
56	67711	CREB1	LNCaP	Epithelium	Prostate	0.00122983	3.46699e-05	0.000419248	9.36277e-05	0.0108502
57	37605	FAIRE	None	Epithelium	Mammary Gland	0.00729705	7.63141e-05	5.33253e-05	9.37687e-05	0.0108502
58	63763	ZNF48	HEK293	Epithelium	Embryonic Kidney	3.24193e-05	0.00206095	0.00195331	9.42124e-05	0.0108502
59	56126	APOBEC3B	MCF-7	Epithelium	Breast	0.290014	5.65847e-05	7.13084e-05	9.46413e-05	0.0108502
60	37334	CREB1	A549	Epithelium	Lung	4.75745e-05	0.000125684	0.000417825	9.56343e-05	0.0108502
61	50977	NR2C2	HeLa	Epithelium	Cervix	0.00230908	7.55e-05	5.76384e-05	9.6688e-05	0.0108502
62	72500	ESR1	None	None	Breast	0.00022276	6.89348e-05	8.45385e-05	9.73251e-05	0.0108502
63	6587	ESR1	T47D	Epithelium	Mammary Gland	0.166602	6.21252e-05	7.61762e-05	0.000102636	0.0111561
64	44333	E2F1	LNCaP	Epithelium	Prostate	0.00135175	4.30146e-05	0.000232939	0.00010608	0.0111561
65	44336	E2F1	LNCaP	Epithelium	Prostate	0.000729099	4.10988e-05	0.000514612	0.000108513	0.0111561
66	68460	ATF3	HCT-116	Colon cancer cell	Colon	0.000452905	4.86042e-05	0.000211452	0.000109045	0.0111561
67	36031	FAIRE	None	Epithelium	Cervix	0.0224807	6.77686e-05	7.8997e-05	0.000109253	0.0111561
68	46191	JUND	H1	Embryonic Stem Cell	Embryo	0.000122019	5.39075e-05	0.00169988	0.000109753	0.0111561
69	62535	BCL3	A549	Epithelium	Lung	7.02816e-05	0.000120291	0.000246847	0.000112813	0.0113009
70	56050	CREB1	HepG2	Epithelium	Liver	0.0011278	5.37873e-05	0.000190684	0.000121346	0.0119205
71	1299	NR2C2	HeLa-S3	Epithelium	Cervix	0.0248502	6.67599e-05	0.000105473	0.000122447	0.0119205
72	45892	JUN	K562	Erythroblast	Bone Marrow	0.000948511	9.52967e-05	7.99854e-05	0.00012474	0.011975
73	45902	ATF3	K562	Erythroblast	Bone Marrow	0.00012201	0.000106003	0.000174379	0.0001284	0.0121343
74	49009	CPSF3L	HeLa	Epithelium	Cervix	9.13393e-05	0.000164653	0.000164706	0.00012991	0.0121343
75	53957	ESR1	T47D	Epithelium	Mammary Gland	0.339894	8.23557e-05	0.000103736	0.000137716	0.0125711
76	58937	NRF1	None	Epithelium	None	0.00194156	5.18522e-05	0.000525394	0.000138224	0.0125711
77	55339	SUMO2	K562	Erythroblast	Bone Marrow	0.000118203	0.000292875	0.00011104	0.000143677	0.012647
78	45888	JUN	K562	Erythroblast	Bone Marrow	0.000380984	6.49375e-05	0.000350155	0.000143678	0.012647
79	2110	PRAME	K562	Erythroblast	Bone Marrow	0.00987114	8.73781e-05	0.000115147	0.000148292	0.012647
80	63734	ELF1	K562	Erythroblast	Bone Marrow	0.00245419	0.00011125	9.27275e-05	0.000148658	0.012647
81	63155	GABP	HepG2	Epithelium	Liver	0.00161596	6.21227e-05	0.000292037	0.000148956	0.012647
82	46282	TAF1	K562	Erythroblast	Bone Marrow	0.00045491	5.92751e-05	0.0010794	0.000150036	0.012647
83	33156	ESR1	MCF-7	Epithelium	Breast	6.15975e-05	0.000497579	0.0010783	0.000156482	0.0130314
84	7461	BCL3	K562	Erythroblast	Bone Marrow	0.000863218	0.000114478	0.00011413	0.000160809	0.0132323
85	46343	NFIC	SK-N-SH	Neuroblastoma cell	Brain	0.00309206	0.000131735	9.68779e-05	0.000164504	0.0133771
86	70759	OGT	HEK293	HEK 293 Cell Line	None	0.00360302	8.27603e-05	0.000183953	0.00016857	0.0135483
87	50898	PAX6	6540 cells	Epithelium	None	0.00437877	8.11307e-05	0.000200193	0.000170947	0.0135712
88	57110	EPO	RL95-2	None	Uterus	0.000177926	0.00016617	0.00017468	0.000172781	0.0135712
89	65115	MAZ	HEK293	Epithelium	Embryonic Kidney	0.0015016	6.30471e-05	0.00173447	0.000175401	0.0136222
90	44337	E2F1	LNCaP	Epithelium	Prostate	0.0033294	6.37748e-05	0.00124568	0.000178749	0.0137279
91	33168	MYC	P493-6	B cell lymphoma	None	0.00129933	7.39628e-05	0.000435384	0.000180867	0.0137379
92	41127	ESR1	None	Epithelium	Mammary Gland	0.0432798	0.000108562	0.000142012	0.000184322	0.0138482
93	64107	KDM4B	K562	Erythroblast	Bone Marrow	0.00285904	7.52681e-05	0.000649429	0.000197688	0.0145966
94	45857	MYC	None	Endothelial Cell	Umbilical Vein	0.020791	7.60253e-05	0.000570726	0.000200619	0.0145966
95	8112	MYC	None	Endothelial Cell	Umbilical Vein	0.020791	7.60253e-05	0.000570726	0.000200619	0.0145966
[truncated: 6,817 more rows]

## Sheet: Rhythmic in Old not Young
LISA_Genes rhythmic in old but not in young (weighted BIC - 0.75)
[truncated: 6,913 more rows]

## Sheet: Rhythmic in Young not Old
LISA_Genes rhythmic in young but not in old (weighted BIC - 0.75)
[truncated: 6,913 more rows]

[truncated: 2 more sheets: Rhythmicity diff young vs. old, MESOR Increased]
