# Supplementary material for: Evidence for a role of human blood-borne factors in mediating age-associated changes in molecular circadian rhythms
Source: eLife. 2024 Nov 1;12:RP88322. doi: 10.7554/eLife.88322 (PMC11530234; doi:10.7554/eLife.88322)
Supplement: Supplementary file 1. — Total sleep time (TST) was calculated from ActiLife 6 determined in-bed and out-of-bed times averaged across nights with available actigraphy data (≥7 nights). Old (N=8), Y-young (N=7). For the RNAseq we did a pilot experiment which had one young and one old (Supplementary file 4). The young sample didn’t have enough serum left to include that individual in the actual experiment (n=4 per group), but the old subject did. So, one old subject was used in both figures and the young were different. [file elife-88322-supp1.xlsx]

## Sheet: Table S1
Age Group	Sex	Age (y)	BMI (kg/m^2)	Total Sleep Time (TST) [h]	Actigraphy	MCTQ	Grip Strength	EKG	RNA-seq
20-35	Female	25	23.7	6.6	Yes	Yes	Yes	No	No
	Female	28	21.2	6.9	Yes	No	Yes	Yes	Yes
	Male	28	25	9.7	Yes	Yes	Yes	Yes	Yes
	Male	28	25.2	7.4	Yes	No	Yes	No	Yes
	Male	28	25.9	9.3	Yes	Yes	Yes	Yes	No
	Female	30	28.7	7.4	Yes	Yes	Yes	Yes	Yes
	Male	30	25.9	6.4	Yes	Yes	Yes	Yes	Yes
Young	Mean	28.1	25.1	7.7	—	—	—	—	—
	SD	1.7	2.3	1.3	—	—	—	—	—
70-85	Male	70	26.8	6.7	Yes	No	Yes	Yes	No
	Male	71	26.7	11.3	Yes	Yes	Yes	No	Yes
	Female	73	32.4	7.7	Yes	Yes	Yes	No	Yes
	Male	73	21.5	6.6	Yes	Yes	Yes	Yes	No
	Female	74	26.4	7.5	Yes	No	Yes	No	No
	Male	74	27.2	7	Yes	Yes	Yes	Yes	Yes
	Male	75	28.8	7.8	Yes	Yes	Yes	Yes	No
	Female	76	22.3	5.8	Yes	Yes	Yes	Yes	Yes
Old	Mean	73.3	26.5	7.6	—	—	—	—	—
	SD	2	3.4	1.7	—	—	—	—	—
