# Supplementary material for: Evidence for a role of human blood-borne factors in mediating age-associated changes in molecular circadian rhythms
Source: eLife. 2024 Nov 1;12:RP88322. doi: 10.7554/eLife.88322 (PMC11530234; doi:10.7554/eLife.88322)
Supplement: Supplementary file 2. — A log of which participants were included in our biopatch data based on equipment function. [file elife-88322-supp2.xlsx]

## Sheet: MoreCondensed
Age Group	Record id	BioPatch EKG data collected?	Reason why BioPatch EKG data was not collected	Course of action on to address the missingness in the BioPatch data collection
Young	1	Yes		We experienced similar missingness of BioPatch EKG data in our study on "Variability in Analgesic Response to Ibuprofen Following Third Molar Extraction" (IRB#832417). To minimize missingness of EKG data for future studies, we adopted an alternate wearable device, Bittium Faros. In our study on the aging chronobiome (IRB #834156), we have had no issues with data collection using the Bittium Faros…
Young	2	Yes
Young	3	No	Device was deployed to participant. When device was returned, we found that data had not been collected during the observational period.
Old	5	Yes
Young	8	Yes
Young	13	Yes
Old	22	No	Device was deployed to participant. When device was returned, we found that data had not been collected during the observational period.
Old	23	No	Device was deployed to participant. When device was returned, we found that data had not been collected during the observational period.
Old	24	Yes
Old	26	Yes
Young	27	No	Device was deployed to participant. When device was returned, we found that data had not been collected during the observational period.
Old	38	No	Device was deployed to participant. When device was returned, we found that data had not been collected during the observational period.
Young	44	Yes
Old	52	Yes
Old	55	Yes
