# Supplementary material for: Evidence for a role of human blood-borne factors in mediating age-associated changes in molecular circadian rhythms
Source: eLife. 2024 Nov 1;12:RP88322. doi: 10.7554/eLife.88322 (PMC11530234; doi:10.7554/eLife.88322)
Supplement: Supplementary file 3. — Table of genes that are rhythmic in both conditions with a decreased MESOR with old serum treatment compared to young serum treatment by CircaCompare. All genes are involved in the cell cycle/DNA replication pathway. [file elife-88322-supp3.xlsx]

## Sheet: Sheet1
Gene	Symbol	Old_mesor_estimate	Young_mesor_estimate
ENSG00000014138	POLA2	1.94222	2.03068
ENSG00000062822	POLD1	2.72752	2.82803
ENSG00000073111	MCM2	3.00398	3.11533
ENSG00000076003	MCM6	3.12412	3.20314
ENSG00000085840	ORC1	2.17744	2.30515
ENSG00000091651	ORC6	2.41506	2.51334
ENSG00000093009	CDC45	2.42883	2.54005
ENSG00000094804	CDC6	2.56689	2.6794
ENSG00000097046	CDC7	2.279	2.37743
ENSG00000100297	MCM5	3.17578	3.28856
ENSG00000101868	POLA1	2.64072	2.72895
ENSG00000104738	MCM4	3.31067	3.4136
ENSG00000112118	MCM3	3.1683	3.26932
ENSG00000117748	RPA2	2.75465	2.79891
ENSG00000131747	TOP2A	3.7223	3.79889
ENSG00000132383	RPA1	3.23858	3.28756
ENSG00000132646	PCNA	3.23276	3.32144
ENSG00000135446	CDK4	3.1433	3.17294
ENSG00000138346	DNA2	2.11345	2.23848
ENSG00000146143	PRIM2	2.62099	2.67536
ENSG00000164815	ORC5	2.36154	2.41468
ENSG00000166508	MCM7	3.38139	3.48244
ENSG00000167258	CDK12	3.10242	3.12918
ENSG00000167513	CDT1	2.474	2.59032
ENSG00000198056	PRIM1	2.1168	2.23196
