# Supplementary material for: Evidence for a role of human blood-borne factors in mediating age-associated changes in molecular circadian rhythms
Source: eLife. 2024 Nov 1;12:RP88322. doi: 10.7554/eLife.88322 (PMC11530234; doi:10.7554/eLife.88322)
Supplement: Supplementary file 4. — Table of genes that are rhythmic in both conditions with a decreased MESOR with old serum treatment compared to young serum treatment by CircaCompare. All genes are involved in the cholesterol biosynthesis pathway. [file elife-88322-supp4.xlsx]

## Sheet: Sheet1
Gene	Symbol	Old_mesor_estimate	Young_mesor_estimate
ENSG00000001630	CYP51A1	2.04038	1.87121
ENSG00000079459	FDFT1	3.33029	3.19002
ENSG00000104549	SQLE	3.11682	2.95039
ENSG00000110921	MVK	2.53017	2.4122
ENSG00000112972	HMGCS1	2.93112	2.69609
ENSG00000113161	HMGCR	3.01198	2.83332
ENSG00000116133	DHCR24	3.50629	3.34349
ENSG00000120437	ACAT2	2.71791	2.58109
ENSG00000132196	HSD17B7	1.94044	1.78252
ENSG00000147383	NSDHL	2.5403	2.46885
ENSG00000160285	LSS	3.4868	3.41143
ENSG00000160752	FDPS	3.14359	3.08136
ENSG00000167508	MVD	2.81996	2.68386
ENSG00000172893	DHCR7	2.99062	2.79757
